# Supplementary material for: Dosage-sensitive functions in embryonic development drove the survival of genes on sex-specific chromosomes in snakes, birds, and mammals
Source: HighWire-hosted journal article supplement (doi:10.1101/gr.268516.120), 2021-01-21
Supplement: Supplemental_Table_S1.xlsx [file Supplemental_Table_S1.xlsx]

## Sheet: Sheet1
Supplemental Table S1. Genomic resources used in this study.
Genomic Resources										Analyses
Common name	Scientific name	Sex chromosome system	Comprehensive Y/W gene predictions	Y/W gene set confidence	Y/W assembly method	Genome assembly	Genome scaffold n50	Genome sex	Genome citation	Caenophidian Ancestral Z	Caenophidian Strata	Caenophidian PAR	Avian ancestral Z_Order	Surviving Y/W genes	pHI	ExAC	OMIM	Pct Score	miRNA sites	Expression Breadth	Embryonic Expression	Ensembl 96 dN/dS	Neurodevelopmental disorders	Congenital Heart Defects	Congenital Anomalies of the Kidney and Urinary Tract	Sex-specific tissue expression
Human	Homo sapiens	Therian XY	(Skaletsky et al. 2003)	High	SHIMS	GCF_000001405.26	67794873	male and female	(International Human Genome Sequencing Consortium, 2004)	Autosomal orthologs	Autosomal orthologs	NA	Autosomal orthologs	Yes	(Huang et al. 2010)	(Ruderfer et al. 2016)	(McKusick-Nathans Institute of Genetic Medicine 2019)	(Friedman et al. 2009)	(Agarwal et al. 2015)	(Merkin et al. 2012)	(Petropoulos et al. 2016)	Human-Mouse	(Wang, Corominas, and Lin 2019)	(Homsy et al. 2015)	(Sanna-Cherchi et al. 2018)	(GTEx Consortium 2017)
Chicken	Gallus gallus	Avian ZW	(Bellott et al. 2017)	High	SHIMS	GCF_000002315.6	20785086	female	(Hillier et al. 2004)	Autosomal orthologs	Autosomal orthologs	NA	Z-linked orthologs	Yes	NA	NA	NA	NA	(Agarwal et al. 2015)	(Merkin et al. 2012)	(Ayers et al. 2013)	Chicken-Finch	NA	NA	NA	(McCarthy et al. 2019)
Cattle	Bos taurus	Therian XY	(Bellott et al. 2014)	High	SHIMS	GCF_000003205.7	6806220	male and female	(The Bovine Genome Sequencing and Analysis Consortium et al. 2009)	NA	NA	NA	NA	Yes	NA	NA	NA	NA	NA	NA	NA	NA	NA	NA	NA	NA
Rat	Rattus norvegicus	Therian XY	(Bellott et al. 2014)	High	SHIMS	GCF_000001895.5	14986627	male and female	(Rat Genome Sequencing Project Consortium 2004)	NA	NA	NA	NA	Yes	NA	NA	NA	NA	NA	NA	NA	NA	NA	NA	NA	NA
Dog	Canis lupus familiaris	Therian XY	(Li et al. 2013)	High	Shotgun of pooled BACs from single haplotype	GCA_000002285.2	45876610	female	(Lindblad-Toh et al. 2005)	NA	NA	NA	NA	Yes	NA	NA	NA	NA	NA	NA	NA	NA	NA	NA	NA	NA
Chimpanzee	Pan troglodytes	Therian XY	(Hughes et al. 2010)	High	SHIMS	GCF_002880755.1	53103722	male	(The Chimpanzee Sequencing and Analysis Consortium 2005)	NA	NA	NA	NA	Yes	NA	NA	NA	NA	NA	NA	NA	NA	NA	NA	NA	NA
Mouse	Mus musculus	Therian XY	(Soh et al. 2014)	High	SHIMS	GCF_000001635.20	54517951	male and female	(Mouse Genome Sequencing Consortium 2002)	NA	NA	NA	NA	Yes	NA	NA	NA	NA	NA	NA	NA	Human-Mouse	NA	NA	NA	NA
Gray short-tailed opossum	Monodelphis domestica	Therian XY	(Bellott et al. 2014)	High	SHIMS	GCF_000002295.2	59809810	female	(Mikkelsen et al. 2007)	NA	NA	NA	NA	Yes	NA	NA	NA	NA	NA	NA	NA	NA	NA	NA	NA	NA
Rhesus macaque	Macaca mulatta	Therian XY	(Hughes et al. 2012)	High	SHIMS	GCF_003339765.1	82346004	female	(Rhesus Macaque Genome Sequencing and Analysis Consortium et al. 2007)	NA	NA	NA	NA	Yes	NA	NA	NA	NA	NA	NA	NA	NA	NA	NA	NA	NA
Cat	Felis catus	Therian XY	(Li et al. 2013)	High	Shotgun of pooled BACs from single haplotype	GCF_000181335.3	83967707	female	(Pontius et al. 2007)	NA	NA	NA	NA	Yes	NA	NA	NA	NA	NA	NA	NA	NA	NA	NA	NA	NA
Horse	Equus ferus caballus	Therian XY	(Janečka et al. 2018)	High	SHIMS and Shotgun of pooled BACs from multiple haplotypes	GCF_002863925.1	87230776	female	(Wade et al. 2009)	NA	NA	NA	NA	Yes	NA	NA	NA	NA	NA	NA	NA	NA	NA	NA	NA	NA
Pig	Sus scrofa	Therian XY	(Skinner et al. 2016)	High	SHIMS	GCF_000003025.6	88231837	female	(Groenen et al. 2012)	NA	NA	NA	NA	Yes	NA	NA	NA	NA	NA	NA	NA	NA	NA	NA	NA	NA
Common marmoset	Callithrix jacchus	Therian XY	(Bellott et al. 2014)	High	SHIMS	GCF_009663435.1	98198953	female	(The Marmoset Genome Sequencing and Analysis Consortium 2014)	NA	NA	NA	NA	Yes	NA	NA	NA	NA	NA	NA	NA	NA	NA	NA	NA	NA
Tammar wallaby	Macropus eugenii	Therian XY	(Murtagh et al. 2012)	Intermediate	Unfinished BACs from multiple haplotypes	GCA_000004035.1	36602	female	(Renfree et al. 2011)	NA	NA	NA	NA	Yes	NA	NA	NA	NA	NA	NA	NA	NA	NA	NA	NA	NA
Lawes's parotia	Parotia lawesii	Avian ZW	(Xu et al. 2019a)	Intermediate	Female WGS & Subtraction using Male WGS	GCA_003713295.1	3066654	female	(Xu et al. 2019a)	NA	NA	NA	NA	Yes	NA	NA	NA	NA	NA	NA	NA	NA	NA	NA	NA	NA
Red bird-of-paradise	Paradisaea rubra	Avian ZW	(Xu et al. 2019a)	Intermediate	Female WGS & Subtraction using Male WGS	GCA_003713215.1	3264865	female	(Xu et al. 2019a)	NA	NA	NA	NA	Yes	NA	NA	NA	NA	NA	NA	NA	NA	NA	NA	NA	NA
Emu	Dromaius novaehollandiae	Avian ZW	(Zhou et al. 2014)	Intermediate	Female WGS & Subtraction using Male WGS	GCF_003342905.1	3305683	male	(Sackton et al. 2019)	NA	NA	NA	Z-linked orthologs	Yes	NA	NA	NA	NA	NA	NA	NA	NA	NA	NA	NA	NA
Crested Ibis	Nipponia nippon	Avian ZW	(Zhou et al. 2014)	Intermediate	Female WGS & Subtraction using Male WGS	GCF_000708225.1	5211696	male	(Zhang et al. 2014)	NA	NA	NA	NA	Yes	NA	NA	NA	NA	NA	NA	NA	NA	NA	NA	NA	NA
Medium ground finch	Geospiza fortis	Avian ZW	(Xu et al. 2019a)	Intermediate	Female WGS & Subtraction using Male WGS	GCF_000277835.1	5255844	female	(Zhang et al. 2014)	NA	NA	NA	NA	Yes	NA	NA	NA	NA	NA	NA	NA	NA	NA	NA	NA	NA
House sparrow	Passer domesticus	Avian ZW	(Xu et al. 2019a)	Intermediate	Female WGS & Subtraction using Male WGS	GCA_001700915.1	6373860	female	(Elgvin et al. 2017)	NA	NA	NA	NA	Yes	NA	NA	NA	NA	NA	NA	NA	NA	NA	NA	NA	NA
Collared flycatcher	Ficcedula albicollis	Avian ZW	(Smeds et al. 2014)	Intermediate	Female WGS & Subtraction using Male WGS	GCF_000247815.1	6542656	male	(Ellegren et al. 2012)	NA	NA	NA	NA	Yes	NA	NA	NA	NA	NA	NA	NA	NA	NA	NA	NA	NA
American crow	Corvus brachyrhynchos	Avian ZW	(Xu et al. 2019a)	Intermediate	Female WGS & Subtraction using Male WGS	GCF_000691975.1	6953989	female	(Zhang et al. 2014)	NA	NA	NA	NA	Yes	NA	NA	NA	NA	NA	NA	NA	NA	NA	NA	NA	NA
Tibetan ground-tit	Pseudopodoces humilis	Avian ZW	(Xu et al. 2019a)	Intermediate	Female WGS & Subtraction using Male WGS	GCF_000331425.1	16337386	male	(Cai et al. 2013)	NA	NA	NA	NA	Yes	NA	NA	NA	NA	NA	NA	NA	NA	NA	NA	NA	NA
Gorilla	Gorilla gorilla	Therian XY	(Tomaszkiewicz et al. 2016)	Intermediate	Male WGS enriched for Y & Subtraction using female WGS	GCF_008122165.1	26116462	female	(Gordon et al. 2016)	NA	NA	NA	NA	Yes	NA	NA	NA	NA	NA	NA	NA	NA	NA	NA	NA	NA
Mountain garter snake	Thamnophis elegans	Caenophidian ZW	(Vicoso et al. 2013a; Yin et al. 2016)	Intermediate	Female WGS & Subtraction using Male WGS	Not publicly deposited	11744	male and female	(Vicoso et al. 2013)	Published ZW pairs	Published ZW pairs	Reads from male (SRX326530) and female (SRX326529)	NA	Yes	NA	NA	NA	NA	NA	NA	NA	NA	NA	NA	NA	NA
Pygmy rattlesnake	Sistrurus miliarius	Caenophidian ZW	(Vicoso et al. 2013a; Yin et al. 2016)	Intermediate	Female WGS & Subtraction using Male WGS	Not publicly deposited	12501	male and female	(Vicoso et al. 2013)	Published ZW pairs	Published ZW pairs	Reads from male (SRX326528) and female (SRX326527)	NA	Yes	NA	NA	NA	NA	NA	NA	NA	NA	NA	NA	NA	NA
Five-pacer viper	Deinagkistrodon acutus	Caenophidian ZW	(Yin et al. 2016)	Intermediate	Female WGS & Subtraction using Male WGS	http://dx.doi.org/10.5524/100196	2121080	male and female	(Yin et al. 2016)	Syntenic orthologs of sex-linked genes in caenophidians	Published ZW pairs	NA	NA	Yes	NA	NA	NA	NA	NA	NA	NA	NA	NA	NA	NA	(Yin et al. 2016)
Brown mesite	Mesitornis unicolor	Avian ZW	(Zhou et al. 2014)	Low	Female WGS	GCF_000695765.1	47102	female	(Zhang et al. 2014)	NA	NA	NA	NA	Yes	NA	NA	NA	NA	NA	NA	NA	NA	NA	NA	NA	NA
White-tailed tropicbird	Phaethon lepturus	Avian ZW	(Zhou et al. 2014)	Low	Female WGS	GCF_000687285.1	47896	female	(Zhang et al. 2014)	NA	NA	NA	NA	Yes	NA	NA	NA	NA	NA	NA	NA	NA	NA	NA	NA	NA
Barn owl	Tyto alba	Avian ZW	(Zhou et al. 2014)	Low	Female WGS	GCF_000687205.1	52818	female	(Zhang et al. 2014)	NA	NA	NA	NA	Yes	NA	NA	NA	NA	NA	NA	NA	NA	NA	NA	NA	NA
White-throated tinamou	Tinamus guttatus	Avian ZW	(Zhou et al. 2014)	Low	Female WGS	GCF_000705375.1	246268	female	(Zhang et al. 2014)	NA	NA	NA	Z-linked orthologs	Yes	NA	NA	NA	NA	NA	NA	NA	NA	NA	NA	NA	NA
Raggiana bird-of-paradise	Paradisaea raggiana	Avian ZW	(Xu et al. 2019a)	Low	Female WGS & Subtraction using Male WGS from another species	GCA_003713265.1	882045	female	(Xu et al. 2019a)	NA	NA	NA	NA	Yes	NA	NA	NA	NA	NA	NA	NA	NA	NA	NA	NA	NA
King bird-of-paradise	Cicinnurus regius	Avian ZW	(Xu et al. 2019a)	Low	Female WGS & Subtraction using Male WGS from another species	GCA_003713305.1	3187586	female	(Xu et al. 2019a)	NA	NA	NA	NA	Yes	NA	NA	NA	NA	NA	NA	NA	NA	NA	NA	NA	NA
Ostrich	Struthio camelus	Avian ZW	(Zhou et al. 2014)	Low	Female WGS	GCF_000698965.1	3593425	female	(Zhang et al. 2014)	NA	NA	NA	Z-linked orthologs	Yes	NA	NA	NA	NA	NA	NA	NA	NA	NA	NA	NA	NA
Killdeer	Charadrius vociferus	Avian ZW	(Zhou et al. 2014)	Low	Female WGS	GCF_000708025.1	3657050	female	(Zhang et al. 2014)	NA	NA	NA	NA	Yes	NA	NA	NA	NA	NA	NA	NA	NA	NA	NA	NA	NA
Chimney swift	Chaetura pelagica	Avian ZW	(Zhou et al. 2014)	Low	Female WGS	GCF_000747805.1	3841852	female	(Zhang et al. 2014)	NA	NA	NA	NA	Yes	NA	NA	NA	NA	NA	NA	NA	NA	NA	NA	NA	NA
Turkey	Meleagris gallopavo	Avian ZW	(Wright et al. 2015)	Low	Female WGS	GCF_000146605.3	3898092	female	(Dalloul et al. 2010)	NA	NA	NA	Z-linked orthologs	Yes	NA	NA	NA	NA	NA	NA	NA	NA	NA	NA	NA	NA
Magnificent bird-of-paradise	Cicinnurus magnificus	Avian ZW	(Xu et al. 2019a)	Low	Female WGS & Subtraction using Male WGS from another species	GCA_003713285.1	6488714	female	(Xu et al. 2019a)	NA	NA	NA	NA	Yes	NA	NA	NA	NA	NA	NA	NA	NA	NA	NA	NA	NA
Anna's hummingbird	Calypte anna	Avian ZW	(Zhou et al. 2014)	Low	Female WGS	GCF_003957555.1	74081004	female	(Zhang et al. 2014)	NA	NA	NA	Z-linked orthologs	Yes	NA	NA	NA	NA	NA	NA	NA	NA	NA	NA	NA	NA
Mallard duck	Anas platyrhynchos	Avian ZW	(Zhou et al. 2014; Wright et al. 2015)	Low	Female WGS	GCF_003850225.1	76129154	female	(Zhang et al. 2014)	NA	NA	NA	Z-linked orthologs	Yes	NA	NA	NA	NA	NA	NA	NA	NA	NA	NA	NA	NA
Atlantic canary	Serinus canaria	Avian ZW	(Xu et al. 2019a)	Low	Female WGS & Subtraction using Male WGS from another species	GCF_007115625.1	79047965	male	(Frankl-Vilches et al. 2015)	NA	NA	NA	Z-linked orthologs	Yes	NA	NA	NA	NA	NA	NA	NA	NA	NA	NA	NA	NA
Boa constrictor	Boa constrictor	Boa XY	NA	NA	NA	http://dx.doi.org/10.5524/100060	1253067	male	(Bradnam et al. 2013)	Autosomal orthologs	Exonerate boa autosomal orthologs	NA	NA	No	NA	NA	NA	NA	NA	NA	NA	NA	NA	NA	NA	NA
Green anole	Anolis carolinensis	Anole XY	NA	NA	NA	GCF_000090745.1	4033265	female	(Alföldi et al. 2011)	Autosomal orthologs	Autosomal orthologs	NA	Autosomal orthologs	No	NA	NA	NA	NA	(Agarwal et al. 2015)	NA	NA	Snake-Lizard	NA	NA	NA	NA
Speckled rattlesnake	Crotalus mitchelli	Caenophidian ZW	NA	NA	NA	GCA_000737285.1	5976	female	(Gilbert et al. 2014)	NA	Exonerate ZW pairs	NA	NA	No	NA	NA	NA	NA	NA	NA	NA	NA	NA	NA	NA	NA
Adder	Vipera berus	Caenophidian ZW	NA	NA	NA	GCA_000800605.1	126452	female	(Liu et al. Unpublished)	NA	Exonerate ZW pairs	NA	NA	No	NA	NA	NA	NA	NA	NA	NA	NA	NA	NA	NA	NA
Burmese python	Python molorus bivittatus	Python XY	NA	NA	NA	GCF_000186305.1	215100	female	(Castoe et al. 2013)	NA	Exonerate python X-linked orthologs	NA	NA	No	NA	NA	NA	NA	NA	NA	NA	NA	NA	NA	NA	NA
King cobra	Ophiophagus hannah	Caenophidian ZW	NA	NA	NA	GCA_000516915.1	261857	male	(Vonk et al. 2013)	NA	Exonerate Z-linked orthologs	NA	NA	No	NA	NA	NA	NA	NA	NA	NA	NA	NA	NA	NA	NA
Taiwan habu	Protobothrops mucrosquamatus	Caenophidian ZW	NA	NA	NA	GCF_001527695.2	424052	female	(Aird et al. 2017)	NA	Exonerate ZW pairs	NA	NA	No	NA	NA	NA	NA	NA	NA	NA	NA	NA	NA	NA	NA
Chilean tinamou	Nothoprocta perdicaria	Avian ZW	NA	NA	NA	GCF_003342845.1	3369196	male	(Sackton et al. 2019)	NA	NA	NA	Z-linked orthologs	No	NA	NA	NA	NA	NA	NA	NA	NA	NA	NA	NA	NA
Cassowary	Casuarius casuarius	Avian ZW	NA	NA	NA	GCA_003342895.1	3704890	female	(Sackton et al. 2019)	NA	NA	NA	Z-linked orthologs	No	NA	NA	NA	NA	NA	NA	NA	NA	NA	NA	NA	NA
Zebra finch	Taeniopygia guttata	Avian ZW	NA	NA	NA	GCF_000151805.1	8236790	male	(Warren et al. 2010)	NA	NA	NA	NA	No	NA	NA	NA	NA	NA	NA	NA	Chicken-Finch	NA	NA	NA	NA
American alligator	Alligator mississippiensis	Temperature-dependent sex determination	NA	NA	NA	GCF_000281125.3	18600682	mixed	(St John et al. 2012)	NA	NA	NA	Autosomal orthologs	No	NA	NA	NA	NA	NA	NA	NA	NA	NA	NA	NA	NA
Dark-eyed junco	Junco hyemalis	Avian ZW	NA	NA	NA	GCA_003829775.1	71317294	female	(Friis et al. 2018)	NA	NA	NA	Z-linked orthologs	No	NA	NA	NA	NA	NA	NA	NA	NA	NA	NA	NA	NA
Great tit	Parus major	Avian ZW	NA	NA	NA	GCF_001522545.3	71365269	male	(Laine et al. 2016)	NA	NA	NA	Z-linked orthologs	No	NA	NA	NA	NA	NA	NA	NA	NA	NA	NA	NA	NA
Eastern garter snake	Thamnophis sirtalis	Caenophidian ZW	NA	NA	NA	GCF_001077635.1	647592	female	(Perry et al. 2018)	Published ZW pairs	Exonerate ZW pairs	Reference for mountain garter snake read mapping	NA	No	NA	NA	NA	NA	NA	(Perry et al. 2018)	NA	NA	NA	NA	NA	(Perry et al. 2018)
Corn snake	Pantherophis guttatus	Caenophidian ZW	NA	NA	NA	GCA_001185365.1	5793	female	(Ullate-Agote et al. 2014)	Published ZW pairs	Exonerate ZW pairs	NA	NA	No	NA	NA	NA	NA	NA	NA	NA	NA	NA	NA	NA	NA
Timber rattlesnake	Crotalus horridus	Caenophidian ZW	NA	NA	NA	GCA_001625485.1	24581	female	(Sanders et al. Unpublished)	Published ZW pairs	Exonerate ZW pairs	NA	NA	No	NA	NA	NA	NA	NA	NA	NA	NA	NA	NA	NA	NA
Okinawa habu	Protobothrops flavoviridis	Caenophidian ZW	NA	NA	NA	GCA_003402635.1	474696	female	(Shibata et al. 2018)	Published ZW pairs	Exonerate ZW pairs	NA	NA	No	NA	NA	NA	NA	NA	NA	NA	NA	NA	NA	NA	NA
Arafura file snake	Acrochordus arafurae	Caenophidian ZW	NA	NA	NA	NA	NA	NA	NA	Published ZW pairs	Published ZW pairs	NA	NA	No	NA	NA	NA	NA	NA	NA	NA	NA	NA	NA	NA	NA
Mamushi	Gloydius blomhoffii	Caenophidian ZW	NA	NA	NA	NA	NA	NA	NA	Published ZW pairs	NA	NA	NA	No	NA	NA	NA	NA	NA	NA	NA	NA	NA	NA	NA	NA
Tiger keelback	Rhabdophis tigrinus tigrinus	Caenophidian ZW	NA	NA	NA	NA	NA	NA	NA	Published ZW pairs	NA	NA	NA	No	NA	NA	NA	NA	NA	NA	NA	NA	NA	NA	NA	NA
Japanese four-lined ratsnake	Elaphe quadrivirgata	Caenophidian ZW	NA	NA	NA	NA	NA	NA	NA	Published ZW pairs	NA	NA	NA	No	NA	NA	NA	NA	NA	NA	NA	NA	NA	NA	NA	NA
Ryuku odd-tooth snake	Lycodon semicarinatus	Caenophidian ZW	NA	NA	NA	NA	NA	NA	NA	Published ZW pairs	NA	NA	NA	No	NA	NA	NA	NA	NA	NA	NA	NA	NA	NA	NA	NA
Monocled cobra	Naja kaouthia	Caenophidian ZW	NA	NA	NA	NA	NA	NA	NA	Published ZW pairs	NA	NA	NA	No	NA	NA	NA	NA	NA	NA	NA	NA	NA	NA	NA	NA
Mainland tiger snake	Notechis scutatus	Caenophidian ZW	NA	NA	NA	GCA_900518725.1	5997050	female	(Edwards et al. 2018)	Syntenic orthologs of sex-linked genes in caenophidians	NA	NA	NA	No	NA	NA	NA	NA	NA	NA	NA	Snake-Lizard	NA	NA	NA	NA
Prairie rattlesnake	Crotalus viridis	Caenophidian ZW	NA	NA	NA	GCA_003400415.2	179897795	male	(Schield et al. 2019)	Syntenic orthologs of sex-linked genes in caenophidians	Exonerate Z-linked orthologs	Reference for pygmy rattlesnake read mapping, scaffold for ordering eastern garter snake contigs	NA	No	NA	NA	NA	NA	NA	NA	NA	NA	NA	NA	NA	NA
