# Supplementary material for: Dosage-sensitive functions in embryonic development drove the survival of genes on sex-specific chromosomes in snakes, birds, and mammals
Source: HighWire-hosted journal article supplement (doi:10.1101/gr.268516.120), 2021-01-21
Supplement: Supplemental_Table_S2.xlsx [file Supplemental_Table_S2.xlsx]

## Sheet: Sheet1
Supplemental Table S2. Published sex-linked genes in caenophidian snakes and python.
	Chromosomal Location			Reference
Gene Name	Human	Chicken	Anolis	(Matsubara et al. 2006)	(Matsubara et al. 2012)	(Vicoso et al. 2013a)	(Rovatsos et al. 2015)	(Matsubara et al. 2016)	(Yin et al. 2016)	(Perry et al. 2018)	(Gamble et al. 2017)
ADARB2	10	2	6	-	-	-	Table S3	-	-	-	-
AMPH	7	2	6	Fig. 5	Fig. 1	-	-	-	Supp. Data 1	-	-
AP2A1	19	-	6	-	-	Dataset S1, Tables S4 & S5 (ENSACAG00000013405)	-	-	Supp. Fig. 32	-	-
ARF1	1	2	6	-	-	Dataset S1 (ENSACAG00000006923)	-	-	-	-	-
ODAD2	10	2	6	-	-	-	Table S3	-	-	-	-
ATP6V0A1	17	27	6	-	Fig. 1	-	-	-	-	-	-
BMI1	10	2	6	-	-	Dataset S1, Tables S4 & S5 (ENSACAG00000023169)	-	-	Supp. Fig. 31	-	-
BRCA1	17	27	6	-	-	Dataset S1 (ENSACAG00000013415)	-	-	-	-	-
CBX1	17	27	6	-	-	Dataset S1 (ENSACAG00000006594)	-	-	-	-	-
CCDC126	7	2	6	Fig. 5 (LOC90693)	Fig. 1	-	-	-	Supp. Data 1	-	-
CCDC127	5	2	6	-	Fig. 1	-	-	-	-	-	-
CDC27	17	27	6	-	-	Dataset S1 (ENSACAG00000017359)	-	-	-	-	-
CDK12	17	27	6	-	-	Dataset S1, Tables S4 & S5 (ENSACAG00000017541,ENSACAG00000023742)	-	-	Supp. Fig. 32 (ENSACAG00000023742)	-	-
CDK13	7	2	6	-	-	-	-	-	Supp. Fig. 30 (ENSACAG00000017597)	-	-
CNTNAP1	17	27	6	-	-	-	-	-	Supp. Fig. 30	-	-
COL1A1	17	AADN04001035.1	6	-	-	Dataset S1 (ENSACAG00000005084)	-	-	-	-	-
COMMD3	10	2	6	-	-	Dataset S1, Tables S4 & S5 (ENSACAG00000009052)	-	-	Supp. Fig. 31	Fig. 3	-
CTNNB1	3	2	GL343224.1	Fig. 5	Fig.1	Dataset S1 (ENSACAG00000004408)	-	Fig. 3	Supp. Data 1	Fig. 3	-
CUL2	10	2	6	-	-	Dataset S1, Tables S4 & S5 (ENSACAG00000000628)	-	-	Supp. Fig. 31	-	-
DCAF7	17	27	6	-	-	Dataset S1 (ENSACAG00000012744)	-	-	-	-	-
DDX42	17	27	6	-	-	Dataset S1 (ENSACAG00000003994)	-	-	-	-	-
DLX3	17	27	6	-	-	Dataset S1 (ENSACAG00000005130)	-	-	-	-	-
DLX4	17	-	6	-	-	Tables S4 & S5 (ENSACAG00000005126)	-	-	-	-	-
DNAJB6	7	2	6	-	-	Dataset S1 (ENSACAG00000011443)	-	-	-	-	-
EFTUD2	17	27	6	-	-	-	-	-	-	-	Table S3
EIF1	17	27	6	-	Fig. 1	-	-	-	Supp. Data 1	-	-
EPC1	10	2	6	-	-	Dataset S1 (ENSACAG00000007015)	-	-	Supp. Fig. 31	-	-
EZH1	17	27	6	-	-	-	-	-	Supp. Fig. 30	-	-
EZH2	7	2	6	-	-	Dataset S1 (ENSACAG00000013910)	-	-	-	-	-
FAM171A2	17	-	6	-	-	Dataset S1, Tables S4 & S5 (ENSACAG00000012203)	-	-	-	-	-
FBXL20	17	27	6	-	-	Dataset S1 (ENSACAG00000017505)	-	-	Supp. Fig. 32	-	-
FUZ	19	-	6	-	-	Dataset S1, Tables S4 & S5 (ENSACAG00000028153)	-	-	Supp. Fig. 32 (ENSACAG00000028153)	-	-
GAD2	10	2	6	Fig. 5	Fig. 1	-	-	-	Supp. Data 1	-	-
GH1	17	27	6	Fig. 5	Fig. 1	-	-	-	-	-	-
GOLGA4	3	2	6	-	-	-	-	-	-	-	Table S3
GORASP1	3	2	6	-	-	Dataset S1 (ENSACAG00000009518)	-	-	-	-	-
HDAC5	17	-	6	-	-	Dataset S1 (ENSACAG00000004207)	-	-	-	-	-
HEXIM1	17	27	6	-	-	Dataset S1, Tables S4 & S5 (ENSACAG00000016321)	-	-	-	-	-
IGF2BP1	17	27	6	-	-	Dataset S1 (ENSACAG00000006199)	-	-	-	-	-
IMMT	2	4	6	-	-	-	Table S3	-	-	-	-
ITGA3	17	27	6	-	-	Dataset S1 (ENSACAG00000026628)	-	-	-	-	-
ITGB1	10	2	6	-	-	-	Table S3	-	-	-	-
JUP	17	27	6	-	-	Dataset S1, Tables S4 & S5 (ENSACAG00000017889)	-	-	-	-	-
KANSL1	17	27	6	-	-	Dataset S1 (ENSACAG00000017346)	-	-	Supp. Fig. 32	-	-
KAT7	17	27	6	Fig. 5 (MYST2)	Fig. 1	Dataset S1 (ENSACAG00000005025)	-	-	Supp. Fig. 32	-	-
KIF5B	10	2	6	-	-	Dataset S1 (ENSACAG00000007071)	-	-	-	-	-
KLF6	10	2	6	Fig. 5	Fig. 1	Dataset S1, Tables S4 & S5 (ENSACAG00000001166)	-	-	Supp. Fig. 31 (ENSACAG00000001166), Supp. Data 1	-	-
KPNB1	17	27	6	-	-	Dataset S1 (ENSACAG00000007097)	-	-	Supp. Fig. 32	-	-
LARP4B	10	2	6	-	-	Dataset S1, Tables S4 & S5 (ENSACAG00000002858)	-	-	-	-	-
LASP1	17	27	6	-	-	Dataset S1, Tables S4 & S5 (ENSACAG00000014046)	-	-	Supp. Fig. 32	-	-
LSM12	17	KQ759560.1	6	-	-	Dataset S1, Tables S4 & S5 (ENSACAG00000004618)	-	-	-	Fig. 3	-
MAPT	17	27	6	-	-	Dataset S1 (ENSACAG00000017319)	-	-	-	-	-
MRPL3	3	2	6	-	Fig. 1	-	-	-	Supp. Data 1	-	-
MSL1	17	27	6	-	-	Dataset S1, Tables S4 & S5 (ENSACAG00000002768)	-	-	Supp. Fig. 32	Fig. 3	-
MYO1D	17	27	6	-	Fig. 1	-	-	-	-	-	-
NFE2L1	17	27	6	-	-	Dataset S1, Tables S4 & S5 (ENSACAG00000006615)	-	-	Supp. Fig. 32	-	-
NMT1	17	27	6	-	-	Dataset S1, Tables S4 & S5 (ENSACAG00000007348)	-	-	Supp. Fig. 32	-	-
NOSIP	19	-	6	-	-	-	-	-	Supp. Data 1	-	-
NPEPPS	17	27	6	-	-	Dataset S1 (ENSACAG00000007242)	-	-	-	-	-
NR1D1	17	27	6	-	-	Dataset S1, Tables S4 & S5 (ENSACAG00000002847)	-	-	-	-	-
NSF	17	27	6	-	-	Dataset S1, Tables S4 & S5 (ENSACAG00000016584)	-	-	-	-	-
PDIA4	7	2	6	-	-	-	-	-	-	-	Table S3
PINX1	8	3	GL343553.1	-	-	-	-	-	-	-	Table S3
PIP4K2A	10	2	6	-	Fig. 1	-	-	-	-	-	-
PIP4K2B	17	27	6	-	-	Dataset S1 (ENSACAG00000013164)	-	-	-	-	-
PRR12	19	-	6	-	-	Dataset S1 (ENSACAG00000027532)	-	-	-	-	-
PSMA2	7	2	6	-	-	Dataset S1 (ENSACAG00000017511)	-	-	-	-	-
PSMD11	17	27	6	-	-	Dataset S1 (ENSACAG00000016508)	-	-	Supp. Fig. 32	-	-
PSMD3	17	27	6	-	-	Dataset S1, Tables S4 & S5 (ENSACAG00000003160)	-	-	Supp. Fig. 32	-	-
PSME3	17	27	6	-	-	Dataset S1 (ENSACAG00000013688)	-	-	Supp. Fig. 30(ENSACAG00000025593)	-	-
PTER	10	2	6	-	Fig. 1	-	-	-	Supp. Data 1	-	-
PTF1A	10	2	6	-	-	-	-	-	Supp. Fig. 31	-	-
RAB5A	3	2	6	Fig. 5	Fig. 1	-	-	-	-	-	-
RARA	17	27	6	-	-	Dataset S1 (ENSACAG00000002413)	-	-	-	-	-
RBM33	7	2	6	-	-	Dataset S1 (ENSACAG00000011035)	-	-	-	-	-
RRAS	19	-	6	-	-	Dataset S1, Tables S4 & S5 (ENSACAG00000013955)	-	-	-	-	-
RUNDC1	17	27	6	-	Fig. 1	-	-	-	Supp. Data 1	-	-
RUNDC3A	17	27	6	-	-	Dataset S1 (ENSACAG00000013955)	-	-	Supp. Fig. 32	-	-
SCAF1	19	-	6	-	-	Dataset S1, Tables S4 & S5 (ENSACAG00000014008)	-	-	Supp. Fig. 32	-	-
SEPTIN7	7	2	6	-	-	Dataset S1 (ENSACAG00000007341)	-	-	-	-	-
SLC25A39	17	27	6	-	-	Dataset S1 (ENSACAG00000017306)	-	-	-	-	-
SNRNP70	19	AADN04013882.1	6	-	-	Dataset S1 (ENSACAG00000013276)	-	-	Supp. Fig. 32	-	-
SOCS7	17	27	6	-	-	Dataset S1, Tables S4 & S5 (ENSACAG00000007418)	-	-	-	-	-
SP2	17	27	6	-	-	Dataset S1, Tables S4 & S5 (ENSACAG00000006793)	-	-	Supp. Fig. 32	-	-
SP4	7	2	6	-	-	-	Table S3	-	Supp. Fig. 31	-	-
SPOP	17	27	6	-	-	Dataset S1 (ENSACAG00000004879)	-	-	-	-	-
SRI	7	2	4	-	Fig. 1	-	-	-	Supp. Data 1	-	-
STAT5B	17	27	6	-	-	Dataset S1, Tables S4 & S5 (ENSACAG00000017951)	-	-	-	-	-
STT3B	3	2	1	-	-	-	-	-	Supp. Fig. 31	-	-
TANC2	17	27	6	-	-	-	Table S3	-	-	-	-
TAX1BP1	7	2	GL343275.1	Fig. 5	Fig. 1	-	-	-	Supp. Data 1	-	-
TLK2	17	27	6	-	-	Dataset S1, Tables S4 & S5 (ENSACAG00000016868)	-	-	-	-	-
TMEM35B	1	23	GL343558.1	-	-	-	-	-	-	-	Table S3 (ZMYM6NB)
TOP2A	17	27	6	-	-	Table S5 (ENSACAG00000001904)	-	-	-	-	-
TRA2A	7	2	6	-	-	Dataset S1 (ENSACAG00000013502)	-	-	-	-	-
TUBG1	17	27	6	Fig. 5	Fig. 1	-	-	-	Supp. Data 1	-	-
UBE2M	19	-	GL343253.1	-	-	Table S6	-	-	-	-	-
UBE2Z	17	27	6	-	-	Dataset S1 (ENSACAG00000006311)	-	-	-	-	-
UBTF	17	AADN04001028.1	6	-	-	Dataset S1 (ENSACAG00000017186)	-	-	-	-	-
UGT2A3	4	-	6	-	-	Dataset S1 (ENSACAG00000009384), Tables S4 & S5 (ENSACAG00000009562)	-	-	-	-	-
WAC	10	2	6	Fig. 5	Fig. 1	Dataset S1 (ENSACAG00000007583)	-	Fig. 4	Supp. Data 1	Fig. 3	-
WDR48	3	2	6	-	-	Dataset S1, Tables S4 & S5 (ENSACAG00000009416)	-	-	-	Fig. 3	-
YTHDC1	4	4	6	-	-	Dataset S1 (ENSACAG00000009697)	-	-	Supp. Fig. 30	-	-
ZBTB47	3	2	6	-	-	-	-	-	Supp. Fig. 31	-	-
ZMYND11	10	2	6	-	-	Dataset S1 (ENSACAG00000002297)	-	-	-	-	-
ZNF652	17	27	6	-	-	Dataset S1 (ENSACAG00000006063)	-	-	-	-	-
