# Supplementary material for: Dosage-sensitive functions in embryonic development drove the survival of genes on sex-specific chromosomes in snakes, birds, and mammals
Source: HighWire-hosted journal article supplement (doi:10.1101/gr.268516.120), 2021-01-21
Supplement: Supplemental_Table_S3.xlsx [file Supplemental_Table_S3.xlsx]

## Sheet: Sheet1
Supplemental Table S3. Ancestral sex-linked genes in caenophidian snakes.
Order	Symbol	Symbol_Source	Ascertainment	Citations	Linkage	Strata	Five pacer viper	Pygmy rattlesnake	Mountan Garter Snake	Multicopy Family	Human Ensembl ID	Human Chromosome	Human Position	Chicken Ensembl ID	Chicken Chromosome	Chicken Position	Lizard Ensembl ID	Lizard Chromosome	Lizard Position	Boa Chromosome	Boa Position	Boa Alignment Length	Prairie Rattlesnake Chromosome	Prairie Rattlesnake Position	Prairie Rattlesnake Alignment Length	Five-pacer Viper Chromosome	Five-pacer Viper Position	Five-pacer Viper Alignment Length	Mainland Tiger Snake Chromosome	Mainland Tiger Snake Position	Mainland Tiger Snake Alignment Length
100001	ZNF282	HGNC:13076	CVI CM012323.1			Colubroidea					ENSG00000170265	7	149195485	ENSGALG00000039048	2	527155	ENSACAG00000006602	GL343332.1	1103615	Scaffold684	1230629	404	CM012323.1	43579	341	scaffold1306	74300	395	ULFQ01000615.1	115492	358
100002	ZNF398	HGNC:18373	CVI CM012323.1			Colubroidea					ENSG00000197024	7	149126416							Scaffold684	157646	184	CM012323.1	43663	161	scaffold1124	189070	175	ULFQ01000615.1	115576	179
100003	TSNARE1	HGNC:26437	CVI CM012323.1			Colubroidea								ENSGALG00000028985	2	531505				Scaffold684	41844	314	CM012323.1	67193	113	scaffold1306	130000	204	ULFQ01000615.1	142124	219
100004	CAMP	HGNC:1472	GGA 2	Vicoso_et_al_2013a:Dataset_S1	ZW Pair	Colubroidea			yes		ENSG00000276293	17	38765689	ENSGALG00000001610	27	4437429	ENSACAG00000013164	6	63106838	Scaffold1982	254474	408	CM012323.1	74117918	404	scaffold592	900759	405	ULFQ01000278.1	367296	370
100005	KLHL18	HGNC:29120	NSC ULFQ01000598.1			Colubroidea					ENSG00000114648	3	47282917	ENSGALG00000005582	2	3994528	ENSACAG00000005482	GL343865.1	112865	Scaffold2409	284347	548	CM012308.1	173517012	361	scaffold260	11712	512	ULFQ01000598.1	48668	489
100006	KIF9	HGNC:16666	NSC ULFQ01000598.1			Colubroidea					ENSG00000088727	3	47228026	ENSGALG00000005517	2	3971607	ENSACAG00000005403	GL343865.1	143438	Scaffold2409	260672	466	CM012308.1	173545331	192	scaffold260	37856	486	ULFQ01000598.1	76695	468
100007	SETD2	HGNC:18420	CVI CM012323.1			Colubroidea					ENSG00000181555	3	47016429	ENSGALG00000042051	2	3915871	ENSACAG00000002296	GL343918.1	47324	Scaffold2409	173522	1717	CM012323.1	105166	1424	scaffold260	84264	1569	ULFQ01000598.1	122068	960
100008	TNFRSF14	HGNC:11912	CVI CM012323.1			Colubroidea								ENSGALG00000044874	2	3910767	ENSACAG00000000094	AAWZ02039691	2049	Scaffold2409	150334	128	CM012323.1	158761	120	scaffold260	152562	145	ULFQ01000372.1	10779	108
100009	CHDSD	CGNC:61486	CVI CM012323.1			Colubroidea								ENSGALG00000043906	2	3906080				Scaffold2409	116294	189	CM012323.1	175259	129	scaffold260	173353	208	ULFQ01000372.1	29860	196
100010	NBEAL2	HGNC:31928	CVI CM012323.1			Colubroidea					ENSG00000160796	3	46979683	ENSGALG00000039120	2	3879950	ENSACAG00000004678	GL344160.1	1068	Scaffold2409	18992	1983	CM012323.1	198501	1799	scaffold260	235660	1879	ULFQ01000372.1	49106	1867
100011	PTH1R	HGNC:9608	CVI CM012323.1			Colubroidea					ENSG00000160801	3	46877746	ENSGALG00000005476	2	3598940	ENSACAG00000004743	GL343687.1	174417	Scaffold898	110510	450	CM012323.1	319269	343	scaffold260	455809	410	ULFQ01000372.1	262784	358
100012	FBXO41	HGNC:29409	BCO Scaffold3721			Colubroidea					ENSG00000163013	2	73254682	ENSGALG00000039477	4	90258099	ENSACAG00000000364	GL343815.1	80491	Scaffold3721	475861	702	PDHV02000125.1	53819	221	scaffold247	328325	653	ULFQ01001422.1	2161	614
100013	CCT7	HGNC:1622	BCO Scaffold3721			Colubroidea					ENSG00000135624	2	73233420	ENSGALG00000016088	4	90271990	ENSACAG00000000398	GL343815.1	33869	Scaffold3721	441712	507	PDHV02000125.1	41355	119	scaffold247	392484	415	ULFQ01013216.1	10	201
100014	PRADC1	HGNC:16047	DAC scaffold230			Colubroidea					ENSG00000135617	2	73228006	ENSGALG00000016089	4	90282321	ENSACAG00000000676	GL343815.1	10724	Scaffold3721	432409	147	PDHV02000406.1	4398	59	scaffold230	240558	122	ULFQ01002849.1	4318	132
100015	SMYD5	HGNC:16258	DAC scaffold230			Colubroidea					ENSG00000135632	2	73214222	ENSGALG00000022920	4	90285101	ENSACAG00000000683	GL343815.1	147	Scaffold3721	414136	325	CM012306.1	39171591	18	scaffold230	218794	231	ULFQ01003436.1	8901	101
100016	VPS16	HGNC:14584	DAC scaffold230			Colubroidea					ENSG00000215305	20	2840703	ENSGALG00000034510	AADN04000623.1	88970	ENSACAG00000000170	GL343838.1	14072	Scaffold3721	382292	542	PDHV02001695.1	936	73	scaffold230	180076	507	ULFQ01003224.1	1434	240
100017	PCED1A	HGNC:16212	CVI CM012323.1			Colubroidea					ENSG00000132635	20	2835314				ENSACAG00000000213	GL343698.1	2618	Scaffold3721	317656	188	CM012323.1	386348	148	scaffold230	116007	187	ULFQ01000008.1	4071356	167
100018	CPXM1	HGNC:15771	NSC ULFQ01000784.1			Colubroidea					ENSG00000088882	20	2794069	ENSGALG00000040759	AADN04000623.1	106099	ENSACAG00000000222	GL343698.1	53176	Scaffold3721	271653	556	CM012310.1	34086862	193	scaffold230	71055	546	ULFQ01000784.1	58007	511
100019	NAT8B	HGNC:30235	CVI CM012323.1			Colubroidea											ENSACAG00000027037	GL343698.1	47647	Scaffold3721	297023	182	CM012323.1	392268	179	scaffold230	93976	182	ULFQ01000784.1	80952	176
100020	NAT8	HGNC:18069	CVI CM012323.1			Colubroidea					ENSG00000144035	2	73640832	ENSGALG00000033857	AADN04000623.1	98705	ENSACAG00000016550	GL343698.1	24670	Scaffold3721	308208	84	CM012323.1	399584	48	scaffold230	101588	48	ULFQ01034565.1	843	98
100021	EBF3	HGNC:19087	BCO Scaffold3721			Colubroidea											ENSACAG00000000329	GL343698.1	296840	Scaffold3721	155357	88	CM012307.1	54748720	39	scaffold1437	371176	86	ULFQ01000035.1	1841713	60
100022	EBF4	HGNC:29278	BCO Scaffold3721			Colubroidea					ENSG00000088881	20	2692878	ENSGALG00000037463	AADN04004644.1	6107	ENSACAG00000007938	GL344110.1	1207	Scaffold3721	79940	430	CM012307.1	54389941	392	scaffold1437	165737	442	ULFQ01000035.1	1841719	335
100023	RNF145	HGNC:20853	BCO Scaffold3721			Colubroidea								ENSGALG00000039181	AADN04003971.1	509	ENSACAG00000005930	GL343762.1	181365	Scaffold3721	56271	366	CM012307.1	54324622	219	scaffold645	121056	286	ULFQ01000170.1	115020	215
100024	TMIE	HGNC:30800	CVI CM012323.1			Colubroidea					ENSG00000181585	3	46694528	ENSGALG00000005443	2	3314718	ENSACAG00000005156	GL343449.1	343348	Scaffold898	366091	81	CM012323.1	515336	93	scaffold528	259419	104	ULFQ01019113.1	1221	51
100025	ALS2CL	HGNC:20605	CVI CM012323.1			Colubroidea					ENSG00000178038	3	46668997	ENSGALG00000005430	2	3260213	ENSACAG00000005158	GL343449.1	364842	Scaffold898	391200	460	CM012323.1	525526	399	scaffold528	210536	442	ULFQ01000189.1	1371390	365
100026	CCDC12	HGNC:28332	CVI CM012323.1			Colubroidea					ENSG00000160799	3	46921726	ENSGALG00000005487	2	3843130	ENSACAG00000004727	GL343687.1	34957	Scaffold898	20926	130	CM012323.1	609957	92	scaffold260	368343	104	ULFQ01000372.1	187300	107
100027	JMJD4	HGNC:25724	CVI CM012323.1			Colubroidea					ENSG00000081692	1	227730425	ENSGALG00000005417	2	3250079	ENSACAG00000005198	GL343449.1	430572	Scaffold898	430720	386	CM012323.1	634862	328	scaffold528	195142	370	ULFQ01000189.1	1357600	379
100028	SNAP47	HGNC:30669	CVI CM012323.1			Colubroidea					ENSG00000143740	1	227728539	ENSGALG00000005412	2	3226148	ENSACAG00000005214	GL343449.1	447546	Scaffold898	450986	328	CM012323.1	653765	264	scaffold528	170164	301	ULFQ01000189.1	1331733	293
100029	WNT9A	HGNC:12778	CVI CM012323.1			Colubroidea					ENSG00000143816	1	227918656	ENSGALG00000005401	2	2612356	ENSACAG00000005216	GL343853.1	113172	Scaffold898	693244	318	CM012323.1	841681	232	scaffold915	15095	327	ULFQ01000185.1	383680	187
100030	WNT3A	HGNC:15983	CVI CM012323.1			Colubroidea					ENSG00000154342	1	228007051	ENSGALG00000042657	2	2498228	ENSACAG00000006935	6	3404801	Scaffold898	756280	333	CM012323.1	890527	329	scaffold915	107325	316	ULFQ01000189.1	1032235	319
100031	C1orf35	HGNC:19032	CVI CM012323.1			Colubroidea					ENSG00000143793	1	228100726	ENSGALG00000037519	2	2389879	ENSACAG00000006899	6	3265477	Scaffold898	546070	161	CM012323.1	984565	75	scaffold915	238370	124	ULFQ01000189.1	937132	104
100032	GJC2	HGNC:17494	CVI CM012323.1			Colubroidea					ENSG00000198835	1	228149852	ENSGALG00000005331	2	2340128	ENSACAG00000006876	6	3167105	Scaffold898	1030696	370	CM012323.1	1084325	358	scaffold915	325833	356	ULFQ01000189.1	846384	361
100033	IBA57	HGNC:27302	CVI CM012323.1			Colubroidea					ENSG00000181873	1	228165815	ENSGALG00000005328	2	2332065	ENSACAG00000006874	6	3159478	Scaffold898	1036939	169	CM012323.1	1094487	186	scaffold915	335965	196	ULFQ01000189.1	835908	195
100034	GUK1	HGNC:4693	NSC ULFQ01000189.1			Colubroidea					ENSG00000143774	1	228139962	ENSGALG00000005336	2	2373286	ENSACAG00000006879	6	3238928	Scaffold898	965716	135	CM012308.1	10447646	41	scaffold915	264218	149	ULFQ01002201.1	2611	150
100035	MRPL55	HGNC:16686	NSC ULFQ01000189.1			Colubroidea					ENSG00000162910	1	228106679	ENSGALG00000038820	2	2388401	ENSACAG00000006897	6	3256681	Scaffold898	951125	77	CM012308.1	10095126	32	scaffold915	249333	61	ULFQ01000189.1	791596	64
100036	ARF1	HGNC:652	Published as ancestral sex-linked	Vicoso_et_al_2013a:Dataset_S1(ENSACAG00000006923)	ZW Pair	Colubroidea		yes			ENSG00000108094	10	35008551	ENSGALG00000007095	2	13043021	ENSACAG00000000628	6	10864238	Scaffold1329	1015568	726	CM012323.1	13006743	714	scaffold701	644794	728	ULFQ01000043.1	4999087	725
100037	OBSCN	HGNC:15719	CVI CM012323.1			Colubroidea					ENSG00000154358	1	228208130	ENSGALG00000032534	2	2110152	ENSACAG00000006865	6	2933697	Scaffold9982	488791	3465	CM012323.1	1140233	3734	scaffold1941	2408	3320	ULFQ01000189.1	647017	3665
100038	CYP8B1	HGNC:2653	NSC ULFQ01000189.1			Colubroidea					ENSG00000180432	3	42856005	ENSGALG00000033511	2	2104464	ENSACAG00000006794	6	2826826	Scaffold9982	460738	239	CM012309.1	61902332	222	scaffold418	9892	216	ULFQ01000189.1	523467	239
100039	CCDC13	HGNC:26358	CVI CM012323.1			Colubroidea					ENSG00000244607	3	42708269	ENSGALG00000005303	2	2062033	ENSACAG00000006787	6	2779775	Scaffold9982	408377	409	CM012323.1	1422236	348	scaffold56	535628	409	ULFQ01000189.1	466085	253
100040	HHATL	HGNC:13242	NSC ULFQ01000189.1			Colubroidea					ENSG00000010282	3	42692663	ENSGALG00000005297	2	2044118	ENSACAG00000006760	6	2742818	Scaffold9982	380082	344	CM012307.1	63601967	276	scaffold56	497474	383	ULFQ01000189.1	432728	346
100041	KLHL40	HGNC:30372	NSC ULFQ01000189.1			Colubroidea					ENSG00000157119	3	42685519	ENSGALG00000005292	2	2030549	ENSACAG00000006735	6	2721074	Scaffold9982	363018	523	CM012307.1	63622051	512	scaffold56	477694	481	ULFQ01000189.1	398592	511
100042	ZBTB47	HGNC:26955	Published as ancestral sex-linked	Yin_et_al_2016:Supp_Fig_31	ZW Pair	Colubroidea	yes		yes		ENSG00000136448	17	45051610	ENSGALG00000000857	27	1496712	ENSACAG00000007348	6	64771979	Scaffold1464	191683	449	CM012323.1	78521940	427	scaffold140	301326	444	ULFQ01000201.1	864961	439
100043	NKTR	HGNC:7833	NSC ULFQ01000189.1			Colubroidea					ENSG00000114857	3	42600614	ENSGALG00000030268	2	1957552	ENSACAG00000006683	6	2642798	Scaffold9982	289212	992	CM012307.1	63661556	915	scaffold56	398861	873	ULFQ01000189.1	327424	874
100044	SEC22C	HGNC:16828	NSC ULFQ01000189.1			Colubroidea					ENSG00000093183	3	42547969	ENSGALG00000005268	2	1911806	ENSACAG00000006664	6	2611661	Scaffold9982	270873	243	CM012307.1	63733868	91	scaffold56	376260	185	ULFQ01000189.1	298025	191
100045	VIPR1	HGNC:12694	CVI CM012323.1			Colubroidea					ENSG00000114812	3	42489299	ENSGALG00000005259	2	1742703	ENSACAG00000006506	6	2460335	Scaffold9982	191042	285	CM012323.1	1581469	180	scaffold56	321003	283	ULFQ01000189.1	47229	296
100046	ADCYAP1R1	HGNC:242	CVI CM012323.1			Colubroidea					ENSG00000078549	7	31052461	ENSGALG00000005223	2	1391174	ENSACAG00000006137	6	2171773	Scaffold2836	31200	436	CM012323.1	1650056	373	scaffold56	90929	424	ULFQ01000189.1	27072	429
100047	GHRHR	HGNC:4266	CVI CM012323.1			Colubroidea					ENSG00000106128	7	30938669	ENSGALG00000005212	2	1166457	ENSACAG00000005849	6	1946687	Scaffold2836	282953	285	CM012323.1	1810938	62	scaffold334	109049	228	ULFQ01000402.1	182449	167
100048	AQP1	HGNC:633	NSC ULFQ01000402.1			Colubroidea					ENSG00000240583	7	30911694	ENSGALG00000005209	2	1115116	ENSACAG00000005808	6	1886100	Scaffold2836	329848	217	CM012307.1	94503812	160	scaffold334	172170	215	ULFQ01000402.1	123065	216
100049	MINDY4	HGNC:21916	CVI CM012323.1			Colubroidea					ENSG00000106125	7	30771417	ENSGALG00000005188	2	998427	ENSACAG00000005775	6	1766585	Scaffold2836	394441	360	CM012323.1	1926482	231	scaffold334	260997	352	ULFQ01000402.1	1196	293
100050	LOC420419	CGNC:51255	CVI CM012323.1			Colubroidea								ENSGALG00000005884	2	4744656	ENSACAG00000005120	6	926243	Scaffold1468	477330	577	CM012323.1	2086418	462	scaffold334	505511	519	ULFQ01000110.1	398443	452
100051	ACAA1	HGNC:82	CVI CM012323.1			Colubroidea					ENSG00000060971	3	38103129	ENSGALG00000005860	2	4735739	ENSACAG00000005137	6	1012812	Scaffold1468	461876	355	CM012323.1	2148603	320	scaffold334	569506	302	ULFQ01000110.1	372420	350
100052	DLEC1	HGNC:2899	CVI CM012323.1			Colubroidea					ENSG00000008226	3	38039205	ENSGALG00000005826	2	4698534	ENSACAG00000005201	6	1026174	Scaffold1468	411954	1042	CM012323.1	2170964	660	scaffold334	587328	929	ULFQ01000110.1	308547	898
100053	PLCD1	HGNC:9060	CVI CM012323.1			Colubroidea					ENSG00000187091	3	38007496	ENSGALG00000005805	2	4635397	ENSACAG00000005221	6	1082904	Scaffold1468	354438	577	CM012323.1	2248998	450	scaffold334	714042	561	ULFQ01000110.1	221197	523
100054	VILL	HGNC:30906	CVI CM012323.1			Colubroidea					ENSG00000136059	3	37988059	ENSGALG00000005763	2	4612936	ENSACAG00000005301	6	1133594	Scaffold1468	323658	692	CM012323.1	2311670	499	scaffold334	768634	463	ULFQ01000110.1	69708	598
100055	CTDSPL	HGNC:16890	CVI CM012323.1			Colubroidea					ENSG00000144677	3	37861960	ENSGALG00000005710	2	4515467	ENSACAG00000005539	6	1195251	Scaffold1468	237379	251	CM012323.1	2366309	241	scaffold1308	176880	247	ULFQ01000110.1	15560	237
100056	GARS1	HGNC:4162	CVI CM012323.1			Colubroidea					ENSG00000106105	7	30594681	ENSGALG00000005694	2	4374027	ENSACAG00000005601	6	1391616	Scaffold1468	161659	626	CM012323.1	2480722	515	scaffold1308	80109	609	ULFQ01000469.1	42548	623
100057	CRHR2	HGNC:2358	CVI CM012323.1			Colubroidea					ENSG00000106113	7	30651943	ENSGALG00000005657	2	4233062	ENSACAG00000005741	6	1444869	Scaffold1468	40930	327	CM012323.1	2566670	342	scaffold1711	568554	263	ULFQ01000469.1	129531	343
100058	SLC22A13	HGNC:8494	CVI CM012323.1			Colubroidea					ENSG00000172940	3	38265812	ENSGALG00000005934	2	4974034	ENSACAG00000024540	6	766807	Scaffold1468	681041	226	CM012323.1	2629863	179	scaffold1535	81533	156	ULFQ01000110.1	684148	187
100059	MYD88	HGNC:7562	CVI CM012323.1			Colubroidea					ENSG00000172936	3	38138478	ENSGALG00000005947	2	4841182	ENSACAG00000009971	6	882558	Scaffold1468	579778	187	CM012323.1	2852572	92	scaffold993	118072	226	ULFQ01000110.1	564307	221
100060	OXSR1	HGNC:8508	CVI CM012323.1			Colubroidea					ENSG00000172939	3	38165089	ENSGALG00000005979	2	4864672	ENSACAG00000009859	6	783388	Scaffold1468	619790	470	CM012323.1	2886991	440	scaffold993	10817	478	ULFQ01000110.1	514603	468
100061	SLC22A14	HGNC:8495	DAC scaffold993			Colubroidea					ENSG00000144671	3	38282294							Scaffold1468	691353	44				scaffold993	2529	33
100062	SLC22A13	HGNC:8494	CVI CM012323.1			Colubroidea					ENSG00000172940	3	38265812	ENSGALG00000006018	2	4957362	ENSACAG00000024540	6	766807	Scaffold1468	681041	226	CM012323.1	2946039	191	scaffold1535	81533	142	ULFQ01000110.1	684148	187
100063	SLC22A13	HGNC:8494	CVI CM012323.1			Colubroidea					ENSG00000172940	3	38265812	ENSGALG00000005934	2	4974034	ENSACAG00000009777	6	737567	Scaffold1468	707968	369	CM012323.1	2946117	292	scaffold1535	59622	324	ULFQ01000110.1	684316	237
100064	XIRP1	HGNC:14301	CVI CM012323.1			Colubroidea					ENSG00000168334	3	39183210	ENSGALG00000006025	2	4992188	ENSACAG00000009771	6	716883	Scaffold1468	738918	1155	CM012323.1	3048702	1175	scaffold1535	28577	1165	ULFQ01000110.1	739969	1135
100065	CSRNP1	HGNC:14300	CVI CM012323.1			Colubroidea					ENSG00000144655	3	39141855	ENSGALG00000027905	2	5277138	ENSACAG00000009756	6	414568	Scaffold1468	968894	453	CM012323.1	3272049	411	scaffold619	1900540	379	ULFQ01000110.1	1054277	351
100066	TTC21A	HGNC:30761	CVI CM012323.1			Colubroidea					ENSG00000168026	3	39107704				ENSACAG00000009574	6	372487	Scaffold1468	990902	1166	CM012323.1	3293217	1140	scaffold619	1925925	1114	ULFQ01000110.1	1087407	1117
100067	GORASP1	HGNC:16769	Published as ancestral sex-linked	Vicoso_et_al_2013a:Dataset_S1(ENSACAG00000009518)	ZW Pair	Colubroidea			yes		ENSG00000161682	17	44353215				ENSACAG00000012203	6	64089842	Scaffold318	185556	707	CM012323.1	78127647	694	scaffold140	718912	696	ULFQ01000201.1	409591	695
100068	WDR48	HGNC:30914	Published as ancestral sex-linked	Vicoso_et_al_2013a:Table_S4,Table_S5(ENSACAG00000009416);Perry_et_al_2018:Fig_3	ZW Pair	Colubroidea		yes	yes		ENSG00000131747	17	40388516	ENSGALG00000003922	27	4838538	ENSACAG00000001904	6	70009033	Scaffold751	3342485	1128	CM012323.1	83587054	1041	scaffold328	390347	1045	ULFQ01000426.1	172252	919
100069	SCN5A	HGNC:10593	CVI CM012323.1			Colubroidea					ENSG00000183873	3	38548057							Scaffold1468	1279786	1341	CM012323.1	3506521	1306	scaffold861	99589	1293	ULFQ01000110.1	1296747	1279
100070	SCN10A	HGNC:10582	CVI CM012323.1			Colubroidea					ENSG00000185313	3	38696807	ENSGALG00000006072	2	5408222	ENSACAG00000009381	6	204897	Scaffold1468	1158739	1395	CM012323.1	3506536	1194	scaffold861	99616	1114	ULFQ01000110.1	1210133	1218
100071	SCN11A	HGNC:10583	NSC ULFQ01000110.1			Colubroidea					ENSG00000168356	3	38845769							Scaffold1468	1158745	659	CM012306.1	133341439	690	scaffold372	1544131	702	ULFQ01000110.1	1296831	680
100072	EXOG	HGNC:3347	CVI CM012323.1			Colubroidea					ENSG00000157036	3	38496127	ENSGALG00000006153	2	5739592	ENSACAG00000009138	GL343530.1	275740	Scaffold1468	1577340	253	CM012323.1	4179001	244	scaffold738	42775	247	ULFQ01000110.1	1901296	248
100073	ACVR2B	HGNC:174	CVI CM012323.1			Colubroidea					ENSG00000114739	3	38453851	ENSGALG00000006158	2	5768485	ENSACAG00000009033	GL343530.1	318510	Scaffold1468	1615446	489	CM012323.1	4220765	421	scaffold738	82648	450	ULFQ01000110.1	1938515	448
100074	XYLB	HGNC:12839	CVI CM012323.1			Colubroidea					ENSG00000093217	3	38346760	ENSGALG00000006173	2	6129976	ENSACAG00000012183	6	3728750	Scaffold8817	60120	421	CM012323.1	4411078	245	scaffold50	3014219	370	ULFQ01000110.1	2321998	364
100075	C9orf152	HGNC:31455	CVI CM012323.1			Colubroidea					ENSG00000188959	9	110190048	ENSGALG00000023454	2	6221209	ENSACAG00000012180	6	3835712	Scaffold8817	159436	95	CM012323.1	4612987	58	scaffold50	2990705	36	ULFQ01000110.1	2519926	23
100076	NUB1	HGNC:17623	CVI CM012323.1			Colubroidea					ENSG00000013374	7	151341699	ENSGALG00000006181	2	6230515	ENSACAG00000012076	6	3842832	Scaffold8817	177675	514	CM012323.1	4660002	461	scaffold50	2964331	506	ULFQ01000110.1	2531365	503
100077	WDR86	HGNC:28020	CVI CM012323.1			Colubroidea					ENSG00000187260	7	151375909	ENSGALG00000019690	2	6249678	ENSACAG00000002245	6	3890653	Scaffold8817	200080	348	CM012323.1	4688128	303	scaffold50	2930470	345	ULFQ01000110.1	2558780	344
100078	RHEB	HGNC:10011	CVI CM012323.1			Colubroidea					ENSG00000106615	7	151466012	ENSGALG00000039880	2	6288185	ENSACAG00000002265	6	3956128	Scaffold8817	253091	178	CM012323.1	4767440	178	scaffold50	2853647	178	ULFQ01000110.1	2650203	177
100079	PRKAG2	HGNC:9386	CVI CM012323.1			Colubroidea					ENSG00000106617	7	151556111	ENSGALG00000006219	2	6325515	ENSACAG00000002337	6	3990600	Scaffold8817	290759	474	CM012323.1	4805512	436	scaffold50	2620347	453	ULFQ01000110.1	2691673	466
100080	GALNT11	HGNC:19875	CVI CM012323.1			Colubroidea					ENSG00000178234	7	152025674	ENSGALG00000006233	2	6550020	ENSACAG00000014168	6	4229655	Scaffold6083	26770	554	CM012323.1	5045391	511	scaffold50	2538983	514	ULFQ01000110.1	2969360	535
100081	GALNTL5	HGNC:21725	CVI CM012323.1			Colubroidea					ENSG00000106648	7	151956379							Scaffold6083	29898	76	CM012323.1	5047218	107	scaffold50	2552916	79	ULFQ01000110.1	2970712	82
100082	KMT2C	HGNC:13726	CVI CM012323.1			Colubroidea					ENSG00000055609	7	152134922	ENSGALG00000032600	2	6583540	ENSACAG00000014195	6	4259531	Scaffold6083	46784	3526	CM012323.1	5069499	3232	scaffold50	2408255	3311	ULFQ01000110.1	2993809	3320
100083	BAGE2	HGNC:15723	CVI CM012323.1			Colubroidea					ENSG00000284573	CHR_HG2291_PATCH	18249130							Scaffold6083	127672	24	CM012323.1	5146424	28	scaffold50	2460186	28	ULFQ01000110.1	2760785	29
100084	XRCC2	HGNC:12829	CVI CM012323.1			Colubroidea					ENSG00000196584	7	152644779	ENSGALG00000026865	2	6803388	ENSACAG00000010622	6	4502176	Scaffold6083	235638	204	CM012323.1	5291588	194	scaffold908	1046958	199	ULFQ01000110.1	3181090	187
100085	ACTR3B	HGNC:17256	CVI CM012323.1			Colubroidea					ENSG00000133627	7	152759749	ENSGALG00000006292	2	6843705	ENSACAG00000010629	6	4522009	Scaffold6083	252419	390	CM012323.1	5336990	380	scaffold908	988881	380	ULFQ01000110.1	3203351	382
100086	ACTR3C	HGNC:37282	CVI CM012323.1			Colubroidea					ENSG00000106526	7	150243916	ENSGALG00000006292	2	6843705	ENSACAG00000010629	6	4522009	Scaffold6083	252419	390	CM012323.1	5343431	374	scaffold908	988881	373	ULFQ01000110.1	3203351	382
100087	DPP6	HGNC:3010	CVI CM012323.1			Colubroidea					ENSG00000130226	7	153887097	ENSGALG00000041791	2	7515891	ENSACAG00000010707	6	5167105	Scaffold94	484505	687	CM012323.1	6011616	675	scaffold908	123474	652	ULFQ01000267.1	206086	605
100088	PAXIP1	HGNC:8624	CVI CM012323.1			Colubroidea					ENSG00000157212	7	154943687	ENSGALG00000036064	2	7696079	ENSACAG00000010905	6	5437876	Scaffold94	715547	875	CM012323.1	6245145	853	scaffold908	72750	834	ULFQ01000267.1	143044	872
100089	HTR5A	HGNC:5300	CVI CM012323.1			Colubroidea					ENSG00000157219	7	155070324	ENSGALG00000006362	2	7746715	ENSACAG00000010972	6	5482249	Scaffold94	708917	297	CM012323.1	6292065	303	scaffold908	47094	293	ULFQ01000267.1	114238	285
100090	INSIG1	HGNC:6083	CVI CM012323.1			Colubroidea					ENSG00000186480	7	155297776	ENSGALG00000017394	2	7860096	ENSACAG00000010997	6	5579862	Scaffold94	850987	232	CM012323.1	6411538	226	scaffold1548	75904	227	ULFQ01000143.1	2290593	229
100091	EN2	HGNC:3343	CVI CM012323.1			Colubroidea					ENSG00000164778	7	155458129	ENSGALG00000041295	2	7907138	ENSACAG00000011018	6	5706524	Scaffold94	580813	189	CM012323.1	6506060	100	scaffold1548	168295	151	ULFQ01000143.1	2185134	181
100092	CNPY1	HGNC:27786	CVI CM012323.1			Colubroidea					ENSG00000146910	7	155474206				ENSACAG00000011000	6	5774071	Scaffold94	977382	134	CM012323.1	6569923	147	scaffold1548	232301	84	ULFQ01000143.1	2093707	119
100093	RBM33	HGNC:27223	Published as ancestral sex-linked	Vicoso_et_al_2013a:Dataset_S1(ENSACAG00000011035)	ZW Pair	Colubroidea		yes	yes		ENSG00000274211	17	38352228	ENSGALG00000040658	27	4097144	ENSACAG00000007418	6	73953671	Scaffold62	1141541	336	CM012323.1	87635642	334	scaffold1010	1315605	346	ULFQ01000030.1	7195783	332
100094	SHH	HGNC:10848	CVI CM012323.1			Colubroidea					ENSG00000164690	7	155799986	ENSGALG00000006379	2	8112394	ENSACAG00000011060	6	5935657	Scaffold94	1140433	354	CM012323.1	6937182	356	scaffold153	238028	351	ULFQ01000143.1	1867045	353
100095	RNF32	HGNC:17118	CVI CM012323.1			Colubroidea					ENSG00000105982	7	156640281	ENSGALG00000006387	2	8448664	ENSACAG00000011088	6	6278204	Scaffold94	1481144	288	CM012323.1	7271176	255	scaffold849	2186161	272	ULFQ01000143.1	1437850	264
100096	LMBR1	HGNC:13243	CVI CM012323.1			Colubroidea					ENSG00000105983	7	156668946	ENSGALG00000030379	2	8467685	ENSACAG00000011102	6	6301785	Scaffold94	1501734	466	CM012323.1	7295580	457	scaffold849	2123030	457	ULFQ01000143.1	1359574	462
100097	NOM1	HGNC:13244	CVI CM012323.1			Colubroidea					ENSG00000146909	7	156949723	ENSGALG00000006437	2	8548792	ENSACAG00000011192	6	6370785	Scaffold94	1577153	490	CM012323.1	7376473	481	scaffold849	2077547	495	ULFQ01000143.1	1315461	478
100098	MNX1	HGNC:4979	CVI CM012323.1			Colubroidea					ENSG00000130675	7	156994051	ENSGALG00000041154	2	8571387				Scaffold94	1477685	205	CM012323.1	7399468	186	scaffold849	2061331	185	ULFQ01000143.1	1302099	198
100099	UBE3C	HGNC:16803	CVI CM012323.1			Colubroidea					ENSG00000009335	7	157138913	ENSGALG00000006461	2	8614944	ENSACAG00000011224	6	6464267	Scaffold1630	2422764	1039	CM012323.1	7451711	1019	scaffold849	1955053	1020	ULFQ01000143.1	1177899	1021
100100	DNAJB6	HGNC:14888	Published as ancestral sex-linked	Vicoso_et_al_2013a:Dataset_S1(ENSACAG00000011443)	ZW Pair	Colubroidea			yes		ENSG00000186834	17	45148502	ENSGALG00000041926	27	1524105	ENSACAG00000016321	6	64978945	Scaffold1464	321661	205	CM012323.1	78768112	190	scaffold140	176605	166	ULFQ01000201.1	1026389	203
100101	PTPRN2	HGNC:9677	CVI CM012323.1			Colubroidea					ENSG00000155093	7	157539056	ENSGALG00000030054	2	8821485	ENSACAG00000011694	6	6740988	Scaffold1630	1484087	669	CM012323.1	7735634	662	scaffold849	1231340	640	ULFQ01000143.1	276761	613
100102	NCAPG2	HGNC:21904	CVI CM012323.1			Colubroidea					ENSG00000146918	7	158631311	ENSGALG00000006525	2	9476883	ENSACAG00000011704	6	7299032	Scaffold1630	1616526	616	CM012323.1	8463988	495	scaffold849	996802	466	ULFQ01000143.1	150968	498
100103	ESYT2	HGNC:22211	CVI CM012323.1			Colubroidea					ENSG00000117868	7	158730995	ENSGALG00000006542	2	9522054	ENSACAG00000010746	GL344095.1	15620	Scaffold1630	1535308	725	CM012323.1	8520543	724	scaffold849	909721	732	ULFQ01000143.1	60554	674
100104	DYNC2I1	HGNC:21862	CVI CM012323.1			Colubroidea					ENSG00000126870	7	158856578	ENSGALG00000006558	2	9595575	ENSACAG00000002239	6	7330687	Scaffold1630	1499731	648	CM012323.1	8577864	606	scaffold849	872375	621	ULFQ01000143.1	19052	588
100105	VIPR2	HGNC:12695	CVI CM012323.1			Colubroidea					ENSG00000106018	7	159028175	ENSGALG00000006575	2	9667074	ENSACAG00000002292	6	7384754	Scaffold1630	1428698	312	CM012323.1	8664001	266	scaffold849	778851	280	ULFQ01000337.1	8808	261
100106	ZMYND11	HGNC:16966	Published as ancestral sex-linked	Vicoso_et_al_2013a:Dataset_S1(ENSACAG00000002297)	ZW Pair	Colubroidea		yes			ENSG00000105866	7	21428034	ENSGALG00000039454	2	30491275	ENSACAG00000014193	6	29757717	Scaffold403	914068	659	CM012323.1	33937626	639	scaffold1235	619214	639	ULFQ01000097.1	1280621	628
100107	DIP2C	HGNC:29150	CVI CM012323.1			Colubroidea					ENSG00000151240	10	274190	ENSGALG00000006652	2	9958497	ENSACAG00000002493	6	7625826	Scaffold1630	980449	1612	CM012323.1	9048177	1609	scaffold849	152978	1628	ULFQ01000337.1	380971	1522
100108	LARP4B	HGNC:28987	Published as ancestral sex-linked	Vicoso_et_al_2013a:Dataset_S1,Table_S4,Table_S5(ENSACAG00000002858)	ZW Pair	Colubroidea		yes			ENSG00000065883	7	39949646	ENSGALG00000043243	2	50062031	ENSACAG00000017597	6	48864614	Scaffold1029	1525318	1140	CM012323.1	56485349	1047	scaffold136	590956	1019	ULFQ01000067.1	1284072	1001
100109	GTPBP4	HGNC:21535	CVI CM012323.1			Colubroidea					ENSG00000107937	10	988019	ENSGALG00000006703	2	10410222	ENSACAG00000002943	6	8095733	Scaffold1630	859817	540	CM012323.1	9501822	522	scaffold849	16016	544	ULFQ01000183.1	397333	544
100110	IDI1	HGNC:5387	CVI CM012323.1			Colubroidea					ENSG00000067064	10	1039152	ENSGALG00000006723	2	10422464	ENSACAG00000003142	6	8112544	Scaffold1630	852546	203	CM012323.1	9519368	200	scaffold849	8634	206	ULFQ01000183.1	424718	203
100111	WDR37	HGNC:31406	CVI CM012323.1			Colubroidea					ENSG00000047056	10	1049538	ENSGALG00000006749	2	10437528	ENSACAG00000003155	6	8123987	Scaffold1630	791123	483	CM012323.1	9559876	481	scaffold1039	866316	481	ULFQ01000183.1	452743	480
100112	ADARB2	HGNC:227	Published as ancestral sex-linked	Rovatsos_et_al_2015:Table_S3	Z-Linked	Colubroidea					ENSG00000185736	10	1177318	ENSGALG00000006797	2	10521952	ENSACAG00000003231	6	8204506	Scaffold1630	376704	705	CM012323.1	9638136	657	scaffold1039	495669	661	ULFQ01000183.1	545072	685
100113	PFKP	HGNC:8878	CVI CM012323.1			Colubroidea					ENSG00000067057	10	3066333	ENSGALG00000006939	2	11417061	ENSACAG00000008018	6	9232582	Scaffold933	275123	711	CM012323.1	10990938	701	scaffold128	1387878	703	ULFQ01000043.1	7384505	681
100114	PITRM1	HGNC:17663	CVI CM012323.1			Colubroidea					ENSG00000107959	10	3137728	ENSGALG00000007036	2	11459556	ENSACAG00000008286	6	9304416	Scaffold933	339461	875	CM012323.1	11042535	847	scaffold128	1350013	848	ULFQ01000043.1	7341136	813
100115	KLF6	HGNC:2235	Published as ancestral sex-linked	Matsubara_et_al_2006:Fig_5; Matsubara_et_al_2012:Fig_1; Vicoso_et_al_2013a:Dataset_S1,Table_S4,Table_S5(ENSACAG00000001166); Yin_et_al_2016:Supp_Fig_31,Supp_Data_1(ENSACAG00000001166)	ZW Pair	Colubroidea	yes	yes	yes		ENSG00000005884	17	50055968	ENSGALG00000032702	27	3186222	ENSACAG00000005508	6	77195620	Scaffold932	1913942	749	CM012323.1	91167634	633	scaffold828	1780	455	ULFQ01000030.1	3544174	695
100116	FZD8	HGNC:4046	CVI CM012323.1			Colubroidea					ENSG00000177283	10	35638249	ENSGALG00000039999	2	12831430	ENSACAG00000001137	6	10678703	Scaffold1329	805331	532	CM012323.1	12742694	538	scaffold701	403532	538	ULFQ01000043.1	5267132	537
100117	GJD4	HGNC:23296	CVI CM012323.1			Colubroidea					ENSG00000177291	10	35605410	ENSGALG00000007065	2	12849410	ENSACAG00000001121	6	10693323	Scaffold1329	839098	171	CM012323.1	12792405	164	scaffold701	445071	165	ULFQ01000043.1	5227593	148
100118	CCNY	HGNC:23354	CVI CM012323.1			Colubroidea					ENSG00000108100	10	35247025	ENSGALG00000007076	2	12867236	ENSACAG00000001075	6	10702877	Scaffold1329	847676	331	CM012323.1	12801080	321	scaffold701	454057	320	ULFQ01000043.1	5108884	320
100119	CREM	HGNC:2352	CVI CM012323.1			Colubroidea					ENSG00000095794	10	35126791	ENSGALG00000007082	2	13001322	ENSACAG00000000947	6	10823012	Scaffold1329	972662	290	CM012323.1	12969353	280	scaffold701	590541	299	ULFQ01000043.1	5062082	301
100120	CUL2	HGNC:2552	Published as ancestral sex-linked	Vicoso_et_al_2013a:Dataset_S1,Table_S4,Table_S5(ENSACAG00000000628); Yin_et_al_2016:Supp_Fig_31	ZW Pair	Colubroidea	yes		yes		ENSG00000108309	17	44308413	ENSGALG00000026518	27	3172860	ENSACAG00000017290	6	66863146	Scaffold751	918895	415	CM012323.1	80790861	410	scaffold106	69902	407	ULFQ01000121.1	2854466	409
100121	PARD3	HGNC:16051	CVI CM012323.1			Colubroidea					ENSG00000148498	10	34109560	ENSGALG00000007125	2	13135663	ENSACAG00000000686	6	11025410	Scaffold1329	1102005	1190	CM012323.1	13139562	1149	scaffold900	63010	1112	ULFQ01000043.1	4296440	1154
100122	NRP1	HGNC:8004	CVI CM012323.1			Colubroidea					ENSG00000099250	10	33177492	ENSGALG00000007140	2	13886401	ENSACAG00000006518	6	12050085	Scaffold1329	2030951	793	CM012323.1	14281383	791	scaffold1454	51614	477	ULFQ01000043.1	3505206	771
100123	ITGB1	HGNC:6153	Published as ancestral sex-linked	Rovatsos_et_al_2015:Table_S3	Z-Linked	Colubroidea					ENSG00000150093	10	32900319	ENSGALG00000007145	2	14045947	ENSACAG00000006788	6	12274686	Scaffold1329	2243429	748	CM012323.1	14503755	721	scaffold572	156175	736	ULFQ01000043.1	3381517	734
100124	CCDC7	HGNC:26533	CVI CM012323.1			Colubroidea											ENSACAG00000029136	6	12328742	Scaffold1329	2273471	310	CM012323.1	14565997	323	scaffold572	9789	254	ULFQ01000043.1	3240812	262
100125	EPC1	HGNC:19876	Published as ancestral sex-linked	Vicoso_et_al_2013a:Dataset_S1(ENSACAG00000007015); Yin_et_al_2016:Supp_Fig_31;	ZW Pair	Colubroidea	yes	yes	yes		ENSG00000108821	17	50183289	ENSGALG00000029182	AADN04001035.1	11904	ENSACAG00000005084	6	77523349	Scaffold932	2208174	1227	CM012323.1	91499229	1215	scaffold1629	275221	1221	ULFQ01000030.1	3210753	1261
100126	KIF5B	HGNC:6324	Published as ancestral sex-linked	Vicoso_et_al_2013a:Dataset_S1(ENSACAG00000007071)	ZW Pair	Colubroidea			yes		ENSG00000073969	17	46590669	ENSGALG00000001055	27	1314137	ENSACAG00000016584	6	65458608	Scaffold1464	716757	700	CM012323.1	79146686	692	scaffold1358	328851	696	ULFQ01000185.1	244722	694
100127	ARHGAP12	HGNC:16348	CVI CM012323.1			Colubroidea					ENSG00000165322	10	31805404	ENSGALG00000007254	2	14265597	ENSACAG00000007253	6	12645221	Scaffold1329	2651230	690	CM012323.1	14990888	674	scaffold1734	82622	659	ULFQ01000043.1	2878828	643
100128	ZEB1	HGNC:11642	CVI CM012323.1			Colubroidea					ENSG00000148516	10	31318495	ENSGALG00000007260	2	14376492	ENSACAG00000007353	6	12786118	Scaffold1329	2706765	898	CM012323.1	15120379	848	scaffold52	74364	864	ULFQ01000043.1	2692184	866
100129	SVIL	HGNC:11480	CVI CM012323.1			Colubroidea					ENSG00000197321	10	29457338	ENSGALG00000007331	2	14684960	ENSACAG00000007423	6	13106655	Scaffold1329	3017416	1722	CM012323.1	15472118	1668	scaffold52	405106	1681	ULFQ01000043.1	2381659	1599
100130	MTPAP	HGNC:25532	CVI CM012323.1			Colubroidea					ENSG00000107951	10	30309801	ENSGALG00000007351	2	15000843	ENSACAG00000007513	6	13462011	Scaffold1329	3363933	331	CM012323.1	15657180	334	scaffold52	781951	319	ULFQ01000043.1	1997057	316
100131	JCAD	HGNC:29283	CVI CM012323.1			Colubroidea					ENSG00000165757	10	30012800	ENSGALG00000007346	2	14907168	ENSACAG00000007512	6	13342014	Scaffold1329	3092215	604	CM012323.1	15757673	366	scaffold52	677062	317	ULFQ01000043.1	2125414	297
100132	MAP3K8	HGNC:6860	CVI CM012323.1			Colubroidea					ENSG00000107968	10	30433937	ENSGALG00000007356	2	15017676	ENSACAG00000007522	6	13484667	Scaffold1329	3404242	429	CM012323.1	15774346	419	scaffold52	828201	414	ULFQ01000043.1	1950817	419
100133	BAMBI	HGNC:30251	CVI CM012323.1			Colubroidea					ENSG00000095739	10	28677342	ENSGALG00000040993	2	15317843	ENSACAG00000007580	6	13786022	Scaffold1329	3671316	230	CM012323.1	16250786	229	scaffold52	1144860	229	ULFQ01000043.1	1635977	230
100134	WAC	HGNC:17327	Published as ancestral sex-linked	Matsubara_et_al_2006:Fig_5; Matsubara_et_al_2012:Fig_1; Vicoso_et_al_2013a:Dataset_S1(ENSACAG00000007583); Matsubara_et_al_2016:Fig_4; Yin_et_al_2016:Supp_Data_1; Perry_et_al_2018:Fig_3	ZW Pair	Colubroidea		yes	yes		ENSG00000141279	17	47522942	ENSGALG00000031332	27	4052338	ENSACAG00000007242	6	74082401	Scaffold62	962752	847	CM012323.1	87811825	797	scaffold1010	1103314	839	ULFQ01000030.1	6999656	838
100135	SSNA1	HGNC:11321	CVI CM012323.1			Colubroidea					ENSG00000176101	9	137188647	ENSGALG00000039186	2	15399558	ENSACAG00000007648	6	13883337	Scaffold637	4360293	94	CM012323.1	16330511	60	scaffold3679	126403	65	ULFQ01000299.1	582314	84
100136	MPP7	HGNC:26542	CVI CM012323.1			Colubroidea					ENSG00000150054	10	28050993	ENSGALG00000007408	2	15445584	ENSACAG00000007649	6	13982787	Scaffold1329	3827051	542	CM012323.1	16429534	531	scaffold52	1306291	533	ULFQ01000043.1	1437670	347
100137	ODAD2	HGNC:25583	Published as ancestral sex-linked	Rovatsos_et_al_2015:Table_S3	Z-Linked	Colubroidea					ENSG00000169126	10	27812164	ENSGALG00000007417	2	15602607	ENSACAG00000007785	6	14055560	Scaffold1329	3907502	899	CM012323.1	16516023	898	scaffold52	1380367	900	ULFQ01000043.1	1308289	896
100138	MKX	HGNC:23729	CVI CM012323.1			Colubroidea					ENSG00000150051	10	27672875	ENSGALG00000007426	2	15691336	ENSACAG00000007829	6	14173003	Scaffold1329	4006795	299	CM012323.1	16613776	294	scaffold52	1476228	276	ULFQ01000043.1	1231878	268
100139	RAB18	HGNC:14244	CVI CM012323.1			Colubroidea					ENSG00000099246	10	27504174	ENSGALG00000007435	2	15789001				Scaffold1329	4129440	196	CM012323.1	16754992	195	scaffold52	1601774	195	ULFQ01000043.1	1103943	201
100140	PTCHD3	HGNC:24776	CVI CM012323.1			Colubroidea					ENSG00000182077	10	27397121	ENSGALG00000023347	2	15869935	ENSACAG00000007851	6	14381343	Scaffold1329	4176175	482	CM012323.1	16793674	463	scaffold52	1645155	428	ULFQ01000043.1	1042945	511
100141	ENSACAG00000029196	ENSEMBL:ENSACAG00000029196	BCO Scaffold1329			Colubroidea								ENSGALG00000044986	2	15851511	ENSACAG00000029196	6	14402808	Scaffold1329	4208159	122	CM012307.1	97247687	26	scaffold262	5813905	34
100142	YME1L1	HGNC:12843	CVI CM012323.1			Colubroidea					ENSG00000136758	10	27110112	ENSGALG00000007492	2	15927463	ENSACAG00000007861	6	14472149	Scaffold1329	4228748	607	CM012323.1	16838236	593	scaffold52	1676661	589	ULFQ01000043.1	1005499	587
100143	MASTL	HGNC:19042	CVI CM012323.1			Colubroidea					ENSG00000120539	10	27154824	ENSGALG00000007507	2	15950427	ENSACAG00000008039	6	14492716	Scaffold1329	4253272	585	CM012323.1	16866593	536	scaffold52	1708816	534	ULFQ01000043.1	982535	542
100144	ACBD5	HGNC:23338	CVI CM012323.1			Colubroidea					ENSG00000107897	10	27195214	ENSGALG00000007519	2	15968850	ENSACAG00000008079	6	14512420	Scaffold1329	4277939	348	CM012323.1	16899873	339	scaffold52	1752448	322	ULFQ01000043.1	952829	323
100145	ABI1	HGNC:11320	CVI CM012323.1			Colubroidea					ENSG00000136754	10	26746593	ENSGALG00000007547	2	16017852	ENSACAG00000008110	6	14588682	Scaffold1329	4314795	471	CM012323.1	16934934	464	scaffold52	1798158	468	ULFQ01000043.1	839727	463
100146	SELENOO	HGNC:30395	CVI CM012323.1			Colubroidea								ENSGALG00000007564	2	16120249				Scaffold1329	4420647	378	CM012323.1	16983857	362	scaffold52	1376041	364	ULFQ01000043.1	776492	352
100147	PDSS1	HGNC:17759	CVI CM012323.1			Colubroidea					ENSG00000148459	10	26697659	ENSGALG00000007559	2	16097994	ENSACAG00000008138	6	14658171	Scaffold1329	4403881	296	CM012323.1	17036689	295	scaffold52	1892204	293	ULFQ01000043.1	828384	276
100148	APBB1IP	HGNC:17379	CVI CM012323.1			Colubroidea					ENSG00000077420	10	26438203	ENSGALG00000007579	2	16147118	ENSACAG00000008163	6	14710219	Scaffold1329	4449971	437	CM012323.1	17088340	413	scaffold52	1954395	415	ULFQ01000043.1	729348	364
100149	DHX8	HGNC:2749	CVI CM012323.1			Colubroidea					ENSG00000067596	17	43483865	ENSGALG00000032305	27	3568955	ENSACAG00000013509	6	61718875	Scaffold4952	291294	1155	CM012323.1	17198353	1020	scaffold827	251068	1142	ULFQ01000122.1	392462	1144
100150	MLX	HGNC:11645	CVI CM012323.1			Colubroidea					ENSG00000108788	17	42567068	ENSGALG00000003199	27	5390278	ENSACAG00000013679	6	61752504	Scaffold4952	281823	206	CM012323.1	17265403	220	scaffold827	295330	215	ULFQ01000122.1	383813	204
100151	PSMC3IP	HGNC:17928	CVI CM012323.1			Colubroidea					ENSG00000131470	17	42572315	ENSGALG00000019741	27	5394153	ENSACAG00000013719	6	61762152	Scaffold4952	272933	203	CM012323.1	17277849	194	scaffold827	308146	187	ULFQ01000122.1	375838	189
100152	RETREG3	HGNC:27258	CVI CM012323.1			Colubroidea					ENSG00000141699	17	42579513	ENSGALG00000003162	27	5398850	ENSACAG00000013745	6	61784897	Scaffold4952	243383	350	CM012323.1	17317542	339	scaffold827	333834	340	ULFQ01000122.1	354095	331
100153	TUBG1	HGNC:12417	Published as ancestral sex-linked	Matsubara_et_al_2006:Fig_5; Matsubara_et_al_2012:Fig_1; Yin_et_al_2016:Supp_Data_1	Z-Linked	Colubroidea					ENSG00000131462	17	42609676	ENSGALG00000030003	27	5405581	ENSACAG00000013771	6	61805142	Scaffold4952	218748	439	CM012323.1	17338199	438	scaffold827	356426	439	ULFQ01000122.1	321674	437
100154	CCR10	HGNC:4474	CVI CM012323.1			Colubroidea					ENSG00000184451	17	42678889	ENSGALG00000028519	27	5421912	ENSACAG00000013855	6	61880021	Scaffold4952	183775	216	CM012323.1	17400170	213	scaffold1899	57264	233	ULFQ01000122.1	202063	212
100155	GAD2	HGNC:4093	Published as ancestral sex-linked	Matsubara_et_al_2006:Fig_5; Matsubara_et_al_2012:Fig_1; Yin_et_al_2016:Supp_Data_1	Z-Linked	Colubroidea					ENSG00000136750	10	26216307	ENSGALG00000040436	2	16272211	ENSACAG00000008193	6	14802068	Scaffold1329	4536126	546	CM012323.1	17478457	547	scaffold52	2054428	544	ULFQ01000043.1	597284	514
100156	MYO3A	HGNC:7601	CVI CM012323.1			Colubroidea					ENSG00000095777	10	25934071	ENSGALG00000007647	2	16304157	ENSACAG00000008363	6	14849268	Scaffold1329	4585601	1127	CM012323.1	17525705	720	scaffold52	2107235	719	ULFQ01000043.1	497593	673
100157	GPR158	HGNC:23689	CVI CM012323.1			Colubroidea					ENSG00000151025	10	25174802	ENSGALG00000007667	2	16497663	ENSACAG00000008498	6	15035612	Scaffold1329	4749472	756	CM012323.1	17730225	734	scaffold52	2301072	725	ULFQ01000043.1	213532	724
100158	THNSL1	HGNC:26160	CVI CM012323.1			Colubroidea					ENSG00000185875	10	25016658	ENSGALG00000007677	2	16726645	ENSACAG00000008536	6	15197494	Scaffold1329	4898185	563	CM012323.1	17913019	538	scaffold52	2468660	551	ULFQ01000043.1	169142	529
100159	ENKUR	HGNC:28388	CVI CM012323.1			Colubroidea					ENSG00000151023	10	24981979	ENSGALG00000007680	2	16734597	ENSACAG00000008543	6	15207401	Scaffold1329	4907345	199	CM012323.1	17922885	183	scaffold52	2480263	157	ULFQ01000043.1	151748	185
100160	PRTFDC1	HGNC:23333	CVI CM012323.1			Colubroidea					ENSG00000099256	10	24848607	ENSGALG00000007694	2	16752954	ENSACAG00000008581	6	15219125	Scaffold1329	4920611	181	CM012323.1	17944384	173	scaffold52	2506389	161	ULFQ01000043.1	85144	175
100161	ARHGAP21	HGNC:23725	CVI CM012323.1			Colubroidea					ENSG00000107863	10	24583609	ENSGALG00000007721	2	16798393	ENSACAG00000008596	6	15289129	Scaffold1329	5045581	1536	CM012323.1	18061866	1167	scaffold52	2641008	1115	ULFQ01003636.1	445	423
100162	EFCAB1	HGNC:25678	CVI CM012323.1			Colubroidea					ENSG00000034239	8	48710789	ENSGALG00000009473	2	22706046	ENSACAG00000015360	6	21291331	Scaffold4776	99779	161	CM012323.1	18110851	162	scaffold52	2696169	162	ULFQ01000405.1	314932	145
100163	RBM48	HGNC:21785	CVI CM012323.1			Colubroidea					ENSG00000127993	7	92528773	ENSGALG00000009467	2	22703137	ENSACAG00000015378	6	21284583	Scaffold4776	94082	214	CM012323.1	18120174	192	scaffold52	2701877	200	ULFQ01000405.1	78810	198
100164	PEX1	HGNC:8850	CVI CM012323.1			Colubroidea					ENSG00000127980	7	92487020	ENSGALG00000009410	2	22680879	ENSACAG00000015394	6	21260955	Scaffold4776	58563	851	CM012323.1	18123052	855	scaffold52	2705019	844	ULFQ01000405.1	269853	817
100165	ACCSL	HGNC:34391	CVI CM012323.1			Colubroidea								ENSGALG00000035761	2	22663994	ENSACAG00000015461	6	21231512	Scaffold4776	32646	347	CM012323.1	18170664	341	scaffold52	2752442	386	ULFQ01000405.1	240780	363
100166	GATAD1	HGNC:29941	CVI CM012323.1			Colubroidea					ENSG00000157259	7	92447448	ENSGALG00000009399	2	22650497	ENSACAG00000015498	6	21221566	Scaffold4776	18490	242	CM012323.1	18192638	228	scaffold52	2776321	237	ULFQ01000405.1	220271	216
100167	ANKIB1	HGNC:22215	CVI CM012323.1			Colubroidea					ENSG00000001629	7	92246234	ENSGALG00000031917	2	22587398	ENSACAG00000015516	6	21135901	Scaffold644	17050	966	CM012323.1	18232008	923	scaffold52	2814890	930	ULFQ01000405.1	136523	924
100168	KRIT1	HGNC:1573	CVI CM012323.1			Colubroidea					ENSG00000001631	7	92198969	ENSGALG00000042651	2	22540843	ENSACAG00000015550	6	21117323	Scaffold644	82139	691	CM012323.1	18292210	682	scaffold52	2869565	683	ULFQ01000405.1	97445	685
100169	LRRD1	HGNC:34300	CVI CM012323.1			Colubroidea											ENSACAG00000015646	6	21106998	Scaffold644	104560	462	CM012323.1	18325744	428	scaffold501	1262	433	ULFQ01000405.1	79912	369
100170	CYP51A1	HGNC:2649	CVI CM012323.1			Colubroidea					ENSG00000001630	7	92112151	ENSGALG00000009365	2	22521894	ENSACAG00000015660	6	21082402	Scaffold644	117925	425	CM012323.1	18338246	414	scaffold501	39219	416	ULFQ01000405.1	57381	421
100171	AKAP9	HGNC:379	CVI CM012323.1			Colubroidea					ENSG00000127914	7	91940867	ENSGALG00000040724	2	22422267	ENSACAG00000015717	6	20976052	Scaffold644	132988	2357	CM012323.1	18351197	2115	scaffold501	52273	2170	ULFQ01000405.1	6078	1169
100172	FZD1	HGNC:4038	CVI CM012323.1			Colubroidea					ENSG00000157240	7	91264364	ENSGALG00000009064	2	22162541	ENSACAG00000015779	6	20755209	Scaffold644	431455	510	CM012323.1	18676930	508	scaffold501	368790	510	ULFQ01000294.1	353007	516
100173	CDK14	HGNC:8883	CVI CM012323.1			Colubroidea					ENSG00000058091	7	90466424	ENSGALG00000009062	2	21877225	ENSACAG00000015785	6	20475429	Scaffold644	502755	421	CM012323.1	18752514	402	scaffold501	450695	400	ULFQ01000294.1	81651	416
100174	PTTG1IP	HGNC:13524	NSC ULFQ01000294.1			Colubroidea								ENSGALG00000009044	2	21777368	ENSACAG00000029267	6	20424711	Scaffold644	694043	107	CM012310.1	53692741	46	scaffold1144	461236	71	ULFQ01000294.1	34620	68
100175	CLDN12	HGNC:2034	CVI CM012323.1			Colubroidea					ENSG00000157224	7	90383721	ENSGALG00000009038	2	21763074	ENSACAG00000015849	6	20418996	Scaffold644	723131	223	CM012323.1	19088282	229	scaffold1144	452178	226	ULFQ01000294.1	20464	229
100176	GTPBP10	HGNC:25106	CVI CM012323.1			Colubroidea					ENSG00000105793	7	90335223	ENSGALG00000009035	2	21746671	ENSACAG00000015854	6	20395606	Scaffold644	731074	285	CM012323.1	19096413	262	scaffold1144	425375	236	ULFQ01000294.1	2972	264
100177	FAM237B	HGNC:53217	BCO Scaffold644			Colubroidea					ENSG00000283267	7	90316503	ENSGALG00000032592	2	21736604	ENSACAG00000029622	6	20378675	Scaffold644	770486	93
100178	CFAP69	HGNC:26107	CVI CM012323.1			Colubroidea					ENSG00000105792	7	90245174	ENSGALG00000009026	2	21710551	ENSACAG00000015871	6	20335968	Scaffold644	777375	627	CM012323.1	19198260	640	scaffold1144	306561	593	ULFQ01000155.1	20833	297
100179	STEAP2	HGNC:17885	CVI CM012323.1			Colubroidea					ENSG00000157214	7	90167590	ENSGALG00000009017	2	21695262	ENSACAG00000015895	6	20313651	Scaffold644	829823	439	CM012323.1	19248117	427	scaffold1144	276995	432	ULFQ01000155.1	83069	431
100180	STEAP1	HGNC:11378	CVI CM012323.1			Colubroidea					ENSG00000164647	7	90154375	ENSGALG00000009006	2	21669403	ENSACAG00000015915	6	20282895	Scaffold644	853354	249	CM012323.1	19296857	236	scaffold1144	246189	235	ULFQ01000155.1	126213	236
100181	ZNF804B	HGNC:21958	CVI CM012323.1			Colubroidea					ENSG00000182348	7	88759368	ENSGALG00000009004	2	21380802	ENSACAG00000015927	6	20033053	Scaffold644	1048944	620	CM012323.1	19534327	518	scaffold1445	177660	541	ULFQ01000155.1	403319	439
100182	STEAP4	HGNC:21923	CVI CM012323.1			Colubroidea					ENSG00000127954	7	88270892	ENSGALG00000008997	2	21036209	ENSACAG00000015932	6	19607672	Scaffold644	1429255	353	CM012323.1	19958094	363	scaffold147	196932	361	ULFQ01000155.1	810602	362
100183	SRI	HGNC:11292	Published as ancestral sex-linked	Matsubara_et_al_2012:Fig_1; Yin_et_al_2016:Supp_Data_1	Z-Linked	Colubroidea					ENSG00000075142	7	88205118	ENSGALG00000008985	2	21011047	ENSACAG00000015952	4	120008298	Scaffold644	1444134	162	CM012323.1	19968121	166	scaffold147	351149	165	ULFQ01000155.1	829718	156
100184	ADAM22	HGNC:201	CVI CM012323.1			Colubroidea					ENSG00000008277	7	87934143	ENSGALG00000008976	2	20936305	ENSACAG00000015990	6	19428953	Scaffold644	1458647	744	CM012323.1	19985609	681	scaffold147	366605	706	ULFQ01000155.1	845431	738
100185	DBF4	HGNC:17364	CVI CM012323.1			Colubroidea					ENSG00000006634	7	87876216	ENSGALG00000008963	2	20856555	ENSACAG00000016088	6	19412017	Scaffold644	1582529	439	CM012323.1	20150743	409	scaffold147	531280	390	ULFQ01000155.1	1027842	389
100186	SLC25A40	HGNC:29680	CVI CM012323.1			Colubroidea					ENSG00000075303	7	87833568	ENSGALG00000019662	2	20841909	ENSACAG00000028482	6	19396011	Scaffold751	950355	170	CM012323.1	20175824	214	scaffold106	35761	148	ULFQ01000121.1	2814511	132
100187	RUNDC3B	HGNC:30286	CVI CM012323.1			Colubroidea					ENSG00000105784	7	87627548	ENSGALG00000008954	2	20796618	ENSACAG00000016115	6	19355201	Scaffold644	1627382	415	CM012323.1	20202035	395	scaffold147	589952	400	ULFQ01000155.1	1096193	334
100188	ABCB1	HGNC:40	CVI CM012323.1			Colubroidea					ENSG00000085563	7	87503633	ENSGALG00000008912	2	20693000	ENSACAG00000016167	6	19282685	Scaffold644	1698606	874	CM012323.1	20278002	751	scaffold147	658225	860	ULFQ01000155.1	1166874	854
100189	CROT	HGNC:2366	CVI CM012323.1			Colubroidea					ENSG00000005469	7	87345681	ENSGALG00000008813	2	20672916	ENSACAG00000016327	6	19239269	Scaffold644	1743464	503	CM012323.1	20328283	423	scaffold147	721532	433	ULFQ01000155.1	1241456	436
100190	ACBD7	HGNC:17715	CVI CM012323.1			Colubroidea					ENSG00000176244	10	15077523	ENSGALG00000019663	2	20648060	ENSACAG00000016391	6	19247372	Scaffold644	1767167	69	CM012323.1	20347842	68	scaffold147	748059	68	ULFQ01000155.1	1263214	66
100191	RPP38	HGNC:30329	CVI CM012323.1			Colubroidea					ENSG00000152464	10	15097180	ENSGALG00000008794	2	20644764				Scaffold644	1779724	91	CM012323.1	20362956	84	scaffold147	761517	84	ULFQ01000155.1	1278361	113
100192	NMT2	HGNC:7858	CVI CM012323.1			Colubroidea					ENSG00000152465	10	15102584	ENSGALG00000008791	2	20613975	ENSACAG00000016397	6	19206392	Scaffold644	1785065	471	CM012323.1	20367134	449	scaffold147	766640	467	ULFQ01000155.1	1284739	463
100193	FAM171A1	HGNC:23522	CVI CM012323.1			Colubroidea					ENSG00000148468	10	15211643	ENSGALG00000008764	2	20520407	ENSACAG00000016457	6	19099969	Scaffold644	1827781	697	CM012323.1	20474342	683	scaffold147	860754	682	ULFQ01000155.1	1400204	648
100194	ITGA8	HGNC:6144	CVI CM012323.1			Colubroidea					ENSG00000077943	10	15513949	ENSGALG00000008747	2	20364201	ENSACAG00000016491	6	18898759	Scaffold644	1942640	894	CM012323.1	20654785	815	scaffold147	1045790	855	ULFQ01000155.1	1576684	855
100195	MINDY3	HGNC:23578	CVI CM012323.1			Colubroidea					ENSG00000148481	10	15778170	ENSGALG00000008739	2	20311172	ENSACAG00000016625	6	18858332	Scaffold644	2080958	418	CM012323.1	20790756	370	scaffold147	1202672	376	ULFQ01000155.1	1746658	373
100196	PTER	HGNC:9590	Published as ancestral sex-linked	Matsubara_et_al_2012:Fig_1; Yin_et_al_2016:Supp_Data_1	Z-Linked	Colubroidea					ENSG00000165983	10	16436943	ENSGALG00000008728	2	20155345	ENSACAG00000016661	6	18696457	Scaffold644	2283829	301	CM012323.1	21115571	294	scaffold147	1410617	306	ULFQ01002218.1	5382	124
100197	C1QL3	HGNC:19359	CVI CM012323.1			Colubroidea					ENSG00000165985	10	16513743	ENSGALG00000032554	2	20148462	ENSACAG00000016680	6	18676703	Scaffold644	2300139	254	CM012323.1	21135287	251	scaffold147	1467132	252	ULFQ01000201.1	698128	188
100198	RSU1	HGNC:10464	CVI CM012323.1			Colubroidea					ENSG00000148484	10	16590611	ENSGALG00000040891	2	20027818	ENSACAG00000016689	6	18523587	Scaffold644	2358559	265	CM012323.1	21177680	262	scaffold147	1535725	261	ULFQ01000282.1	525548	261
100199	CUBN	HGNC:2548	CVI CM012323.1			Colubroidea					ENSG00000107611	10	16823966	ENSGALG00000008704	2	19883398	ENSACAG00000005060	6	18444457	Scaffold644	2440883	1831	CM012323.1	21284621	1738	scaffold147	1648088	1815	ULFQ01000282.1	324969	800
100200	TRDMT1	HGNC:2977	CVI CM012323.1			Colubroidea					ENSG00000107614	10	17142254	ENSGALG00000008686	2	19844753	ENSACAG00000005072	6	18339897	Scaffold644	2613403	275	CM012323.1	21467782	271	scaffold147	1829709	247	ULFQ01000282.1	287009	272
100201	VIM	HGNC:12692	CVI CM012323.1			Colubroidea					ENSG00000026025	10	17228259	ENSGALG00000008677	2	19823100	ENSACAG00000005142	6	18296483	Scaffold644	2658809	391	CM012323.1	21510079	396	scaffold147	1879383	394	ULFQ01000282.1	236307	360
100202	ST8SIA6	HGNC:23317	CVI CM012323.1			Colubroidea					ENSG00000148488	10	17318383	ENSGALG00000008671	2	19761176	ENSACAG00000005223	6	18217621	Scaffold644	2688741	301	CM012323.1	21545000	297	scaffold147	1907146	294	ULFQ01000282.1	158108	264
100203	HACD1	HGNC:9639	CVI CM012323.1			Colubroidea					ENSG00000165996	10	17589032	ENSGALG00000008659	2	19710074	ENSACAG00000028468	6	18154636	Scaffold644	2754938	205	CM012323.1	21625120	194	scaffold147	1989409	183	ULFQ01000282.1	86220	197
100204	STAM	HGNC:11357	CVI CM012323.1			Colubroidea					ENSG00000136738	10	17644125	ENSGALG00000035287	2	19670926	ENSACAG00000005258	6	18126805	Scaffold644	2779302	478	CM012323.1	21653572	465	scaffold147	2024278	442	ULFQ01000282.1	38305	443
100205	MRC1	HGNC:7228	CVI CM012323.1			Colubroidea					ENSG00000260314	10	17809344	ENSGALG00000008629	2	19601294	ENSACAG00000005361	6	18062808	Scaffold644	2834861	877	CM012323.1	21710144	785	scaffold147	2074905	830	ULFQ01000292.1	586983	372
100206	BLOC1S5	HGNC:18561	CVI CM012323.1			Colubroidea											ENSACAG00000028323	6	18012861	Scaffold644	2941349	100	CM012323.1	21827334	129	scaffold137	4179243	123	ULFQ01000292.1	496646	107
100207	SLC39A12	HGNC:20860	CVI CM012323.1			Colubroidea					ENSG00000148482	10	17951839	ENSGALG00000008602	2	19398233	ENSACAG00000005499	6	17921954	Scaffold644	2970934	143	CM012323.1	21960207	64	scaffold137	4128287	64	ULFQ01000292.1	292131	60
100208	CACNB2	HGNC:1402	CVI CM012323.1			Colubroidea					ENSG00000165995	10	18140677	ENSGALG00000008591	2	19149202	ENSACAG00000005593	6	17728968	Scaffold644	3023933	588	CM012323.1	22038855	594	scaffold137	3876866	587	ULFQ01000292.1	89873	578
100209	NSUN6	HGNC:23529	CVI CM012323.1			Colubroidea					ENSG00000241058	10	18545561	ENSGALG00000008564	2	19122855	ENSACAG00000005626	6	17706374	Scaffold644	3173799	309	CM012323.1	22299865	329	scaffold137	3850574	328	ULFQ01000292.1	55561	322
100210	ARL5B	HGNC:23052	CVI CM012323.1			Colubroidea					ENSG00000165997	10	18659405	ENSGALG00000008557	2	19106290	ENSACAG00000005634	6	17680690	Scaffold644	3203863	174	CM012323.1	22329600	173	scaffold137	3828868	175	ULFQ01000292.1	36279	170
100211	MALRD1	HGNC:24331	BCO Scaffold644			Colubroidea					ENSG00000204740	10	19048771	ENSGALG00000008498	2	18807653	ENSACAG00000009386	6	17356169	Scaffold644	3438040	19							ULFQ01000240.1	579823	27
100212	PLXDC2	HGNC:21013	CVI CM012323.1			Colubroidea					ENSG00000120594	10	19816239	ENSGALG00000007956	2	18544512	ENSACAG00000009328	6	17061745	Scaffold644	3506641	458	CM012323.1	22766342	450	scaffold1353	18291	334	ULFQ01000077.1	4558935	426
100213	CYP8B1	HGNC:2653	CVI CM012323.1			Colubroidea					ENSG00000180432	3	42856005	ENSGALG00000033511	2	2104464	ENSACAG00000006809	6	2923128	Scaffold9982	156886	319	CM012323.1	23202008	324	scaffold418	9892	216	ULFQ01000189.1	544044	327
100214	NEBL	HGNC:16932	CVI CM012323.1			Colubroidea					ENSG00000078114	10	20779973	ENSGALG00000031565	2	18298149	ENSACAG00000009235	6	16858004	Scaffold1329	6374901	747	CM012323.1	23222638	726	scaffold1353	259612	708	ULFQ01000077.1	4313004	678
100215	SKIDA1	HGNC:32697	CVI CM012323.1			Colubroidea					ENSG00000180592	10	21513478	ENSGALG00000017395	2	18064334	ENSACAG00000009219	6	16717694	Scaffold1329	6348520	404	CM012323.1	23501381	348	scaffold1353	529443	357	ULFQ01000077.1	4152561	358
100216	MLLT10	HGNC:16063	CVI CM012323.1			Colubroidea					ENSG00000078403	10	21524675	ENSGALG00000007928	2	17937232	ENSACAG00000009100	6	16561580	Scaffold1329	6207850	942	CM012323.1	23512349	869	scaffold1353	540147	847	ULFQ01000077.1	3991768	848
100217	DNAJC1	HGNC:20090	CVI CM012323.1			Colubroidea					ENSG00000136770	10	21756537	ENSGALG00000007914	2	17839631	ENSACAG00000009054	6	16471164	Scaffold1329	6115067	382	CM012323.1	23639499	392	scaffold1353	706797	396	ULFQ01000077.1	3831271	400
100218	COMMD3	HGNC:23332	Published as ancestral sex-linked	Vicoso_et_al_2013a:Dataset_S1,Table_S4,Table_S5(ENSACAG00000009052); Yin_et_al_2016:Supp_Fig_31; Perry_et_al_2018:Fig_3	ZW Pair	Colubroidea	yes	yes	yes		ENSG00000108840	17	44076746				ENSACAG00000004207	6	78408435	Scaffold4163	479836	1007	CM012323.1	92338526	978	scaffold1561	46541	961	ULFQ01000030.1	2246591	984
100219	BMI1	HGNC:1066	Published as ancestral sex-linked	Vicoso_et_al_2013a:Dataset_S1,Table_S4,Table_S5(ENSACAG00000023169); Yin_et_al_2016:Supp_Fig_31	ZW Pair	Colubroidea	yes	yes	yes		ENSG00000198231	17	63773603	ENSGALG00000000581	27	2989797	ENSACAG00000003994	6	78561336	Scaffold4163	621521	865	CM012323.1	92505302	831	scaffold1152	627099	849	ULFQ01000030.1	2163049	847
100220	SPAG6	HGNC:11215	CVI CM012323.1			Colubroidea					ENSG00000077327	10	22345445	ENSGALG00000007892	2	17711127	ENSACAG00000008944	6	16249202	Scaffold1329	5908573	481	CM012323.1	24047340	471	scaffold1528	116928	386	ULFQ01000077.1	3635452	477
100221	PIP4K2A	HGNC:8997	Published as ancestral sex-linked	Matsubara_et_al_2012:Fig_1	Z-Linked	Colubroidea					ENSG00000150867	10	22534849	ENSGALG00000007877	2	17560249	ENSACAG00000008773	6	16137833	Scaffold1329	5794392	392	CM012323.1	24155623	343	scaffold1528	198777	390	ULFQ01000077.1	3518838	391
100222	ARMC3	HGNC:30964	CVI CM012323.1			Colubroidea					ENSG00000165309	10	22928024	ENSGALG00000007864	2	17452004	ENSACAG00000008722	6	16028888	Scaffold1329	5697131	659	CM012323.1	24289561	685	scaffold1528	328609	615	ULFQ01000077.1	3365040	640
100223	MSRB2	HGNC:17061	CVI CM012323.1			Colubroidea					ENSG00000148450	10	23095506				ENSACAG00000028584	6	15989875	Scaffold1329	5678787	38	CM012323.1	24367795	28	scaffold1528	422448	29	ULFQ01000077.1	3343696	19
100224	PTF1A	HGNC:23734	Published as ancestral sex-linked	Yin_et_al_2016:Supp_Fig_31	ZW Pair	Colubroidea	yes				ENSG00000126461	19	49642125				ENSACAG00000014008	6	80596962	Scaffold4163	899075	1061	CM012323.1	92840494	987	scaffold1152	270566	973	ULFQ01000030.1	1800556	992
100225	C10orf67	HGNC:28716	CVI CM012323.1			Colubroidea					ENSG00000179133	10	23201916	ENSGALG00000044019	2	17371299	ENSACAG00000008706	6	15889314	Scaffold1329	5595339	77	CM012323.1	24463523	60	scaffold1528	503456	59	ULFQ01000077.1	3234195	75
100226	OTUD1	HGNC:27346	CVI CM012323.1			Colubroidea					ENSG00000165312	10	23439458	ENSGALG00000026426	2	17359379	ENSACAG00000028448	6	15869556	Scaffold1329	5568921	210	CM012323.1	24492680	197	scaffold516	1198080	198	ULFQ01000077.1	3198426	193
100227	KIAA1217	HGNC:25428	CVI CM012323.1			Colubroidea					ENSG00000120549	10	23694746	ENSGALG00000007766	2	16938374	ENSACAG00000008655	6	15427654	Scaffold1329	5109625	975	CM012323.1	24823709	964	scaffold516	686703	972	ULFQ01000077.1	2585693	955
100228	FAM133B	HGNC:28629	CVI CM012323.1			Colubroidea					ENSG00000234545	7	92560793	ENSGALG00000009475	2	22712260	ENSACAG00000015319	6	21302197	Scaffold4776	112185	183	CM012323.1	25099419	169	scaffold516	641622	187	ULFQ01000077.1	2547044	167
100229	CDK6	HGNC:1777	CVI CM012323.1			Colubroidea					ENSG00000105810	7	92604921	ENSGALG00000009476	2	22731404	ENSACAG00000015273	6	21330537	Scaffold4776	137318	293	CM012323.1	25187484	295	scaffold516	457056	295	ULFQ01000077.1	2372523	295
100230	SAMD9	HGNC:1348	CVI CM012323.1			Colubroidea					ENSG00000205413	7	93099513	ENSGALG00000009479	2	22939327	ENSACAG00000012901	6	21513940	Scaffold4776	283789	159	CM012323.1	25344816	50	scaffold516	374197	76	ULFQ01000077.1	2264559	74
100231	HEPACAM2	HGNC:27364	CVI CM012323.1			Colubroidea					ENSG00000188175	7	93188586	ENSGALG00000009482	2	22957794	ENSACAG00000012904	6	21537240	Scaffold1230	552615	293	CM012323.1	25356422	255	scaffold516	349521	251	ULFQ01000077.1	1938962	263
100232	VPS50	HGNC:25956	CVI CM012323.1			Colubroidea					ENSG00000004766	7	93232340	ENSGALG00000009500	2	22978146	ENSACAG00000012934	6	21589110	Scaffold1230	465521	924	CM012323.1	25385230	918	scaffold516	257608	917	ULFQ01000077.1	2131133	898
100233	CALCR	HGNC:1440	CVI CM012323.1			Colubroidea					ENSG00000004948	7	93424487	ENSGALG00000009509	2	23088761	ENSACAG00000013135	6	21687847	Scaffold1230	361955	423	CM012323.1	25497996	396	scaffold516	125869	396	ULFQ01000077.1	2017812	392
100234	TFPI2	HGNC:11761	CVI CM012323.1			Colubroidea					ENSG00000105825	7	93885396	ENSGALG00000009512	2	23330575	ENSACAG00000013275	6	21937306	Scaffold1230	190727	124	CM012323.1	25759114	123	scaffold657	357940	123	ULFQ01000022.1	7572555	43
100235	GNG11	HGNC:4403	CVI CM012323.1			Colubroidea					ENSG00000127920	7	93921699	ENSGALG00000029899	2	23338682	ENSACAG00000013285	6	21957604	Scaffold1230	177271	66	CM012323.1	25768582	68	scaffold657	347996	69	ULFQ01000077.1	1798857	70
100236	COL1A2	HGNC:2198	CVI CM012323.1			Colubroidea					ENSG00000164692	7	94394561	ENSGALG00000009641	2	23601205	ENSACAG00000013301	6	22172811	Scaffold2293	601339	1017	CM012323.1	26006229	1049	scaffold657	18968	1018	ULFQ01000077.1	1438351	1032
100237	CASD1	HGNC:16014	CVI CM012323.1			Colubroidea					ENSG00000127995	7	94509219	ENSGALG00000009653	2	23650426	ENSACAG00000013610	6	22243228	Scaffold2293	548276	695	CM012323.1	26078925	633	scaffold685	705450	664	ULFQ01000077.1	1382412	684
100238	SGCE	HGNC:10808	CVI CM012323.1			Colubroidea					ENSG00000127990	7	94524204	ENSGALG00000009670	2	23679323	ENSACAG00000013695	6	22277574	Scaffold2293	503778	405	CM012323.1	26119075	426	scaffold685	658590	404	ULFQ01000077.1	1038362	405
100239	PPP1R9A	HGNC:14946	CVI CM012323.1			Colubroidea					ENSG00000158528	7	94907202	ENSGALG00000009686	2	23744767	ENSACAG00000027389	6	22334716	Scaffold2293	373964	1035	CM012323.1	26218621	528	scaffold685	550012	558	ULFQ01000077.1	1194251	466
100240	PON1	HGNC:9204	CVI CM012323.1			Colubroidea					ENSG00000005421	7	95297676	ENSGALG00000009689	2	23875666	ENSACAG00000013907	6	22503357	Scaffold2293	344736	222	CM012323.1	26382805	142	scaffold685	527143	97	ULFQ01000077.1	1171164	105
100241	ASB4	HGNC:16009	CVI CM012323.1			Colubroidea					ENSG00000005981	7	95478444	ENSGALG00000009691	2	23910398	ENSACAG00000013993	6	22537229	Scaffold2293	308710	340	CM012323.1	26413738	340	scaffold685	488921	338	ULFQ01000077.1	1133513	340
100242	PDK4	HGNC:8812	CVI CM012323.1			Colubroidea					ENSG00000004799	7	95583499	ENSGALG00000009700	2	23933443	ENSACAG00000014020	6	22566503	Scaffold2293	276712	369	CM012323.1	26461605	330	scaffold685	277239	338	ULFQ01000077.1	1086082	315
100243	DYNC1I1	HGNC:2963	CVI CM012323.1			Colubroidea					ENSG00000158560	7	95772506	ENSGALG00000009722	2	23985830	ENSACAG00000014180	6	22623203	Scaffold2293	60978	609	CM012323.1	26551644	606	scaffold685	200222	603	ULFQ01000077.1	820165	600
100244	SLC25A13	HGNC:10983	CVI CM012323.1			Colubroidea					ENSG00000004864	7	96120220	ENSGALG00000009728	2	24156138	ENSACAG00000014580	6	22834422	Scaffold2293	4243	487	CM012323.1	26749111	623	scaffold685	74535	625	ULFQ01000077.1	699982	499
100245	SEM1	HGNC:10845	CVI CM012323.1			Colubroidea					ENSG00000127922	7	96481626	ENSGALG00000009733	2	24349812	ENSACAG00000014686	6	23063441	Scaffold2376	173718	68	CM012323.1	27012470	68	scaffold773	493436	68	ULFQ01000077.1	507326	68
100246	DLX6	HGNC:2919	CVI CM012323.1			Colubroidea					ENSG00000006377	7	97005548	ENSGALG00000023195	2	24471347	ENSACAG00000014705	6	23237333	Scaffold2376	317052	206	CM012323.1	27164611	177	scaffold773	349794	177	ULFQ01000077.1	350746	225
100247	DLX5	HGNC:2918	CVI CM012323.1			Colubroidea					ENSG00000105880	7	97020392	ENSGALG00000009129	2	24479856	ENSACAG00000014717	6	23265819	Scaffold2376	334656	243	CM012323.1	27181870	151	scaffold773	333905	236	ULFQ01000077.1	334571	221
100248	SDHAF3	HGNC:21752	CVI CM012323.1			Colubroidea					ENSG00000196636	7	97116590				ENSACAG00000014743	6	23315073	Scaffold2376	374248	97	CM012323.1	27220039	93	scaffold773	285362	94	ULFQ01000077.1	268631	93
100249	TAC1	HGNC:11517	CVI CM012323.1			Colubroidea					ENSG00000006128	7	97731908	ENSGALG00000009737	2	24673037	ENSACAG00000029633	6	23493962	Scaffold2376	543245	74	CM012323.1	27454583	47	scaffold773	69620	48	ULFQ01000077.1	57660	59
100250	ASNS	HGNC:753	CVI CM012323.1			Colubroidea					ENSG00000070669	7	97852118	ENSGALG00000009748	2	24690802	ENSACAG00000012961	6	23528980	Scaffold2376	567234	512	CM012323.1	27480398	503	scaffold773	37508	504	ULFQ01000077.1	26001	504
100251	C1GALT1	HGNC:24337	CVI CM012323.1			Colubroidea					ENSG00000106392	7	7156934	ENSGALG00000009752	2	24717102	ENSACAG00000013040	6	23562204	Scaffold2376	598817	322	CM012323.1	27518560	309	scaffold773	5129	309	ULFQ01000077.1	1964	317
100252	COL28A1	HGNC:22442	CVI CM012323.1			Colubroidea					ENSG00000215018	7	7356203	ENSGALG00000010259	2	24735576	ENSACAG00000013078	6	23589408	Scaffold2376	608764	689	CM012323.1	27544779	694	scaffold1288	627632	640	ULFQ01000095.1	3936013	709
100253	MIOS	HGNC:21905	CVI CM012323.1			Colubroidea					ENSG00000164654	7	7566872	ENSGALG00000010699	2	24805292	ENSACAG00000013133	6	23668172	Scaffold2376	696843	838	CM012323.1	27648430	822	scaffold1288	595658	822	ULFQ01000095.1	3899246	816
100254	RPA3	HGNC:10291	CVI CM012323.1			Colubroidea					ENSG00000106399	7	7636518	ENSGALG00000010700	2	24819084	ENSACAG00000013055	6	23581037	Scaffold2376	717406	79	CM012323.1	27672899	76	scaffold1288	582500	41	ULFQ01000095.1	3880830	76
100255	UMAD1	HGNC:48955	CVI CM012323.1			Colubroidea					ENSG00000219545	7	7640711	ENSGALG00000023189	2	24822500	ENSACAG00000013178	6	23718910	Scaffold2376	777664	39	CM012323.1	27730654	34	scaffold1288	513138	35	ULFQ01000095.1	3833142	33
100256	GLCCI1	HGNC:18713	CVI CM012323.1			Colubroidea					ENSG00000106415	7	7968794	ENSGALG00000035239	2	24920116	ENSACAG00000013179	6	23745134	Scaffold2376	793653	462	CM012323.1	27769010	417	scaffold1288	429927	434	ULFQ01000095.1	3766078	416
100257	ICA1	HGNC:5343	CVI CM012323.1			Colubroidea					ENSG00000003147	7	8113184	ENSGALG00000010708	2	24981101	ENSACAG00000013214	6	23805972	Scaffold2376	854331	386	CM012323.1	27838807	341	scaffold1288	360318	362	ULFQ01000095.1	3684924	347
100258	NXPH1	HGNC:20693	CVI CM012323.1			Colubroidea					ENSG00000122584	7	8433955	ENSGALG00000010711	2	25116620	ENSACAG00000013252	6	23949714	Scaffold2376	991256	264	CM012323.1	28025472	260	scaffold1288	47601	259	ULFQ01000095.1	3411529	260
100259	PHF14	HGNC:22203	CVI CM012323.1			Colubroidea					ENSG00000106443	7	10973336	ENSGALG00000038041	2	26093813	ENSACAG00000013266	6	25016686	Scaffold3800	835875	813	CM012323.1	29292322	814	scaffold803	224	571	ULFQ01000095.1	2021206	821
100260	THSD7A	HGNC:22207	CVI CM012323.1			Colubroidea					ENSG00000005108	7	11370357	ENSGALG00000010718	2	26317033	ENSACAG00000013316	6	25222845	Scaffold3800	576807	1407	CM012323.1	29476225	1384	scaffold803	179246	1388	ULFQ01000095.1	1703005	1368
100261	TMEM106B	HGNC:22407	CVI CM012323.1			Colubroidea					ENSG00000106460	7	12211241	ENSGALG00000035140	2	26625916	ENSACAG00000013407	6	25606934	Scaffold3800	420653	251	CM012323.1	29767005	246	scaffold803	490387	247	ULFQ01000095.1	1594945	246
100262	SCIN	HGNC:21695	CVI CM012323.1			Colubroidea					ENSG00000006747	7	12570577	ENSGALG00000010770	2	26793309	ENSACAG00000013469	6	25776841	Scaffold3800	272100	636	CM012323.1	29903975	624	scaffold803	626337	628	ULFQ01000095.1	1400099	628
100263	ARL4A	HGNC:695	CVI CM012323.1			Colubroidea					ENSG00000122644	7	12686856	ENSGALG00000027757	2	26855855	ENSACAG00000013615	6	25852470	Scaffold3800	264835	197	CM012323.1	29963989	198	scaffold803	683614	198	ULFQ01000095.1	1393399	198
100264	ETV1	HGNC:3490	CVI CM012323.1			Colubroidea					ENSG00000006468	7	13891228	ENSGALG00000035504	2	27328222	ENSACAG00000013062	6	26369115	Scaffold5643	35701	447	CM012323.1	30535823	450	scaffold1188	56501	448	ULFQ01000095.1	646848	444
100265	DGKB	HGNC:2850	CVI CM012323.1			Colubroidea					ENSG00000136267	7	14145049	ENSGALG00000033561	2	27443683	ENSACAG00000012896	6	26505266	Scaffold489	17981	717	CM012323.1	30708808	661	scaffold1188	214962	717	ULFQ01000095.1	296588	712
100266	AGMO	HGNC:33784	CVI CM012323.1			Colubroidea					ENSG00000187546	7	15200318	ENSGALG00000010792	2	27894534	ENSACAG00000024920	6	26886307	Scaffold489	391306	208	CM012323.1	31313834	213	scaffold1188	712396	176	ULFQ01000095.1	13924	241
100267	MEOX2	HGNC:7014	CVI CM012323.1			Colubroidea					ENSG00000106511	7	15611212	ENSGALG00000010794	2	28094371	ENSACAG00000012882	6	27051956	Scaffold489	486747	277	CM012323.1	31476210	196	scaffold1046	173891	271	ULFQ01000097.1	3924538	274
100268	CRPPA	HGNC:37276	CVI CM012323.1			Colubroidea					ENSG00000214960	7	16087527	ENSGALG00000010795	2	28334902	ENSACAG00000012815	6	27315576	Scaffold1891	44527	241	CM012323.1	31732558	194	scaffold350	5533	144	ULFQ01000097.1	3635957	203
100269	SOSTDC1	HGNC:21748	CVI CM012323.1			Colubroidea					ENSG00000171243	7	16461481	ENSGALG00000034685	2	28455527	ENSACAG00000012810	6	27391000	Scaffold1891	109168	179	CM012323.1	31794906	160	scaffold350	36964	161	ULFQ01000097.1	3614799	155
100270	LRRC72	HGNC:42972	CVI CM012323.1			Colubroidea					ENSG00000205858	7	16526880				ENSACAG00000012804	6	27436648	Scaffold1891	158461	139	CM012323.1	31866979	157	scaffold350	92707	159	ULFQ01000097.1	3559472	155
100271	ANKMY2	HGNC:25370	CVI CM012323.1			Colubroidea					ENSG00000106524	7	16599776	ENSGALG00000010804	2	28519381	ENSACAG00000012769	6	27456662	Scaffold1891	182933	313	CM012323.1	31892446	268	scaffold350	122162	281	ULFQ01000097.1	3527893	290
100272	BZW2	HGNC:18808	CVI CM012323.1			Colubroidea					ENSG00000136261	7	16646131	ENSGALG00000010809	2	28540481	ENSACAG00000012646	6	27505693	Scaffold1891	219247	394	CM012323.1	31920423	394	scaffold350	161138	385	ULFQ01000097.1	3492931	386
100273	TSPAN13	HGNC:21643	CVI CM012323.1			Colubroidea					ENSG00000106537	7	16753535	ENSGALG00000027240	2	28607678	ENSACAG00000012640	6	27554398	Scaffold1891	262460	188	CM012323.1	31973726	158	scaffold350	197800	186	ULFQ01000097.1	3461386	189
100274	AGR2	HGNC:328	CVI CM012323.1			Colubroidea					ENSG00000106541	7	16791811	ENSGALG00000010825	2	28627303	ENSACAG00000012587	6	27579559	Scaffold1891	279204	126	CM012323.1	31992177	115	scaffold350	217313	117	ULFQ01000097.1	3434063	108
100275	AGR3	HGNC:24167	CVI CM012323.1			Colubroidea					ENSG00000173467	7	16859405	ENSGALG00000019651	2	28654654	ENSACAG00000012579	6	27606040	Scaffold1891	311590	152	CM012323.1	32018607	147	scaffold350	242031	145	ULFQ01000097.1	3403858	143
100276	AHR	HGNC:348	CVI CM012323.1			Colubroidea					ENSG00000106546	7	16916359	ENSGALG00000010836	2	28805158	ENSACAG00000023372	6	27808267	Scaffold403	2444196	480	CM012323.1	32138089	500	scaffold370	45452	506	ULFQ01000097.1	3212468	498
100277	SNX13	HGNC:21335	CVI CM012323.1			Colubroidea					ENSG00000071189	7	17790761	ENSGALG00000010840	2	29049123	ENSACAG00000012199	6	27926688	Scaffold403	2291162	877	CM012323.1	32330918	870	scaffold370	256567	867	ULFQ01000097.1	2990988	871
100278	HDAC9	HGNC:14065	CVI CM012323.1			Colubroidea					ENSG00000048052	7	18086949	ENSGALG00000010854	2	29159908	ENSACAG00000011830	6	28418230	Scaffold403	1809944	851	CM012323.1	32700465	751	scaffold1561	46601	481	ULFQ01000097.1	2331935	736
100279	TWIST1	HGNC:12428	CVI CM012323.1			Colubroidea					ENSG00000122691	7	19020991	ENSGALG00000041640	2	29649182	ENSACAG00000011825	6	28648520	Scaffold403	1740547	161	CM012323.1	33049988	166	scaffold197	275344	167	ULFQ01000097.1	2267833	161
100280	FERD3L	HGNC:16660	CVI CM012323.1			Colubroidea					ENSG00000146618	7	19144782	ENSGALG00000010862	2	29667038	ENSACAG00000011821	6	28678177	Scaffold403	1716187	73	CM012323.1	33076354	70	scaffold197	253494	71	ULFQ01000097.1	2244263	70
100281	POLR1F	HGNC:18027	CVI CM012323.1			Colubroidea					ENSG00000105849	7	19695462	ENSGALG00000010863	2	29836832	ENSACAG00000011817	6	28881108	Scaffold403	1540732	145	CM012323.1	33265332	146	scaffold197	68813	145	ULFQ01000097.1	2027957	143
100282	TMEM196	HGNC:22431	CVI CM012323.1			Colubroidea					ENSG00000173452	7	19719310	ENSGALG00000010865	2	29858046	ENSACAG00000011804	6	28908225	Scaffold403	1504695	161	CM012323.1	33293115	155	scaffold197	31482	158	ULFQ01000097.1	1984053	158
100283	MACC1	HGNC:30215	CVI CM012323.1			Colubroidea					ENSG00000183742	7	20134655	ENSGALG00000010868	2	29988269	ENSACAG00000011775	6	29079369	Scaffold403	1437235	651	CM012323.1	33392177	640	scaffold1235	46756	641	ULFQ01000097.1	1891740	635
100284	ITGB8	HGNC:6163	CVI CM012323.1			Colubroidea					ENSG00000105855	7	20330702	ENSGALG00000010875	2	30066616	ENSACAG00000011506	6	29206369	Scaffold403	1348734	503	CM012323.1	33477325	476	scaffold1235	132735	480	ULFQ01000097.1	1789541	462
100285	ABCB5	HGNC:46	CVI CM012323.1			Colubroidea								ENSGALG00000010901	2	30155664	ENSACAG00000011331	6	29308520	Scaffold403	1267799	892	CM012323.1	33534453	866	scaffold1235	189868	904	ULFQ01000097.1	1672847	833
100286	SP8	HGNC:19196	CVI CM012323.1			Colubroidea					ENSG00000164651	7	20782283	ENSGALG00000035725	2	30247282				Scaffold403	1226990	379	CM012323.1	33634827	283	scaffold1235	302645	363	ULFQ01000097.1	1622160	384
100287	KLF17	HGNC:18830	DAC scaffold1235			Colubroidea					ENSG00000171872	1	44118850							Scaffold403	914233	45	CM012307.1	4707618	43	scaffold1235	631567	45	ULFQ01000094.1	1600457	42
100288	SP4	HGNC:11209	Published as ancestral sex-linked	Rovatsos_et_al_2015:Table_S3; Yin_et_al_2016:Supp_Fig_31	ZW Pair	Colubroidea	yes		yes		ENSG00000108306	17	39252644	ENSGALG00000001682	27	4539319	ENSACAG00000017505	6	67619713	Scaffold751	1590443	418	CM012323.1	81511327	429	scaffold328	2304022	428	ULFQ01000121.1	2057303	428
100289	DNAH11	HGNC:2942	CVI CM012323.1			Colubroidea					ENSG00000105877	7	21543215				ENSACAG00000014157	6	29891618	Scaffold403	752539	2727	CM012323.1	33975120	2657	scaffold1235	659163	2276	ULFQ01000097.1	1065633	2627
100290	CDCA7L	HGNC:30777	CVI CM012323.1			Colubroidea					ENSG00000164649	7	21900900	ENSGALG00000035978	2	30643566	ENSACAG00000014127	6	29972295	Scaffold403	741175	290	CM012323.1	34160842	127	scaffold547	21573	109	ULFQ01000097.1	1057382	121
100291	RAPGEF5	HGNC:16862	CVI CM012323.1			Colubroidea					ENSG00000136237	7	22118238	ENSGALG00000034024	2	30714422	ENSACAG00000014038	6	30064905	Scaffold403	564019	669	CM012323.1	34237097	646	scaffold547	98912	631	ULFQ01000097.1	895539	631
100292	IL6	HGNC:6018	CVI CM012323.1			Colubroidea					ENSG00000136244	7	22725884	ENSGALG00000010915	2	30949385	ENSACAG00000029018	6	30304240	Scaffold403	479514	61	CM012323.1	34444261	40	scaffold547	306890	34	ULFQ01000097.1	804459	72
100293	TOMM7	HGNC:21648	CVI CM012323.1			Colubroidea					ENSG00000196683	7	22812628	ENSGALG00000029856	2	30960328	ENSACAG00000014032	6	30312298	Scaffold403	469639	50	CM012323.1	34454140	46	scaffold547	314610	46	ULFQ01000097.1	797283	44
100294	FAM126A	HGNC:24587	CVI CM012323.1			Colubroidea					ENSG00000122591	7	22889371	ENSGALG00000010925	2	30981678	ENSACAG00000013949	6	30337107	Scaffold403	425792	389	CM012323.1	34471830	386	scaffold547	339128	383	ULFQ01000097.1	750718	390
100295	KLHL7	HGNC:15646	CVI CM012323.1			Colubroidea					ENSG00000122550	7	23105758	ENSGALG00000010938	2	31039144	ENSACAG00000013755	6	30403805	Scaffold403	366314	577	CM012323.1	34556756	559	scaffold547	421307	557	ULFQ01000097.1	653851	556
100296	FANCF	HGNC:3587	CVI CM012323.1			Colubroidea					ENSG00000183161	11	22622890	ENSGALG00000003660	5	2903331	ENSACAG00000015133	1	58810112	Scaffold403	160872	109	CM012323.1	34568009	40	scaffold547	639456	37	ULFQ01000194.1	341420	76
100297	NUP42	HGNC:17010	CVI CM012323.1			Colubroidea					ENSG00000136243	7	23181827	ENSGALG00000010942	2	31064003	ENSACAG00000013735	6	30426922	Scaffold403	353071	110	CM012323.1	34570233	83	scaffold547	434724	112	ULFQ01000097.1	639405	104
100298	GPNMB	HGNC:4462	CVI CM012323.1			Colubroidea					ENSG00000136235	7	23235967	ENSGALG00000010949	2	31184795	ENSACAG00000013625	6	30459487	Scaffold403	320807	327	CM012323.1	34591326	316	scaffold547	454263	356	ULFQ01000097.1	592067	329
100299	MALSU1	HGNC:21721	CVI CM012323.1			Colubroidea					ENSG00000156928	7	23298739	ENSGALG00000010954	2	31202583	ENSACAG00000013606	6	30495935	Scaffold403	311339	101	CM012323.1	34606885	99	scaffold547	480478	97	ULFQ01000097.1	581464	99
100300	IGF2BP3	HGNC:28868	CVI CM012323.1			Colubroidea					ENSG00000136231	7	23310209	ENSGALG00000010961	2	31211304	ENSACAG00000013538	6	30506585	Scaffold403	220975	570	CM012323.1	34622313	559	scaffold547	494135	552	ULFQ01000030.1	4961869	407
100301	TRA2A	HGNC:16645	Published as ancestral sex-linked	Vicoso_et_al_2013a:Dataset_S1(ENSACAG00000013502)	ZW Pair	Colubroidea		yes			ENSG00000108799	17	42700275	ENSGALG00000003068	27	5438063	ENSACAG00000014235	6	61946557	Scaffold4952	106872	698	CM012323.1	72857382	679	scaffold2738	36995	654	ULFQ01000122.1	174320	672
100302	CCDC126	HGNC:22398	Published as ancestral sex-linked	Matsubara_et_al_2006:Fig_5(LOC90693); Matsubara_et_al_2012:Fig_1; Yin_et_al_2016:Supp_Data_1	Z-Linked	Colubroidea					ENSG00000169193	7	23597379	ENSGALG00000010976	2	31367245	ENSACAG00000013494	6	30652967	Scaffold403	42125	123	CM012323.1	34827323	118	scaffold547	637377	117	ULFQ01000097.1	395637	117
100303	FAM221A	HGNC:27977	CVI CM012323.1			Colubroidea					ENSG00000188732	7	23680130	ENSGALG00000010977	2	31384712	ENSACAG00000013481	6	30657587	Scaffold403	139722	247	CM012323.1	34832149	241	scaffold547	642029	238	ULFQ01000097.1	375125	243
100304	STK31	HGNC:11407	CVI CM012323.1			Colubroidea					ENSG00000196335	7	23710167	ENSGALG00000010980	2	31394975	ENSACAG00000013399	6	30672266	Scaffold403	99501	480	CM012323.1	34851891	385	scaffold547	674700	439	ULFQ01000097.1	247891	315
100305	NPY	HGNC:7955	CVI CM012323.1			Colubroidea					ENSG00000122585	7	24284163	ENSGALG00000010983	2	31521047	ENSACAG00000013388	6	30853219	Scaffold670	16797	93	CM012323.1	35045409	94	scaffold547	885776	95	ULFQ01000097.1	103170	87
100306	MPP6	HGNC:18167	CVI CM012323.1			Colubroidea					ENSG00000105926	7	24573268	ENSGALG00000010988	2	31634809	ENSACAG00000013302	6	31032228	Scaffold670	175026	516	CM012323.1	35226459	516	scaffold547	1065319	516	ULFQ01000056.1	6681654	514
100307	GSDME	HGNC:2810	CVI CM012323.1			Colubroidea					ENSG00000105928	7	24698351	ENSGALG00000010997	2	31663719	ENSACAG00000013246	6	31092547	Scaffold670	203308	302	CM012323.1	35252373	275	scaffold547	1089652	217	ULFQ01000056.1	6655781	249
100308	OSBPL3	HGNC:16370	CVI CM012323.1			Colubroidea					ENSG00000070882	7	24796539	ENSGALG00000011007	2	31704354	ENSACAG00000013080	6	31172749	Scaffold670	260901	759	CM012323.1	35314432	714	scaffold547	1151873	708	ULFQ01000056.1	6546994	743
100309	CYCS	HGNC:19986	CVI CM012323.1			Colubroidea					ENSG00000172115	7	25120091	ENSGALG00000011020	2	31819123	ENSACAG00000013076	6	31328170	Scaffold670	394018	89	CM012323.1	35469351	90	scaffold547	1315464	89	ULFQ01000056.1	6462569	88
100310	C7orf31	HGNC:21722	CVI CM012323.1			Colubroidea					ENSG00000153790	7	25134697	ENSGALG00000011021	2	31824634	ENSACAG00000027782	6	31339467	Scaffold670	400952	135	CM012323.1	35479797	128	scaffold547	1324402	126	ULFQ01000056.1	6454665	123
100311	NPVF	HGNC:13782	CVI CM012323.1			Colubroidea					ENSG00000105954	7	25224570	ENSGALG00000011022	2	31857592	ENSACAG00000013069	6	31362176	Scaffold670	145597	43	CM012323.1	35496599	53	scaffold547	1348122	26	ULFQ01000056.1	6431708	40
100312	HNRNPA2B1	HGNC:5033	CVI CM012323.1			Colubroidea					ENSG00000122566	7	26173057	ENSGALG00000011036	2	32241186	ENSACAG00000012992	6	31853421	Scaffold670	813943	341	CM012323.1	35967055	341	scaffold547	1849131	341	ULFQ01000056.1	5901078	341
100313	CBX3	HGNC:1553	CVI CM012323.1			Colubroidea					ENSG00000122565	7	26201162	ENSGALG00000011038	2	32252636	ENSACAG00000012973	6	31866784	Scaffold670	827580	178	CM012323.1	35985941	171	scaffold547	1864079	178	ULFQ01000056.1	5888832	178
100314	SNX10	HGNC:14974	CVI CM012323.1			Colubroidea					ENSG00000086300	7	26291895	ENSGALG00000011046	2	32275230	ENSACAG00000012971	6	31897031	Scaffold670	885732	165	CM012323.1	36024624	159	scaffold547	1923542	155	ULFQ01000056.1	5815697	143
100315	SKAP2	HGNC:15687	CVI CM012323.1			Colubroidea					ENSG00000005020	7	26667062	ENSGALG00000030081	2	32451258	ENSACAG00000010455	GL343275.1	1657982	Scaffold670	1144047	219	CM012323.1	36288439	207	scaffold922	1357776	236	ULFQ01000056.1	5391875	220
100316	HOXA1	HGNC:5099	Published as candidate W-linked	Vicoso_et_al_2013a:Dataset_S1(ENSACAG00000010967)	ZW Pair	Colubroidea		yes			ENSG00000196961	19	49766968				ENSACAG00000013405	6	80196262	Scaffold3668	18521	901	CM012323.1	93239764	898	scaffold1084	122163	934	ULFQ01000030.1	1380037	931
100317	HOXA2	HGNC:5103	CVI CM012323.1			Colubroidea					ENSG00000105996	7	27100354	ENSGALG00000040521	2	32640373	ENSACAG00000010430	GL343275.1	1530375	Scaffold670	1371554	324	CM012323.1	36550840	316	scaffold922	1236008	313	ULFQ01000056.1	5273438	316
100318	HOXA3	HGNC:5104	CVI CM012323.1			Colubroidea					ENSG00000105997	7	27106184	ENSGALG00000027925	2	32646057	ENSACAG00000010401	GL343275.1	1494486	Scaffold670	1379457	354	CM012323.1	36558574	344	scaffold922	1226585	345	ULFQ01000056.1	5264022	350
100319	HOXA4	HGNC:5105	CVI CM012323.1			Colubroidea					ENSG00000197576	7	27128507	ENSGALG00000022622	2	32666501	ENSACAG00000010390	GL343275.1	1489989	Scaffold670	1404204	159	CM012323.1	36582558	148	scaffold922	1205273	146	ULFQ01000056.1	5243087	162
100320	HOXA5	HGNC:5106	CVI CM012323.1			Colubroidea					ENSG00000106004	7	27141052	ENSGALG00000025929	2	32666651	ENSACAG00000010364	GL343275.1	1471904	Scaffold670	1418431	212	CM012323.1	36596493	184	scaffold922	1190608	190	ULFQ01000056.1	5228611	205
100321	HOXA6	HGNC:5107	CVI CM012323.1			Colubroidea					ENSG00000106006	7	27145396	ENSGALG00000028908	2	32684361				Scaffold670	1422855	175	CM012323.1	36600721	152	scaffold922	1186322	172	ULFQ01000056.1	5223835	148
100322	HOXA7	HGNC:5108	CVI CM012323.1			Colubroidea					ENSG00000122592	7	27153716	ENSGALG00000026989	2	32692561	ENSACAG00000010322	GL343275.1	1454822	Scaffold670	1432190	194	CM012323.1	36609974	179	scaffold922	1176995	194	ULFQ01000056.1	5214954	194
100323	HOXA9	HGNC:5109	CVI CM012323.1			Colubroidea					ENSG00000078399	7	27162435	ENSGALG00000028983	2	32700853	ENSACAG00000007286	GL343275.1	1440520	Scaffold670	1442275	209	CM012323.1	36619801	211	scaffold922	1167080	208	ULFQ01000056.1	5204968	208
100324	HOXA10	HGNC:5100	NSC ULFQ01000056.1			Colubroidea					ENSG00000253293	7	27170591	ENSGALG00000026631	2	32709871	ENSACAG00000010315	GL343275.1	1422825	Scaffold670	1452386	211	CM012306.1	139120267	122	scaffold922	1155679	207	ULFQ01000056.1	5193600	210
100325	EVX1	HGNC:3506	CVI CM012323.1			Colubroidea					ENSG00000106038	7	27242700	ENSGALG00000037310	2	32772492	ENSACAG00000007272	GL343275.1	1240832	Scaffold670	1563342	323	CM012323.1	36627375	276	scaffold922	1038240	276	ULFQ01000056.1	5077420	275
100326	HOXA11	HGNC:5101	CVI CM012323.1			Colubroidea					ENSG00000005073	7	27181510	ENSGALG00000040021	2	32720165	ENSACAG00000010304	GL343275.1	1402995	Scaffold670	1466303	220	CM012323.1	36642169	196	scaffold922	1141935	200	ULFQ01000056.1	5179270	208
100327	HOXA13	HGNC:5102	CVI CM012323.1			Colubroidea					ENSG00000106031	7	27193503	ENSGALG00000027234	2	32738288	ENSACAG00000010302	GL343275.1	1375087	Scaffold670	1486539	238	CM012323.1	36662101	223	scaffold922	1122134	227	ULFQ01000056.1	5160197	237
100328	HIBADH	HGNC:4907	CVI CM012323.1			Colubroidea					ENSG00000106049	7	27525442	ENSGALG00000033207	2	32894746	ENSACAG00000007238	GL343275.1	1006441	Scaffold670	1679126	297	CM012323.1	36875890	275	scaffold922	858175	276	ULFQ01000056.1	4871080	295
100329	TAX1BP1	HGNC:11575	Published as ancestral sex-linked	Matsubara_et_al_2006:Fig_5; Matsubara_et_al_2012:Fig_1; Yin_et_al_2016:Supp_Data_1	Z-Linked	Colubroidea					ENSG00000106052	7	27739331	ENSGALG00000042822	2	32993642	ENSACAG00000007204	GL343275.1	944544	Scaffold670	1782164	628	CM012323.1	36959541	620	scaffold922	795057	586	ULFQ01000056.1	4818036	564
100330	JAZF1	HGNC:28917	CVI CM012323.1			Colubroidea					ENSG00000153814	7	27830573	ENSGALG00000030455	2	33044774	ENSACAG00000007174	GL343275.1	827265	Scaffold670	1811979	240	CM012323.1	37026291	205	scaffold922	667717	239	ULFQ01000056.1	4676523	239
100331	CREB5	HGNC:16844	CVI CM012323.1			Colubroidea					ENSG00000146592	7	28299321	ENSGALG00000038265	2	33303710	ENSACAG00000007144	GL343275.1	364116	Scaffold670	2054428	456	CM012323.1	37271412	432	scaffold922	298823	425	ULFQ01000056.1	4322909	436
100332	WIPF3	HGNC:22004	CVI CM012323.1			Colubroidea					ENSG00000122574	7	29806486	ENSGALG00000011170	2	33916994	ENSACAG00000000853	6	35556271	Scaffold670	2160017	215	CM012323.1	37507865	215	scaffold770	121213	213	ULFQ01000056.1	3891117	202
100333	TRIL	HGNC:22200	CVI CM012323.1			Colubroidea					ENSG00000255690	7	28953358	ENSGALG00000011145	2	33598483	ENSACAG00000007137	GL343275.1	288447	Scaffold670	2309250	560	CM012323.1	37594126	550	scaffold922	211488	553	ULFQ01000056.1	4247959	544
100334	CPVL	HGNC:14399	CVI CM012323.1			Colubroidea					ENSG00000106066	7	28995231				ENSACAG00000007086	GL343275.1	193732	Scaffold670	2351301	397	CM012323.1	37646002	386	scaffold922	143497	364	ULFQ01000056.1	4164082	396
100335	CHN2	HGNC:1944	CVI CM012323.1			Colubroidea					ENSG00000106069	7	29146569	ENSGALG00000011164	2	33692850	ENSACAG00000007001	GL343275.1	52	Scaffold670	2418399	440	CM012323.1	37699279	435	scaffold628	2439498	324	ULFQ01000056.1	3989871	436
100336	PRR15	HGNC:22310	CVI CM012323.1			Colubroidea					ENSG00000176532	7	29563811							Scaffold670	2572213	33	CM012323.1	37838761	26	scaffold233	2018995	27	ULFQ01000056.1	3979841	27
100337	SCRN1	HGNC:22192	CVI CM012323.1			Colubroidea					ENSG00000136193	7	29920103	ENSGALG00000011176	2	33940269	ENSACAG00000000877	6	35510210	Scaffold670	2653165	330	CM012323.1	37932600	327	scaffold770	140904	325	ULFQ01000056.1	3867783	321
100338	FKBP14	HGNC:18625	CVI CM012323.1			Colubroidea					ENSG00000106080	7	30010587	ENSGALG00000011181	2	33986621	ENSACAG00000000953	6	35488243	Scaffold670	2685091	164	CM012323.1	37957840	170	scaffold770	174424	165	ULFQ01000056.1	3850572	168
100339	PLEKHA8	HGNC:30037	CVI CM012323.1			Colubroidea					ENSG00000106086	7	30027404	ENSGALG00000011185	2	33992889	ENSACAG00000000988	6	35451519	Scaffold670	2692663	321	CM012323.1	37967582	317	scaffold770	181818	319	ULFQ01000056.1	3814926	323
100340	COLQ	HGNC:2226	CVI CM012323.1			Colubroidea					ENSG00000206561	3	15450133	ENSGALG00000011202	2	34025221	ENSACAG00000002275	6	35386115	Scaffold670	2740160	362	CM012323.1	38019989	315	scaffold770	229603	329	ULFQ01000056.1	3742545	286
100341	HACL1	HGNC:17856	CVI CM012323.1			Colubroidea					ENSG00000131373	3	15560704	ENSGALG00000011211	2	34070530	ENSACAG00000002368	6	35343279	Scaffold670	2796359	467	CM012323.1	38077268	443	scaffold770	297419	471	ULFQ01000056.1	3706692	452
100342	BTD	HGNC:1122	CVI CM012323.1			Colubroidea					ENSG00000169814	3	15601341	ENSGALG00000011216	2	34089580	ENSACAG00000002449	6	35329105	Scaffold670	2829014	367	CM012323.1	38111013	356	scaffold770	337593	357	ULFQ01000056.1	3688714	355
100343	ANKRD28	HGNC:29024	CVI CM012323.1			Colubroidea					ENSG00000206560	3	15667236	ENSGALG00000011226	2	34106867	ENSACAG00000002496	6	35268481	Scaffold670	2840986	1031	CM012323.1	38124393	1001	scaffold770	345280	1002	ULFQ01000056.1	3603269	990
100344	VMO1	HGNC:30387	CVI CM012323.1			Colubroidea											ENSACAG00000007746	6	35096256	Scaffold670	2973666	119	CM012323.1	38286263	134	scaffold770	491519	133	ULFQ01000056.1	3467394	130
100345	DPH3	HGNC:27717	CVI CM012323.1			Colubroidea					ENSG00000154813	3	16257978	ENSGALG00000011237	2	34366543	ENSACAG00000007752	6	35086952	Scaffold670	2983194	74	CM012323.1	38296430	71	scaffold770	505755	61	ULFQ01000056.1	3454329	72
100346	OXNAD1	HGNC:25128	CVI CM012323.1			Colubroidea					ENSG00000154814	3	16265160	ENSGALG00000011239	2	34369421	ENSACAG00000007757	6	35061614	Scaffold670	2996513	218	CM012323.1	38318574	214	scaffold770	517110	221	ULFQ01000056.1	3432750	168
100347	RFTN1	HGNC:30278	CVI CM012323.1			Colubroidea					ENSG00000131378	3	16313574	ENSGALG00000011241	2	34392684	ENSACAG00000007784	6	34925705	Scaffold670	3025054	371	CM012323.1	38352988	296	scaffold770	551883	311	ULFQ01000056.1	3321436	207
100348	DAZL	HGNC:2685	CVI CM012323.1			Colubroidea					ENSG00000092345	3	16586792	ENSGALG00000011243	2	34502237	ENSACAG00000007822	6	34873464	Scaffold670	3151453	264	CM012323.1	38444436	264	scaffold1801	6057	263	ULFQ01000056.1	3200051	263
100349	PLCL2	HGNC:9064	CVI CM012323.1			Colubroidea					ENSG00000154822	3	16802651	ENSGALG00000011248	2	34592366	ENSACAG00000007836	6	34681018	Scaffold670	3254752	1009	CM012323.1	38633543	974	scaffold762	154237	946	ULFQ01000056.1	2895585	911
100350	TBC1D5	HGNC:19166	CVI CM012323.1			Colubroidea					ENSG00000131374	3	17157162	ENSGALG00000011251	2	34723999	ENSACAG00000007864	6	34298821	Scaffold670	3374152	594	CM012323.1	38777903	608	scaffold762	286029	578	ULFQ01000056.1	2541689	591
100351	SATB1	HGNC:10541	CVI CM012323.1			Colubroidea					ENSG00000182568	3	18345387	ENSGALG00000011254	2	35245698	ENSACAG00000007941	6	33665512	Scaffold446	1854344	747	CM012323.1	39420731	746	scaffold762	946152	737	ULFQ01000056.1	1939513	729
100352	KCNH8	HGNC:18864	CVI CM012323.1			Colubroidea					ENSG00000183960	3	19148454	ENSGALG00000011262	2	35587263	ENSACAG00000000019	6	33107899	Scaffold446	1356285	1011	CM012323.1	39877059	981	scaffold780	342635	987	ULFQ01000056.1	1244334	954
100353	EFHB	HGNC:26330	CVI CM012323.1			Colubroidea					ENSG00000163576	3	19879472	ENSGALG00000011267	2	35934568	ENSACAG00000000018	6	32979477	Scaffold446	1252485	419	CM012323.1	40177911	399	scaffold780	631502	403	ULFQ01000056.1	1130325	210
100354	RAB5A	HGNC:9783	Published as ancestral sex-linked	Matsubara_et_al_2006:Fig_5; Matsubara_et_al_2012:Fig_1	ZW Pair	Colubroidea					ENSG00000064195	17	49990005	ENSGALG00000040529	27	3206023	ENSACAG00000005130	6	77129981	Scaffold932	1852661	274	CM012323.1	91064889	267	scaffold828	153980	266	ULFQ01000030.1	3708883	262
100355	PP2D1	HGNC:28406	CVI CM012323.1			Colubroidea					ENSG00000183977	3	19979961	ENSGALG00000044362	2	35975250	ENSACAG00000000016	6	32938536	Scaffold446	1221497	318	CM012323.1	40237607	270	scaffold780	705537	274	ULFQ01000056.1	1090475	306
100356	KAT2B	HGNC:8638	CVI CM012323.1			Colubroidea					ENSG00000114166	3	20040023	ENSGALG00000011278	2	35988108	ENSACAG00000000015	6	32865073	Scaffold446	1161334	714	CM012323.1	40252106	666	scaffold780	721650	713	ULFQ01000056.1	984940	721
100357	SGO1	HGNC:25088	CVI CM012323.1			Colubroidea					ENSG00000129810	3	20160593	ENSGALG00000011281	2	36030781	ENSACAG00000000014	6	32849361	Scaffold446	1148847	160	CM012323.1	40337141	137	scaffold780	796055	137	ULFQ01000056.1	974739	158
100358	ZNF385D	HGNC:26191	CVI CM012323.1			Colubroidea					ENSG00000151789	3	21412222	ENSGALG00000011283	2	36395146	ENSACAG00000000013	6	32194075	Scaffold446	594382	297	CM012323.1	40821745	358	scaffold964	126630	358	ULFQ01000056.1	213425	322
100359	UBE2E2	HGNC:12478	CVI CM012323.1			Colubroidea					ENSG00000182247	3	23203020	ENSGALG00000033593	2	36996138	ENSACAG00000011265	GL343357.1	850041	Scaffold446	46521	201	CM012323.1	41369315	197	scaffold1791	4898	168	ULFQ01000260.1	168687	196
100360	UBE2E1	HGNC:12477	Published as candidate W-linked	Vicoso_et_al_2013a:Dataset_S1(ENSACAG00000008926)	ZW Pair	Colubroidea		yes			ENSG00000104852	19	49085419	ENSGALG00000034738	AADN04013882.1	483	ENSACAG00000013276	6	80015560	Scaffold3668	185784	414	CM012323.1	93459045	411	scaffold1084	341009	409	ULFQ01000030.1	1171359	407
100361	NKIRAS1	HGNC:17899	CVI CM012323.1			Colubroidea					ENSG00000197885	3	23891660	ENSGALG00000011289	2	37318200	ENSACAG00000011317	GL343357.1	669718	Scaffold502	2295594	154	CM012323.1	41652037	133	scaffold473	163141	134	ULFQ01000260.1	462466	132
100362	RPL15	HGNC:10306	CVI CM012323.1			Colubroidea					ENSG00000174748	3	23916545	ENSGALG00000011290	2	37327222	ENSACAG00000011339	GL343357.1	660504	Scaffold502	2291286	203	CM012323.1	41657725	203	scaffold473	169491	202	ULFQ01000260.1	476400	203
100363	NR1D2	HGNC:7963	CVI CM012323.1			Colubroidea					ENSG00000174738	3	23945260	ENSGALG00000011291	2	37345920	ENSACAG00000011374	GL343357.1	624515	Scaffold502	2260707	427	CM012323.1	41688736	402	scaffold473	201054	415	ULFQ01000260.1	510979	380
100364	THRB	HGNC:11799	CVI CM012323.1			Colubroidea					ENSG00000151090	3	24117153	ENSGALG00000011294	2	37403149	ENSACAG00000011465	GL343357.1	452057	Scaffold502	2199466	454	CM012323.1	41741975	454	scaffold473	251373	456	ULFQ01000260.1	583356	453
100365	RARB	HGNC:9865	CVI CM012323.1			Colubroidea					ENSG00000077092	3	25174332	ENSGALG00000011298	2	37655934	ENSACAG00000009257	GL343380.1	790801	Scaffold502	1631854	435	CM012323.1	42458313	428	scaffold296	291897	429	ULFQ01000426.1	229253	335
100366	TOP2B	HGNC:11990	Published as candidate W-linked	Vicoso_et_al_2013a:Dataset_S1(ENSACAG00000008939)	ZW Pair	Colubroidea			yes		ENSG00000108312	17	44205033	ENSGALG00000042976	AADN04001028.1	1569	ENSACAG00000017186	6	66727345	Scaffold751	795546	676	CM012323.1	80660974	667	scaffold106	184702	666	ULFQ01000121.1	2972646	663
100367	NGLY1	HGNC:17646	CVI CM012323.1			Colubroidea					ENSG00000151092	3	25718944	ENSGALG00000011304	2	38055640	ENSACAG00000008852	GL343380.1	698381	Scaffold502	1553997	499	CM012323.1	42607190	444	scaffold296	188988	453	ULFQ01000426.1	121109	402
100368	OXSM	HGNC:26063	CVI CM012323.1			Colubroidea					ENSG00000151093	3	25782917	ENSGALG00000011312	2	38075126	ENSACAG00000008846	GL343380.1	684697	Scaffold502	1547816	371	CM012323.1	42638728	357	scaffold296	183974	359	ULFQ01000426.1	102476	360
100369	LRRC3B	HGNC:28105	CVI CM012323.1			Colubroidea					ENSG00000179796	3	26622806	ENSGALG00000011314	2	38358594	ENSACAG00000005952	GL343380.1	274383	Scaffold502	1292138	253	CM012323.1	42949604	256	scaffold1077	24713	256	ULFQ01000264.1	361445	256
100370	NEK10	HGNC:18592	CVI CM012323.1			Colubroidea					ENSG00000163491	3	27110085	ENSGALG00000040569	2	38549288	ENSACAG00000013795	1	196464921	Scaffold502	1058919	831	CM012323.1	43147182	791	scaffold1077	221898	779	ULFQ01000264.1	552610	646
100371	SLC4A7	HGNC:11033	CVI CM012323.1			Colubroidea					ENSG00000033867	3	27372721	ENSGALG00000011405	2	38586294	ENSACAG00000013876	1	196340229	Scaffold502	958136	1048	CM012323.1	43264494	1024	scaffold1077	369719	1023	ULFQ01000541.1	31804	1048
100372	EOMES	HGNC:3372	CVI CM012323.1			Colubroidea					ENSG00000163508	3	27715949	ENSGALG00000027247	2	38739416	ENSACAG00000014201	1	196231800	Scaffold502	895274	470	CM012323.1	43464314	465	scaffold1077	556475	469	ULFQ01000301.1	63939	461
100373	CMC1	HGNC:28783	CVI CM012323.1			Colubroidea					ENSG00000187118	3	28241584	ENSGALG00000025811	2	38923939	ENSACAG00000014240	1	196003792	Scaffold502	685367	64	CM012323.1	43695963	67	scaffold1077	751781	63	ULFQ01000301.1	334934	62
100374	AZI2	HGNC:24002	CVI CM012323.1			Colubroidea					ENSG00000163512	3	28315003	ENSGALG00000011428	2	38973380	ENSACAG00000014247	1	195977012	Scaffold502	663521	277	CM012323.1	43754827	266	scaffold1077	803083	239	ULFQ01000301.1	423594	263
100375	ZCWPW2	HGNC:23574	CVI CM012323.1			Colubroidea					ENSG00000206559	3	28349146							Scaffold502	652461	77	CM012323.1	43784221	78				ULFQ01000301.1	461795	66
100376	RTL3	HGNC:22997	BCO Scaffold502			Colubroidea					ENSG00000179300	X	78656069							Scaffold502	134517	22				W_scaffold2221	25116	32	ULFQ01006837.1	848	32
100377	RBMS3	HGNC:13427	CVI CM012323.1			Colubroidea					ENSG00000144642	3	28574791	ENSGALG00000011439	2	39599323	ENSACAG00000028664	1	194954141	Scaffold10460	113568	282	CM012323.1	44096559	377	scaffold716	129845	409	ULFQ01000154.1	1207146	390
100378	TGFBR2	HGNC:11773	CVI CM012323.1			Colubroidea					ENSG00000163513	3	30606502	ENSGALG00000011442	2	39945695	ENSACAG00000014301	1	194651238	Scaffold10460	508724	456	CM012323.1	44921913	456	scaffold716	933460	453	ULFQ01000154.1	865725	454
100379	GADL1	HGNC:27949	CVI CM012323.1			Colubroidea					ENSG00000144644	3	30726200	ENSGALG00000011447	2	40023360	ENSACAG00000014308	1	194473449	Scaffold494	11383	373	CM012323.1	44969218	421	scaffold716	997045	422	ULFQ01000154.1	735533	417
100380	STT3B	HGNC:30611	Published as ancestral sex-linked	Yin_et_al_2016:Supp_Fig_31	ZW Pair	Colubroidea	yes	yes	yes		ENSG00000126458	19	49635292				ENSACAG00000013955	6	80559594	Scaffold4163	928184	185	CM012323.1	92880623	182	scaffold1152	235251	181	ULFQ01000030.1	1773088	180
100381	DYNC1LI1	HGNC:18745	CVI CM012323.1			Colubroidea					ENSG00000144635	3	32525971	ENSGALG00000011491	2	40596311	ENSACAG00000014680	1	193476359	Scaffold494	628051	497	CM012323.1	45474684	450	scaffold465	412069	452	ULFQ01000300.1	295157	428
100382	OSBPL10	HGNC:16395	CVI CM012323.1			Colubroidea					ENSG00000144645	3	31657890	ENSGALG00000011474	2	40330244	ENSACAG00000014540	1	193738708	Scaffold494	409862	588	CM012323.1	45509240	534	scaffold465	162879	567	ULFQ01000154.1	42545	423
100383	GPD1L	HGNC:28956	CVI CM012323.1			Colubroidea					ENSG00000152642	3	32105689	ENSGALG00000011481	2	40461464	ENSACAG00000014627	1	193668509	Scaffold494	510219	326	CM012323.1	45584550	326	scaffold465	251352	325	ULFQ01000300.1	51865	322
100384	CMTM8	HGNC:19179	CVI CM012323.1			Colubroidea					ENSG00000170293	3	32238679	ENSGALG00000011484	2	40502114	ENSACAG00000029558	1	193613576	Scaffold494	411836	150	CM012323.1	45628672	138	scaffold465	284984	143	ULFQ01000300.1	111353	133
100385	CMTM7	HGNC:19178	CVI CM012323.1			Colubroidea					ENSG00000153551	3	32391671	ENSGALG00000011488	2	40542630				Scaffold494	586363	99	CM012323.1	45668618	113	scaffold465	344571	86	ULFQ01000300.1	175828	81
100386	CMTM6	HGNC:19177	DAC scaffold465			Colubroidea					ENSG00000091317	3	32481312	ENSGALG00000011490	2	40582217	ENSACAG00000014679	1	193544284	Scaffold494	618077	56	CM012318.1	9760189	26	scaffold465	401441	32	ULFQ01000042.1	318287	25
100387	CNOT10	HGNC:23817	CVI CM012323.1			Colubroidea					ENSG00000182973	3	32685145	ENSGALG00000011494	2	40640429	ENSACAG00000014782	1	193418519	Scaffold494	680650	687	CM012323.1	45796940	687	scaffold465	471899	680	ULFQ01000300.1	365708	681
100388	TRIM71	HGNC:32669	CVI CM012323.1			Colubroidea					ENSG00000206557	3	32818018	ENSGALG00000019622	2	40677658	ENSACAG00000014882	1	193362391	Scaffold494	715970	763	CM012323.1	45839455	735	scaffold465	507072	729	ULFQ01000300.1	424229	726
100389	TCAIM	HGNC:25241	CVI CM012323.1			Colubroidea					ENSG00000179152	3	44338119	ENSGALG00000011498	2	40755634	ENSACAG00000014913	1	193281447	Scaffold494	795613	376	CM012323.1	45974077	376	scaffold465	630157	376	ULFQ01000228.1	956932	387
100390	TOPAZ1	HGNC:24746	CVI CM012323.1			Colubroidea					ENSG00000173769	3	44241886				ENSACAG00000014946	1	193215507	Scaffold494	818694	312	CM012323.1	46001405	247	scaffold465	658069	155	ULFQ01000228.1	858470	186
100391	ABHD5	HGNC:21396	CVI CM012323.1			Colubroidea					ENSG00000011198	3	43690108	ENSGALG00000040363	2	40990423	ENSACAG00000014950	1	192888494	Scaffold494	1086300	328	CM012323.1	46533055	265	scaffold465	978375	326	ULFQ01000228.1	576892	328
100392	ANO10	HGNC:25519	CVI CM012323.1			Colubroidea					ENSG00000160746	3	43354859	ENSGALG00000042371	2	41037808	ENSACAG00000015012	1	192788684	Scaffold494	1144179	544	CM012323.1	46587405	545	scaffold465	1030732	548	ULFQ01000228.1	432497	545
100393	SNRK	HGNC:30598	Published as candidate W-linked	Vicoso_et_al_2013a:Dataset_S1(ENSACAG00000015044)	ZW Pair	Colubroidea		yes			ENSG00000168267	10	23192327	ENSGALG00000027144	2	17418895	ENSACAG00000008717	6	15956689	Scaffold1329	5654800	173	CM012323.1	24385029	172	scaffold1528	438909	171	ULFQ01000077.1	3323182	171
100394	POMGNT2	HGNC:25902	CVI CM012323.1			Colubroidea					ENSG00000144647	3	43079232	ENSGALG00000011518	2	41282455	ENSACAG00000003118	6	35847103	Scaffold494	1368354	539	CM012323.1	46850519	533	scaffold465	1276982	537	ULFQ01000228.1	142793	523
100395	RPL14	HGNC:10305	NSC ULFQ01000228.1			Colubroidea					ENSG00000188846	3	40457292	ENSGALG00000043379	2	41319152	ENSACAG00000003049	6	36030303	Scaffold494	1452036	128	CM012310.1	78411753	123	scaffold465	1314339	131	ULFQ01000228.1	82289	123
100396	GASK1A	HGNC:24485	DAC scaffold465			Colubroidea					ENSG00000144649	3	42979267	ENSGALG00000037533	2	41301075	ENSACAG00000003100	6	35938280	Scaffold494	1401739	267	CM012310.1	78367957	264	scaffold465	1315014	264
100397	ENTPD3	HGNC:3365	NSC ULFQ01000228.1			Colubroidea					ENSG00000168032	3	40387156	ENSGALG00000030493	2	41324891	ENSACAG00000002991	6	36042512	Scaffold494	1462216	456	CM012310.1	78421238	444	scaffold465	1376968	442	ULFQ01000228.1	55588	429
100398	GGCT	HGNC:21705	DAC scaffold465			Colubroidea					ENSG00000006625	7	30496621	ENSGALG00000030552	2	41370014	ENSACAG00000002984	6	36146828	Scaffold494	1508430	144	CM012310.1	78486594	143	scaffold465	1430286	136	ULFQ01002461.1	7639	65
100399	NOD1	HGNC:16390	NSC ULFQ01000284.1			Colubroidea					ENSG00000106100	7	30424527	ENSGALG00000036807	2	41382382	ENSACAG00000002919	6	36161303	Scaffold494	1524455	782	CM012310.1	78498994	767	scaffold465	1444673	763	ULFQ01000284.1	12074	768
100400	ZNRF2	HGNC:22316	NSC ULFQ01000284.1			Colubroidea					ENSG00000180233	7	30284307	ENSGALG00000031163	2	41413212	ENSACAG00000002896	6	36269665	Scaffold494	1580613	185	CM012310.1	78567871	180	scaffold465	1513151	179	ULFQ01000284.1	113821	140
100401	MTURN	HGNC:25457	NSC ULFQ01000284.1			Colubroidea					ENSG00000180354	7	30134810	ENSGALG00000029724	2	41508272	ENSACAG00000002891	6	36384887	Scaffold494	1671729	127	CM012310.1	78658711	68	scaffold465	1613596	116	ULFQ01000284.1	359899	117
100402	EAF1	HGNC:20907	NSC ULFQ01000284.1			Colubroidea					ENSG00000144597	3	15427355	ENSGALG00000033379	2	41529523	ENSACAG00000002832	6	36419765	Scaffold494	1699042	227	CM012307.1	207011964	231	scaffold465	1649336	225	ULFQ01000284.1	431962	226
100403	METTL6	HGNC:28343	NSC ULFQ01000284.1			Colubroidea					ENSG00000206562	3	15381275	ENSGALG00000040665	2	41548208	ENSACAG00000002806	6	36445540	Scaffold494	1711012	232	CM012307.1	207002863	225	scaffold465	1664730	223	ULFQ01000284.1	458872	208
100404	SH3BP5	HGNC:10827	CVI CM012323.1			Colubroidea					ENSG00000131370	3	15254853	ENSGALG00000039337	2	41589410	ENSACAG00000002737	6	36486603	Scaffold494	1735261	379	CM012323.1	46921178	365	scaffold465	1687019	346	ULFQ01000284.1	497999	357
100405	CAPN7	HGNC:1484	CVI CM012323.1			Colubroidea					ENSG00000131375	3	15206152	ENSGALG00000041731	2	41636922	ENSACAG00000002580	6	36574448	Scaffold494	1776480	757	CM012323.1	46957465	741	scaffold465	1729534	742	ULFQ01000284.1	608893	740
100406	COL6A3	HGNC:2213	CVI CM012323.1			Colubroidea											ENSACAG00000002516	6	36641104	Scaffold494	1828006	1262	CM012323.1	47013431	1198	scaffold465	1792178	1023	ULFQ01000161.1	1858351	103
100407	COL6A5	HGNC:26674	CVI CM012323.1			Colubroidea					ENSG00000172752	3	130345516	ENSGALG00000035854	2	41727970				Scaffold494	1914260	433	CM012323.1	47016810	321	scaffold1449	66014	283	ULFQ01000161.1	1856280	254
100408	COL6A6	HGNC:27023	CVI CM012323.1			Colubroidea					ENSG00000206384	3	130560334				ENSACAG00000002476	6	36766603	Scaffold494	1914227	1438	CM012323.1	47112548	1338	scaffold465	1882589	1360	ULFQ01000161.1	1856265	438
100409	COL6A6	HGNC:27023	CVI CM012323.1			Colubroidea					ENSG00000206384	3	130560334				ENSACAG00000002473	6	36945116	Scaffold494	2023484	980	CM012323.1	47226989	891	scaffold1449	65433	740	ULFQ01000161.1	1856250	855
100410	PIK3R4	HGNC:8982	CVI CM012323.1			Colubroidea					ENSG00000196455	3	130678935	ENSGALG00000040917	2	41741412	ENSACAG00000002333	6	37056834	Scaffold494	2090865	1231	CM012323.1	47287073	1221	scaffold1449	130025	1220	ULFQ01000161.1	1767040	1217
100411	ATP2C1	HGNC:13211	CVI CM012323.1			Colubroidea					ENSG00000017260	3	130850595	ENSGALG00000034340	2	41819152	ENSACAG00000001756	6	37152401	Scaffold364	446840	875	CM012323.1	47376689	871	scaffold145	51238	871	ULFQ01000161.1	1636687	861
100412	ASTE1	HGNC:25021	CVI CM012323.1			Colubroidea					ENSG00000034533	3	131013875	ENSGALG00000036171	2	41876496	ENSACAG00000001748	6	37221307	Scaffold364	436219	483	CM012323.1	47423298	397	scaffold145	92765	410	ULFQ01000161.1	1625143	422
100413	NEK11	HGNC:18593	CVI CM012323.1			Colubroidea					ENSG00000114670	3	131026850	ENSGALG00000037242	2	41882712	ENSACAG00000001691	6	37238498	Scaffold364	332370	396	CM012323.1	47432452	350	scaffold145	101487	392	ULFQ01000161.1	1415904	379
100414	MRPL3	HGNC:10379	Published as ancestral sex-linked	Matsubara_et_al_2012:Fig_1;Yin_et_al_2016:Supp_Data_1	Z-Linked	Colubroidea					ENSG00000114686	3	131462212	ENSGALG00000040873	2	42030778	ENSACAG00000001596	6	37466508	Scaffold364	243107	214	CM012307.1	114068370	209	scaffold145	292527	209	ULFQ01000161.1	1277003	238
100415	CPNE4	HGNC:2317	NSC ULFQ01000161.1			Colubroidea					ENSG00000196353	3	131533555	ENSGALG00000029235	2	42068943	ENSACAG00000001407	6	37520578	Scaffold364	97589	548	CM012307.1	113971720	491	scaffold145	347725	548	ULFQ01000161.1	921887	504
100416	ACP3	HGNC:125	CVI CM012323.1			Colubroidea					ENSG00000014257	3	132317367	ENSGALG00000030322	2	42336011	ENSACAG00000001334	6	37933056	Scaffold4667	639024	237	CM012323.1	47731262	220	scaffold145	686395	180	ULFQ01000161.1	492229	124
100417	DNAJC13	HGNC:30343	CVI CM012323.1			Colubroidea					ENSG00000138246	3	132417526	ENSGALG00000035068	2	42403642	ENSACAG00000000850	6	38044936	Scaffold4667	491392	2140	CM012323.1	47886492	2114	scaffold439	17714	2114	ULFQ01000161.1	252789	2097
100418	CCR9	HGNC:1610	BCO Scaffold4667			Colubroidea					ENSG00000173585	3	45886504	ENSGALG00000011808	2	42945010	ENSACAG00000022630	GL343324.1	273777	Scaffold4667	473360	41	CM012306.1	105916065	44	scaffold286	2476532	44	ULFQ01000471.1	6283	49
100419	ACAD11	HGNC:30211	CVI CM012323.1			Colubroidea					ENSG00000240303	3	132558138	ENSGALG00000035949	2	42421229	ENSACAG00000000712	6	38147455	Scaffold4667	452473	611	CM012323.1	47956879	516	scaffold439	84063	496	ULFQ01000161.1	125631	387
100420	UBA5	HGNC:23230	CVI CM012323.1			Colubroidea					ENSG00000081307	3	132654446	ENSGALG00000032382	2	42481365	ENSACAG00000000484	6	38196867	Scaffold4667	442023	330	CM012323.1	47988968	330	scaffold439	69735	318	ULFQ01000161.1	110287	303
100421	NPHP3	HGNC:7907	CVI CM012323.1			Colubroidea					ENSG00000113971	3	132680609	ENSGALG00000034586	2	42493148	ENSACAG00000000328	6	38213876	Scaffold4667	388839	1132	CM012323.1	48015187	1119	scaffold439	150223	1115	ULFQ01000161.1	1579	839
100422	XCR1	HGNC:1625	CVI CM012323.1			Colubroidea					ENSG00000173578	3	46017024	ENSGALG00000011735	2	42896266	ENSACAG00000014112	GL343324.1	392617	Scaffold4867	91395	193	CM012323.1	48226577	210	scaffold439	628888	202	ULFQ01000103.1	3253076	192
100423	TMEM108	HGNC:28451	CVI CM012323.1			Colubroidea					ENSG00000144868	3	133038391	ENSGALG00000036412	2	42607307	ENSACAG00000004468	GL343224.1	2360180	Scaffold4667	134827	219	CM012323.1	48249188	225	scaffold439	420653	226	ULFQ01000103.1	3661977	167
100424	BFSP2	HGNC:1041	CVI CM012323.1			Colubroidea					ENSG00000170819	3	133399995	ENSGALG00000034585	2	42762444	ENSACAG00000004403	GL343224.1	2334015	Scaffold4667	124506	289	CM012323.1	48302568	261	scaffold439	441481	300	ULFQ01000103.1	3629164	296
100425	CDV3	HGNC:26928	CVI CM012323.1			Colubroidea					ENSG00000091527	3	133573730	ENSGALG00000032316	2	42781752	ENSACAG00000004383	GL343224.1	2316556	Scaffold4667	112822	140	CM012323.1	48312344	135	scaffold439	451466	141	ULFQ01000103.1	3605017	138
100426	TOPBP1	HGNC:17008	CVI CM012323.1			Colubroidea					ENSG00000163781	3	133598175	ENSGALG00000034461	2	42796996	ENSACAG00000004246	GL343224.1	2267032	Scaffold4667	65758	908	CM012323.1	48330559	837	scaffold439	468538	843	ULFQ01000103.1	3452237	869
100427	CCRL2	HGNC:1612	CVI CM012323.1			Colubroidea					ENSG00000121797	3	46407163							Scaffold4667	27678	61	CM012323.1	48386257	55	scaffold439	566557	40	ULFQ01000103.1	3127363	66
100428	CCR2	HGNC:1603	CVI CM012323.1			Colubroidea					ENSG00000121807	3	46353734	ENSGALG00000011733	2	42849468	ENSACAG00000014097	GL343324.1	443935	Scaffold4667	27582	251	CM012323.1	48423946	242	scaffold439	566260	237	ULFQ01000103.1	3342060	241
100429	CCR5	HGNC:1606	CVI CM012323.1			Colubroidea					ENSG00000160791	3	46370854	ENSGALG00000011733	2	42849468	ENSACAG00000028320	GL343324.1	423588	Scaffold4667	27669	179	CM012323.1	48423955	146	scaffold439	566269	188	ULFQ01000103.1	3342135	188
100430	CCR3	HGNC:1604	CVI CM012323.1			Colubroidea					ENSG00000183625	3	46163604							Scaffold4667	27678	113	CM012323.1	48423991	116	scaffold439	566380	106	ULFQ01000103.1	3342138	115
100431	CCR1	HGNC:1602	CVI CM012323.1			Colubroidea					ENSG00000163823	3	46201709							Scaffold4667	27630	163	CM012323.1	48424081	112	scaffold439	566395	162	ULFQ01000103.1	3342090	157
100432	CCR8	HGNC:1609	CVI CM012323.1			Colubroidea					ENSG00000179934	3	39329706	ENSGALG00000038069	2	44531020				Scaffold4667	54621	84	CM012323.1	48424084	79	scaffold439	529313	101	ULFQ01000561.1	48073	98
100433	CXCR6	HGNC:16647	CVI CM012323.1			Colubroidea					ENSG00000172215	3	45940933				ENSACAG00000014156	GL343324.1	306530	Scaffold4867	42386	194	CM012323.1	48479378	190	scaffold439	688227	183	ULFQ01000103.1	3253805	26
100434	FYCO1	HGNC:14673	CVI CM012323.1			Colubroidea					ENSG00000163820	3	45917899	ENSGALG00000040212	2	42914367	ENSACAG00000014119	GL343324.1	290857	Scaffold4867	33699	883	CM012323.1	48489676	796	scaffold439	649596	884	ULFQ01000103.1	3088524	679
100435	LZTFL1	HGNC:6741	CVI CM012323.1			Colubroidea					ENSG00000163818	3	45823316	ENSGALG00000033928	2	42956292	ENSACAG00000014164	GL343324.1	255641	Scaffold4867	13386	253	CM012323.1	48546747	252	scaffold439	715632	235	ULFQ01000103.1	3040283	250
100436	SLC6A20	HGNC:30927	CVI CM012323.1			Colubroidea					ENSG00000163817	3	45755450	ENSGALG00000039333	2	42970198	ENSACAG00000014213	GL343324.1	221105	Scaffold17775	15683	463	CM012323.1	48569575	492	scaffold83	1596008	495	ULFQ01000103.1	2886953	487
100437	SNRPD1	HGNC:11158	CVI CM012323.1			Colubroidea					ENSG00000167088	18	21612267	ENSGALG00000041334	2	42981988	ENSACAG00000006364	GL343324.1	215253	Scaffold17775	10954	116	CM012323.1	48614574	116	scaffold83	1591386	116	ULFQ01000103.1	2882265	116
100438	SACM1L	HGNC:17059	CVI CM012323.1			Colubroidea					ENSG00000211456	3	45689056	ENSGALG00000040902	2	42989178	ENSACAG00000014430	GL343324.1	156619	Scaffold2782	1448265	504	CM012323.1	48638688	485	scaffold83	1545209	488	ULFQ01000103.1	2820479	484
100439	LIMD1	HGNC:6612	CVI CM012323.1			Colubroidea					ENSG00000144791	3	45555394	ENSGALG00000035623	2	43016450	ENSACAG00000014552	GL343324.1	108030	Scaffold2782	1399077	468	CM012323.1	48673065	405	scaffold83	1511384	389	ULFQ01000103.1	2721151	348
100440	LARS2	HGNC:17095	CVI CM012323.1			Colubroidea					ENSG00000011376	3	45388506	ENSGALG00000036309	2	43050041	ENSACAG00000014604	GL343324.1	3117	Scaffold2782	1306264	688	CM012323.1	48738972	699	scaffold83	1387344	648	ULFQ01000103.1	2479516	649
100441	TMEM158	HGNC:30293	CVI CM012323.1			Colubroidea					ENSG00000249992	3	45224466	ENSGALG00000034326	2	43188628	ENSACAG00000026199	GL343611.1	126057	Scaffold2782	1239218	162	CM012323.1	48872359	140	scaffold83	1292964	143	ULFQ01000103.1	2376729	152
100442	CDCP1	HGNC:24357	CVI CM012323.1			Colubroidea					ENSG00000163814	3	45082278	ENSGALG00000040447	2	43219475	ENSACAG00000004040	GL343611.1	212358	Scaffold2782	1168506	425	CM012323.1	48944348	347	scaffold83	1200289	391	ULFQ01000103.1	2214648	342
100443	CLEC3B	HGNC:11891	CVI CM012323.1			Colubroidea					ENSG00000163815	3	45001548	ENSGALG00000030969	2	43249990	ENSACAG00000004062	GL343611.1	320931	Scaffold2782	1143804	142	CM012323.1	48992546	143	scaffold83	1176167	145	ULFQ01000103.1	2148447	140
100444	EXOSC7	HGNC:28112	CVI CM012323.1			Colubroidea					ENSG00000075914	3	44975241	ENSGALG00000030084	2	43265788	ENSACAG00000004075	GL343611.1	354585	Scaffold2782	1109733	246	CM012323.1	49001618	240	scaffold83	1135943	245	ULFQ01000103.1	2006674	239
100445	ZDHHC3	HGNC:18470	CVI CM012323.1			Colubroidea					ENSG00000163812	3	44915257	ENSGALG00000029266	2	43286880	ENSACAG00000004129	GL343224.1	33415	Scaffold2782	1064154	281	CM012323.1	49042828	278	scaffold83	1098725	278	ULFQ01000103.1	1935214	280
100446	TGM4	HGNC:11780	CVI CM012323.1			Colubroidea					ENSG00000163810	3	44874608	ENSGALG00000033171	2	43317611	ENSACAG00000004168	GL343224.1	70493	Scaffold2782	1037616	336	CM012323.1	49076540	347	scaffold83	1072051	327	ULFQ01000540.1	45390	113
100447	KIF15	HGNC:17273	BCO Scaffold2782			Colubroidea					ENSG00000163808	3	44761717	ENSGALG00000036645	2	43344133	ENSACAG00000004317	GL343224.1	249538	Scaffold2782	948282	897	PDHV02000075.1	70414	112	scaffold757	738691	112	ULFQ01000731.1	45676	112
100448	KIAA1143	HGNC:29198	CVI CM012323.1			Colubroidea					ENSG00000163807	3	44737661	ENSGALG00000035952	2	43379263	ENSACAG00000004405	GL343224.1	295572	Scaffold1029	515032	113	CM012323.1	49136763	79	scaffold83	1005948	72	ULFQ01000103.1	1759902	75
100449	CTNNB1	HGNC:2514	Published as ancestral sex-linked	Matsubara_et_al_2006:Fig_5; Matsubara_et_al_2012:Fig_1; Vicoso_et_al_2013a:Dataset_S1(ENSACAG00000004408); Matsubara_et_al_2016:Fig_3; Yin_et_al_2016:Supp_Data_1; Perry_et_al_2018:Fig_3	ZW Pair	Colubroidea		yes			ENSG00000105063	19	55229780				ENSACAG00000017059	GL343355.1	1053621	Scaffold2907	1806837	689	CM012323.1	102453260	675	scaffold505	527197	686	ULFQ01000092.1	1298495	681
100450	ULK4	HGNC:15784	CVI CM012323.1			Colubroidea					ENSG00000168038	3	41246599	ENSGALG00000039440	2	43840426	ENSACAG00000004565	GL343224.1	1061566	Scaffold2971	517990	376	CM012323.1	49636857	675	scaffold83	408446	645
100451	TRAK1	HGNC:29947	CVI CM012323.1			Colubroidea					ENSG00000182606	3	42013802	ENSGALG00000038733	2	43879329	ENSACAG00000004124	GL343224.1	1312802	Scaffold2971	389875	916	CM012323.1	49765185	910	scaffold83	240320	895	ULFQ01000103.1	1057683	607
100452	CCK	HGNC:1569	CVI CM012323.1			Colubroidea					ENSG00000187094	3	42257825	ENSGALG00000029788	2	43988980	ENSACAG00000004398	GL343224.1	1385171	Scaffold2971	374253	99	CM012323.1	49895222	93	scaffold83	224196	75	ULFQ01000103.1	1024536	73
100453	EIF1B	HGNC:30792	CVI CM012323.1			Colubroidea					ENSG00000114784	3	40309684	ENSGALG00000038646	2	44126530	ENSACAG00000017884	GL343224.1	1597405	Scaffold2971	259096	113	CM012323.1	50022363	111	scaffold83	108352	111	ULFQ01000662.1	16105	103
100454	PRLH	HGNC:17945	CVI CM012323.1			Colubroidea								ENSGALG00000043381	2	44146929	ENSACAG00000022856	GL343224.1	1647411	Scaffold2971	244699	27	CM012323.1	50065471	27	scaffold83	90695	27
100455	MYRIP	HGNC:19156	CVI CM012323.1			Colubroidea					ENSG00000170011	3	39808914	ENSGALG00000030855	2	44262334	ENSACAG00000004434	GL343224.1	1658224	Scaffold2971	149575	626	CM012323.1	50071708	405	scaffold83	14880	487	ULFQ01000103.1	765482	460
100456	TMC2	HGNC:16527	CVI CM012323.1			Colubroidea					ENSG00000149488	20	2536607	ENSGALG00000042706	2	44470402	ENSACAG00000004125	GL343224.1	2086998	Scaffold2971	26206	623	CM012323.1	50201215	601	scaffold1215	412846	615	ULFQ01000103.1	445237	589
100457	RPSA	HGNC:6502	CVI CM012323.1			Colubroidea					ENSG00000168028	3	39406689	ENSGALG00000035079	2	44510182	ENSACAG00000004183	GL343224.1	2172674	Scaffold2971	18303	288	CM012323.1	50247719	288	scaffold1215	402437	288	ULFQ01000103.1	438154	288
100458	SLC25A38	HGNC:26054	CVI CM012323.1			Colubroidea					ENSG00000144659	3	39383324	ENSGALG00000041275	2	44525194	ENSACAG00000014069	GL343324.1	464498	Scaffold2971	1529	224	CM012323.1	50261846	219	scaffold1215	376712	219	ULFQ01000116.1	3391551	199
100459	CASP14	HGNC:1502	DAC scaffold1215			Colubroidea											ENSACAG00000014043	GL343324.1	516560	Scaffold3457	438034	66	CM012307.1	148071119	19	scaffold1215	352657	43	ULFQ01000281.1	488159	21
100460	CX3CR1	HGNC:2558	CVI CM012323.1			Colubroidea					ENSG00000168329	3	39263494	ENSGALG00000038000	2	44545657	ENSACAG00000014040	GL343324.1	552381	Scaffold3457	421613	222	CM012323.1	50300750	220	scaffold1215	341808	223	ULFQ01000561.1	47941	213
100461	CCR4	HGNC:1605	CVI CM012323.1			Colubroidea					ENSG00000183813	3	32951574	ENSGALG00000039146	2	44567230	ENSACAG00000014037	GL343324.1	573160	Scaffold3457	407559	239	CM012323.1	50310873	229	scaffold1215	326533	230	ULFQ01000103.1	3342138	148
100462	ACKR2	HGNC:1565	CVI CM012323.1			Colubroidea					ENSG00000144648	3	42804752	ENSGALG00000005305	2	2096559				Scaffold7286	1073426	44	CM012323.1	50311029	42	scaffold1215	327175	41	ULFQ01000013.1	14094958	29
100463	GLB1	HGNC:4298	CVI CM012323.1			Colubroidea					ENSG00000170266	3	32996608	ENSGALG00000040028	2	44582226	ENSACAG00000013765	GL343324.1	586953	Scaffold3457	361672	469	CM012323.1	50321099	458	scaffold1215	283878	467	ULFQ01000103.1	309626	453
100464	TMPPE	HGNC:33865	DAC scaffold1215			Colubroidea					ENSG00000188167	3	33090421							Scaffold3457	351589	27				scaffold1215	279799	47
100465	CRTAP	HGNC:2379	CVI CM012323.1			Colubroidea					ENSG00000170275	3	33113979	ENSGALG00000034163	2	44630413	ENSACAG00000013728	GL343324.1	693380	Scaffold3457	336597	321	CM012323.1	50364888	321	scaffold1215	265405	320	ULFQ01000103.1	242735	314
100466	SUSD5	HGNC:29061	BCO Scaffold3457			Colubroidea					ENSG00000173705	3	33150042	ENSGALG00000042289	2	44661561	ENSACAG00000028271	GL343324.1	720057	Scaffold3457	314901	215
100467	UBP1	HGNC:12507	CVI CM012323.1			Colubroidea					ENSG00000153560	3	33388336	ENSGALG00000035630	2	44786583	ENSACAG00000013565	GL343324.1	824088	Scaffold3457	239770	489	CM012323.1	50383335	447	scaffold1215	208274	450	ULFQ01000103.1	132923	461
100468	CLASP2	HGNC:17078	CVI CM012323.1			Colubroidea					ENSG00000163539	3	33496245	ENSGALG00000032647	2	44830189	ENSACAG00000013490	GL343324.1	912764	Scaffold3457	90957	1336	CM012323.1	50439122	1313	scaffold1215	2392	1329	ULFQ01000013.1	8504037	865
100469	PDCD6IP	HGNC:8766	CVI CM012323.1			Colubroidea					ENSG00000170248	3	33798352	ENSGALG00000033500	2	44987737	ENSACAG00000013370	GL343324.1	1160709	Scaffold3457	46023	791	CM012323.1	50629073	779	scaffold59	1017802	780	ULFQ01000119.1	2926912	688
100470	ARPP21	HGNC:16968	CVI CM012323.1			Colubroidea					ENSG00000172995	3	35638945	ENSGALG00000043240	2	45605960	ENSACAG00000010218	6	42606196	Scaffold1369	269700	671	CM012323.1	51591062	611	scaffold59	40330	613	ULFQ01000119.1	2553401	259
100471	STAC	HGNC:11353	CVI CM012323.1			Colubroidea					ENSG00000144681	3	36380344	ENSGALG00000039092	2	45916083	ENSACAG00000010185	6	43209135	Scaffold1369	671	294	CM012323.1	51985690	291	scaffold245	39108	294	ULFQ01000119.1	2265941	273
100472	DCLK3	HGNC:19005	CVI CM012323.1			Colubroidea					ENSG00000163673	3	36712422	ENSGALG00000034493	2	46064049	ENSACAG00000010167	6	43423759	Scaffold976	67031	490	CM012323.1	52115804	380	scaffold245	202859	403	ULFQ01000025.1	5473133	116
100473	TRANK1	HGNC:29011	CVI CM012323.1			Colubroidea					ENSG00000168016	3	36826820	ENSGALG00000037629	2	46111553	ENSACAG00000010154	6	43523882	Scaffold976	111519	1789	CM012323.1	52189065	1424	scaffold245	254486	1413	ULFQ01000190.1	312892	34
100474	MLH1	HGNC:7127	CVI CM012323.1			Colubroidea					ENSG00000076242	3	36993332	ENSGALG00000039169	2	46177380	ENSACAG00000010048	6	43631662	Scaffold976	187989	592	CM012323.1	52267196	557	scaffold245	321382	550	ULFQ01000119.1	2141301	552
100475	LRRFIP2	HGNC:6703	CVI CM012323.1			Colubroidea					ENSG00000093167	3	37052656	ENSGALG00000033102	2	49216004	ENSACAG00000009967	6	43779617	Scaffold976	227681	597	CM012323.1	52312996	495	scaffold245	381053	568	ULFQ01000119.1	2060510	580
100476	GOLGA4	HGNC:4427	Published as ancestral sex-linked	Gamble_et_al_2017:Table_S3	Z-Linked	Colubroidea					ENSG00000144674	3	37243177	ENSGALG00000041114	2	49128120	ENSACAG00000009896	6	43851261	Scaffold976	336235	1454	CM012323.1	52464768	1043	scaffold245	533893	1225	ULFQ01000119.1	1815422	818
100477	ITGA9	HGNC:6145	CVI CM012323.1			Colubroidea					ENSG00000144668	3	37452115	ENSGALG00000029378	2	48876022	ENSACAG00000009703	6	44033690	Scaffold976	412428	920	CM012323.1	52554752	915	scaffold245	613898	912	ULFQ01000119.1	1225537	816
100478	NEUROD6	HGNC:13804	CVI CM012323.1			Colubroidea					ENSG00000164600	7	31337461				ENSACAG00000009699	6	44530862	Scaffold976	744039	306	CM012323.1	52908944	304	scaffold245	966688	304	ULFQ01000119.1	939391	300
100479	ITPRID1	HGNC:27363	CVI CM012323.1			Colubroidea					ENSG00000180347	7	31514071				ENSACAG00000025242	6	44643908	Scaffold976	848956	134	CM012323.1	53053381	104	scaffold245	1100231	94	ULFQ01000022.1	10581926	53
100480	PPP1R17	HGNC:16973	CVI CM012323.1			Colubroidea					ENSG00000106341	7	31686715	ENSGALG00000036390	2	48651543	ENSACAG00000029261	6	44724749	Scaffold976	895575	95	CM012323.1	53111615	80	scaffold245	1153862	91
100481	PDE1C	HGNC:8776	CVI CM012323.1			Colubroidea					ENSG00000154678	7	31751179	ENSGALG00000039935	2	48353052	ENSACAG00000009537	6	44766895	Scaffold2121	946859	575	CM012323.1	53166816	568	scaffold245	1216229	569	ULFQ01000119.1	431366	553
100482	LSM5	HGNC:17162	CVI CM012323.1			Colubroidea					ENSG00000106355	7	32485332	ENSGALG00000041625	2	48282152	ENSACAG00000009530	AAWZ02041982	111	Scaffold2121	862164	81	CM012323.1	53452599	89	scaffold378	37561	89	ULFQ01000119.1	302295	88
100483	AVL9	HGNC:28994	CVI CM012323.1			Colubroidea					ENSG00000105778	7	32495426	ENSGALG00000041568	2	48244696	ENSACAG00000009458	6	45232688	Scaffold2121	823119	567	CM012323.1	53464229	540	scaffold378	55175	534	ULFQ01000119.1	203700	512
100484	KBTBD2	HGNC:21751	CVI CM012323.1			Colubroidea					ENSG00000170852	7	32868172	ENSGALG00000038704	2	48223317	ENSACAG00000009449	6	45275152	Scaffold2121	811888	607	CM012323.1	53518936	545	W_scaffold1240	6350	571	ULFQ01000119.1	188307	555
100485	LOC420748	CGNC:51336	CVI CM012323.1			Colubroidea								ENSGALG00000041407	2	48213676	ENSACAG00000029627	6	45296483	Scaffold2121	796292	442	CM012323.1	53550375	188	scaffold378	129736	164	ULFQ01000119.1	120576	219
100486	RP9	HGNC:10288	CVI CM012323.1			Colubroidea					ENSG00000164610	7	33094797	ENSGALG00000035453	2	48198262	ENSACAG00000009290	6	45311947	Scaffold2121	786098	140	CM012323.1	53559413	137	scaffold378	139015	144	ULFQ01000119.1	110920	138
100487	FKBP9	HGNC:3725	CVI CM012323.1			Colubroidea					ENSG00000122642	7	32957404	ENSGALG00000037669	2	48168111	ENSACAG00000009397	6	45339750	Scaffold2121	750012	496	CM012323.1	53587452	441	scaffold378	154545	486	ULFQ01000119.1	26951	468
100488	NT5C3A	HGNC:17820	CVI CM012323.1			Colubroidea					ENSG00000122643	7	33014113	ENSGALG00000031397	2	48139177	ENSACAG00000009342	6	45372794	Scaffold2121	709472	307	CM012323.1	53619852	304	scaffold378	184184	306	ULFQ01000119.1	3308	198
100489	BBS9	HGNC:30000	CVI CM012323.1			Colubroidea					ENSG00000122507	7	33129244	ENSGALG00000031650	2	47992444	ENSACAG00000009261	6	45417136	Scaffold2121	511000	698	CM012323.1	53702478	647	scaffold378	240519	666	ULFQ01000067.1	5674178	659
100490	BMPER	HGNC:24154	CVI CM012323.1			Colubroidea					ENSG00000164619	7	33904308	ENSGALG00000029811	2	47688331	ENSACAG00000009181	6	45726927	Scaffold2121	307891	561	CM012323.1	53956957	560	scaffold378	479542	543	ULFQ01000067.1	4936041	539
100491	FANCD2OS	HGNC:28623	CVI CM012323.1			Colubroidea					ENSG00000163705	3	10081317	ENSGALG00000045546	2	47672179	ENSACAG00000009180	6	45947439	Scaffold2121	300960	154	CM012323.1	54148120	148	scaffold378	706865	151	ULFQ01000067.1	4928083	147
100492	NPSR1	HGNC:23631	CVI CM012323.1			Colubroidea					ENSG00000187258	7	34658239	ENSGALG00000041820	2	47542030	ENSACAG00000007504	6	46122642	Scaffold2121	171977	250	CM012323.1	54250368	224	scaffold378	759688	241
100493	DPY19L1	HGNC:22205	CVI CM012323.1			Colubroidea					ENSG00000173852	7	34928876	ENSGALG00000038978	2	47460370	ENSACAG00000007502	6	46177198	Scaffold2121	92193	522	CM012323.1	54288732	526	scaffold378	857110	536	ULFQ01000067.1	4746111	517
100494	TBX20	HGNC:11598	CVI CM012323.1			Colubroidea					ENSG00000164532	7	35202430	ENSGALG00000032097	2	47403388	ENSACAG00000007473	6	46249211	Scaffold2121	25691	413	CM012323.1	54361419	410	scaffold378	967692	410	ULFQ01000067.1	4617038	392
100495	HERPUD2	HGNC:21915	CVI CM012323.1			Colubroidea					ENSG00000122557	7	35632659	ENSGALG00000040364	2	47182047	ENSACAG00000007436	6	46565263	Scaffold2782	161036	316	CM012323.1	54677619	296	scaffold378	1285701	314	ULFQ01000067.1	4057695	302
100496	SEPTIN7	HGNC:1717	Published as ancestral sex-linked	Vicoso_et_al_2013a:Dataset_S1(ENSACAG00000007341)	ZW Pair	Colubroidea		yes			ENSG00000104888	19	49429401				ENSACAG00000017314	GL343355.1	400983	Scaffold2907	1369908	543	CM012323.1	101927260	536	scaffold505	1025836	542	ULFQ01000092.1	1824715	535
100497	EEPD1	HGNC:22223	CVI CM012323.1			Colubroidea					ENSG00000122547	7	36153149	ENSGALG00000039983	2	46965662	ENSACAG00000007322	6	46839696	Scaffold2782	372394	487	CM012323.1	54933866	472	scaffold378	1566997	473	ULFQ01000067.1	3620648	461
100498	KIAA0895	HGNC:22206	CVI CM012323.1			Colubroidea					ENSG00000164542	7	36324221	ENSGALG00000036301	2	46937614	ENSACAG00000007307	6	46919161	Scaffold2782	424248	406	CM012323.1	54969067	368	scaffold378	1626172	379	ULFQ01000067.1	3573476	376
100499	ANLN	HGNC:14082	CVI CM012323.1			Colubroidea					ENSG00000011426	7	36389806	ENSGALG00000043642	2	46919278	ENSACAG00000003566	6	46963049	Scaffold2782	449264	703	CM012323.1	55009876	110	scaffold378	1654892	663	ULFQ01000067.1	3496751	657
100500	AOAH	HGNC:548	DAC scaffold378			Colubroidea					ENSG00000136250	7	36512949	ENSGALG00000035505	2	46830837	ENSACAG00000021042	6	47002640	Scaffold2782	493921	208	PDHV02000137.1	9212	44	scaffold378	1745721	209
100501	ELMO1	HGNC:16286	CVI CM012323.1			Colubroidea					ENSG00000155849	7	36854361	ENSGALG00000035492	2	46514678	ENSACAG00000017690	6	47159539	Scaffold2782	611931	699	CM012323.1	55042230	454	scaffold378	1849438	698	ULFQ01000067.1	3048733	696
100502	GPR141	HGNC:19997	BCO Scaffold1029			Colubroidea					ENSG00000187037	7	37683796	ENSGALG00000032363	2	46412221	ENSACAG00000022058	6	47707631	Scaffold1029	564771	123
100503	NME8	HGNC:16473	CVI CM012323.1			Colubroidea					ENSG00000086288	7	37848597	ENSGALG00000029677	2	46333773	ENSACAG00000017678	6	47767459	Scaffold1029	576669	214	CM012323.1	55359676	185	scaffold378	2313270	175	ULFQ01000067.1	2785525	148
100504	SFRP4	HGNC:10778	CVI CM012323.1			Colubroidea					ENSG00000106483	7	37905932	ENSGALG00000031997	2	46310717	ENSACAG00000017668	6	47778949	Scaffold1029	612827	188	CM012323.1	55418072	169	scaffold378	2368555	170	ULFQ01000067.1	2760371	171
100505	EPDR1	HGNC:17572	CVI CM012323.1			Colubroidea					ENSG00000086289	7	37683843	ENSGALG00000042063	2	46280772	ENSACAG00000017665	6	47811855	Scaffold1029	625180	160	CM012323.1	55427224	152	scaffold378	2376491	152	ULFQ01000067.1	2722615	150
100506	STARD3NL	HGNC:19169	CVI CM012323.1			Colubroidea					ENSG00000010270	7	38178222	ENSGALG00000033038	2	46196151	ENSACAG00000017658	6	47875665	Scaffold1029	679998	209	CM012323.1	55567218	201	scaffold1244	37677	203	ULFQ01000067.1	2537604	174
100507	AMPH	HGNC:471	Published as ancestral sex-linked	Matsubara_et_al_2006:Fig_5; Matsubara_et_al_2012:Fig_1; Yin_et_al_2016:Supp_Data_1	Z-Linked	Colubroidea					ENSG00000078053	7	38383704	ENSGALG00000032958	2	49313942	ENSACAG00000017651	6	47909090	Scaffold1029	702597	469	CM012323.1	55586576	470	scaffold3945	1868	260	ULFQ01000067.1	2353601	456
100508	VPS41	HGNC:12713	CVI CM012323.1			Colubroidea					ENSG00000006715	7	38722963	ENSGALG00000031635	2	49443503	ENSACAG00000017617	6	48028572	Scaffold1029	803515	777	CM012323.1	55707630	787	scaffold2069	52630	713	ULFQ01000067.1	2164397	785
100509	LOC420562	CGNC:51288	CVI CM012323.1			Colubroidea								ENSGALG00000035994	2	23387591	ENSACAG00000028975	6	21972458	Scaffold1230	129133	323	CM012323.1	55723018	181	scaffold657	276387	291	ULFQ01000077.1	1614884	278
100510	BET1	HGNC:14562	CVI CM012323.1			Colubroidea					ENSG00000105829	7	93962762	ENSGALG00000024485	2	23421226	ENSACAG00000013288	6	22017499	Scaffold1230	111792	104	CM012323.1	55738589	107	scaffold657	263461	107	ULFQ01000077.1	1717091	106
100511	POU6F2	HGNC:21694	CVI CM012323.1			Colubroidea					ENSG00000106536	7	38977998	ENSGALG00000031713	2	49640512	ENSACAG00000026128	6	48235250	Scaffold1029	1033855	591	CM012323.1	55973883	553	scaffold136	150470	537	ULFQ01000067.1	1612855	534
100512	YAE1	HGNC:24857	CVI CM012323.1			Colubroidea					ENSG00000241127	7	39566376	ENSGALG00000043636	2	49979496	ENSACAG00000017609	6	48790767	Scaffold1029	1433186	55	CM012323.1	56430564	54	scaffold136	542363	83	ULFQ01000067.1	1481319	23
100513	RALA	HGNC:9839	CVI CM012323.1			Colubroidea					ENSG00000006451	7	39623483	ENSGALG00000031893	2	50015463	ENSACAG00000017605	6	48833014	Scaffold1029	1495278	203	CM012323.1	56469043	202	scaffold136	575008	202	ULFQ01000067.1	1419591	202
100514	CDK13	HGNC:1733	Published as ancestral sex-linked	Yin_et_al_2016:Supp_Fig_30(ENSACAG00000017597)	ZW Pair	Colubroidea	yes		yes		ENSG00000167258	17	39461511	ENSGALG00000001731	27	4573382	ENSACAG00000017541	6	67783549	Scaffold751	1705389	1050	CM012323.1	81610872	970	scaffold328	2226453	974	ULFQ01000121.1	1974518	987
100515	MPLKIP	HGNC:16002	CVI CM012323.1			Colubroidea					ENSG00000168303	7	40126023	ENSGALG00000031294	2	50143233	ENSACAG00000017596	6	48917705	Scaffold1029	1582996	70	CM012323.1	56533422	66	scaffold136	646171	63	ULFQ01000067.1	1263974	53
100516	SUGCT	HGNC:16001	CVI CM012323.1			Colubroidea					ENSG00000175600	7	40134977	ENSGALG00000031758	2	50150482	ENSACAG00000017581	6	48933040	Scaffold1029	1595972	230	CM012323.1	56550083	274	scaffold136	663414	270	ULFQ01000067.1	831227	272
100517	INHBA	HGNC:6066	CVI CM012323.1			Colubroidea					ENSG00000122641	7	41667168	ENSGALG00000034616	2	50747740	ENSACAG00000017576	6	49715246	Scaffold689	1399888	376	CM012323.1	57334523	353	scaffold115	118249	355	ULFQ01000468.1	43112	243
100518	GLI3	HGNC:4319	CVI CM012323.1			Colubroidea					ENSG00000106571	7	41960950	ENSGALG00000040266	2	50875914	ENSACAG00000017547	6	49909134	Scaffold689	1048445	1225	CM012323.1	57810495	1095	scaffold115	384652	981	ULFQ01000535.1	189531	593
100519	C7orf25	HGNC:21703	CVI CM012323.1			Colubroidea					ENSG00000136197	7	42908726	ENSGALG00000040161	2	51316212	ENSACAG00000017546	6	50513945	Scaffold689	744556	342	CM012323.1	58561260	325	scaffold6	557635	325	ULFQ01000357.1	337447	328
100520	PSMA2	HGNC:9531	Published as ancestral sex-linked	Vicoso_et_al_2013a:Dataset_S1(ENSACAG00000017511)	ZW Pair	Colubroidea		yes			ENSG00000133265	19	55262231	ENSGALG00000042503	AADN04001595.1	21065	ENSACAG00000017041	GL343355.1	1113982	Scaffold2907	1871866	304	CM012323.1	102518933	287	scaffold505	485052	308	ULFQ01000092.1	1235680	302
100521	MRPL32	HGNC:14035	CVI CM012323.1			Colubroidea					ENSG00000106591	7	42932200	ENSGALG00000037258	2	51330705	ENSACAG00000017508	6	50532163	Scaffold689	727332	123	CM012323.1	58581960	109	scaffold6	577090	111	ULFQ01000357.1	385301	110
100522	HECW1	HGNC:22195	CVI CM012323.1			Colubroidea					ENSG00000002746	7	43112599	ENSGALG00000037193	2	51429079	ENSACAG00000017492	6	50595885	Scaffold689	459265	1493	CM012323.1	58710509	1408	scaffold589	202545	1225	ULFQ01000186.1	1191600	1425
100523	STK17A	HGNC:11395	CVI CM012323.1			Colubroidea					ENSG00000164543	7	43582758	ENSGALG00000031117	2	51671799	ENSACAG00000017481	6	50814562	Scaffold689	421213	330	CM012323.1	59002569	298	scaffold589	147424	303	ULFQ01000186.1	1127760	271
100524	COA1	HGNC:21868	CVI CM012323.1			Colubroidea					ENSG00000106603	7	43608456	ENSGALG00000039725	2	51702847	ENSACAG00000028687	6	50850024	Scaffold689	409679	55	CM012323.1	59043327	51	scaffold589	134454	36	ULFQ01000186.1	1114439	36
100525	FIGNL1	HGNC:13286	CVI CM012323.1			Colubroidea					ENSG00000132436	7	50444128	ENSGALG00000026363	2	81004787	ENSACAG00000026371	6	50899205	Scaffold689	377452	435	CM012323.1	59094070	412	scaffold589	91064	423	ULFQ01000186.1	1034391	413
100526	BLVRA	HGNC:1062	CVI CM012323.1			Colubroidea					ENSG00000106605	7	43758680	ENSGALG00000031786	2	51764995	ENSACAG00000017470	6	50952171	Scaffold689	322304	244	CM012323.1	59138122	245	scaffold589	20452	246	ULFQ01000186.1	970427	242
100527	VOPP1	HGNC:34518	CVI CM012323.1			Colubroidea					ENSG00000154978	7	55436056	ENSGALG00000042773	2	51842819				Scaffold689	255294	123	CM012323.1	59218997	107	scaffold1240	36207	122	ULFQ01000186.1	888952	118
100528	LANCL2	HGNC:6509	CVI CM012323.1			Colubroidea					ENSG00000132434	7	55365448	ENSGALG00000032570	2	51920389	ENSACAG00000017463	6	51052644	Scaffold689	223679	353	CM012323.1	59237625	348	scaffold1240	61060	352	ULFQ01000186.1	819921	350
100529	EGFR	HGNC:3236	CVI CM012323.1			Colubroidea					ENSG00000146648	7	55019021	ENSGALG00000038089	2	51987050	ENSACAG00000017406	6	51109057	Scaffold689	154697	929	CM012323.1	59307110	917	scaffold1240	114859	919	ULFQ01000186.1	735540	903
100530	TCHH	HGNC:11791	CVI CM012323.1			Colubroidea											ENSACAG00000017390	6	51408195	Scaffold53521	249	405	CM012323.1	59756579	628	scaffold491	146560	590	ULFQ01000186.1	390104	569
100531	SEC61G	HGNC:18277	CVI CM012323.1			Colubroidea					ENSG00000132432	7	54752250	ENSGALG00000037863	2	52289895	ENSACAG00000028607	6	51423605	Scaffold2702	19078	66	CM012323.1	59774258	66	scaffold491	168671	66	ULFQ01000186.1	381666	66
100532	TPK1	HGNC:17358	CVI CM012323.1			Colubroidea					ENSG00000196511	7	144451941	ENSGALG00000040298	2	52848375	ENSACAG00000017381	6	51428941	Scaffold2892	10111	153	CM012323.1	59781639	192	scaffold491	175100	123	ULFQ01000186.1	65767	177
100533	CNTNAP2	HGNC:13830	CVI CM012323.1			Colubroidea					ENSG00000174469	7	146116002	ENSGALG00000031971	2	53779951	ENSACAG00000013647	6	52782447	Scaffold1158	220606	1054	CM012323.1	61364539	1032	scaffold163	354999	1026	ULFQ01000167.1	833255	1027
100534	CUL1	HGNC:2551	CVI CM012323.1			Colubroidea					ENSG00000055130	7	148697914	ENSGALG00000036941	2	54413610	ENSACAG00000013756	6	53299772	Scaffold1158	111659	769	CM012323.1	62251501	768	scaffold163	224554	768	ULFQ01000167.1	1533952	766
100535	EZH2	HGNC:3527	Published as ancestral sex-linked	Vicoso_et_al_2013a:Dataset_S1(ENSACAG00000013910)	ZW Pair	Colubroidea		yes	yes		ENSG00000159202	17	48908369	ENSGALG00000001315	27	3695957	ENSACAG00000006311	6	75952159	Scaffold932	731067	323	CM012323.1	89730246	320	scaffold105	3373216	318	ULFQ01000030.1	5098875	316
100536	PDIA4	HGNC:30167	Published as ancestral sex-linked	Gamble_et_al_2017:Table_S3	Z-Linked	Colubroidea					ENSG00000155660	7	149003062	ENSGALG00000043006	2	54571127	ENSACAG00000014123	6	53454784	Scaffold1158	1106	383	CM012323.1	62522593	516	scaffold163	32067	525	ULFQ01000167.1	1735852	539
100537	GLRX5	HGNC:20134	CVI CM012323.1			Colubroidea					ENSG00000182512	14	95533503	ENSGALG00000011079	5	46145046	ENSACAG00000014188	6	53488724	Scaffold11785	126218	114	CM012323.1	62602331	125	scaffold2097	35722	125	ULFQ01000167.1	1791870	113
100538	CHST14	HGNC:24464	CVI CM012323.1			Colubroidea					ENSG00000169105	15	40470998	ENSGALG00000026531	5	830916	ENSACAG00000026629	6	53505582	Scaffold11785	118087	269	CM012323.1	62611211	258	scaffold2097	29853	257	ULFQ01000167.1	1799654	264
100539	PIGA	HGNC:8957	CVI CM012323.1			Colubroidea					ENSG00000165195	X	15319451	ENSGALG00000016559	1	122087633	ENSACAG00000007906	6	53507985	Scaffold11785	103449	406	CM012323.1	62617929	397	scaffold2097	16060	398	ULFQ01000167.1	1806851	237
100540	RAMP3	HGNC:9845	CVI CM012323.1			Colubroidea					ENSG00000122679	7	45157791	ENSGALG00000037246	2	54647530	ENSACAG00000007918	GL344190.1	42736	Scaffold11785	13871	95	CM012323.1	62725921	91	scaffold1053	126145	60	ULFQ01000150.1	2068092	92
100541	ADCY1	HGNC:232	CVI CM012323.1			Colubroidea					ENSG00000164742	7	45574140	ENSGALG00000031170	2	54881741	ENSACAG00000007921	6	53652888	Scaffold1039	261574	1067	CM012323.1	63695869	1035	scaffold955	31690	645	ULFQ01000150.1	1284068	1004
100542	IGFBP1	HGNC:5469	CVI CM012323.1			Colubroidea					ENSG00000146678	7	45888357	ENSGALG00000043493	2	55087644	ENSACAG00000008063	6	53856876	Scaffold1039	501184	163	CM012323.1	64203072	149	scaffold622	74375	144	ULFQ01000150.1	1200858	137
100543	IGFBP3	HGNC:5472	CVI CM012323.1			Colubroidea					ENSG00000146674	7	45912245	ENSGALG00000037940	2	55103568	ENSACAG00000008077	6	53876086	Scaffold1039	516872	203	CM012323.1	64253702	181	scaffold656	12744	156	ULFQ01000150.1	1155744	218
100544	TNS3	HGNC:21616	NSC ULFQ01000150.1			Colubroidea					ENSG00000136205	7	47275154	ENSGALG00000039139	2	55221387	ENSACAG00000008102	6	53925584	Scaffold3152	193988	839	CM012306.1	106242065	433	scaffold286	2890880	401	ULFQ01000150.1	485766	642
100545	HUS1	HGNC:5309	CVI CM012323.1			Colubroidea					ENSG00000136273	7	47963288	ENSGALG00000039589	2	55476869	ENSACAG00000008129	6	53962631	Scaffold3152	198	186	CM012323.1	64473144	216	scaffold392	30314	231	ULFQ01000150.1	401005	227
100546	SUN3	HGNC:22429	NSC ULFQ01000150.1			Colubroidea					ENSG00000164744	7	47987148	ENSGALG00000013105	2	79814446				Scaffold5528	104836	31	CM012311.1	49618696	31	scaffold130	1539509	31	ULFQ01000150.1	395672	51
100547	UPP1	HGNC:12576	CVI CM012323.1			Colubroidea					ENSG00000183696	7	48088628	ENSGALG00000013073	2	80187888				Scaffold11928	71476	238	CM012323.1	64661494	230	scaffold392	207763	232	ULFQ01000150.1	312035	233
100548	C7orf57	HGNC:22247	CVI CM012323.1			Colubroidea					ENSG00000164746	7	48035511				ENSACAG00000008160	6	54040688	Scaffold11928	20019	125	CM012323.1	64911401	92	scaffold392	387303	91	ULFQ01000150.1	268740	95
100549	VWC2	HGNC:30200	CVI CM012323.1			Colubroidea					ENSG00000188730	7	49773661	ENSGALG00000013081	2	80750430	ENSACAG00000008190	6	54105067	Scaffold118	514005	275	CM012323.1	65017079	239	scaffold951	35192	261	ULFQ01000788.1	66047	170
100550	ZPBP	HGNC:15662	CVI CM012323.1			Colubroidea					ENSG00000042813	7	49850421	ENSGALG00000013083	2	80813280	ENSACAG00000008197	6	54151446	Scaffold118	605461	209	CM012323.1	65222455	205	scaffold951	235139	179	ULFQ01000100.1	3864660	121
100551	SPATA48	HGNC:22564	CVI CM012323.1			Colubroidea					ENSG00000164500	7	50096036				ENSACAG00000008234	6	54189447	Scaffold118	636719	37	CM012323.1	65295702	37	scaffold951	321922	38	ULFQ01000100.1	3844611	38
100552	IKZF1	HGNC:13176	CVI CM012323.1			Colubroidea					ENSG00000185811	7	50304068	ENSGALG00000013086	2	80928032	ENSACAG00000008236	6	54285713	Scaffold118	793289	465	CM012323.1	65777218	415	scaffold958	45641	475	ULFQ01000100.1	3653012	479
100553	DDC	HGNC:2719	CVI CM012323.1			Colubroidea					ENSG00000132437	7	50458436	ENSGALG00000013094	2	81012156	ENSACAG00000008272	6	54416220	Scaffold118	889935	392	CM012323.1	65978268	340	scaffold815	3596	305	ULFQ01000100.1	3570043	343
100554	GRB10	HGNC:4564	CVI CM012323.1			Colubroidea					ENSG00000106070	7	50590063	ENSGALG00000013100	2	81116137	ENSACAG00000008430	6	54497330	Scaffold118	972987	542	CM012323.1	66234347	511	scaffold850	127791	516	ULFQ01000100.1	3452153	502
100555	COBL	HGNC:22199	CVI CM012323.1			Colubroidea					ENSG00000106078	7	51016212	ENSGALG00000013102	2	81330751	ENSACAG00000008550	6	54638172	Scaffold118	1126054	404	CM012323.1	66724616	108	scaffold1333	28700	144	ULFQ01000100.1	2910577	224
100556	EXOC3	HGNC:30378	CVI CM012323.1			Colubroidea					ENSG00000180104	5	443158	ENSGALG00000013397	2	89212619	ENSACAG00000008565	6	54765821	Scaffold3641	29133	701	CM012323.1	66773958	554	scaffold946	22340	696	ULFQ01000100.1	3170357	693
100557	PDCD6	HGNC:8765	CVI CM012323.1			Colubroidea					ENSG00000249915	5	271621	ENSGALG00000013400	2	89230899	ENSACAG00000028414	6	54797086	Scaffold3641	3918	160	CM012323.1	66891926	130	scaffold946	121329	157	ULFQ01000100.1	3144827	160
100558	MSANTD3	HGNC:23370	CVI CM012323.1			Colubroidea					ENSG00000066697	9	100427156	ENSGALG00000013403	2	89391913	ENSACAG00000025458	6	54868107	Scaffold4402	12290	254	CM012323.1	67001873	253	scaffold946	248994	253	ULFQ01000100.1	3116524	251
100559	TEX10	HGNC:25988	CVI CM012323.1			Colubroidea					ENSG00000136891	9	100302077	ENSGALG00000013438	2	89428292	ENSACAG00000008774	6	54968388	Scaffold4402	36611	621	CM012323.1	67092995	528	scaffold594	25727	564	ULFQ01000100.1	3028774	568
100560	INVS	HGNC:17870	CVI CM012323.1			Colubroidea					ENSG00000119509	9	100099256	ENSGALG00000013441	2	89477955	ENSACAG00000008807	6	55027608	Scaffold4402	83558	553	CM012323.1	67274717	594	scaffold1000	35839	519	ULFQ01000100.1	2920038	639
100561	ERP44	HGNC:18311	CVI CM012323.1			Colubroidea					ENSG00000023318	9	99979179	ENSGALG00000013452	2	89563149	ENSACAG00000008917	6	55104037	Scaffold6813	6508	363	CM012323.1	67520035	354	scaffold1375	39176	354	ULFQ01000100.1	2847983	352
100562	NR4A3	HGNC:7982	CVI CM012323.1			Colubroidea					ENSG00000119508	9	99821855	ENSGALG00000013568	2	89674440	ENSACAG00000008988	6	55233036	Scaffold6813	141897	516	CM012323.1	67825132	464	scaffold2054	26347	476	ULFQ01000100.1	2781209	485
100563	TOX4	HGNC:20161	CVI CM012323.1			Colubroidea					ENSG00000092203	14	21476597				ENSACAG00000002921	GL343466.1	470167	Scaffold2789	132859	560	CM012323.1	67938120	515	scaffold189	149513	559	ULFQ01000211.1	1024484	558
100564	CHD8	HGNC:20153	NSC ULFQ01000211.1			Colubroidea					ENSG00000100888	14	21385194	ENSGALG00000036191	AADN04014142.1	878	ENSACAG00000003139	GL343466.1	403687	Scaffold2789	54040	2235	CM012311.1	68988888	1382	scaffold189	236177	2225	ULFQ01000211.1	902688	2240
100565	SUPT16H	HGNC:11465	NSC ULFQ01000211.1			Colubroidea					ENSG00000092201	14	21351472				ENSACAG00000003193	GL343466.1	381219	Scaffold2789	32846	987	CM012311.1	68950221	916	scaffold189	316726	972	ULFQ01000211.1	856248	974
100566	RPGRIP1	HGNC:13436	NSC ULFQ01000211.1			Colubroidea					ENSG00000092200	14	21287939				ENSACAG00000003274	GL343466.1	353349	Scaffold2789	10280	548	CM012311.1	68928247	314	scaffold189	351847	469	ULFQ01000211.1	813278	446
100567	SEC61B	HGNC:16993	CVI CM012323.1			Colubroidea					ENSG00000106803	9	99222064	ENSGALG00000013569	2	90002436	ENSACAG00000009059	6	55622256	Scaffold8136	11429	93	CM012323.1	68213478	92	scaffold1531	103570	92	ULFQ01000100.1	2564101	92
100568	ALG2	HGNC:23159	CVI CM012323.1			Colubroidea					ENSG00000119523	9	99216426	ENSGALG00000013573	2	90006995	ENSACAG00000009062	6	55626830	Scaffold8136	6633	291	CM012323.1	68233521	304	scaffold1531	98795	306	ULFQ01000100.1	2560766	288
100569	TPPP	HGNC:24164	BCO Scaffold5329			Colubroidea					ENSG00000171368	5	659862	ENSGALG00000042784	2	55779638	ENSACAG00000009421	6	56161991	Scaffold5329	79524	153	CM012318.1	9587278	100	scaffold386	4927136	107	ULFQ01004883.1	916	103
100570	BRD9	HGNC:25818	NSC ULFQ01000175.1			Colubroidea					ENSG00000028310	5	850291	ENSGALG00000031260	2	55725630	ENSACAG00000009383	6	56079009	Scaffold5329	146491	548	CM012309.1	56519521	542	scaffold1601	43093	545	ULFQ01000100.1	2129836	386
100571	TRIP13	HGNC:12307	NSC ULFQ01000175.1			Colubroidea					ENSG00000071539	5	892643	ENSGALG00000033834	2	55710333	ENSACAG00000009324	6	56050049	Scaffold5329	225038	381	CM012309.1	56605866	377	scaffold1601	236712	378	ULFQ01000100.1	2209160	351
100572	TGFBR1	HGNC:11772	NSC ULFQ01000175.1			Colubroidea					ENSG00000106799	9	99104038	ENSGALG00000033179	2	56104804	ENSACAG00000009195	6	55820487	Scaffold5329	259436	455	CM012309.1	56655097	440	scaffold1557	164945	441	ULFQ01000100.1	2230822	437
100573	RECK	HGNC:11345	CVI CM012323.1			Colubroidea					ENSG00000122707	9	36036433	ENSGALG00000036829	2	56151866	ENSACAG00000009097	6	55739974	Scaffold2842	30265	557	CM012323.1	68418510	756	scaffold1405	25786	404	ULFQ01000100.1	2281690	802
100574	ZPBP	HGNC:15662	CVI CM012323.1			Colubroidea								ENSGALG00000046069	27	2446126	ENSACAG00000028982	6	55698816	Scaffold4643	7461	201	CM012323.1	68635206	205	scaffold583	4732	152	ULFQ01000100.1	2395470	142
100575	GLIPR2	HGNC:18007	CVI CM012323.1			Colubroidea					ENSG00000122694	9	36136536	ENSGALG00000028821	2	90052383	ENSACAG00000009084	6	55678156	Scaffold7001	59211	136	CM012323.1	68834793	131	scaffold2199	85466	132	ULFQ01000100.1	2466373	137
100576	LRRC36	HGNC:25615	DAC scaffold1103			Colubroidea					ENSG00000159708	16	67326798							Scaffold15626	60296	39				scaffold1103	21772	36
100577	CEP72	HGNC:25547	CVI CM012323.1			Colubroidea					ENSG00000112877	5	612272				ENSACAG00000029204	6	56223437	Scaffold15626	57413	195	CM012323.1	68971534	196	scaffold1103	9511	166	ULFQ01000100.1	2053050	213
100578	SLC9A3	HGNC:11073	CVI CM012323.1			Colubroidea					ENSG00000066230	5	470458	ENSGALG00000039738	2	55891323	ENSACAG00000009460	6	56341685	Scaffold1641	115204	619	CM012323.1	69251461	641	scaffold1057	122964	620	ULFQ01000100.1	1930412	623
100579	TMEM245	HGNC:1363	CVI CM012323.1			Colubroidea					ENSG00000106771	9	109015152	ENSGALG00000013138	2	84481094	ENSACAG00000006922	6	57422084	Scaffold1641	24864	449	CM012323.1	69481067	555	scaffold1057	7122	349	ULFQ01000100.1	1859991	356
100580	FRRS1L	HGNC:1362	CVI CM012323.1			Colubroidea					ENSG00000260230	9	109130293	ENSGALG00000025792	2	84566772	ENSACAG00000006933	6	57403931	Scaffold745	216360	206	CM012323.1	69763786	224	scaffold1299	3072	226	ULFQ01000100.1	1797871	225
100581	MOCOS	HGNC:18234	NSC ULFQ01000175.1			Colubroidea					ENSG00000075643	18	36187519	ENSGALG00000013149	2	85073411	ENSACAG00000007096	6	57059385	Scaffold745	78404	417	CM012308.1	175735247	408	scaffold1299	175881	422	ULFQ01000100.1	1737652	433
100582	ZNF830	HGNC:28291	NSC ULFQ01000175.1			Colubroidea					ENSG00000198783	17	34961530	ENSGALG00000013156	2	85892784	ENSACAG00000009799	6	56670043	Scaffold7468	4890	182	CM012308.1	175631757	97	scaffold1472	33488	145	ULFQ01000100.1	1688670	160
100583	BAG1	HGNC:937	CVI CM012323.1			Colubroidea					ENSG00000107262	9	33247820	ENSGALG00000013157	2	85906463				Scaffold18841	27804	150	CM012323.1	69950539	135	scaffold406	27286	108	ULFQ01000100.1	1628566	141
100584	CHMP5	HGNC:26942	CVI CM012323.1			Colubroidea					ENSG00000086065	9	33264879	ENSGALG00000013160	2	85916370	ENSACAG00000029148	6	56621672	Scaffold18841	3240	196	CM012323.1	70050245	210	scaffold1207	130332	212	ULFQ01000100.1	1583620	212
100585	FH	HGNC:3700	CVI CM012323.1			Colubroidea					ENSG00000091483	1	241497603	ENSGALG00000013165	2	85926101	ENSACAG00000009712	6	56606331	Scaffold23827	7256	429	CM012323.1	70162906	427	scaffold1207	42119	428	ULFQ01000100.1	1557789	431
100586	SDHA	HGNC:10680	CVI CM012323.1			Colubroidea					ENSG00000073578	5	218241	ENSGALG00000013167	2	85941188	ENSACAG00000009576	6	56572378	Scaffold23827	50647	578	CM012323.1	70228359	577	scaffold1884	17596	602	ULFQ01000100.1	1488608	602
100587	CCDC127	HGNC:30520	Published as ancestral sex-linked	Matsubara_et_al_2012:Fig_1	Z-Linked	Colubroidea					ENSG00000164366	5	196871	ENSGALG00000034628	2	85957248	ENSACAG00000009573	6	56556572	Scaffold23827	97835	189	CM012323.1	70300204	195	scaffold1884	86812	195	ULFQ01000100.1	1478803	193
100588	INO80C	HGNC:26994	NSC ULFQ01000100.1			Colubroidea					ENSG00000153391	18	35452230	ENSGALG00000013137	2	84195608	ENSACAG00000009981	2	112678398	Scaffold23827	125398	63	CM012307.1	35942163	41	scaffold880	78198	109	ULFQ01000100.1	1456026	92
100589	GALNT1	HGNC:4123	CVI CM012323.1			Colubroidea					ENSG00000141429	18	35581117	ENSGALG00000013135	2	84076731	ENSACAG00000006843	6	57567083	Scaffold772	275731	548	CM012323.1	70439243	534	scaffold222	310682	539	ULFQ01000100.1	1356859	538
100590	C18orf21	HGNC:28802	CVI CM012323.1			Colubroidea					ENSG00000141428	18	35972083	ENSGALG00000013131	2	83841416	ENSACAG00000006830	6	57668395	Scaffold772	249967	44	CM012323.1	70649055	39	scaffold222	245786	46	ULFQ01000100.1	1339840	49
100591	RPRD1A	HGNC:25560	CVI CM012323.1			Colubroidea					ENSG00000141425	18	35984387	ENSGALG00000013129	2	83790809	ENSACAG00000006774	6	57700492	Scaffold772	187194	264	CM012323.1	70683010	259	scaffold222	111514	258	ULFQ01000100.1	1273670	257
100592	FHOD3	HGNC:26178	CVI CM012323.1			Colubroidea					ENSG00000134775	18	36297714	ENSGALG00000013124	2	83340744	ENSACAG00000006717	6	57752584	Scaffold772	13426	999	CM012323.1	70840029	983	scaffold1144	11024	516	ULFQ01000100.1	977108	1017
100593	VSTM2A	HGNC:28499	CVI CM012323.1			Colubroidea					ENSG00000170419	7	54542325	ENSGALG00000041764	2	82527097	ENSACAG00000012608	GL343345.1	246043	Scaffold3635	318286	217	CM012323.1	71446239	181	scaffold1392	314024	188	ULFQ01000100.1	886543	190
100594	TECRL	HGNC:27365	CVI CM012323.1			Colubroidea					ENSG00000205678	4	64275257	ENSGALG00000038771	4	49400755	ENSACAG00000012618	GL343345.1	424878	Scaffold2448	198562	215	CM012323.1	71522124	243	scaffold1392	215656	248	ULFQ01000100.1	658866	230
100595	EPHA5	HGNC:3389	CVI CM012323.1			Colubroidea					ENSG00000145242	4	65319563	ENSGALG00000011680	4	51398618	ENSACAG00000012709	GL343345.1	579409	Scaffold2059	44356	644	CM012323.1	71677779	861	scaffold82	1322222	584	ULFQ01000100.1	364941	884
100596	CENPC	HGNC:1854	CVI CM012323.1			Colubroidea					ENSG00000145241	4	67468748	ENSGALG00000011683	4	51915873	ENSACAG00000013023	6	58196235	Scaffold1500	116551	130	CM012323.1	72167516	117	scaffold276	13941	107	ULFQ01000716.1	5477	110
100597	UBA6	HGNC:25581	CVI CM012323.1			Colubroidea					ENSG00000033178	4	67612652	ENSGALG00000011762	4	51960675	ENSACAG00000013037	6	58235061	Scaffold1500	157166	916	CM012323.1	72260484	888	scaffold276	124985	892	ULFQ01000298.1	536335	784
100598	TMPRSS11B	HGNC:25398	CVI CM012323.1			Colubroidea					ENSG00000185873	4	68226653	ENSGALG00000011792	4	52047237	ENSACAG00000013144	6	58297105	Scaffold1500	225446	191	CM012323.1	72402340	190	scaffold276	252253	176	ULFQ01000298.1	504029	175
100599	TMPRSS11A	HGNC:27954	CVI CM012323.1			Colubroidea					ENSG00000187054	4	67909385							Scaffold1500	225449	107	CM012323.1	72555263	77	scaffold276	252256	93	ULFQ01000298.1	426899	96
100600	TMPRSS11D	HGNC:24059	CVI CM012323.1			Colubroidea					ENSG00000153802	4	67820876							Scaffold108	121458	72	CM012323.1	72555263	108	scaffold276	379076	93	ULFQ01000298.1	426905	95
100601	TMPRSS11E	HGNC:24465	CVI CM012323.1			Colubroidea					ENSG00000087128	4	68447449	ENSGALG00000045891	4	52014155	ENSACAG00000027821	6	58396729	Scaffold1500	299857	244	CM012323.1	72555266	241	scaffold276	379079	257	ULFQ01000298.1	415174	231
100602	TMPRSS11F	HGNC:29994	CVI CM012323.1			Colubroidea					ENSG00000198092	4	68053198							Scaffold1500	299860	72	CM012323.1	72555266	103	scaffold276	379079	79	ULFQ01000298.1	426926	92
100603	SLC20A2	HGNC:10947	CVI CM012323.1			Colubroidea					ENSG00000168575	8	42416475	ENSGALG00000038336	4	34431805	ENSACAG00000009238	6	58752966	Scaffold1500	517232	604	CM012323.1	72714375	393	scaffold2801	84396	601	ULFQ01000298.1	147094	603
100604	CNTNAP1	HGNC:8011	Published as ancestral sex-linked	Yin_et_al_2016:Supp_Fig_30	ZW Pair	Colubroidea			yes		ENSG00000013306	17	44319625	ENSGALG00000042894	27	3167837	ENSACAG00000017306	6	66900372	Scaffold751	950331	298	CM012323.1	80818111	302	scaffold106	35725	312	ULFQ01000121.1	2814475	271
100605	EZH1	HGNC:3526	Published as ancestral sex-linked	Yin_et_al_2016:Supp_Fig_30	ZW Pair	Colubroidea	yes		yes		ENSG00000082641	17	48048329	ENSGALG00000011937	27	4179407	ENSACAG00000006615	6	74950138	Scaffold62	201880	656	CM012323.1	88674095	642	scaffold1010	305475	642	ULFQ01000030.1	6189682	655
100606	RAMP2	HGNC:9844	CVI CM012323.1			Colubroidea					ENSG00000131477	17	42758447	ENSGALG00000024449	27	5453198	ENSACAG00000014409	6	62018951	Scaffold4952	48736	32	CM012323.1	72922888	57	scaffold2738	72377	63	ULFQ01000122.1	117574	29
100607	MUC3B	HGNC:13384	CVI CM012323.1			Colubroidea											ENSACAG00000029184	6	62094334	Scaffold20374	1250	32	CM012323.1	72941569	21	scaffold2078	6612	42	ULFQ01000122.1	51092	32
100608	VPS25	HGNC:28122	CVI CM012323.1			Colubroidea					ENSG00000131475	17	42773436	ENSGALG00000034262	27	5455243	ENSACAG00000028401	6	62129905	Scaffold1982	900323	165	CM012323.1	73128383	163	scaffold592	31927	162	ULFQ01000368.1	38597	164
100609	WNK4	HGNC:14544	CVI CM012323.1			Colubroidea					ENSG00000126562	17	42780678	ENSGALG00000032191	27	5462100	ENSACAG00000013892	6	62189724	Scaffold1982	830553	857	CM012323.1	73200830	767	scaffold592	101761	747	ULFQ01000368.1	90428	776
100610	CNTD1	HGNC:26847	CVI CM012323.1			Colubroidea					ENSG00000176563	17	42798792	ENSGALG00000043285	27	5473787				Scaffold1982	814900	64	CM012323.1	73256723	102	scaffold592	153546	102	ULFQ01000368.1	151023	104
100611	BECN1	HGNC:1034	CVI CM012323.1			Colubroidea					ENSG00000126581	17	42810134	ENSGALG00000002973	27	5478574	ENSACAG00000013769	6	62274390	Scaffold1982	803479	431	CM012323.1	73261852	429	scaffold592	158705	427	ULFQ01000368.1	155127	428
100612	PSME3	HGNC:9570	Published as ancestral sex-linked	Vicoso_et_al_2013a:Dataset_S1(ENSACAG00000013688);Yin_et_al_2016:Supp_Fig_30(ENSACAG00000025593)	ZW Pair	Colubroidea	yes	yes			ENSG00000108671	17	32444261	ENSGALG00000024112	27	1658933	ENSACAG00000016508	6	65423417	Scaffold1464	679332	419	CM012323.1	79120646	408	scaffold1358	304173	418	ULFQ01000185.1	201188	417
100613	AOC2	HGNC:549	CVI CM012323.1			Colubroidea					ENSG00000131480	17	42844600	ENSGALG00000033522	27	5499722	ENSACAG00000013649	6	62395837	Scaffold1982	739148	408	CM012323.1	73476073	392	scaffold592	241450	420	ULFQ01000368.1	253497	417
100614	AOC3	HGNC:550	CVI CM012323.1			Colubroidea					ENSG00000131471	17	42851184	ENSGALG00000046412	27	5494647	ENSACAG00000013687	6	62355879	Scaffold1982	751403	539	CM012323.1	73476229	492	scaffold592	223587	519	ULFQ01000368.1	213742	506
100615	G6PC	HGNC:4056	CVI CM012323.1			Colubroidea					ENSG00000131482	17	42900797	ENSGALG00000030034	27	5507166	ENSACAG00000013598	6	62426353	Scaffold1982	715394	324	CM012323.1	73550675	293	scaffold592	293347	315	ULFQ01000368.1	292568	291
100616	AARSD1	HGNC:28417	CVI CM012323.1			Colubroidea					ENSG00000266967	17	42950526	ENSGALG00000002880	27	5511314	ENSACAG00000013559	6	62455217	Scaffold1982	668118	473	CM012323.1	73576948	448	scaffold592	319675	433	ULFQ01000368.1	226407	439
100617	PTGES3L	HGNC:43943	CVI CM012323.1			Colubroidea					ENSG00000267060	17	42968088	ENSGALG00000038129	27	5515779				Scaffold1982	668124	86	CM012323.1	73606099	87	scaffold592	339280	86	ULFQ01000368.1	357915	88
100618	RUNDC1	HGNC:25418	Published as ancestral sex-linked	Matsubara_et_al_2012:Fig_1; Yin_et_al_2016:Supp_Data_1	Z-Linked	Colubroidea					ENSG00000198863	17	42980565	ENSGALG00000002856	27	5517866	ENSACAG00000013545	6	62484213	Scaffold1982	656995	463	CM012323.1	73626634	450	scaffold592	370594	449	ULFQ01000368.1	366828	453
100619	RPL27	HGNC:10328	CVI CM012323.1			Colubroidea					ENSG00000131469	17	42998273	ENSGALG00000002837	27	5522072	ENSACAG00000013524	6	62501292	Scaffold1982	648354	135	CM012323.1	73646004	136	scaffold592	383724	136	ULFQ01000368.1	382252	136
100620	IFI35	HGNC:5399	CVI CM012323.1			Colubroidea					ENSG00000068079	17	43006725	ENSGALG00000002832	27	5526112	ENSACAG00000013511	6	62507887	Scaffold1982	634546	97	CM012323.1	73660072	110	scaffold592	396417	83	ULFQ01000368.1	391149	95
100621	VAT1	HGNC:16919	CVI CM012323.1			Colubroidea					ENSG00000108828	17	43014605	ENSGALG00000002818	27	5538068	ENSACAG00000013472	6	62567645	Scaffold1982	590005	332	CM012323.1	73691641	317	scaffold592	429813	318	ULFQ01000278.1	20027	332
100622	RND2	HGNC:18315	CVI CM012323.1			Colubroidea					ENSG00000108830	17	43025241	ENSGALG00000002804	27	5549486	ENSACAG00000013416	6	62653206	Scaffold1982	541627	223	CM012323.1	73748223	187	scaffold592	504822	221	ULFQ01000278.1	77978	213
100623	BRCA1	HGNC:1100	Published as ancestral sex-linked	Vicoso_et_al_2013a:Dataset_S1(ENSACAG00000013415)	ZW Pair	Colubroidea		yes			ENSG00000167614	19	54415219				ENSACAG00000016932	GL343329.1	1110754	Scaffold1519	73798	334	CM012323.1	102873507	330	scaffold505	128372	332	ULFQ01000092.1	865606	328
100624	NBR1	HGNC:6746	CVI CM012323.1			Colubroidea					ENSG00000188554	17	43170481	ENSGALG00000002765	27	5594511	ENSACAG00000013331	6	62853766	Scaffold1982	424652	572	CM012323.1	73889968	425	scaffold592	661935	450	ULFQ01000278.1	196260	367
100625	TMEM106A	HGNC:28288	CVI CM012323.1			Colubroidea					ENSG00000184988	17	43211835				ENSACAG00000013303	6	62886809	Scaffold1982	408992	181	CM012323.1	73917101	176	scaffold592	689616	177	ULFQ01000278.1	219823	184
100626	ARL4D	HGNC:656	CVI CM012323.1			Colubroidea					ENSG00000175906	17	43398959				ENSACAG00000013300	6	62927852	Scaffold1982	392860	179	CM012323.1	73934197	175	scaffold592	706191	177	ULFQ01000278.1	244037	177
100627	PCGF2	HGNC:12929	CVI CM012323.1			Colubroidea					ENSG00000277258	17	38733897	ENSGALG00000018815	27	4423054	ENSACAG00000013234	6	63003747	Scaffold1982	326181	299	CM012323.1	74009070	302	scaffold592	790854	310	ULFQ01000278.1	295932	306
100628	PSMB3	HGNC:9540	CVI CM012323.1			Colubroidea					ENSG00000277791	17	38752736	ENSGALG00000001597	27	4430363	ENSACAG00000013218	6	63091957	Scaffold1982	286167	197	CM012323.1	74104454	195	scaffold592	881998	195	ULFQ01000278.1	355886	194
100629	PIP4K2B	HGNC:8998	Published as ancestral sex-linked	Vicoso_et_al_2013a:Dataset_S1(ENSACAG00000013164)	ZW Pair	Colubroidea		yes			ENSG00000167615	19	54448887	ENSGALG00000035760	AADN04001595.1	21	ENSACAG00000016911	GL343329.1	1084428	Scaffold1519	98049	717	CM012323.1	102906103	717	scaffold505	95133	706	ULFQ01000092.1	834512	710
100630	CWC25	HGNC:25989	CVI CM012323.1			Colubroidea					ENSG00000273559	17	38800434	ENSGALG00000001624	27	4451019	ENSACAG00000013140	6	63147557	Scaffold1982	235231	268	CM012323.1	74194792	250	scaffold592	951134	268	ULFQ01000278.1	398040	258
100631	C17orf98	HGNC:34492	CVI CM012323.1			Colubroidea					ENSG00000275489	17	38835088							Scaffold1982	225706	37	CM012323.1	74218395	91	scaffold592	971758	37	ULFQ01000278.1	412238	57
100632	RPL23	HGNC:10316	CVI CM012323.1			Colubroidea					ENSG00000125691	17	38847865	ENSGALG00000001634	27	4463076	ENSACAG00000013113	6	63165305	Scaffold1982	219107	140	CM012323.1	74224116	140	scaffold592	975694	136	ULFQ01000278.1	415275	136
100633	TMEM98	HGNC:24529	CVI CM012323.1			Colubroidea					ENSG00000006042	17	32927910	ENSGALG00000031762	27	1731539	ENSACAG00000013101	6	63181045	Scaffold1982	200141	207	CM012323.1	74245104	200	scaffold592	994803	201	ULFQ01000278.1	431577	204
100634	ARHGAP27	HGNC:31813	CVI CM012323.1			Colubroidea					ENSG00000159314	17	45393902				ENSACAG00000013050	6	63201901	Scaffold1982	151824	545	CM012323.1	74262490	432	scaffold592	1033612	416	ULFQ01000278.1	452435	384
100635	PLEKHM1	HGNC:29017	NSC ULFQ01000278.1			Colubroidea					ENSG00000225190	17	45435900	ENSGALG00000000201	27	1757583	ENSACAG00000013013	6	63291336	Scaffold1982	125393	724	PDHV02001049.1	1232	212	scaffold834	64673	679	ULFQ01000278.1	539779	697
100636	CD79B	HGNC:1699	BCO Scaffold1982			Colubroidea					ENSG00000007312	17	63928740	ENSGALG00000000251	27	1793526				Scaffold1982	35907	19
100637	MRC2	HGNC:16875	CVI CM012323.1			Colubroidea					ENSG00000011028	17	62627401	ENSGALG00000000461	27	2576056	ENSACAG00000013359	6	61635240	Scaffold2879	1026701	1138	CM012323.1	74393059	1119	scaffold827	105728	1137	ULFQ01000122.1	466750	1081
100638	MARCHF10	HGNC:26655	CVI CM012323.1			Colubroidea					ENSG00000173838	17	62701314				ENSACAG00000013343	6	61587386	Scaffold2879	962028	416	CM012323.1	74464808	380	scaffold827	22626	366	ULFQ01000122.1	518821	362
100639	TANC2	HGNC:30212	Published as ancestral sex-linked	Rovatsos_et_al_2015:Table_S3	Z-Linked	Colubroidea					ENSG00000170921	17	63009556	ENSGALG00000000478	27	2792542	ENSACAG00000013237	6	61274590	Scaffold2879	576111	2000	CM012323.1	74657327	1904	scaffold32	24984	1931	ULFQ01000122.1	751453	1969
100640	ACE	HGNC:2707	CVI CM012323.1			Colubroidea					ENSG00000264813	17	63484823	ENSGALG00000000498	27	2830975	ENSACAG00000013067	6	61163031	Scaffold2879	466800	1016	CM012323.1	75018848	973	scaffold32	267105	987	ULFQ01000122.1	1093070	1023
100641	KCNH6	HGNC:18862	CVI CM012323.1			Colubroidea					ENSG00000173826	17	63523334	ENSGALG00000000505	27	2854851	ENSACAG00000012786	6	60982089	Scaffold2879	340961	740	CM012323.1	75078158	728	scaffold32	462614	729	ULFQ01000122.1	1154428	759
100642	DCAF7	HGNC:30915	Published as ancestral sex-linked	Vicoso_et_al_2013a:Dataset_S1(ENSACAG00000012744)	ZW Pair	Colubroidea			yes		ENSG00000004897	17	47117703	ENSGALG00000000596	27	3024097	ENSACAG00000017359	6	67234673	Scaffold751	1251362	804	CM012323.1	81168693	797	scaffold1591	310805	654	ULFQ01000121.1	2421094	799
100643	MAP3K3	HGNC:6855	CVI CM012323.1			Colubroidea					ENSG00000198909	17	63622415	ENSGALG00000000525	27	2906874	ENSACAG00000012612	6	60910466	Scaffold2879	254594	567	CM012323.1	75297690	578	scaffold709	64413	574	ULFQ01000122.1	1317126	563
100644	LIMD2	HGNC:28142	CVI CM012323.1			Colubroidea					ENSG00000136490	17	63695902	ENSGALG00000000529	27	2950471	ENSACAG00000012593	6	60891353	Scaffold2879	247232	97	CM012323.1	75343515	107	scaffold709	122116	103	ULFQ01000122.1	1356514	101
100645	RNF113A	HGNC:12974	CVI CM012323.1			Colubroidea					ENSG00000125352	X	119870475	ENSGALG00000000538	27	2961285	ENSACAG00000012485	6	60829355	Scaffold2879	210327	274	CM012323.1	75389517	272	scaffold534	44692	272	ULFQ01000122.1	1405497	269
100646	STRADA	HGNC:30172	CVI CM012323.1			Colubroidea					ENSG00000266173	17	63682336	ENSGALG00000000550	27	2968262	ENSACAG00000012388	6	60809611	Scaffold2879	187675	398	CM012323.1	75397118	390	scaffold534	52234	391	ULFQ01000122.1	1414436	386
100647	POLR1A	HGNC:17264	CVI CM012323.1			Colubroidea					ENSG00000068654	2	86020216	ENSGALG00000038160	4	86019611	ENSACAG00000012141	6	60729980	Scaffold2879	143033	1302	CM012323.1	75428479	1257	scaffold534	81537	1304	ULFQ01000122.1	1457803	1255
100648	PTCD3	HGNC:24717	CVI CM012323.1			Colubroidea					ENSG00000132300	2	86106182	ENSGALG00000015773	4	86049566	ENSACAG00000011938	6	60698113	Scaffold2879	109807	214	CM012323.1	75486341	188	scaffold534	140793	239	ULFQ01000122.1	1503799	164
100649	IMMT	HGNC:6047	Published as ancestral sex-linked	Rovatsos_et_al_2015:Table_S3	Z-Linked	Colubroidea					ENSG00000132305	2	86143932	ENSGALG00000015783	4	86065324	ENSACAG00000011776	6	60662495	Scaffold2879	65959	589	CM012323.1	75556919	535	scaffold534	178444	571	ULFQ01000122.1	1539909	386
100650	MRPL35	HGNC:14489	CVI CM012323.1			Colubroidea					ENSG00000132313	2	86199355	ENSGALG00000022950	4	86078408	ENSACAG00000025298	6	60655137	Scaffold2879	59142	91	CM012323.1	75618946	91	scaffold534	224810	90	ULFQ01000122.1	1584478	88
100651	REEP1	HGNC:25786	CVI CM012323.1			Colubroidea					ENSG00000068615	2	86213993	ENSGALG00000015786	4	86105021	ENSACAG00000011691	6	60571431	Scaffold2879	5661	180	CM012323.1	75630338	181	scaffold534	233811	185	ULFQ01000122.1	1600752	183
100652	CHMP3	HGNC:29865	CVI CM012323.1			Colubroidea					ENSG00000115561	2	86503431	ENSGALG00000015805	4	86188548	ENSACAG00000029575	6	60553158	Scaffold6300	399945	201	CM012323.1	75724124	199	scaffold534	323263	199	ULFQ01000122.1	1646100	199
100653	RNF103	HGNC:12859	CVI CM012323.1			Colubroidea					ENSG00000239305	2	86603393	ENSGALG00000015809	4	86194145	ENSACAG00000011597	6	60521535	Scaffold6300	369867	621	CM012323.1	75740970	617	scaffold534	348649	616	ULFQ01000122.1	1661423	625
100654	RMND5A	HGNC:25850	CVI CM012323.1			Colubroidea					ENSG00000153561	2	86720173	ENSGALG00000015815	4	86216752	ENSACAG00000011511	6	60492181	Scaffold6300	343376	384	CM012323.1	75763072	384	scaffold534	377421	384	ULFQ01000122.1	1686930	381
100655	CD8A	HGNC:1706	NSC ULFQ01000122.1			Colubroidea					ENSG00000153563	2	86784610	ENSGALG00000015900	4	86325634	ENSACAG00000011502	6	60462056	Scaffold6300	307441	31							ULFQ01000122.1	1724104	29
100656	ZMAT1	HGNC:29377	CVI CM012323.1			Colubroidea					ENSG00000166432	X	101882288	ENSGALG00000046009	4	86493517	ENSACAG00000021013	6	60427484	Scaffold6300	266035	272	CM012323.1	75837730	236	scaffold1003	36809	231	ULFQ01000122.1	1763525	214
100657	KRCC1	HGNC:28039	CVI CM012323.1			Colubroidea					ENSG00000172086	2	88027205							Scaffold6300	290733	40	CM012323.1	75838384	26	scaffold1003	44270	26	ULFQ01000122.1	1764167	26
100658	AREG	HGNC:651	CVI CM012323.1			Colubroidea					ENSG00000109321	4	74445134	ENSGALG00000010866	4	45060436	ENSACAG00000029391	6	60320563	Scaffold6300	168111	38	CM012323.1	75966461	36	scaffold199	1228822	36	ULFQ01000122.1	1911448	29
100659	EREG	HGNC:3443	CVI CM012323.1			Colubroidea					ENSG00000124882	4	74365143	ENSGALG00000010864	4	45042456	ENSACAG00000011452	6	60271171	Scaffold6300	127156	72	CM012323.1	76020508	47	scaffold199	1175041	28
100660	EPGN	HGNC:17470	BCO Scaffold6300			Colubroidea					ENSG00000182585	4	74308473	ENSGALG00000010859	4	45019071	ENSACAG00000011440	6	60195209	Scaffold6300	74744	29
100661	MTHFD2L	HGNC:31865	CVI CM012323.1			Colubroidea					ENSG00000163738	4	74114174	ENSGALG00000010855	4	44991195	ENSACAG00000011391	6	60166039	Scaffold6300	47577	267	CM012323.1	76109295	268	scaffold199	1044791	267	ULFQ01000122.1	2020357	265
100662	CXCL8	HGNC:6025	CVI CM012323.1			Colubroidea					ENSG00000169429	4	73740506	ENSGALG00000011668	4	51270481	ENSACAG00000011382	AAWZ02035874	23277	Scaffold23368	29202	52	CM012323.1	76278665	32	scaffold199	941518	37	ULFQ01000122.1	2186477	38
100663	ANKRD17	HGNC:23575	CVI CM012323.1			Colubroidea					ENSG00000132466	4	73073376	ENSGALG00000011642	4	51063217	ENSACAG00000011145	6	59878336	Scaffold14594	39607	2246	CM012323.1	76346736	2124	scaffold199	727602	2120	ULFQ01000122.1	1537929	2178
100664	COX18	HGNC:26801	CVI CM012323.1			Colubroidea					ENSG00000163626	4	73052362	ENSGALG00000011626	4	51055715	ENSACAG00000011114	6	59862024	Scaffold14594	164266	126	CM012323.1	76522141	110	scaffold199	679675	133	ULFQ01000122.1	2413962	132
100665	RPIA	HGNC:10297	CVI CM012323.1			Colubroidea					ENSG00000153574	2	88691644	ENSGALG00000015960	4	86722233	ENSACAG00000002303	6	59717772	Scaffold14594	195217	204	CM012323.1	76541121	192	scaffold199	654106	192	ULFQ01000122.1	2425857	193
100666	EIF2AK3	HGNC:3255	CVI CM012323.1			Colubroidea					ENSG00000172071	2	88556741	ENSGALG00000015958	4	86677824	ENSACAG00000002119	6	59670350	Scaffold14594	216141	814	CM012323.1	76562592	786	scaffold199	595780	801	ULFQ01000122.1	2447914	794
100667	FOXI3	HGNC:35123	CVI CM012323.1			Colubroidea					ENSG00000214336	2	88446787	ENSGALG00000037457	4	86624887	ENSACAG00000008418	6	59527327	Scaffold14594	297485	241	CM012323.1	76635438	260	scaffold199	531261	253	ULFQ01000122.1	2519696	250
100668	THNSL2	HGNC:25602	CVI CM012323.1			Colubroidea					ENSG00000144115	2	88170295	ENSGALG00000015939	4	86543439	ENSACAG00000008423	6	59380111	Scaffold14594	406141	369	CM012323.1	76811346	64	scaffold199	383223	62	ULFQ01000122.1	2644893	24
100669	FABP1	HGNC:3555	BCO Scaffold14594			Colubroidea					ENSG00000163586	2	88122982	ENSGALG00000015937	4	86531504	ENSACAG00000008459	6	59363519	Scaffold14594	434122	102
100670	SMYD1	HGNC:20986	CVI CM012323.1			Colubroidea					ENSG00000115593	2	88067780	ENSGALG00000015935	4	86507298	ENSACAG00000008484	6	59317036	Scaffold14594	443294	422	CM012323.1	76824462	402	scaffold199	352876	421	ULFQ01000122.1	2674132	422
100671	BTC	HGNC:1121	CVI CM012323.1			Colubroidea					ENSG00000174808	4	74744759	ENSGALG00000028608	4	34879240				Scaffold1500	579540	36	CM012323.1	76880153	30	scaffold199	326005	30	ULFQ01000122.1	2727898	28
100672	PARM1	HGNC:24536	CVI CM012323.1			Colubroidea					ENSG00000169116	4	74933095	ENSGALG00000010268	4	34869460	ENSACAG00000029131	6	59212600	Scaffold1500	935858	98	CM012323.1	76961650	70	scaffold199	244852	59	ULFQ01000122.1	2803873	52
100673	CDKL2	HGNC:1782	CVI CM012323.1			Colubroidea					ENSG00000138769	4	75578005	ENSGALG00000010119	4	34292374	ENSACAG00000008598	6	59145652	Scaffold1500	871551	429	CM012323.1	77039839	384	scaffold199	148839	402	ULFQ01000122.1	2851628	393
100674	G3BP2	HGNC:30291	CVI CM012323.1			Colubroidea					ENSG00000138757	4	75642782	ENSGALG00000010882	4	45128541	ENSACAG00000008695	6	59101180	Scaffold1500	823366	463	CM012323.1	77090569	453	scaffold199	84897	451	ULFQ01000122.1	2892069	443
100675	USO1	HGNC:30904	CVI CM012323.1			Colubroidea					ENSG00000138768	4	75724593	ENSGALG00000010878	4	45101871	ENSACAG00000008914	6	59045791	Scaffold1500	762488	808	CM012323.1	77143492	790	scaffold199	5414	796	ULFQ01000122.1	2944053	793
100676	SH2D4A	HGNC:26102	CVI CM012323.1			Colubroidea					ENSG00000104611	8	19313617	ENSGALG00000010122	4	34329676	ENSACAG00000009003	6	58977618	Scaffold1500	718034	269	CM012323.1	77236628	225	scaffold140	1554840	252	ULFQ01000122.1	3044080	255
100677	CSGALNACT1	HGNC:24290	CVI CM012323.1			Colubroidea					ENSG00000147408	8	19404161	ENSGALG00000010125	4	34344526	ENSACAG00000009025	6	58947871	Scaffold1500	698828	451	CM012323.1	77264136	420	scaffold140	1532823	425	ULFQ01000122.1	3083369	415
100678	INTS10	HGNC:25548	CVI CM012323.1			Colubroidea					ENSG00000104613	8	19817140	ENSGALG00000010130	4	34390208	ENSACAG00000009079	6	58912473	Scaffold1500	648873	676	CM012323.1	77293005	635	scaffold140	1470624	638	ULFQ01000122.1	3127765	583
100679	HGSNAT	HGNC:26527	CVI CM012323.1			Colubroidea					ENSG00000165102	8	43140455	ENSGALG00000010136	4	34410475	ENSACAG00000009173	6	58874172	Scaffold1500	611349	396	CM012323.1	77336546	362	scaffold140	1429944	372	ULFQ01017963.1	89	112
100680	POMK	HGNC:26267	CVI CM012323.1			Colubroidea					ENSG00000185900	8	43093506	ENSGALG00000026210	4	34420155	ENSACAG00000009218	6	58867960	Scaffold1500	602006	279	CM012323.1	77381370	272	scaffold140	1418795	272	ULFQ01002496.1	9825	271
100681	GH1	HGNC:4261	Published as ancestral sex-linked	Matsubara_et_al_2006:Fig_5; Matsubara_et_al_2012:Fig_1	Z-Linked	Colubroidea					ENSG00000259384	17	63917200	ENSGALG00000000249	27	1787645	ENSACAG00000012951	6	63428935	Scaffold1982	47346	162	CM012323.1	77396820	156	scaffold140	1398898	118	ULFQ01004090.1	166	102
100682	SCN4A	HGNC:10591	CVI CM012323.1			Colubroidea					ENSG00000007314	17	63938554	ENSGALG00000034427	27	1801386	ENSACAG00000012739	6	63462911	Scaffold3806	34922	1161	CM012323.1	77461922	1518	scaffold140	1248946	1525	ULFQ01000432.1	15713	1521
100683	ADAM11	HGNC:189	CVI CM012323.1			Colubroidea					ENSG00000073670	17	44759031	ENSGALG00000035673	27	1411872	ENSACAG00000012582	6	63586467	Scaffold318	545760	657	CM012323.1	77614558	639	scaffold140	741061	634	ULFQ01000432.1	177363	644
100684	DBF4B	HGNC:17883	BCO Scaffold318			Colubroidea					ENSG00000161692	17	44708608	ENSGALG00000035814	27	1399403	ENSACAG00000012578	6	63691136	Scaffold318	520194	64
100685	MEIOC	HGNC:26670	CVI CM012323.1			Colubroidea					ENSG00000180336	17	44656404	ENSGALG00000045889	27	1375764	ENSACAG00000012539	6	63732260	Scaffold318	482678	730	CM012323.1	77712424	695	scaffold140	1073277	712	ULFQ01000201.1	13181	687
100686	CCDC43	HGNC:26472	NSC ULFQ01000201.1			Colubroidea					ENSG00000180329	17	44673069	ENSGALG00000001022	27	1391412	ENSACAG00000012551	6	63721374	Scaffold318	508576	172	CM012312.1	60002494	167	scaffold140	1101243	168	ULFQ01000201.1	4412	167
100687	FZD2	HGNC:4040	CVI CM012323.1			Colubroidea					ENSG00000180340	17	44557459	ENSGALG00000030847	27	1672021	ENSACAG00000012536	6	63838547	Scaffold318	412621	537	CM012323.1	77868321	530	scaffold140	985339	530	ULFQ01000201.1	133673	541
100688	GPATCH8	HGNC:29066	CVI CM012323.1			Colubroidea					ENSG00000186566	17	44395284	ENSGALG00000041556	27	1679275	ENSACAG00000012522	6	63899937	Scaffold318	282115	1216	CM012323.1	77907933	1081	scaffold140	845573	1151	ULFQ01000201.1	203818	1145
100689	ITGA2B	HGNC:6138	CVI CM012323.1			Colubroidea					ENSG00000005961	17	44372180	ENSGALG00000040964	AADN04005821.1	7423	ENSACAG00000012258	6	64000512	Scaffold318	232284	513	CM012323.1	78034706	562	scaffold140	774726	481	ULFQ01000201.1	318547	408
100690	FAM171A2	HGNC:30480	Published as ancestral sex-linked	Vicoso_et_al_2013a:Dataset_S1,Table_S4,Table_S5(ENSACAG00000012203)	ZW Pair	Colubroidea		yes			ENSG00000105538	19	48720587				ENSACAG00000015896	GL343279.1	1150330	Scaffold6508	745960	849	CM012323.1	104616556	828	scaffold576	1310309	824	ULFQ01000175.1	972196	821
100691	GRN	HGNC:4601	CVI CM012323.1			Colubroidea					ENSG00000030582	17	44345086	ENSGALG00000033530	27	1723351	ENSACAG00000012130	6	64130924	Scaffold318	156245	322	CM012323.1	78177435	269	scaffold140	684893	293	ULFQ01000201.1	449323	250
100692	GJC1	HGNC:4280	CVI CM012323.1			Colubroidea					ENSG00000182963	17	44798448	ENSGALG00000000997	27	1428042	ENSACAG00000012123	6	64182781	Scaffold318	140413	360	CM012323.1	78200871	359	scaffold140	676980	359	ULFQ01000201.1	466626	358
100693	EFTUD2	HGNC:30858	Published as ancestral sex-linked	Gamble_et_al_2017:Table_S3	Z-Linked	Colubroidea					ENSG00000108883	17	44849943	ENSGALG00000000988	27	1442516	ENSACAG00000007637	6	64260190	Scaffold318	59304	959	CM012323.1	78268632	959	scaffold140	587250	960	ULFQ01000201.1	547782	961
100694	CCDC103	HGNC:32700	CVI CM012323.1			Colubroidea					ENSG00000167131	17	44899142	ENSGALG00000000918	27	1458650	ENSACAG00000007629	6	64332498	Scaffold318	54375	147	CM012323.1	78306036	143	scaffold140	581037	147	ULFQ01000201.1	585384	148
100695	FAM187A	HGNC:35153	CVI CM012323.1			Colubroidea					ENSG00000214447	17	44899712	ENSGALG00000000918	27	1458650	ENSACAG00000007629	6	64332498	Scaffold318	50010	177	CM012323.1	78311419	165	scaffold140	576918	195	ULFQ01000201.1	589798	199
100696	GFAP	HGNC:4235	CVI CM012323.1			Colubroidea					ENSG00000131095	17	44903161	ENSGALG00000000909	27	1466576	ENSACAG00000007521	6	64367156	Scaffold318	21201	403	CM012323.1	78323556	399	scaffold140	548303	401	ULFQ01000201.1	595882	402
100697	KIF18B	HGNC:27102	CVI CM012323.1			Colubroidea					ENSG00000186185	17	44924709	ENSGALG00000031553	27	1471055	ENSACAG00000007486	6	64477615	Scaffold1464	10404	356	CM012323.1	78388548	258	scaffold140	492664	322	ULFQ01000201.1	649640	352
100698	C1QL1	HGNC:24182	CVI CM012323.1			Colubroidea					ENSG00000131094	17	44959693	ENSGALG00000028031	27	1479940				Scaffold1464	60091	217	CM012323.1	78446006	218	scaffold140	426983	217	ULFQ01000201.1	698128	218
100699	NMT1	HGNC:7857	Published as ancestral sex-linked	Vicoso_et_al_2013a:Dataset_S1,Table_S4,Table_S5(ENSACAG00000007348); Yin_et_al_2016:Supp_Fig_32	ZW Pair	Colubroidea	yes	yes			ENSG00000120071	17	46029916	ENSGALG00000000603	27	3055086	ENSACAG00000017346	6	67045952	Scaffold751	1097313	876	CM012323.1	80962994	810	scaffold1591	106066	867	ULFQ01000121.1	2514373	842
100700	DCAKD	HGNC:26238	CVI CM012323.1			Colubroidea					ENSG00000172992	17	45023340	ENSGALG00000000870	27	1489883	ENSACAG00000007476	6	64753584	Scaffold1464	177427	192	CM012323.1	78595416	186	scaffold140	338357	187	ULFQ01000201.1	852762	184
100701	PLCD3	HGNC:9061	CVI CM012323.1			Colubroidea					ENSG00000161714	17	45108967	ENSGALG00000045212	27	1507914	ENSACAG00000007219	6	64798969	Scaffold1464	222364	637	CM012323.1	78646875	613	scaffold140	224859	618	ULFQ01000201.1	898265	613
100702	ACBD4	HGNC:23337	CVI CM012323.1			Colubroidea					ENSG00000181513	17	45132600				ENSACAG00000000928	6	64898861	Scaffold1464	292905	169	CM012323.1	78709159	181	scaffold140	201107	164	ULFQ01000201.1	981569	187
100703	HEXIM1	HGNC:24953	Published as ancestral sex-linked	Vicoso_et_al_2013a:Table_S4,Table_S5(ENSACAG00000016321)	ZW Pair	Colubroidea		yes			ENSG00000174939	16	29900375				ENSACAG00000014305	GL343279.1	45811	Scaffold1856	517444	290	CM012323.1	105866120	290	scaffold639	210403	290	ULFQ01000174.1	1014128	288
100704	HEXIM2	HGNC:28591	CVI CM012323.1			Colubroidea					ENSG00000168517	17	45160700							Scaffold1464	322020	96	CM012323.1	78768136	95	scaffold140	176737	94	ULFQ01000201.1	1026704	95
100705	CDK5R1	HGNC:1775	CVI CM012323.1			Colubroidea					ENSG00000176749	17	32486619	ENSGALG00000041907	27	1657762				Scaffold1464	357910	265	CM012323.1	78834975	267	scaffold140	114893	267	ULFQ01000201.1	1071827	267
100706	MYO1D	HGNC:7598	Published as ancestral sex-linked	Matsubara_et_al_2012:Fig_1	Z-Linked	Colubroidea					ENSG00000176658	17	32492522	ENSGALG00000000674	27	1585859	ENSACAG00000016324	6	65036178	Scaffold1464	366470	919	CM012309.1	16091702	861	scaffold140	4316	871	ULFQ01000201.1	1079154	889
100707	MAP3K14	HGNC:6853	CVI CM012323.1			Colubroidea					ENSG00000006062	17	45263119	ENSGALG00000000685	27	1563067	ENSACAG00000016433	6	65264524	Scaffold1464	555889	678	CM012323.1	78973963	633	scaffold1358	148813	644	ULFQ01000185.1	70035	603
100708	FMNL1	HGNC:1212	CVI CM012323.1			Colubroidea					ENSG00000184922	17	45221444	ENSGALG00000032155	27	1543195	ENSACAG00000016489	6	65313918	Scaffold1464	590443	831	CM012323.1	79014732	838	scaffold1358	191541	805	ULFQ01000185.1	108385	834
100709	PSMD11	HGNC:9556	Published as ancestral sex-linked	Vicoso_et_al_2013a:Dataset_S1(ENSACAG00000016508); Yin_et_al_2016:Supp_Fig_32	ZW Pair	Colubroidea	yes	yes	yes		ENSG00000126464	19	49591643				ENSACAG00000027532	6	80526222	Scaffold4163	944546	1588	CM012323.1	92898626	1561	scaffold1152	204572	1582	ULFQ01000030.1	1746611	1570
100710	NSF	HGNC:8016	Published as ancestral sex-linked	Vicoso_et_al_2013a:Dataset_S1,Table_S4,Table_S5(ENSACAG00000016584)	ZW Pair	Colubroidea		yes									ENSACAG00000012103	GL344656.1	19373	Scaffold1856	1353287	43	CM012323.1	106857280	78	scaffold639	1319863	43	ULFQ01000198.1	135789	22
100711	WNT3	HGNC:12782	CVI CM012323.1			Colubroidea					ENSG00000108379	17	46762506	ENSGALG00000001079	27	1291171	ENSACAG00000016642	6	65550323	Scaffold1464	772525	352	CM012323.1	79228326	350	scaffold1358	405825	350	ULFQ01000185.1	319526	352
100712	WNT9B	HGNC:12779	CVI CM012323.1			Colubroidea					ENSG00000158955	17	46833201	ENSGALG00000001097	27	1266852	ENSACAG00000016690	6	65623096	Scaffold1464	805576	322	CM012323.1	79287810	324	scaffold526	1121444	319	ULFQ01000185.1	383611	314
100713	GOSR2	HGNC:4431	CVI CM012323.1			Colubroidea					ENSG00000108433	17	46923075	ENSGALG00000001107	27	1231001	ENSACAG00000016728	6	65691729	Scaffold1464	894906	135	CM012323.1	79375025	195	scaffold526	1202990	187	ULFQ01000185.1	448079	186
100714	LARP6L	NCBI:420093	CVI CM012323.1			Colubroidea								ENSGALG00000044970	28	1570440	ENSACAG00000016739	6	65733068	Scaffold1464	929723	319	CM012323.1	79405759	160	scaffold526	1225614	157	ULFQ01000185.1	486691	31
100715	RPRML	HGNC:32422	CVI CM012323.1			Colubroidea					ENSG00000179673	17	46978156				ENSACAG00000016741	6	65769675	Scaffold1464	980502	104	CM012323.1	79447422	105	scaffold526	1289220	105	ULFQ01000185.1	532188	102
100716	ITGB3	HGNC:6156	CVI CM012323.1			Colubroidea					ENSG00000259207	17	47253846	ENSGALG00000000379	27	2474195	ENSACAG00000016742	6	65791773	Scaffold1464	941109	588	CM012323.1	79471033	579	scaffold526	1313834	573	ULFQ01000185.1	561190	596
100717	EFCAB13	HGNC:26864	CVI CM012323.1			Colubroidea					ENSG00000178852	17	47323290				ENSACAG00000023986	6	65889012				CM012323.1	79588199	76	scaffold526	1446270	45	ULFQ01000185.1	683091	66
100718	EFCAB3	HGNC:26379	CVI CM012323.1			Colubroidea					ENSG00000172421	17	62343941	ENSGALG00000044302	27	2497092	ENSACAG00000016814	6	65974462	Scaffold751	144953	196	CM012323.1	79661330	180	scaffold526	1518698	142	ULFQ01000185.1	789353	129
100719	METTL2A	HGNC:25755	CVI CM012323.1			Colubroidea					ENSG00000087995	17	62423867	ENSGALG00000000396	27	2503689	ENSACAG00000016823	6	66014724	Scaffold751	172307	268	CM012323.1	79692418	258	scaffold526	1540989	233	ULFQ01000185.1	810131	258
100720	TLK2	HGNC:11842	Published as ancestral sex-linked	Vicoso_et_al_2013a:Dataset_S1,Table_S4,Table_S5(ENSACAG00000016868)	ZW Pair	Colubroidea		yes	yes		ENSG00000198740	17	49289206	ENSGALG00000001279	27	3606501	ENSACAG00000006063	6	76257405	Scaffold932	975807	609	CM012323.1	90038432	594	scaffold828	1158004	595	ULFQ01000030.1	4811418	600
100721	METTL16	HGNC:28484	CVI CM012323.1			Colubroidea					ENSG00000127804	17	2405562	ENSGALG00000014901	1	79411367	ENSACAG00000016895	6	66088934	Scaffold751	255957	434	CM012323.1	79822917	435	scaffold526	1630785	433	ULFQ01000185.1	901477	418
100722	ZNF385C	HGNC:33722	CVI CM012323.1			Colubroidea					ENSG00000187595	17	42025576	ENSGALG00000003403	27	5186133	ENSACAG00000016919	6	66164193	Scaffold751	368746	377	CM012323.1	79999921	391	scaffold1634	41609	405	ULFQ01000185.1	1067513	377
100723	NKIRAS2	HGNC:17898	CVI CM012323.1			Colubroidea					ENSG00000168256	17	42011382	ENSGALG00000028971	27	5181433	ENSACAG00000016936	6	66354573	Scaffold751	487334	178	CM012323.1	80164480	175	scaffold1634	168293	177	ULFQ01000185.1	1230824	176
100724	DNAJC7	HGNC:12392	CVI CM012323.1			Colubroidea					ENSG00000168259	17	41976433	ENSGALG00000042796	27	5161979	ENSACAG00000016938	6	66365565	Scaffold751	494102	458	CM012323.1	80171747	453	scaffold1634	175229	452	ULFQ01000185.1	1239056	449
100725	CNP	HGNC:2158	CVI CM012323.1			Colubroidea					ENSG00000173786	17	41966741	ENSGALG00000003457	27	5156868	ENSACAG00000016984	6	66410377	Scaffold751	540922	365	CM012323.1	80213733	358	scaffold106	552971	360	ULFQ01000185.1	1293206	361
100726	ODAD4	HGNC:25280	CVI CM012323.1			Colubroidea					ENSG00000204815	17	41930635	ENSGALG00000003464	27	5149292	ENSACAG00000016998	6	66446037	Scaffold751	561723	414	CM012323.1	80235870	405	scaffold106	518659	426	ULFQ01000185.1	1316796	404
100727	ACLY	HGNC:115	CVI CM012323.1			Colubroidea					ENSG00000131473	17	41866908	ENSGALG00000003475	27	5123850	ENSACAG00000017013	6	66483805	Scaffold751	616296	1051	CM012323.1	80299127	1056	scaffold106	438281	1047	ULFQ01000185.1	1383305	1049
100728	KLHL11	HGNC:19008	CVI CM012323.1			Colubroidea					ENSG00000178502	17	41853545	ENSGALG00000003536	27	5118445	ENSACAG00000017093	6	66556686	Scaffold751	663555	604	CM012323.1	80364529	116	scaffold106	365685	607	ULFQ01000011.1	3340365	245
100729	NT5C3B	HGNC:28300	CVI CM012323.1			Colubroidea					ENSG00000141698	17	41825181	ENSGALG00000003651	27	5108613	ENSACAG00000017097	6	66572145	Scaffold751	681183	237	CM012323.1	80379452	234	scaffold106	343995	235	ULFQ01000121.1	2759697	214
100730	FKBP10	HGNC:18169	CVI CM012323.1			Colubroidea					ENSG00000141756	17	41812680	ENSGALG00000025764	27	5102761	ENSACAG00000017140	6	66594823	Scaffold751	691100	495	CM012323.1	80389287	486	scaffold106	327938	491	ULFQ01000121.1	3134027	497
100731	ATXN7L3	HGNC:25416	CVI CM012323.1			Colubroidea					ENSG00000087152	17	44191805	ENSGALG00000030899	AADN04001028.1	16290	ENSACAG00000017179	6	66680243	Scaffold751	749513	303	CM012323.1	80419590	295	scaffold106	251373	304	ULFQ01000121.1	3056258	301
100732	TMUB2	HGNC:28459	CVI CM012323.1			Colubroidea					ENSG00000168591	17	44186970				ENSACAG00000017177	6	66660004	Scaffold751	741712	248	CM012323.1	80441059	237	scaffold106	279490	241	ULFQ01000121.1	3081763	239
100733	ASB16	HGNC:19768	CVI CM012323.1			Colubroidea					ENSG00000161664	17	44170447	ENSGALG00000036446	AADN04001028.1	17570	ENSACAG00000017168	6	66648923	Scaffold751	727285	379	CM012323.1	80449189	359	scaffold106	287799	358	ULFQ01000121.1	3092762	361
100734	HROB	HGNC:28460	CVI CM012323.1			Colubroidea					ENSG00000125319	17	44141906	ENSGALG00000044452	AADN04001028.1	24454	ENSACAG00000017163	6	66630553	Scaffold751	713607	226	CM012323.1	80477236	222	scaffold106	304968	247	ULFQ01000121.1	3118764	193
100735	UBTF	HGNC:12511	Published as ancestral sex-linked	Vicoso_et_al_2013a:Dataset_S1(ENSACAG00000017186)	ZW Pair	Colubroidea		yes			ENSG00000090554	19	49474207				ENSACAG00000017350	GL343355.1	247326	Scaffold1856	1766702	20	CM012310.1	5729935	23
100736	SLC4A1	HGNC:11027	CVI CM012323.1			Colubroidea					ENSG00000004939	17	44248385	ENSGALG00000039978	AADN04005854.1	5590	ENSACAG00000017228	6	66792162	Scaffold751	855901	667	CM012323.1	80725570	640	scaffold106	113758	666	ULFQ01000121.1	2902986	640
100737	RUNDC3A	HGNC:16984	Published as ancestral sex-linked	Vicoso_et_al_2013a:Dataset_S1(ENSACAG00000013955); Yin_et_al_2016:Supp_Fig_32	ZW Pair	Colubroidea	yes	yes			ENSG00000108344	17	39980797	ENSGALG00000033162	27	4729921	ENSACAG00000003160	6	68929981	Scaffold751	2526872	503	CM012323.1	82557591	450	scaffold328	1348003	504	ULFQ01000121.1	971585	503
100738	SLC25A39	HGNC:24279	Published as ancestral sex-linked	Vicoso_et_al_2013a:Dataset_S1(ENSACAG00000017306)	ZW Pair	Colubroidea		yes			ENSG00000114742	3	39051998	ENSGALG00000006052	2	5312695	ENSACAG00000009416	6	326270	Scaffold1468	1056384	682	CM012323.1	3450555	671	scaffold619	1999477	673	ULFQ01000110.1	1168509	673
100739	MAPT	HGNC:6893	Published as ancestral sex-linked	Vicoso_et_al_2013a:Dataset_S1(ENSACAG00000017319)	ZW Pair	Colubroidea			yes		ENSG00000131759	17	40309192	ENSGALG00000037935	27	4830348	ENSACAG00000002413	6	69727311	Scaffold751	3192197	445	CM012323.1	83274613	442	scaffold328	457536	441	ULFQ01000121.1	20688	426
100740	KANSL1	HGNC:24565	Published as ancestral sex-linked	Vicoso_et_al_2013a:Dataset_S1(ENSACAG00000017346); Yin_et_al_2016:Supp_Fig_32	ZW Pair	Colubroidea	yes	yes	yes		ENSG00000130726	19	58544091	ENSGALG00000036578	AADN04001603.1	14809	ENSACAG00000010694	GL343253.1	90437	Scaffold14669	60913	578	CM012323.1	95036005	597	scaffold1724	86843	565	ULFQ01000276.1	282376	562
100741	CDC27	HGNC:1728	Published as ancestral sex-linked	Vicoso_et_al_2013a:Dataset_S1(ENSACAG00000017359)	ZW Pair	Colubroidea		yes			ENSG00000184863	7	155644451	ENSGALG00000006372	2	8000159	ENSACAG00000011035	6	5834727	Scaffold94	1041439	931	CM012323.1	6652753	749	scaffold153	331942	777	ULFQ01000321.1	171175	803
100742	MYL4	HGNC:7585	CVI CM012323.1			Colubroidea					ENSG00000198336	17	47200446	ENSGALG00000000585	27	3015291	ENSACAG00000017407	6	67285088	Scaffold751	1355751	163	CM012323.1	81228395	164	scaffold328	2627742	151	ULFQ01000121.1	2383795	149
100743	CACNB1	HGNC:1401	CVI CM012323.1			Colubroidea					ENSG00000067191	17	39173456	ENSGALG00000025788	27	4527283	ENSACAG00000017422	6	67321178	Scaffold751	1389283	520	CM012323.1	81274316	501	scaffold328	2563896	514	ULFQ01000121.1	2324793	522
100744	RPL19	HGNC:10312	CVI CM012323.1			Colubroidea					ENSG00000108298	17	39200283	ENSGALG00000001658	27	4534537	ENSACAG00000017455	6	67405902	Scaffold751	1454223	195	CM012323.1	81341974	195	scaffold328	2509488	195	ULFQ01000121.1	2286414	195
100745	STAC2	HGNC:23990	CVI CM012323.1			Colubroidea					ENSG00000141750	17	39210536				ENSACAG00000017469	6	67440308	Scaffold751	1479423	308	CM012323.1	81381883	308	scaffold328	2437919	306	ULFQ01000121.1	2211248	310
100746	FBXL20	HGNC:24679	Published as ancestral sex-linked	Vicoso_et_al_2013a:Dataset_S1(ENSACAG00000017505); Yin_et_al_2016:Supp_Fig_32	ZW Pair	Colubroidea	yes	yes			ENSG00000188895	17	40122298	ENSGALG00000030739	27	4790087	ENSACAG00000002768	6	69400603	Scaffold751	2886628	393	CM012323.1	82982773	380	scaffold328	917570	375	ULFQ01000121.1	478675	393
100747	MED1	HGNC:9234	CVI CM012323.1			Colubroidea					ENSG00000125686	17	39404285	ENSGALG00000001708	27	4561652	ENSACAG00000017520	6	67729379	Scaffold751	1673937	1408	CM012323.1	81579628	1392	scaffold328	2264212	1400	ULFQ01000121.1	2013305	1433
100748	CDK12	HGNC:24224	Published as ancestral sex-linked	Vicoso_et_al_2013a:Dataset_S1,Table_S4,Table_S5(ENSACAG00000017541,ENSACAG00000023742); Yin_et_al_2016:Supp_Fig_32(ENSACAG00000023742)	ZW Pair	Colubroidea	yes	yes			ENSG00000083896	4	68310387	ENSGALG00000035906	4	52093350	ENSACAG00000009697	6	58521263	Scaffold1500	386896	641	CM012323.1	84991306	622	scaffold276	504544	624	ULFQ01000298.1	300919	624
100749	NEUROD2	HGNC:7763	CVI CM012323.1			Colubroidea					ENSG00000171532	17	39603536	ENSGALG00000039633	27	4610697	ENSACAG00000017561	6	67945294	Scaffold751	1849099	256	CM012323.1	81749890	262	scaffold328	2118696	275	ULFQ01000121.1	1837795	274
100750	PPP1R1B	HGNC:9287	CVI CM012323.1			Colubroidea					ENSG00000131771	17	39626740	ENSGALG00000044406	27	4622928				Scaffold751	1938200	73	CM012323.1	81880197	78	scaffold328	1932163	53	ULFQ01000121.1	1659935	51
100751	STARD3	HGNC:17579	CVI CM012323.1			Colubroidea					ENSG00000131748	17	39637065	ENSGALG00000014607	27	4626033	ENSACAG00000003823	6	68208253	Scaffold751	2009552	355	CM012323.1	81967674	327	scaffold328	1889900	309	ULFQ01000121.1	1607938	326
100752	MREG	HGNC:25478	CVI CM012323.1			Colubroidea											ENSACAG00000003820	6	68255346	Scaffold751	2035973	128	CM012323.1	81994003	105	scaffold328	1870622	108	ULFQ01000121.1	1594556	90
100753	TCAP	HGNC:11610	CVI CM012323.1			Colubroidea					ENSG00000173991	17	39664187							Scaffold751	2058738	75	CM012323.1	82032912	48	scaffold328	1782586	57	ULFQ01000121.1	1576325	60
100754	PNMT	HGNC:9160	CVI CM012323.1			Colubroidea					ENSG00000141744	17	39667981	ENSGALG00000027281	27	4647259	ENSACAG00000003800	6	68289536	Scaffold751	1949776	228	CM012323.1	82033576	216	scaffold328	1835225	217	ULFQ01000121.1	1565220	213
100755	PGAP3	HGNC:23719	CVI CM012323.1			Colubroidea					ENSG00000161395	17	39671122	ENSGALG00000022030	27	4650005	ENSACAG00000003751	6	68284072	Scaffold751	2082344	292	CM012323.1	82061026	288	scaffold328	1813443	288	ULFQ01000121.1	1540524	285
100756	ERBB2	HGNC:3430	CVI CM012323.1			Colubroidea					ENSG00000141736	17	39687914	ENSGALG00000031529	27	4653390	ENSACAG00000003496	6	68362453	Scaffold751	2133480	970	CM012323.1	82118987	950	scaffold328	1731977	966	ULFQ01000121.1	1426673	953
100757	MIEN1	HGNC:28230	CVI CM012323.1			Colubroidea					ENSG00000141741	17	39728496	ENSGALG00000026328	27	4662820	ENSACAG00000003485	6	68408242	Scaffold751	2175755	104	CM012323.1	82159089	98	scaffold328	1721114	98	ULFQ01000121.1	1417542	99
100758	GRB7	HGNC:4567	CVI CM012323.1			Colubroidea					ENSG00000141738	17	39737927	ENSGALG00000036500	27	4665743	ENSACAG00000003395	6	68478056	Scaffold751	2244683	481	CM012323.1	82250639	409	scaffold328	1636938	434	ULFQ01000121.1	1317738	426
100759	RDH8	HGNC:14423	CVI CM012323.1			Colubroidea								ENSGALG00000027818	27	4671762	ENSACAG00000003358	6	68512743	Scaffold751	2279102	204	CM012323.1	82277089	235	scaffold328	1623255	266	ULFQ01000121.1	1306294	264
100760	IKZF3	HGNC:13178	CVI CM012323.1			Colubroidea					ENSG00000161405	17	39757715	ENSGALG00000013481	27	4678352	ENSACAG00000003308	6	68558456	Scaffold751	2310610	413	CM012323.1	82322375	345	scaffold328	1567225	344	ULFQ01000121.1	1256068	307
100761	ZPBP2	HGNC:20678	CVI CM012323.1			Colubroidea					ENSG00000186075	17	39868164	ENSGALG00000013484	27	4701630	ENSACAG00000003285	6	68611943	Scaffold751	2357783	221	CM012323.1	82374866	222	scaffold328	1526655	218	ULFQ01000121.1	1204945	202
100762	LRRC3C	HGNC:40034	CVI CM012323.1			Colubroidea					ENSG00000204913	17	39941474	ENSGALG00000026789	27	4711632	ENSACAG00000003283	6	68690136	Scaffold751	2398147	249	CM012323.1	82422911	249	scaffold328	1495743	249	ULFQ01000121.1	1159931	248
100763	ORMDL3	HGNC:16038	CVI CM012323.1			Colubroidea					ENSG00000172057	17	39921041	ENSGALG00000029142	27	4717240	ENSACAG00000003273	6	68783671	Scaffold751	2462418	147	CM012323.1	82495896	147	scaffold328	1412994	147	ULFQ01000121.1	1069060	144
100764	GSDMB	HGNC:23690	NSC ULFQ01000121.1			Colubroidea					ENSG00000073605	17	39904595	ENSGALG00000013495	27	4726168	ENSACAG00000022624	6	68892986	Scaffold751	2360742	73				scaffold328	1367226	65	ULFQ01000121.1	1021786	31
100765	PSMD3	HGNC:9560	Published as ancestral sex-linked	Vicoso_et_al_2013a:Dataset_S1,Table_S4,Table_S5(ENSACAG00000003160); Yin_et_al_2016:Supp_Fig_32	ZW Pair	Colubroidea	yes	yes	yes		ENSG00000130725	19	58555712	ENSGALG00000043628	AADN04000777.1	977	ENSACAG00000010698	GL343253.1	119455	Scaffold14669	43809	183	CM012323.1	95068431	183	scaffold1724	111781	183	ULFQ01000276.1	306099	183
100766	CSF3	HGNC:2438	CVI CM012323.1			Colubroidea					ENSG00000108342	17	40015361	ENSGALG00000030907	27	4737417	ENSACAG00000026820	6	68967305	Scaffold751	2556906	60	CM012323.1	82592635	37	scaffold328	1324539	35
100767	MED24	HGNC:22963	CVI CM012323.1			Colubroidea					ENSG00000008838	17	40019097	ENSGALG00000013506	27	4741105	ENSACAG00000003026	6	69002467	Scaffold751	2573158	886	CM012323.1	82624018	886	scaffold328	1224100	887	ULFQ01000121.1	827781	882
100768	THRA	HGNC:11796	CVI CM012323.1			Colubroidea					ENSG00000126351	17	40058290	ENSGALG00000040017	27	4626754	ENSACAG00000002898	6	69199274	Scaffold751	2766842	387	CM012323.1	82828531	385	scaffold328	1022504	386	ULFQ01000121.1	593070	337
100769	NR1D1	HGNC:7962	Published as ancestral sex-linked	Vicoso_et_al_2013a:Dataset_S1,Table_S4,Table_S5(ENSACAG00000002847)	ZW Pair	Colubroidea			yes		ENSG00000173801	17	41754604	ENSGALG00000017414	27	5081253	ENSACAG00000017889	6	71138167	Scaffold2258	745733	714	CM012323.1	84699343	707	scaffold1159	151622	694	ULFQ01000030.1	9843923	686
100770	MSL1	HGNC:27905	Published as ancestral sex-linked	Vicoso_et_al_2013a:Dataset_S1,Table_S4,Table_S5(ENSACAG00000002768); Yin_et_al_2016:Supp_Fig_32; Perry_et_al_2018:Fig_3	ZW Pair	Colubroidea	yes	yes	yes		ENSG00000067082	10	3775996	ENSGALG00000033178	2	11799038	ENSACAG00000001166	6	9648830	Scaffold933	732811	263	CM012307.1	47126689	225	scaffold128	911601	260	ULFQ01000043.1	6793440	259
100771	CASC3	HGNC:17040	CVI CM012323.1			Colubroidea					ENSG00000108349	17	40140318	ENSGALG00000031813	27	4793851	ENSACAG00000002674	6	69422393	Scaffold751	2912791	562	CM012323.1	83002711	575	scaffold328	896544	575	ULFQ01000121.1	454307	574
100772	RAPGEFL1	HGNC:17428	CVI CM012323.1			Colubroidea					ENSG00000108352	17	40177010	ENSGALG00000035690	27	4804726	ENSACAG00000002541	6	69545041	Scaffold751	3009831	459	CM012323.1	83121163	457	scaffold328	772155	435	ULFQ01000121.1	308758	454
100773	WIPF2	HGNC:30923	CVI CM012323.1			Colubroidea					ENSG00000171475	17	40219304	ENSGALG00000037633	27	4817671	ENSACAG00000002522	6	69595881	Scaffold751	3070593	361	CM012323.1	83182347	346	scaffold328	725810	372	ULFQ01000121.1	274588	352
100774	CDC6	HGNC:1744	CVI CM012323.1			Colubroidea					ENSG00000094804	17	40287633	ENSGALG00000036519	27	4823987	ENSACAG00000002503	6	69630079	Scaffold751	3087555	389	CM012323.1	83205462	389	scaffold328	690900	357	ULFQ01000121.1	244217	337
100775	RARA	HGNC:9864	Published as ancestral sex-linked	Vicoso_et_al_2013a:Dataset_S1(ENSACAG00000002413)	ZW Pair	Colubroidea		yes			ENSG00000095787	10	28532493	ENSGALG00000035281	2	15342791	ENSACAG00000007583	6	13819205	Scaffold1329	3698116	572	CM012323.1	16281766	553	scaffold52	1170422	559	ULFQ01000043.1	1573809	563
100776	GJD3	HGNC:19147	CVI CM012323.1			Colubroidea					ENSG00000183153	17	40362931				ENSACAG00000002406	6	69990067	Scaffold751	3331855	203	CM012323.1	83555749	200	scaffold328	436949	200	ULFQ01000139.1	395721	89
100777	TOP2A	HGNC:11989	Published as ancestral sex-linked	Vicoso_et_al_2013a:Table_S5(ENSACAG00000001904)	ZW Pair	Colubroidea			yes		ENSG00000135220	4	68928463	ENSGALG00000011805	4	52117096	ENSACAG00000009562	6	58560593	Scaffold1500	417843	286	CM012323.1	84975863	236	scaffold276	557951	268	ULFQ01000298.1	284439	241
100778	IGFBP4	HGNC:5473	CVI CM012323.1			Colubroidea					ENSG00000141753	17	40443461	ENSGALG00000040672	27	4865485	ENSACAG00000016160	6	70118817	Scaffold751	3422663	216	CM012323.1	83676615	210	scaffold328	285863	212	ULFQ01000275.1	584460	208
100779	TNS4	HGNC:24352	CVI CM012323.1			Colubroidea					ENSG00000131746	17	40475828	ENSGALG00000028308	27	4872138	ENSACAG00000016132	6	70223876	Scaffold751	3502268	362	CM012323.1	83755829	323	scaffold328	220451	346	ULFQ01000275.1	509159	366
100780	CCR7	HGNC:1608	CVI CM012323.1			Colubroidea					ENSG00000126353	17	40553769	ENSGALG00000035733	27	4891171	ENSACAG00000016124	6	70284520	Scaffold751	3560649	253	CM012323.1	83823005	259	scaffold328	185269	240	ULFQ01000275.1	472686	228
100781	SMARCE1	HGNC:11109	CVI CM012323.1			Colubroidea					ENSG00000073584	17	40624962	ENSGALG00000003882	27	4907122	ENSACAG00000016067	6	70322676	Scaffold2258	1414778	408	CM012323.1	83866322	407	scaffold328	110634	409	ULFQ01000275.1	388890	406
100782	KRT222	HGNC:28695	CVI CM012323.1			Colubroidea				KRT	ENSG00000213424	17	40654665	ENSGALG00000003859	27	4924119	ENSACAG00000016060	6	70359764	Scaffold2258	1383117	228	CM012323.1	83920466	210	scaffold328	71980	211	ULFQ01000275.1	311707	156
100783	KRT26	HGNC:30840	CVI CM012323.1			Colubroidea				KRT	ENSG00000186393	17	40766238							Scaffold2258	1017392	195	CM012323.1	83938029	209	scaffold328	23050	192	ULFQ01000275.1	70007	200
100784	KRT12	HGNC:6414	CVI CM012323.1			Colubroidea				KRT	ENSG00000187242	17	40860943	ENSGALG00000019715	27	4933245	ENSACAG00000017866	6	70460684	Scaffold2258	1017404	280	CM012323.1	83955882	266	scaffold328	41075	248	ULFQ01000275.1	69899	268
100785	KRT24	HGNC:18527	CVI CM012323.1			Colubroidea				KRT	ENSG00000167916	17	40697991				ENSACAG00000028648	6	70390670	Scaffold2258	1361863	355	CM012323.1	83955885	338	scaffold328	57989	356	ULFQ01000275.1	296869	359
100786	KRT20	HGNC:20412	CVI CM012323.1			Colubroidea				KRT	ENSG00000171431	17	40875941	ENSGALG00000019716	27	4939479				Scaffold2258	1170997	189	CM012323.1	83972261	196	scaffold1431	142819	165	ULFQ01000275.1	70067	212
100787	KRT24	HGNC:18527	CVI CM012323.1			Colubroidea				KRT	ENSG00000167916	17	40697991				ENSACAG00000015988	6	70410921	Scaffold2258	1345888	356	CM012323.1	83972261	340	scaffold328	41072	341	ULFQ01000275.1	278047	351
100788	KRT27	HGNC:30841	CVI CM012323.1			Colubroidea				KRT	ENSG00000171446	17	40776808							Scaffold2258	1017371	195	CM012323.1	83975998	202	scaffold328	23047	172	ULFQ01000275.1	70001	173
100789	KRT28	HGNC:30842	CVI CM012323.1			Colubroidea				KRT	ENSG00000173908	17	40792203							Scaffold2258	1017392	152	CM012323.1	83976001	181	scaffold328	12243	183	ULFQ01000275.1	70004	172
100790	KRT25	HGNC:30839	CVI CM012323.1			Colubroidea				KRT	ENSG00000204897	17	40748021							Scaffold2258	1017476	172	CM012323.1	83976025	176	scaffold328	12144	181	ULFQ01000275.1	260459	168
100791	KRT37	HGNC:6455	CVI CM012323.1			Colubroidea				KRT	ENSG00000108417	17	41420753							Scaffold2258	1017479	97	CM012323.1	84005017	84	scaffold1666	148344	79	ULFQ01000275.1	28696	96
100792	KRT23	HGNC:6438	CVI CM012323.1			Colubroidea				KRT	ENSG00000108244	17	40922696	ENSGALG00000039447	27	4952993	ENSACAG00000029308	6	70518981	Scaffold2258	1247098	312	CM012323.1	84105682	306	scaffold1431	91266	301	ULFQ01000275.1	161268	223
100793	KRT9	HGNC:6447	CVI CM012323.1			Colubroidea				KRT	ENSG00000171403	17	41565841	ENSGALG00000036846	27	5008680	ENSACAG00000027366	6	70731377	Scaffold2258	844797	256	CM012323.1	84126439	248	scaffold1666	55125	200	ULFQ01000275.1	28390	269
100794	KRT10	HGNC:6413	CVI CM012323.1			Colubroidea				KRT	ENSG00000186395	17	40818117	ENSGALG00000034349	27	4997791	ENSACAG00000029628	6	70702069	Scaffold2258	1136342	318	CM012323.1	84178107	323	scaffold1666	55020	325	ULFQ01000275.1	28321	346
100795	KRT15	HGNC:6421	CVI CM012323.1			Colubroidea				KRT	ENSG00000171346	17	41513743	ENSGALG00000019718	27	4965385	ENSACAG00000028720	6	70623216	Scaffold2258	1197503	343	CM012323.1	84178887	348	scaffold1666	147945	343	ULFQ01000275.1	94695	327
100796	KRT13	HGNC:6415	CVI CM012323.1			Colubroidea				KRT	ENSG00000171401	17	41500981	ENSGALG00000040050	27	5035698				Scaffold2258	972540	268	CM012323.1	84180634	279	scaffold1666	117369	282	ULFQ01000275.1	69878	277
100797	KRT32	HGNC:6449	CVI CM012323.1			Colubroidea				KRT	ENSG00000108759	17	41459811							Scaffold2258	1062609	135	CM012323.1	84180634	148	scaffold1159	475932	139	ULFQ01000030.1	10087493	137
100798	KRT19	HGNC:6436	CVI CM012323.1			Colubroidea				KRT	ENSG00000171345	17	41523617	ENSGALG00000019719	27	4972722	ENSACAG00000028562	6	70918797	Scaffold2258	1170796	303	CM012323.1	84180637	307	scaffold1666	117414	310	ULFQ01000275.1	69923	302
100799	KRT14	HGNC:6416	CVI CM012323.1			Colubroidea				KRT	ENSG00000186847	17	41582279							Scaffold2258	950417	283	CM012323.1	84180640	285	scaffold1159	425307	266	ULFQ01000030.1	10087208	272
100800	KRT31	HGNC:6448	CVI CM012323.1			Colubroidea				KRT	ENSG00000094796	17	41393724							Scaffold2258	1017485	152	CM012323.1	84180649	143	scaffold1159	475932	129	ULFQ01000030.1	10087493	106
100801	LOC100857659	CGNC:65374	CVI CM012323.1			Colubroidea				KRT				ENSGALG00000041858	27	4992064	ENSACAG00000027366	6	70731377	Scaffold2258	904754	245	CM012323.1	84261991	230	scaffold1666	54987	177	ULFQ01000275.1	28390	269
100802	LOC420039	CGNC:51161	CVI CM012323.1			Colubroidea				KRT				ENSGALG00000034054	27	5025846	ENSACAG00000017874	6	70763201	Scaffold2258	1017377	250	CM012323.1	84340756	239	scaffold1159	425562	256	ULFQ01000030.1	10087397	260
100803	KRT14	HGNC:6416	CVI CM012323.1			Colubroidea				KRT				ENSGALG00000003690	27	5042180	ENSACAG00000017879	6	70841228	Scaffold2258	1017317	322	CM012323.1	84397798	310	scaffold1159	442766	311	ULFQ01000030.1	10104948	323
100804	KRT17	HGNC:6427	CVI CM012323.1			Colubroidea				KRT	ENSG00000128422	17	41619441							Scaffold2258	1033581	281	CM012323.1	84397804	274	scaffold1159	442832	272	ULFQ01000275.1	70022	260
100805	EIF1	HGNC:3249	Published as ancestral sex-linked	Matsubara_et_al_2012:Fig_1; Yin_et_al_2016:Supp_Data_1	Z-Linked	Colubroidea					ENSG00000173812	17	41688885	ENSGALG00000028517	27	5064894	ENSACAG00000004404	6	70956314	Scaffold2258	943442	113	CM012323.1	84521036	113	scaffold1159	333984	113	ULFQ01000030.1	9995020	113
100806	P3H4	HGNC:16946	CVI CM012323.1			Colubroidea					ENSG00000141696	17	41801947	ENSGALG00000027462	27	5097554	ENSACAG00000017887	6	71024354	Scaffold2258	846408	353	CM012323.1	84560161	316	scaffold1159	276651	347	ULFQ01000030.1	9939206	350
100807	JUP	HGNC:6207	Published as ancestral sex-linked	Vicoso_et_al_2013a:Dataset_S1,Table_S4,Table_S5(ENSACAG00000017889)	ZW Pair	Colubroidea		yes			ENSG00000106462	7	148807383	ENSGALG00000043399	2	54453671	ENSACAG00000013910	6	53336734	Scaffold1158	59174	718	CM012323.1	62306533	722	scaffold163	144672	722	ULFQ01000167.1	1592398	726
100808	HAP1	HGNC:4812	CVI CM012323.1			Colubroidea					ENSG00000173805	17	41717742	ENSGALG00000023847	27	5070342	ENSACAG00000017899	6	71292275	Scaffold2258	673893	487	CM012323.1	84790568	372	scaffold1159	64713	393	ULFQ01000030.1	9724430	368
100809	SMIM19	HGNC:25166	NSC ULFQ01000298.1			Colubroidea					ENSG00000176209	8	42541155	ENSGALG00000029508	4	34429252	ENSACAG00000009226	6	58845830	Scaffold1500	586572	98	CM012307.1	16078019	33	scaffold2801	5822	92	ULFQ01000298.1	61689	91
100810	SULT1B1	HGNC:17845	CVI CM012323.1			Colubroidea					ENSG00000173597	4	69721162	ENSGALG00000023120	4	52137022	ENSACAG00000009304	6	58696591	Scaffold1500	464692	165	CM012323.1	84900462	190	scaffold276	631527	168	ULFQ01000298.1	205303	182
100811	SULT1E1	HGNC:11377	CVI CM012323.1			Colubroidea					ENSG00000109193	4	69841212							Scaffold1500	464743	83	CM012323.1	84900486	87	scaffold1070	452000	87	ULFQ01000092.1	3440714	64
100812	MUC17	HGNC:16800	CVI CM012323.1			Colubroidea											ENSACAG00000029637	6	58670244	Scaffold1500	446808	370	CM012323.1	84939004	384	scaffold276	594457	395	ULFQ01000298.1	254668	353
100813	UGT2A1	HGNC:12542	CVI CM012323.1			Colubroidea					ENSG00000173610	4	69588417							Scaffold1500	417912	318	CM012323.1	84975491	278	scaffold276	557951	287	ULFQ01000298.1	284439	203
100814	UGT2A2	HGNC:28183	CVI CM012323.1			Colubroidea					ENSG00000271271	4	69589309							Scaffold1500	417912	343	CM012323.1	84975503	279	scaffold276	557951	282	ULFQ01000298.1	283995	227
100815	UGT2A3	HGNC:28528	Published as ancestral sex-linked	Vicoso_et_al_2013a:Dataset_S1(ENSACAG00000009384),Table_S4,Table_S5(ENSACAG00000009562)	ZW Pair	Colubroidea		yes			ENSG00000146872	17	62458658	ENSGALG00000000410	27	2528979	ENSACAG00000016868	6	66043544	Scaffold751	194073	734	CM012323.1	79712311	723	scaffold526	1559921	726	ULFQ01000185.1	827409	722
100816	YTHDC1	HGNC:30626	Published as ancestral sex-linked	Vicoso_et_al_2013a:Dataset_S1(ENSACAG00000009697); Yin_et_al_2016:Supp_Fig_30	ZW Pair	Colubroidea	yes	yes	yes		ENSG00000120616	10	32267751	ENSGALG00000007169	2	14127254	ENSACAG00000007015	6	12508749	Scaffold1329	2497924	744	CM012323.1	14847839	665	scaffold2044	13648	699	ULFQ01000043.1	3047379	696
100817	RDM1	HGNC:19950	CVI CM012323.1			Colubroidea					ENSG00000278023	17	35918066	ENSGALG00000000243	27	1782741	ENSACAG00000012989	6	63392538	Scaffold1982	54719	123	CM012323.1	85047784	70	scaffold1159	17438	99	ULFQ01000030.1	9670414	133
100818	LRRC37A	HGNC:29069	CVI CM012323.1			Colubroidea					ENSG00000176681	17	46292733	ENSGALG00000000239	27	1777179	ENSACAG00000028160	6	63350780	Scaffold1982	70528	291	CM012323.1	85057130	112	scaffold1159	33023	127	ULFQ01000030.1	9689789	105
100819	FAM71A	HGNC:26541	CVI CM012323.1			Colubroidea					ENSG00000162771	1	212624474				ENSACAG00000017907	6	71330920	Scaffold2258	660895	97	CM012323.1	85097463	77	scaffold1159	4774	62	ULFQ01000030.1	9645176	95
100820	FAM71B	HGNC:28397	CVI CM012323.1			Colubroidea					ENSG00000170613	5	157161846							Scaffold2258	663247	64	CM012323.1	85097466	43	scaffold1159	5384	37	ULFQ01000030.1	9650095	38
100821	FAM71C	HGNC:28594	CVI CM012323.1			Colubroidea					ENSG00000180219	12	99647753							Scaffold2155	47651	51	CM012323.1	85097532	37	scaffold562	933820	29	ULFQ01000030.1	9627781	34
100822	CRHR1	HGNC:2357	CVI CM012323.1			Colubroidea					ENSG00000120088	17	45784280	ENSGALG00000000371	27	2399395	ENSACAG00000017912	6	71463186	Scaffold2258	500575	355	CM012323.1	85255344	375	scaffold1711	568542	378	ULFQ01000030.1	9401775	356
100823	ZSCAN30	HGNC:33517	CVI CM012323.1			Colubroidea								ENSGALG00000044225	4	71008301	ENSACAG00000017919	6	71581944	Scaffold2258	493893	244	CM012323.1	85350707	231	scaffold1711	565182	211	ULFQ01000030.1	9396818	210
100824	SMARCD2	HGNC:11107	CVI CM012323.1			Colubroidea					ENSG00000108604	17	63832081	ENSGALG00000029304	27	1877240	ENSACAG00000017920	6	71600075	Scaffold2258	433969	426	CM012323.1	85384415	419	scaffold1711	473317	442	ULFQ01000030.1	9309000	427
100825	PSMC5	HGNC:9552	CVI CM012323.1			Colubroidea					ENSG00000087191	17	63827152	ENSGALG00000000349	27	1872536	ENSACAG00000017921	6	71630181	Scaffold2258	422300	407	CM012323.1	85430350	399	scaffold1711	456208	399	ULFQ01000030.1	9294269	399
100826	FTSJ3	HGNC:17136	CVI CM012323.1			Colubroidea					ENSG00000108592	17	63819433	ENSGALG00000032993	27	1865257	ENSACAG00000017930	6	71658369	Scaffold2258	395707	539	CM012323.1	85450217	516	scaffold1711	427634	516	ULFQ01000030.1	9260593	526
100827	PRR29	HGNC:25673	CVI CM012323.1			Colubroidea					ENSG00000224383	17	63998351				ENSACAG00000026083	6	71758266	Scaffold2258	328181	36	CM012323.1	85558477	42	scaffold1711	346262	55	ULFQ01000030.1	9195414	43
100828	ASIC2	HGNC:99	CVI CM012323.1			Colubroidea					ENSG00000108684	17	33013087	ENSGALG00000000367	27	1939764	ENSACAG00000017932	6	71790428	Scaffold2258	152479	417	CM012323.1	85584001	417	scaffold1711	117732	417	ULFQ01000030.1	8621128	328
100829	ATP6V0A1	HGNC:865	Published as ancestral sex-linked	Matsubara_et_al_2012:Fig_1	Z-Linked	Colubroidea					ENSG00000033627	17	42458844	ENSGALG00000003256	27	5352969	ENSACAG00000017936	6	72357822	Scaffold62	2346368	793	CM012323.1	86182032	793	scaffold304	6545449	796	ULFQ01000030.1	8558304	787
100830	CAVIN1	HGNC:9688	CVI CM012323.1			Colubroidea					ENSG00000177469	17	42402452	ENSGALG00000003261	27	5335537	ENSACAG00000017939	6	72420099	Scaffold62	2313728	344	CM012323.1	86238755	343	scaffold304	6505857	341	ULFQ01000030.1	8515578	340
100831	STAT3	HGNC:11364	CVI CM012323.1			Colubroidea					ENSG00000168610	17	42313324	ENSGALG00000003267	27	5319501	ENSACAG00000017940	6	72499174	Scaffold62	2255283	735	CM012323.1	86311856	733	scaffold304	6435719	733	ULFQ01000030.1	8438435	732
100832	STAT5B	HGNC:11367	Published as ancestral sex-linked	Vicoso_et_al_2013a:Dataset_S1,Table_S4,Table_S5(ENSACAG00000017951)	ZW Pair	Colubroidea		yes	yes		ENSG00000144566	3	19947079	ENSGALG00000011272	2	35958094	ENSACAG00000000017	6	32947222	Scaffold446	1227854	210	CM012323.1	40227261	209	scaffold780	684975	209	ULFQ01000056.1	1097211	209
100833	PIBPPDD4L	NCBI:420029	CVI CM012323.1			Colubroidea								ENSGALG00000003345	27	5282575	ENSACAG00000017953	6	72701257	Scaffold62	2084471	953	CM012323.1	86466611	928	scaffold304	6312484	922	ULFQ01000030.1	8277399	931
100834	HCRT	HGNC:4847	CVI CM012323.1			Colubroidea					ENSG00000161610	17	42184060	ENSGALG00000011485	27	5280330	ENSACAG00000017956	6	72761703	Scaffold62	2071441	68	CM012323.1	86480192	68	scaffold304	6301752	66	ULFQ01000030.1	8262059	63
100835	KCNH4	HGNC:6253	CVI CM012323.1			Colubroidea					ENSG00000089558	17	42156891	ENSGALG00000003354	27	5271010	ENSACAG00000017957	6	72778967	Scaffold62	2014094	812	CM012323.1	86525867	739	scaffold304	6240597	760	ULFQ01000030.1	8188852	815
100836	KAT2B	HGNC:8638	CVI CM012323.1			Colubroidea					ENSG00000267261	17	42119674	ENSGALG00000003359	27	5260325	ENSACAG00000017960	6	72860441	Scaffold62	1983491	265	CM012323.1	86602464	255	scaffold304	6203500	256	ULFQ01000030.1	8157193	245
100837	KAT2A	HGNC:4201	CVI CM012323.1			Colubroidea					ENSG00000108773	17	42113108	ENSGALG00000003369	27	5249880	ENSACAG00000017962	6	72877634	Scaffold62	1968305	776	CM012323.1	86610219	761	scaffold304	6185549	762	ULFQ01000030.1	8135674	740
100838	NAGLU	HGNC:7632	CVI CM012323.1			Colubroidea					ENSG00000108784	17	42536172	ENSGALG00000032610	27	5381307	ENSACAG00000017964	6	72905690	Scaffold62	1955001	548	CM012323.1	86641822	533	scaffold304	6170794	535	ULFQ01000030.1	8110263	528
100839	COASY	HGNC:29932	CVI CM012323.1			Colubroidea					ENSG00000068120	17	42561467	ENSGALG00000028866	27	5386659	ENSACAG00000017967	6	72932077	Scaffold62	1933469	442	CM012323.1	86657723	416	scaffold304	6150409	418	ULFQ01000030.1	8093601	421
100840	COQ10B	HGNC:25819	CVI CM012323.1			Colubroidea											ENSACAG00000017968	6	72956736	Scaffold62	1919870	143	CM012323.1	86681176	134	scaffold304	6136759	138	ULFQ01000030.1	8076837	110
100841	cisd3	NCBI:100556592	CVI CM012323.1			Colubroidea											ENSACAG00000029122	6	72969606	Scaffold62	1915459	72	CM012323.1	86686606	67	scaffold304	6133956	68	ULFQ01000030.1	8074201	71
100842	MLLT6	HGNC:7138	CVI CM012323.1			Colubroidea					ENSG00000275023	17	38705542	ENSGALG00000034693	27	4376159	ENSACAG00000017970	6	72993971	Scaffold62	1792040	865	CM012323.1	86705540	837	scaffold304	6014365	852	ULFQ01000030.1	7950675	835
100843	EPOP	HGNC:34493	CVI CM012323.1			Colubroidea					ENSG00000273604	17	38671703				ENSACAG00000017973	6	73193635	Scaffold288	1165639	93	CM012323.1	86869065	71	scaffold304	5959993	71	ULFQ01000030.1	7878572	72
100844	SRCIN1	HGNC:29506	CVI CM012323.1			Colubroidea					ENSG00000277363	17	38530016	ENSGALG00000032628	27	4277584	ENSACAG00000007498	6	73272088	Scaffold62	1378285	995	CM012323.1	87208864	950	scaffold612	38448	965	ULFQ01000030.1	7455696	965
100845	ARHGAP23	HGNC:29293	CVI CM012323.1			Colubroidea					ENSG00000275832	17	38419280	ENSGALG00000042628	27	4266387	ENSACAG00000007448	6	73716023	Scaffold62	1315271	1123	CM012323.1	87377840	1076	scaffold1010	1509525	714	ULFQ01000030.1	7396332	1104
100846	SOCS7	HGNC:29846	Published as ancestral sex-linked	Vicoso_et_al_2013a:Dataset_S1,Table_S4,Table_S5(ENSACAG00000007418)	ZW Pair	Colubroidea			yes		ENSG00000108468	17	48070052	ENSGALG00000033926	27	4168580	ENSACAG00000006594	6	74984824	Scaffold62	192630	183	CM012323.1	88702832	182	scaffold1010	293593	182	ULFQ01000030.1	6179581	180
100847	GPR179	HGNC:31371	CVI CM012323.1			Colubroidea					ENSG00000277399	17	38325530	ENSGALG00000037179	27	4095356	ENSACAG00000007374	6	73989446	Scaffold62	1092005	965	CM012323.1	87661912	857	scaffold1010	1252938	875	ULFQ01000030.1	7135461	861
100848	MRPL45	HGNC:16651	CVI CM012323.1			Colubroidea					ENSG00000278845	17	38297023	ENSGALG00000038109	27	4083525	ENSACAG00000007343	6	74047232	Scaffold62	970142	167	CM012323.1	87666553	165	scaffold1010	1235148	149	ULFQ01000030.1	7116205	148
100849	NPEPPS	HGNC:7900	Published as ancestral sex-linked	Vicoso_et_al_2013a:Dataset_S1(ENSACAG00000007242)	ZW Pair	Colubroidea			yes		ENSG00000159217	17	48997412	ENSGALG00000041204	27	3648588	ENSACAG00000006199	6	76016809	Scaffold932	788073	572	CM012323.1	89797981	572	scaffold105	3273594	572	ULFQ01000030.1	4961833	569
100850	KPNB1	HGNC:6400	Published as ancestral sex-linked	Vicoso_et_al_2013a:Dataset_S1(ENSACAG00000007097); Yin_et_al_2016:Supp_Fig_32	ZW Pair	Colubroidea	yes	yes	yes		ENSG00000148444	10	22315974	ENSGALG00000007900	2	17759039	ENSACAG00000009052	6	16354011	Scaffold1329	5997333	160	CM012323.1	24005286	157	scaffold1353	986433	157	ULFQ01000077.1	3716694	152
100851	TBKBP1	HGNC:30140	CVI CM012323.1			Colubroidea					ENSG00000198933	17	47694081	ENSGALG00000029558	27	4013152	ENSACAG00000007079	6	74276973	Scaffold62	806572	552	CM012323.1	87970944	540	scaffold1010	961289	546	ULFQ01000030.1	6834899	543
100852	TBX21	HGNC:11599	CVI CM012323.1			Colubroidea					ENSG00000073861	17	47733244				ENSACAG00000007044	6	74470000	Scaffold62	658740	344	CM012323.1	88130988	341	scaffold1010	798217	341	ULFQ01000030.1	6684655	338
100853	OSBPL7	HGNC:16387	CVI CM012323.1			Colubroidea					ENSG00000006025	17	47807372	ENSGALG00000032149	27	4232184	ENSACAG00000006906	6	74486570	Scaffold62	623369	730	CM012323.1	88167684	737	scaffold1010	753889	695	ULFQ01000030.1	6644252	726
100854	MRPL10	HGNC:14055	CVI CM012323.1			Colubroidea					ENSG00000159111	17	47823272	ENSGALG00000014387	27	4229341	ENSACAG00000006889	6	74534231	Scaffold62	599240	161	CM012323.1	88215382	156	scaffold753	317370	148	ULFQ01000030.1	6615872	155
100855	LRRC46	HGNC:25047	CVI CM012323.1			Colubroidea					ENSG00000141294	17	47831627	ENSGALG00000046384	27	4226296	ENSACAG00000006887	6	74546704	Scaffold62	591606	73	CM012323.1	88228065	52	scaffold1010	709584	72	ULFQ01000030.1	6606795	70
100856	SCRN2	HGNC:30381	CVI CM012323.1			Colubroidea					ENSG00000141295	17	47837692	ENSGALG00000035853	27	4223293	ENSACAG00000006837	6	74557329	Scaffold62	578101	349	CM012323.1	88241983	340	scaffold1010	686814	305	ULFQ01000030.1	6592804	308
100857	SP6	HGNC:14530	CVI CM012323.1			Colubroidea					ENSG00000189120	17	47844908				ENSACAG00000006831	6	74601683	Scaffold62	547646	333	CM012323.1	88291534	331	scaffold1010	650103	329	ULFQ01000030.1	6536509	330
100858	SP2	HGNC:11207	Published as ancestral sex-linked	Vicoso_et_al_2013a:Dataset_S1,Table_S4,Table_S5(ENSACAG00000006793); Yin_et_al_2016:Supp_Fig_32	ZW Pair	Colubroidea	yes	yes	yes		ENSG00000168283	10	22321211	ENSGALG00000041267	2	17748562	ENSACAG00000023169	6	16337346	Scaffold1329	5983543	282	CM012323.1	24018098	280	scaffold1353	1000279	280	ULFQ01000077.1	3703427	282
100859	PNPO	HGNC:30260	CVI CM012323.1			Colubroidea					ENSG00000108439	17	47941506	ENSGALG00000036683	27	4199230	ENSACAG00000006764	6	74755617	Scaffold62	363333	208	CM012323.1	88484400	187	scaffold1010	488817	209	ULFQ01000030.1	6374463	207
100860	PRR15L	HGNC:28149	CVI CM012323.1			Colubroidea					ENSG00000167183	17	47951967	ENSGALG00000046413	27	4196301	ENSACAG00000006762	6	74774441	Scaffold62	350419	90	CM012323.1	88508078	88	scaffold1010	470657	88	ULFQ01000030.1	6359934	88
100861	CDK5RAP3	HGNC:18673	CVI CM012323.1			Colubroidea					ENSG00000108465	17	47967810	ENSGALG00000036452	27	4192063	ENSACAG00000006686	6	74795487	Scaffold62	319909	413	CM012323.1	88518179	393	scaffold1010	440394	397	ULFQ01000030.1	6321129	398
100862	COPZ2	HGNC:19356	CVI CM012323.1			Colubroidea					ENSG00000005243	17	48026167				ENSACAG00000006651	6	74901552	Scaffold62	237502	157	CM012323.1	88634764	153	scaffold1010	345431	158	ULFQ01000030.1	6231281	156
100863	NFE2L1	HGNC:7781	Published as ancestral sex-linked	Vicoso_et_al_2013a:Dataset_S1,Table_S4,Table_S5(ENSACAG00000006615); Yin_et_al_2016:Supp_Fig_32	ZW Pair	Colubroidea	yes	yes			ENSG00000108424	17	47649476	ENSGALG00000036962	27	4030720	ENSACAG00000007097	6	74188491	Scaffold62	911293	846	CM012323.1	87893136	856	scaffold1010	1043472	855	ULFQ01000030.1	6930324	858
100864	CBX1	HGNC:1551	Published as ancestral sex-linked	Vicoso_et_al_2013a:Dataset_S1(ENSACAG00000006594)	ZW Pair	Colubroidea		yes			ENSG00000173757	17	42199168	ENSGALG00000003282	27	5296817	ENSACAG00000017951	6	72573138	Scaffold62	2144499	747	CM012323.1	86441685	706	scaffold304	6372138	707	ULFQ01000030.1	8343811	707
100865	SNX11	HGNC:14975	CVI CM012323.1			Colubroidea					ENSG00000002919	17	48103357	ENSGALG00000017553	27	4162427	ENSACAG00000006556	6	75001101	Scaffold62	163548	141	CM012323.1	88745252	138	scaffold1010	254687	139	ULFQ01000030.1	6147464	137
100866	SKAP1	HGNC:15605	CVI CM012323.1			Colubroidea					ENSG00000141293	17	48133440	ENSGALG00000027305	27	4135527	ENSACAG00000006534	6	75121061	Scaffold62	36584	100	CM012323.1	88848140	122	scaffold1010	132617	108	ULFQ01000030.1	6008454	103
100867	HOXB1	HGNC:5111	CVI CM012323.1			Colubroidea					ENSG00000120094	17	48528526	ENSGALG00000013454	27	3879443	ENSACAG00000006529	6	75455961	Scaffold932	319807	121	CM012323.1	89340394	105	scaffold105	3794610	110	ULFQ01000030.1	5567884	120
100868	HOXB2	HGNC:5113	CVI CM012323.1			Colubroidea					ENSG00000173917	17	48540894	ENSGALG00000025774	27	3869146	ENSACAG00000006521	6	75492178	Scaffold932	348299	178	CM012323.1	89367758	169	scaffold105	3770258	162	ULFQ01000030.1	5543015	165
100869	HOXB3	HGNC:5114	CVI CM012323.1			Colubroidea					ENSG00000120093	17	48548870	ENSGALG00000043219	27	3861027	ENSACAG00000006508	6	75513232	Scaffold932	361338	313	CM012323.1	89380340	298	scaffold105	3755152	316	ULFQ01000030.1	5527738	312
100870	HOXB4	HGNC:5115	CVI CM012323.1			Colubroidea					ENSG00000182742	17	48575513	ENSGALG00000000284	27	3835226	ENSACAG00000006499	6	75565658	Scaffold932	400682	216	CM012323.1	89418347	219	scaffold105	3719449	217	ULFQ01000030.1	5492196	217
100871	HOXB5	HGNC:5116	CVI CM012323.1			Colubroidea					ENSG00000120075	17	48591257	ENSGALG00000034907	27	3818138	ENSACAG00000006484	6	75593542	Scaffold932	422858	207	CM012323.1	89439236	222	scaffold105	3697826	225	ULFQ01000030.1	5470612	226
100872	HOXB6	HGNC:5117	CVI CM012323.1			Colubroidea					ENSG00000108511	17	48595751	ENSGALG00000037619	27	3813038	ENSACAG00000006474	6	75598780	Scaffold932	428332	195	CM012323.1	89444388	193	scaffold105	3692151	192	ULFQ01000030.1	5465117	196
100873	HOXB7	HGNC:5118	CVI CM012323.1			Colubroidea					ENSG00000260027	17	48607227	ENSGALG00000032740	27	3799423	ENSACAG00000006434	6	75614839	Scaffold932	442296	194	CM012323.1	89457503	194	scaffold105	3677045	187	ULFQ01000030.1	5449841	194
100874	HOXB8	HGNC:5119	CVI CM012323.1			Colubroidea					ENSG00000120068	17	48611377	ENSGALG00000040320	27	3795352	ENSACAG00000006423	6	75623536	Scaffold932	449882	227	CM012323.1	89464545	227	scaffold105	3672244	227	ULFQ01000030.1	5445273	228
100875	HOXB9	HGNC:5120	CVI CM012323.1			Colubroidea					ENSG00000170689	17	48621159	ENSGALG00000001276	27	3782436	ENSACAG00000006412	6	75637047	Scaffold932	460921	210	CM012323.1	89475498	205	scaffold105	3658897	206	ULFQ01000030.1	5431965	218
100876	HOXB13	HGNC:5112	CVI CM012323.1			Colubroidea					ENSG00000159184	17	48724763	ENSGALG00000033154	27	3743555	ENSACAG00000006408	6	75781126	Scaffold932	568711	118	CM012323.1	89569476	117	scaffold105	3542892	121	ULFQ01000030.1	5300634	135
100877	TTLL6	HGNC:26664	CVI CM012323.1			Colubroidea					ENSG00000170703	17	48762235				ENSACAG00000006363	6	75881864	Scaffold932	636231	381	CM012323.1	89647670	370	scaffold105	3456650	382	ULFQ01000030.1	5197252	373
100878	CALCOCO2	HGNC:29912	CVI CM012323.1			Colubroidea					ENSG00000136436	17	48830988	ENSGALG00000001525	27	3710068	ENSACAG00000006352	6	75917227	Scaffold932	674039	215	CM012323.1	89684497	122	scaffold105	3422944	182	ULFQ01000030.1	5161840	131
100879	ATP5MC1	HGNC:841	CVI CM012323.1			Colubroidea					ENSG00000159199	17	48892765	ENSGALG00000001330	27	3706954	ENSACAG00000006341	6	75946647	Scaffold932	721476	123	CM012323.1	89716027	119	scaffold105	3396998	90	ULFQ01000030.1	5125026	112
100880	UBE2Z	HGNC:25847	Published as ancestral sex-linked	Vicoso_et_al_2013a:Dataset_S1(ENSACAG00000006311)	ZW Pair	Colubroidea			yes		ENSG00000121067	17	49598884	ENSGALG00000009939	27	3351576	ENSACAG00000004879	6	76707647	Scaffold932	1437261	373	CM012323.1	90532936	371	W_scaffold1240	67823	372	ULFQ01000030.1	4286975	371
100881	SNF8	HGNC:17028	CVI CM012323.1			Colubroidea					ENSG00000159210	17	48929316	ENSGALG00000001309	27	3690044	ENSACAG00000006297	6	75968571	Scaffold932	752567	249	CM012323.1	89758186	245	scaffold105	3359616	246	ULFQ01000030.1	5082894	246
100882	GIP	HGNC:4270	CVI CM012323.1			Colubroidea					ENSG00000159224	17	48958554	ENSGALG00000001299	27	3682114	ENSACAG00000006291	6	75985447	Scaffold932	768203	62	CM012323.1	89776288	59	scaffold105	3349598	56	ULFQ01000030.1	5073633	56
100883	IGF2BP1	HGNC:28866	Published as ancestral sex-linked	Vicoso_et_al_2013a:Dataset_S1(ENSACAG00000006199)	ZW Pair	Colubroidea		yes			ENSG00000161654	17	44034635	ENSGALG00000039803	KQ759560.1	10484	ENSACAG00000004618	6	78366077	Scaffold4163	443899	190	CM012323.1	92281993	188	W_scaffold2299	2084	187	ULFQ01000411.1	142919	189
100884	B4GALNT2	HGNC:24136	CVI CM012323.1			Colubroidea					ENSG00000167080	17	49132460				ENSACAG00000006165	6	76112782	Scaffold932	860596	239	CM012323.1	89892138	210	scaffold167	479466	97	ULFQ01000030.1	4931412	224
100885	GNGT2	HGNC:4412	CVI CM012323.1			Colubroidea					ENSG00000167083	17	49202791	ENSGALG00000031205	27	3637559	ENSACAG00000024163	6	76181008	Scaffold932	906153	61	CM012323.1	89938748	60	scaffold828	1272897	59	ULFQ01000030.1	4912957	57
100886	ABI3	HGNC:29859	CVI CM012323.1			Colubroidea					ENSG00000108798	17	49210227	ENSGALG00000044071	27	3632536	ENSACAG00000006110	6	76199630	Scaffold932	923006	196	CM012323.1	89958029	185	scaffold828	1232169	186	ULFQ01000030.1	4870600	184
100887	PHOSPHO1	HGNC:16815	CVI CM012323.1			Colubroidea					ENSG00000173868	17	49223362	ENSGALG00000033683	27	3628878	ENSACAG00000006108	6	76222734	Scaffold932	944937	232	CM012323.1	89981396	219	scaffold828	1227475	213	ULFQ01000030.1	4863480	218
100888	ZNF652	HGNC:29147	Published as ancestral sex-linked	Vicoso_et_al_2013a:Dataset_S1(ENSACAG00000006063)	ZW Pair	Colubroidea			yes		ENSG00000108813	17	49968970	ENSGALG00000045023	27	3214410	ENSACAG00000005126	6	77068112	Scaffold932	1805397	141	CM012323.1	91020852	139	scaffold828	203465	139	ULFQ01000030.1	3765064	139
100889	PHB	HGNC:8912	CVI CM012323.1			Colubroidea					ENSG00000167085	17	49404049	ENSGALG00000038604	27	3579366	ENSACAG00000004797	6	76297413	Scaffold932	1026703	257	CM012323.1	90078896	257	scaffold828	1114248	260	ULFQ01000030.1	4767978	257
100890	NGFR	HGNC:7809	CVI CM012323.1			Colubroidea					ENSG00000064300	17	49495293	ENSGALG00000035950	27	3423153	ENSACAG00000004836	6	76476817	Scaffold932	1216684	321	CM012323.1	90155715	322	scaffold828	880670	321	ULFQ01000030.1	4505221	330
100891	NXPH3	HGNC:8077	CVI CM012323.1			Colubroidea					ENSG00000182575	17	49575858	ENSGALG00000038645	27	3390901	ENSACAG00000004878	6	76651415	Scaffold932	1384685	222	CM012323.1	90473074	222	scaffold828	731379	210	ULFQ01000030.1	4342270	199
100892	SPOP	HGNC:11254	Published as ancestral sex-linked	Vicoso_et_al_2013a:Dataset_S1(ENSACAG00000004879)	ZW Pair	Colubroidea		yes			ENSG00000143761	1	228082660	ENSGALG00000005393	2	2395981	ENSACAG00000006923	6	3287210	Scaffold898	911483	181	CM012306.1	91248114	174	scaffold915	216651	181	ULFQ01000613.1	102324	181
100893	SLC35B1	HGNC:20798	CVI CM012323.1			Colubroidea					ENSG00000121073	17	49700934	ENSGALG00000035057	27	3337888	ENSACAG00000004966	6	76772751	Scaffold932	1518270	299	CM012323.1	90670879	296	scaffold828	538259	295	ULFQ01000030.1	4162336	294
100894	FAM117A	HGNC:24179	CVI CM012323.1			Colubroidea					ENSG00000121104	17	49710332	ENSGALG00000009943	27	3309705	ENSACAG00000004992	6	76798984	Scaffold932	1537961	287	CM012323.1	90692746	235	W_scaffold526	85520	249	ULFQ01000030.1	4133398	230
100895	KAT7	HGNC:17016	Published as ancestral sex-linked	Matsubara_et_al_2006:Fig_5(MYST2); Matsubara_et_al_2012:Fig_1; Vicoso_et_al_2013a:Dataset_S1(ENSACAG00000005025); Yin_et_al_2016:Supp_Fig_32	ZW Pair	Colubroidea	yes	yes			ENSG00000167182	17	47896150	ENSGALG00000000233	27	4203293	ENSACAG00000006793	6	74714580	Scaffold62	414028	538	CM012323.1	88401517	512	W_scaffold1796	3395	515	ULFQ01000030.1	6402518	492
100896	DLX4	HGNC:2917	Published as ancestral sex-linked	Vicoso_et_al_2013a:Table_S4,Table_S5(ENSACAG00000005126)	ZW Pair	Colubroidea		yes			ENSG00000015171	10	134465	ENSGALG00000006599	2	9883490	ENSACAG00000002297	6	7543513	Scaffold1630	1245872	592	CM012323.1	8870249	245	scaffold849	544840	587	ULFQ01000337.1	315444	580
100897	DLX3	HGNC:2916	Published as ancestral sex-linked	Vicoso_et_al_2013a:Dataset_S1(ENSACAG00000005130)	ZW Pair	Colubroidea		yes			ENSG00000107929	10	806914	ENSGALG00000006672	2	10303090	ENSACAG00000002858	6	8001269	Scaffold1630	919094	658	CM012323.1	9430072	570	scaffold849	77093	574	ULFQ01000534.1	23794	549
100898	ITGA3	HGNC:6139	Published as ancestral sex-linked	Vicoso_et_al_2013a:Dataset_S1(ENSACAG00000026628)	ZW Pair	Colubroidea		yes			ENSG00000164548	7	23504780	ENSGALG00000010973	2	31337782	ENSACAG00000013502	6	30627836	Scaffold403	172869	269	CM012323.1	34793066	269	scaffold547	600471	266	ULFQ01000097.1	407692	270
100899	PDK2	HGNC:8810	CVI CM012323.1			Colubroidea					ENSG00000005882	17	50094737	ENSGALG00000045846	27	3176885	ENSACAG00000005384	6	77269978	Scaffold932	1994906	386	CM012323.1	91265151	387	scaffold1629	22899	386	ULFQ01000030.1	3514668	387
100900	SAMD14	HGNC:27312	CVI CM012323.1			Colubroidea					ENSG00000167100	17	50110040	ENSGALG00000046427	AADN04004294.1	9765	ENSACAG00000024778	6	77298327	Scaffold932	2028214	369	CM012323.1	91293984	367	scaffold1629	55148	368	ULFQ01000030.1	3486212	364
100901	PPP1R9B	HGNC:9298	CVI CM012323.1			Colubroidea					ENSG00000108819	17	50133735	ENSGALG00000029276	AADN04002558.1	21	ENSACAG00000005320	6	77371655	Scaffold932	2065388	736	CM012323.1	91329022	731	scaffold1629	89753	730	ULFQ01000030.1	3382498	736
100902	SGCA	HGNC:10805	CVI CM012323.1			Colubroidea					ENSG00000108823	17	50164214	ENSGALG00000029917	AADN04002558.1	11945	ENSACAG00000023160	6	77499836	Scaffold932	2175441	254	CM012323.1	91465971	253	scaffold1629	244116	249	ULFQ01000030.1	3268168	262
100903	H1-9P	HGNC:30616	CVI CM012323.1			Colubroidea											ENSACAG00000024181	6	77508053	Scaffold932	2187010	60	CM012323.1	91483416	59	scaffold1629	250248	59	ULFQ01000030.1	3291640	60
100904	COL1A1	HGNC:2197	Published as ancestral sex-linked	Vicoso_et_al_2013a:Dataset_S1(ENSACAG00000005084)	ZW Pair	Colubroidea		yes			ENSG00000105991	7	27092993	ENSGALG00000028095	2	32634688	ENSACAG00000010967	GL343275.1	1540176	Scaffold670	1365134	202	CM012323.1	36544555	199	scaffold922	1242683	178	ULFQ01000056.1	5280165	176
100905	MPP2	HGNC:7220	CVI CM012323.1			Colubroidea					ENSG00000108852	17	43875357	ENSGALG00000035580	27	5615996	ENSACAG00000004972	6	77760869	Scaffold932	2380154	539	CM012323.1	91688418	534	scaffold1629	433672	427	ULFQ01000030.1	3001959	530
100906	PYY	HGNC:9748	CVI CM012323.1			Colubroidea					ENSG00000131096	17	43952738	ENSGALG00000043915	KQ759560.1	2460	ENSACAG00000004967	6	77845819	Scaffold731	64	43	CM012323.1	91772188	65	scaffold1561	645550	66	ULFQ01000030.1	2942766	48
100907	TMEM101	HGNC:28653	CVI CM012323.1			Colubroidea					ENSG00000091947	17	44011188	ENSGALG00000043148	KQ759560.1	8520	ENSACAG00000004948	6	77902640	Scaffold4163	40918	237	CM012323.1	91818503	239	scaffold1561	596228	234	ULFQ01000030.1	2868522	235
100908	ETV4	HGNC:3493	CVI CM012323.1			Colubroidea					ENSG00000175832	17	43527844	ENSGALG00000036678	27	3550456	ENSACAG00000004827	6	77931456	Scaffold4163	54510	318	CM012323.1	91836165	280	scaffold1561	561006	294	ULFQ01000030.1	2829092	306
100909	MEOX1	HGNC:7013	CVI CM012323.1			Colubroidea					ENSG00000005102	17	43640388	ENSGALG00000001191	27	3530597	ENSACAG00000004805	6	78013024	Scaffold4163	130297	105	CM012323.1	91918164	70	scaffold1046	131477	73	ULFQ01000097.1	3962600	64
100910	SOST	HGNC:13771	CVI CM012323.1			Colubroidea					ENSG00000167941	17	43753731	ENSGALG00000009929	27	3504160	ENSACAG00000004803	6	78082781	Scaffold4163	200771	165	CM012323.1	92024468	130	scaffold1561	410227	131	ULFQ01000030.1	2666006	132
100911	DUSP3	HGNC:3069	CVI CM012323.1			Colubroidea					ENSG00000108861	17	43766121	ENSGALG00000035369	27	3491886	ENSACAG00000004781	6	78113140	Scaffold4163	225610	180	CM012323.1	92046865	173	scaffold1561	386986	133	ULFQ01000030.1	2618389	175
100912	LOC100555542	NCBI:100555542	CVI CM012323.1			Colubroidea											ENSACAG00000028613	6	78137820	Scaffold4163	249405	142	CM012323.1	92071147	133	scaffold1561	352820	120	ULFQ01000030.1	2598533	140
100913	CFAP97D1	HGNC:37241	CVI CM012323.1			Colubroidea					ENSG00000231256	17	43780435	ENSGALG00000046316	27	3483420	ENSACAG00000004771	6	78163988	Scaffold4163	267755	79	CM012323.1	92090521	74	scaffold1561	340065	73	ULFQ01000030.1	2583482	42
100914	MPP3	HGNC:7221	CVI CM012323.1			Colubroidea					ENSG00000161647	17	43800799	ENSGALG00000042521	27	3468036	ENSACAG00000004676	6	78192292	Scaffold4163	292383	530	CM012323.1	92111907	532	scaffold1561	259633	523	ULFQ01000030.1	2487607	527
100915	KCNJ9	HGNC:6270	CVI CM012323.1			Colubroidea								ENSGALG00000009935	27	3456946	ENSACAG00000004639	6	78302366	Scaffold4163	390463	443	CM012323.1	92216211	442	scaffold1561	197401	443	ULFQ01000030.1	2429459	442
100916	SLIT2	HGNC:11086	CVI CM012323.1			Colubroidea											ENSACAG00000028312	6	78353154	Scaffold4163	421507	291	CM012323.1	92258173	289	scaffold1561	177611	285	ULFQ01000030.1	2407389	287
100917	LSM12	HGNC:26407	Published as ancestral sex-linked	Vicoso_et_al_2013a:Dataset_S1,Table_S4,Table_S5(ENSACAG00000004618); Perry_et_al_2018:Fig_3; W-linked in DAC?	ZW Pair	Colubroidea		yes	yes		ENSG00000114853	3	42653684	ENSGALG00000005287	2	2017519	ENSACAG00000006705	6	2703474	Scaffold9982	344232	413	CM012307.1	63639147	379	scaffold56	458369	394	ULFQ01000189.1	381889	403
100918	G6PC3	HGNC:24861	CVI CM012323.1			Colubroidea					ENSG00000141349	17	44070735	ENSGALG00000031147	KQ759560.1	16480	ENSACAG00000004570	6	78382690	Scaffold4163	458953	255	CM012323.1	92314494	187	scaffold1561	110556	253	ULFQ01000030.1	2358167	248
100919	HDAC5	HGNC:14068	Published as ancestral sex-linked	Vicoso_et_al_2013a:Dataset_S1(ENSACAG00000004207)	ZW Pair	Colubroidea		yes			ENSG00000170142	3	23805903	ENSGALG00000011286	2	37271244	ENSACAG00000008926	GL343357.1	682188	Scaffold502	2303920	193	CM012323.1	41587660	148	scaffold473	99404	193	ULFQ01000260.1	390209	193
100920	CCDC47	HGNC:24856	CVI CM012323.1			Colubroidea					ENSG00000108588	17	63745250	ENSGALG00000000564	27	2980911	ENSACAG00000004111	6	78524940	Scaffold4163	598795	420	CM012323.1	92470788	417	scaffold1152	654667	413	ULFQ01000030.1	2189777	415
100921	STRADA	HGNC:30172	CVI CM012323.1			Colubroidea					ENSG00000125695	17	63702845							Scaffold4163	600443	53	CM012323.1	92472706	53	scaffold1152	676903	53	ULFQ01000030.1	2206678	53
100922	DDX42	HGNC:18676	Published as ancestral sex-linked	Vicoso_et_al_2013a:Dataset_S1(ENSACAG00000003994)	ZW Pair	Colubroidea		yes			ENSG00000163788	3	43286512	ENSGALG00000039920	2	41159960	ENSACAG00000015044	1	192747288	Scaffold494	1213565	747	CM012323.1	46644373	738	scaffold465	1123892	738	ULFQ01000228.1	311530	733
100923	LOC428277	CGNC:53310	CVI CM012323.1			Colubroidea								ENSGALG00000019797	27	3008186	ENSACAG00000003901	6	78582977	Scaffold4163	645362	364	CM012323.1	92568616	358	scaffold1152	557292	358	ULFQ01000030.1	2145832	358
100924	ARL5C	HGNC:31111	CVI CM012323.1			Colubroidea					ENSG00000141748	17	39156894				ENSACAG00000003879	6	78621647	Scaffold4163	691303	169	CM012323.1	92618217	153	scaffold1152	504241	151	ULFQ01000030.1	2085780	154
100925	PLXDC1	HGNC:20945	CVI CM012323.1			Colubroidea					ENSG00000161381	17	39063303	ENSGALG00000023881	27	4507019	ENSACAG00000003812	6	78654645	Scaffold4163	742673	356	CM012323.1	92670844	354	scaffold1152	419800	320	ULFQ01000030.1	1968678	307
100926	FBXO47	HGNC:31969	CVI CM012323.1			Colubroidea					ENSG00000204952	17	38936432	ENSGALG00000019738	27	4490929	ENSACAG00000014090	6	80711854	Scaffold4163	793613	339	CM012323.1	92729853	297	scaffold1152	385016	297	ULFQ01000030.1	1936832	232
100927	LASP1	HGNC:6513	Published as ancestral sex-linked	Vicoso_et_al_2013a:Dataset_S1,Table_S4,Table_S5(ENSACAG00000014046); Yin_et_al_2016:Supp_Fig_32	ZW Pair	Colubroidea	yes	yes			ENSG00000010361	19	49806869	ENSGALG00000039850	AADN04017088.1	21	ENSACAG00000028153	6	80184805	Scaffold3668	48999	345	CM012323.1	93276357	343	scaffold1084	159400	322	ULFQ01000030.1	1370045	314
100928	IRF3	HGNC:6118	CVI CM012323.1			Colubroidea					ENSG00000126456	19	49659569				ENSACAG00000014027	6	80616269	Scaffold4163	883355	125	CM012323.1	92819325	176	scaffold1152	297708	142	ULFQ01000030.1	1832333	169
100929	SCAF1	HGNC:30403	Published as ancestral sex-linked	Vicoso_et_al_2013a:Dataset_S1,Table_S4,Table_S5(ENSACAG00000014008); Yin_et_al_2016:Supp_Fig_32	ZW Pair	Colubroidea	yes	yes			ENSG00000131467	17	42824385	ENSGALG00000002937	27	5483514	ENSACAG00000013688	6	62293798	Scaffold1982	791467	251	CM012323.1	73272095	250	scaffold592	169080	246	ULFQ01000368.1	165143	249
100930	RRAS	HGNC:10447	Published as ancestral sex-linked	Vicoso_et_al_2013a:Dataset_S1,Table_S4,Table_S5(ENSACAG00000013955)	ZW Pair	Colubroidea		yes			ENSG00000168036	3	41194741	ENSGALG00000037203	2	43601202	ENSACAG00000004408	GL343224.1	861339	Scaffold1029	134317	776	CM012323.1	49544449	774	scaffold83	594868	773	ULFQ01000103.1	1448080	771
100931	PRR12	HGNC:29217	Published as ancestral sex-linked	Vicoso_et_al_2013a:Dataset_S1(ENSACAG00000027532)	ZW Pair	Colubroidea		yes			ENSG00000122545	7	35800932	ENSGALG00000032830	2	47074449	ENSACAG00000007341	6	46678898	Scaffold2782	250151	418	CM012323.1	54812460	416	scaffold378	1430728	416	ULFQ01000067.1	3776545	412
100932	PRRG2	HGNC:9470	CVI CM012323.1			Colubroidea					ENSG00000126460	19	49580646				ENSACAG00000028912	6	80474588	Scaffold4163	995888	126	CM012323.1	92945031	112	scaffold1152	172039	110	ULFQ01000030.1	1712670	112
100933	NOSIP	HGNC:17946	Published as ancestral sex-linked	Yin_et_al_2016:Supp_Data_1	Z-Linked	Colubroidea					ENSG00000142546	19	49555711				ENSACAG00000013921	6	80453902	Scaffold4163	1038997	272	CM012323.1	92987464	273	scaffold1152	121655	274	ULFQ01000030.1	1658860	277
100934	RCN3	HGNC:21145	CVI CM012323.1			Colubroidea					ENSG00000142552	19	49527618				ENSACAG00000013873	6	80437670	Scaffold4163	1048684	270	CM012323.1	93001244	267	scaffold1152	112328	266	ULFQ01000030.1	1650472	268
100935	PAX6	HGNC:8620	CVI CM012323.1			Colubroidea											ENSACAG00000013797	6	80382567	Scaffold4163	1093868	116	CM012323.1	93045708	113	scaffold1152	70550	113	ULFQ01000030.1	1604170	112
100936	CPT1C	HGNC:18540	CVI CM012323.1			Colubroidea					ENSG00000169169	19	49690898				ENSACAG00000013620	6	80273467	Scaffold4163	1184522	605	CM012323.1	93146597	631	scaffold1084	22185	636	ULFQ01000030.1	1477793	626
100937	TSKS	HGNC:30719	CVI CM012323.1			Colubroidea					ENSG00000126467	19	49739753				ENSACAG00000013575	6	80233851	Scaffold21838	14006	208	CM012323.1	93179327	193	scaffold1084	51064	248	ULFQ01000030.1	1422264	235
100938	AP2A1	HGNC:561	Published as ancestral sex-linked	Vicoso_et_al_2013a:Dataset_S1,Table_S4,Table_S5(ENSACAG00000013405); Yin_et_al_2016:Supp_Fig_32	ZW Pair	Colubroidea	yes		yes		ENSG00000136504	17	49788555	ENSGALG00000009944	27	3297083	ENSACAG00000005025	6	76859588	Scaffold932	1591286	596	CM012323.1	90759907	591	scaffold828	458001	591	ULFQ01000030.1	4056699	588
100939	FUZ	HGNC:26219	Published as ancestral sex-linked	Vicoso_et_al_2013a:Dataset_S1,Table_S4,Table_S5(ENSACAG00000028153); Yin_et_al_2016:Supp_Fig_32(ENSACAG00000028153)	ZW Pair	Colubroidea	yes	yes	yes		ENSG00000163527	3	31532638	ENSGALG00000011465	2	40275866	ENSACAG00000014453	1	193858835	Scaffold494	343043	776	CM012323.1	45447361	789	scaffold465	78558	776	ULFQ01000154.1	165729	789
100940	MED25	HGNC:28845	CVI CM012323.1			Colubroidea					ENSG00000104973	19	49818279				ENSACAG00000013334	6	80160082	Scaffold3668	57022	655	CM012323.1	93284985	626	scaffold1084	167664	648	ULFQ01000030.1	1347004	646
100941	PTOV1	HGNC:9632	CVI CM012323.1			Colubroidea					ENSG00000104960	19	49850735							Scaffold3668	72222	119	CM012323.1	93296951	117	scaffold1084	182949	117	ULFQ01000030.1	1349741	130
100942	LHB	HGNC:6584	CVI CM012323.1			Colubroidea											ENSACAG00000013327	6	80158039	Scaffold3668	81580	89	CM012323.1	93305685	81	scaffold1084	192093	84	ULFQ01000030.1	1344567	82
100943	NTF4	HGNC:8024	CVI CM012323.1			Colubroidea					ENSG00000225950	19	49061066				ENSACAG00000013323	6	80127662	Scaffold3668	100739	173	CM012323.1	93342027	175	scaffold1084	244001	175	ULFQ01000030.1	1303740	174
100944	KCNA7	HGNC:6226	CVI CM012323.1			Colubroidea					ENSG00000104848	19	49067418	ENSGALG00000036221	AADN04007468.1		ENSACAG00000013311	6	80043529	Scaffold3668	152972	374	CM012323.1	93409241	403	scaffold1084	300728	397	ULFQ01000030.1	1202782	406
100945	SNRNP70	HGNC:11150	Published as ancestral sex-linked	Vicoso_et_al_2013a:Dataset_S1(ENSACAG00000013276); Yin_et_al_2016:Supp_Fig_32	ZW Pair	Colubroidea	yes		yes		ENSG00000002834	17	38869859	ENSGALG00000039299	27	4466769	ENSACAG00000014046	6	80647701	Scaffold4163	832833	251	CM012323.1	92765812	229	scaffold1152	317921	252	ULFQ01000030.1	1875767	250
100946	LIN7B	HGNC:17788	CVI CM012323.1			Colubroidea					ENSG00000104863	19	49114324	ENSGALG00000030321	AADN04010111.1	237	ENSACAG00000013247	6	80007145	Scaffold3668	199977	193	CM012323.1	93472273	194	scaffold1084	354814	187	ULFQ01000030.1	1155126	193
100947	PPFIA3	HGNC:9247	CVI CM012323.1			Colubroidea					ENSG00000177380	19	49119389				ENSACAG00000013088	6	79905552	Scaffold3668	241433	1127	CM012323.1	93527966	1134	scaffold1084	401323	1136	ULFQ01000030.1	1064573	1135
100948	TRPM4	HGNC:17993	CVI CM012323.1			Colubroidea					ENSG00000130529	19	49157741				ENSACAG00000012814	6	79824026	Scaffold3668	309707	900	CM012323.1	93611340	948	scaffold1084	479861	944	ULFQ01000030.1	983537	904
100949	PNKP	HGNC:9154	CVI CM012323.1			Colubroidea					ENSG00000039650	19	49859882				ENSACAG00000012743	6	79802832	Scaffold3668	345131	425	CM012323.1	93654658	441	scaffold1084	527026	443	ULFQ01000030.1	951406	439
100950	RUVBL2	HGNC:10475	CVI CM012323.1			Colubroidea					ENSG00000183207	19	48993448	ENSGALG00000036359	KQ759715.1	21	ENSACAG00000012639	6	79796611	Scaffold3668	358217	454	CM012323.1	93671360	451	scaffold1084	544234	453	ULFQ01000030.1	942844	447
100951	BCL2L12	HGNC:13787	CVI CM012323.1			Colubroidea					ENSG00000126453	19	49665142	ENSGALG00000000497	26	1522348	ENSACAG00000028537	6	79782525	Scaffold3668	371035	161	CM012323.1	93685733	165	scaffold1084	560966	159	ULFQ01000030.1	927127	154
100952	NR1H2	HGNC:7965	NSC ULFQ01000030.1			Colubroidea					ENSG00000131408	19	50329653				ENSACAG00000012517	6	79745911	Scaffold3668	401918	391	CM012308.1	48754866	389	scaffold1084	582375	377	ULFQ01000030.1	906639	392
100953	POLD1	HGNC:9175	CVI CM012323.1			Colubroidea					ENSG00000062822	19	50384204				ENSACAG00000023481	6	79699157	Scaffold3668	434049	1018	CM012323.1	93758005	1000	scaffold1084	616104	1001	ULFQ01000030.1	847690	996
100954	SPIB	HGNC:11242	CVI CM012323.1			Colubroidea					ENSG00000269404	19	50418938				ENSACAG00000029484	6	79664031	Scaffold3668	478709	163	CM012323.1	93800087	122	scaffold1084	661059	145	ULFQ01000030.1	823379	91
100955	MYBPC2	HGNC:7550	CVI CM012323.1			Colubroidea					ENSG00000086967	19	50432903				ENSACAG00000012342	6	79585777	Scaffold3668	496260	929	CM012323.1	93816609	938	scaffold1084	673300	927	ULFQ01000030.1	740693	942
100956	FAM71E1	HGNC:25107	CVI CM012323.1			Colubroidea					ENSG00000142530	19	50466785				ENSACAG00000012337	6	79580684	Scaffold3668	560656	127	CM012323.1	93875837	86	scaffold1084	741425	108	ULFQ01000030.1	730446	106
100957	EMC10	HGNC:27609	CVI CM012323.1			Colubroidea					ENSG00000161671	19	50476400				ENSACAG00000012308	6	79571628	Scaffold3668	573598	202	CM012323.1	93971713	168	scaffold1084	480989	182	ULFQ01000030.1	717657	196
100958	SYT3	HGNC:11511	CVI CM012323.1			Colubroidea					ENSG00000213023	19	50621307				ENSACAG00000012232	6	79497006	Scaffold3668	591311	500	CM012323.1	93988491	496	scaffold1084	771243	498	ULFQ01000030.1	684923	493
100959	C19orf81	HGNC:40041	CVI CM012323.1			Colubroidea					ENSG00000235034	19	50649445				ENSACAG00000012228	6	79441365	Scaffold3668	663544	97	CM012323.1	94057122	95	scaffold1084	850214	95	ULFQ01000030.1	613310	96
100960	SHANK1	HGNC:15474	CVI CM012323.1			Colubroidea					ENSG00000161681	19	50661827				ENSACAG00000012124	6	79302998	Scaffold3668	678620	1684	CM012323.1	94074743	1694	scaffold1084	868469	1706	ULFQ01000030.1	531464	1670
100961	CLEC11A	HGNC:10576	CVI CM012323.1			Colubroidea					ENSG00000105472	19	50723329				ENSACAG00000012109	6	79261143	Scaffold3668	776215	223	CM012323.1	94265948	219	scaffold1084	969372	206	ULFQ01000030.1	470481	221
100962	LRRC4B	HGNC:25042	CVI CM012323.1			Colubroidea					ENSG00000131409	19	50516892				ENSACAG00000012085	6	78943097	Scaffold3668	1032062	606	CM012323.1	94543572	605	W_scaffold2727	14739	617	ULFQ01000030.1	180938	605
100963	ASPDH	HGNC:33856	CVI CM012323.1			Colubroidea					ENSG00000204653	19	50511600				ENSACAG00000012061	6	78872251	Scaffold3668	1113335	231	CM012323.1	94627732	220	scaffold1084	1358295	225	ULFQ01000030.1	74267	208
100964	JOSD2	HGNC:28853	CVI CM012323.1			Colubroidea					ENSG00000161677	19	50505998				ENSACAG00000012050	6	78845194	Scaffold3668	1134219	162	CM012323.1	94646066	161	scaffold1084	1373557	161	ULFQ01000030.1	56728	157
100965	RBFOX1	HGNC:18222	CVI CM012323.1			Colubroidea											ENSACAG00000011931	6	78796480	Scaffold3668	1156828	302	CM012323.1	94668213	294	scaffold1084	1394981	288	ULFQ01000030.1	15415	299
100966	THAP7	HGNC:23190	CVI CM012323.1			Colubroidea					ENSG00000184436	22	20999104	ENSGALG00000036459	AADN04001138.1	26199	ENSACAG00000011895	6	78771256	Scaffold18382	12562	267	CM012323.1	94767030	256	scaffold1084	1499827	258	ULFQ01000212.1	20115	255
100967	OR5V1	HGNC:13972	CVI CM012323.1			Colubroidea				OR							ENSACAG00000011889	6	78757250	Scaffold45905	1944	203	CM012323.1	94810868	159	scaffold1084	1537792	151	ULFQ01000276.1	9958	156
100968	SLC27A5	HGNC:10999	CVI CM012323.1			Colubroidea					ENSG00000083807	19	58479512	ENSGALG00000034772	AADN04001138.1	18688	ENSACAG00000022906	6	78733048	Scaffold1686	350035	247	CM012323.1	94835018	236	scaffold74	182274	284	ULFQ01000276.1	38645	251
100969	ZBTB45	HGNC:23715	CVI CM012323.1			Colubroidea					ENSG00000119574	19	58513530	ENSGALG00000033174	AADN04001603.1	4529	ENSACAG00000010650	GL343253.1	38475	Scaffold14669	142900	542	CM012323.1	94973757	529	scaffold1724	13228	531	ULFQ01000276.1	152905	518
100970	ZNF420	HGNC:20649	CVI CM012323.1			Colubroidea											ENSACAG00000010664	GL343253.1	56039	Scaffold14669	101565	366	CM012323.1	95001321	368	scaffold1724	44911	367	ULFQ01000276.1	218447	368
100971	OR2T1	HGNC:8277	CVI CM012323.1			Colubroidea				OR	ENSG00000175143	1	248403048							Scaffold237	1004660	137	CM012323.1	95013563	148	scaffold175	1111389	141	ULFQ01000258.1	217854	119
100972	TRIM28	HGNC:16384	Published as candidate W-linked	Vicoso_et_al_2013a:Dataset_S1(ENSACAG00000010694)	ZW Pair	Colubroidea		yes			ENSG00000106588	7	42916857	ENSGALG00000039387	2	51323804	ENSACAG00000017511	6	50521783	Scaffold689	730223	234	CM012323.1	58569185	234	scaffold6	565017	234	ULFQ01000357.1	348684	233
100973	UBE2M	HGNC:12491	Published as ancestral sex-linked	Vicoso_et_al_2013a:Table_S6	ZW Pair	Ambiguous: Colubroidea?		yes			ENSG00000012048	17	43044295	ENSGALG00000002781	27	5573536	ENSACAG00000013415	6	62756363	Scaffold1982	478961	259	CM012323.1	73813822	230	scaffold592	573824	252	ULFQ01000278.1	134405	207
100974	CHMP2A	HGNC:30216	CVI CM012323.1			Ambiguous: Colubroidea?					ENSG00000130724	19	58551566	ENSGALG00000032583	AADN04009019.1	5744	ENSACAG00000010711	GL343253.1	141822	Scaffold14669	30022	214	CM012323.1	95086362	213	scaffold1724	130024	213	ULFQ01000276.1	322994	213
100975	ELSPBP1	HGNC:14417	CVI CM012323.1			Ambiguous: Colubroidea?				ELSPBP1	ENSG00000169393	19	47994651				ENSACAG00000028839	GL343253.1	246599	Scaffold2604	31085	247	CM012323.1	95157421	246	scaffold1724	196992	242	ULFQ01000276.1	406986	242
100976	BSPH1	HGNC:33906	DAC scaffold1724			Ambiguous: Colubroidea?					ENSG00000188334	19	47968046							Scaffold2201	41920	35				scaffold1724	193967	36
100977	ELSPBP1	HGNC:14417	CVI CM012323.1			Ambiguous: Colubroidea?				ELSPBP1	ENSG00000169393	19	47994651				ENSACAG00000029124	GL343253.1	288791	Scaffold2201	11904	198	CM012323.1	95160845	203	scaffold1724	193964	219	ULFQ01000276.1	413907	209
100978	ELSPBP1	HGNC:14417	CVI CM012323.1			Ambiguous: Colubroidea?				ELSPBP1							ENSACAG00000010744	GL343253.1	224859	Scaffold2201	15638	55	CM012323.1	95162684	54	scaffold1724	197049	53	ULFQ01000276.1	429670	45
100979	ELSPBP1	HGNC:14417	CVI CM012323.1			Ambiguous: Colubroidea?				ELSPBP1	ENSG00000169393	19	47994651				ENSACAG00000029230	GL343253.1	263332	Scaffold2201	50896	126	CM012323.1	95202144	123	scaffold1724	191882	140	ULFQ01000276.1	415417	146
100980	OR11H6	HGNC:15349	CVI CM012323.1			Ambiguous: Colubroidea?				OR	ENSG00000176219	14	20223710							Scaffold1973	33771	131	CM012323.1	95207102	150	scaffold920	90721	152	ULFQ01000442.1	81163	146
100981	OR6V1	HGNC:15090	CVI CM012323.1			Ambiguous: Colubroidea?				OR	ENSG00000225781	7	143052320							Scaffold6238	52749	108	CM012323.1	95250751	150	scaffold875	150841	109	ULFQ01000676.1	54361	108
100982	OR13H1	HGNC:14755	CVI CM012323.1			Ambiguous: Colubroidea?				OR	ENSG00000171054	X	131543976							Scaffold3097	113098	104	CM012323.1	95262540	133	scaffold1717	283356	119	ULFQ01000205.1	331032	133
100983	ELSPBP1	HGNC:14417	CVI CM012323.1			Ambiguous: Colubroidea?				ELSPBP1	ENSG00000169393	19	47994651				ENSACAG00000010748	GL343253.1	318758	Scaffold2201	11820	129	CM012323.1	95284287	133	scaffold1724	193940	136	ULFQ01000276.1	523074	134
100984	OR10H3	HGNC:8174	Published as candidate W-linked	Vicoso_et_al_2013a:Dataset_S1(ENSACAG00000010760)	ZW Pair?	Ambiguous: Colubroidea?			yes	OR	ENSG00000171936	19	15737985	ENSGALG00000031385	AADN04000541.1	280025	ENSACAG00000010760	GL343253.1	344362	Scaffold15710	255	182	CM012323.1	95312060	228	scaffold474	133617	216	ULFQ01000276.1	577043	223
100985	OR7C2	HGNC:8374	CVI CM012323.1			Ambiguous: Colubroidea?				OR	ENSG00000127529	19	14941489							Scaffold98	295991	128	CM012323.1	95312081	145	scaffold821	541926	128	ULFQ01000304.1	453599	131
100986	OR7G1	HGNC:8465	CVI CM012323.1			Ambiguous: Colubroidea?				OR	ENSG00000161807	19	9114828							Scaffold989	6949	109	CM012323.1	95312150	123	scaffold474	33643	113	ULFQ01000304.1	259079	101
100987	OR2AJ1	HGNC:15001	CVI CM012323.1			Ambiguous: Colubroidea?				OR	ENSG00000177275	1	247924889							Scaffold4516	77608	94	CM012323.1	95312222	134	scaffold666	105624	96	ULFQ01000258.1	144022	97
100988	OR9Q1	HGNC:14724	CVI CM012323.1			Ambiguous: Colubroidea?				OR	ENSG00000186509	11	58023881	ENSGALG00000035443	AADN04001168.1	29464				Scaffold3097	57664	111	CM012323.1	95324920	129	scaffold666	26882	120	ULFQ01000304.1	359462	115
100989	ENSACAG00000016695	ENSEMBL:ENSACAG00000016695	CVI CM012323.1			Ambiguous: Colubroidea?				OR							ENSACAG00000016695	GL343326.1	614284	Scaffold3389	253422	251	CM012323.1	95330022	163	scaffold319	1050156	238	ULFQ01000058.1	36893	243
100990	OR7C1	HGNC:8373	CVI CM012323.1			Ambiguous: Colubroidea?				OR	ENSG00000127530	19	14789260							Scaffold98	295991	151	CM012323.1	95345217	148	scaffold821	494328	148	ULFQ01000258.1	764	143
100991	OR6C4	HGNC:19632	CVI CM012323.1			Ambiguous: Colubroidea?				OR	ENSG00000179626	12	55549602							Scaffold4544	30628	142	CM012323.1	95345235	164	scaffold169	111531	166	ULFQ01000666.1	12232	119
100992	OR10V1	HGNC:15136	CVI CM012323.1			Ambiguous: Colubroidea?				OR	ENSG00000172289	11	59712916							Scaffold4632	64129	165	CM012323.1	95345265	151	scaffold225	906030	146	ULFQ01000251.1	16963	125
100993	OR4K17	HGNC:15355	CVI CM012323.1			Ambiguous: Colubroidea?				OR	ENSG00000176230	14	20110739							Scaffold12699	61393	151	CM012323.1	95353845	156	scaffold920	123910	144	ULFQ01000442.1	259366	144
100994	OR1M1	HGNC:8220	CVI CM012323.1			Ambiguous: Colubroidea?				OR	ENSG00000170929	19	9087061							Scaffold4516	68670	129	CM012323.1	95355839	164	scaffold474	12450	140	ULFQ01000666.1	21832	120
100995	OR6C74	HGNC:31303	CVI CM012323.1			Ambiguous: Colubroidea?				OR	ENSG00000197706	12	55247198							Scaffold5699	57153	142	CM012323.1	95355845	167	scaffold169	131903	157	ULFQ01000265.1	599083	145
100996	OR10H3	HGNC:8174	CVI CM012323.1			Ambiguous: Colubroidea?				OR	ENSG00000171936	19	15737985				ENSACAG00000027953	GL343253.1	349726	Scaffold4544	5595	203	CM012323.1	95355848	201	scaffold875	116361	187	ULFQ01000676.1	12567	182
100997	OR6C68	HGNC:31297	CVI CM012323.1			Ambiguous: Colubroidea?				OR	ENSG00000205327	12	55492378							Scaffold4516	77590	129	CM012323.1	95355863	132	scaffold169	92419	110	ULFQ01000258.1	82218	128
100998	OR6C1	HGNC:8355	NSC ULFQ01000265.1			Ambiguous: Colubroidea?				OR	ENSG00000205330	12	55314343							Scaffold5699	763	142	CM012306.1	101031484	147	scaffold169	111549	166	ULFQ01000265.1	663252	153
100999	OR6C65	HGNC:31295	CVI CM012323.1			Ambiguous: Colubroidea?				OR	ENSG00000205328	12	55400430							Scaffold5699	57141	125	CM012323.1	95363283	151	scaffold169	92431	146	ULFQ01000265.1	618616	134
101000	OR11G2	HGNC:15346	CVI CM012323.1			Ambiguous: Colubroidea?				OR	ENSG00000196832	14	20190894							Scaffold793	49374	135	CM012323.1	95363304	147	scaffold920	82309	120	ULFQ01000442.1	81163	142
101001	OR5V1	HGNC:13972	CVI CM012323.1			Ambiguous: Colubroidea?				OR	ENSG00000227137	CHR_HSCHR6_MHC_SSTO_CTG1	29356146							Scaffold989	55449	186	CM012323.1	95376874	205	scaffold1075	159534	179	ULFQ01000666.1	115571	181
101002	OR1D5	HGNC:8186	CVI CM012323.1			Ambiguous: Colubroidea?				OR	ENSG00000262628	17	3062669							Scaffold98	296114	99	CM012323.1	95376940	112	scaffold666	28605	106	ULFQ01000082.1	4761231	108
101003	OR6C3	HGNC:15437	CVI CM012323.1			Ambiguous: Colubroidea?				OR	ENSG00000205329	12	55330043							Scaffold5699	57138	136	CM012323.1	95376979	147	scaffold169	44125	153	ULFQ01000265.1	618613	135
101004	OR2A25	HGNC:19562	CVI CM012323.1			Ambiguous: Colubroidea?				OR	ENSG00000221933	7	144069811							Scaffold50022	5637	129	CM012323.1	95397702	152	scaffold175	786743	140	ULFQ01000276.1	577040	118
101005	OR10Z1	HGNC:14996	CVI CM012323.1			Ambiguous: Colubroidea?				OR	ENSG00000198967	1	158605268							Scaffold3097	128184	126	CM012323.1	95397705	171	scaffold666	2607	143	ULFQ01000304.1	359480	139
101006	OR10X1	HGNC:14995	CVI CM012323.1			Ambiguous: Colubroidea?				OR	ENSG00000279111	1	158578919							Scaffold791	1494528	181	CM012323.1	95410123	133	scaffold666	274292	90	ULFQ01000258.1	442927	98
101007	OR11H4	HGNC:15347	CVI CM012323.1			Ambiguous: Colubroidea?				OR	ENSG00000176198	14	20239286							Scaffold5811	5124	125	CM012323.1	95410135	154	scaffold920	82204	142	ULFQ01000442.1	81265	119
101008	OR13C3	HGNC:14704	CVI CM012323.1			Ambiguous: Colubroidea?				OR	ENSG00000204246	9	104535749							Scaffold7443	39279	139	CM012323.1	95434907	157	scaffold175	834882	141	ULFQ01001065.1	23847	130
101009	OR7A17	HGNC:8363	CVI CM012323.1			Ambiguous: Colubroidea?				OR	ENSG00000185385	19	14878203							Scaffold3097	18713	128	CM012323.1	95441213	163	scaffold821	482758	137	ULFQ01000304.1	259082	131
101010	OR5H2	HGNC:14752	CVI CM012323.1			Ambiguous: Colubroidea?				OR	ENSG00000197938	3	98282888							Scaffold3097	18728	135	CM012323.1	95441282	142	scaffold666	30108	145	ULFQ01000304.1	518994	141
101011	OR13J1	HGNC:15108	CVI CM012323.1			Ambiguous: Colubroidea?				OR	ENSG00000168828	9	35869263							Scaffold8657	3325	107	CM012323.1	95447744	130	scaffold875	179903	116	ULFQ01000304.1	359462	115
101012	OR2M7	HGNC:19594	CVI CM012323.1			Ambiguous: Colubroidea?				OR	ENSG00000177186	1	248323630							Scaffold3097	18704	111	CM012323.1	95457962	126	scaffold666	138471	108	ULFQ01000304.1	312797	107
101013	OR10H3	HGNC:8174	CVI CM012323.1			Ambiguous: Colubroidea?				OR	ENSG00000171936	19	15737985				ENSACAG00000023599	GL343253.1	551097	Scaffold4516	62148	185	CM012323.1	95459804	193	scaffold875	123100	184	ULFQ01000676.1	12549	174
101014	OR10H3	HGNC:8174	CVI CM012323.1			Ambiguous: Colubroidea?				OR	ENSG00000171936	19	15737985				ENSACAG00000010884	GL343253.1	792258	Scaffold14576	29205	167	CM012323.1	95459807	198	scaffold474	33565	195	ULFQ01000276.1	577058	172
101015	OR2L8	HGNC:15014	CVI CM012323.1			Ambiguous: Colubroidea?				OR	ENSG00000279263	1	247948858							Scaffold3097	109569	120	CM012323.1	95483292	123	scaffold666	187026	108	ULFQ01000258.1	358605	121
101016	OR10J1	HGNC:8175	CVI CM012323.1			Ambiguous: Colubroidea?				OR	ENSG00000196184	1	159437845							Scaffold4516	68799	107	CM012323.1	95492418	142	scaffold666	13569	134	ULFQ01000304.1	359438	124
101017	OR13F1	HGNC:14723	CVI CM012323.1			Ambiguous: Colubroidea?				OR	ENSG00000186881	9	104504263							Scaffold3097	18716	131	CM012323.1	95501108	143	scaffold1075	36987	123	ULFQ01000258.1	405719	130
101018	OR7A5	HGNC:8368	CVI CM012323.1			Ambiguous: Colubroidea?				OR	ENSG00000188269	19	14824251							Scaffold98	306783	126	CM012323.1	95508230	155	scaffold666	160009	142	ULFQ01000304.1	290710	137
101019	OR10C1	HGNC:8165	CVI CM012323.1			Ambiguous: Colubroidea?				OR	ENSG00000204689	CHR_HSCHR6_MHC_MCF_CTG1	29439082							Scaffold4516	34606	171	CM012323.1	95508248	170	scaffold1724	334737	157	ULFQ01000258.1	115931	148
101020	OR10A7	HGNC:15329	CVI CM012323.1			Ambiguous: Colubroidea?				OR				ENSGALG00000045828	10	742516				Scaffold6238	21517	98	CM012323.1	95524203	116	scaffold474	108183	110	ULFQ01000304.1	248339	119
101021	OR13C5	HGNC:15100	CVI CM012323.1			Ambiguous: Colubroidea?				OR	ENSG00000277556	9	104598457							Scaffold3389	285267	112	CM012323.1	95536695	156	scaffold474	145790	130	ULFQ01000304.1	438996	104
101022	OR2T4	HGNC:15016	CVI CM012323.1			Ambiguous: Colubroidea?				OR	ENSG00000196944	1	248361581							Scaffold3097	109563	113	CM012323.1	95536701	147	scaffold175	1111389	124	ULFQ01000276.1	577136	106
101023	OR10G8	HGNC:14845	CVI CM012323.1			Ambiguous: Colubroidea?				OR	ENSG00000234560	11	124026798							Scaffold16463	3372	145	CM012323.1	95536707	115	scaffold863	106428	120	ULFQ01000389.1	139635	90
101024	PLA2G4C	HGNC:9037	CVI CM012323.1			Ambiguous: Colubroidea?					ENSG00000105499	19	48047843				ENSACAG00000028709	GL343253.1	430974	Scaffold18725	41806	188	CM012323.1	95569918	191	scaffold474	204880	151	ULFQ01000453.1	170294	209
101025	OR10T2	HGNC:14816	CVI CM012323.1			Ambiguous: Colubroidea?				OR	ENSG00000186306	1	158398522							Scaffold12924	38338	126	CM012323.1	95579805	150	scaffold1061	104841	127	ULFQ01000304.1	490826	115
101026	OR5K3	HGNC:31290	CVI CM012323.1			Ambiguous: Colubroidea?				OR	ENSG00000206536	3	98390666							Scaffold3097	18734	141	CM012323.1	95591705	148	scaffold666	177545	129	ULFQ01000304.1	274144	145
101027	OR1A2	HGNC:8180	CVI CM012323.1			Ambiguous: Colubroidea?				OR	ENSG00000172150	17	3197519							Scaffold4516	51676	109	CM012323.1	95591717	133	scaffold67	924924	103	ULFQ01000258.1	169357	109
101028	AFM	HGNC:316	CVI CM012323.1			Ambiguous: Colubroidea?					ENSG00000079557	4	73481683	ENSGALG00000011658	4	51190945	ENSACAG00000010772	GL343253.1	493847	Scaffold44997	0	22	CM012323.1	95674140	49	scaffold474	410268	44	ULFQ01005254.1	1261	50
101029	OR10H3	HGNC:8174	CVI CM012323.1			Ambiguous: Colubroidea?				OR	ENSG00000171936	19	15737985				ENSACAG00000028141	GL343253.1	517018	Scaffold4516	9709	208	CM012323.1	95690280	221	scaffold474	434176	221	ULFQ01000453.1	73250	215
101030	OR10A3	HGNC:8162	CVI CM012323.1			Ambiguous: Colubroidea?				OR	ENSG00000170683	11	7937171				ENSACAG00000022197	GL343253.1	636431	Scaffold50022	29481	211	CM012323.1	95690301	150	scaffold474	434197	130	ULFQ01000304.1	340004	105
101031	OR2M2	HGNC:8268	CVI CM012323.1			Ambiguous: Colubroidea?				OR	ENSG00000198601	1	248174821							Scaffold4516	62169	108	CM012323.1	95717802	138	scaffold666	75870	127	ULFQ01000304.1	453602	133
101032	OR2M4	HGNC:8270	CVI CM012323.1			Ambiguous: Colubroidea?				OR	ENSG00000171180	1	248231417							Scaffold3097	18716	103	CM012323.1	95719632	128	scaffold474	326265	115	ULFQ01000304.1	340010	122
101033	PLA2G4C	HGNC:9037	CVI CM012323.1			Ambiguous: Colubroidea?					ENSG00000105499	19	48047843				ENSACAG00000010980	GL343253.1	531468	Scaffold4516	42850	102	CM012323.1	95722410	180	scaffold474	468305	173	ULFQ01000453.1	17055	153
101034	OR1L1	HGNC:8213	CVI CM012323.1			Ambiguous: Colubroidea?				OR	ENSG00000173679	9	122661566							Scaffold98	233720	153	CM012323.1	95787055	159	scaffold666	181619	154	ULFQ01000304.1	397455	154
101035	OR1A1	HGNC:8179	CVI CM012323.1			Ambiguous: Colubroidea?				OR	ENSG00000172146	17	3207539							Scaffold98	296000	128	CM012323.1	95788344	145	scaffold666	177575	122	ULFQ01000258.1	169285	131
101036	OR10A7	HGNC:15329	CVI CM012323.1			Ambiguous: Colubroidea?				OR	ENSG00000179919	12	55221025							Scaffold989	6913	203	CM012323.1	95788356	182	scaffold1904	158090	182	ULFQ01000198.1	1309815	150
101037	OR2L3	HGNC:15009	CVI CM012323.1			Ambiguous: Colubroidea?				OR	ENSG00000198128	1	248046836							Scaffold3097	109569	120	CM012323.1	95788359	128	scaffold474	54915	108	ULFQ01000258.1	363922	112
101038	OR6M1	HGNC:14711	CVI CM012323.1			Ambiguous: Colubroidea?				OR	ENSG00000196099	11	123805335							Scaffold6238	46471	148	CM012323.1	95788410	158	scaffold1075	80208	159	ULFQ01000265.1	473021	154
101039	OR2T8	HGNC:15020	CVI CM012323.1			Ambiguous: Colubroidea?				OR	ENSG00000177462	1	247920252							Scaffold4516	72647	126	CM012323.1	95788452	128	scaffold175	1111407	108	ULFQ01000205.1	331032	107
101040	OR10H1	HGNC:8172	CVI CM012323.1			Ambiguous: Colubroidea?				OR	ENSG00000186723	19	15804549				ENSACAG00000024570	GL343253.1	565120	Scaffold4516	99084	251	CM012323.1	95798421	238	scaffold474	546941	239	ULFQ01000198.1	1309836	164
101041	OR2D3	HGNC:15146	CVI CM012323.1			Ambiguous: Colubroidea?				OR	ENSG00000178358	11	6920974							Scaffold237	1004642	148	CM012323.1	95798424	169	scaffold175	1111371	151	ULFQ01001065.1	23766	128
101042	OR2T12	HGNC:19592	CVI CM012323.1			Ambiguous: Colubroidea?				OR	ENSG00000177201	1	248290139							Scaffold4516	99240	102	CM012323.1	95798577	120	scaffold1075	85996	88	ULFQ01000304.1	377330	99
101043	OR6C2	HGNC:15436	CVI CM012323.1			Ambiguous: Colubroidea?				OR	ENSG00000179695	12	55444069							Scaffold1610	522524	121	CM012323.1	95811271	156	scaffold875	22649	148	ULFQ01000258.1	82215	105
101044	OR10A7	HGNC:15329	CVI CM012323.1			Ambiguous: Colubroidea?				OR							ENSACAG00000010991	GL343253.1	586000	Scaffold4516	138136	245	CM012323.1	95822789	237	scaffold1432	10493	230	ULFQ01001816.1	716	220
101045	OR2A2	HGNC:8230	CVI CM012323.1			Ambiguous: Colubroidea?				OR	ENSG00000221989	7	144109514							Scaffold989	6928	123	CM012323.1	95827029	139	scaffold175	1111398	133	ULFQ01007293.1	504	133
101046	OR56A3	HGNC:14786	CVI CM012323.1			Ambiguous: Colubroidea?				OR	ENSG00000184478	11	5938751							Scaffold52201	695	46	CM012323.1	95852981	79	scaffold805	175388	70	ULFQ01000715.1	79312	39
101047	OR13C2	HGNC:14701	CVI CM012323.1			Ambiguous: Colubroidea?				OR	ENSG00000276119	9	104604671							Scaffold3097	49129	124	CM012323.1	95944890	144	scaffold666	88986	129	ULFQ01000304.1	290707	115
101048	OR7G3	HGNC:8467	CVI CM012323.1			Ambiguous: Colubroidea?				OR	ENSG00000170920	19	9126012							Scaffold98	306783	105	CM012323.1	96034050	148	scaffold474	18829	124	ULFQ01000082.1	4791890	118
101049	OR9A4	HGNC:15095	CVI CM012323.1			Ambiguous: Colubroidea?				OR	ENSG00000258083	7	141916399							Scaffold5699	68486	115	CM012323.1	96041455	117	scaffold785	676246	108	ULFQ01000265.1	492303	113
101050	OR13C8	HGNC:15103	CVI CM012323.1			Ambiguous: Colubroidea?				OR	ENSG00000186943	9	104569168							Scaffold3097	39084	131	CM012323.1	96057982	148	scaffold666	5822	137	ULFQ01000304.1	553328	120
101051	OR10A5	HGNC:15131	CVI CM012323.1			Ambiguous: Colubroidea?				OR	ENSG00000166363	11	6845652							Scaffold989	6937	196	CM012323.1	96057994	192	scaffold1904	91680	170	ULFQ01000258.1	73619	134
101052	OR3A1	HGNC:8282	CVI CM012323.1			Ambiguous: Colubroidea?				OR	ENSG00000180090	17	3291017							Scaffold793	5326	121	CM012323.1	96057997	144	scaffold666	5840	130	ULFQ01000304.1	394785	130
101053	OR10A2	HGNC:8161	CVI CM012323.1			Ambiguous: Colubroidea?				OR	ENSG00000170790	11	6863057							Scaffold989	6937	197	CM012323.1	96058000	177	scaffold1904	91680	169	ULFQ01001387.1	9197	137
101054	OR10A4	HGNC:15130	CVI CM012323.1			Ambiguous: Colubroidea?				OR	ENSG00000170782	11	6876625							Scaffold989	6940	206	CM012323.1	96058003	187	scaffold1904	158141	183	ULFQ01000198.1	1297592	138
101055	OR2K2	HGNC:8264	CVI CM012323.1			Ambiguous: Colubroidea?				OR	ENSG00000171133	9	111327483							Scaffold3097	18704	130	CM012323.1	96058006	143	scaffold1904	20106	139	ULFQ01000304.1	312875	117
101056	OR10A6	HGNC:15132	CVI CM012323.1			Ambiguous: Colubroidea?				OR	ENSG00000279000	11	7924592				ENSACAG00000022197	GL343253.1	636431	Scaffold50022	29481	211	CM012323.1	96058012	156	scaffold666	151747	126	ULFQ01000304.1	339998	93
101057	OR5H6	HGNC:14767	CVI CM012323.1			Ambiguous: Colubroidea?				OR	ENSG00000230301	3	98263252							Scaffold3097	18734	104	CM012323.1	96058015	106	scaffold666	113716	121	ULFQ01000304.1	518994	120
101058	OR5V1	HGNC:13972	CVI CM012323.1			Ambiguous: Colubroidea?				OR	ENSG00000243729	6	29353749				ENSACAG00000011030	GL343253.1	632462	Scaffold50022	5637	250	CM012323.1	96078098	238	scaffold1904	138644	233	ULFQ01000666.1	115529	238
101059	OR13D1	HGNC:14695	CVI CM012323.1			Ambiguous: Colubroidea?				OR	ENSG00000179055	9	104694379							Scaffold3097	18716	156	CM012323.1	96078122	154	scaffold175	721154	138	ULFQ01000304.1	344865	125
101060	OR1N1	HGNC:8221	CVI CM012323.1			Ambiguous: Colubroidea?				OR	ENSG00000171505	9	122526358							Scaffold98	295991	146	CM012323.1	96091156	146	scaffold821	482758	148	ULFQ01000082.1	4772168	134
101061	ENSACAG00000022874	ENSEMBL:ENSACAG00000022874	CVI CM012323.1			Ambiguous: Colubroidea?				OR							ENSACAG00000022874	GL343253.1	623783	Scaffold8657	70134	151	CM012323.1	96091159	235	scaffold1904	69221	166	ULFQ01000666.1	105797	229
101062	OR10R2	HGNC:14820	CVI CM012323.1			Ambiguous: Colubroidea?				OR	ENSG00000198965	1	158472220							Scaffold791	1494537	122	CM012323.1	96100363	150	scaffold1401	160613	143	ULFQ01000497.1	97074	120
101063	OR2AT4	HGNC:19620	NSC ULFQ01000497.1			Ambiguous: Colubroidea?				OR				ENSGALG00000031739	17	982700				Scaffold4516	68736	131	CM012306.1	101066286	175	scaffold666	151885	115	ULFQ01000497.1	107650	119
101064	OR5V1	HGNC:13972	NSC ULFQ01039961.1			Ambiguous: Colubroidea?				OR							ENSACAG00000007816	GL343220.1	1618823	Scaffold12924	26819	249	CM012306.1	101315055	199	scaffold1061	94930	251	ULFQ01039961.1	1	233
101065	OR1D2	HGNC:8183	CVI CM012323.1			Ambiguous: Colubroidea?				OR	ENSG00000184166	17	3088484							Scaffold3097	109569	117	CM012323.1	96116097	118	scaffold821	474863	117	ULFQ01039961.1	34	109
101066	OR13C4	HGNC:14722	CVI CM012323.1			Ambiguous: Colubroidea?				OR	ENSG00000148136	9	104526253							Scaffold3097	39084	137	CM012323.1	96116100	151	scaffold875	144669	132	ULFQ01000304.1	290710	135
101067	OR10AD1	HGNC:14819	CVI CM012323.1			Ambiguous: Colubroidea?				OR	ENSG00000172640	12	48202083							Scaffold8657	3376	88	CM012323.1	96128452	122	scaffold1717	283347	111	ULFQ01000258.1	73622	94
101068	OR2T2	HGNC:14725	CVI CM012323.1			Ambiguous: Colubroidea?				OR	ENSG00000196240	1	248445512							Scaffold237	1004642	136	CM012323.1	96151942	141	scaffold666	5813	128	ULFQ01000205.1	1214417	103
101069	OR10J5	HGNC:14993	CVI CM012323.1			Ambiguous: Colubroidea?				OR	ENSG00000184155	1	159535078							Scaffold3389	303820	121	CM012323.1	96158698	137	scaffold1061	22328	130	ULFQ01000304.1	397440	133
101070	OR1J1	HGNC:8208	CVI CM012323.1			Ambiguous: Colubroidea?				OR	ENSG00000136834	9	122476958							Scaffold98	268392	151	CM012323.1	96163771	150	scaffold821	509893	144	ULFQ01000304.1	290695	143
101071	OR6T1	HGNC:14848	CVI CM012323.1			Ambiguous: Colubroidea?				OR	ENSG00000181499	11	123942785							Scaffold6238	59519	141	CM012323.1	96170623	165	scaffold1075	49000	151	ULFQ01000265.1	360767	119
101072	OR10H3	HGNC:8174	CVI CM012323.1			Ambiguous: Colubroidea?				OR	ENSG00000171936	19	15737985	ENSGALG00000031385	AADN04000541.1	280025	ENSACAG00000027280	GL343253.1	786061	Scaffold8051	14367	226	CM012323.1	96175300	191	scaffold875	112495	181	ULFQ01000666.1	12073	172
101073	OR2L13	HGNC:19578	CVI CM012323.1			Ambiguous: Colubroidea?				OR	ENSG00000196071	1	248095184							Scaffold3097	181905	109	CM012323.1	96182959	119	scaffold875	55993	109	ULFQ01000258.1	169357	90
101074	OR1L3	HGNC:8215	CVI CM012323.1			Ambiguous: Colubroidea?				OR	ENSG00000171481	9	122675036							Scaffold98	306783	148	CM012323.1	96189010	169	scaffold666	181619	153	ULFQ01000258.1	115919	142
101075	OR13A1	HGNC:14772	CVI CM012323.1			Ambiguous: Colubroidea?				OR	ENSG00000277495	CHR_HSCHR10_1_CTG2	45302654							Scaffold1880	59311	130	CM012323.1	96189706	164	scaffold1839	35649	123	ULFQ01000258.1	144034	130
101076	OR7D2	HGNC:8378	CVI CM012323.1			Ambiguous: Colubroidea?				OR	ENSG00000188000	19	9178979							Scaffold98	258199	151	CM012323.1	96200998	145	scaffold821	482737	144	ULFQ01000304.1	453593	128
101077	OR6Y1	HGNC:14823	CVI CM012323.1			Ambiguous: Colubroidea?				OR	ENSG00000197532	1	158544550							Scaffold793	49374	202	CM012323.1	96218225	215	scaffold875	318194	204	ULFQ01003594.1	9540	191
101078	OR2T29	HGNC:31253	CVI CM012323.1			Ambiguous: Colubroidea?				OR	ENSG00000182783	1	248556912							Scaffold3097	109563	105	CM012323.1	96218330	148	scaffold225	8158	105	ULFQ01000258.1	144037	107
101079	OR2T10	HGNC:19573	CVI CM012323.1			Ambiguous: Colubroidea?				OR	ENSG00000184022	1	248590487							Scaffold237	1014705	121	CM012323.1	96218351	142	scaffold175	1111389	137	ULFQ01007293.1	507	114
101080	OR7A10	HGNC:8356	CVI CM012323.1			Ambiguous: Colubroidea?				OR	ENSG00000127515	19	14840466							Scaffold3097	109566	137	CM012323.1	96223468	157	scaffold666	197241	130	ULFQ01000304.1	290710	129
101081	OR6B2	HGNC:15041	CVI CM012323.1			Ambiguous: Colubroidea?				OR	ENSG00000182083	2	240028965	ENSGALG00000032196	10	698949	ENSACAG00000026694	GL343253.1	663313	Scaffold793	12289	259	CM012323.1	96227850	215	scaffold875	348408	210	ULFQ01001960.1	2333	210
101082	OR6B2	HGNC:15041	CVI CM012323.1			Ambiguous: Colubroidea?				OR	ENSG00000182083	2	240028965	ENSGALG00000032971	10	727056	ENSACAG00000024486	GL343253.1	670958	Scaffold793	12301	230	CM012323.1	96229753	242	scaffold875	348387	247	ULFQ01001960.1	2345	244
101083	OR6A2	HGNC:15301	CVI CM012323.1			Ambiguous: Colubroidea?				OR	ENSG00000184933	11	6791736							Scaffold793	49365	208	CM012323.1	96229759	165	scaffold875	257762	165	ULFQ01004954.1	3136	151
101084	OR6B2	HGNC:15041	CVI CM012323.1			Ambiguous: Colubroidea?				OR	ENSG00000182083	2	240028965	ENSGALG00000032196	10	698949	ENSACAG00000025689	GL343253.1	706790	Scaffold793	90350	189	CM012323.1	96229762	181	scaffold875	348408	185	ULFQ01001960.1	2354	183
101085	OR10AG1	HGNC:19607	Published as candidate W-linked	Vicoso_et_al_2013a:Dataset_S1(ENSACAG00000024396)	ZW Pair?	Ambiguous: Colubroidea?			yes	OR	ENSG00000174970	11	55965755				ENSACAG00000024396	GL343253.1	693240	Scaffold20974	5	208	CM012323.1	96240559	221	scaffold875	300763	227	ULFQ01001960.1	9502	210
101086	OR11A1	HGNC:8176	CVI CM012323.1			Ambiguous: Colubroidea?				OR	ENSG00000204694	6	29425504							Scaffold4544	9781	113	CM012323.1	96240580	121	scaffold474	33667	115	ULFQ01000258.1	73613	99
101087	OR9A2	HGNC:15093	CVI CM012323.1			Ambiguous: Colubroidea?				OR	ENSG00000179468	7	143026158							Scaffold5699	57135	99	CM012323.1	96240637	109	scaffold1904	34887	102	ULFQ01002739.1	4741	92
101088	ENSACAG00000027815	ENSEMBL:ENSACAG00000027815	CVI CM012323.1			Ambiguous: Colubroidea?				OR							ENSACAG00000027815	GL343253.1	575896	Scaffold4516	106258	208	CM012323.1	96263310	168	scaffold474	54915	152	ULFQ01000304.1	443905	130
101089	OR10K1	HGNC:14693	CVI CM012323.1			Ambiguous: Colubroidea?				OR	ENSG00000173285	1	158461574							Scaffold793	55060	138	CM012323.1	96268860	151	scaffold666	160012	163	ULFQ01000304.1	359462	121
101090	LOC100555088	NCBI:100555088	CVI CM012323.1			Ambiguous: Colubroidea?				OR							ENSACAG00000022388	GL343253.1	718673	Scaffold793	70762	224	CM012323.1	96274198	215	scaffold875	312417	211	ULFQ01003594.1	1963	204
101091	ENSACAG00000010863	ENSEMBL:ENSACAG00000010863	CVI CM012323.1			Ambiguous: Colubroidea?				OR							ENSACAG00000010863	GL343253.1	726033	Scaffold793	77341	228	CM012323.1	96286452	229	scaffold875	312426	216	ULFQ01003594.1	1966	214
101092	LOC100555287	NCBI:100555287	CVI CM012323.1			Ambiguous: Colubroidea?				OR							ENSACAG00000022303	GL343253.1	734235	Scaffold793	77353	175	CM012323.1	96292204	249	scaffold875	68437	207	ULFQ01000304.1	290710	164
101093	OR13C9	HGNC:15104	CVI CM012323.1			Ambiguous: Colubroidea?				OR	ENSG00000136839	9	104617248							Scaffold3097	18719	147	CM012323.1	96300681	160	scaffold666	88986	133	ULFQ01000258.1	73622	130
101094	OR1L6	HGNC:8218	CVI CM012323.1			Ambiguous: Colubroidea?				OR	ENSG00000171459	9	122742303							Scaffold98	306783	141	CM012323.1	96300684	154	scaffold1365	19773	143	ULFQ01000082.1	4772189	152
101095	OR2V1	HGNC:8280	CVI CM012323.1			Ambiguous: Colubroidea?				OR	ENSG00000185372	5	181123122							Scaffold3097	49120	116	CM012323.1	96300687	128	scaffold175	1111371	141	ULFQ01000304.1	290695	125
101096	OR2T6	HGNC:15018	CVI CM012323.1			Ambiguous: Colubroidea?				OR	ENSG00000198104	1	248375746							Scaffold3097	139386	123	CM012323.1	96300690	122	scaffold175	1111389	117	ULFQ01000304.1	564253	112
101097	OR2L5	HGNC:15011	CVI CM012323.1			Ambiguous: Colubroidea?				OR	ENSG00000197454	1	248013660							Scaffold3097	109569	122	CM012323.1	96300693	136	scaffold777	12349	126	ULFQ01000304.1	330465	123
101098	OR12D3	HGNC:13963	CVI CM012323.1			Ambiguous: Colubroidea?				OR	ENSG00000112462	6	29373423							Scaffold5811	5082	184	CM012323.1	96304700	181	scaffold875	169337	170	ULFQ01000676.1	89307	170
101099	OR12D2	HGNC:8178	CVI CM012323.1			Ambiguous: Colubroidea?				OR	ENSG00000280236	6	29395631	ENSGALG00000044048	10	735712				Scaffold15710	48274	163	CM012323.1	96368107	177	scaffold875	169340	183	ULFQ01000676.1	89385	159
101100	OR12D1	HGNC:8177	CVI CM012323.1			Ambiguous: Colubroidea?				OR	ENSG00000251608	6	29414928	ENSGALG00000044048	10	735712				Scaffold15710	48274	163	CM012323.1	96368116	159	scaffold875	218511	160	ULFQ01000676.1	89442	157
101101	OR12D1	HGNC:8177	CVI CM012323.1			Ambiguous: Colubroidea?				OR	ENSG00000251608	6	29414928	ENSGALG00000042358	10	705757				Scaffold793	119834	194	CM012323.1	96368125	194	scaffold875	169340	198	ULFQ01000676.1	12567	177
101102	OR6F1	HGNC:15027	CVI CM012323.1			Ambiguous: Colubroidea?				OR							ENSACAG00000027182	GL343253.1	748402	Scaffold793	97946	258	CM012323.1	96374131	145	scaffold875	22646	127	ULFQ01000304.1	248339	126
101103	OR1S1	HGNC:8227	CVI CM012323.1			Ambiguous: Colubroidea?				OR	ENSG00000280204	11	58212720							Scaffold4976	34502	129	CM012323.1	96417405	158	scaffold666	26819	132	ULFQ01000666.1	446	136
101104	OR1N2	HGNC:15111	CVI CM012323.1			Ambiguous: Colubroidea?				OR	ENSG00000171501	9	122553112							Scaffold3097	18716	128	CM012323.1	96426637	149	scaffold666	26822	141	ULFQ01000304.1	453578	126
101105	OR1L4	HGNC:8216	CVI CM012323.1			Ambiguous: Colubroidea?				OR	ENSG00000136939	9	122723990							Scaffold98	306783	155	CM012323.1	96451349	153	scaffold1365	19773	151	ULFQ01000304.1	359453	153
101106	OR2T34	HGNC:31256	CVI CM012323.1			Ambiguous: Colubroidea?				OR	ENSG00000183310	1	248573801							Scaffold3097	49126	102	CM012323.1	96497642	125	scaffold175	1111374	110	ULFQ01000258.1	115928	90
101107	OR5F1	HGNC:8343	CVI CM012323.1			Ambiguous: Colubroidea?				OR							ENSACAG00000023399	GL343253.1	1121925	Scaffold3097	109569	158	CM012323.1	96504375	170	scaffold67	924909	217	ULFQ01000497.1	6346	167
101108	OR14A16	HGNC:15022	CVI CM012323.1			Ambiguous: Colubroidea?				OR							ENSACAG00000022282	GL343253.1	961360	Scaffold18879	53970	202	CM012323.1	96588881	207	scaffold1744	29063	204	ULFQ01000380.1	69528	197
101109	OR6F1	HGNC:15027	CVI CM012323.1			Ambiguous: Colubroidea?				OR	ENSG00000169214	1	247711436				ENSACAG00000026704	GL343253.1	807515	Scaffold4976	144410	219	CM012323.1	96590462	224	scaffold875	611	225	ULFQ01002979.1	12552	221
101110	OR13A1	HGNC:14772	CVI CM012323.1			Ambiguous: Colubroidea?				OR	ENSG00000256574	10	45302298				ENSACAG00000025014	GL343253.1	821724	Scaffold4976	34472	223	CM012323.1	96656991	221	scaffold1479	34784	222	ULFQ01000258.1	115922	223
101111	OR2V2	HGNC:15341	CVI CM012323.1			Ambiguous: Colubroidea?				OR	ENSG00000182613	5	181147586							Scaffold3097	49120	115	CM012323.1	96656994	135	scaffold175	1111371	127	ULFQ01000304.1	290695	122
101112	OR2A14	HGNC:15084	CVI CM012323.1			Ambiguous: Colubroidea?				OR	ENSG00000221938	7	144123176							Scaffold3097	18722	126	CM012323.1	96656997	142	scaffold666	26972	122	ULFQ01007293.1	519	139
101113	OR2A12	HGNC:15082	NSC ULFQ01007293.1			Ambiguous: Colubroidea?				OR	ENSG00000221858	7	144086278							Scaffold3097	18719	158	CM012306.1	101145513	148	scaffold666	96826	141	ULFQ01007293.1	519	139
101114	OR10H3	HGNC:8174	CVI CM012323.1			Ambiguous: Colubroidea?				OR	ENSG00000171936	19	15737985	ENSGALG00000031385	AADN04000541.1	280025				Scaffold18879	6714	98	CM012323.1	96662066	112	scaffold1744	54098	106	ULFQ01000380.1	86824	99
101115	OR10C1	HGNC:8165	CVI CM012323.1			Ambiguous: Colubroidea?				OR	ENSG00000235441	CHR_HSCHR6_MHC_SSTO_CTG1	29439782							Scaffold4516	34606	171	CM012323.1	96691471	165	scaffold1061	37830	147	ULFQ01000258.1	115931	132
101116	OR13A1	HGNC:14772	CVI CM012323.1			Ambiguous: Colubroidea?				OR	ENSG00000256574	10	45302298				ENSACAG00000022018	GL343253.1	830394	Scaffold1880	100810	219	CM012323.1	96704885	220	scaffold1839	53897	223	ULFQ01000258.1	169201	216
101117	OR13G1	HGNC:14999	CVI CM012323.1			Ambiguous: Colubroidea?				OR	ENSG00000197437	1	247670812				ENSACAG00000026552	GL343220.1	1599493	Scaffold1880	59236	199	CM012323.1	96704897	202	scaffold1839	35574	200	ULFQ01026169.1	411	189
101118	OR56B4	HGNC:15248	CVI CM012323.1			Ambiguous: Colubroidea?				OR	ENSG00000180919	11	6107684							Scaffold33159	2409	65	CM012323.1	96749721	75	scaffold920	236251	44	ULFQ01000211.1	1054469	59
101119	OR14A16	HGNC:15022	CVI CM012323.1			Ambiguous: Colubroidea?				OR	ENSG00000196772	1	247814660							Scaffold1217	8059	119	CM012323.1	96810165	131	scaffold1043	152669	108	ULFQ01000258.1	631870	111
101120	ENSACAG00000027635	ENSEMBL:ENSACAG00000027635	CVI CM012323.1			Ambiguous: Colubroidea?				OR							ENSACAG00000027635	GL343253.1	878210	Scaffold8657	92354	228	CM012323.1	96851126	229	scaffold1713	52104	227	ULFQ01000258.1	363829	228
101121	OR2D2	HGNC:8244	CVI CM012323.1			Ambiguous: Colubroidea?				OR	ENSG00000166368	11	6891490							Scaffold50022	22513	133	CM012323.1	96865994	155	scaffold474	33565	133	ULFQ01000258.1	487512	139
101122	OR2AE1	HGNC:15087	CVI CM012323.1			Ambiguous: Colubroidea?				OR	ENSG00000244623	7	99875987							Scaffold3097	57667	94	CM012323.1	96926342	105	scaffold666	203965	81	ULFQ01000258.1	471834	96
101123	OR14K1	HGNC:15025	CVI CM012323.1			Ambiguous: Colubroidea?				OR	ENSG00000153230	1	247738615							Scaffold793	49503	73	CM012323.1	96937454	123	scaffold8075	1698	96	ULFQ01000380.1	97980	81
101124	OR5V1	HGNC:13972	CVI CM012323.1			Ambiguous: Colubroidea?				OR	ENSG00000243729	6	29353749				ENSACAG00000010890	GL343253.1	891485	Scaffold8657	3235	245	CM012323.1	96945635	241	scaffold1075	140848	244	ULFQ01000258.1	515049	250
101125	OR11L1	HGNC:14998	CVI CM012323.1			Ambiguous: Colubroidea?				OR	ENSG00000197591	1	247840928				ENSACAG00000010907	GL343253.1	900322	Scaffold6238	21355	237	CM012323.1	96960077	231	scaffold1075	123334	231	ULFQ01000258.1	523611	231
101126	OR4D6	HGNC:15175	CVI CM012323.1			Ambiguous: Colubroidea?				OR	ENSG00000166884	11	59456938							Scaffold6238	74465	137	CM012323.1	96998683	134	scaffold1075	24763	118	ULFQ01000304.1	248339	111
101127	OR6M1	HGNC:14711	CVI CM012323.1			Ambiguous: Colubroidea?				OR				ENSGALG00000037290	AADN04002906.1	9307				Scaffold4818	63029	113	CM012323.1	96998704	147	scaffold875	49848	129	ULFQ01000265.1	618610	112
101128	OR14A2	HGNC:15024	CVI CM012323.1			Ambiguous: Colubroidea?				OR	ENSG00000241128	1	247722957							Scaffold12798	46846	110	CM012323.1	96998707	131	scaffold1043	88637	124	ULFQ01000380.1	99912	123
101129	OR4D1	HGNC:8293	CVI CM012323.1			Ambiguous: Colubroidea?				OR							ENSACAG00000010915	GL343253.1	906794	Scaffold6238	69746	231	CM012323.1	97026655	232	scaffold1075	69071	235	ULFQ01000442.1	239072	81
101130	OR4M2	HGNC:15373	NSC ULFQ01000442.1			Ambiguous: Colubroidea?				OR	ENSG00000274102	15	22070241				ENSACAG00000008714	GL343220.1	935728	Scaffold15251	617	258	CM012309.1	85905479	266	scaffold920	236146	266	ULFQ01000442.1	249527	247
101131	OR4M2	HGNC:15373	NSC ULFQ01000442.1			Ambiguous: Colubroidea?				OR	ENSG00000274102	15	22070241				ENSACAG00000024442	GL343220.1	928034	Scaffold15251	644	211	CM012309.1	85905503	210	scaffold920	236173	212	ULFQ01000442.1	249548	203
101132	OR4D5	HGNC:14852	NSC ULFQ01000442.1			Ambiguous: Colubroidea?				OR	ENSG00000171014	11	123939543							Scaffold15251	8127	160	CM012309.1	85897372	174	scaffold920	244088	171	ULFQ01000442.1	259327	172
101133	OR4D1	HGNC:8293	CVI CM012323.1			Ambiguous: Colubroidea?				OR	ENSG00000141194	17	58148449							Scaffold6238	63355	166	CM012323.1	97026664	166	scaffold1075	69098	165	ULFQ01000442.1	259324	143
101134	OR4D11	HGNC:15174	NSC ULFQ01000442.1			Ambiguous: Colubroidea?				OR	ENSG00000176200	11	59503576							Scaffold6238	4327	146	CM012309.1	85897381	149	scaffold506	747484	134	ULFQ01000442.1	259342	149
101135	OR4D9	HGNC:15178	CVI CM012323.1			Ambiguous: Colubroidea?				OR							ENSACAG00000022276	GL343253.1	913291	Scaffold6238	74456	215	CM012323.1	97026697	176	scaffold1075	69080	177	ULFQ01000304.1	255750	118
101136	OR56B1	HGNC:15245	CVI CM012323.1			Ambiguous: Colubroidea?				OR	ENSG00000181023	11	5736448							Scaffold33159	2406	76	CM012323.1	97050784	75	scaffold805	26655	79	ULFQ01000258.1	515235	47
101137	OR14C36	HGNC:15026	CVI CM012323.1			Ambiguous: Colubroidea?				OR	ENSG00000177174	1	248348775	ENSGALG00000035443	AADN04001168.1	29464				Scaffold12798	46822	118	CM012323.1	97062789	165	scaffold1043	22178	142	ULFQ01000258.1	648358	141
101138	OR14I1	HGNC:19575	CVI CM012323.1			Ambiguous: Colubroidea?				OR	ENSG00000189181	1	248681369							Scaffold18879	82012	138	CM012323.1	97087116	149	scaffold1043	88628	134	ULFQ01000380.1	95459	133
101139	LOC100559209	NCBI:100559209	CVI CM012323.1			Ambiguous: Colubroidea?				OR				ENSGALG00000029798	KQ759404.1	348927	ENSACAG00000010919	GL343253.1	923649	Scaffold6856	11728	201	CM012323.1	97100231	203	scaffold1043	4980	205	ULFQ01000258.1	631867	204
101140	OR2T33	HGNC:31255	CVI CM012323.1			Ambiguous: Colubroidea?				OR	ENSG00000177212	1	248269917							Scaffold4516	72647	125	CM012323.1	97191798	131	scaffold175	1111407	105	ULFQ01000205.1	331032	104
101141	LOC100559410	NCBI:100559410	Published as candidate W-linked	Vicoso_et_al_2013a:Dataset_S1(ENSACAG00000010930)	ZW Pair?	Ambiguous: Colubroidea?			yes	VMN2R26							ENSACAG00000010930	GL343253.1	927463	Scaffold6053	12405	368	CM012323.1	97207596	394	scaffold1043	160881	405	ULFQ01000958.1	29394	318
101142	OR14I1	HGNC:19575	CVI CM012323.1			Ambiguous: Colubroidea?				OR							ENSACAG00000010942	GL343253.1	989123	Scaffold18879	94451	205	CM012323.1	97243612	201	scaffold2165	2767	189	ULFQ01000380.1	99882	184
101143	OR14J1	HGNC:13971	CVI CM012323.1			Ambiguous: Colubroidea?				OR	ENSG00000204695	6	29301701							Scaffold12798	46852	101	CM012323.1	97243618	150	scaffold67	811463	113	ULFQ01000380.1	116514	115
101144	OR7G2	HGNC:8466	CVI CM012323.1			Ambiguous: Colubroidea?				OR	ENSG00000170923	19	9100407							Scaffold98	268392	102	CM012323.1	97287403	128	scaffold666	160030	128	ULFQ01000082.1	4258871	110
101145	ENSACAG00000024155	ENSEMBL:ENSACAG00000024155	CVI CM012323.1			Ambiguous: Colubroidea?				OR							ENSACAG00000024155	GL343253.1	1048593	Scaffold18879	6390	142	CM012323.1	97341814	155	scaffold1744	22275	156	ULFQ01000380.1	149965	151
101146	OR14A16	HGNC:15022	CVI CM012323.1			Ambiguous: Colubroidea?				OR							ENSACAG00000010940	GL343253.1	967592	Scaffold18879	94445	247	CM012323.1	97431976	221	scaffold1744	29063	221	ULFQ01000380.1	57000	210
101147	OR14C36	HGNC:15026	CVI CM012323.1			Ambiguous: Colubroidea?				OR							ENSACAG00000022589	AAWZ02039468	1655	Scaffold18879	82012	184	CM012323.1	97438693	186	scaffold1744	22275	187	ULFQ01000380.1	149845	168
101148	ENSACAG00000024209	ENSEMBL:ENSACAG00000024209	CVI CM012323.1			Ambiguous: Colubroidea?				OR							ENSACAG00000024209	AAWZ02039902	189	Scaffold18879	82012	173	CM012323.1	97439185	182	scaffold1744	22275	173	ULFQ01000380.1	144044	179
101149	OR14A16	HGNC:15022	CVI CM012323.1			Ambiguous: Colubroidea?				OR							ENSACAG00000010938	GL343253.1	954381	Scaffold18879	53976	197	CM012323.1	97465926	199	scaffold2165	2782	196	ULFQ01000380.1	60626	201
101150	OR14A16	HGNC:15022	CVI CM012323.1			Ambiguous: Colubroidea?				OR							ENSACAG00000026301	GL343253.1	1027497	Scaffold18879	25248	172	CM012323.1	97629491	233	scaffold2251	46370	235	ULFQ01000380.1	234736	225
101151	LOC100563162	NCBI:100563162	CVI CM012323.1			Ambiguous: Colubroidea?				OR							ENSACAG00000010971	GL343253.1	1104105	Scaffold8657	47442	146	CM012323.1	97824467	228	scaffold67	957029	232	ULFQ01000497.1	115268	236
101152	ENSACAG00000010983	ENSEMBL:ENSACAG00000010983	CVI CM012323.1			Ambiguous: Colubroidea?				OR							ENSACAG00000010983	GL343253.1	1127466	Scaffold25825	14798	223	CM012323.1	97847352	213	scaffold67	939185	220	ULFQ01000497.1	97071	223
101153	OR14A2	HGNC:15024	CVI CM012323.1			Ambiguous: Colubroidea?				OR	ENSG00000239395	1	247711813							Scaffold5861	19726	25	CM012323.1	97924198	24	scaffold67	756739	25	ULFQ01000380.1	184315	23
101154	SBK2	HGNC:34416	CVI CM012323.1			Ambiguous: Colubroidea?					ENSG00000187550	19	55529733	ENSGALG00000013035	2	78614461	ENSACAG00000011002	GL343253.1	1238570	Scaffold5861	102333	277	CM012323.1	98053388	269	scaffold67	638552	270	ULFQ01000222.1	194309	271
101155	SBK3	HGNC:44121	CVI CM012323.1			Ambiguous: Colubroidea?					ENSG00000231274	19	55540656	ENSGALG00000045933	LGE64	768363	ENSACAG00000029080	GL343253.1	1279998	Scaffold5861	154510	285	CM012323.1	98089986	281	scaffold67	125460	294	ULFQ01000222.1	244174	270
101156	SSC5D	HGNC:26641	CVI CM012323.1			Ambiguous: Colubroidea?					ENSG00000179954	19	55488404							Scaffold5861	72686	249	CM012323.1	98128126	229	scaffold67	430664	268	ULFQ01000222.1	290470	283
101157	DMBT1	HGNC:2926	CVI CM012323.1			Ambiguous: Colubroidea?					ENSG00000187908	10	122560665				ENSACAG00000010950	GL343619.1	122304	Scaffold5861	202934	402	CM012323.1	98128210	447	scaffold307	6769066	375	ULFQ01000222.1	290557	400
101158	TNXB	HGNC:11976	CVI CM012323.1			Ambiguous: Colubroidea?								ENSGALG00000033314	19	197111	ENSACAG00000003896	1	85431840	Scaffold5861	318831	76	CM012323.1	98130507	69	scaffold67	438532	67	ULFQ01000001.1	3401817	69
101159	SCART1	HGNC:32411	CVI CM012323.1			Ambiguous: Colubroidea?					ENSG00000214279	10	133453928							Scaffold5861	202847	146	CM012323.1	98130591	147	scaffold307	6769123	163	ULFQ01000222.1	418675	136
101160	CD5L	HGNC:1690	CVI CM012323.1			Ambiguous: Colubroidea?					ENSG00000073754	1	157830914							Scaffold5861	205372	86	CM012323.1	98130723	81	scaffold307	6823229	81	ULFQ01000001.1	3297900	89
101161	NAT14	HGNC:28918	NSC ULFQ01000222.1			Ambiguous: Colubroidea?					ENSG00000090971	19	55485004							Scaffold5861	219563	50				scaffold67	543584	50	ULFQ01000222.1	313758	50
101162	ZNF628	HGNC:28054	CVI CM012323.1			Ambiguous: Colubroidea?					ENSG00000197483	19	55476332	ENSGALG00000044788	LGE64	793673	ENSACAG00000011023	GL343253.1	1357918	Scaffold5861	229088	839	CM012323.1	98154215	814	scaffold67	201555	796	ULFQ01000222.1	320973	806
101163	SBK1	HGNC:17699	CVI CM012323.1			Ambiguous: Colubroidea?											ENSACAG00000026234	GL343253.1	1378943	Scaffold5861	251862	276	CM012323.1	98174019	270	scaffold67	509053	268	ULFQ01000222.1	347391	273
101164	ZSCAN31	HGNC:14097	CVI CM012323.1			Ambiguous: Colubroidea?											ENSACAG00000011044	GL343253.1	1406205	Scaffold5861	282902	336	CM012323.1	98195281	305	scaffold67	461149	302	ULFQ01000108.1	560008	281
101165	DMBT1	HGNC:2926	CVI CM012323.1			Ambiguous: Colubroidea?								ENSGALG00000044326	LGE64	638465	ENSACAG00000023029	GL343253.1	1419716	Scaffold5861	310405	746	CM012323.1	98221895	740	scaffold67	430661	738	ULFQ01000222.1	414872	736
101166	VWA5A	HGNC:6658	CVI CM012323.1			Ambiguous: Colubroidea?					ENSG00000110002	11	124115362	ENSGALG00000028815	24	6257931	ENSACAG00000007863	GL343253.1	1791011	Scaffold3443	87428	240	CM012323.1	98316117	238	scaffold67	314679	322	ULFQ01000222.1	851296	335
101167	ZNF397	HGNC:18818	CVI CM012323.1			Ambiguous: Colubroidea?											ENSACAG00000004271	GL344026.1	72446	Scaffold2907	146722	65	CM012323.1	98343865	64	scaffold67	302019	64	ULFQ01000222.1	515600	63
101168	ZSCAN16	HGNC:20813	CVI CM012323.1			Ambiguous: Colubroidea?											ENSACAG00000022389	GL343253.1	1511803	Scaffold3443	109600	185	CM012323.1	98343889	182	scaffold67	299950	181	ULFQ01000222.1	515624	182
101169	ZSWIM9	HGNC:34495	NSC ULFQ01000222.1			Ambiguous: Colubroidea?					ENSG00000185453	19	48170692				ENSACAG00000025946	GL343253.1	1523640	Scaffold3443	125212	436							ULFQ01000222.1	529522	167
101170	LIG1	HGNC:6598	CVI CM012323.1			Ambiguous: Colubroidea?					ENSG00000105486	19	48115445	ENSGALG00000043938	LGE64	799440	ENSACAG00000011085	GL343253.1	1532059	Scaffold3443	135319	593	CM012323.1	98382851	564	scaffold67	261911	560	ULFQ01000222.1	545374	564
101171	ATF5	HGNC:790	CVI CM012323.1			Ambiguous: Colubroidea?					ENSG00000169136	19	49928702				ENSACAG00000024934	GL343253.1	1553826	Scaffold3443	151892	212	CM012323.1	98393842	208	scaffold67	259765	207	ULFQ01000222.1	563589	207
101172	ARHGEF40	HGNC:25516	CVI CM012323.1			Ambiguous: Colubroidea?					ENSG00000165801	14	21070270				ENSACAG00000011378	GL343253.1	1599940	Scaffold3443	205646	889	CM012323.1	98455920	902	scaffold67	162535	923	ULFQ01000222.1	625722	919
101173	ZNF219	HGNC:13011	CVI CM012323.1			Ambiguous: Colubroidea?					ENSG00000165804	14	21090046				ENSACAG00000020984	GL343253.1	1662626	Scaffold3443	247994	549	CM012323.1	98502832	522	scaffold67	133601	527	ULFQ01000222.1	673261	534
101174	TPPP2	HGNC:19293	CVI CM012323.1			Ambiguous: Colubroidea?					ENSG00000179636	14	21024109	ENSGALG00000015213	Z	44121835	ENSACAG00000011386	GL343253.1	1695209	Scaffold3443	289311	134	CM012323.1	98556289	137	scaffold67	96885	137	ULFQ01000222.1	734808	133
101175	NDRG2	HGNC:14460	CVI CM012323.1			Ambiguous: Colubroidea?					ENSG00000165795	14	21016763				ENSACAG00000011415	GL343253.1	1707154	Scaffold3443	302904	343	CM012323.1	98580615	327	scaffold67	49181	343	ULFQ01000222.1	757813	337
101176	PRSS21	HGNC:9485	CVI CM012323.1			Ambiguous: Colubroidea?				PRSS	ENSG00000007038	16	2817180				ENSACAG00000007928	GL343253.1	1843088	Scaffold3443	417655	207	CM012323.1	98699314	197	scaffold929	100877	183	ULFQ01000222.1	907682	202
101177	TPSG1	HGNC:14134	CVI CM012323.1			Ambiguous: Colubroidea?					ENSG00000116176	16	1221651							Scaffold108	217954	88	CM012323.1	98699353	109	scaffold1099	28106	87	ULFQ01000092.1	4072086	87
101178	PRSS41	HGNC:30715	CVI CM012323.1			Ambiguous: Colubroidea?				PRSS	ENSG00000215148	16	2798485							Scaffold108	121536	59	CM012323.1	98699383	66	scaffold130	3043926	58	ULFQ01000007.1	10756425	55
101179	ENSACAG00000010874	ENSEMBL:ENSACAG00000010874	CVI CM012323.1			Ambiguous: Colubroidea?				VMN2R26							ENSACAG00000010874	GL343253.1	774372	Scaffold26724	12717	237	CM012323.1	98756625	277	scaffold1099	139436	261	ULFQ01000706.1	44819	214
101180	ENSACAG00000005533	ENSEMBL:ENSACAG00000005533	CVI CM012323.1			Ambiguous: Colubroidea?				VMN2R26							ENSACAG00000005533	GL343514.1	273203	Scaffold3752	461646	234	CM012323.1	98769558	243	scaffold1131	116161	244	ULFQ01000758.1	21757	211
101181	LOC103279793	NCBI:103279793	Published as candidate W-linked	Vicoso_et_al_2013a:Dataset_S1(ENSACAG00000010956)	ZW Pair?	Ambiguous: Colubroidea?		yes		VMN2R26							ENSACAG00000010956	GL343253.1	1089509	Scaffold915	1470	532	CM012323.1	98928780	469	scaffold67	966170	460	ULFQ01000492.1	79973	320
101182	ENSACAG00000024824	ENSEMBL:ENSACAG00000024824	CVI CM012323.1			Ambiguous: Colubroidea?				VMN2R26							ENSACAG00000024824	GL343253.1	1930638	Scaffold5627	3325	351	CM012323.1	99002953	484	scaffold391	101300	428	ULFQ01000492.1	32514	335
101183	ENSACAG00000022902	ENSEMBL:ENSACAG00000022902	CVI CM012323.1			Ambiguous: Colubroidea?				VMN2R26							ENSACAG00000022902	GL343253.1	1963671	Scaffold5627	10238	376	CM012323.1	99038983	418	scaffold1227	27060	401	ULFQ01001013.1	33693	369
101184	ENSACAG00000007113	ENSEMBL:ENSACAG00000007113	Published as candidate W-linked	Vicoso_et_al_2013a:Dataset_S1(ENSACAG00000007113)	ZW Pair?	Ambiguous: Colubroidea?		yes		VMN2R26							ENSACAG00000007113	GL343287.1	1748238	Scaffold4812	3911	414	CM012323.1	99089611	452	scaffold391	101315	428	ULFQ01000554.1	91699	447
101185	ENSACAG00000004377	ENSEMBL:ENSACAG00000004377	CVI CM012323.1			Ambiguous: Colubroidea?				VMN2R26							ENSACAG00000004377	GL344165.1	51456	Scaffold15979	26836	108	CM012323.1	99147036	147	scaffold1099	233726	127	ULFQ01000701.1	24551	115
101186	PRSS22	HGNC:14368	CVI CM012323.1			Ambiguous: Colubroidea?				PRSS	ENSG00000005001	16	2852727							Scaffold2380	62710	72	CM012323.1	99672382	55	scaffold929	312376	52	ULFQ01000092.1	3936114	55
101187	PRSS33	HGNC:30405	CVI CM012323.1			Ambiguous: Colubroidea?				PRSS	ENSG00000103355	16	2783953							Scaffold108	67378	76	CM012323.1	99672391	64	W_scaffold3016	12389	72	ULFQ01000007.1	10756416	65
101188	PRSS21	HGNC:9485	CVI CM012323.1			Ambiguous: Colubroidea?				PRSS	ENSG00000007038	16	2817180				ENSACAG00000025507	GL343287.1	1697243	Scaffold2380	62731	166	CM012323.1	99672394	112	scaffold929	312346	98	ULFQ01000092.1	3936120	107
101189	PRSS27	HGNC:15475	CVI CM012323.1			Ambiguous: Colubroidea?				PRSS	ENSG00000172382	16	2712418				ENSACAG00000007026	GL343287.1	1650442	Scaffold108	55905	88	CM012323.1	99672394	97	scaffold1099	116217	91	ULFQ01000092.1	3936090	99
101190	RNF112	HGNC:12968	CVI CM012323.1			Ambiguous: Colubroidea?					ENSG00000128482	17	19411125				ENSACAG00000007106	GL343287.1	1724210	Scaffold2380	85645	307	CM012323.1	99696017	215	scaffold732	65449	237	ULFQ01000494.1	67609	196
101191	MFAP4	HGNC:7035	CVI CM012323.1			Ambiguous: Colubroidea?					ENSG00000166482	17	19383442				ENSACAG00000007087	GL343287.1	1707797	Scaffold2380	115421	225	CM012323.1	99722193	207	W_scaffold4541	2385	222	ULFQ01000494.1	95354	221
101192	PRSS42P	HGNC:30716	CVI CM012323.1			Ambiguous: Colubroidea?				PRSS	ENSG00000178055	3	46829542							Scaffold108	159795	62	CM012323.1	99995648	62	scaffold1099	28163	55	ULFQ01000092.1	3982567	53
101193	PRSS44P	HGNC:37324	CVI CM012323.1			Ambiguous: Colubroidea?				PRSS							ENSACAG00000006985	GL343287.1	1541510	Scaffold108	67378	378	CM012323.1	99995648	335	scaffold1099	28106	293	ULFQ01000092.1	3982510	339
101194	PRSS33	HGNC:30405	CVI CM012323.1			Ambiguous: Colubroidea?				PRSS							ENSACAG00000027327	GL343287.1	1596059	Scaffold108	77399	198	CM012323.1	100006403	188	scaffold1099	96482	201	ULFQ01000092.1	3872056	198
101195	PRSS36	HGNC:26906	CVI CM012323.1			Ambiguous: Colubroidea?				PRSS	ENSG00000178226	16	31138925							Scaffold3443	417694	66	CM012323.1	100084681	57	scaffold639	1844853	73	ULFQ01000198.1	677036	87
101196	PRSS8	HGNC:9491	CVI CM012323.1			Ambiguous: Colubroidea?				PRSS							ENSACAG00000028847	GL343287.1	1517504	Scaffold1945	634220	46	CM012323.1	100158621	55	scaffold463	10229	57	ULFQ01000092.1	3939683	58
101197	PRSS21	HGNC:9485	CVI CM012323.1			Ambiguous: Colubroidea?				PRSS	ENSG00000007038	16	2817180				ENSACAG00000006964	GL343287.1	1470248	Scaffold108	159771	131	CM012323.1	100158630	131	scaffold463	10232	147	ULFQ01000092.1	3936087	126
101198	ELOB	HGNC:11619	CVI CM012323.1			Ambiguous: Colubroidea?					ENSG00000103363	16	2771414				ENSACAG00000006958	GL343287.1	1437653	Scaffold108	240087	111	CM012323.1	100176219	112	scaffold463	23561	112	ULFQ01000533.1	12452	113
101199	SRRM2	HGNC:16639	Published as candidate W-linked	Vicoso_et_al_2013a:Dataset_S1(ENSACAG00000006912)	ZW Pair	Crotalus-Sisturus-Protobothrops;Colubridae-Elapidae			yes		ENSG00000114745	3	39096659	ENSGALG00000006033	2	5304377	ENSACAG00000009518	6	356053	Scaffold1468	1034582	245	CM012323.1	3339535	224	scaffold619	1972080	222	ULFQ01000110.1	1142466	224
101200	CLDN4	HGNC:2046	CVI CM012323.1			Crotalus-Sisturus-Protobothrops;Colubridae-Elapidae											ENSACAG00000006908	GL343287.1	1340428	Scaffold108	328846	185	CM012323.1	100297584	177	W_scaffold2757	1730	180	ULFQ01000092.1	3812441	184
101201	CLDN9	HGNC:2051	CVI CM012323.1			Crotalus-Sisturus-Protobothrops;Colubridae-Elapidae					ENSG00000213937	16	3012456	ENSGALG00000035131	19	672604	ENSACAG00000021080	GL343287.1	1328263	Scaffold108	343975	192	CM012323.1	100311773	189	scaffold463	154300	189	ULFQ01000092.1	3796291	190
101202	CLDN6	HGNC:2048	CVI CM012323.1			Crotalus-Sisturus-Protobothrops;Colubridae-Elapidae					ENSG00000184697	16	3014712							Scaffold108	328918	120	CM012323.1	100311869	122	W_scaffold2757	1784	119	ULFQ01000092.1	3796360	123
101203	PKMYT1	HGNC:29650	CVI CM012323.1			Crotalus-Sisturus-Protobothrops;Colubridae-Elapidae					ENSG00000127564	16	2968024				ENSACAG00000006893	GL343287.1	1241740	Scaffold2907	43293	355	CM012323.1	100395053	383	scaffold463	244459	403	ULFQ01000092.1	3694613	347
101204	PAQR4	HGNC:26386	CVI CM012323.1			Crotalus-Sisturus-Protobothrops;Colubridae-Elapidae					ENSG00000162073	16	2969245				ENSACAG00000006882	GL343287.1	1210691	Scaffold2907	53232	243	CM012323.1	100405844	243	scaffold463	254411	238	ULFQ01000092.1	3674173	243
101205	KREMEN2	HGNC:18797	CVI CM012323.1			Crotalus-Sisturus-Protobothrops;Colubridae-Elapidae					ENSG00000131650	16	2963944				ENSACAG00000006862	GL343287.1	1160107	Scaffold2907	79768	416	CM012323.1	100416323	412	scaffold463	278607	413	ULFQ01000092.1	3638111	398
101206	ZNF444	HGNC:16052	CVI CM012323.1			Crotalus-Sisturus-Protobothrops;Colubridae-Elapidae					ENSG00000167685	19	56132599				ENSACAG00000006825	GL343287.1	1069366	Scaffold2907	146680	521	CM012323.1	100504729	512	scaffold1070	497006	295	ULFQ01000092.1	3499877	505
101207	ZSCAN18	HGNC:21037	CVI CM012323.1			Crotalus-Sisturus-Protobothrops;Colubridae-Elapidae					ENSG00000121413	19	58083838							Scaffold2907	146791	52	CM012323.1	100542110	46	scaffold131	1890658	44	ULFQ01000344.1	222878	39
101208	SGF29	HGNC:25156	CVI CM012323.1			Crotalus-Sisturus-Protobothrops;Colubridae-Elapidae					ENSG00000176476	16	28553915	ENSGALG00000020590	8	29925894	ENSACAG00000006595	GL343287.1	1017241	Scaffold2907	233410	290	CM012323.1	100578676	290	scaffold1070	433513	290	ULFQ01000092.1	3414576	240
101209	SULT1E1	HGNC:11377	CVI CM012323.1			Crotalus-Sisturus-Protobothrops;Colubridae-Elapidae								ENSGALG00000011812	4	52140111	ENSACAG00000006642	GL343287.1	1045659	Scaffold1500	464689	130	CM012323.1	100586616	164	scaffold1070	452000	215	ULFQ01000092.1	3440714	161
101210	NUPR1	HGNC:29990	NSC ULFQ01000092.1			Crotalus-Sisturus-Protobothrops;Colubridae-Elapidae					ENSG00000176046	16	28532708							Scaffold2907	253092	28				scaffold1070	420237	27	ULFQ01000092.1	3395478	27
101211	LOC100567541	NCBI:100567541	CVI CM012323.1			Crotalus-Sisturus-Protobothrops;Colubridae-Elapidae											ENSACAG00000028632	GL343287.1	991635	Scaffold2907	255952	396	CM012323.1	100629578	394	scaffold1070	409196	381	ULFQ01000092.1	3383307	377
101212	SULT1C4	HGNC:11457	CVI CM012323.1			Crotalus-Sisturus-Protobothrops;Colubridae-Elapidae					ENSG00000198075	2	108377911				ENSACAG00000006355	GL343287.1	878648	Scaffold2907	273369	204	CM012323.1	100639735	170	scaffold1070	263463	190	ULFQ01000092.1	3308847	154
101213	SULT1B1	HGNC:17845	CVI CM012323.1			Crotalus-Sisturus-Protobothrops;Colubridae-Elapidae											ENSACAG00000025639	GL343287.1	813742	Scaffold2907	326131	233	CM012323.1	100729974	231	scaffold1070	226146	234	ULFQ01000092.1	3237710	191
101214	PITPNA	HGNC:9001	CVI CM012323.1			Crotalus-Sisturus-Protobothrops;Colubridae-Elapidae					ENSG00000174238	17	1517718	ENSGALG00000035005	19	5289861	ENSACAG00000006142	GL343287.1	796973	Scaffold2907	344149	254	CM012323.1	100751157	248	scaffold1070	213478	249	ULFQ01000092.1	3219426	247
101215	CLN3	HGNC:2074	CVI CM012323.1			Crotalus-Sisturus-Protobothrops;Colubridae-Elapidae					ENSG00000188603	16	28474111				ENSACAG00000006069	GL343287.1	735505	Scaffold2907	402405	322	CM012323.1	100806574	332	scaffold1070	148891	306	ULFQ01000092.1	3158157	302
101216	EIF3C	HGNC:3279	CVI CM012323.1			Crotalus-Sisturus-Protobothrops;Colubridae-Elapidae					ENSG00000184110	16	28688558	ENSGALG00000043967	AADN04024620.1	874	ENSACAG00000005937	GL343287.1	713980	Scaffold2907	421057	869	CM012323.1	100828599	863	scaffold1070	119881	856	ULFQ01000092.1	3129083	856
101217	PRODH2	HGNC:17325	CVI CM012323.1			Crotalus-Sisturus-Protobothrops;Colubridae-Elapidae					ENSG00000250799	19	35799988	ENSGALG00000036223	KQ759627.1	466				Scaffold2907	446094	139	CM012323.1	100851956	107	scaffold1070	103933	126	ULFQ01000092.1	3111359	125
101218	CABP5	HGNC:13714	CVI CM012323.1			Crotalus-Sisturus-Protobothrops;Colubridae-Elapidae					ENSG00000105507	19	48029953				ENSACAG00000005858	GL343287.1	684630	Scaffold2907	462209	139	CM012323.1	100868705	129	scaffold1070	92385	128	ULFQ01000092.1	3100466	114
101219	ADPRHL	CGNC:52823	CVI CM012323.1			Crotalus-Sisturus-Protobothrops;Colubridae-Elapidae								ENSGALG00000031996	AADN04000923.1	18055	ENSACAG00000027873	GL343287.1	662714	Scaffold2907	488938	299	CM012323.1	100894931	298	scaffold1070	65688	298	ULFQ01000092.1	3070396	298
101220	SPNS1	HGNC:30621	NSC ULFQ01000092.1			Crotalus-Sisturus-Protobothrops;Colubridae-Elapidae					ENSG00000169682	16	28974221				ENSACAG00000005777	GL343287.1	620951	Scaffold2907	522159	439	CM012315.1	12926731	436	scaffold1070	24178	436	ULFQ01000092.1	3022217	431
101221	NFATC2IP	HGNC:25906	NSC ULFQ01000092.1			Crotalus-Sisturus-Protobothrops;Colubridae-Elapidae					ENSG00000176953	16	28950807				ENSACAG00000005762	GL343287.1	609573	Scaffold2907	533421	103	CM012315.1	12947919	95	scaffold1070	6267	92	ULFQ01000092.1	3017069	70
101222	CD19	HGNC:1633	CVI CM012323.1			Crotalus-Sisturus-Protobothrops;Colubridae-Elapidae											ENSACAG00000028673	GL343287.1	547531	Scaffold2907	560283	140	CM012323.1	100944348	81	scaffold505	2064939	108	ULFQ01000092.1	2918003	134
101223	ATP2A1	HGNC:811	CVI CM012323.1			Crotalus-Sisturus-Protobothrops;Colubridae-Elapidae					ENSG00000196296	16	28878405	ENSGALG00000034680	AADN04007447.1	1253	ENSACAG00000005552	GL343287.1	500894	Scaffold2907	596590	914	CM012323.1	100982881	903	scaffold505	2008431	916	ULFQ01000092.1	2875182	908
101224	SH2B1	HGNC:30417	CVI CM012323.1			Crotalus-Sisturus-Protobothrops;Colubridae-Elapidae					ENSG00000178188	16	28846600				ENSACAG00000005528	GL343287.1	437509	Scaffold2907	657100	571	CM012323.1	101057607	574	scaffold505	1955388	578	ULFQ01000092.1	2829441	568
101225	ATXN2L	HGNC:31326	CVI CM012323.1			Crotalus-Sisturus-Protobothrops;Colubridae-Elapidae					ENSG00000168488	16	28823035				ENSACAG00000005425	GL343287.1	403003	Scaffold2907	678979	873	CM012323.1	101079311	858	scaffold505	1923866	870	ULFQ01000092.1	2778463	854
101226	TUFM	HGNC:12420	CVI CM012323.1			Crotalus-Sisturus-Protobothrops;Colubridae-Elapidae					ENSG00000178952	16	28842411				ENSACAG00000005399	GL343287.1	394218	Scaffold2907	696057	361	CM012323.1	101096118	343	scaffold505	1918477	307	ULFQ01000092.1	2772581	314
101227	RABEP2	HGNC:24817	CVI CM012323.1			Crotalus-Sisturus-Protobothrops;Colubridae-Elapidae					ENSG00000177548	16	28904421				ENSACAG00000026973	GL343287.1	379300	Scaffold2907	707323	288	CM012323.1	101109231	220	scaffold505	1899139	267	ULFQ01000092.1	2748483	266
101228	ACP4	HGNC:14376	CVI CM012323.1			Crotalus-Sisturus-Protobothrops;Colubridae-Elapidae					ENSG00000142513	19	50790415				ENSACAG00000005243	GL343287.1	355559	Scaffold2907	736012	246	CM012323.1	101141684	149	scaffold505	1860869	227	ULFQ01000092.1	2710624	245
101229	LOC100563818	NCBI:100563818	CVI CM012323.1			Crotalus-Sisturus-Protobothrops;Colubridae-Elapidae											ENSACAG00000005181	GL343287.1	296824	Scaffold2907	773943	338	CM012323.1	101177589	360	scaffold505	1803064	358	ULFQ01000092.1	2637650	352
101230	NAPSA	HGNC:13395	CVI CM012323.1			Crotalus-Sisturus-Protobothrops;Colubridae-Elapidae					ENSG00000131400	19	50358477				ENSACAG00000005091	GL343287.1	260983	Scaffold2907	804347	240	CM012323.1	101218628	233	scaffold505	1761995	237	ULFQ01000092.1	2593837	239
101231	KCNC3	HGNC:6235	CVI CM012323.1			Crotalus-Sisturus-Protobothrops;Colubridae-Elapidae					ENSG00000131398	19	50311937				ENSACAG00000005085	GL343287.1	213314	Scaffold2907	835831	420	CM012306.1	88628769	371	scaffold505	1728506	407	ULFQ01000092.1	2549943	421
101232	TBC1D17	HGNC:25699	CVI CM012323.1			Crotalus-Sisturus-Protobothrops;Colubridae-Elapidae					ENSG00000104946	19	49877425				ENSACAG00000004969	GL343287.1	133654	Scaffold2907	912571	600	CM012323.1	101343284	589	scaffold505	1639814	599	ULFQ01000092.1	2471487	597
101233	AKT1S1	HGNC:28426	CVI CM012323.1			Crotalus-Sisturus-Protobothrops;Colubridae-Elapidae					ENSG00000204673	19	49869033				ENSACAG00000004956	AAWZ02036910	9590	Scaffold2907	932652	241	CM012323.1	101365237	238	scaffold505	1626515	237	ULFQ01000092.1	2454402	231
101234	TSPAN4	HGNC:11859	CVI CM012323.1			Crotalus-Sisturus-Protobothrops;Colubridae-Elapidae											ENSACAG00000004926	AAWZ02036910	2483	Scaffold2907	942801	216	CM012323.1	101377827	209	scaffold505	1609892	212	ULFQ01000092.1	2442663	210
101235	PRMT1	HGNC:5187	CVI CM012323.1			Crotalus-Sisturus-Protobothrops;Colubridae-Elapidae					ENSG00000126457	19	49675786				ENSACAG00000004864	GL343287.1	83111	Scaffold2907	965888	365	CM012323.1	101413785	354	scaffold505	1568266	365	ULFQ01000092.1	2403790	360
101236	GYS1	HGNC:4706	CVI CM012323.1			Crotalus-Sisturus-Protobothrops;Colubridae-Elapidae					ENSG00000104812	19	48968125				ENSACAG00000004713	GL343287.1	45277	Scaffold2907	988674	706	CM012323.1	101439497	707	scaffold505	1529582	707	ULFQ01000092.1	2348334	707
101237	FTL	HGNC:3999	CVI CM012323.1			Crotalus-Sisturus-Protobothrops;Colubridae-Elapidae					ENSG00000087086	19	48965301				ENSACAG00000029107	GL343287.1	38301	Scaffold2907	1020888	118	CM012323.1	101478549	116	scaffold505	1503847	116	ULFQ01000092.1	2318287	117
101238	FTH1	HGNC:3976	CVI CM012323.1			Crotalus-Sisturus-Protobothrops;Colubridae-Elapidae											ENSACAG00000004685	GL343287.1	15479	Scaffold2907	1037942	176	CM012323.1	101494892	159	scaffold505	1503634	174	ULFQ01000092.1	2318079	173
101239	BAX	HGNC:959	CVI CM012323.1			Crotalus-Sisturus-Protobothrops;Colubridae-Elapidae					ENSG00000087088	19	48954815				ENSACAG00000004652	GL343287.1	852	Scaffold2907	1060531	78	CM012323.1	101534220	77	scaffold505	1467962	77	ULFQ01000092.1	2280499	78
101240	SLC6A16	HGNC:13622	CVI CM012323.1			Crotalus-Sisturus-Protobothrops;Colubridae-Elapidae					ENSG00000063127	19	49289638				ENSACAG00000017478	GL343355.1	26562	Scaffold2907	1073714	408	CM012323.1	101584122	417	scaffold505	1432856	413	ULFQ01000021.1	999247	257
101241	CD37	HGNC:1666	CVI CM012323.1			Crotalus-Sisturus-Protobothrops;Colubridae-Elapidae					ENSG00000104894	19	49335171				ENSACAG00000017465	GL343355.1	68638	Scaffold2907	1112909	155	CM012323.1	101623998	124	scaffold505	1389951	149	ULFQ01000092.1	2188955	119
101242	TEAD2	HGNC:11715	CVI CM012323.1			Crotalus-Sisturus-Protobothrops;Colubridae-Elapidae					ENSG00000074219	19	49340595				ENSACAG00000017423	GL343355.1	98225	Scaffold2907	1127129	364	CM012323.1	101640461	353	scaffold505	1365888	352	ULFQ01000092.1	2140397	290
101243	KASH5	HGNC:26520	CVI CM012323.1			Crotalus-Sisturus-Protobothrops;Colubridae-Elapidae											ENSACAG00000017411	GL343355.1	145683	Scaffold2907	1171587	211	CM012323.1	101688011	175	scaffold505	1314320	168	ULFQ01000092.1	2112345	175
101244	KRAS	HGNC:6407	CVI CM012323.1			Crotalus-Sisturus-Protobothrops;Colubridae-Elapidae					ENSG00000133703	12	25204789	ENSGALG00000030943	1	67241669	ENSACAG00000017404	GL343355.1	167031	Scaffold569	2926152	185	CM012323.1	101722027	186	scaffold133	1614630	185	ULFQ01000099.1	3078778	186
101245	GAL	HGNC:4114	CVI CM012323.1			Crotalus-Sisturus-Protobothrops;Colubridae-Elapidae											ENSACAG00000029317	GL343355.1	184367	Scaffold2907	1215890	58	CM012323.1	101742203	41	scaffold505	1270029	61	ULFQ01000092.1	2021930	26
101246	PTH2	HGNC:30828	CVI CM012323.1			Crotalus-Sisturus-Protobothrops;Colubridae-Elapidae					ENSG00000142538	19	49422414				ENSACAG00000029530	GL343355.1	188533	Scaffold2907	1225341	45	CM012323.1	101755598	77	scaffold505	1263807	74	ULFQ01000092.1	2062391	75
101247	ALDH16A1	HGNC:28114	CVI CM012323.1			Crotalus-Sisturus-Protobothrops;Colubridae-Elapidae					ENSG00000161618	19	49453169				ENSACAG00000028856	GL343355.1	334941	Scaffold2907	1090884	685	CM012323.1	101853630	557	scaffold505	1129416	682	ULFQ01000092.1	1922080	635
101248	PIH1D1	HGNC:26075	CVI CM012323.1			Crotalus-Sisturus-Protobothrops;Colubridae-Elapidae					ENSG00000104872	19	49446298				ENSACAG00000017335	GL343355.1	375475	Scaffold2907	1346467	231	CM012323.1	101890861	226	scaffold505	1104410	208	ULFQ01000092.1	1902200	228
101249	SLC17A7	HGNC:16704	Published as candidate W-linked	Vicoso_et_al_2013a:Dataset_S1(ENSACAG00000017314)	ZW Pair	Crotalus-Sisturus-Protobothrops;Colubridae-Elapidae		yes			ENSG00000108106	19	55399745	ENSGALG00000036827	AADN04010802.1	1717	ENSACAG00000016005	GL343279.1	1385129	Scaffold6508	508753	207	CM012323.1	104345178	207	W_scaffold4738	9558	207	ULFQ01000175.1	690378	206
101250	RPL13A	HGNC:10304	NSC ULFQ01000092.1			Crotalus-Sisturus-Protobothrops;Ambiguous: Colubridae-Elapidae					ENSG00000142541	19	49487554				ENSACAG00000017279	GL343355.1	503203	Scaffold2907	1448353	191	CM012306.1	128042906	191	scaffold505	1008346	188	ULFQ01000092.1	1524695	188
101251	DHDH	HGNC:17887	CVI CM012323.1			Crotalus-Sisturus-Protobothrops;Ambiguous: Colubridae-Elapidae					ENSG00000104808	19	48933682	ENSGALG00000031013	AADN04000777.1	34106	ENSACAG00000017265	GL343355.1	512736	Scaffold2907	1455780	237	CM012323.1	102004762	244	scaffold505	992672	248	ULFQ01000092.1	1778817	248
101252	TULP2	HGNC:12424	CVI CM012323.1			Crotalus-Sisturus-Protobothrops;Ambiguous: Colubridae-Elapidae					ENSG00000104804	19	48880965				ENSACAG00000017252	GL343355.1	541082	Scaffold2907	1472027	395	CM012323.1	102035320	379	scaffold505	959463	371	ULFQ01000092.1	1751397	369
101253	NUCB1	HGNC:8043	CVI CM012323.1			Crotalus-Sisturus-Protobothrops;Ambiguous: Colubridae-Elapidae					ENSG00000104805	19	48900050				ENSACAG00000017223	GL343355.1	568953	Scaffold2907	1502231	381	CM012323.1	102070429	349	scaffold505	928720	365	ULFQ01000092.1	1717652	328
101254	BCAT2	HGNC:977	CVI CM012323.1			Crotalus-Sisturus-Protobothrops;Ambiguous: Colubridae-Elapidae					ENSG00000105552	19	48795062				ENSACAG00000017178	GL343355.1	794951	Scaffold2907	1541251	296	CM012323.1	102101656	294	scaffold505	776870	292	ULFQ01000092.1	1548611	292
101255	PLEKHA4	HGNC:14339	CVI CM012323.1			Crotalus-Sisturus-Protobothrops;Ambiguous: Colubridae-Elapidae					ENSG00000105559	19	48837097				ENSACAG00000029233	GL343355.1	616521	Scaffold2907	1570337	115	CM012323.1	102147099	115	scaffold505	860220	113	ULFQ01000092.1	1648504	117
101256	HSD17B14	HGNC:23238	CVI CM012323.1			Crotalus-Sisturus-Protobothrops;Ambiguous: Colubridae-Elapidae					ENSG00000087076	19	48813017				ENSACAG00000017205	GL343355.1	726203	Scaffold2907	1606210	137	CM012323.1	102184956	125	scaffold505	804702	121	ULFQ01000092.1	1580894	97
101257	FGF21	HGNC:3678	CVI CM012323.1			Crotalus-Sisturus-Protobothrops;Ambiguous: Colubridae-Elapidae					ENSG00000105550	19	48755559				ENSACAG00000017175	GL343355.1	839719	Scaffold2907	1669794	127	CM012323.1	102254834	117	scaffold505	743996	119	ULFQ01000092.1	1508646	125
101258	TNNI3	HGNC:11947	CVI CM012323.1			Crotalus-Sisturus-Protobothrops;Ambiguous: Colubridae-Elapidae					ENSG00000129991	19	55151767				ENSACAG00000017150	GL343355.1	850179	Scaffold2907	1677817	197	CM012323.1	102265535	185	scaffold505	730052	206	ULFQ01000092.1	1493655	188
101259	DNAAF3	HGNC:30492	CVI CM012323.1			Crotalus-Sisturus-Protobothrops;Ambiguous: Colubridae-Elapidae					ENSG00000167646	19	55158661				ENSACAG00000017144	GL343355.1	869426	Scaffold2907	1694537	321	CM012323.1	102286515	322	scaffold505	700862	298	ULFQ01000092.1	1467530	323
101260	TMEM86B	HGNC:28448	CVI CM012323.1			Crotalus-Sisturus-Protobothrops;Ambiguous: Colubridae-Elapidae					ENSG00000180089	19	55226639				ENSACAG00000017115	GL343355.1	1008291	Scaffold2907	1785777	113	CM012323.1	102305881	38	scaffold505	452882	37	ULFQ01000092.1	1358672	82
101261	SYT5	HGNC:11513	CVI CM012323.1			Crotalus-Sisturus-Protobothrops;Ambiguous: Colubridae-Elapidae					ENSG00000129990	19	55171199				ENSACAG00000017137	GL343355.1	896857	Scaffold2907	1716224	392	CM012323.1	102320909	385	scaffold505	682562	388	ULFQ01000092.1	1448803	390
101262	PTPRH	HGNC:9672	CVI CM012323.1			Crotalus-Sisturus-Protobothrops;Ambiguous: Colubridae-Elapidae					ENSG00000080031	19	55181248				ENSACAG00000017116	GL343355.1	954211	Scaffold2907	1754386	231	CM012323.1	102357202	252	scaffold505	622828	208	ULFQ01000092.1	1394647	222
101263	PPP6R1	HGNC:29195	Published as candidate W-linked	Vicoso_et_al_2013a:Dataset_S1(ENSACAG00000017059)	ZW Pair	Crotalus-Sisturus-Protobothrops;Colubridae		yes	yes		ENSG00000167978	16	2752329	ENSGALG00000041283	KQ759647.1	6531	ENSACAG00000006912	GL343287.1	1380876	Scaffold108	278178	1229	CM012323.1	100219243	1253	scaffold463	68745	1251	ULFQ01000092.1	3870109	1221
101264	HSPBP1	HGNC:24989	Published as candidate W-linked	Vicoso_et_al_2013a:Dataset_S1(ENSACAG00000017041)	ZW Pair	Crotalus-Sisturus-Protobothrops;Colubridae		yes			ENSG00000063177	19	48615328				ENSACAG00000015711	GL343279.1	944795	Scaffold6508	925478	181	CM012323.1	104843195	182	scaffold1636	383529	182	ULFQ01000175.1	1214537	180
101265	BRSK1	HGNC:18994	CVI CM012323.1			Crotalus-Sisturus-Protobothrops;Colubridae					ENSG00000160469	19	55282072				ENSACAG00000016990	GL343329.1	1286258	Scaffold2907	1898691	769	CM012323.1	102595600	643	scaffold505	410208	764	ULFQ01000092.1	1164612	765
101266	TMEM150B	HGNC:34415	CVI CM012323.1			Crotalus-Sisturus-Protobothrops;Colubridae					ENSG00000180061	19	55312801				ENSACAG00000028696	GL343329.1	1276642	Scaffold2907	1949403	174	CM012323.1	102646733	187	scaffold505	397872	165	ULFQ01000092.1	1150880	152
101267	KMT5C	HGNC:28405	CVI CM012323.1			Crotalus-Sisturus-Protobothrops;Colubridae					ENSG00000133247	19	55339853	ENSGALG00000030942	AADN04001595.1	13251	ENSACAG00000016974	GL343329.1	1248755	Scaffold2907	1980653	349	CM012323.1	102680809	311	scaffold505	348984	316	ULFQ01000092.1	1109918	343
101268	TARM1	HGNC:37250	DAC scaffold505			Crotalus-Sisturus-Protobothrops;Colubridae					ENSG00000248385	19	54069895				ENSACAG00000016968	GL343329.1	1197670							scaffold505	316212	39
101269	TTYH1	HGNC:13476	Published as candidate W-linked	Vicoso_et_al_2013a:Dataset_S1(ENSACAG00000016932)	ZW Pair	Crotalus-Sisturus-Protobothrops;Colubridae		yes			ENSG00000174938	16	29871159				ENSACAG00000014033	GL343279.1	427	Scaffold1856	527789	867	CM012323.1	105873134	849	scaffold639	216962	820	ULFQ01000174.1	973888	861
101270	LENG8	HGNC:15500	Published as candidate W-linked	Vicoso_et_al_2013a:Dataset_S1(ENSACAG00000016911)	ZW Pair	Crotalus-Sisturus-Protobothrops;Colubridae		yes			ENSG00000103510	16	31115754				ENSACAG00000006708	GL343220.1	2316255	Scaffold1856	1434816	420	CM012323.1	107155049	406	scaffold639	1385824	429	ULFQ01000198.1	472815	407
101271	LENG9	HGNC:16306	CVI CM012323.1			Crotalus-Sisturus-Protobothrops;Colubridae					ENSG00000275183	19	54461796	ENSGALG00000035846	AADN04000640.1	60922	ENSACAG00000016906	GL343329.1	1078998	Scaffold1519	122005	219	CM012323.1	102937465	220	scaffold505	89936	195	ULFQ01000092.1	828944	198
101272	CDC42EP5	HGNC:17408	CVI CM012323.1			Crotalus-Sisturus-Protobothrops;Colubridae					ENSG00000167617	19	54465026				ENSACAG00000021929	GL343329.1	1065568	Scaffold1519	135164	98	CM012323.1	102953389	95	scaffold505	74767	94	ULFQ01000092.1	807548	94
101273	EPS8L1	HGNC:21295	CVI CM012323.1			Crotalus-Sisturus-Protobothrops;Colubridae					ENSG00000131037	19	55072020				ENSACAG00000016875	GL343329.1	977912	Scaffold1519	166700	380	CM012323.1	102993871	266	scaffold505	7745	346	ULFQ01000092.1	729796	353
101274	PPP1R12C	HGNC:14947	CVI CM012323.1			Crotalus-Sisturus-Protobothrops;Colubridae					ENSG00000125503	19	55090913				ENSACAG00000016847	GL343329.1	922431	Scaffold1519	206504	709	CM012323.1	103042053	669	scaffold1120	28087	649	ULFQ01000092.1	658525	694
101275	TNNT1	HGNC:11948	CVI CM012323.1			Crotalus-Sisturus-Protobothrops;Colubridae					ENSG00000105048	19	55132794	ENSGALG00000029203	AADN04001595.1	13319	ENSACAG00000016780	GL343329.1	871072	Scaffold1519	245974	216	CM012323.1	103089091	217	scaffold1120	78524	219	ULFQ01000092.1	618770	215
101276	CYTH2	HGNC:9502	CVI CM012323.1			Crotalus-Sisturus-Protobothrops;Colubridae					ENSG00000105443	19	48469032				ENSACAG00000016682	GL343329.1	744887	Scaffold1519	372920	390	CM012323.1	103135710	394	scaffold1120	229931	389	ULFQ01000092.1	487801	389
101277	FUT1	HGNC:4012	CVI CM012323.1			Crotalus-Sisturus-Protobothrops;Colubridae					ENSG00000174951	19	48748011				ENSACAG00000016777	GL343329.1	853192	Scaffold10043	167	111	CM012323.1	103154168	220	scaffold1120	146983	217	ULFQ01000092.1	576974	219
101278	FUT2	HGNC:4013	CVI CM012323.1			Crotalus-Sisturus-Protobothrops;Colubridae					ENSG00000176920	19	48695971				ENSACAG00000016777	GL343329.1	853192	Scaffold10043	167	111	CM012323.1	103154168	220	scaffold1120	146983	217	ULFQ01000092.1	576974	219
101279	KCNJ14	HGNC:6260	CVI CM012323.1			Crotalus-Sisturus-Protobothrops;Colubridae					ENSG00000182324	19	48455509				ENSACAG00000016771	GL343329.1	775403	Scaffold1519	360045	315	CM012323.1	103238366	335	W_scaffold1422	11658	346	ULFQ01000092.1	517731	336
101280	TLR5	HGNC:11851	CVI CM012323.1			Crotalus-Sisturus-Protobothrops;Colubridae					ENSG00000187554	1	223109406				ENSACAG00000016646	GL343329.1	715435	Scaffold1519	405564	641	CM012323.1	103288807	587	scaffold1120	263628	618	ULFQ01000092.1	468523	616
101281	LMTK3	HGNC:19295	CVI CM012323.1			Crotalus-Sisturus-Protobothrops;Colubridae					ENSG00000142235	19	48485271				ENSACAG00000016576	GL343329.1	624001	Scaffold1519	452547	1179	CM012323.1	103359699	1168	scaffold1120	329243	1186	ULFQ01000092.1	363867	1172
101282	RPS9	HGNC:10442	CVI CM012323.1			Crotalus-Sisturus-Protobothrops;Colubridae					ENSG00000170889	19	54200742				ENSACAG00000016566	GL343329.1	607905	Scaffold1519	497370	193	CM012323.1	103408253	193	scaffold1120	379985	193	ULFQ01000659.1	76645	192
101283	SOCS3	HGNC:19391	CVI CM012323.1			Crotalus-Sisturus-Protobothrops;Colubridae											ENSACAG00000026324	GL343329.1	604631	Scaffold1519	502885	150	CM012323.1	103414394	149	scaffold1120	386177	148	ULFQ01000092.1	320816	150
101284	CACNG7	HGNC:13626	CVI CM012323.1			Crotalus-Sisturus-Protobothrops;Colubridae					ENSG00000105605	19	53909335	ENSGALG00000042886	AADN04008330.1	656	ENSACAG00000016542	GL343329.1	516840	Scaffold1519	553589	280	CM012323.1	103482559	280	scaffold1120	448235	280	ULFQ01000092.1	229805	280
101285	CACNG8	HGNC:13628	CVI CM012323.1			Crotalus-Sisturus-Protobothrops;Colubridae					ENSG00000142408	19	53963040				ENSACAG00000026958	GL343329.1	451186	Scaffold1519	604006	351	CM012323.1	103550065	353	scaffold1120	521422	351	ULFQ01000092.1	171059	351
101286	CACNG6	HGNC:13625	CVI CM012323.1			Crotalus-Sisturus-Protobothrops;Colubridae					ENSG00000130433	19	53992288				ENSACAG00000016522	GL343329.1	414067	Scaffold1519	627881	190	CM012323.1	103624525	189	scaffold1120	552816	186	ULFQ01000092.1	114503	192
101287	PRKCG	HGNC:9402	CVI CM012323.1			Crotalus-Sisturus-Protobothrops;Colubridae					ENSG00000126583	19	53879190				ENSACAG00000016368	GL343329.1	327164	Scaffold1519	674722	676	CM012323.1	103650087	675	scaffold1120	589497	681	ULFQ01000092.1	53458	684
101288	MYADM	HGNC:7544	CVI CM012323.1			Crotalus-Sisturus-Protobothrops;Colubridae					ENSG00000179820	19	53866223				ENSACAG00000016360	GL343329.1	280593	Scaffold1519	745752	215	CM012323.1	103721545	226	scaffold1120	718095	223	ULFQ01025813.1	456	229
101289	ODAD1	HGNC:26560	CVI CM012323.1			Crotalus-Sisturus-Protobothrops;Colubridae					ENSG00000105479	19	48296457				ENSACAG00000016357	GL343329.1	213732	Scaffold6508	5047	141	CM012323.1	103743502	174	scaffold1120	740825	96	ULFQ01000175.1	11283	113
101290	EMP3	HGNC:3335	CVI CM012323.1			Crotalus-Sisturus-Protobothrops;Colubridae					ENSG00000142227	19	48321509				ENSACAG00000016345	GL343329.1	180525	Scaffold6508	29181	128	CM012323.1	103778278	126	scaffold1120	789034	126	ULFQ01000175.1	49111	119
101291	TMEM143	HGNC:25603	CVI CM012323.1			Crotalus-Sisturus-Protobothrops;Colubridae					ENSG00000161558	19	48332356				ENSACAG00000016332	GL343329.1	161209	Scaffold6508	45060	321	CM012323.1	103793804	283	scaffold1120	803658	322	ULFQ01000175.1	65580	307
101292	SYNGR4	HGNC:11502	CVI CM012323.1			Crotalus-Sisturus-Protobothrops;Colubridae					ENSG00000105467	19	48364395				ENSACAG00000028372	GL343329.1	145517	Scaffold6508	64169	103	CM012323.1	103815190	99	scaffold1120	825513	99	ULFQ01000175.1	88790	101
101293	KDELR1	HGNC:6304	CVI CM012323.1			Crotalus-Sisturus-Protobothrops;Colubridae					ENSG00000105438	19	48382570				ENSACAG00000016326	GL343329.1	130748	Scaffold6508	84301	196	CM012323.1	103826407	195	scaffold1120	839790	196	ULFQ01000175.1	99715	193
101294	GRIN2D	HGNC:4588	CVI CM012323.1			Crotalus-Sisturus-Protobothrops;Colubridae					ENSG00000105464	19	48394875				ENSACAG00000016220	GL343279.1	1724800	Scaffold6508	132157	1190	CM012323.1	103887679	1192	scaffold1120	896314	1191	ULFQ01000175.1	167946	1191
101295	GRWD1	HGNC:21270	CVI CM012323.1			Crotalus-Sisturus-Protobothrops;Colubridae					ENSG00000105447	19	48445773				ENSACAG00000016193	GL343279.1	1651022	Scaffold6508	219393	378	CM012323.1	104019938	360	scaffold1120	1023533	360	ULFQ01000175.1	309592	345
101296	TSEN34	HGNC:15506	CVI CM012323.1			Crotalus-Sisturus-Protobothrops;Colubridae					ENSG00000170892	19	54189938				ENSACAG00000016189	GL343279.1	1639877	Scaffold6508	227106	208	CM012323.1	104026876	194	scaffold1120	1030282	195	ULFQ01000175.1	316599	163
101297	MBOAT7	HGNC:15505	CVI CM012323.1			Crotalus-Sisturus-Protobothrops;Colubridae					ENSG00000125505	19	54173412	ENSGALG00000030640	AADN04008708.1	818	ENSACAG00000016174	GL343279.1	1617918	Scaffold6508	235644	279	CM012323.1	104038249	252	scaffold1120	1039262	251	ULFQ01000175.1	325866	277
101298	TMC4	HGNC:22998	CVI CM012323.1			Crotalus-Sisturus-Protobothrops;Colubridae					ENSG00000167608	19	54160108				ENSACAG00000016143	GL343279.1	1594388	Scaffold6508	277075	459	CM012323.1	104099118	476	scaffold1120	963961	386	ULFQ01000175.1	384435	422
101299	LENG1	HGNC:15502	CVI CM012323.1			Crotalus-Sisturus-Protobothrops;Colubridae					ENSG00000105617	19	54155161				ENSACAG00000016130	GL343279.1	1588365	Scaffold6508	294126	187	CM012323.1	104116588	183	scaffold1120	1107499	181	ULFQ01000175.1	406668	80
101300	CNOT3	HGNC:7879	NSC ULFQ01000175.1			Crotalus-Sisturus-Protobothrops;Colubridae					ENSG00000088038	19	54137717				ENSACAG00000016085	GL343279.1	1557111	Scaffold6508	302319	693	CM012320.1	2678969	479	scaffold1120	1115469	694	ULFQ01000175.1	415614	693
101301	PRPF31	HGNC:15446	CVI CM012323.1			Crotalus-Sisturus-Protobothrops;Colubridae					ENSG00000105618	19	54115410	ENSGALG00000035427	AADN04020081.1	346	ENSACAG00000016061	GL343279.1	1542269	Scaffold6508	336360	489	CM012323.1	104145382	491	W_scaffold2747	8602	388	ULFQ01000175.1	466973	492
101302	TFPT	HGNC:13630	CVI CM012323.1			Crotalus-Sisturus-Protobothrops;Colubridae					ENSG00000105619	19	54107013	ENSGALG00000033069	AADN04009916.1	29	ENSACAG00000016045	GL343279.1	1538266	Scaffold6508	350877	187	CM012323.1	104159962	182	scaffold576	1800336	151	ULFQ01000175.1	483926	182
101303	NDUFA3	HGNC:7686	CVI CM012323.1			Crotalus-Sisturus-Protobothrops;Colubridae					ENSG00000170906	19	54102728				ENSACAG00000016034	GL343279.1	1534812	Scaffold6508	359516	23	CM012323.1	104168684	34	scaffold576	1792780	35	ULFQ01000175.1	498725	20
101304	FAM83E	HGNC:25972	CVI CM012323.1			Crotalus-Sisturus-Protobothrops;Colubridae					ENSG00000105523	19	48600810				ENSACAG00000016022	GL343279.1	1479429	Scaffold6508	399782	277	CM012323.1	104213763	295	scaffold576	1719659	281	ULFQ01007696.1	1019	149
101305	SPACA4	HGNC:16441	CVI CM012323.1			Crotalus-Sisturus-Protobothrops;Colubridae					ENSG00000177202	19	48606743										CM012323.1	104229596	48				ULFQ01000175.1	576890	51
101306	SHISA7	HGNC:35409	CVI CM012323.1			Crotalus-Sisturus-Protobothrops;Colubridae					ENSG00000187902	19	55428740				ENSACAG00000016011	GL343279.1	1415278	Scaffold6508	463857	464	CM012323.1	104290916	464	scaffold576	1638236	463	ULFQ01000175.1	639110	467
101307	UBE2S	HGNC:17895	Published as candidate W-linked	Vicoso_et_al_2013a:Dataset_S1(ENSACAG00000016005); W-linked in DAC?	ZW Pair	Crotalus-Sisturus-Protobothrops;Colubridae			yes		ENSG00000105993	7	157335381	ENSGALG00000006477	2	8685144	ENSACAG00000011443	6	6546721	Scaffold1630	2356975	299	CM012323.1	7523336	297	scaffold849	1895541	296	ULFQ01000143.1	1111082	295
101308	RCVRN	HGNC:9937	CVI CM012323.1			Crotalus-Sisturus-Protobothrops;Colubridae					ENSG00000109047	17	9896320	ENSGALG00000043398	AADN04010802.1	511	ENSACAG00000015987	GL343279.1	1369085	Scaffold6508	508933	179	CM012323.1	104363175	144	scaffold576	1582273	164	ULFQ01000468.1	111685	163
101309	RPL28	HGNC:10330	CVI CM012323.1			Crotalus-Sisturus-Protobothrops;Colubridae					ENSG00000108107	19	55385345	ENSGALG00000031038	AADN04013100.1	3297	ENSACAG00000015980	GL343279.1	1340204	Scaffold6508	551642	133	CM012323.1	104395076	134	scaffold576	1550085	134	ULFQ01000175.1	749914	133
101310	GSG1	HGNC:19716	CVI CM012323.1			Crotalus-Sisturus-Protobothrops;Colubridae											ENSACAG00000015970	GL343279.1	1304214	Scaffold6508	570646	283	CM012323.1	104408973	269	scaffold576	1525547	272	ULFQ01000175.1	776132	268
101311	IL11	HGNC:5966	CVI CM012323.1			Crotalus-Sisturus-Protobothrops;Colubridae					ENSG00000095752	19	55364389				ENSACAG00000015945	GL343279.1	1293779	Scaffold6508	587929	150	CM012323.1	104432507	108	scaffold576	1512052	108	ULFQ01000175.1	796683	112
101312	TMEM238	HGNC:40042	CVI CM012323.1			Crotalus-Sisturus-Protobothrops;Colubridae					ENSG00000233493	19	55379245							Scaffold6508	681323	69	CM012323.1	104530502	67	scaffold576	1303545	75	ULFQ01000175.1	891112	75
101313	SPAG9	HGNC:14524	CVI CM012323.1			Crotalus-Sisturus-Protobothrops;Colubridae											ENSACAG00000028515	GL343279.1	1183989	Scaffold6508	688218	692	CM012323.1	104548234	556	scaffold576	1366966	623	ULFQ01000175.1	899243	627
101314	FAM71E2	HGNC:25278	NSC ULFQ01000175.1			Crotalus-Sisturus-Protobothrops;Colubridae					ENSG00000180043	19	55354908							Scaffold736	329448	23							ULFQ01000175.1	941258	30
101315	COX6B2	HGNC:24380	CVI CM012323.1			Crotalus-Sisturus-Protobothrops;Colubridae					ENSG00000160471	19	55349306										CM012323.1	104605637	19	scaffold576	1338245	19
101316	RASIP1	HGNC:24716	Published as candidate W-linked	Vicoso_et_al_2013a:Dataset_S1(ENSACAG00000015896)	ZW Pair	Crotalus-Sisturus-Protobothrops;Colubridae		yes			ENSG00000103507	16	31106107				ENSACAG00000006961	GL343220.1	2194689	Scaffold1856	1685244	386	CM012323.1	107257841	228	scaffold639	1749566	385	ULFQ01000198.1	593254	385
101317	MRTFA	HGNC:14334	CVI CM012323.1			Crotalus-Sisturus-Protobothrops;Colubridae											ENSACAG00000026043	GL343279.1	1116031	Scaffold6508	779417	251	CM012323.1	104649487	243	scaffold576	1269243	250	ULFQ01000175.1	890745	247
101318	MAMSTR	HGNC:26689	CVI CM012323.1			Crotalus-Sisturus-Protobothrops;Colubridae					ENSG00000176909	19	48712742							Scaffold263	76042	71	CM012323.1	104669576	34	W_scaffold2929	10438	45	ULFQ01000175.1	890472	48
101319	NTN5	HGNC:25208	CVI CM012323.1			Crotalus-Sisturus-Protobothrops;Colubridae					ENSG00000142233	19	48661407				ENSACAG00000015858	GL343279.1	1053114	Scaffold6508	851205	466	CM012323.1	104745822	462	scaffold1794	63362	458	ULFQ01000175.1	1103451	436
101320	SULT2B1	HGNC:11459	CVI CM012323.1			Crotalus-Sisturus-Protobothrops;Colubridae					ENSG00000088002	19	48552075	ENSGALG00000045487	LGE64	622456	ENSACAG00000011292	GL343253.1	1572552	Scaffold3443	181198	215	CM012323.1	104764515	149	scaffold1794	6956	110	ULFQ01007386.1	767	75
101321	CA11	HGNC:1370	CVI CM012323.1			Crotalus-Sisturus-Protobothrops;Colubridae					ENSG00000063180	19	48637942				ENSACAG00000015821	GL343279.1	1013841	Scaffold6508	880974	283	CM012323.1	104780775	280	scaffold1794	27283	279	ULFQ01000175.1	1144028	281
101322	SULT2B1	HGNC:11459	CVI CM012323.1			Crotalus-Sisturus-Protobothrops;Colubridae					ENSG00000088002	19	48552075				ENSACAG00000015735	GL343279.1	995519	Scaffold6508	898137	255	CM012323.1	104801680	245	scaffold1794	6944	255	ULFQ01007386.1	767	215
101323	SPHK2	HGNC:18859	CVI CM012323.1			Crotalus-Sisturus-Protobothrops;Colubridae					ENSG00000063176	19	48619291				ENSACAG00000015681	GL343279.1	921436	Scaffold6508	941044	477	CM012323.1	104824485	477	scaffold1636	341431	478	ULFQ01000175.1	1223491	468
101324	RPL18	HGNC:10310	Published as candidate W-linked	Vicoso_et_al_2013a:Dataset_S1(ENSACAG00000015711)	ZW Pair	Crotalus-Sisturus-Protobothrops;Colubridae			yes		ENSG00000170759	10	32009010	ENSGALG00000007215	2	14204995	ENSACAG00000007071	6	12561846	Scaffold1329	2570309	941	CM012323.1	14906621	923	scaffold1734	10349	832	ULFQ01000043.1	2979880	927
101325	DBP	HGNC:2697	CVI CM012323.1			Ambiguous:Crotalus-Sisturus-Protobothrops;Colubridae					ENSG00000105516	19	48630030				ENSACAG00000015667	GL343279.1	887480	Scaffold6508	973941	240	CM012323.1	104910072	241	scaffold1636	309146	241	ULFQ01000175.1	1279769	241
101326	ISOC2	HGNC:26278	CVI CM012323.1			Ambiguous:Crotalus-Sisturus-Protobothrops;Colubridae					ENSG00000063241	19	55452985				ENSACAG00000015636	GL343279.1	868033	Scaffold6508	996894	183	CM012323.1	104937017	182	scaffold1636	291298	181	ULFQ01000175.1	1304520	181
101327	MYH14	HGNC:23212	CVI CM012323.1			Ambiguous:Crotalus-Sisturus-Protobothrops;Colubridae					ENSG00000105357	19	50188186				ENSACAG00000015586	GL343279.1	786081	Scaffold6508	1010895	1908	CM012323.1	104952971	1895	scaffold1636	222208	1895	ULFQ01000175.1	1324514	1887
101328	IZUMO2	HGNC:28518	CVI CM012323.1			Ambiguous:Crotalus-Sisturus-Protobothrops;Colubridae											ENSACAG00000025465	GL343279.1	765616	Scaffold6508	1078965	86	CM012323.1	105041567	64	scaffold1636	187463	28	ULFQ01000175.1	1415805	49
101329	TBRG1	HGNC:29551	CVI CM012323.1			Ambiguous:Crotalus-Sisturus-Protobothrops;Colubridae					ENSG00000154144	11	124622836				ENSACAG00000027804	GL343279.1	488926	Scaffold1856	119117	250	CM012323.1	105064607	252	W_scaffold9476	2084	239	ULFQ01000174.1	1598673	241
101330	EPN1	HGNC:21604	CVI CM012323.1			Ambiguous:Crotalus-Sisturus-Protobothrops;Colubridae					ENSG00000063245	19	55675226				ENSACAG00000015534	GL343279.1	720273	Scaffold6508	1106030	563	CM012323.1	105076690	551	scaffold1636	134323	553	ULFQ01000175.1	1450299	550
101331	U2AF2	HGNC:23156	CVI CM012323.1			Ambiguous:Crotalus-Sisturus-Protobothrops;Colubridae					ENSG00000063244	19	55654146				ENSACAG00000015489	GL343279.1	695345	Scaffold6508	1143870	468	CM012323.1	105113388	468	scaffold1636	99231	468	ULFQ01000175.1	1498381	459
101332	CCDC106	HGNC:30181	CVI CM012323.1			Ambiguous:Crotalus-Sisturus-Protobothrops;Colubridae					ENSG00000173581	19	55641062				ENSACAG00000015482	GL343279.1	685692	Scaffold6508	1166504	245	CM012323.1	105134434	210	scaffold1636	90178	212	ULFQ01004299.1	3195	236
101333	ZNF784	HGNC:33111	CVI CM012323.1			Ambiguous:Crotalus-Sisturus-Protobothrops;Colubridae				ZNF	ENSG00000179922	19	55620742				ENSACAG00000015243	GL343279.1	660127	Scaffold6508	1194581	264	CM012323.1	105165593	269	scaffold1636	56159	272	ULFQ01000175.1	1546969	267
101334	ZNF865	HGNC:38705	CVI CM012323.1			Ambiguous:Crotalus-Sisturus-Protobothrops;Colubridae				ZNF	ENSG00000261221	19	55605405	ENSGALG00000042792	KQ759663.1	4808	ENSACAG00000024666	GL343279.1	637229	Scaffold6508	1211949	573	CM012323.1	105185849	572	scaffold1636	44922	567	ULFQ01000359.1	22673	580
101335	ZNF580	HGNC:29473	NSC ULFQ01000175.1			Ambiguous:Crotalus-Sisturus-Protobothrops;Colubridae				ZNF	ENSG00000213015	19	55635016							Scaffold6508	1194632	23				scaffold1636	69980	23	ULFQ01000175.1	1547020	23
101336	ZNF581	HGNC:25017	CVI CM012323.1			Ambiguous:Crotalus-Sisturus-Protobothrops;Colubridae				ZNF	ENSG00000171425	19	55635459				ENSACAG00000029472	GL343279.1	624270	Scaffold1856	6812	295	CM012323.1	105206568	250	scaffold1636	27025	297	ULFQ01000175.1	1589193	287
101337	ZNF524	HGNC:28322	CVI CM012323.1			Ambiguous:Crotalus-Sisturus-Protobothrops;Colubridae				ZNF	ENSG00000171443	19	55600022							Scaffold684	32120	81	CM012323.1	105206844	78	scaffold1636	27547	78	ULFQ01000175.1	1589469	78
101338	SACS	HGNC:10519	CVI CM012323.1			Ambiguous:Crotalus-Sisturus-Protobothrops;Colubridae											ENSACAG00000025054	GL343279.1	588938	Scaffold1856	26448	2427	CM012323.1	105246698	2220	scaffold2633	54005	1874	ULFQ01002025.1	1	1866
101339	C19orf85	HGNC:53653	CVI CM012323.1			Ambiguous:Crotalus-Sisturus-Protobothrops;Colubridae					ENSG00000283567	19	55463002										CM012323.1	105288898	29
101340	LOC100558292	NCBI:100558292	CVI CM012323.1			Ambiguous:Crotalus-Sisturus-Protobothrops;Colubridae											ENSACAG00000015475	GL343279.1	541498	Scaffold657	796067	91	CM012323.1	105326795	104	scaffold2633	32059	97	ULFQ01000174.1	1660109	107
101341	FIZ1	HGNC:25917	CVI CM012323.1			Ambiguous:Crotalus-Sisturus-Protobothrops;Colubridae					ENSG00000179943	19	55591371				ENSACAG00000026810	GL343279.1	562763	Scaffold1856	53648	249	CM012323.1	105344233	316	scaffold2633	47331	247	ULFQ01000174.1	1676655	248
101342	ENSACAG00000015471	ENSEMBL:ENSACAG00000015471	CVI CM012323.1			Ambiguous:Crotalus-Sisturus-Protobothrops;Colubridae											ENSACAG00000015471	GL343279.1	511798	Scaffold1856	99815	268	CM012323.1	105369829	267	scaffold3099	3817	269	ULFQ01000174.1	1618236	267
101343	ZNF91	HGNC:13166	BCO Scaffold1856			Ambiguous:Crotalus-Sisturus-Protobothrops;Colubridae				ZNF							ENSACAG00000015467	GL343279.1	499081	Scaffold1856	111169	433	CM012307.1	88279	226	scaffold47	249115	223	ULFQ01000619.1	36382	218
101344	TACO1	HGNC:24316	CVI CM012323.1			Ambiguous:Crotalus-Sisturus-Protobothrops;Colubridae					ENSG00000136463	17	63600872				ENSACAG00000015463	GL343279.1	481916	Scaffold1856	123497	93	CM012323.1	105395984	70	scaffold3099	26005	108	ULFQ01000174.1	1582882	79
101345	ENSACAG00000026969	ENSEMBL:ENSACAG00000026969	CVI CM012323.1			Ambiguous:Crotalus-Sisturus-Protobothrops;Colubridae				ZNF							ENSACAG00000026969	GL343532.1	227929	Scaffold3397	54616	202	CM012323.1	105413876	197	scaffold736	619821	191	ULFQ01000279.1	142420	206
101346	ZNF18	HGNC:12969	CVI CM012323.1			Ambiguous:Crotalus-Sisturus-Protobothrops;Colubridae				ZNF	ENSG00000154957	17	11977439							Scaffold1856	139131	139	CM012323.1	105413891	150	scaffold740	182612	132	ULFQ01000587.1	26603	129
101347	ZNF397	HGNC:18818	CVI CM012323.1			Ambiguous:Crotalus-Sisturus-Protobothrops;Colubridae				ZNF	ENSG00000186812	18	35241030							Scaffold5314	18290	203	CM012323.1	105413891	232	scaffold343	86607	223	ULFQ01000279.1	124592	210
101348	ZNF850	HGNC:27994	NSC ULFQ01000279.1	Vicoso_et_al_2013a:Dataset_S1(ENSACAG00000023950)	ZW Pair	Ambiguous:Crotalus-Sisturus-Protobothrops;Colubridae		yes		ZNF	ENSG00000267041	19	36714383				ENSACAG00000023950	GL343575.1	19040	Scaffold2084	21754	657	CM012307.1	135503	760	scaffold740	22488	750	ULFQ01000279.1	47518	747
101349	ZSCAN25	HGNC:21961	CVI CM012323.1			Ambiguous:Crotalus-Sisturus-Protobothrops;Colubridae				ZNF	ENSG00000197037	7	99616946							Scaffold3908	26076	154	CM012323.1	105413897	175	scaffold1015	162600	174	ULFQ01000279.1	279279	163
101350	ZKSCAN1	HGNC:13101	CVI CM012323.1			Ambiguous:Crotalus-Sisturus-Protobothrops;Colubridae				ZNF							ENSACAG00000028962	GL343279.1	466880	Scaffold1856	138981	246	CM012323.1	105413993	207	scaffold3099	43426	208	ULFQ01000174.1	1558454	239
101351	ZNF24	HGNC:13032	CVI CM012323.1			Ambiguous:Crotalus-Sisturus-Protobothrops;Colubridae				ZNF							ENSACAG00000029565	GL343279.1	453674	Scaffold1856	151211	248	CM012323.1	105428860	222	scaffold58	4374	224	ULFQ01000174.1	1543546	224
101352	ZSCAN9	HGNC:12984	CVI CM012323.1			Ambiguous:Crotalus-Sisturus-Protobothrops;Colubridae				ZNF	ENSG00000137185	6	28224886							Scaffold1856	151709	146	CM012323.1	105429088	165	scaffold736	507232	133	ULFQ01000329.1	83036	141
101353	ZNF274	HGNC:13068	BCO Scaffold1856			Ambiguous:Crotalus-Sisturus-Protobothrops;Colubridae				ZNF	ENSG00000171606	19	58183029							Scaffold1856	151718	143	CM012307.1	8050839	148	scaffold906	50311	144	ULFQ01000358.1	71067	134
101354	ZSCAN22	HGNC:4929	CVI CM012323.1			Ambiguous:Crotalus-Sisturus-Protobothrops;Colubridae				ZNF	ENSG00000182318	19	58327019							Scaffold1856	139056	177	CM012323.1	105429097	192	scaffold906	92643	193	ULFQ01000279.1	279294	169
101355	ZKSCAN1	HGNC:13101	CVI CM012323.1			Ambiguous:Crotalus-Sisturus-Protobothrops;Colubridae				ZNF	ENSG00000106261	7	100015572							Scaffold1856	151727	174	CM012323.1	105429106	174	scaffold343	10490	169	ULFQ01000344.1	233520	159
101356	ZKSCAN4	HGNC:13854	CVI CM012323.1			Ambiguous:Crotalus-Sisturus-Protobothrops;Colubridae				ZNF	ENSG00000187626	6	28244623				ENSACAG00000025867	GL343514.1	213917	Scaffold8888	41490	169	CM012323.1	105429106	175	scaffold736	82059	166	ULFQ01000198.1	1231141	167
101357	ZNF165	HGNC:12953	CVI CM012323.1			Ambiguous:Crotalus-Sisturus-Protobothrops;Colubridae				ZNF	ENSG00000197279	6	28080975							Scaffold1856	151727	148	CM012323.1	105429106	143	scaffold736	505315	136	ULFQ01000279.1	142423	145
101358	ZSCAN21	HGNC:13104	CVI CM012323.1			Ambiguous:Crotalus-Sisturus-Protobothrops;Colubridae				ZNF	ENSG00000166529	7	100049774							Scaffold1856	151727	177	CM012323.1	105429106	189	scaffold736	81810	175	ULFQ01000279.1	279279	179
101359	ZKSCAN2	HGNC:25677	CVI CM012323.1			Ambiguous:Crotalus-Sisturus-Protobothrops;Colubridae				ZNF	ENSG00000155592	16	25236001							Scaffold1856	151736	162	CM012323.1	105429115	165	scaffold736	507250	155	ULFQ01000344.1	231473	159
101360	SLX1A	HGNC:20922	CVI CM012323.1			Ambiguous:Crotalus-Sisturus-Protobothrops;Colubridae					ENSG00000132207	16	30193887	ENSGALG00000044283	8	29928955	ENSACAG00000015221	GL343279.1	450819	Scaffold1856	160267	218	CM012323.1	105438172	200	scaffold58	13843	210	ULFQ01000174.1	1536355	214
101361	BOLA2	HGNC:29488	CVI CM012323.1			Ambiguous:Crotalus-Sisturus-Protobothrops;Colubridae					ENSG00000183336	16	29443056							Scaffold1856	164536	26	CM012323.1	105443844	45	scaffold58	19471	45	ULFQ01000174.1	1532793	25
101362	CORO1A	HGNC:2252	CVI CM012323.1			Ambiguous:Crotalus-Sisturus-Protobothrops;Colubridae					ENSG00000102879	16	30182827				ENSACAG00000015112	GL343279.1	434271	Scaffold1856	171246	390	CM012323.1	105451292	395	scaffold58	26959	396	ULFQ01000174.1	1500059	395
101363	MAPK3	HGNC:6877	CVI CM012323.1			Ambiguous:Crotalus-Sisturus-Protobothrops;Colubridae					ENSG00000102882	16	30114105				ENSACAG00000015056	GL343279.1	412242	Scaffold1856	192080	364	CM012323.1	105473553	364	scaffold58	50211	362	ULFQ01000174.1	1475309	359
101364	GDPD3	HGNC:28638	CVI CM012323.1			Ambiguous:Crotalus-Sisturus-Protobothrops;Colubridae					ENSG00000102886	16	30104810							Scaffold2429	16634	47	CM012323.1	105513406	67	scaffold58	87397	62	ULFQ01000174.1	1441115	55
101365	YPEL3	HGNC:18327	CVI CM012323.1			Ambiguous:Crotalus-Sisturus-Protobothrops;Colubridae					ENSG00000090238	16	30092314							Scaffold1856	234367	114	CM012323.1	105535708	113	scaffold58	125553	113	ULFQ01000174.1	1415341	113
101366	TBX6	HGNC:11605	CVI CM012323.1			Ambiguous:Crotalus-Sisturus-Protobothrops;Colubridae					ENSG00000149922	16	30085793	ENSGALG00000006374	15	8285250	ENSACAG00000015031	GL343279.1	356983	Scaffold1856	245567	383	CM012323.1	105553941	372	scaffold58	144935	370	ULFQ01000174.1	1378380	374
101367	PPP4C	HGNC:9319	CVI CM012323.1			Ambiguous:Crotalus-Sisturus-Protobothrops;Colubridae					ENSG00000149923	16	30075978				ENSACAG00000014977	GL343279.1	347247	Scaffold1856	258852	307	CM012323.1	105568431	307	scaffold58	159692	307	ULFQ01000174.1	1373328	307
101368	ALDOA	HGNC:414	CVI CM012323.1			Ambiguous:Crotalus-Sisturus-Protobothrops;Colubridae					ENSG00000149925	16	30064164				ENSACAG00000014919	GL343279.1	323095	Scaffold1856	270848	350	CM012323.1	105583029	345	scaffold58	173828	345	ULFQ01000174.1	1340034	346
101369	CRK	HGNC:2362	CVI CM012323.1			Ambiguous:Crotalus-Sisturus-Protobothrops;Colubridae											ENSACAG00000014912	GL343279.1	314148	Scaffold1856	285208	245	CM012323.1	105599385	244	scaffold58	190813	244	ULFQ01000174.1	1323870	245
101370	TLCD3B	HGNC:25295	CVI CM012323.1			Ambiguous:Crotalus-Sisturus-Protobothrops;Colubridae					ENSG00000149926	16	30024427				ENSACAG00000014874	GL343279.1	281561	Scaffold1856	308331	242	CM012323.1	105621486	237	scaffold58	215905	236	ULFQ01000174.1	1295372	239
101371	MVP	HGNC:7531	CVI CM012323.1			Ambiguous:Crotalus-Sisturus-Protobothrops;Colubridae					ENSG00000013364	16	29820394	ENSGALG00000040471	28	30057	ENSACAG00000014742	GL343279.1	241237	Scaffold1856	317540	716	CM012323.1	105631193	740	scaffold58	225911	741	ULFQ01000174.1	1260797	692
101372	MAZ	HGNC:6914	CVI CM012323.1			Ambiguous:Crotalus-Sisturus-Protobothrops;Colubridae					ENSG00000103495	16	29806106				ENSACAG00000014698	GL343279.1	224366	Scaffold1856	355730	375	CM012323.1	105676238	375	scaffold639	7052	393	ULFQ01000174.1	1206964	375
101373	PRRT2	HGNC:30500	CVI CM012323.1			Ambiguous:Crotalus-Sisturus-Protobothrops;Colubridae					ENSG00000167371	16	29811382				ENSACAG00000014648	GL343279.1	202846	Scaffold1856	379353	165	CM012323.1	105699271	175	scaffold639	33570	177	ULFQ01000174.1	1193271	169
101374	CDIPT	HGNC:1769	CVI CM012323.1			Ambiguous:Crotalus-Sisturus-Protobothrops;Colubridae					ENSG00000103502	16	29858357				ENSACAG00000014661	GL343279.1	182984	Scaffold1856	391409	191	CM012323.1	105712313	193	scaffold639	51444	191	ULFQ01000174.1	1175152	189
101375	TAOK2	HGNC:16835	CVI CM012323.1			Ambiguous:Crotalus-Sisturus-Protobothrops;Colubridae					ENSG00000149930	16	29973641				ENSACAG00000014439	GL343279.1	140550	Scaffold1856	415511	979	CM012323.1	105739259	985	scaffold639	76286	985	ULFQ01000174.1	1126543	984
101376	KCTD13	HGNC:22234	CVI CM012323.1			Ambiguous:Crotalus-Sisturus-Protobothrops;Colubridae					ENSG00000174943	16	29905012				ENSACAG00000014374	GL343279.1	82104	Scaffold1856	483029	322	CM012323.1	105825668	318	scaffold639	164356	317	ULFQ01000174.1	1059384	322
101377	KIF22	HGNC:6391	CVI CM012323.1			Ambiguous:Crotalus-Sisturus-Protobothrops;Colubridae					ENSG00000079616	16	29790719				ENSACAG00000014338	GL343279.1	58388	Scaffold1856	496543	366	CM012323.1	105838720	366	scaffold639	182138	361	ULFQ01000174.1	1039152	354
101378	PAGR1	HGNC:28707	CVI CM012323.1			Ambiguous:Crotalus-Sisturus-Protobothrops;Colubridae					ENSG00000280789	16	29815952				ENSACAG00000014321	GL343279.1	49218	Scaffold1856	512740	185	CM012323.1	105860707	185	scaffold639	204907	187	ULFQ01000174.1	1026196	181
101379	ASPHD1	HGNC:27380	Published as candidate W-linked	Vicoso_et_al_2013a:Dataset_S1(ENSACAG00000014305)	ZW Pair	Ambiguous:Crotalus-Sisturus-Protobothrops;Colubridae		yes									ENSACAG00000007274	GL343220.1	2082475	Scaffold1856	1787292	281	CM012323.1	107379311	335	scaffold639	1908614	317	ULFQ01000198.1	725399	325
101380	SEZ6L2	HGNC:30844	Published as candidate W-linked	Vicoso_et_al_2013a:Dataset_S1(ENSACAG00000014033)	ZW Pair	Ambiguous:Crotalus-Sisturus-Protobothrops;Colubridae			yes		ENSG00000077097	3	25597905	ENSGALG00000011300	2	37979550	ENSACAG00000008939	GL343380.1	735894	Scaffold502	1588276	1486	CM012323.1	42538550	1480	scaffold296	228506	1493	ULFQ01000426.1	164100	1502
101381	DUSP14	HGNC:17007	CVI CM012323.1			Ambiguous:Crotalus-Sisturus-Protobothrops;Colubridae					ENSG00000276023	17	37489831	ENSGALG00000027641	19	8603612	ENSACAG00000010171	GL343606.1	348060	Scaffold1856	563240	188	CM012323.1	105944622	184	scaffold639	263256	183	ULFQ01000174.1	955416	186
101382	HIRIP3	HGNC:4917	CVI CM012323.1			Ambiguous:Crotalus-Sisturus-Protobothrops;Colubridae					ENSG00000149929	16	29992321				ENSACAG00000010176	GL343606.1	329912	Scaffold1856	570514	175	CM012323.1	105950762	134	scaffold639	269320	150	ULFQ01000174.1	934647	137
101383	INO80E	HGNC:26905	CVI CM012323.1			Ambiguous:Crotalus-Sisturus-Protobothrops;Colubridae					ENSG00000169592	16	29995294				ENSACAG00000010179	GL343606.1	315701	Scaffold1856	583923	211	CM012323.1	105970366	220	scaffold639	288628	221	ULFQ01000174.1	912214	209
101384	DOC2A	HGNC:2985	CVI CM012323.1			Ambiguous:Crotalus-Sisturus-Protobothrops;Colubridae					ENSG00000149927	16	30005509				ENSACAG00000010202	GL343606.1	252295	Scaffold1856	599189	366	CM012323.1	105990437	360	scaffold639	307468	361	ULFQ01000174.1	882986	357
101385	ZG16	HGNC:30961	CVI CM012323.1			Ambiguous:Crotalus-Sisturus-Protobothrops;Colubridae					ENSG00000174992	16	29778240				ENSACAG00000010289	GL343606.1	179481	Scaffold1856	674705	106	CM012323.1	106082624	111	scaffold639	404960	110	ULFQ01000174.1	798257	104
101386	LOC100567618	NCBI:100567618	CVI CM012323.1			Ambiguous:Crotalus-Sisturus-Protobothrops;Colubridae											ENSACAG00000010300	GL343606.1	144404	Scaffold1856	686776	376	CM012323.1	106121041	371	scaffold639	422956	371	ULFQ01000174.1	770780	372
101387	TNFRSF12A	HGNC:18152	CVI CM012323.1			Ambiguous:Crotalus-Sisturus-Protobothrops;Colubridae					ENSG00000006327	16	3018445				ENSACAG00000028480	GL343606.1	3430	Scaffold1856	734338	82	CM012323.1	106172994	80	scaffold639	591075	75	ULFQ01000174.1	587265	74
101388	THOC6	HGNC:28369	CVI CM012323.1			Ambiguous:Crotalus-Sisturus-Protobothrops;Colubridae					ENSG00000131652	16	3024027				ENSACAG00000010341	GL343516.1	478923	Scaffold1856	853475	300	CM012323.1	106257862	298	scaffold639	632275	297	ULFQ01000174.1	541448	298
101389	HCFC1R1	HGNC:21198	CVI CM012323.1			Ambiguous:Crotalus-Sisturus-Protobothrops;Colubridae											ENSACAG00000028325	GL343516.1	466032	Scaffold1856	865126	94	CM012323.1	106270852	77	scaffold639	644492	101	ULFQ01000174.1	535504	79
101390	RAB35	HGNC:9774	CVI CM012323.1			Ambiguous:Crotalus-Sisturus-Protobothrops;Colubridae											ENSACAG00000010402	GL343516.1	457123	Scaffold1856	869178	178	CM012323.1	106273879	179	scaffold639	649343	162	ULFQ01000174.1	528556	177
101391	BICDL2	HGNC:33584	CVI CM012323.1			Ambiguous:Crotalus-Sisturus-Protobothrops;Colubridae					ENSG00000162069	16	3027682				ENSACAG00000010435	GL343516.1	424327	Scaffold1856	891607	305	CM012323.1	106297877	300	scaffold639	675113	346	ULFQ01000174.1	483736	295
101392	MMP25	HGNC:14246	CVI CM012323.1			Ambiguous:Crotalus-Sisturus-Protobothrops;Colubridae					ENSG00000008516	16	3046681				ENSACAG00000010453	GL343516.1	392295	Scaffold1856	931988	383	CM012323.1	106353436	332	scaffold639	726123	354	ULFQ01000174.1	451072	344
101393	ITGAM	HGNC:6149	CVI CM012323.1			Ambiguous:Crotalus-Sisturus-Protobothrops;Colubridae											ENSACAG00000010509	GL343516.1	357601	Scaffold1856	949835	375	CM012323.1	106374610	345	scaffold639	747507	381	ULFQ01000174.1	396841	290
101394	CD2BP2	HGNC:1656	CVI CM012323.1			Ambiguous:Crotalus-Sisturus-Protobothrops;Colubridae					ENSG00000169217	16	30350766				ENSACAG00000010595	GL343516.1	352103	Scaffold1856	989353	292	CM012323.1	106435028	280	scaffold639	801351	267	ULFQ01000174.1	376984	291
101395	TBC1D10B	HGNC:24510	CVI CM012323.1			Ambiguous:Crotalus-Sisturus-Protobothrops;Colubridae					ENSG00000169221	16	30357102				ENSACAG00000010627	GL343516.1	322262	Scaffold1856	1008298	536	CM012323.1	106457063	546	scaffold639	823296	546	ULFQ01000174.1	326389	545
101396	MYLPF	HGNC:29824	CVI CM012323.1			Ambiguous:Crotalus-Sisturus-Protobothrops;Colubridae					ENSG00000180209	16	30370934				ENSACAG00000010684	GL343516.1	305626	Scaffold1856	1032836	157	CM012323.1	106482216	153	scaffold639	847426	154	ULFQ01000174.1	305248	156
101397	QPRT	HGNC:9755	CVI CM012323.1			Ambiguous:Crotalus-Sisturus-Protobothrops;Colubridae					ENSG00000103485	16	29679008				ENSACAG00000010734	GL343516.1	301415	Scaffold1856	1042930	263	CM012323.1	106492088	252	scaffold639	859413	249	ULFQ01000174.1	300402	256
101398	DCTPP1	HGNC:28777	CVI CM012323.1			Ambiguous:Crotalus-Sisturus-Protobothrops;Colubridae					ENSG00000179958	16	30423619				ENSACAG00000010745	GL343516.1	290808	Scaffold1856	1054452	106	CM012323.1	106506099	61	scaffold639	874206	96	ULFQ01000174.1	287697	114
101399	SEPTIN1	HGNC:2879	CVI CM012323.1			Ambiguous:Crotalus-Sisturus-Protobothrops;Colubridae					ENSG00000180096	16	30378133				ENSACAG00000010754	GL343516.1	283987	Scaffold1856	1058594	322	CM012323.1	106511699	271	scaffold639	879665	317	ULFQ01000174.1	276801	292
101400	ITGAL	HGNC:6148	CVI CM012323.1			Ambiguous:Crotalus-Sisturus-Protobothrops;Colubridae					ENSG00000005844	16	30472658				ENSACAG00000010992	GL343516.1	235225	Scaffold1856	743141	530	CM012323.1	106545075	588	scaffold639	930006	499	ULFQ01000174.1	189931	485
101401	ZNF271P	HGNC:13065	CVI CM012323.1			Ambiguous:Crotalus-Sisturus-Protobothrops;Colubridae											ENSACAG00000011349	GL343516.1	205193	Scaffold1856	1141350	561	CM012323.1	106583294	522	scaffold639	985696	509	ULFQ01000174.1	168703	504
101402	BORCS6	HGNC:25939	CVI CM012323.1			Ambiguous:Crotalus-Sisturus-Protobothrops;Colubridae					ENSG00000196544	17	8188333	ENSGALG00000028145	3	76105664	ENSACAG00000011402	GL343516.1	222460	Scaffold1856	1148146	160	CM012323.1	106590779	163	scaffold639	994799	161	ULFQ01000174.1	177278	162
101403	PRR14	HGNC:28458	CVI CM012323.1			Ambiguous:Crotalus-Sisturus-Protobothrops;Colubridae					ENSG00000156858	16	30650717				ENSACAG00000011410	GL343516.1	183831	Scaffold1856	1171601	129	CM012323.1	106612887	128	scaffold639	1020040	129	ULFQ01000174.1	135526	127
101404	FBRS	HGNC:20442	CVI CM012323.1			Ambiguous:Crotalus-Sisturus-Protobothrops;Colubridae					ENSG00000156860	16	30658431				ENSACAG00000011419	GL343516.1	159998	Scaffold1856	1184081	672	CM012323.1	106627873	644	scaffold639	1037072	622	ULFQ01000174.1	106147	614
101405	ZNF853	HGNC:21767	BCO Scaffold1856			Ambiguous:Crotalus-Sisturus-Protobothrops;Colubridae					ENSG00000236609	7	6615617							Scaffold1856	1207589	99	CM012321.1	5439750	136	scaffold80	2088	147	ULFQ01000313.1	402675	104
101406	SRCAP	HGNC:16974	CVI CM012323.1			Ambiguous:Crotalus-Sisturus-Protobothrops;Colubridae					ENSG00000080603	16	30698209				ENSACAG00000011495	GL343516.1	129011	Scaffold1856	1215699	1120	CM012323.1	106665777	1183	scaffold639	1075535	1167	ULFQ01000174.1	60725	1191
101407	PHKG2	HGNC:8931	CVI CM012323.1			Ambiguous:Crotalus-Sisturus-Protobothrops;Colubridae					ENSG00000156873	16	30748270				ENSACAG00000011548	GL343516.1	96060	Scaffold1856	1255285	372	CM012323.1	106711029	375	scaffold639	1122818	375	ULFQ01000174.1	39008	364
101408	CCDC189	HGNC:28078	CVI CM012323.1			Ambiguous:Crotalus-Sisturus-Protobothrops;Colubridae					ENSG00000196118	16	30757423				ENSACAG00000011669	GL343516.1	80717	Scaffold1856	1264410	189	CM012323.1	106721391	197	scaffold639	1136983	187	ULFQ01000174.1	32823	181
101409	TMEM265	HGNC:51241	NSC ULFQ01000174.1			Ambiguous:Crotalus-Sisturus-Protobothrops;Colubridae					ENSG00000281991	16	30740381													scaffold639	1112588	19	ULFQ01000174.1	19910	27
101410	RNF40	HGNC:16867	CVI CM012323.1			Ambiguous:Crotalus-Sisturus-Protobothrops;Colubridae					ENSG00000103549	16	30761745				ENSACAG00000011688	GL343516.1	65389	Scaffold1856	1272727	952	CM012323.1	106731691	791	scaffold639	1149499	893	ULFQ01000174.1	12625	909
101411	RUSF1	HGNC:25848	CVI CM012323.1			Ambiguous:Crotalus-Sisturus-Protobothrops;Colubridae					ENSG00000140688	16	31489471				ENSACAG00000029469	GL343516.1	51323	Scaffold1856	1290110	325	CM012323.1	106754387	290	scaffold639	1176783	304	ULFQ01000198.1	8582	307
101412	SLC5A2	HGNC:11037	CVI CM012323.1			Ambiguous:Crotalus-Sisturus-Protobothrops;Colubridae					ENSG00000140675	16	31483002				ENSACAG00000011926	GL343516.1	34320	Scaffold1856	1300074	504	CM012323.1	106770641	422	scaffold639	1199024	489	ULFQ01000198.1	26157	365
101413	CA4	HGNC:1375	Published as candidate W-linked	Vicoso_et_al_2013a:Dataset_S1(ENSACAG00000012103)	ZW Pair	Ambiguous:Crotalus-Sisturus-Protobothrops;Colubridae		yes			ENSG00000100445	14	24439766				ENSACAG00000009077	GL343220.1	777892	Scaffold9012	67288	230	CM012323.1	108812665	199	scaffold959	159440	202	ULFQ01000419.1	179171	196
101414	ARMC5	HGNC:25781	CVI CM012323.1			Ambiguous:Crotalus-Sisturus-Protobothrops;Colubridae					ENSG00000140691	16	31458080				ENSACAG00000006107	GL343220.1	2513462	Scaffold1856	1376543	588	CM012323.1	106904725	538	scaffold639	1366768	562	ULFQ01000198.1	166143	565
101415	TGFB1I1	HGNC:11767	CVI CM012323.1			Ambiguous:Crotalus-Sisturus-Protobothrops;Colubridae					ENSG00000140682	16	31471585				ENSACAG00000006114	GL343220.1	2473946	Scaffold1856	1396492	419	CM012323.1	106934315	370	scaffold639	1395583	413	ULFQ01000198.1	194957	393
101416	ITGAX	HGNC:6152	CVI CM012323.1			Ambiguous:Crotalus-Sisturus-Protobothrops;Colubridae					ENSG00000140678	16	31355134	ENSGALG00000041298	14	15017286	ENSACAG00000006162	GL343220.1	2431120	Scaffold1856	1424508	666	CM012323.1	106971472	468	scaffold639	1430377	548	ULFQ01000198.1	226446	432
101417	COX6A2	HGNC:2279	DAC scaffold639			Ambiguous:Crotalus-Sisturus-Protobothrops;Colubridae					ENSG00000156885	16	31427731							Scaffold1856	1465667	21	CM012321.1	5146489	22	scaffold639	1480730	33	ULFQ01000397.1	329012	36
101418	ITGAE	HGNC:6147	CVI CM012323.1			Ambiguous:Crotalus-Sisturus-Protobothrops;Colubridae					ENSG00000083457	17	3714628							Scaffold1856	1111991	79	CM012323.1	106986549	68	scaffold639	894550	57	ULFQ01000296.1	156463	56
101419	ITGAM	HGNC:6149	CVI CM012323.1			Ambiguous:Crotalus-Sisturus-Protobothrops;Colubridae					ENSG00000169896	16	31259967							Scaffold1856	1469065	156	CM012323.1	107021252	182	scaffold639	1485075	197	ULFQ01000198.1	203567	184
101420	ITGAD	HGNC:6146	CVI CM012323.1			Ambiguous:Crotalus-Sisturus-Protobothrops;Colubridae					ENSG00000156886	16	31393312							Scaffold1856	1478190	163	CM012323.1	107039997	135	scaffold639	1495436	163	ULFQ01000198.1	312172	158
101421	ITGAM	HGNC:6149	CVI CM012323.1			Ambiguous:Crotalus-Sisturus-Protobothrops;Colubridae											ENSACAG00000005296	GL343287.1	369977	Scaffold2907	725992	29	CM012323.1	107047410	28				ULFQ01000092.1	2737224	91
101422	TRIM72	HGNC:32671	CVI CM012323.1			Ambiguous:Crotalus-Sisturus-Protobothrops;Colubridae					ENSG00000177238	16	31214021				ENSACAG00000006665	GL343220.1	2369790	Scaffold1856	1514301	409	CM012323.1	107084710	390	scaffold639	1559848	394	ULFQ01000198.1	386466	389
101423	PYDC1	HGNC:30261	NSC ULFQ01000198.1			Ambiguous:Crotalus-Sisturus-Protobothrops;Colubridae					ENSG00000169900	16	31215962																ULFQ01000198.1	439802	21
101424	PYCARD	HGNC:16608	CVI CM012323.1			Ambiguous:Crotalus-Sisturus-Protobothrops;Colubridae					ENSG00000103490	16	31201485				ENSACAG00000006690	GL343220.1	2341931	Scaffold1856	1582655	104	CM012323.1	107117716	80	scaffold639	1616432	35	ULFQ01000198.1	439799	59
101425	KAT8	HGNC:17933	Published as candidate W-linked	Vicoso_et_al_2013a:Dataset_S1(ENSACAG00000006708)	ZW Pair	Ambiguous:Crotalus-Sisturus-Protobothrops;Colubridae			yes		ENSG00000108797	17	42682613	ENSGALG00000003123	27	5427312	ENSACAG00000013861	6	61899126	Scaffold4952	127608	1084	CM012323.1	72795185	1084	scaffold2738	2912	915	ULFQ01000122.1	196124	1071
101426	ZNF883	HGNC:27271	NSC ULFQ01000198.1			Ambiguous:Crotalus-Sisturus-Protobothrops;Colubridae											ENSACAG00000006697	GL343220.1	2330463	Scaffold2084	11556	302	CM012307.1	88657	368	scaffold1321	18341	308	ULFQ01000198.1	464618	323
101427	FBXL19	HGNC:25300	CVI CM012323.1			Ambiguous:Crotalus-Sisturus-Protobothrops;Colubridae					ENSG00000099364	16	30923055				ENSACAG00000007651	GL343220.1	1809604	Scaffold1856	2045970	595	CM012323.1	107172585	255	scaffold1061	296433	604	ULFQ01000198.1	1074632	606
101428	PRSS8	HGNC:9491	CVI CM012323.1			Ambiguous:Crotalus-Sisturus-Protobothrops;Colubridae					ENSG00000052344	16	31131433				ENSACAG00000006748	GL343220.1	2290775	Scaffold1856	1630639	220	CM012323.1	107179542	209	scaffold639	1669057	211	ULFQ01000198.1	446923	201
101429	FUS	HGNC:4010	CVI CM012323.1			Ambiguous:Crotalus-Sisturus-Protobothrops;Colubridae					ENSG00000089280	16	31180110	ENSGALG00000032219	AADN04001416.1	3	ENSACAG00000006776	GL343220.1	2260486	Scaffold1856	1652781	464	CM012323.1	107211501	463	scaffold639	1704670	456	ULFQ01000198.1	547230	420
101430	BCKDK	HGNC:16902	Published as candidate W-linked	Vicoso_et_al_2013a:Dataset_S1(ENSACAG00000006961)	ZW Pair	Ambiguous:Crotalus-Sisturus-Protobothrops;Colubridae			yes		ENSG00000136485	17	63550461	ENSGALG00000000510	27	2884255	ENSACAG00000012744	6	60958040	Scaffold2879	312819	342	CM012323.1	75261249	342	scaffold709	14757	342	ULFQ01000122.1	1278318	342
101431	VKORC1	HGNC:23663	NSC ULFQ01000198.1			Ambiguous:Crotalus-Sisturus-Protobothrops;Colubridae					ENSG00000167397	16	31090842				ENSACAG00000007025	GL343220.1	2177077	Scaffold1856	1712082	130	CM012306.1	299605237	51	scaffold639	1794961	127	ULFQ01000198.1	634878	125
101432	PRSS53	HGNC:34407	CVI CM012323.1			Ambiguous:Crotalus-Sisturus-Protobothrops;Colubridae					ENSG00000151006	16	31083425				ENSACAG00000007085	GL343220.1	2121815	Scaffold1856	1746713	352	CM012323.1	107321431	326	scaffold639	1734972	333	ULFQ01000198.1	677030	332
101433	ZNF646	HGNC:29004	CVI CM012323.1			Ambiguous:Crotalus-Sisturus-Protobothrops;Colubridae					ENSG00000167395	16	31074422				ENSACAG00000022516	GL343220.1	2110741	Scaffold1856	1762922	401	CM012323.1	107343103	446	scaffold639	1866936	433	ULFQ01000198.1	695560	444
101434	FLT3LG	HGNC:3766	BCO Scaffold1856	Vicoso_et_al_2013a:Dataset_S1(ENSACAG00000017350)	ZW Pair	Crotalus-Sisturus;Colubridae		yes			ENSG00000164047	3	48223347	ENSGALG00000019696	2	4020689	ENSACAG00000006634	GL343332.1	1040726				CM012307.1	183107371	17	scaffold88	1871591	20	ULFQ01000196.1	798705	21
101435	ZNF668	HGNC:25821	CVI CM012323.1			Crotalus-Sisturus;Colubridae					ENSG00000167394	16	31060843							Scaffold1856	1779303	326	CM012323.1	107364615	326	scaffold639	1891383	326	ULFQ01000198.1	717416	314
101436	PRF1	HGNC:9360	Published as candidate W-linked; rearranged in lizard-snake ancestor	Vicoso_et_al_2013a:Dataset_S1(ENSACAG00000007274)	ZW Pair	Crotalus-Sisturus;Colubridae			yes		ENSG00000186868	17	45894382	ENSGALG00000000625	27	3126090	ENSACAG00000017319	6	66953395	Scaffold751	1029302	337	CM012323.1	80916506	345	scaffold1591	53647	342	ULFQ01000121.1	2674685	344
101437	STX4	HGNC:11439	CVI CM012323.1			Crotalus-Sisturus;Colubridae					ENSG00000103496	16	31032889				ENSACAG00000007287	GL343220.1	2046571	Scaffold1856	1809786	170	CM012323.1	107393329	184	scaffold639	1924363	166	ULFQ01000198.1	768016	141
101438	STX1B	HGNC:18539	CVI CM012323.1			Crotalus-Sisturus;Colubridae					ENSG00000099365	16	30989256				ENSACAG00000007428	GL343220.1	1994677	Scaffold1856	1835322	285	CM012323.1	107471458	276	scaffold639	1971646	286	ULFQ01000198.1	812838	284
101439	HSD3B7	HGNC:18324	NSC ULFQ01000198.1			Crotalus-Sisturus;Colubridae					ENSG00000099377	16	30985207				ENSACAG00000007559	GL343220.1	1914842	Scaffold1856	1911069	259	CM012312.1	18686360	275	scaffold1639	4005	173	ULFQ01000198.1	905758	247
101440	SETD1A	HGNC:29010	CVI CM012323.1			Crotalus-Sisturus;Colubridae					ENSG00000099381	16	30957294				ENSACAG00000007606	GL343220.1	1873149	Scaffold1856	1980411	1354	CM012323.1	107563521	1299	scaffold1061	382728	1349	ULFQ01000198.1	1008571	1241
101441	ORAI3	HGNC:28185	CVI CM012323.1			Crotalus-Sisturus;Colubridae					ENSG00000175938	16	30949066				ENSACAG00000007631	GL343220.1	1845020	Scaffold1856	2022826	147	CM012323.1	107601874	219	scaffold1061	241934	225	ULFQ01000198.1	1045036	221
101442	CEBPZ	HGNC:24218	NSC ULFQ01000198.1			Crotalus-Sisturus;Colubridae											ENSACAG00000007693	GL343220.1	1775123										ULFQ01000198.1	1173114	31
101443	CTF1	HGNC:2499	NSC ULFQ01000198.1			Crotalus-Sisturus;Colubridae					ENSG00000150281	16	30896607				ENSACAG00000007701	GL343220.1	1753549	Scaffold1856	2118948	94							ULFQ01000198.1	1188975	75
101444	BCL7C	HGNC:1006	CVI CM012323.1			Crotalus-Sisturus;Colubridae					ENSG00000099385	16	30833626				ENSACAG00000007705	GL343220.1	1716531	Scaffold1856	2131543	150	CM012323.1	107746513	149	scaffold1061	202497	138	ULFQ01000198.1	1208697	129
101445	MAPK7	HGNC:6880	CVI CM012323.1			Crotalus-Sisturus;Colubridae					ENSG00000166484	17	19377721				ENSACAG00000007736	GL343220.1	1649808	Scaffold12924	58948	695	CM012323.1	107808947	643	scaffold1061	134637	673	ULFQ01000198.1	1269648	673
101446	TRIM27	HGNC:9975	CVI CM012323.1			Crotalus-Sisturus;Colubridae					ENSG00000204713	6	28903002	ENSGALG00000044592	LGE64	189623	ENSACAG00000007798	GL343220.1	1631964	Scaffold12924	41099	350	CM012323.1	107836174	274	scaffold1061	108541	303	ULFQ01000198.1	1292894	297
101447	ZNF850	HGNC:27994	ACA GL343220.1			Crotalus-Sisturus;Colubridae				ZNF	ENSG00000267041	19	36714383				ENSACAG00000007726	GL343220.1	1668065	Scaffold12924	76435	571	CM012307.1	135503	760	scaffold47	61017	597	ULFQ01000358.1	115554	583
101448	TRIM69	HGNC:17857	CVI CM012323.1			Crotalus-Sisturus;Colubridae											ENSACAG00000007725	GL343220.1	1692978	Scaffold3279	687709	73	CM012323.1	107849340	64	scaffold1061	108634	64	ULFQ01000218.1	973308	96
101449	RFPL4A	HGNC:16449	NSC ULFQ01000198.1			Crotalus-Sisturus;Colubridae					ENSG00000223638	19	55759014							Scaffold237	969538	32	CM012307.1	4090031	24	scaffold175	550036	24	ULFQ01000198.1	1306762	28
101450	MEFV	HGNC:6998	CVI CM012323.1			Crotalus-Sisturus;Colubridae					ENSG00000103313	16	3242028							Scaffold237	527426	50	CM012323.1	107849433	27	scaffold175	550057	55	ULFQ01000218.1	977562	33
101451	RFPL4B	HGNC:33264	CVI CM012323.1			Crotalus-Sisturus;Colubridae					ENSG00000251258	6	112347330							Scaffold237	527405	21	CM012323.1	107849466	35	scaffold175	548248	28	ULFQ01000316.1	534191	22
101452	OR10AG1	HGNC:19607	CVI CM012323.1			Crotalus-Sisturus;Colubridae				OR							ENSACAG00000007810	GL343220.1	1627629	Scaffold12924	38320	256	CM012323.1	107854072	255	scaffold1061	104823	256	ULFQ01000198.1	1309794	252
101453	OR10P1	HGNC:15378	CVI CM012323.1			Crotalus-Sisturus;Colubridae				OR	ENSG00000175398	12	55636860				ENSACAG00000007820	GL343220.1	1604615	Scaffold10649	8385	215	CM012323.1	107900911	217	scaffold1061	4786	215	ULFQ01009864.1	2263	204
101454	SLC39A2	HGNC:17127	CVI CM012323.1			Crotalus-Sisturus;Colubridae					ENSG00000165794	14	20999255				ENSACAG00000007848	GL343220.1	1565248	Scaffold278	45759	198	CM012323.1	108021865	221	scaffold830	97524	225	ULFQ01000394.1	211593	229
101455	METTL17	HGNC:19280	CVI CM012323.1			Crotalus-Sisturus;Colubridae					ENSG00000165792	14	20989770				ENSACAG00000007865	GL343220.1	1548408	Scaffold278	21298	138	CM012323.1	108047474	194	scaffold830	123598	244	ULFQ01000394.1	189429	195
101456	LOC100568058	NCBI:100568058	CVI CM012323.1			Crotalus-Sisturus;Colubridae				C-type Lectin							ENSACAG00000007984	GL343220.1	1363198	Scaffold4818	89104	114	CM012323.1	108084945	115	scaffold223	62157	115	ULFQ01000352.1	411700	117
101457	CCDC80	HGNC:30649	CVI CM012323.1			Crotalus-Sisturus;Colubridae				C-type Lectin				ENSGALG00000011455	4	49948789	ENSACAG00000007894	GL343220.1	1531632	Scaffold278	2758	97	CM012323.1	108092376	70	scaffold830	166888	61	ULFQ01000394.1	25775	55
101458	RNASE4	HGNC:10047	CVI CM012323.1			Crotalus-Sisturus;Colubridae					ENSG00000258818	14	20684100				ENSACAG00000007898	GL343220.1	1449001	Scaffold12674	188	63	CM012323.1	108095769	64	scaffold830	173160	73	ULFQ01000394.1	113541	72
101459	ANG	HGNC:483	CVI CM012323.1			Crotalus-Sisturus;Colubridae					ENSG00000214274	14	20684177										CM012323.1	108095787	28
101460	OR6J1	HGNC:14707	CVI CM012323.1			Crotalus-Sisturus;Colubridae				OR	ENSG00000255804	14	22630929							Scaffold4818	63029	191	CM012323.1	108151726	186	scaffold223	2002	191	ULFQ01008798.1	865	167
101461	REG4	HGNC:22977	CVI CM012323.1			Crotalus-Sisturus;Colubridae					ENSG00000134193	1	119794018	ENSGALG00000002931	8	4258298	ENSACAG00000007915	GL343220.1	1412168	Scaffold140	16173	88	CM012323.1	108195737	57	scaffold223	43760	87	ULFQ01000352.1	414069	62
101462	ENSACAG00000007927	ENSEMBL:ENSACAG00000007927	CVI CM012323.1			Crotalus-Sisturus;Colubridae				C-type Lectin							ENSACAG00000007927	GL343220.1	1390629	Scaffold4818	89104	115	CM012323.1	108206271	119	scaffold223	62148	117	ULFQ01000352.1	411694	118
101463	LOC100568256	NCBI:100568256	CVI CM012323.1			Crotalus-Sisturus;Colubridae				C-type Lectin							ENSACAG00000007934	GL343220.1	1379314	Scaffold4818	89501	98	CM012323.1	108206657	111	scaffold223	62142	118	ULFQ01000352.1	411682	118
101464	RNASE4	HGNC:10047	NSC ULFQ01000352.1			Crotalus-Sisturus;Colubridae					ENSG00000258818	14	20684100				ENSACAG00000025388	GL343220.1	1279015	Scaffold3921	146527	81	CM012306.1	7255384	90	scaffold223	177256	92	ULFQ01000352.1	395747	90
101465	REG4	HGNC:22977	CVI CM012323.1			Crotalus-Sisturus;Colubridae					ENSG00000134193	1	119794018	ENSGALG00000002931	8	4258298	ENSACAG00000028410	GL343220.1	1287146	Scaffold7237	38	32	CM012323.1	108206669	51	scaffold223	98626	64	ULFQ01000352.1	411694	68
101466	REG4	HGNC:22977	CVI CM012323.1			Crotalus-Sisturus;Colubridae					ENSG00000134193	1	119794018	ENSGALG00000002931	8	4258298	ENSACAG00000007989	GL343220.1	1307193	Scaffold4818	89516	78	CM012323.1	108206681	56	scaffold223	62166	82	ULFQ01000352.1	411709	75
101467	LOC103279558	NCBI:103279558	CVI CM012323.1			Crotalus-Sisturus;Colubridae				C-type Lectin							ENSACAG00000028256	GL343220.1	1339858	Scaffold140	17545	48	CM012323.1	108207553	33	scaffold223	110150	46	ULFQ01000352.1	378595	69
101468	LOC103279580	NCBI:103279580	CVI CM012323.1			Crotalus-Sisturus;Colubridae				C-type Lectin							ENSACAG00000028723	GL343220.1	1350728	Scaffold140	12057	92	CM012323.1	108214712	83	scaffold223	98542	91	ULFQ01000352.1	414069	42
101469	REG4	HGNC:22977	CVI CM012323.1			Crotalus-Sisturus;Colubridae					ENSG00000134193	1	119794018	ENSGALG00000002931	8	4258298	ENSACAG00000011171	GL343442.1	476085				CM012323.1	108235634	23	scaffold223	128460	26
101470	PNP	HGNC:7892	NSC ULFQ01000352.1			Crotalus-Sisturus;Colubridae					ENSG00000198805	14	20468954	ENSGALG00000044146	11	1554680	ENSACAG00000008033	GL343220.1	1237094	Scaffold3921	113527	252	CM012306.1	7283092	253	scaffold223	245600	254	ULFQ01000352.1	365769	254
101471	PIP4P1	HGNC:19299	CVI CM012323.1			Crotalus-Sisturus;Colubridae					ENSG00000165782	14	20457719				ENSACAG00000008074	GL343220.1	1207614	Scaffold3921	72312	252	CM012323.1	108248454	132	scaffold223	295224	249	ULFQ01000352.1	294021	251
101472	APEX1	HGNC:587	CVI CM012323.1			Crotalus-Sisturus;Colubridae					ENSG00000100823	14	20455191				ENSACAG00000008099	GL343220.1	1204334	Scaffold3921	63194	269	CM012323.1	108260110	120	scaffold223	312075	277	ULFQ01000352.1	279780	258
101473	OSGEP	HGNC:18028	NSC ULFQ01000352.1			Crotalus-Sisturus;Colubridae					ENSG00000092094	14	20446411	ENSGALG00000034856	AADN04012244.1	3598	ENSACAG00000008105	GL343220.1	1187750	Scaffold3921	48615	316	PDHV02000023.1	609295	143	scaffold223	324069	316	ULFQ01000352.1	251973	294
101474	SLC12A3	HGNC:10912	CVI CM012323.1			Crotalus-Sisturus;Colubridae											ENSACAG00000008135	GL343220.1	1161203	Scaffold3921	18227	806	CM012323.1	108279300	738	scaffold223	341260	731	ULFQ01000352.1	211812	767
101475	LPCAT4	HGNC:30059	CVI CM012323.1			Crotalus-Sisturus;Colubridae					ENSG00000176454	15	34358618				ENSACAG00000008720	GL343220.1	861914	Scaffold9012	132558	371	CM012323.1	108282660	369	scaffold959	53214	316	ULFQ01000419.1	72180	352
101476	KLHL26	HGNC:25623	CVI CM012323.1			Crotalus-Sisturus;Colubridae					ENSG00000167487	19	18636965	ENSGALG00000027742	28	776960	ENSACAG00000027766	GL343220.1	1128556	Scaffold554	160195	422	CM012323.1	108355785	431	scaffold223	417484	435	ULFQ01000352.1	175846	418
101477	TEP1	HGNC:11726	NSC ULFQ01000352.1			Crotalus-Sisturus;Colubridae					ENSG00000129566	14	20365667				ENSACAG00000008296	GL343220.1	1075013	Scaffold554	104659	1153	CM012317.1	9169586	176	scaffold223	443670	1145	ULFQ01000352.1	66417	1271
101478	PARP2	HGNC:272	CVI CM012323.1			Crotalus-Sisturus;Colubridae					ENSG00000129484	14	20343582				ENSACAG00000008301	GL343220.1	1064801	Scaffold554	34831	407	CM012323.1	108403729	236	scaffold223	526040	389	ULFQ01000352.1	46629	349
101479	PRF1	HGNC:9360	CVI CM012323.1			Crotalus-Sisturus;Colubridae					ENSG00000180644	10	70597348	ENSGALG00000045916	17	727125	ENSACAG00000008358	GL343220.1	1053786	Scaffold554	77024	152	CM012323.1	108422073	159	scaffold223	560572	186	ULFQ01000352.1	19785	125
101480	CCNB1IP1	HGNC:19437	CVI CM012323.1			Crotalus-Sisturus;Colubridae					ENSG00000100814	14	20311368				ENSACAG00000008387	GL343220.1	1038495	Scaffold554	29050	249	CM012323.1	108475933	149	scaffold920	40082	243	ULFQ01000442.1	34147	240
101481	TTC5	HGNC:19274	CVI CM012323.1			Crotalus-Sisturus;Colubridae					ENSG00000136319	14	20256558				ENSACAG00000008636	GL343220.1	1002583	Scaffold554	13490	346	CM012323.1	108481321	278	scaffold920	47996	329	ULFQ01000442.1	39837	318
101482	OR11H6	HGNC:15349	CVI CM012323.1			Crotalus-Sisturus;Colubridae				OR							ENSACAG00000028052	GL343220.1	961659	Scaffold554	2294	205	CM012323.1	108500687	208	scaffold920	175503	204	ULFQ01000442.1	139843	200
101483	OR11G2	HGNC:15346	CVI CM012323.1			Crotalus-Sisturus;Colubridae				OR							ENSACAG00000023955	GL343220.1	982867	Scaffold1973	17693	212	CM012323.1	108543669	180	scaffold920	123943	205	ULFQ01000442.1	149743	168
101484	OR4D10	HGNC:15173	NSC ULFQ01000442.1			Crotalus-Sisturus;Colubridae				OR	ENSG00000254466	11	59473315							Scaffold21794	1053	160	CM012309.1	85897381	146	scaffold920	117317	123	ULFQ01000442.1	178831	139
101485	OR4Q3	HGNC:15426	NSC ULFQ01000442.1			Crotalus-Sisturus;Colubridae				OR							ENSACAG00000008699	GL343220.1	946844	Scaffold9012	18967	103	CM012309.1	85924311	158	scaffold920	168355	171	ULFQ01000442.1	182984	158
101486	OR4A5	HGNC:15162	NSC ULFQ01000442.1			Crotalus-Sisturus;Colubridae				OR	ENSG00000221840	11	54706832							Scaffold938	1223	169	CM012306.1	101042647	164	scaffold506	738355	157	ULFQ01000442.1	183017	133
101487	OR4C16	HGNC:15172	NSC ULFQ01000442.1			Crotalus-Sisturus;Colubridae				OR	ENSG00000279514	11	55572128							Scaffold938	1220	159	CM012309.1	85886384	127	scaffold506	738304	157	ULFQ01000442.1	193770	103
101488	OR4Q3	HGNC:15426	NSC ULFQ01000442.1			Crotalus-Sisturus;Colubridae				OR	ENSG00000182652	14	19743571				ENSACAG00000008689	GL343220.1	953788	Scaffold938	1217	117	CM012309.1	85924305	222	scaffold920	218762	217	ULFQ01000442.1	200574	221
101489	OR4A47	HGNC:31266	NSC ULFQ01000442.1			Crotalus-Sisturus;Colubridae				OR	ENSG00000237388	11	48488717							Scaffold938	1217	171	CM012309.1	85897372	153	scaffold506	738307	170	ULFQ01000442.1	200688	134
101490	OR4D9	HGNC:15178	NSC ULFQ01000442.1			Crotalus-Sisturus;Colubridae				OR	ENSG00000172742	11	59511368							Scaffold6238	74465	158	CM012309.1	85855104	160	scaffold189	49855	139	ULFQ01000442.1	238805	146
101491	OR4K2	HGNC:14728	NSC ULFQ01000442.1			Crotalus-Sisturus;Colubridae				OR	ENSG00000165762	14	19875142							Scaffold938	1223	113	CM012309.1	85897372	137	scaffold920	190922	138	ULFQ01000442.1	238958	140
101492	OR11H6	HGNC:15349	CVI CM012323.1			Crotalus-Sisturus;Colubridae				OR							ENSACAG00000024575	AAWZ02037881	9206	Scaffold1973	40707	211	CM012323.1	108543672	204	scaffold920	129330	201	ULFQ01000442.1	87242	196
101493	OR11H6	HGNC:15349	CVI CM012323.1			Crotalus-Sisturus;Colubridae				OR							ENSACAG00000024641	GL343220.1	968301	Scaffold1973	6882	218	CM012323.1	108552507	205	scaffold920	141662	215	ULFQ01000442.1	139861	199
101494	NUTM1	HGNC:29919	CVI CM012323.1			Crotalus-Sisturus;Colubridae					ENSG00000184507	15	34343315				ENSACAG00000008786	GL343220.1	852503	Scaffold9012	122210	273	CM012323.1	108726817	269	scaffold959	74319	268	ULFQ01000419.1	93874	241
101495	NOP10	HGNC:14378	CVI CM012323.1			Crotalus-Sisturus;Colubridae					ENSG00000182117	15	34341713				ENSACAG00000024255	GL343220.1	845221	Scaffold9012	117764	43	CM012323.1	108740344	44	scaffold959	87777	56	ULFQ01000419.1	111571	57
101496	SLC12A6	HGNC:10914	CVI CM012323.1			Crotalus-Sisturus;Colubridae					ENSG00000140199	15	34229996				ENSACAG00000008808	GL343220.1	787369	Scaffold9012	81551	1063	CM012323.1	108748119	995	scaffold959	99270	1049	ULFQ01000419.1	123193	1066
101497	EMC4	HGNC:28032	CVI CM012323.1			Crotalus-Sisturus;Colubridae					ENSG00000128463	15	34224999				ENSACAG00000009050	GL343220.1	785052	Scaffold9012	77045	167	CM012323.1	108801764	166	scaffold959	151443	167	ULFQ01000419.1	169448	167
101498	SDR39U1	HGNC:20275	Published as candidate W-linked	Vicoso_et_al_2013a:Dataset_S1(ENSACAG00000009077)	ZW Pair	Crotalus-Sisturus;Colubridae			yes		ENSG00000126368	17	40092787	ENSGALG00000029410	27	4778442	ENSACAG00000002847	6	69322211	Scaffold751	2826265	456	CM012323.1	82917766	429	scaffold328	1002727	460	ULFQ01000121.1	567492	461
101499	NYNRIN	HGNC:20165	CVI CM012323.1			Crotalus-Sisturus;Colubridae					ENSG00000205978	14	24398786				ENSACAG00000009105	GL343220.1	751412	Scaffold9012	41780	496	CM012323.1	108832785	472	scaffold959	179378	482	ULFQ01000419.1	197212	473
101500	OR4M1	HGNC:14735	NSC ULFQ01000419.1			Crotalus-Sisturus;Colubridae				OR	ENSG00000176299	14	19773504				ENSACAG00000025829	GL343220.1	922414	Scaffold9012	191056	228	CM012309.1	85855095	226	scaffold959	12165	228	ULFQ01000419.1	20009	210
101501	KHNYN	HGNC:20166	CVI CM012323.1			Crotalus-Sisturus;Colubridae					ENSG00000100441	14	24429286							Scaffold9012	43891	151	CM012323.1	108836235	165	scaffold959	185293	152	ULFQ01000419.1	200043	167
101502	ENSACAG00000009650	ENSEMBL:ENSACAG00000009650	CVI CM012323.1			Pseudoautosomal				VMN2R26							ENSACAG00000009650	GL343220.1	476974	Scaffold9829	42080	417	CM012323.1	108972594	492	scaffold1326	68190	422	ULFQ01000706.1	67172	435
101503	ENSACAG00000009676	ENSEMBL:ENSACAG00000009676	Published as candidate W-linked	Vicoso_et_al_2013a:Dataset_S1(ENSACAG00000009676)	ZW Pair?	Pseudoautosomal		yes		VMN2R26							ENSACAG00000009676	GL343220.1	397023	Scaffold2900	3042	352	CM012323.1	109031753	387	scaffold2292	18953	380	ULFQ01001058.1	4712	367
101504	ENSACAG00000008025	ENSEMBL:ENSACAG00000008025	CVI CM012323.1			Pseudoautosomal				VMN2R26							ENSACAG00000008025	GL343253.1	1899874	Scaffold7859	4482	352	CM012323.1	109031759	430	scaffold929	243622	396	ULFQ01000092.1	4146406	321
101505	ENSACAG00000010990	ENSEMBL:ENSACAG00000010990	CVI CM012323.1			Pseudoautosomal				VMN2R26							ENSACAG00000010990	GL343253.1	1129915	Scaffold4976	166831	305	CM012323.1	109043732	320	scaffold1099	244394	287	ULFQ01000258.1	27316	282
101506	LOC103279549	NCBI:103279549	Published as candidate W-linked	Vicoso_et_al_2013a:Dataset_S1(ENSACAG00000009664)	ZW Pair?	Pseudoautosomal			yes	VMN2R26							ENSACAG00000009664	GL343220.1	432209	Scaffold8178	12307	401	CM012323.1	109070490	464	scaffold1326	13886	465	ULFQ01000479.1	31161	441
101507	LOC103279572	NCBI:103279572	CVI CM012323.1			Pseudoautosomal				VMN2R26							ENSACAG00000017518	GL343220.1	278176	Scaffold7769	6265	344	CM012323.1	109079619	442	scaffold291	114716	400	ULFQ01000594.1	54545	395
101508	ENSACAG00000009643	ENSEMBL:ENSACAG00000009643	Published as candidate W-linked	Vicoso_et_al_2013a:Dataset_S1(ENSACAG00000009643)	ZW Pair?	Pseudoautosomal		yes		VMN2R26							ENSACAG00000009643	GL343220.1	487856	Scaffold9606	6262	403	CM012323.1	109079634	452	scaffold1326	13889	416	ULFQ01000706.1	67193	414
101509	CYLD	HGNC:2584	CVI CM012323.1			Pseudoautosomal											ENSACAG00000009135	GL343220.1	729546	Scaffold8276	256144	153	CM012323.1	109099425	150	scaffold1131	242640	151	ULFQ01000370.1	371526	179
101510	NFATC4	HGNC:7778	CVI CM012323.1			Pseudoautosomal					ENSG00000100968	14	24365673				ENSACAG00000009230	GL343220.1	653220	Scaffold8276	198508	691	CM012323.1	109132489	679	scaffold1131	174801	672	ULFQ01000370.1	282089	674
101511	RIPK3	HGNC:10021	CVI CM012323.1			Pseudoautosomal					ENSG00000129465	14	24336021				ENSACAG00000025962	GL343220.1	631554	Scaffold8276	187257	113	CM012323.1	109166285	90	scaffold1131	163459	82	ULFQ01000370.1	265551	103
101512	ADCY4	HGNC:235	CVI CM012323.1			Pseudoautosomal					ENSG00000129467	14	24318349				ENSACAG00000009349	GL343220.1	543233	Scaffold8276	124581	886	CM012323.1	109210071	857	scaffold1131	77260	914	ULFQ01000370.1	94431	874
101513	LTB4R	HGNC:6713	CVI CM012323.1			Pseudoautosomal					ENSG00000213903	14	24311450				ENSACAG00000009617	GL343220.1	538077	Scaffold8276	119575	249	CM012323.1	109260498	240	scaffold1131	70254	236	ULFQ01000370.1	84686	240
101514	LTB4R2	HGNC:19260	CVI CM012323.1			Pseudoautosomal					ENSG00000213906	14	24305734	ENSGALG00000032348	16	21405	ENSACAG00000009620	GL343220.1	523846	Scaffold8276	44717	288	CM012323.1	109285646	275	scaffold1131	52395	278	ULFQ01000370.1	54915	284
101515	ENSACAG00000017527	ENSEMBL:ENSACAG00000017527	CVI CM012323.1			Pseudoautosomal				VMN2R26							ENSACAG00000017527	GL343220.1	187813	Scaffold20622	9631	242	CM012323.1	109380821	256	scaffold291	114719	245	ULFQ01000479.1	97442	245
101516	ENSACAG00000011059	ENSEMBL:ENSACAG00000011059	CVI CM012323.1			Pseudoautosomal				VMN2R26							ENSACAG00000011059	GL343253.1	1494201	Scaffold9829	27764	215	CM012323.1	109381769	218	scaffold1099	233711	220	ULFQ01000092.1	4146400	214
101517	ENSACAG00000005531	ENSEMBL:ENSACAG00000005531	Published as candidate W-linked	Vicoso_et_al_2013a:Dataset_S1(ENSACAG00000005531)	ZW Pair?	Pseudoautosomal		yes		VMN2R26							ENSACAG00000005531	GL343514.1	245059	Scaffold485	60137	206	CM012323.1	109433233	235	scaffold921	36230	223	ULFQ01000265.1	404435	204
101518	ENSACAG00000008049	ENSEMBL:ENSACAG00000008049	Published as candidate W-linked	Vicoso_et_al_2013a:Dataset_S1(ENSACAG00000008049)	ZW Pair?	Pseudoautosomal		yes		VMN2R26							ENSACAG00000008049	GL343253.1	1947801	Scaffold3752	500297	342	CM012323.1	109527232	396	scaffold391	343713	345	ULFQ01000492.1	103651	301
101519	ENSACAG00000027413	ENSEMBL:ENSACAG00000027413	CVI CM012323.1			Pseudoautosomal				VMN2R26							ENSACAG00000027413	GL343514.1	259870	Scaffold3752	461646	223	CM012323.1	109560070	280	scaffold1102	40903	235	ULFQ01000554.1	91726	226
101520	ENSACAG00000005529	ENSEMBL:ENSACAG00000005529	CVI CM012323.1			Pseudoautosomal				VMN2R26							ENSACAG00000005529	GL343514.1	299372	Scaffold566	1491	227	CM012323.1	109617149	284	scaffold391	129593	244	ULFQ01000554.1	65296	217
101521	ENSACAG00000002942	ENSEMBL:ENSACAG00000002942	CVI CM012323.1			Pseudoautosomal				VMN2R26							ENSACAG00000002942	GL343491.1	147953	Scaffold11998	11041	397	CM012323.1	109687926	464	scaffold677	33704	409	ULFQ01002186.1	9211	379
101522	ENSACAG00000011016	ENSEMBL:ENSACAG00000011016	CVI CM012323.1			Pseudoautosomal				VMN2R26							ENSACAG00000011016	GL343253.1	611004	Scaffold485	60128	284	CM012323.1	109753893	360	scaffold1227	1487	291	ULFQ01000479.1	31179	266
101523	ENSACAG00000007844	ENSEMBL:ENSACAG00000007844	CVI CM012323.1			Pseudoautosomal				VMN2R26							ENSACAG00000007844	GL343220.1	1586357	Scaffold17064	1284	305	CM012323.1	109784776	352	scaffold830	28815	292	ULFQ01000681.1	18314	291
101524	ENSACAG00000017516	ENSEMBL:ENSACAG00000017516	CVI CM012323.1			Pseudoautosomal				VMN2R26							ENSACAG00000017516	GL343220.1	361062	Scaffold11734	2212	367	CM012323.1	110080387	446	scaffold2292	1224	418	ULFQ01000479.1	10588	386
101525	ENSACAG00000017523	ENSEMBL:ENSACAG00000017523	Published as candidate W-linked	Vicoso_et_al_2013a:Dataset_S1(ENSACAG00000017523)	ZW Pair?	Pseudoautosomal		yes		VMN2R26							ENSACAG00000017523	GL343220.1	224999	Scaffold9829	42062	410	CM012323.1	110233070	462	scaffold943	30661	457	ULFQ01000690.1	44730	397
101526	ENSACAG00000009658	ENSEMBL:ENSACAG00000009658	Published as candidate W-linked	Vicoso_et_al_2013a:Dataset_S1(ENSACAG00000009658)	ZW Pair?	Pseudoautosomal		yes		VMN2R26							ENSACAG00000009658	GL343220.1	464786	Scaffold1745	48247	405	CM012323.1	110233091	476	scaffold1326	42561	445	ULFQ01000479.1	31149	430
101527	ENSACAG00000002917	ENSEMBL:ENSACAG00000002917	CVI CM012323.1			Pseudoautosomal				VMN2R26							ENSACAG00000002917	GL343491.1	159709	Scaffold6053	841	428	CM012323.1	110359462	446	scaffold1034	12894	385	ULFQ01002186.1	9223	335
101528	ENSACAG00000017528	ENSEMBL:ENSACAG00000017528	CVI CM012323.1			Pseudoautosomal				VMN2R26							ENSACAG00000017528	GL343220.1	149535	Scaffold3666	14921	479	CM012323.1	110756052	446	scaffold1227	1	390	ULFQ01006623.1	705	337
101529	ENSACAG00000017533	ENSEMBL:ENSACAG00000017533	CVI CM012323.1			Pseudoautosomal				VMN2R26							ENSACAG00000017533	GL343220.1	113517	Scaffold3752	511834	425	CM012323.1	110866045	387	scaffold1227	44060	388	ULFQ01000370.1	15627	341
101530	ADAT3	HGNC:25151	CVI CM012323.1			Pseudoautosomal					ENSG00000213638	19	1905378				ENSACAG00000017540	GL343220.1	79800	Scaffold3752	451790	230	CM012323.1	110893610	209	scaffold189	1091449	210	ULFQ01000211.1	7080	234
101531	DNAJC3	HGNC:9439	CVI CM012323.1			Pseudoautosomal											ENSACAG00000017545	GL343220.1	65313	Scaffold3752	437209	385	CM012323.1	110895901	365	scaffold189	1067367	382	ULFQ01000211.1	9976	383
101532	CLDN15	HGNC:2036	CVI CM012323.1			Pseudoautosomal					ENSG00000106404	7	101232092	ENSGALG00000038964	9	2659473	ENSACAG00000017570	GL343220.1	54351	Scaffold3752	423313	158	CM012323.1	110929801	92	scaffold189	1043751	153	ULFQ01000211.1	42498	155
101533	FIS1	HGNC:21689	CVI CM012323.1			Pseudoautosomal					ENSG00000214253	7	101239458				ENSACAG00000017589	GL343220.1	4000	Scaffold3752	386910	119	CM012323.1	110997622	61	scaffold189	985845	91	ULFQ01000211.1	117095	121
101534	ST8SIA6	HGNC:23317	NSC ULFQ01000211.1			Pseudoautosomal											ENSACAG00000004281	GL344165.1	19362	Scaffold3752	354525	103	CM012307.1	199527370	50	scaffold189	960709	104	ULFQ01000211.1	145767	84
101535	ZNHIT1	HGNC:21688	NSC ULFQ01000211.1			Pseudoautosomal					ENSG00000106400	7	101217668							Scaffold3752	326606	119	CM012306.1	88600626	82	scaffold189	912554	120	ULFQ01000211.1	216950	119
101536	PLOD3	HGNC:9083	NSC ULFQ01000211.1			Pseudoautosomal					ENSG00000106397	7	101205977				ENSACAG00000003968	GL343466.1	525	Scaffold3752	292324	629	CM012308.1	96316287	284	scaffold189	859823	578	ULFQ01000211.1	252943	630
101537	GPR4	HGNC:4497	DAC scaffold189			Pseudoautosomal											ENSACAG00000003293	GL343466.1	342647	Scaffold3752	5657	172	CM012311.1	68911587	165	scaffold189	409709	186	ULFQ01006796.1	4562	106
101538	HNRNPC	HGNC:5035	DAC scaffold189			Pseudoautosomal					ENSG00000092199	14	21209136				ENSACAG00000029093	GL343466.1	320960	Scaffold3752	20491	299	CM012311.1	68897923	162	scaffold189	427491	298	ULFQ01000843.1	474	298
101539	ZBED6	HGNC:33273	CVI CM012323.1			Pseudoautosomal											ENSACAG00000028545	GL343466.1	303433	Scaffold3752	41065	574	CM012323.1	111066280	526	scaffold189	462522	543	ULFQ01000211.1	721338	571
101540	H2BC1	HGNC:18730	CVI CM012323.1			Pseudoautosomal					ENSG00000146047	6	25726777	ENSGALG00000027571	1	48178033	ENSACAG00000003370	GL343466.1	265902	Scaffold3752	91170	125	CM012323.1	111105854	125	scaffold987	644772	124	ULFQ01000211.1	649066	125
101541	PFAS	HGNC:8863	CVI CM012323.1			Pseudoautosomal					ENSG00000178921	17	8247618	ENSGALG00000033643	AADN04001659.1	7382	ENSACAG00000003391	GL343466.1	207082	Scaffold3752	101432	1137	CM012323.1	111117238	984	scaffold189	537446	1133	ULFQ01000211.1	588504	1140
101542	ZP4	HGNC:15770	NSC ULFQ01000211.1			Pseudoautosomal					ENSG00000116996	1	237877864	ENSGALG00000005462	6	16560253	ENSACAG00000003547	GL343466.1	186207	Scaffold3752	135921	477	CM012307.1	5801269	249	scaffold189	597628	440	ULFQ01000211.1	546471	322
101543	RANGRF	HGNC:17679	NSC ULFQ01000211.1			Pseudoautosomal					ENSG00000108961	17	8288497				ENSACAG00000003563	GL343466.1	168780	Scaffold3752	157209	107	CM012307.1	5820002	73	scaffold189	625964	103	ULFQ01000211.1	532774	77
101544	ARHGEF15	HGNC:15590	CVI CM012323.1			Pseudoautosomal					ENSG00000198844	17	8310241				ENSACAG00000003870	GL343466.1	36161	Scaffold3752	270246	551	CM012323.1	111158849	213	scaffold189	823089	539	ULFQ01000211.1	292152	518
101545	HDLBP	HGNC:4857	CVI CM012323.1			Pseudoautosomal											ENSACAG00000003606	GL343466.1	105004	Scaffold3752	175326	1170	CM012323.1	111344268	998	scaffold189	660656	1194	ULFQ01000211.1	449569	1109
101546	LOC100564615	NCBI:100564615	CVI CM012323.1			Pseudoautosomal				OR							ENSACAG00000002989	GL343491.1	1833	Scaffold5699	87235	205	CM012323.1	111445025	190	scaffold169	135640	208	ULFQ01000265.1	665998	211
101547	OR10G7	HGNC:14842	CVI CM012323.1			Pseudoautosomal				OR	ENSG00000182634	11	124036013							Scaffold2789	231932	154	CM012323.1	111525613	171	scaffold863	112264	158	ULFQ01000389.1	139635	146
101548	ABHD4	HGNC:20154	CVI CM012323.1			Pseudoautosomal					ENSG00000100439	14	22598237				ENSACAG00000003019	GL343979.1	87482	Scaffold7289	19746	297	CM012323.1	111526107	138	scaffold169	188692	297	ULFQ01000677.1	88466	301
101549	DAD1	HGNC:2664	CVI CM012323.1			Pseudoautosomal					ENSG00000129562	14	22564905	ENSGALG00000035626	27	172244	ENSACAG00000003078	GL343979.1	72160	Scaffold7289	33966	117	CM012323.1	111534881	117	scaffold169	212259	116	ULFQ01000677.1	73285	117
101550	TRAC	HGNC:12029	CVI CM012323.1			Pseudoautosomal											ENSACAG00000029064	GL343979.1	47722	Scaffold7289	45177	37	CM012323.1	111545093	45	scaffold169	227545	38	ULFQ01000677.1	39422	51
101551	TRAV18	HGNC:12114	BCO Scaffold17590			Pseudoautosomal					ENSG00000211798	14	22003106				ENSACAG00000002837	GL343466.1	567390	Scaffold17590	24319	25							ULFQ01000776.1	6469	29
101552	TRAV16	HGNC:12112	CVI CM012323.1			Pseudoautosomal					ENSG00000211796	14	21990496				ENSACAG00000029665	GL343466.1	599983	Scaffold17590	26537	32	CM012323.1	111648626	28	scaffold169	352828	34	ULFQ01008356.1	1736	38
101553	OR10D3	HGNC:8168	CVI CM012323.1			Pseudoautosomal				OR	ENSG00000197309	11	124183345							Scaffold2789	231929	169	CM012323.1	111682316	172	scaffold189	37503	166	ULFQ01044619.1	164	135
101554	OR10G4	HGNC:14809	CVI CM012323.1			Pseudoautosomal				OR	ENSG00000254737	11	124012997							Scaffold2789	270064	151	CM012323.1	111689923	164	scaffold863	112258	155	ULFQ01000389.1	139635	143
101555	OR10G2	HGNC:8170	CVI CM012323.1			Pseudoautosomal				OR	ENSG00000255582	14	21633836							Scaffold16463	9803	152	CM012323.1	111689932	173	scaffold863	18852	161	ULFQ01000389.1	263329	150
101556	OR10G6	HGNC:14836	CVI CM012323.1			Pseudoautosomal				OR	ENSG00000198674	11	123994163							Scaffold16463	9803	197	CM012323.1	111760681	193	scaffold863	18852	199	ULFQ01000389.1	139644	192
101557	OR4E1	HGNC:8296	CVI CM012323.1			Pseudoautosomal				OR	ENSG00000276240	14	21667940				ENSACAG00000002843	GL343466.1	534859	Scaffold2789	208720	259	CM012323.1	111936938	259	scaffold189	56725	258	ULFQ01000211.1	1168506	265
101558	OR4K14	HGNC:15352	CVI CM012323.1			Pseudoautosomal				OR	ENSG00000169484	14	20014143							Scaffold15251	788	153	CM012323.1	111947361	157	scaffold506	738397	149	ULFQ01000442.1	200670	169
101559	OR4E2	HGNC:8297	CVI CM012323.1			Pseudoautosomal				OR	ENSG00000221977	14	21653835							Scaffold2789	218964	181	CM012323.1	111947379	197	scaffold189	65527	198	ULFQ01000211.1	1164298	193
101560	SALL2	HGNC:10526	CVI CM012323.1			Pseudoautosomal					ENSG00000165821	14	21521081	ENSGALG00000042066	AADN04016442.1	2341	ENSACAG00000000030	AAWZ02041297	1011	Scaffold2789	164587	493	CM012323.1	111984993	476	scaffold189	107628	460	ULFQ01001775.1	3680	451
101561	METTL3	HGNC:17563	CVI CM012323.1			Pseudoautosomal					ENSG00000165819	14	21498133	ENSGALG00000029952	AADN04017089.1	651	ENSACAG00000002851	GL343466.1	480366	Scaffold2789	147675	535	CM012323.1	111998030	254	scaffold189	119603	529	ULFQ01000211.1	1052526	526
101562	ENSACAG00000002902	ENSEMBL:ENSACAG00000002902	CVI CM012323.1			Pseudoautosomal				VMN2R26							ENSACAG00000002902	GL343491.1	214827	Scaffold6053	862	405	CM012323.1	112024678	441	scaffold1269	54927	414	ULFQ01001025.1	27235	374
101563	ENSACAG00000028352	ENSEMBL:ENSACAG00000028352	CVI CM012323.1			Pseudoautosomal				IGHV				ENSGALG00000027010	27	318725	ENSACAG00000028352	GL343491.1	309396	Scaffold2753	84870	81	CM012323.1	112057106	80	scaffold1466	23245	80	ULFQ01000265.1	66946	81
101564	ENSACAG00000002854	ENSEMBL:ENSACAG00000002854	Published as candidate W-linked	Vicoso_et_al_2013a:Dataset_S1(ENSACAG00000002854)	ZW Pair?	Pseudoautosomal			yes	IGHV							ENSACAG00000002854	GL344186.1	32680	Scaffold7628	12485	146	CM012323.1	112057112	150	scaffold1269	18954	149	ULFQ01000265.1	36809	111
101565	ENSACAG00000025794	ENSEMBL:ENSACAG00000025794	CVI CM012323.1			Pseudoautosomal				IGHV							ENSACAG00000025794	GL343491.1	253209	Scaffold7628	12470	139	CM012323.1	112062326	135	scaffold1269	18939	146	ULFQ01000265.1	846	118
101566	AC233755.2	ENSEMBL	CVI CM012323.1			Pseudoautosomal				IGHV	ENSG00000277856	KI270726.1	26241							Scaffold7628	486	75	CM012323.1	112074155	74	scaffold635	82814	76	ULFQ01000265.1	66985	75
101567	AC141272.1	ENSEMBL	NSC ULFQ01000614.1			Pseudoautosomal				IGHV	ENSG00000277836	KI270728.1	1270984	ENSGALG00000038257	KQ759533.1	54110	ENSACAG00000002835	GL344186.1	55541	Scaffold7628	486	71	CM012313.1	7094493	74	scaffold635	145322	76	ULFQ01000614.1	246	75
101568	ENSACAG00000002835	ENSEMBL:ENSACAG00000002835	NSC ULFQ01000614.1			Pseudoautosomal				IGHV				ENSGALG00000042285	KQ759533.1	2573	ENSACAG00000002835	GL344186.1	55541	Scaffold2753	9688	66	CM012313.1	7063878	66	scaffold635	29208	72	ULFQ01000614.1	22382	65
101569	ENSACAG00000026037	ENSEMBL:ENSACAG00000026037	CVI CM012323.1			Pseudoautosomal				IGHV				ENSGALG00000032301	KQ759533.1	26122	ENSACAG00000026037	GL344186.1	11355	Scaffold7628	62040	71	CM012323.1	112074161	73	scaffold635	145270	81	ULFQ01000614.1	45558	79
101570	ENSACAG00000002908	ENSEMBL:ENSACAG00000002908	Published as candidate W-linked	Vicoso_et_al_2013a:Dataset_S1(ENSACAG00000002908)	ZW Pair?	Pseudoautosomal			yes	IGHV				ENSGALG00000032301	KQ759533.1	26122	ENSACAG00000002908	GL343491.1	183853	Scaffold5562	4836	95	CM012323.1	112087489	91	scaffold1466	20500	94	ULFQ01000614.1	88088	91
101571	ENSACAG00000002907	ENSEMBL:ENSACAG00000002907	CVI CM012323.1			Pseudoautosomal				IGHV				ENSGALG00000032301	KQ759533.1	26122	ENSACAG00000002907	GL343491.1	199679	Scaffold5562	4854	75	CM012323.1	112133049	81	scaffold635	163530	77	ULFQ01000614.1	88106	82
101572	ENSACAG00000021075	ENSEMBL:ENSACAG00000021075	NSC ULFQ01000614.1	Vicoso_et_al_2013a:Dataset_S1(ENSACAG00000021075)	ZW Pair?	Pseudoautosomal		yes		IGHV				ENSGALG00000032301	KQ759533.1	26122	ENSACAG00000021075	GL343491.1	192351	Scaffold5562	4836	81	CM012313.1	7113264	82	scaffold635	66183	79	ULFQ01000614.1	108500	83
101573	ENSACAG00000027744	ENSEMBL:ENSACAG00000027744	NSC ULFQ01000581.1			Pseudoautosomal				IGHV							ENSACAG00000027744	GL344186.1	35138				PDHV02003370.1	1137	20	scaffold1269	19168	20	ULFQ01000581.1	118896	20
101574	ENSACAG00000002852	ENSEMBL:ENSACAG00000002852	NSC ULFQ01000581.1			Pseudoautosomal				IGHV							ENSACAG00000002852	AAWZ02040808	1558	Scaffold7628	3173	81	PDHV02000397.1	277	111	scaffold1269	10789	142	ULFQ01000581.1	71092	151
101575	ENSACAG00000028297	ENSEMBL:ENSACAG00000028297	CVI CM012323.1			Pseudoautosomal				IGHV							ENSACAG00000028297	GL343491.1	57157	Scaffold9029	12	61	CM012323.1	112147019	75	scaffold1269	18942	77	ULFQ01000581.1	71083	74
101576	ENSACAG00000028838	ENSEMBL:ENSACAG00000028838	NSC ULFQ01000581.1			Pseudoautosomal				IGHV							ENSACAG00000028838	GL344845.1	8596	Scaffold7628	12470	69	PDHV02000397.1	265	72	scaffold1269	18939	79	ULFQ01000581.1	71080	78
101577	ENSACAG00000021136	ENSEMBL:ENSACAG00000021136	NSC ULFQ01000581.1			Pseudoautosomal				IGHV							ENSACAG00000021136	GL344186.1	1657	Scaffold7628	12464	70	PDHV02000397.1	265	69	scaffold1269	18939	77	ULFQ01000581.1	71074	80
101578	ENSACAG00000002838	ENSEMBL:ENSACAG00000002838	Published as candidate W-linked	Vicoso_et_al_2013a:Dataset_S1(ENSACAG00000002838)	ZW Pair?	Pseudoautosomal			yes	IGHV				ENSGALG00000032301	KQ759533.1	26122	ENSACAG00000002838	GL343491.1	327041	Scaffold2753	88933	153	CM012323.1	112163650	152	scaffold635	2603	157	ULFQ01000265.1	33750	156
101579	ENSACAG00000026924	ENSEMBL:ENSACAG00000026924	CVI CM012323.1			Pseudoautosomal				IGHV							ENSACAG00000026924	AAWZ02041295	4049	Scaffold7628	12449	62	CM012323.1	112166590	63	scaffold7993	85	77	ULFQ01000581.1	71059	77
101580	ENSACAG00000002831	ENSEMBL:ENSACAG00000002831	NSC ULFQ01000581.1			Pseudoautosomal				IGHV							ENSACAG00000002831	GL343491.1	313721	Scaffold7628	12443	76	PDHV02000397.1	262	77	scaffold7993	73	86	ULFQ01000581.1	29585	91
101581	IGHV2-26	HGNC:5575	CVI CM012323.1			Pseudoautosomal				IGHV	ENSG00000211951	14	106301396				ENSACAG00000002836	GL343491.1	338024	Scaffold26038	499	36	CM012323.1	112172923	58	scaffold635	232796	54	ULFQ01000265.1	121894	38
101582	AC136616.2	ENSEMBL	CVI CM012323.1			Pseudoautosomal				IGHV	ENSG00000277761	KI270728.1	1167457							Scaffold2753	88915	69	CM012323.1	112194864	71	scaffold635	24990	76	ULFQ01000614.1	45546	72
101583	ENSACAG00000002383	ENSEMBL:ENSACAG00000002383	CVI CM012323.1			Pseudoautosomal				IGHV				ENSGALG00000027010	27	318725	ENSACAG00000002383	AAWZ02041188	708	Scaffold2753	84873	160	CM012323.1	112198728	163	scaffold635	2606	158	ULFQ01000265.1	139981	159
101584	IGHV6-1	HGNC:5662	CVI CM012323.1			Pseudoautosomal				IGHV	ENSG00000211933	14	105939756				ENSACAG00000005212	GL344186.1	60737	Scaffold7628	5410	37	CM012323.1	112206105	44	scaffold1269	609	53	ULFQ01000581.1	130547	50
101585	ENSACAG00000023814	ENSEMBL:ENSACAG00000023814	Published as candidate W-linked	Vicoso_et_al_2013a:Dataset_S1(ENSACAG00000023814)	ZW Pair?	Pseudoautosomal			yes	IGHV				ENSGALG00000032301	KQ759533.1	26122	ENSACAG00000023814	GL344186.1	39222	Scaffold7628	62052	70	CM012323.1	112208207	68	scaffold635	73056	71	ULFQ01000265.1	38715	67
101586	IGHV6-1	HGNC:5662	CVI CM012323.1			Pseudoautosomal				IGHV	ENSG00000211933	14	105939756				ENSACAG00000002864	GL343491.1	238324	Scaffold2753	53110	32	CM012323.1	112213333	45	scaffold1269	606	54	ULFQ01000581.1	130547	50
101587	LOC100567165	NCBI:100567165	CVI CM012323.1			Pseudoautosomal				VMN2R26							ENSACAG00000002870	GL343491.1	226365	Scaffold6053	862	353	CM012323.1	112224478	359	scaffold1269	39268	338	ULFQ01001025.1	27235	322
101588	ENSACAG00000009626	ENSEMBL:ENSACAG00000009626	CVI CM012323.1			Pseudoautosomal				VMN2R26							ENSACAG00000009626	GL343220.1	505006	Scaffold8276	73915	381	CM012323.1	112224505	431	scaffold1227	44048	399	ULFQ01000370.1	15618	410
101589	ENSACAG00000028659	ENSEMBL:ENSACAG00000028659	CVI CM012323.1			Pseudoautosomal				IGHV							ENSACAG00000028659	GL343491.1	125101	Scaffold7628	5404	68	CM012323.1	112237627	72	scaffold1269	18903	78	ULFQ01000581.1	145783	76
101590	ENSACAG00000029467	ENSEMBL:ENSACAG00000029467	NSC ULFQ01000581.1			Pseudoautosomal				IGHV							ENSACAG00000029467	GL343491.1	63081	Scaffold7628	5413	62	PDHV02000397.1	265	71	scaffold1269	18942	79	ULFQ01000581.1	145822	74
101591	ENSACAG00000021119	ENSEMBL:ENSACAG00000021119	NSC ULFQ01000581.1			Pseudoautosomal				IGHV							ENSACAG00000021119	AAWZ02037858	7169	Scaffold2753	24974	34	PDHV02000397.1	265	67	scaffold7749	2531	70	ULFQ01000581.1	145822	69
101592	ENSACAG00000026766	ENSEMBL:ENSACAG00000026766	CVI CM012323.1			Pseudoautosomal				IGHV				ENSGALG00000032301	KQ759533.1	26122	ENSACAG00000026766	GL344186.1	28915	Scaffold7628	62040	72	CM012323.1	112253339	70	scaffold635	2600	76	ULFQ01004192.1	3799	71
101593	ENSACAG00000009673	ENSEMBL:ENSACAG00000009673	CVI CM012323.1			Pseudoautosomal				VMN2R26							ENSACAG00000009673	GL343491.1	172861	Scaffold7859	4488	442	CM012323.1	112284724	441	scaffold1521	10533	406	ULFQ01001552.1	809	390
101594	IGHV6-1	HGNC:5662	CVI CM012323.1			Pseudoautosomal				IGHV	ENSG00000211933	14	105939756				ENSACAG00000022955	GL344186.1	71563	Scaffold2753	53110	32	CM012323.1	112452825	27	scaffold1269	609	53	ULFQ01000581.1	130547	50
101595	IGHV6-1	HGNC:5662	CVI CM012323.1			Pseudoautosomal				IGHV	ENSG00000211933	14	105939756				ENSACAG00000020946	GL343491.1	248421	Scaffold7628	20361	71	CM012323.1	112457950	70	scaffold1034	23967	69	ULFQ01001173.1	24673	67
101596	ENSACAG00000024548	ENSEMBL:ENSACAG00000024548	CVI CM012323.1			Pseudoautosomal				IGHV							ENSACAG00000024548	GL343491.1	461752	Scaffold10285	53256	237	CM012323.1	112843044	116	scaffold1273	9736	124	ULFQ01001698.1	9140	111
101597	ENSACAG00000023622	ENSEMBL:ENSACAG00000023622	CVI CM012323.1			Pseudoautosomal				IGHV							ENSACAG00000023622	GL343491.1	485127	Scaffold10285	88624	133	CM012323.1	112900770	121	scaffold1752	79400	105	ULFQ01000510.1	127040	151
101598	IGHM	HGNC:5541	CVI CM012323.1			Pseudoautosomal				IGHV	ENSG00000211899	14	105851705				ENSACAG00000000812	GL343491.1	399288	Scaffold10285	110421	130	CM012323.1	112956907	125	scaffold1752	114161	98	ULFQ01000510.1	99310	136
101599	ENSACAG00000028269	ENSEMBL:ENSACAG00000028269	CVI CM012323.1			Pseudoautosomal				IGHV							ENSACAG00000028269	GL343491.1	51079	Scaffold2753	30930	38	CM012323.1	112960828	91	scaffold635	154011	78	ULFQ01000265.1	68209	45
101600	IGHV6-1	HGNC:5662	CVI CM012323.1			Pseudoautosomal				IGHV	ENSG00000211933	14	105939756				ENSACAG00000028727	GL343491.1	370976	Scaffold2753	28975	53	CM012323.1	113001563	63	scaffold1269	609	53	ULFQ01000581.1	130547	50
101601	ENSACAG00000000219	ENSEMBL:ENSACAG00000000219	CVI CM012323.1			Pseudoautosomal				IGHV							ENSACAG00000000219	AAWZ02037858	5475	Scaffold2753	27855	40	CM012323.1	113001566	65	scaffold635	232790	43	ULFQ01000265.1	858	34
101602	IGHV2-5	HGNC:5576	CVI CM012323.1			Pseudoautosomal				IGHV	ENSG00000211937	14	106037902				ENSACAG00000002836	GL343491.1	338024	Scaffold26038	499	36	CM012323.1	113001575	53	scaffold635	54745	45	ULFQ01000265.1	121894	38
101603	IGHV6-1	HGNC:5662	CVI CM012323.1			Pseudoautosomal				IGHV	ENSG00000211933	14	105939756	ENSGALG00000040159	10	599661	ENSACAG00000002912	GL343491.1	187770	Scaffold2753	33675	75	CM012323.1	113009072	80	scaffold635	201861	71	ULFQ01000265.1	264072	74
101604	ENSACAG00000021047	ENSEMBL:ENSACAG00000021047	CVI CM012323.1			Pseudoautosomal				IGHV							ENSACAG00000021047	GL343491.1	405382				CM012323.1	113029796	50	scaffold635	251123	39
101605	ENSACAG00000002982	ENSEMBL:ENSACAG00000002982	CVI CM012323.1			Pseudoautosomal				IGHV							ENSACAG00000002982	GL343491.1	82062	Scaffold53779	300	52	CM012323.1	113031770	72	scaffold6225	149	69	ULFQ01000265.1	107762	55
101606	ENSACAG00000000223	ENSEMBL:ENSACAG00000000223	CVI CM012323.1			Pseudoautosomal				IGHV							ENSACAG00000000223	GL343491.1	60841	Scaffold28507	2772	45	CM012323.1	113038259	81	scaffold635	54694	85	ULFQ01000265.1	112574	49
101607	ENSACAG00000002980	ENSEMBL:ENSACAG00000002980	CVI CM012323.1			Pseudoautosomal				IGHV							ENSACAG00000002980	GL343491.1	103391	Scaffold2753	21326	57	CM012323.1	113038262	87	scaffold6225	4	81	ULFQ01000265.1	107795	63
101608	IGHV2-70	HGNC:5577	CVI CM012323.1			Pseudoautosomal				IGHV	ENSG00000274576	14	106770577				ENSACAG00000002836	GL343491.1	338024	Scaffold7628	5419	38	CM012323.1	113042116	44	scaffold635	54745	45	ULFQ01000265.1	121894	38
101609	ENSACAG00000002972	ENSEMBL:ENSACAG00000002972	CVI CM012323.1			Pseudoautosomal				IGHV							ENSACAG00000002972	GL343491.1	106357	Scaffold2753	27852	50	CM012323.1	113045994	81	scaffold6225	1	75	ULFQ01000265.1	112628	55
101610	IGHV6-1	HGNC:5662	CVI CM012323.1			Pseudoautosomal				IGHV	ENSG00000211933	14	105939756				ENSACAG00000023684	GL343491.1	411361	Scaffold2753	53110	32	CM012323.1	113048018	43	scaffold1269	609	53	ULFQ01000581.1	130547	50
101611	LOC102723407	NCBI:102723407	CVI CM012323.1			Pseudoautosomal				IGHV	ENSG00000275063	KI270726.1	41444							Scaffold2753	30957	39	CM012323.1	113048024	56	scaffold635	151293	65	ULFQ01000265.1	331491	39
101612	IGHV2OR16-5	HGNC:5579	CVI CM012323.1			Pseudoautosomal				IGHV	ENSG00000259303	16	32847713				ENSACAG00000002836	GL343491.1	338024	Scaffold7628	5422	37	CM012323.1	113048430	39	scaffold635	54745	45	ULFQ01000265.1	121894	38
101613	ENSACAG00000028477	ENSEMBL:ENSACAG00000028477	CVI CM012323.1			Pseudoautosomal				IGHV							ENSACAG00000028477	GL343491.1	108746	Scaffold40000	2	41	CM012323.1	113053233	52	scaffold635	47515	38	ULFQ01000614.1	108515	35
101614	IGHV5-51	HGNC:5659	CVI CM012323.1			Pseudoautosomal				IGHV	ENSG00000211966	14	106578744				ENSACAG00000025737	GL343491.1	38006	Scaffold2753	14851	67	CM012323.1	113082196	72	scaffold635	66198	65	ULFQ01000614.1	28721	57
101615	OR6X1	HGNC:14737	CVI CM012323.1			Pseudoautosomal				OR	ENSG00000221931	11	123753488							Scaffold2753	1422	173	CM012323.1	113097840	156	scaffold411	30783	167	ULFQ01000265.1	479267	161
101616	PC	HGNC:8636	CVI CM012323.1			Pseudoautosomal					ENSG00000173599	11	66848233	ENSGALG00000041807	AADN04008201.1	550	ENSACAG00000006309	GL344355.1	2439	Scaffold2363	673420	992	CM012323.1	113199131	862	scaffold562	20533	1007	ULFQ01000266.1	209115	880
101617	LRFN4	HGNC:28456	CVI CM012323.1			Pseudoautosomal					ENSG00000173621	11	66856647							Scaffold2363	719810	226	CM012323.1	113338170	309	scaffold562	57355	317	ULFQ01000266.1	233291	272
101618	BCAN	HGNC:23059	CVI CM012323.1			Pseudoautosomal					ENSG00000132692	1	156641390	ENSGALG00000045469	25	1478428	ENSACAG00000004876	AAWZ02037112	2066	Scaffold2363	550936	395	CM012323.1	113362464	388	scaffold562	183900	343	ULFQ01000266.1	322608	364
101619	HAPLN2	HGNC:17410	CVI CM012323.1			Pseudoautosomal					ENSG00000132702	1	156619294	ENSGALG00000013234	25	1487086				Scaffold2363	544460	222	CM012323.1	113379154	218	scaffold562	201215	217	ULFQ01000266.1	339602	217
101620	RHBG	HGNC:14572	CVI CM012323.1			Pseudoautosomal					ENSG00000132677	1	156369212	ENSGALG00000013232	25	1490889				Scaffold2363	512447	264	CM012323.1	113390911	208	scaffold750	1760066	150	ULFQ01000266.1	353372	193
101621	MEF2D	HGNC:6997	NSC ULFQ01000266.1			Pseudoautosomal					ENSG00000116604	1	156463727	ENSGALG00000037787	25	1557867				Scaffold2363	419527	441	CM012315.1	274630	285	scaffold562	264353	400	ULFQ01000266.1	397251	361
101622	IQGAP3	HGNC:20669	CVI CM012323.1			Pseudoautosomal					ENSG00000183856	1	156525405	ENSGALG00000043276	AADN04015762.1	510				Scaffold2363	233824	765	CM012323.1	113521394	640	scaffold562	369523	690	ULFQ01000232.1	235637	544
101623	NAXE	HGNC:18453	CVI CM012323.1			Pseudoautosomal					ENSG00000163382	1	156591762	ENSGALG00000046023	25	224373	ENSACAG00000027313	GL345062.1	1975	Scaffold2363	301742	210	CM012323.1	113551139	186	scaffold562	260011	202	ULFQ01000266.1	514437	183
101624	UBQLN4	HGNC:1237	CVI CM012323.1			Pseudoautosomal					ENSG00000160803	1	156035301	ENSGALG00000042214	25	804221				Scaffold2363	289066	458	CM012323.1	113556929	430	scaffold562	405497	363	ULFQ01000266.1	520402	436
101625	LAMTOR2	HGNC:29796	CVI CM012323.1			Pseudoautosomal					ENSG00000116586	1	156054752	ENSGALG00000029881	25	815282				Scaffold2363	283897	99	CM012323.1	113564925	120	scaffold562	413852	120	ULFQ01000266.1	529684	124
101626	RAB25	HGNC:18238	CVI CM012323.1			Pseudoautosomal					ENSG00000132698	1	156061160	ENSGALG00000029812	25	818507				Scaffold2363	266987	154	CM012323.1	113579812	154	scaffold562	373637	160	ULFQ01025627.1	120	146
101627	RAB2B	HGNC:20246	CVI CM012323.1			Pseudoautosomal								ENSGALG00000037802	25	825756				Scaffold2363	251274	151	CM012323.1	113590495	148	scaffold562	436699	149	ULFQ01000266.1	552626	151
101628	MEX3A	HGNC:33482	CVI CM012323.1			Pseudoautosomal					ENSG00000254726	1	156072013	ENSGALG00000014016	25	247602	ENSACAG00000003739	AAWZ02037012	2118	Scaffold2363	121178	411	CM012323.1	113624387	361	scaffold562	487616	374	ULFQ01000266.1	577886	386
[truncated: 20 more rows]
