# Supplementary material for: Dosage-sensitive functions in embryonic development drove the survival of genes on sex-specific chromosomes in snakes, birds, and mammals
Source: HighWire-hosted journal article supplement (doi:10.1101/gr.268516.120), 2021-01-21
Supplement: Supplemental_Table_S4.xlsx [file Supplemental_Table_S4.xlsx]

## Sheet: Sheet1
Supplemental Table S4. Published ancestral caenophidian Z-W pairs.
Gene	Acrochordus arafurae	Deinagkistrodon acutus	Protobothrops flavoviridis	Gloydius blomhoffii	Crotalus horridus	Sistrurus miliarius	Thamnophis elegans	Thamnophis sirtalis	Rhabdophis tigrinus tigrinus	Elaphe quadrivirgata	Pantherophis guttatus	Lycodon semicarinatus	Naja kaouthia
AP2A1	-	(Yin et al. 2016)	-	-	-	-	(Vicoso et al. 2013a),(Yin et al. 2016)	-	-	-	-	-	-
ARF1	-	-	-	-	-	(Vicoso et al. 2013a)	-	-	-	-	-	-	-
BMI1	-	(Yin et al. 2016)	-	-	-	(Vicoso et al. 2013a)	(Vicoso et al. 2013a),(Yin et al. 2016)	-	-	-	-	-	-
BRCA1	-	-	-	-	-	(Vicoso et al. 2013a)	-	-	-	-	-	-	-
CBX1	-	-	-	-	-	(Vicoso et al. 2013a)	-	-	-	-	-	-	-
CDC27	-	-	-	-	-	(Vicoso et al. 2013a)	-	-	-	-	-	-	-
CDK12	-	(Yin et al. 2016)	-	-	-	(Vicoso et al. 2013a),(Yin et al. 2016)	-	-	-	-	-	-	-
CDK13	-	(Yin et al. 2016)	-	-	-	-	(Yin et al. 2016)	-	-	-	-	-	-
COL1A1	-	-	-	-	-	(Vicoso et al. 2013a)	-	-	-	-	-	-	-
COMMD3	-	(Yin et al. 2016)	-	-	(Perry et al. 2018)	(Vicoso et al. 2013a),(Yin et al. 2016)	(Vicoso et al. 2013a),(Yin et al. 2016)	(Perry et al. 2018)	-	-	(Perry et al. 2018)	-	-
CNTNAP1	-	-	-	-	-	-	(Yin et al. 2016)	-	-	-	-	-	-
CTNNB1	(Matsubara et al. 2016)	-	(Matsubara et al. 2016)	(Matsubara et al. 2016)	(Perry et al. 2018)	(Vicoso et al. 2013a)	-	(Matsubara et al. 2016),(Perry et al. 2018)	(Matsubara et al. 2016)	(Matsubara et al. 2006),(Matsubara et al. 2016)	(Perry et al. 2018)	(Matsubara et al. 2016)	(Matsubara et al. 2016)
CUL2	-	(Yin et al. 2016)	-	-	-	-	(Vicoso et al. 2013a),(Yin et al. 2016)	-	-	-	-	-	-
DCAF7	-	-	-	-	-	-	(Vicoso et al. 2013a)	-	-	-	-	-	-
DDX42	-	-	-	-	-	(Vicoso et al. 2013a)	-	-	-	-	-	-	-
DLX3	-	-	-	-	-	(Vicoso et al. 2013a)	-	-	-	-	-	-	-
DLX4	-	-	-	-	-	(Vicoso et al. 2013a)	-	-	-	-	-	-	-
DNAJB6	-	-	-	-	-	-	(Vicoso et al. 2013a)	-	-	-	-	-	-
EPC1	-	(Yin et al. 2016)	-	-	-	(Vicoso et al. 2013a)	(Vicoso et al. 2013a),(Yin et al. 2016)	-	-	-	-	-	-
EZH1	-	(Yin et al. 2016)	-	-	-	-	(Yin et al. 2016)	-	-	-	-	-	-
EZH2	-	-	-	-	-	(Vicoso et al. 2013a)	(Vicoso et al. 2013a)	-	-	-	-	-	-
FAM171A2	-	-	-	-	-	(Vicoso et al. 2013a)	-	-	-	-	-	-	-
FBXL20	-	(Yin et al. 2016)	-	-	-	(Vicoso et al. 2013a)	-	-	-	-	-	-	-
FUZ	-	(Yin et al. 2016)	-	-	-	(Vicoso et al. 2013a),(Yin et al. 2016)	(Vicoso et al. 2013a)	-	-	-	-	-	-
GORASP1	-	-	-	-	-	-	(Vicoso et al. 2013a)	-	-	-	-	-	-
HDAC5	-	-	-	-	-	(Vicoso et al. 2013a)	-	-	-	-	-	-	-
HEXIM1	-	-	-	-	-	(Vicoso et al. 2013a)	-	-	-	-	-	-	-
IGF2BP1	-	-	-	-	-	(Vicoso et al. 2013a)	-	-	-	-	-	-	-
ITGA3	-	-	-	-	-	(Vicoso et al. 2013a)	-	-	-	-	-	-	-
JUP	-	-	-	-	-	(Vicoso et al. 2013a)	-	-	-	-	-	-	-
KANSL1	-	(Yin et al. 2016)	-	-	-	(Vicoso et al. 2013a),(Yin et al. 2016)	(Yin et al. 2016)	-	-	-	-	-	-
KAT7	-	(Yin et al. 2016)	-	-	-	(Vicoso et al. 2013a),(Yin et al. 2016)	-	-	-	-	-	-	-
KIF5B	-	-	-	-	-	-	(Vicoso et al. 2013a)	-	-	-	-	-	-
KLF6	-	(Yin et al. 2016)	-	-	-	(Yin et al. 2016)	(Vicoso et al. 2013a)	-	-	-	-	-	-
KPNB1	-	(Yin et al. 2016)	-	-	-	(Vicoso et al. 2013a),(Yin et al. 2016)	(Vicoso et al. 2013a),(Yin et al. 2016)	-	-	-	-	-	-
LARP4B	-	-	-	-	-	(Vicoso et al. 2013a)	-	-	-	-	-	-	-
LASP1	-	(Yin et al. 2016)	-	-	-	(Vicoso et al. 2013a),(Yin et al. 2016)	-	-	-	-	-	-	-
LSM12	-	-	-	-	(Perry et al. 2018)	(Vicoso et al. 2013a)	(Vicoso et al. 2013a)	(Perry et al. 2018)	-	-	(Perry et al. 2018)	-	-
MAPT	-	-	-	-	-	-	(Vicoso et al. 2013a)	-	-	-	-	-	-
MSL1	-	(Yin et al. 2016)	-	-	(Perry et al. 2018)	(Vicoso et al. 2013a),(Yin et al. 2016)	(Vicoso et al. 2013a),(Yin et al. 2016)	(Perry et al. 2018)	-	-	(Perry et al. 2018)	-	-
NFE2L1	-	(Yin et al. 2016)	-	-	-	(Vicoso et al. 2013a),(Yin et al. 2016)	-	-	-	-	-	-	-
NMT1	-	(Yin et al. 2016)	-	-	-	(Vicoso et al. 2013a)	-	-	-	-	-	-	-
NPEPPS	-	-	-	-	-	(Vicoso et al. 2013a)	-	-	-	-	-	-	-
NR1D1	-	-	-	-	-	-	(Vicoso et al. 2013a)	-	-	-	-	-	-
NSF	-	-	-	-	-	(Vicoso et al. 2013a)	-	-	-	-	-	-	-
PIP4K2B	-	-	-	-	-	(Vicoso et al. 2013a)	-	-	-	-	-	-	-
PRR12	-	-	-	-	-	(Vicoso et al. 2013a)	-	-	-	-	-	-	-
PSMA2	-	-	-	-	-	(Vicoso et al. 2013a)	-	-	-	-	-	-	-
PSMD11	-	(Yin et al. 2016)	-	-	-	(Vicoso et al. 2013a),(Yin et al. 2016)	(Vicoso et al. 2013a)	-	-	-	-	-	-
PSMD3	-	(Yin et al. 2016)	-	-	-	(Vicoso et al. 2013a)	(Yin et al. 2016)	-	-	-	-	-	-
PSME3	-	(Yin et al. 2016)	-	-	-	(Vicoso et al. 2013a),(Yin et al. 2016)	-	-	-	-	-	-	-
PTF1A	-	(Yin et al. 2016)	-	-	-	-	-	-	-	-	-	-	-
RAB5A	-	-	-	-	-	-	-	-	-	(Matsubara et al. 2006)	-	-	-
RARA	-	-	-	-	-	(Vicoso et al. 2013a)	-	-	-	-	-	-	-
RBM33	-	-	-	-	-	(Vicoso et al. 2013a)	(Vicoso et al. 2013a)	-	-	-	-	-	-
RRAS	-	-	-	-	-	(Vicoso et al. 2013a)	-	-	-	-	-	-	-
RUNDC3A	-	(Yin et al. 2016)	-	-	-	(Vicoso et al. 2013a),(Yin et al. 2016)	-	-	-	-	-	-	-
SCAF1	-	(Yin et al. 2016)	-	-	-	(Vicoso et al. 2013a),(Yin et al. 2016)	-	-	-	-	-	-	-
SEPTIN7	-	-	-	-	-	(Vicoso et al. 2013a)	-	-	-	-	-	-	-
SLC25A39	-	-	-	-	-	(Vicoso et al. 2013a)	-	-	-	-	-	-	-
SNRNP70	-	(Yin et al. 2016)	-	-	-	-	(Vicoso et al. 2013a),(Yin et al. 2016)	-	-	-	-	-	-
SOCS7	-	-	-	-	-	-	(Vicoso et al. 2013a)	-	-	-	-	-	-
SP2	-	(Yin et al. 2016)	-	-	-	(Vicoso et al. 2013a)	(Vicoso et al. 2013a),(Yin et al. 2016)	-	-	-	-	-	-
SP4	-	(Yin et al. 2016)	-	-	-	-	(Yin et al. 2016)	-	-	-	-	-	-
SPOP	-	-	-	-	-	(Vicoso et al. 2013a)	-	-	-	-	-	-	-
STAT5B	-	-	-	-	-	(Vicoso et al. 2013a)	(Vicoso et al. 2013a)	-	-	-	-	-	-
STT3B	-	(Yin et al. 2016)	-	-	-	(Yin et al. 2016)	-	-	-	-	-	-	-
TLK2	-	-	-	-	-	(Vicoso et al. 2013a)	(Vicoso et al. 2013a)	-	-	-	-	-	-
TOP2A	-	-	-	-	-	-	(Vicoso et al. 2013a)	-	-	-	-	-	-
TRA2A	-	-	-	-	-	(Vicoso et al. 2013a)	-	-	-	-	-	-	-
UBE2M	-	-	-	-	-	(Vicoso et al. 2013a)	-	-	-	-	-	-	-
UBE2Z	-	-	-	-	-	-	(Vicoso et al. 2013a)	-	-	-	-	-	-
UBTF	-	-	-	-	-	(Vicoso et al. 2013a)	-	-	-	-	-	-	-
UGT2A3	-	-	-	-	-	(Vicoso et al. 2013a)	-	-	-	-	-	-	-
WAC	(Matsubara et al. 2016)	-	(Matsubara et al. 2016)	-	(Perry et al. 2018)	(Vicoso et al. 2013a)	(Vicoso et al. 2013a)	(Perry et al. 2018)	-	(Matsubara et al. 2016)	(Perry et al. 2018)	-	(Matsubara et al. 2016)
WDR48	-	-	-	-	(Perry et al. 2018)	(Vicoso et al. 2013a)	(Vicoso et al. 2013a)	(Perry et al. 2018)	-	-	(Perry et al. 2018)	-	-
YTHDC1	-	(Yin et al. 2016)	-	-	-	(Vicoso et al. 2013a)	(Yin et al. 2016)	-	-	-	-	-	-
ZBTB47	-	(Yin et al. 2016)	-	-	-	-	(Yin et al. 2016)	-	-	-	-	-	-
ZMYND11	-	-	-	-	-	(Vicoso et al. 2013a)	-	-	-	-	-	-	-
ZNF652	-	-	-	-	-	-	(Vicoso et al. 2013a)	-	-	-	-	-	-
