# Supplementary material for: Dosage-sensitive functions in embryonic development drove the survival of genes on sex-specific chromosomes in snakes, birds, and mammals
Source: HighWire-hosted journal article supplement (doi:10.1101/gr.268516.120), 2021-01-21
Supplement: Supplemental_Table_S5.xlsx [file Supplemental_Table_S5.xlsx]

## Sheet: Sheet1
Supplemental Table S5. Published candidate W genes identified as ancestral in this study.
Gene	Sistrurus miliarius	Thamnophis elegans	Gene Family
ASPHD1	(Vicoso et al. 2013a)	-
BCDK	-	(Vicoso et al. 2013a)
CA4	(Vicoso et al. 2013a)	-
CAMP	-	(Vicoso et al. 2013a)
ENSACAG00000002838	-	(Vicoso et al. 2013a)	IGHV
ENSACAG00000002854	-	(Vicoso et al. 2013a)	IGHV
ENSACAG00000002908	-	(Vicoso et al. 2013a)	IGHV
ENSACAG00000005531	(Vicoso et al. 2013a)	-	VMN2R26
ENSACAG00000007113	(Vicoso et al. 2013a)	-	VMN2R26
ENSACAG00000008049	(Vicoso et al. 2013a)	-	VMN2R26
ENSACAG00000009643	(Vicoso et al. 2013a)	-	VMN2R26
ENSACAG00000009658	(Vicoso et al. 2013a)	-	VMN2R26
ENSACAG00000009676	(Vicoso et al. 2013a)	-	VMN2R26
ENSACAG00000017523	(Vicoso et al. 2013a)	-	VMN2R26
ENSACAG00000021075	(Vicoso et al. 2013a)	-	IGHV
ENSACAG00000023814	-	(Vicoso et al. 2013a)	IGHV
FLT3G	(Vicoso et al. 2013a)	-
HOXA1	(Vicoso et al. 2013a)	-
HSPBP1	(Vicoso et al. 2013a)	-
KAT8	-	(Vicoso et al. 2013a)
LENG8	(Vicoso et al. 2013a)	-
LOC100559410	-	(Vicoso et al. 2013a)	VMN2R26
LOC103279549	-	(Vicoso et al. 2013a)	VMN2R26
LOC103279793	(Vicoso et al. 2013a)	-	VMN2R26
OR10AG1	-	(Vicoso et al. 2013a)
OR10H3	-	(Vicoso et al. 2013a)
PPP6R1	(Vicoso et al. 2013a)	(Vicoso et al. 2013a)
PRF1	-	(Vicoso et al. 2013a)
RASIP1	(Vicoso et al. 2013a)	-
RPL18	-	(Vicoso et al. 2013a)
SDR39U1	-	(Vicoso et al. 2013a)
SEZ6L2	-	(Vicoso et al. 2013a)
SLC17A7	(Vicoso et al. 2013a)	-
SNRK	(Vicoso et al. 2013a)	-
SRRM2	-	(Vicoso et al. 2013a)
TOP2B	-	(Vicoso et al. 2013a)
TRIM28	(Vicoso et al. 2013a)	-
TTYH1	(Vicoso et al. 2013a)	-
UBE2E1	(Vicoso et al. 2013a)	-
UBE2S	-	(Vicoso et al. 2013a)
ZNF850	(Vicoso et al. 2013a)	-
