# Supplementary material for: Dosage-sensitive functions in embryonic development drove the survival of genes on sex-specific chromosomes in snakes, birds, and mammals
Source: HighWire-hosted journal article supplement (doi:10.1101/gr.268516.120), 2021-01-21
Supplement: Supplemental_Table_S6.xlsx [file Supplemental_Table_S6.xlsx]

## Sheet: Sheet1
Supplemental Table S6. Estimated Caenophidian Stratum Boundaries.
Name	Max Branch Length	Proximal Z	Distal Z	Deinagkistrodon acutus	Sistrurus miliarius	Thamnophis elegans	Citation
Colubroidea Stratum	162.4	ZNF282	ELOB	Colubroidea	Colubroidea	Colubroidea	(Vicoso et al. 2013a; Yin et al. 2016)
Crotalus-Sisturus-Protobothrops	29.5	SRRM2	ZNF646	-	Crotalus-Sisturus-Protobothrops	-	(Schield et al. 2019)
Colubridae-Elapidae	51	SRRM2	PTPRH	-	-	Colubridae-Elapidae
Colubridae	48	PPP6R1	KHNYN	-	-	Colubridae
Crotalus-Sisturus	12.5	FLT3LG	KHNYN	-	-	Colubridae
PAR	0	CYLD	LIM2	PAR	PAR	PAR	(Schield et al. 2019)
