# Supplementary material for: Dosage-sensitive functions in embryonic development drove the survival of genes on sex-specific chromosomes in snakes, birds, and mammals
Source: HighWire-hosted journal article supplement (doi:10.1101/gr.268516.120), 2021-01-21
Supplement: Supplemental_Table_S7.xlsx [file Supplemental_Table_S7.xlsx]

## Sheet: 20201019_table_s05.txt
Supplemental Table S7. Ancestral gene statistics.
Number	Symbol	Symbol_Source	Human_Ensembl	Chicken_Ensembl	Lizard_Ensembl	Snake_Ensembl	Lineage	Branch_Length	Max_Branch_Length	Survival_Fraction	Huang_pHI	ExAC_Deletion_Intolerance	ExAC_Duplication_Intolerance	Gene_Average_PCT	HSA-GGA_miRNA_sites	HSA-GGA_miRNA_sites_gt_bg	HSA-ACA_miRNA_sites	HSA-ACA_miRNA_sites_gt_bg	HSA-MMU_dNdS	GGA-TGU_dNdS	NSC-ACA_dNdS	HSA_Expression_Breadth	GGA_Expression_Breadth	DAC_Expression_Breadth	TSI_Expression_Breadth	HSA_E4_RPKM	GGA_Blastocyst_FPKM	HSA_Testis_TSI	HSA_Prostate_TSI	HSA_Ovary_TSI	HSA_Fallopian_TSI	HSA_Uterus_TSI	HSA_Cervix_TSI	HSA_Vagina_TSI	GGA_Testis_TSI	GGA_Ovary_TSI	DAC_Testis_TSI	TSI_Ovary_TSI	Associated with NDD	Associated with CHD	Associated with CAKUT	Conserved_Sex_Bias	Sex_and_Reproduction_Related	Adjacent
10001	PLCXD1	HGNC:23148	ENSG00000182378	ENSGALG00000016721	ENSACAG00000011874	ENSNSUG00000007276	Therian	0	13	0	0.092								0.0745147	0.402235	0.223235		0.273118	0.803063			24.1126	0.0188151	0.0133038	0.0302775	0.0341255	0.0124376	0.0112621	0.0370402	0.0117908	0.00979909	0.269985		0	0	0	1	0	0
10002	GTPBP6	HGNC:30189	ENSG00000178605	ENSGALG00000016717	ENSACAG00000011834	ENSNSUG00000007279	Therian	0	13	0	0.115								0.0492056	0.33368	0.228666			0.757791	0.757791		5.32304	0.0102833	0.0217821	0.0303849	0.0306452	0.0267433	0.0236871	0.0235484	0.0120062	0.00955316	0.151876	0.151972	0	0	0	0	0	0
10003	PPP2R3B	HGNC:13417	ENSG00000167393	ENSGALG00000016702	ENSACAG00000011315	ENSNSUG00000002157	Therian	0	13	0	0.062			0.000333333					0.0162143	0.146805			0.263449	0.435604	0.435604		6.70951	0.0569942	0.0142105	0.0203061	0.0132649	0.0188323	0.00831435	0.0219892	0.0625732	0.132764	0.188099	0.136799	0	0	0	0	0	0
10004	SHOX	HGNC:10853	ENSG00000185960	ENSGALG00000016698	ENSACAG00000006055	ENSNSUG00000007294	Therian	0	13	0	0.086			0.130391	5	1	5	1		0.0434435	0.0567875			0.299556	0.299556		0.0789553	0.0162566	0.0472964	0.0224531	0.0795375	0.035833	0.0422974	0.0254514	0.0724657		0.0255397	0.00335817	0	0	0	0	0	0
10005	CRLF2	HGNC:14281	ENSG00000205755	ENSGALG00000016696		ENSNSUG00000001984	Therian	0	13	0									0.0596664	0.46464								0.0100333	0.0386789		0.0404003	0.0349692	0.0275858	0.0380256					0	0	0	0	0	0
10006	CSF2RA	HGNC:2435	ENSG00000198223	ENSGALG00000019148	ENSACAG00000024458	ENSNSUG00000006247	Therian	0	13	0	0.207			6.66667e-05					0.0888439			0.082447	0.253565					0.00486489	0.0098932	0.0110944	0.0397566	0.00940015	0.0103227	0.0190248					0	0	0	0	0	0
10007	IL3RA	HGNC:6012	ENSG00000185291	ENSGALG00000019148	ENSACAG00000015455	ENSNSUG00000010305	Therian	0	13	0	0.106								0.0465754				0.253565					0.0106585	0.024386	0.0358935	0.0311912	0.0316561	0.0294858	0.0183651					0	0	0	0	0	0
10008	SLC25A6	HGNC:10992	ENSG00000169100	ENSGALG00000016691		ENSNSUG00000007306	Therian	0	13	0	0.474			0.208	2	1	3	1		0.00796108			0.390709				708.852	0.00540379	0.0260535	0.0449608	0.0269183	0.022976	0.0305993	0.0257728	0.00624149	0.0164358			0	0	0	0	0	0
10009	ASMTL	HGNC:751	ENSG00000169093	ENSGALG00000016689	ENSACAG00000005977	ENSNSUG00000007311	Therian	0	13	0	0.08									0.275162	0.185505		0.383782	0.79025	0.79025		3.12315	0.0117026	0.0342696	0.0401143	0.051701	0.0304615	0.0344548	0.0211408	0.048437	0.123336	0.254648	0.094823	0	0	0	0	0	0
10010	P2RY8	HGNC:15524	ENSG00000182162	ENSGALG00000016687	ENSACAG00000027507	ENSNSUG00000007318	Therian	13	13	1	0.071			0.000409091						0.18314	0.212043		0.160608	0.331552	0.331552		0.00878693	0.00462948	0.0161912	0.0139513	0.0359149	0.0168258	0.0110246	0.0157587	0.0231657	0.0104065	0.172268	0.0806605	0	0	0	0	0	1
10011	AKAP17A	HGNC:18783	ENSG00000197976	ENSGALG00000016686	ENSACAG00000005956	ENSNSUG00000007325	Therian	13	13	1										0.0747445	0.10168		0.475986	0.681555	0.681555		21.8138	0.0199605	0.0385282	0.0548388	0.0502383	0.0281597	0.02305	0.028562	0.0682866	0.242684	0.238046	0.0911958	0	0	0	0	0	1
10012	ASMT	HGNC:750	ENSG00000196433	ENSGALG00000016685	ENSACAG00000014294	ENSNSUG00000007326	Therian	0	13	0	0.079								0.00508335	0.191221	0.256491			0.250101	0.250101		0.0913409	0.0200047	0.0274874	0.0178301	0.101849	0.0182036	0.0278021	0.0194138			0.999597	0.0760408	0	0	0	0	0	0
10013	DHRSX	HGNC:18399	ENSG00000169084	ENSGALG00000016681	ENSACAG00000005917	ENSNSUG00000004321	Therian	0	13	0	0.162			0.0113					0.0181907	0.270192	0.231029		0.573822	0.708939	0.708939		3.70693	0.0220585	0.0423907	0.028108	0.0289407	0.0245308	0.0216963	0.0204816	0.00277321	0.0207756	0.276827	0.153878	0	0	0	0	0	0
10014	ZBED1	HGNC:447	ENSG00000214717		ENSACAG00000023513	ENSNSUG00000004321	Therian	13	13	1	0.085			0.00195833							0.0157528						13.8854	0.0113252	0.0235071	0.0262515	0.0331366	0.0295546	0.0211621	0.0278983				0.102603	0	0	0	0	0	0
10015	CD99	HGNC:7082	ENSG00000002586	ENSGALG00000024488		ENSNSUG00000010931	Therian	0	13	0	0.099			0.00579167									0.395209				39.1586	0.0280213	0.0395538	0.0327755	0.0489047	0.0371288	0.0352604	0.0330268	0.0462946	0.0256924		0.358475	0	0	0	0	0	0
10016	XG	HGNC:12806	ENSG00000124343	ENSGALG00000016656		ENSNSUG00000020640	Therian	0	87.18	0	0.134			0.00392									0.141184					0.00183385	0.00451907	0.00165161	0.00439611	0.00446669	0.00194422	0.0784258					0	0	0	0	0	0
10017	GYG2	HGNC:4700	ENSG00000056998	ENSGALG00000016655	ENSACAG00000005842	ENSNSUG00000007348	Therian	0	87.18	0	0.435			0.05168						0.114891	0.246409		0.165675			2.4	2.57679	0.00216524	0.0261112	0.00391791	0.00131911	0.0131601	0.00429921	0.00403348	0.0799837	0.0219261		0.0232653	0	0	0	0	0	0
10018	ARSD	HGNC:717	ENSG00000006756	ENSGALG00000016654	ENSACAG00000005786	ENSNSUG00000007492	Therian	0	87.18	0	0.349			0.00234375						0.198423	0.15096	0.326379	0.111111					0.0114651	0.037326	0.0333917	0.0199462	0.0192459	0.0116282	0.0202188	0.0258284	0.00101256		0.0396781	0	0	0	0	0	0
10019	ARSL	HGNC:719	ENSG00000157399	ENSGALG00000016654	ENSACAG00000013083	ENSNSUG00000007358	Therian	0	87.18	0	0.143			0.00181818						0.198423	0.0855055		0.111111			0.1		0.00185506	0.00208494	0.0134693	0.00374265	0.00242339	0.00355636	0.00422009	0.0258284	0.00101256		9.03021e-07	1	0	0	0	0	0
10020	ARSH	HGNC:32488	ENSG00000205667	ENSGALG00000016636	ENSACAG00000013083	ENSNSUG00000004831	Therian	0	87.18	0	0.055			0.00625						0.236591	0.0855055		0.225936	0.660929			1.36343	0.0492431	0.0495968		0.00804258			0.109847	0.0188827	0.0198859	0.36662		0	0	0	0	0	0
10021	ARSF	HGNC:721	ENSG00000062096		ENSACAG00000013083	ENSNSUG00000006343	Therian	0	87.18	0	0.102										0.0855055							0.00882038	0.0138954	0.0111509	0.00695518	0.00866335	0.00656679	0.0908211				0.019268	0	0	0	0	0	0
10022	MXRA5	HGNC:7539	ENSG00000101825	ENSGALG00000016635	ENSACAG00000005768	ENSNSUG00000004831	Therian	29.44	87.18	0.337692	0.211			0.0156875						0.283445	0.247411		0.203872	0.315189			1.57136	0.00118236	0.0428762	0.00255186	0.00084271	0.00325201	0.00118374	0.00514273	0.0415178	0.0105556	0.793175		0	0	0	0	0	1
10023	PRKX	HGNC:9441	ENSG00000183943	ENSGALG00000016629	ENSACAG00000005723	ENSNSUG00000007879	Therian	74.18	87.18	0.850883				0.0741702	5	1	3	1	0.0756148	0.0270671	0.0173152	0.156405	0.234593	0.450857	0.450857	2.2	13.5958	0.0363008	0.0129608	0.0128708	0.0105543	0.012465	0.0080394	0.0621246			0.5545	0.0463497	0	0	0	1	0	1
10024	NLGN4X	HGNC:14287	ENSG00000146938	ENSGALG00000016628	ENSACAG00000004520	ENSNSUG00000007879	Therian	140.34	140.34	1	0.725			0.134583	8	1	8	1		0.00419847	0.0137919	0.0625	0.157964	0.539898	0.539898	0.5	0.530366	0.0156726	0.0113633	0.13245	0.0453758	0.0139749	0.0150363	0.0108281	0.0304463	0.00903039	0.246057	0.0612701	0	0	0	0	0	0
10025	PUDP	HGNC:16818	ENSG00000130021	ENSGALG00000016623	ENSACAG00000004616	ENSNSUG00000007902	Therian	0	140.34	0	0.062								0.210894		0.146339	0.481065	0.13701	0.651977	0.651977												0.370225	0.261897	0	0	0	0	0	0
10026	STS	HGNC:11425	ENSG00000101846	ENSGALG00000016622	ENSACAG00000000390	ENSNSUG00000007902	Therian	9.2	140.34	0.0655551	0.213			0.0151818						0.323918	0.200608	0.0625	0.248101			0.4	0.399971	0.00628004	0.0340295	0.0182227	0.0232722	0.0185239	0.0133052	0.0207959	0.0327558	0.0148004		0.151267	0	0	0	0	0	0
10027	PNPLA4	HGNC:24887	ENSG00000006757	ENSGALG00000016618	ENSACAG00000000415	ENSNSUG00000007906	Therian	0	140.34	0	0.131			0.0304						0.224304	0.153956	0.0625	0.212717			7.2	0.472374	0.0169255	0.026374	0.0287063	0.0145501	0.0175002	0.00973271	0.0209364	0.31663	0.019066		0.249658	0	0	0	0	0	0
10028	ANOS1	HGNC:6211	ENSG00000011201	ENSGALG00000016616	ENSACAG00000000439	ENSNSUG00000007931	Therian	9.2	140.34	0.0655551	0.432			0.0712222	2		2	1			0.178755	0.149767	0.20803	0.332172	0.332172		0.556181										0.119242	0.0129729	0	0	1	0	0	0
10029	FAM9A	HGNC:18403	ENSG00000183304			ENSNSUG00000013537	Therian	0	140.34	0	0.058			0.000333333								0.0627506		0.751526	0.751526	1		0.42222	0.00983045	0.0318219	0.183787	0.0261929	0.0121994	0.0119895			0.206585	0.0928009	0	0	0	0	0	0
10030	TBL1X	HGNC:11585	ENSG00000101849	ENSGALG00000013366	ENSACAG00000000539	ENSNSUG00000017216	Therian	90.44	140.34	0.644435	0.369			0.184161	17	1	9	1	0.037047	0.00601604	0.048272	0.342611	0.504591			2.7	54.1576	0.0232591	0.0781409	0.026929	0.0756009	0.0987936	0.0233938	0.0312045				0.105951	0	0	0	0	0	0
10031	GPR143	HGNC:20145	ENSG00000101850	ENSGALG00000016615	ENSACAG00000000735	ENSNSUG00000007931	Therian	0	662.84	0	0.089			0.012					0.191337	0.102775	0.218006	0.158318	0.138522			10.8	0.141469	0.0103147	0.0154039	0.0462752	0.00275033	0.0222388	0.000823793	0.0182123				0.0570762	0	0	0	0	0	0
10032	SHROOM2	HGNC:630	ENSG00000146950	ENSGALG00000016614	ENSACAG00000000777	ENSNSUG00000004846	Therian	9.2	164.94	0.0557779	0.117			0.18937	2	1	1	1	0.154601	0.22851		0.0625	0.275772	0.61841	0.61841	1.3	12.4456	0.0498526	0.0312556	0.0491618	0.0188948	0.0124477	0.00561455	0.0502308			0.266991	0.163205	0	0	0	1	0	0
10033	CLDN34	HGNC:51259	ENSG00000234469		ENSACAG00000029642	ENSNSUG00000019390	Therian	0	164.94	0									0.652209		0.0107522																		0	0	0	0	0	0
10034	Cldn34b2	MGI:1920597					Therian	0	164.94	0																													0	0	0	0	0	0
10035	Samt4	MGI:1922435					Therian	110	274.94	0.400087																													0	0	0	0	0	0
10036	WWC3	HGNC:29237	ENSG00000047644	ENSGALG00000016611	ENSACAG00000000828	ENSNSUG00000004846	Therian	9.2	336.94	0.0273046	0.111			0.128222	4		3	1		0.0618038		0.437428	0.278671	0.391236	0.391236	1	50.671	0.0116606	0.0292417	0.0343472	0.0546278	0.0260381	0.0320028	0.0263443			0.201491	0.100105	0	0	0	0	0	0
10037	CLCN4	HGNC:2022	ENSG00000073464	ENSGALG00000016607	ENSACAG00000015662	ENSNSUG00000007936	Therian	0	336.94	0	0.283			0.104941	1	1			0.00924164	0.00713267	0.057238		0.147472	0.260562	0.260562	1.3	0.386078	0.00557499	0.00236082	0.0031333	0.00104598	0.00163987	0.00134746	0.00225107	0.00564571	0.00226567	0.0334968	0.00620222	0	0	0	1	0	0
10038	MID1	HGNC:7095	ENSG00000101871	ENSGALG00000016603	ENSACAG00000001219	ENSNSUG00000007955	Therian	0	336.94	0	0.143			0.090375	11	1	3	1	0.037762	0.00661927	0.0178141	0.0625	0.452557	0.565795	0.565795	10.9	3.66796	0.0124972	0.0439139	0.0192669	0.0434852	0.0496763	0.0960654	0.0300172			0.224959	0.0537274	0	0	0	0	0	0
10039	HCCS	HGNC:4837	ENSG00000004961	ENSGALG00000005571	ENSACAG00000004808	ENSNSUG00000008061	Therian	0	662.84	0	0.099			0.0399167					0.152608	0.0666189	0.222315	0.531682	0.653077	0.662569	0.662569	72.3	67.7421	0.0261503	0.0214145	0.0167126	0.0155736	0.0191059	0.0288937	0.0266529	0.0175309	0.060028	0.177526	0.362118	0	0	0	0	0	0
10040	ARHGAP6	HGNC:676	ENSG00000047648	ENSGALG00000016602	ENSACAG00000001367	ENSNSUG00000007955	Therian	0	662.84	0	0.164			0.28875	9	1	3		0.171391	0.0629712	0.082111	0.34438	0.375235	0.548692	0.548692		2.88826	0.00591005	0.117351	0.0501977	0.174105	0.0599182	0.0683378	0.0213765	0.0618316	0.160855	0.207584	0.0988891	0	0	0	1	0	0
10041	AMELX	HGNC:461	ENSG00000125363			ENSNSUG00000007956	Therian	453.74	662.84	0.684539	0.129			0.015					0.518746									0.357324	0.115252	0.0646741	0.152363	0.0601936	0.0739134						0	0	0	0	0	0
10042	MSL3	HGNC:7370	ENSG00000005302	ENSGALG00000016598	ENSACAG00000001416	ENSNSUG00000008195	Therian	0	662.84	0				0.00442857					0.187562	0.0542556	0.060938	0.394094	0.425278	0.369755	0.369755	18.1	8.8757	0.0323665	0.0226257	0.0208644	0.0356422	0.0241491	0.0206844	0.0277119			0.170677	0.226603	0	0	0	0	0	0
10043	FRMPD4	HGNC:29007	ENSG00000169933	ENSGALG00000016594	ENSACAG00000001515	ENSNSUG00000008195	Therian	0	662.84	0	0.199			0.195655	9	1	7	1	0.109577	0.150711	0.150049		0.157885	0.259877	0.259877		0.520535	0.00732724	0.00291243	0.000202952	0.000935556	0.000315163	0.0237441	0.000236908			0.0326214	0.141407	0	0	0	1	0	0
10044	PRPS2	HGNC:9465	ENSG00000101911	ENSGALG00000016592	ENSACAG00000001584	ENSNSUG00000008195	Therian	0	662.84	0	0.122			0.130111					0.00953947	0.0748765	0.00906056	0.160155	0.112644	0.306113	0.306113	24	5.73707	0.188933	0.0429314	0.153868	0.0542769	0.0327971	0.0425272	0.0289908	0.00117792	0.0117278	0.0892571	0.0326744	0	0	0	0	0	0
10045	TLR7	HGNC:15631	ENSG00000196664	ENSGALG00000016590	ENSACAG00000001655	ENSNSUG00000008197	Therian	0	662.84	0	0.111			0.0189048					0.235937	0.254185	0.254008		0.183038	0.487443	0.487443		0.0355425	0.00974779	0.0201409	0.00916341	0.00796504	0.0086448	0.00978505	0.0148129	0.00385068	0.0089509	0.0231811	0.0311814	0	0	0	0	0	0
10046	TLR8	HGNC:15632	ENSG00000101916			ENSNSUG00000008195	Therian	0	662.84	0	0.108			0.0271389					0.302583			0.0670955						0.00119853	0.004145	0.00215828	0.0231486	0.00382442	0.00712116	0.00347046					0	0	0	1	0	0
10047	TMSB4X	HGNC:11881	ENSG00000205542		ENSACAG00000021083	ENSNSUG00000008199	Therian	308.04	662.84	0.464728	0.396											0.304194																0.613571	0	0	0	0	0	0
10048	EGFL6	HGNC:3235	ENSG00000198759	ENSGALG00000016584	ENSACAG00000001659	ENSNSUG00000008203	Therian	0	662.84	0	0.086								0.260982	0.230769	0.200062	0.0725735	0.141175			0.8	0.236243	0.0100821	0.0082891	0.00116028	0.00640282	0.00495057	0.00198076	0.023989	0.233825	0.0179195		0.121935	0	0	0	0	0	0
10049	TCEANC	HGNC:28277	ENSG00000176896	ENSGALG00000016581	ENSACAG00000001680	ENSNSUG00000008225	Therian	0	662.84	0				0.0508667					0.395976	0.323368	0.434252		0.593871			3.1	1.00676	0.0131853	0.0222366	0.0254002	0.0484788	0.0239531	0.0180238	0.0174182	0.0141021	0.00286966		0.223544	0	0	0	1	0	0
10050	RAB9A	HGNC:9792	ENSG00000123595	ENSGALG00000016579	ENSACAG00000001712	ENSNSUG00000008226	Therian	0	737.02	0	0.101			0.127111	3	1			0.0519301	0.0312052	0.0514019	0.303105	0.514749	0.868833	0.868833	119.4	18.0557	0.00810588	0.0262627	0.0278028	0.0398531	0.0267036	0.0174702	0.0313479	0.00775244	0.0171427	0.287694	0.346301	0	0	0	0	0	0
10051	TRAPPC2	HGNC:23068	ENSG00000196459	ENSGALG00000016578		ENSNSUG00000000465	Therian	0	845.02	0				0.02					0.0270506	0.0708508		0.276246	0.427764			4	32.8093	0.00950999	0.0274428	0.025094	0.0439407	0.0273109	0.0229362	0.0228184	0.0812741	0.0762644		0.306657	0	0	0	0	0	0
10052	OFD1	HGNC:2567	ENSG00000046651	ENSGALG00000016576	ENSACAG00000001745	ENSNSUG00000008232	Therian	211.7	852.72	0.248264	0.106								0.39375	0.337778		0.350831	0.170788	0.733936	0.733936	22.1	5.78751	0.0317681	0.0325535	0.0322334	0.0252126	0.0226809	0.0148101	0.0259155	0.143411	0.195125	0.250431	0.244447	1	1	0	1	0	0
10053	GPM6B	HGNC:4461	ENSG00000046653	ENSGALG00000016575	ENSACAG00000001831	ENSNSUG00000008231	Therian	0	845.02	0	0.88			0.163346	22	1	17	1	0.0310536	0.167861	0.0358416	0.15879	0.126665	0.258769	0.258769	2.9	4.7302	0.000888887	0.00628568	0.00104344	0.00513141	0.000982747	0.00333032	0.0026136	0.00449656	0.000837758	0.0255841	0.0184028	0	0	0	1	0	0
10054	GEMIN8	HGNC:26044	ENSG00000046647	ENSGALG00000016574	ENSACAG00000001988	ENSNSUG00000008232	Therian	0	662.84	0	0.081			0.05					0.330548	0.158077	0.245035	0.426763	0.504177	0.723558	0.723558	6.7	14.3819	0.0111027	0.0250365	0.031192	0.0212497	0.0294816	0.025443	0.0196471	0.0875649	0.100725	0.345515	0.0847226	0	0	0	0	0	0
10055	GLRA2	HGNC:4327	ENSG00000101958	ENSGALG00000016571	ENSACAG00000010567	ENSNSUG00000008244	Therian	0	662.84	0	0.599			0.180571	7	1	6	1	0.0226403	0.0126659	0.0428484		0.130108	0.254687	0.254687			0.00276906	0.00210544	0.00501245	0.00409319	0.00213268	0.00425023	0.00438847	0.165526	0.00613376	0.012995	0.0885305	1	0	0	0	0	0
10056	FANCB	HGNC:3583	ENSG00000181544	ENSGALG00000016569	ENSACAG00000010624	ENSNSUG00000008246	Therian	0	662.84	0	0.092			0.0334651					0.816402	0.448134	0.326427		0.140166	0.715383		7	2.51188	0.0375807	0.0250048	0.0378597	0.0283373	0.0327468	0.0201581	0.0445721		0.373172	0.201308		0	0	0	0	0	0
10057	MOSPD2	HGNC:28381	ENSG00000130150	ENSGALG00000016568	ENSACAG00000010632	ENSNSUG00000008249	Therian	0	662.84	0	0.221			0.182231	4	1	3	1	0.0851667	0.102693	0.161257	0.19127	0.488007	0.61835	0.61835	4.4	23.3885	0.0115983	0.01504	0.0219286	0.025236	0.0208022	0.0143232	0.0359793	0.0192336	0.0286476	0.404302	0.0706176	0	0	0	0	0	0
10058	ASB9	HGNC:17184	ENSG00000102048	ENSGALG00000016563	ENSACAG00000004391	ENSNSUG00000008256	Therian	0	662.84	0	0.017			0.00025					0.243399	0.458127		0.0889493	0.199616	0.44943	0.44943		7.55682	0.40464	0.0063455	0.00565037	0.0168251	0.0178985	0.00513581	0.00960383	0.0170134	0.00891542	0.0812339	0.0332804	0	0	0	1	0	0
10059	ASB11	HGNC:17186	ENSG00000165192	ENSGALG00000016562	ENSACAG00000010695	ENSNSUG00000008742	Therian	0	662.84	0	0.145			0.0358571					0.10795	0.127224		0.0990867					0.0134414	0.00191177	0.00215025	0.00279967	0.00174715	0.00202148	0.00149441	0.00171519	0.00527757	0.0120728			0	0	0	0	0	0
10060	PIGA	HGNC:8957	ENSG00000165195	ENSGALG00000016559	ENSACAG00000007906	ENSNSUG00000012511	Therian	0	662.84	0	0.115			0.213962					0.191555	0.0997554	0.133891	0.0625	0.159144	0.67823	0.67823	11.3	9.81194	0.015163	0.022656	0.0187394	0.108164	0.0175614	0.0143417	0.0280982	0.26279	0.242546	0.245619	0.11704	0	0	0	1	0	0
10061	VEGFD	HGNC:3708	ENSG00000165197	ENSGALG00000016558	ENSACAG00000012419	ENSNSUG00000012511	Therian	0	662.84	0	0.108			0.0886667	3	1	2	1	0.172003	0.204198		0.184287	0.3178				0.094006	0.00757501	0.00750806	0.0119032	0.0840675	0.0147486	0.0152934	0.00757401	0.0439596	0.0132805			0	0	0	0	0	0
10062	PIR	HGNC:30048	ENSG00000087842		ENSACAG00000012352	ENSNSUG00000014285	Therian	0	662.84	0	0.117								0.0527534			0.250556				0.6		0.0101432	0.0203734	0.0208413	0.027106	0.018387	0.01429	0.0281463					0	0	0	0	0	0
10063	BMX	HGNC:1079	ENSG00000102010	ENSGALG00000016557	ENSACAG00000012167	ENSNSUG00000019769	Therian	0	662.84	0	0.486			0.105667					0.109493			0.150842	0.172799				0.00580058	0.00534032	0.00832757	0.00591359	0.156142	0.0336796	0.0133348	0.0129255	0.0216088	0.00948484			0	0	0	0	0	0
10064	ACE2	HGNC:13557	ENSG00000130234	ENSGALG00000016554	ENSACAG00000016963	ENSNSUG00000012800	Therian	0	662.84	0	0.877			0.1355					0.258893	0.25012	0.259042	0.0939614	0.125445			1.1	0.0460151	0.086767	0.000872192	0.00173264	0.0119097	0.00115861	0.000751015	0.00926371	0.0626864	0.00100618		0.000241269	0	0	0	0	0	0
10065	CLTRN	HGNC:29437	ENSG00000147003	ENSGALG00000016553	ENSACAG00000017031	ENSNSUG00000013674	Therian	0	662.84	0	0.824			0.07125					0.193366			0.0699114	0.115074			1	1.35905	0.00535701	0.00332548	0.0039276	0.00719513	0.00147996	0.00132928	0.00179298				0.256658	0	0	0	0	0	0
10066	CA5B	HGNC:1378	ENSG00000169239	ENSGALG00000005855	ENSACAG00000013505	ENSNSUG00000009110	Therian	0	662.84	0	0.077			0.0551944					0.14879	0.0686598		0.0625	0.315544	0.422866		1.9	17.6694	0.0518449	0.0243576	0.0312314	0.0248697	0.0194566	0.0120158	0.021057	0.0111217	0.0691888	0.0720432		0	0	0	1	0	0
10067	ZRSR2	HGNC:23019	ENSG00000169249	ENSGALG00000016552	ENSACAG00000017034	ENSNSUG00000012797	Therian	174	662.84	0.262507	0.052			0.00233333					0.170087	0.0338184	0.0639278	0.347711	0.525674	0.421639	0.421639	5.1	35.8769	0.00729365	0.028105	0.0226068	0.0379433	0.0256179	0.0339955	0.0211535	0.207868	0.278019	0.151605	0.199249	0	0	0	0	0	1
10068	AP1S2	HGNC:560	ENSG00000182287	ENSGALG00000016551	ENSACAG00000017050	ENSNSUG00000012796	Therian	96	662.84	0.144831	0.715			0.188143	11	1	5	1	0.164125		0.395062	0.171167	0.499024	0.2659	0.2659	3.2	40.2815	0.0231444	0.012583	0.00689404	0.0266566	0.0450555	0.0349077	0.00989104	0.0557363	0.184702	0.0144991	0.102697	0	0	0	1	0	1
10069	GRPR	HGNC:4609	ENSG00000126010	ENSGALG00000016550	ENSACAG00000017052	ENSNSUG00000012793	Therian	0	662.84	0	0.347			0.00778571					0.111247	0.0483032	0.121655		0.279922			0.8	0.277364	0.00558264	0.0108516	0.00160891	0.00144475	0.0109194	0.0279613	0.00436288				0.494754	0	0	0	0	0	0
10070	MAGEB17	HGNC:17418	ENSG00000182798			ENSNSUG00000016311	Therian	0	662.84	0				0.00333333												0.6		0.279647	0.0234379		0.0135329	0.0181653	0.0262001	0.00687917					0	0	0	0	0	0
10071	CTPS2	HGNC:2520	ENSG00000047230	ENSGALG00000016549	ENSACAG00000011247	ENSNSUG00000012793	Therian	0	662.84	0	0.393			0.0215					0.116974	0.0525152	0.0651427	0.167122	0.183113	0.602202	0.602202		2.4128	0.00559469	0.0314637	0.0409488	0.0353968	0.031261	0.0286626	0.0225088	0.109902	0.064552	0.199244	0.0709124	0	0	0	0	0	0
10072	S100G	HGNC:1436	ENSG00000169906			ENSNSUG00000014248	Therian	0	662.84	0	0.209								0.0858302																				0	0	0	0	0	0
10073	SYAP1	HGNC:16273	ENSG00000169895	ENSGALG00000016548	ENSACAG00000011393	ENSNSUG00000012794	Therian	0	662.84	0	0.066			0.106714					0.14458	0.1574	0.13488	0.60801	0.713239	0.700973	0.700973	31.9	22.3135	0.0225604	0.0358684	0.0233624	0.0219851	0.023868	0.0224016	0.0248572	0.0741261	0.0752604	0.305075	0.188995	0	0	0	1	0	0
10074	TXLNG	HGNC:18578	ENSG00000086712	ENSGALG00000016547	ENSACAG00000011478	ENSNSUG00000012789	Therian	440.04	662.84	0.663871				0.284486	18	1	10	1	0.152313	0.0480179	0.0755227	0.0625	0.367653	0.692177	0.692177	14	47.2977	0.0210971	0.0259049	0.0371638	0.0540829	0.0208685	0.0259459	0.0173027	0.122846	0.165819	0.249474	0.0922413	0	0	0	1	0	0
10075	RBBP7	HGNC:9890	ENSG00000102054	ENSGALG00000016546		ENSNSUG00000007988	Therian	0	662.84	0	0.964			0.243143	4	1	2	1	0.0334245	0.162516		0.365665	0.347874			182.3	12.4075	0.0487338	0.0377344	0.0481588	0.0313951	0.0390539	0.0354135	0.0252327	0.111373	0.271285			0	0	0	0	0	0
10076	REPS2	HGNC:9963	ENSG00000169891	ENSGALG00000016545	ENSACAG00000011590	ENSNSUG00000012787	Therian	0	662.84	0	0.308			0.199638					0.179012	0.182388	0.234241	0.320366	0.268211	0.341159	0.341159		1.21061	0.00777953	0.0263135	0.0153192	0.0108251	0.0190276	0.00681108	0.00546953	0.0104362	0.0429905	0.102469	0.140397	0	0	0	0	0	0
10077	NHS	HGNC:7820	ENSG00000188158	ENSGALG00000016543	ENSACAG00000011634	ENSNSUG00000012782	Therian	0	662.84	0	0.148			0.270914	26	1	18	1	0.147009	0.145722	0.19593	0.0625	0.423218	0.31247	0.31247		0.474639	0.0219209	0.0291778	0.0285805	0.0371131	0.0445997	0.0450862	0.0288085	0.014003	0.0218295	0.0904427	0.34189	1	0	0	0	0	0
10078	SCML1	HGNC:10580	ENSG00000047634			ENSNSUG00000000400	Therian	0	662.84	0	0.028			0.0585882	3	1	3	1				0.122899				2		0.0824561	0.0309453	0.0613289	0.123216	0.0255497	0.0242517	0.0184637					0	0	0	0	0	0
10079	RAI2	HGNC:9835	ENSG00000131831	ENSGALG00000016538	ENSACAG00000011661	ENSNSUG00000012779	Therian	0	662.84	0	0.731			0.2935	3	1	1	1	0.113373	0.0266309	0.139524	0.0625	0.386269	0.418423	0.418423	0.2	1.88626	0.00846294	0.0571151	0.0492683	0.248773	0.0691576	0.0311598	0.0340539	0.00534577	0.0574991	0.180455	0.0930034	0	0	0	0	0	0
10080	BEND2	HGNC:28509	ENSG00000177324	ENSGALG00000016541		ENSNSUG00000017921	Therian	0	662.84	0				0.016					0.872002	0.344026		0.0625	0.229343				0.936682	0.596332	0.0133322	0.0347602	0.0233122	0.0238794	0.0151756	0.0206101	0.0740083	0.0696128			0	0	0	0	0	0
10081	SCML2	HGNC:10581	ENSG00000102098	ENSGALG00000016537	ENSACAG00000011680	ENSNSUG00000012778	Therian	0	662.84	0	0.109			0.285407	10	1	4	1	0.389104	0.368703	0.151022	0.100514	0.238636	0.43876	0.43876	16.9	3.39456	0.240271	0.0205509	0.0657775	0.0365458	0.0293234	0.0303736	0.0218234	0.0832121	0.0741643	0.25843	0.0132388	0	0	0	0	0	0
10082	CDKL5	HGNC:11411	ENSG00000008086	ENSGALG00000016529	ENSACAG00000011708	ENSNSUG00000012777	Therian	0	662.84	0	0.432				NA				0.0731268	0.107814	0.0930605	0.177785	0.186951	0.342347	0.342347	1.7	0.356512	0.0571364	0.0236248	0.023056	0.0255173	0.0208103	0.0131141	0.0251751	0.0841071	0.00734692	0.230272	0.0924469	0	0	0	0	0	0
10083	RS1	HGNC:10457	ENSG00000102104	ENSGALG00000016523		ENSNSUG00000012776	Therian	0	662.84	0	0.197			0.0803448					0.0289671	0.017932		0.0625		0.260355		0.6	0.142654	0.00391306	0.00559338	0.00466701	0.00360118	0.00595974	0.00479756	0.00318102	0.453729	0.0254132	0.0397724		0	1	0	0	0	0
10084	PPEF1	HGNC:9243	ENSG00000086717	ENSGALG00000016522	ENSACAG00000011757	ENSNSUG00000012746	Therian	0	662.84	0	0.158			0.0018			1		0.468479	0.472922	0.166425	0.0625	0.116926	0.262355	0.262355	0.5	6.68175	0.419435	0.0107434	0.00833737	0.00326521	0.00302473	0.00402266	0.00301042	0.194374	0.37215	0.047093	0.101116	0	0	0	0	0	0
10085	PHKA2	HGNC:8926	ENSG00000044446	ENSGALG00000016518	ENSACAG00000011798	ENSNSUG00000012744	Therian	0	662.84	0	0.098			0.0248846					0.101401	0.107105		0.298727	0.275422	0.544053	0.544053	2.7	2.98509	0.0318954	0.0303091	0.0395905	0.0223308	0.0236037	0.0137191	0.0213574	0.0429223	0.0352923	0.232403	0.0915362	0	0	0	0	0	0
10086	ADGRG2	HGNC:4516	ENSG00000173698	ENSGALG00000016511	ENSACAG00000011948	ENSNSUG00000012742	Therian	0	662.84	0	0.434			0.1805	1	1			0.262758	0.202845	0.129283	0.0707643	0.149648	0.440763	0.440763		0.921338								0.427442	0.0199947	0.0398437	0.727546	0	0	0	0	0	0
10087	PDHA1	HGNC:8806	ENSG00000131828	ENSGALG00000016430	ENSACAG00000012190	ENSNSUG00000012740	Therian	0	662.84	0	0.28			0.0480455					0.0179342	0.0740909	0.0611101	0.238656	0.386228	0.666069	0.666069	189.3	159.954	0.00637189	0.0135933	0.0133441	0.0144811	0.0135121	0.0196843	0.0168522	0.0616016	0.0430071	0.296178	0.132238	0	0	0	0	0	0
10088	MAP3K15	HGNC:31689	ENSG00000180815	ENSGALG00000016426	ENSACAG00000012298	ENSNSUG00000012661	Therian	0	662.84	0	0.092			0.00669231					0.160548	0.129743	0.099056	0.23773	0.115571	0.570929	0.570929	0.3	4.42759	0.0243954	0.00277231	0.0162397	0.00459348	0.00389268	0.00216506	0.00350946	0.0259677	0.00636025	0.137451	0.00853283	0	0	0	0	0	0
10089	SH3KBP1	HGNC:13867	ENSG00000147010	ENSGALG00000016420	ENSACAG00000012504	ENSNSUG00000012391	Therian	0	662.84	0	0.793			0.320393	9	1	7	1	0.0814793	0.125691	0.160532	0.350669	0.349976	0.523585	0.523585	3.4	65.3334	0.00648325	0.00730854	0.0125557	0.0120231	0.0120323	0.0080106	0.0173899	0.02996	0.027492	0.372436	0.129727	0	0	0	1	0	0
10090	BCLAF3	HGNC:27413	ENSG00000173681	ENSGALG00000016418	ENSACAG00000012584	ENSNSUG00000012389	Therian	0	662.84	0	0.187			0.191925	2	1			0.438479	0.300858	0.3197	0.23643	0.306341	0.722671	0.722671	0.6	26.1545	0.0135745	0.0263087	0.0316251	0.0431809	0.0276372	0.0260943	0.0240814	0.113542	0.0773844	0.345939	0.151822	0	0	0	0	0	0
10091	MAP7D2	HGNC:25899	ENSG00000184368	ENSGALG00000016415	ENSACAG00000012609	ENSNSUG00000012387	Therian	0	662.84	0	0.223			0.0508421	2				0.250264	0.166184		0.100239	0.157682	0.485228	0.485228	6.9	6.36151	0.0505128	0.002413	0.00144923	0.00137374	0.0011919	0.00209955	0.00142178	0.0294539	0.0808127	0.0592968	0.0115136	0	0	0	0	0	0
10092	EIF1AX	HGNC:3250	ENSG00000173674		ENSACAG00000012660	ENSNSUG00000012384	Therian	551.94	662.84	0.83269				0.0657692	1				0.0547771			0.0625				17.8		0.0302494	0.0256219	0.0330499	0.0326004	0.0281931	0.0240535	0.0317895					0	0	0	1	0	0
10093	RPS6KA3	HGNC:10432	ENSG00000177189	ENSGALG00000016406	ENSACAG00000012681	ENSNSUG00000012329	Therian	0	662.84	0	0.681			0.297522	13	1	11	1	0.00215363	0.0620965	0.0426963	0.391486	0.361843	0.660732	0.660732	2.5	11.9933	0.0053627	0.0238622	0.0180473	0.048263	0.0266097	0.0309471	0.0218295	0.023389	0.0438411	0.289952	0.124882	0	0	0	0	0	0
10094	CNKSR2	HGNC:19701	ENSG00000149970	ENSGALG00000016391	ENSACAG00000025299	ENSNSUG00000011963	Therian	0	662.84	0	0.681			0.233632	11	1	2		0.0220784	0.0503049	0.0480948	0.0813412	0.117543	0.295178	0.295178		0.375714	0.00354658	0.00340229	0.00248579	0.0163887	0.00141855	0.00206051	0.00207296	0.00771322	0.00330407	0.101951	0.0354078	0	0	0	0	0	0
10095	KLHL34	HGNC:26634	ENSG00000185915	ENSGALG00000016388	ENSACAG00000016729	ENSNSUG00000011953	Therian	0	662.84	0	0.496								0.0983897	0.167303	0.220379		0.116663					0.00918263	0.00267738	0.00193523	0.00231522	0.00202244	0.00462314	0.00300104	0.00465546	0.00842714			0	0	0	0	0	0
10096	SMPX	HGNC:11122	ENSG00000091482	ENSGALG00000019157	ENSACAG00000016732	ENSNSUG00000011952	Therian	0	662.84	0	0.259			0.046					0.145322	0.236879	0.17207	0.089518	0.224392	0.29024	0.29024			0.00012758	0.000300956	0.00067802		0.000175584	0.014429	0.000163282	0.0338516	0.00139174	0.0724649	0.257974	0	0	0	0	0	0
10097	MBTPS2	HGNC:15455	ENSG00000012174	ENSGALG00000016382	ENSACAG00000016735	ENSNSUG00000011951	Therian	0	662.84	0	0.203			0.231138					0.0403727	0.174064	0.247395	0.29322	0.559678	0.659301	0.659301	0.3	1.75967	0.0131024	0.0318058	0.0360673	0.0397319	0.0339818	0.0272959	0.0184756	0.0213553	0.0619861	0.159987	0.125029	0	0	0	0	0	0
10098	YY2	HGNC:31684	ENSG00000230797			ENSNSUG00000007646	Therian	0	662.84	0	0.104			0.00682353	1		1		0.230219	0.0828516						0.9		0.159459	0.028823	0.0363184	0.0340051	0.0425847	0.028423	0.0221964					0	0	0	0	0	0
10099	SMS	HGNC:11123	ENSG00000102172	ENSGALG00000016379	ENSACAG00000016737	ENSNSUG00000011950	Therian	0	662.84	0	0.466			0.142815	8	1	5	1	0.0529055	0.138921	0.142586	0.428674	0.424016	0.620444	0.620444	5.1	84.9299	0.0140643	0.0489186	0.0359757	0.0332652	0.0214512	0.0279709	0.0211882	0.0184679	0.0653965	0.220748	0.0461563	0	0	0	0	0	0
10100	PHEX	HGNC:8918	ENSG00000102174	ENSGALG00000016375	ENSACAG00000007524	ENSNSUG00000011949	Therian	0	662.84	0	0.525			0.0732414					0.0551031	0.0828116	0.0931775	0.108442	0.116829			0.5	0.0856863	0.0104848	0.0291373	0.0219025	0.0063519	0.0612704	0.01647	0.0115907	0.119652	0.037885		0.0419399	0	0	0	0	0	0
10101	CBLL2	HGNC:26371	ENSG00000175809	ENSGALG00000007975	ENSACAG00000015209	ENSNSUG00000013476	Therian	0	662.84	0	0.041												0.453693					0.997384				0.321732							0	0	0	0	0	0
10102	PTCHD1	HGNC:26392	ENSG00000165186	ENSGALG00000016358	ENSACAG00000007519	ENSNSUG00000011948	Therian	0	662.84	0	0.442			0.18521	2	1	1	1	0.0435393	0.0149813			0.430212	0.281351	0.281351		4.18997	0.00487159	0.0648672	0.00417174	0.00760136	0.0550091	0.160413	0.0120189	0.0172877	0.0143271	0.0633381	0.538499	0	0	0	0	0	0
10103	PRDX4	HGNC:17169	ENSG00000123131	ENSGALG00000016357	ENSACAG00000007489	ENSNSUG00000011946	Therian	0	662.84	0	0.176								0.142061	0.0287594	0.149206	0.149535	0.457003	0.375097	0.375097	161.7	160.588	0.0431504	0.0205667	0.0284823	0.0113365	0.0206008	0.0103778	0.0182869	0.0135657	0.033165	0.13676	0.215196	0	0	0	0	0	0
10104	ACOT9	HGNC:17152	ENSG00000123130	ENSGALG00000016351	ENSACAG00000007472	ENSNSUG00000011945	Therian	0	662.84	0	0.134			0.00129032	1	1	1	1	0.236005	0.160804	0.115317	0.487969	0.389934	0.742321	0.742321	44.6	12.0619	0.0070732	0.0356015	0.0260577	0.0452518	0.0377814	0.0273585	0.0230606	0.00475293	0.0694411	0.336781	0.148916	0	0	0	0	0	0
10105	SAT1	HGNC:10540	ENSG00000130066	ENSGALG00000016348	ENSACAG00000007429	ENSNSUG00000011944	Therian	0	662.84	0	0.06			0.254667	2		1		0.0453187	0.0467128	0.0799087	0.157863	0.439149	0.292982	0.292982	91.7	79.8274	0.00669529	0.0288096	0.0108248	0.0921388	0.00810413	0.00994817	0.0168075	0.010437	0.0249356	0.0438977	0.0809252	0	0	0	1	0	0
10106	APOO	HGNC:28727	ENSG00000184831	ENSGALG00000016347		ENSNSUG00000011943	Therian	0	662.84	0	0.32			0.234					0.34075			0.350591	0.285608	0.853784	0.853784	46.8	85.9729	0.0231944	0.0151492	0.00893564	0.00285577	0.00910457	0.00868199	0.0106001			0.185353	0.475999	0	0	0	0	0	0
10107	CXorf58	HGNC:26356	ENSG00000165182			ENSNSUG00000007913	Therian	0	662.84	0	0.104			0.007								0.0625		0.25	0.25			0.592455	0.00643161	0.0121901	0.0185839	0.00856223	0.00972487	0.0119191				0.787946	0	0	0	0	0	0
10108	KLHL15	HGNC:29347	ENSG00000174010	ENSGALG00000016345	ENSACAG00000007405	ENSNSUG00000011943	Therian	0	662.84	0	0.508			0.344842	1		1	1	0.00682368	0.00421496	0.0168391	0.0625	0.513755	0.409243	0.409243	10.1	12.4087	0.112766	0.0239061	0.037125	0.209681	0.0255512	0.0273932	0.015699	0.00618506	0.0267716	0.167455	0.0890598	0	0	0	0	0	0
10109	EIF2S3	HGNC:3267	ENSG00000130741	ENSGALG00000016340	ENSACAG00000007288	ENSNSUG00000011940	Therian	484.9	662.84	0.731549	0.861			0.0800556					0.0040059	0.0111504	0.0195536	0.3568	0.708858	0.669756	0.669756	133.6	266.945	0.00798891	0.026595	0.0402469	0.0400489	0.0277591	0.0355127	0.026184	0.0149984	0.0345088	0.37327	0.255952	0	0	0	1	0	1
10110	ZFX	HGNC:12869	ENSG00000005889	ENSGALG00000016327	ENSACAG00000007227	ENSNSUG00000011939	Therian	662.84	662.84	1	0.379			0.160033	4		1		0.0532674	0.0348746	0.0556869	0.282663	0.458724	0.625909	0.625909	3.3	13.5789	0.0202698	0.0508069	0.0341544	0.0662063	0.0336761	0.035535	0.022615	0.064314	0.0617267	0.399419	0.14316	0	0	0	1	0	1
10111	SLC51A	HGNC:29955		ENSGALG00000016326		ENSNSUG00000007527	Therian	0	662.84	0		-2.04168	-2.16389	0.108					0.193594	0.375564			0.174268			0.2	0.229058	0.0457826	0.00240901	0.0179416	0.00293244	0.0030762	0.00343968	0.00295597	0.273346	0.0733334			0	0	0	0	0	0
10112	SUPT20HL2	HGNC:31797	ENSG00000223611			ENSNSUG00000004334	Therian	0	662.84	0																													0	0	0	0	0	0
10113	SUPT20HL1	HGNC:30773	ENSG00000223731			ENSNSUG00000009992	Therian	0	662.84	0																													0	0	0	0	0	0
10114	PDK3	HGNC:8811	ENSG00000067992	ENSGALG00000016323	ENSACAG00000007063	ENSNSUG00000011435	Therian	0	662.84	0	0.064			0.123773					0.028966	0.0443727	0.0642704	0.224538	0.306916	0.670246	0.670246	6.7	16.4259	0.0567711	0.0203605	0.0148578	0.0544325	0.0119546	0.0376811	0.0202199	0.0818125	0.0647666	0.334837	0.121509	0	0	0	0	0	0
10115	PCYT1B	HGNC:8755	ENSG00000102230	ENSGALG00000016318	ENSACAG00000007032	ENSNSUG00000011061	Therian	0	662.84	0	0.166			0.201571	1	1			0.0270483	0.233156	0.130226	0.194364	0.113633	0.262407	0.262407		5.57858	0.141195	0.0162039	0.0131869	0.00902813	0.0170199	0.0146807	0.00371726	0.589564	0.00385355	0.0199444	0.068242	0	0	0	0	0	0
10116	POLA1	HGNC:9173	ENSG00000101868	ENSGALG00000016312	ENSACAG00000008221	ENSNSUG00000011039	Therian	0	662.84	0	0.996			0.0683	1	1	1	1	0.209088	0.163922	0.173618	0.358956	0.330628	0.374225	0.374225	6.3	37.1228	0.0247861	0.0298603	0.0372932	0.0377771	0.031447	0.0358176	0.0335821	0.0997525	0.0841779	0.175189	0.0983174	0	0	0	0	0	0
10117	ARX	HGNC:18060	ENSG00000004848		ENSACAG00000008268	ENSNSUG00000011038	Therian	0	662.84	0	0.778			0.448333			12	1	0.0258436	0.0834593		0.0625		0.262929	0.262929	0.5	0.796672	0.100517	0.00499203	0.612803	0.000815514	0.000275096	0.000206941	0.000567891			0.0403428	0.0797158	1	0	0	0	0	0
10118	MAGEB18	HGNC:28515	ENSG00000176774			ENSNSUG00000009074	Therian	0	662.84	0	0.046			0.0402					0.577928									1											0	0	0	0	0	0
10119	MAGEB6	HGNC:23796	ENSG00000176746			ENSNSUG00000016270	Therian	0	662.84	0	0.057								0.476244			0.0625				0.3		1											0	0	0	0	0	0
10120	MAGEB5	HGNC:23795	ENSG00000188408			ENSNSUG00000015803	Therian	0	662.84	0	0.02								0.521243									0.967739											0	0	0	0	0	0
10121	DCAF8L1	HGNC:31810	ENSG00000189186		ENSACAG00000015708	ENSNSUG00000007849	Therian	0	662.84	0				0.00107143					0.433435									0.993415		0.255434									0	0	0	0	0	0
10122	MAGEB10	HGNC:25377	ENSG00000177689			ENSNSUG00000016601	Therian	0	662.84	0	0.042			0.0247692								0.0625				6.2		0.15871	0.036113	0.0246766	0.0207927	0.0276081	0.0179131	0.0292101					0	0	0	0	0	0
10123	IL1RAPL1	HGNC:5996	ENSG00000169306	ENSGALG00000016288	ENSACAG00000007187	ENSNSUG00000012364	Therian	0	662.84	0	0.705			0.257792	14	1	13	1	0.0186863	0.0553191		0.0882629	0.160019	0.265584	0.265584	0.1	0.383676	0.013403	0.00898372	0.0108565	0.00188312	0.00297708	0.013057	0.00656343	0.0073753	0.0184625	0.0383342	0.0465628	0	0	0	0	0	0
10124	MAGEB1	HGNC:6808	ENSG00000214107			ENSNSUG00000013696	Therian	0	662.84	0	0.042								0.532623							28.3		1											0	0	0	0	0	0
10125	NR0B1	HGNC:7960	ENSG00000169297	ENSGALG00000016287	ENSACAG00000007218	ENSNSUG00000012362	Therian	0	662.84	0	0.648			0.0125714	1	1	1	1	0.242918	0.330387	0.102819		0.260284	0.268724	0.268724		4.76055	0.27339	0.000246907	0.0619425	0.00195121	0.000344613	0.00110274	0.0245711	0.00875489	0.241677	0.0696768	0.708153	0	0	0	0	1	0
10126	TASL	HGNC:25667	ENSG00000120280	ENSGALG00000016286	ENSACAG00000007229	ENSNSUG00000012360	Therian	0	662.84	0	0.171			0.03416					0.182588	0.257284	0.237628	0.0803917	0.181781					0.00859045	0.0116518	0.00761367	0.0327918	0.00803147	0.00763507	0.0135183		0.0166839		0.187387	0	0	0	1	0	0
10127	GK	HGNC:4289	ENSG00000198814	ENSGALG00000016285	ENSACAG00000007235	ENSNSUG00000012335	Therian	0	662.84	0				0.11359					0.0390215	0.25232	0.115935	0.253535	0.192701	0.738845	0.738845	0.6	12.8484	0.0166738	0.00978097	0.00961379	0.0108624	0.00742733	0.00862863	0.0105138	0.172608	0.00598592	0.260476	0.0237188	0	0	0	0	0	0
10128	TAB3	HGNC:30681	ENSG00000157625	ENSGALG00000016284	ENSACAG00000007257	ENSNSUG00000012334	Therian	96	662.84	0.144831				0.192486	13	1	12	1	0.0889571	0.072573	0.129607	0.334717	0.612072	0.467255	0.467255	0.9	31.2157	0.0380818	0.0358564	0.0268815	0.0350901	0.0565614	0.0187969	0.0319773	0.040343	0.0342137	0.246555	0.126311	0	0	0	0	0	0
10129	FTHL17	HGNC:3987	ENSG00000132446		ENSACAG00000027008	ENSNSUG00000005736	Therian	0	662.84	0	0.047			0.000333333					0.0269345							1.6		0.986208											0	0	0	0	0	0
10130	DMD	HGNC:2928	ENSG00000198947	ENSGALG00000016281	ENSACAG00000007269	ENSNSUG00000011968	Therian	0	662.84	0	0.341			0.186853	24	1	23	1	0.13734	0.0242976		0.162649	0.47782	0.429509	0.429509	13.8	4.9454	0.00709628	0.0273374	0.0158505	0.0494591	0.0354323	0.0542288	0.00610095	0.0327792	0.0746062	0.108101	0.138973	1	0	0	0	0	0
10131	TMEM47	HGNC:18515	ENSG00000147027	ENSGALG00000016272	ENSACAG00000016078	ENSNSUG00000006657	Therian	0	662.84	0	0.327			0.108194	9		5	1	0.0181882		0.06875	0.0625	0.415972	0.255815	0.255815		1.74216	0.00274789	0.0441621	0.0170441	0.0745637	0.045278	0.0307631	0.0152376			0.0141677	0.762322	0	0	0	0	0	0
10132	Siah1b	MGI:108063	ENSG00000230227			ENSNSUG00000014254	Therian	0	662.84	0																													0	0	0	0	0	0
10133	MAGEB16	HGNC:21188	ENSG00000189023			ENSNSUG00000010384	Therian	0	662.84	0									0.384817							0.2		1											0	0	0	0	0	0
10134	CFAP47	HGNC:26708	ENSG00000165164	ENSGALG00000016268	ENSACAG00000016075	ENSNSUG00000001930	Therian	0	662.84	0	0.048			0.00466667					0.349467	0.506094				0.266931	0.266931		1.14408								0.342828	0.184857	0.0319548	0.563655	0	0	0	0	0	0
10135	FAM47C	HGNC:25301	ENSG00000198173			ENSNSUG00000016890	Therian	0	662.84	0	0.034								0.647219									0.874365	0.00309607		0.0127475								0	0	0	0	0	0
10136	PRRG1	HGNC:9469	ENSG00000130962	ENSGALG00000016266	ENSACAG00000014923	ENSNSUG00000008642	Therian	0	662.84	0	0.191			0.1512	3	1	2		0.0992041		0.370585		0.33112	0.556427	0.556427	17.1	16.4499	0.0049965	0.0128992	0.0119937	0.0230742	0.0175583	0.00919804	0.0149017	0.0660004	0.170202	0.449295	0.0848303	0	0	0	0	0	0
10137	Fthl17f	MGI:3642941	ENSG00000250349		ENSACAG00000014546	ENSNSUG00000019903	Therian	0	662.84	0									0.152435		0.0249442																		0	0	0	0	0	0
10138	Fthl17b	MGI:3642940	ENSG00000219186			ENSNSUG00000004092	Therian	0	662.84	0																													0	0	0	0	0	0
10139	Fthl17c	MGI:3705221	ENSG00000219186			ENSNSUG00000004092	Therian	0	662.84	0																													0	0	0	0	0	0
10140	LANCL3	HGNC:24767	ENSG00000147036	ENSGALG00000016265	ENSACAG00000014915	ENSNSUG00000011955	Therian	0	662.84	0	0.057			0.10512	7	1	3	1	0.0381282	0.0638958			0.233898	0.267964			3.92533	0.0229158	0.016599	0.00579468	0.00841822	0.0118897	0.058586	0.0645905	0.0101051	0.00538431	0.0670402		0	0	0	0	0	0
10141	XK	HGNC:12811	ENSG00000047597	ENSGALG00000016262	ENSACAG00000014890	ENSNSUG00000008641	Therian	0	662.84	0	0.444			0.0435714					0.150052	0.106988	0.105222		0.156587	0.256101	0.256101		1.12627	0.0165261	0.0110052	0.0032225	0.00419595	0.00619981	0.0761631	0.0131003	0.00584943	0.0108257	0.0153944	0.0181552	0	0	0	0	0	0
10142	CYBB	HGNC:2578	ENSG00000165168	ENSGALG00000016261	ENSACAG00000014880	ENSNSUG00000008640	Therian	0	662.84	0	0.163			0.05356					0.0824282	0.0244432	0.124378	0.0747813	0.155579	0.31366	0.31366		16.5209	0.00326786	0.0088525	0.0150158	0.00866633	0.0100683	0.0144969	0.00968164	0.0317373	0.00547571	0.159981	0.181263	0	0	0	0	0	0
10143	DYNLT3	HGNC:11694	ENSG00000165169	ENSGALG00000016259	ENSACAG00000014841	ENSNSUG00000008639	Therian	0	662.84	0	0.069			0.001875					0.0831335	0.0253092	0.208285	0.342056	0.614227	0.531431		11.5	11.1319	0.012854	0.0232566	0.0167325	0.0473128	0.025404	0.0189992	0.0280832	0.0128512	0.0717558	0.470428		0	0	0	0	0	0
10144	H2AP	HGNC:18417	ENSG00000187516			ENSNSUG00000016661	Therian	0	662.84	0	0.029			0.0065					0.352497																				0	0	0	0	0	0
10145	H2al3	MGI:1922521	ENSG00000229674			ENSNSUG00000011870	Therian	0	662.84	0																													0	0	0	0	0	0
10146	SYTL5	HGNC:15589	ENSG00000147041	ENSGALG00000016258	ENSACAG00000014773	ENSNSUG00000019905	Therian	0	662.84	0	0.191			0.0594286					0.195402	0.146022		0.0625	0.210123	0.288609	0.288609	0.2	0.151658	0.00130295	0.0019095	0.000260965	0.000839441	0.00326224	0.000660041	0.00417491	0.0932663	0.247673	0.092436	0.0155289	0	0	0	0	0	0
10147	SRPX	HGNC:11309	ENSG00000101955	ENSGALG00000016256	ENSACAG00000014714	ENSNSUG00000005184	Therian	0	662.84	0	0.636			0.00471429			1	1	0.0872375	0.0242104	0.206952	0.316431	0.268981	0.419729	0.419729	1.1		0.00212783	0.00828844	0.00599349	0.0505702	0.024984	0.0373556	0.00907981			0.226794	0.186899	0	0	0	0	0	0
10148	RPGR	HGNC:10295	ENSG00000156313	ENSGALG00000016255	ENSACAG00000014702	ENSNSUG00000005657	Therian	0	662.84	0	0.529			0.0095					0.443239	0.346989		0.485916	0.158176	0.492537	0.492537	9.2	0.999334	0.0337822	0.0211008	0.0157028	0.0431502	0.0366201	0.0230887	0.0210296			0.141499	0.157509	0	0	0	1	0	0
10149	OTC	HGNC:8512	ENSG00000036473	ENSGALG00000016254	ENSACAG00000014619	ENSNSUG00000005184	Therian	0	662.84	0	0.182			0.0585556					0.0979644	0.128395	0.127207	0.102814		0.272636	0.272636			0.00441847	0.000203906	0.000355711	0.00317232	0.00381206	0.000891209	0.000904592			0.0484343	0.0382391	0	0	0	0	0	0
10150	TSPAN7	HGNC:11854	ENSG00000156298	ENSGALG00000016251	ENSACAG00000014546	ENSNSUG00000019903	Therian	0	662.84	0	0.24			0.022	7	1	4	1	0.0252905		0.0249442	0.190703	0.173352	0.259319	0.259319	1.7	4.39928	0.000854734	0.00329882	0.00332025	0.0434775	0.00966971	0.00386985	0.00415661	0.0200516	0.0140918	0.0120709	0.000114835	0	0	0	0	0	0
10151	MID1IP1	HGNC:20715	ENSG00000165175	ENSGALG00000016249	ENSACAG00000014537	ENSNSUG00000019896	Therian	0	662.84	0	0.289			0.2584					0.074663		0.0419818	0.192867	0.111111	0.479026	0.479026	0.5	46.6645	0.0193605	0.0123905	0.0250117	0.0261323	0.013537	0.0326354	0.0158322			0.521893	0.0675225	0	0	0	0	0	0
10152	BCOR	HGNC:20893	ENSG00000183337	ENSGALG00000016245	ENSACAG00000014487	ENSNSUG00000019896	Therian	173	662.84	0.260998	0.299			0.296889	9	1	4	1	0.143869		0.207648	0.238526	0.361671	0.616135	0.616135	10.1	19.6924	0.0321895	0.0290514	0.0464761	0.0817334	0.033798	0.0300805	0.0257636	0.110372	0.0185208	0.199905	0.0960534	0	0	0	0	0	0
10153	ATP6AP2	HGNC:18305	ENSG00000182220	ENSGALG00000016241	ENSACAG00000014415	ENSNSUG00000019894	Therian	0	662.84	0	0.131			0.43975					0.0762195	0.147498	0.05145	0.397708	0.42618	0.359596	0.359596	76.2	75.7658	0.0132087	0.0255954	0.0243733	0.0302511	0.0329183	0.0199779	0.0204411	0.00732878	0.0261665	0.146188	0.0543729	0	0	0	1	0	0
10154	MPC1L	HGNC:44205	ENSG00000238205			ENSNSUG00000019977	Therian	0	662.84	0																													0	0	0	0	0	0
10155	CXorf38	HGNC:28589	ENSG00000185753		ENSACAG00000014405	ENSNSUG00000013652	Therian	0	662.84	0	0.12			0.0352222					0.166777					0.755617		5.4		0.00772931	0.0202911	0.0276063	0.0267255	0.025071	0.0151754	0.0273994			0.271954		0	0	0	1	0	0
10156	MED14	HGNC:2370	ENSG00000180182	ENSGALG00000016238	ENSACAG00000014283	ENSNSUG00000019760	Therian	20.9	683.74	0.0305672	0.612			0.276077	12	1	13	1	0.0466504	0.0374424	0.0525954	0.433469	0.500073	0.939533	0.939533	6.4	27.4885	0.0161959	0.0252766	0.0291484	0.0360729	0.0254438	0.0218794	0.0301122	0.047572	0.0518735	0.26609	0.184889	0	0	0	0	0	0
10157	USP9X	HGNC:12632	ENSG00000124486	ENSGALG00000016236	ENSACAG00000017937	ENSNSUG00000019331	Therian	656.14	662.84	0.989892	0.477			0.186471	25	1	22	1	0.0205011	0.00568788	0.00941265	0.544609	0.439113	0.545595	0.545595	8.3	57.7133	0.0375577	0.0242981	0.0233542	0.0298038	0.0280032	0.0283198	0.0241416	0.0554182	0.0425737	0.197596	0.111718	1	0	0	1	0	1
10158	DDX3X	HGNC:2745	ENSG00000215301	ENSGALG00000016231	ENSACAG00000017928	ENSNSUG00000019320	Therian	662.84	662.84	1	0.719			0.338237	55	1	51	1	0.0191401	0.0289436	0.049496	0.471726	0.51611	0.736903	0.736903	96.5	429.282	0.0341515	0.023989	0.0263032	0.134374	0.0283713	0.0307661	0.0259215	0.0256715	0.0378367	0.27785	0.086127	1	0	0	1	0	1
10159	NYX	HGNC:8082	ENSG00000188937	ENSGALG00000016228	ENSACAG00000017927	ENSNSUG00000019319	Therian	0	662.84	0	0.183			0.0171667					0.0773416	0.0551961	0.162855		0.152967	0.438265			0.503177	0.579146									0.1506		0	0	0	0	0	0
10160	CASK	HGNC:1497	ENSG00000147044	ENSGALG00000016226	ENSACAG00000017924	ENSNSUG00000019311	Therian	0	662.84	0	0.996			0.186143	24	1	25	1	0.00260552	0.0118483	0.0381558	0.337574	0.340075	0.54338	0.54338	0.7	43.6192	0.00846647	0.0212954	0.0250046	0.0329951	0.0244413	0.0178184	0.0302872			0.152925	0.0807517	1	0	0	0	0	0
10161	GPR34	HGNC:4490	ENSG00000171659	ENSGALG00000016227	ENSACAG00000017926	ENSNSUG00000000136	Therian	0	662.84	0	0.26			0.0174783					0.0877826	0.157057		0.19294	0.347377			0.2	0.014154	0.00800944	0.0147437	0.0178696	0.0206009	0.0169631	0.0149528	0.0118389					0	0	0	0	0	0
10162	GPR82	HGNC:4533	ENSG00000171657			ENSNSUG00000008153	Therian	0	662.84	0	0.263			0.0120714					0.284297	0.241223							0.0244016	0.0192029	0.0209487	0.0139195	0.0262492	0.0181818	0.0166765	0.0187658					0	0	0	0	0	0
10163	MAOA	HGNC:6833	ENSG00000189221	ENSGALG00000016224	ENSACAG00000017918	ENSNSUG00000019311	Therian	0	662.84	0	0.072			0.03075					0.125022	0.24479	0.158025	0.0625	0.477985	0.534463	0.534463	1.5	0.77023	0.001951	0.0324091	0.0209234	0.0372267	0.0134817	0.0323272	0.0189478	0.00226277	0.00397884	0.280458	0.0775089	0	0	0	0	0	0
10164	MAOB	HGNC:6834	ENSG00000069535	ENSGALG00000016223	ENSACAG00000017903	ENSNSUG00000019305	Therian	0	662.84	0	0.458			0.015					0.131519	0.0890585	0.165877	0.352194	0.322166	0.304481	0.304481		0.878577	0.00419169	0.0663991	0.0571454	0.190264	0.0586101	0.0181686	0.00832049			0.0224273	0.0257932	0	0	0	1	0	0
10165	NDP	HGNC:7678	ENSG00000124479	ENSGALG00000016222		ENSNSUG00000009796	Therian	0	662.84	0	0.353			0.0932857					0.0633592	0.0527523		0.115171	0.266565	0.252361	0.252361		1.29148	0.0025251	0.0197496	0.0911662	0.121424	0.0186542	0.000699007	0.0114593	0.0108886	0.0865367	0.00935504	0.0692953	0	0	0	0	0	0
10166	EFHC2	HGNC:26233	ENSG00000183690	ENSGALG00000016221	ENSACAG00000017897	ENSNSUG00000019304	Therian	0	662.84	0	0.09			0.0189167	1	1			0.316702	0.447902	0.13691	0.189409	0.113527	0.260688	0.260688	0.5	0.649147	0.175227	0.0666173	0.0264001	0.0038975	0.047351	0.0255392	0.0293259	0.4045	0.269206	0.0409998	0.803129	0	0	0	0	0	0
10167	FUNDC1	HGNC:28746	ENSG00000069509	ENSGALG00000016219	ENSACAG00000017894	ENSNSUG00000007952	Therian	0	662.84	0	0.151			0.025	2	1	2	1	0.0496313	0.238675	0.0389535	0.454394	0.257288	0.706433	0.706433	109.8	14.0869	0.0232805	0.0183248	0.0226251	0.0151865	0.0180734	0.0120431	0.0220436			0.276199	0.268722	0	0	0	0	0	0
10168	DUSP21	HGNC:20476	ENSG00000189037	ENSGALG00000007765	ENSACAG00000009785	ENSNSUG00000006287	Therian	0	662.84	0	0.043								0.149149				0.113918				0.764825	0.989706							0.819231	0.0228003			0	0	0	0	0	0
10169	KDM6A	HGNC:12637	ENSG00000147050	ENSGALG00000016217	ENSACAG00000017877	ENSNSUG00000007952	Therian	662.84	662.84	1				0.379467	24	1	20	1	0.0911425	0.108723	0.13141	0.45198	0.279761	0.762279	0.762279	5.1	15.3142	0.0310912	0.0283864	0.0328095	0.0494624	0.0269536	0.0226615	0.032866	0.105851	0.0248172	0.286163	0.0955817	0	0	1	1	0	0
10170	DIPK2B	HGNC:25866	ENSG00000147113	ENSGALG00000016215	ENSACAG00000017875	ENSNSUG00000007910	Therian	0	662.84	0	0.112			0.0621429					0.264532	0.0717401	0.236109	0.0625	0.259064	0.598895	0.598895		0.053054	0.00486928	0.0270638	0.0120667	0.124579	0.0492426	0.0144952	0.0176209	0.00390911	0.0124434	0.417435	0.0951558	0	0	0	0	0	0
10171	ZNF674	HGNC:17625	ENSG00000251192			ENSNSUG00000008067	Therian	0	662.84	0	0.174			0.0233043												1.2		0.0176864	0.0420174	0.0284206	0.0256687	0.0248901	0.0215059	0.0217141					0	0	0	0	0	0
10172	CHST7	HGNC:13817	ENSG00000147119		ENSACAG00000027845	ENSNSUG00000007244	Therian	0	662.84	0	0.421			0.15896					0.0694459			0.0625		0.356461	0.356461	2.2		0.0142229	0.0158805	0.103828	0.0311083	0.0189778	0.0112607	0.0295819			0.140558	0.152154	0	0	0	1	0	0
10173	SLC9A7	HGNC:17123	ENSG00000065923	ENSGALG00000016734	ENSACAG00000012110	ENSNSUG00000007263	Therian	0	662.84	0	0.476			0.167157					0.0547226	0.0723307		0.197329	0.262504	0.46918	0.46918	0.4	5.08011	0.00529724	0.0146433	0.0273268	0.00566357	0.0038942	0.00435021	0.0135746	0.0114908	0.0602473	0.0565375	0.0581904	0	0	0	0	0	0
10174	RP2	HGNC:10274	ENSG00000102218	ENSGALG00000016728	ENSACAG00000012096	ENSNSUG00000007266	Therian	0	662.84	0	0.127			0.058					0.112283	0.185999	0.127244	0.0625	0.34085	0.786977	0.786977	5.2	5.95109	0.0213014	0.0198636	0.0263625	0.0248625	0.0250936	0.0197573	0.0314655	0.0182802	0.014834	0.317671	0.150977	0	0	0	0	0	0
10175	JADE3	HGNC:22982	ENSG00000102221	ENSGALG00000016727	ENSACAG00000011996	ENSNSUG00000007267	Therian	0	662.84	0	0.377			0.107	5	1	3	1	0.238361	0.051752	0.0955914	0.0625	0.340534	0.555957	0.555957		14.0032								0.0306399	0.0242505	0.297925	0.0541918	0	0	0	0	0	0
10176	RGN	HGNC:9989	ENSG00000130988	ENSGALG00000016724	ENSACAG00000011909	ENSNSUG00000007275	Therian	0	662.84	0	0.104								0.138237	0.163327	0.124834	0.136767	0.171477	0.291228	0.291228	0.3	305.939	0.00508105	0.0162535	0.0271153	0.0461974	0.00631634	0.00939693	0.00424697	0.0299355	0.00121317	0.040067	0.027368	0	0	0	0	0	0
10177	NDUFB11	HGNC:20372	ENSG00000147123			ENSNSUG00000004021	Therian	0	662.84	0	0.09			0.006					0.470819			0.328388				283.3		0.00816794	0.0278411	0.0166198	0.0116435	0.0165917	0.021801	0.0220212					0	0	0	0	0	0
10178	RBM10	HGNC:9896	ENSG00000182872		ENSACAG00000005527	ENSNSUG00000004028	Therian	164	826.84	0.198346	0.142			0.185					0.0620767		0.0892637	0.297959		0.790975	0.790975	25.4		0.0108817	0.0320859	0.031952	0.0281488	0.0248881	0.0226958	0.0288159			0.235985	0.225372	0	0	0	0	0	1
10179	UBA1	HGNC:12469	ENSG00000130985		ENSACAG00000005270	ENSNSUG00000000107	Therian	586.9	826.84	0.709811	0.441			0.0195					0.0491273		0.0505131	0.398863		0.702109	0.702109	101.6		0.0286838	0.0270383	0.0245246	0.0191054	0.0279755	0.0210269	0.0311588			0.265164	0.0807204	0	0	0	1	0	1
10180	CDK16	HGNC:8749	ENSG00000102225		ENSACAG00000005069	ENSNSUG00000019517	Therian	0	826.84	0				0.212889					0.0356527		0.0901346	0.47519		0.373736	0.373736	24.1		0.0296752	0.0174549	0.0198109	0.0163582	0.0168728	0.0142715	0.020334			0.144299	0.0678577	0	0	0	0	0	0
10181	USP11	HGNC:12609	ENSG00000102226		ENSACAG00000004813	ENSNSUG00000019516	Therian	0	826.84	0	0.19								0.152459		0.111247	0.360347		0.781452	0.781452	18.9		0.0350873	0.0211451	0.0349189	0.0360019	0.0224953	0.0156193	0.0130416			0.319917	0.065552	0	0	0	0	0	0
10182	ZNF157	HGNC:12942	ENSG00000147117			ENSNSUG00000007910	Therian	0	826.84	0	0.188			0.0068												4		0.0314185	0.0133976	0.0245633	0.00405294	0.0201277	0.0197472	0.0186577				0.127683	0	0	0	0	0	0
10183	ZNF41	HGNC:13107	ENSG00000147124			ENSNSUG00000004021	Therian	0	826.84	0	0.125			0.0484074					0.195437					0.802328		1.5		0.0119981	0.021435	0.0220236	0.0203989	0.02419	0.0218302	0.0236839			0.283608		0	0	0	0	0	0
10184	ARAF	HGNC:646	ENSG00000078061		ENSACAG00000011249	ENSNSUG00000001214	Therian	0	826.84	0	0.969			0.078875			1		0.0492016		0.143727	0.514524		0.744743		12.3		0.00979845	0.0345969	0.0274195	0.0375247	0.0275489	0.0249591	0.0234957			0.305322		0	0	0	0	0	0
10185	SYN1	HGNC:11494	ENSG00000008056	ENSGALG00000004955	ENSACAG00000025579	ENSNSUG00000007751	Therian	0	826.84	0	0.598			0.178375					0.0558517	0.0580998		0.0643853	0.111479	0.253447	0.253447		0.0281338	0.0020134	0.00111009	0.00226156	0.000739209	0.00059778	0.00189397	0.000465848	0.00540805	0.0027899	0.00920806	0.0192645	0	0	0	0	0	0
10186	TIMP1	HGNC:11820	ENSG00000102265		ENSACAG00000029444	ENSNSUG00000019511	Therian	0	826.84	0	0.447			0.159					0.216892		0.370058	0.384767				18.1		0.0132411	0.0484126	0.0495318	0.0176172	0.0192688	0.00954078	0.0119989				0.302328	0	0	0	0	0	0
10187	CFP	HGNC:8864	ENSG00000126759	ENSGALG00000003236	ENSACAG00000010932	ENSNSUG00000014766	Therian	0	826.84	0	0.122								0.255223		0.277786	0.0682533	0.115144	0.312606	0.312606	0.1		0.00296658	0.00340438	0.0107767	0.0753792	0.00717692	0.0132803	0.00592569			0.0628841	0.231973	0	0	0	0	0	0
10188	ELK1	HGNC:3321	ENSG00000126767		ENSACAG00000004726	ENSNSUG00000019514	Therian	0	826.84	0	1			0.0191351					0.16765		0.204881	0.301923		0.301017	0.301017	9.4		0.0287352	0.0194067	0.0561875	0.0451079	0.021992	0.0153688	0.0166419			0.0799525	0.0895787	0	0	0	0	0	0
10189	UXT	HGNC:12641	ENSG00000126756		ENSACAG00000004754	ENSNSUG00000019515	Therian	0	826.84	0	0.576								0.261421		0.134753	0.509939		0.538003	0.538003	488.2		0.0133727	0.0290775	0.0419572	0.0259462	0.0232292	0.0204649	0.0247919			0.464682	0.533344	0	0	0	0	0	0
10190	CXXC1P1	HGNC:27864	ENSG00000187893			ENSNSUG00000006854	Therian	0	826.84	0																													0	0	0	0	0	0
10191	ZNF81	HGNC:13156	ENSG00000197779			ENSNSUG00000001254	Therian	0	826.84	0	0.138			0.0432619					0.374432									0.0110883	0.0294491	0.0259705	0.032538	0.0270505	0.0207609	0.0251801					0	0	0	0	0	0
10192	ZNF182	HGNC:13001	ENSG00000147118			ENSNSUG00000007910	Therian	0	826.84	0				0.01575					0.13386					0.676896	0.676896	3.1		0.0145305	0.0214298	0.0294601	0.0511763	0.0248391	0.021306	0.0178825			0.245875	0.126741	0	0	0	0	0	0
10193	ZNF630	HGNC:28855	ENSG00000221994			ENSNSUG00000005676	Therian	0	826.84	0				0.001												0.9		0.00529704	0.0339937	0.0250419	0.0706135	0.0226527	0.0218788	0.0180608					0	0	0	0	0	0
10194	SPACA5	HGNC:31353	ENSG00000171489		ENSACAG00000029160	ENSNSUG00000019994	Therian	0	826.84	0	0.188								0.373362									0.539429	0.0112341	0.032011	0.0138316	0.0239342	0.0289473	0.0212768				0.493957	0	0	0	0	0	0
10195	SSX5	HGNC:11339	ENSG00000165583			ENSNSUG00000008223	Therian	0	826.84	0	0.062								0.522029							5.4		0.536049	0.00533188		0.0793358	0.0216394	0.030855	0.00621932					0	0	0	0	0	0
10196	SSX1	HGNC:11335					Therian	0	826.84	0				0.0006					0.532158							4.5		0.926869		0.0415619	0.0266877	0.0455331	0.0152312						0	0	0	0	0	0
10197	SSX3	HGNC:11337					Therian	0	826.84	0	0.083			0.0005					0.564279							9.1		0.932508	0.00165445	0.0223697		0.0242071	0.0185271	0.0281272					0	0	0	0	0	0
10198	SSX4	HGNC:11338					Therian	0	826.84	0				0.015					0.491245									0.896022			0.163689								0	0	0	0	0	0
10199	SSX4B	HGNC:16880					Therian	0	826.84	0				0.000666667					0.491245									0.896022			0.163689								0	0	0	0	0	0
10200	SLC38A5	HGNC:18070	ENSG00000017483	ENSGALG00000022486	ENSACAG00000006254	ENSNSUG00000012243	Therian	0	826.84	0	0.066			0.095					0.137053		0.135688	0.221389				0.1	0.173209	0.0021053	0.00795681	0.0154403	0.0011583	0.00669638	0.0013753	0.0232074					0	0	0	0	0	0
10201	FTSJ1	HGNC:13254	ENSG00000068438		ENSACAG00000016605	ENSNSUG00000019832	Therian	0	826.84	0	0.057			0.0546667					0.122056		0.101676	0.564139		0.532686		30.5		0.0211508	0.0245377	0.0296925	0.0313419	0.0285431	0.0190466	0.0375573			0.136105		0	0	0	0	0	0
10202	PORCN	HGNC:17652	ENSG00000102312		ENSACAG00000016615	ENSNSUG00000019834	Therian	0	826.84	0	0.248			0.049					0.0477405		0.0552899	0.354524		0.494313	0.494313	1.9		0.0159569	0.0212545	0.0175341	0.0226961	0.0266886	0.0243643	0.029841			0.505752	0.0456131	0	1	0	0	0	0
10203	EBP	HGNC:3133	ENSG00000147155		ENSACAG00000016650	ENSNSUG00000019865	Therian	0	826.84	0	0.197			0.114					0.221902		0.16442	0.199619		0.452341		187.5	0.484149	0.0081034	0.017565	0.0117277	0.00642324	0.00927833	0.00827992	0.0490728			0.552681		0	0	0	0	0	0
10204	TBC1D25	HGNC:8092	ENSG00000068354		ENSACAG00000006227	ENSNSUG00000000006	Therian	0	826.84	0	0.413			0.153136					0.0592716		0.0790109	0.471056		0.313889	0.313889	6.5		0.0381408	0.024986	0.0226131	0.0336214	0.0249222	0.0300854	0.0241137			0.20354	0.0840151	1	0	0	0	0	0
10205	RBM3	HGNC:9900	ENSG00000102317		ENSACAG00000013718	ENSNSUG00000001070	Therian	0	826.84	0	0.278			0.0586296					0.0297608		0.0339933	0.320474		0.728572	0.728572	109.6		0.0100201	0.0314848	0.0381972	0.0610637	0.0290776	0.0260572	0.0351922			0.343137	0.372099	0	0	0	0	0	0
10206	WDR13	HGNC:14352	ENSG00000101940		ENSACAG00000006342	ENSNSUG00000000218	Therian	0	826.84	0	0.116			0.0551765					0.00633128		0.0183436	0.467939		0.558069	0.558069	10.6		0.00850529	0.0237431	0.0308497	0.0238269	0.0240912	0.0201409	0.0203684			0.253907	0.165464	0	0	0	0	0	0
10207	WAS	HGNC:12731	ENSG00000015285		ENSACAG00000006303	ENSNSUG00000000092	Therian	0	826.84	0	0.855			0.0415					0.14613		0.198052	0.108443		0.595284	0.595284			0.00497094	0.0115621	0.00903862	0.0392723	0.0110638	0.0118758	0.014574			0.326092	0.0558478	0	0	0	1	0	0
10208	SUV39H1	HGNC:11479	ENSG00000101945		ENSACAG00000006321	ENSNSUG00000000131	Therian	0	826.84	0	0.585			0.230643	2	1	1		0.0390647	0.00140706	0.07976	0.290504		0.48053	0.48053	12.3		0.0269072	0.0259201	0.0310899	0.0470269	0.0247965	0.0220007	0.0291147			0.150944	0.197086	0	0	0	1	0	0
10209	GLOD5	HGNC:33358	ENSG00000171433	ENSGALG00000007542	ENSACAG00000006422	ENSNSUG00000004119	Therian	0	826.84	0	0.162								0.180556	0.213612		0.102043	0.135425				0.0942372	0.00941632	0.00600617		0.00185354								0	0	0	0	0	0
10210	GATA1	HGNC:4170	ENSG00000102145		ENSACAG00000007871	ENSNSUG00000019787	Therian	0	826.84	0	0.34			0.222					0.139876		0.154752			0.378116	0.378116			0.185297	0.0212316	0.00868041	0.022481	0.0228222	0.0148272	0.0194171			0.661173	0.0351123	0	0	0	0	0	0
10211	HDAC6	HGNC:14064	ENSG00000094631		ENSACAG00000007892	ENSNSUG00000019782	Therian	0	826.84	0	0.132			0.0245					0.285714		0.231479	0.514125		0.508441	0.508441	3.8		0.0441965	0.021416	0.0337547	0.0401625	0.0273954	0.0184997	0.0225212			0.237515	0.194569	0	0	0	0	0	0
10212	ERAS	HGNC:5174	ENSG00000187682			ENSNSUG00000010261	Therian	0	826.84	0	0.268			0.147					0.215632									0.0337898	0.0157232	0.0204153	0.0282888	0.0249974	0.0146805	0.00568955					0	0	0	0	0	0
10213	PCSK1N	HGNC:17301	ENSG00000102109			ENSNSUG00000012776	Therian	0	826.84	0	0.112			0.053					0.114631			0.135658				0.3		0.00402849	0.00319154	0.000196732	0.00118161	0.00420869	0.00234376	0.000454008					0	0	0	0	0	0
10214	TIMM17B	HGNC:17310	ENSG00000126768		ENSACAG00000007764	ENSNSUG00000019793	Therian	0	826.84	0	0.17			0.459333					0.0398434		0.0497958	0.476211		0.496907	0.496907	91.1		0.0130863	0.0323505	0.0176396	0.0270319	0.0191993	0.0264503	0.0205942			0.149545	0.213646	0	0	0	0	0	0
10215	PQBP1	HGNC:9330	ENSG00000102103		ENSACAG00000007728	ENSNSUG00000019794	Therian	0	826.84	0	0.104				NA				0.0958793		0.0351703	0.436547		0.80314	0.80314	484.8		0.00733698	0.0280609	0.0377285	0.0418722	0.0252191	0.0292476	0.0238322			0.237918	0.338704	0	0	0	0	0	0
10216	SLC35A2	HGNC:11022	ENSG00000102100		ENSACAG00000007702	ENSNSUG00000019797	Therian	0	826.84	0	0.179			0.21975					0.0664297		0.108482	0.205324		0.680769	0.680769	23		0.0105578	0.0238751	0.0158542	0.00781048	0.0205779	0.0130729	0.030794			0.155789	0.0334461	0	0	0	0	0	0
10217	PIM2	HGNC:8987	ENSG00000102096		ENSACAG00000007632	ENSNSUG00000019823	Therian	0	826.84	0	0.696			0.3655					0.131545		0.139246	0.140523		0.449282		5.9		0.027383	0.0133621	0.0184297	0.030306	0.01022	0.0103691	0.0160742			0.12153		0	0	0	1	0	0
10218	OTUD5	HGNC:25402	ENSG00000068308		ENSACAG00000007596	ENSNSUG00000019824	Therian	82	826.84	0.0991728	0.299			0.161692					0.0202878		0.0130218	0.409548		0.821856	0.821856	18.5		0.0150593	0.0280654	0.0279074	0.0401267	0.0265565	0.0261828	0.0230272			0.278648	0.0589294	0	0	0	0	0	0
10219	KCND1	HGNC:6237	ENSG00000102057			ENSNSUG00000007988	Therian	0	826.84	0	0.386			0.260222					0.0382375					0.252106	0.252106	0.4		0.0210541	0.0189858	0.0216406	0.211039	0.0502062	0.0196516	0.0157131					0	0	0	0	0	0
10220	GRIPAP1	HGNC:18706	ENSG00000068400		ENSACAG00000016477	ENSNSUG00000019826	Therian	0	826.84	0	0.149			0.0661667					0.06389		0.0821038	0.519497		0.451015	0.451015	9.8		0.0149207	0.0189914	0.0211322	0.026676	0.0179062	0.0184249	0.0187093			0.1991	0.0649042	0	0	0	0	0	0
10221	TFE3	HGNC:11752	ENSG00000068323		ENSACAG00000022140	ENSNSUG00000019827	Therian	82	826.84	0.0991728	0.622			0.0740714					0.0460138		0.116956	0.383255		0.752439	0.752439	2.1		0.0067647	0.0310383	0.0296894	0.0708216	0.0332445	0.0258233	0.0216302			0.332253	0.136629	0	1	0	1	0	0
10222	CCDC120	HGNC:28910	ENSG00000147144		ENSACAG00000016561	ENSNSUG00000019828	Therian	0	826.84	0	0.168			0.304467					0.127756		0.12595			0.546968	0.546968	1.8		0.0184052	0.024494	0.0197017	0.0208297	0.0164237	0.0119656	0.0836218			0.195442	0.121634	0	0	0	1	0	0
10223	WDR45	HGNC:28912	ENSG00000196998		ENSACAG00000016580	ENSNSUG00000019830	Therian	0	826.84	0	0.233			0.0647692					0.214394		0.0366912			0.910597	0.910597	330.3		0.00491973	0.028551	0.0263512	0.0419963	0.0263566	0.0258232	0.0219125			0.259731	0.366337	1	0	0	0	0	0
10224	PRAF2	HGNC:28911	ENSG00000102050		ENSACAG00000004391	ENSNSUG00000008256	Therian	0	826.84	0	0.139			0.0831538					0.0816832							18.1		0.0236411	0.0268149	0.0274387	0.0199074	0.0406521	0.0226703	0.014721					0	0	0	0	0	0
10225	GPKOW	HGNC:30677	ENSG00000068394		ENSACAG00000016598	ENSNSUG00000019831	Therian	0	826.84	0	0.069			0.00241667					0.274455		0.146552	0.673002		0.616356	0.616356	70		0.0122966	0.025047	0.0235355	0.0266015	0.0275223	0.0280989	0.0247331			0.203983	0.129559	0	0	0	0	0	0
10226	MAGIX	HGNC:30006	ENSG00000017621		ENSACAG00000006254	ENSNSUG00000000035	Therian	0	826.84	0	0.031			0.0616923					0.412384		0.135688					1.1		0.00314275	0.0149426	0.00468364	0.00211796	0.00845854	0.00491578	0.0148313					0	0	0	0	0	0
10227	PLP2	HGNC:9087	ENSG00000102007		ENSACAG00000029625	ENSNSUG00000019769	Therian	0	826.84	0	0.286			0.1195					0.249293		0.182689	0.268519				1		0.00526343	0.0235369	0.0217215	0.0484715	0.0376788	0.0301997	0.0613605					0	0	0	0	0	0
10228	PRICKLE3	HGNC:6645	ENSG00000012211		ENSACAG00000011010	ENSNSUG00000019767	Therian	0	826.84	0	0.156			0.000125					0.0862936			0.22407		0.652353	0.652353	2.2		0.0084844	0.0336964	0.0221099	0.0390096	0.0356367	0.0278692	0.0529009			0.218409	0.253491	0	0	0	1	0	0
10229	SYP	HGNC:11506	ENSG00000102003		ENSACAG00000012914	ENSNSUG00000014888	Therian	96	826.84	0.116105	0.346			0.0676364					0.0432		0.232143	0.0659505		0.256514				0.000889227	0.000882111	0.00110491	0.000998906	0.00100547	0.00253984	0.000752627			0.0202667		0	0	0	0	0	0
10230	CACNA1F	HGNC:1393	ENSG00000102001		ENSACAG00000012965	ENSNSUG00000014884	Therian	0	826.84	0	0.231								0.0764956		0.104657			0.264905	0.264905			0.0187018	0.0118359	0.0038005	0.0167463	0.010238	0.00827301	0.0149958			0.0480234		0	0	0	0	0	0
10231	CCDC22	HGNC:28909	ENSG00000101997		ENSACAG00000013447	ENSNSUG00000014880	Therian	0	826.84	0	0.076								0.109199		0.1127	0.317523		0.429848	0.429848	0.6		0.00682526	0.0304641	0.0220864	0.0242496	0.0271748	0.02304	0.0271075			0.5816	0.146047	0	0	0	0	0	0
10232	FOXP3	HGNC:6106	ENSG00000049768			ENSNSUG00000013749	Therian	0	826.84	0	0.315			0.0826					0.115251			0.266105						0.089843	0.0168847	0.0178928	0.014252	0.0112514	0.00759928	0.0269966					0	0	0	0	0	0
10233	PPP1R3F	HGNC:14944	ENSG00000049769		ENSACAG00000021937	ENSNSUG00000014877	Therian	0	826.84	0	0.311			0.191					0.229123		0.0936051	0.265688		0.312784	0.312784	0.1		0.00892757	0.00960211	0.0156255	0.0270186	0.0104207	0.0107026	0.00857033			0.0765231	0.0273705	0	0	0	0	0	0
10234	USP27X	HGNC:13486	ENSG00000180991		ENSACAG00000011328	ENSNSUG00000004587	Therian	0	826.84	0	0.386			0.181143	2	1	2	1	0.0416017		0.122209					0.2		0.0109581	0.0217847	0.0331873	0.0586208	0.0278294	0.025683	0.0136568					0	0	0	0	0	0
10235	CLCN5	HGNC:2023	ENSG00000171365	ENSGALG00000007234	ENSACAG00000006210	ENSNSUG00000014339	Therian	0	826.84	0	0.457			0.324404	2	1	2	1	0.0409767	0.0270944	0.0440231	0.134116	0.265491	0.460277	0.460277	2.4	22.8491	0.0173764	0.0125916	0.0717441	0.0926156	0.0248109	0.00758564	0.0197729	0.0473813	0.074647	0.178798	0.110092	0	0	0	0	0	0
10236	TRAIL-LIKE	CGNC:49243		ENSGALG00000007240		ENSNSUG00000014340	Therian	0	826.84	0										0.136563							28.3279								0.0112652	0.06156			0	0	0	0	0	0
10237	AKAP4	HGNC:374	ENSG00000147081		ENSACAG00000026985	ENSNSUG00000012157	Therian	0	826.84	0	0.101			0.0523333					0.240537		0.208525	0.0625409						0.996091	0.000195735	0.0426637	0.0717213	0.0392095	0.0214915	0.046636					0	0	0	0	0	0
10238	CCNB3	HGNC:18709	ENSG00000147082		ENSACAG00000024464	ENSNSUG00000014341	Therian	0	826.84	0	0.139								0.66692			0.0625		0.337456		1.4	160.278	0.356423	0.00892418	0.00921184	0.00682588	0.00595821	0.00798277	0.011395			0.740837		0	0	0	0	0	0
10239	DGKK	HGNC:32395	ENSG00000204466	ENSGALG00000003841	ENSACAG00000016513	ENSNSUG00000009625	Therian	0	826.84	0	0.2								0.280308	0.0577762	0.0307507		0.122926				0.152742	0.0253471	0.000959619		0.000418268				0.00280853	0.00150867			0	0	0	0	0	0
10240	SHROOM4	HGNC:29215	ENSG00000158352		ENSACAG00000006061	ENSNSUG00000014343	Therian	0	826.84	0	0.132			0.0921129					0.291448	0.0145838	0.00613328			0.750633	0.750633		12.3351	0.00380809	0.0168166	0.0106815	0.0475358	0.0300216	0.0102751	0.0144798			0.333052	0.143146	0	0	0	0	0	0
10241	BMP15	HGNC:1068	ENSG00000130385	ENSGALG00000004742	ENSACAG00000006053	ENSNSUG00000014344	Therian	0	826.84	0	0.325								0.452088	0.131095	0.0923924		0.343738	0.677053	0.677053	12.5	0.277589	1								0.937884	0.149212	0.223543	0	0	0	0	1	0
10242	NUDT10	HGNC:17621	ENSG00000122824			ENSNSUG00000013597	Therian	0	826.84	0	0.112			0.176538					0.0169285			0.084831				0.4		0.164322	0.101694	0.135683	0.145155	0.0267854	0.0205403	0.0170854					0	0	0	0	0	0
10243	EZHIP	HGNC:33738	ENSG00000187690			ENSNSUG00000012642	Therian	0	826.84	0				0.0236667												22.9		0.505959	0.0258309	0.0592039	0.0141854	0.0214072	0.0141296	0.010493					0	0	0	0	0	0
10244	NUDT11	HGNC:18011	ENSG00000196368			ENSNSUG00000017764	Therian	0	826.84	0	0.26			0.120333					0.0148511							1		0.14392	0.0451301	0.0329947	0.033232	0.0201605	0.0152818	0.0113644					0	0	0	0	0	0
10245	GSPT2	HGNC:4622	ENSG00000189369	ENSGALG00000002910		ENSNSUG00000004691	Therian	0	826.84	0	0.442			0.276571	5	1	4	1	0.159799			0.0625	0.684871			1.6	99.0629	0.0648868	0.0224355	0.040669	0.0471338	0.0305093	0.0281795	0.0116085					0	0	0	0	0	0
10246	MAGED1	HGNC:6813	ENSG00000179222			ENSNSUG00000015902	Therian	0	826.84	0	0.309								0.19055			0.2537				10.4		0.0273535	0.0298627	0.0334977	0.0136997	0.0254719	0.0145528	0.0136861					0	0	0	0	0	0
10247	SSX7	HGNC:19653					Therian	0	826.84	0	0.046								0.612646									0.00870978	0.0209979	0.0241912	0.0282845	0.0246621	0.023365	0.0415707					0	0	0	0	0	0
10248	SSX2	HGNC:11336					Therian	0	826.84	0	0.047								0.742855									0.978938	0.00050536	0.0124693	0.0121173	0.0204915	0.0123505	0.0263345					0	0	0	0	0	0
10249	SSX2B	HGNC:22263					Therian	0	826.84	0	0.075								0.742855									0.687342	0.00603572	0.0125314	0.00414105	0.0134491	0.0111383	0.0173106					0	0	0	0	0	0
10250	FAM156B	HGNC:31962					Therian	0	826.84	0									0.352262									0.0206114	0.0200573	0.0169616	0.022185	0.0186294	0.0140038	0.0134096					0	0	0	0	0	0
10251	GPR173	HGNC:18186	ENSG00000184194		ENSACAG00000021048	ENSNSUG00000014876	Therian	0	826.84	0	0.148			0.143					0.0101502		0.0227158			0.318181	0.318181			0.00602275	0.0178579	0.0573033	0.0154933	0.0242502	0.0132901	0.0113647			0.107743	0.0130425	0	0	0	0	0	0
10252	TSPYL2	HGNC:24358	ENSG00000184205			ENSNSUG00000019031	Therian	641.94	826.84	0.776378	0.114			0.54475					0.257023			0.319768				7.3		0.0377143	0.0384238	0.0724357	0.111772	0.0254024	0.0315966	0.0139779				0.11079	1	0	0	1	0	1
10253	KDM5C	HGNC:11114	ENSG00000126012			ENSNSUG00000012795	Therian	686.84	826.84	0.830681				0.244833					0.0625982			0.373321		0.642664	0.642664	3.9		0.0173859	0.0295136	0.02685	0.02932	0.0279018	0.0270064	0.0317201			0.389006	0.12388	1	0	0	1	0	1
10254	IQSEC2	HGNC:29059	ENSG00000124313		ENSACAG00000009566	ENSNSUG00000014614	Therian	0	826.84	0	0.65			0.183562			1		0.0150593		0.115903	0.385724		0.310086	0.310086			0.0265034	0.0152551	0.0132934	0.0103113	0.018544	0.0151756	0.0153017			0.0710943	0.120251	0	0	0	1	0	0
10255	SMC1A	HGNC:11111	ENSG00000072501		ENSACAG00000009404	ENSNSUG00000014836	Therian	0	826.84	0	0.965			0.126077					0.00157729			0.344003		0.773386	0.773386	15.1		0.0170194	0.0274435	0.0286246	0.0371568	0.0343917	0.0365602	0.0302476			0.268983	0.093658	0	0	0	1	0	0
10256	RIBC1	HGNC:26537	ENSG00000158423		ENSACAG00000009358	ENSNSUG00000014841	Therian	0	826.84	0	0.076								0.336291			0.0711647				2.2		0.505848	0.0140962	0.0303266	0.0037023	0.0180283	0.0114854	0.0109641				0.223599	0	0	0	0	0	0
10257	HSD17B10	HGNC:4800	ENSG00000072506	ENSGALG00000018747	ENSACAG00000009337	ENSNSUG00000019229	Therian	0	826.84	0	0.375								0.155199		0.110459	0.36007	0.261486	0.584299		170.1		0.00887478	0.0244849	0.0309599	0.0172737	0.0234235	0.0238465	0.0270801			0.058671		0	0	0	0	0	0
10258	HUWE1	HGNC:30892	ENSG00000086758		ENSACAG00000004234	ENSNSUG00000018906	Therian	164	826.84	0.198346	0.816			0.099			1		0.0361367		0.0336934	0.296319		0.759416	0.759416	31		0.0289316	0.0258654	0.032276	0.0277738	0.0298285	0.0315974	0.0270173			0.238682	0.287796	1	1	0	0	0	0
10259	PHF8	HGNC:20672	ENSG00000172943		ENSACAG00000011904	ENSNSUG00000019749	Therian	0	826.84	0	0.434			0.101515					0.0724258		0.119058	0.20192		0.618187	0.618187	20		0.142689	0.0299129	0.0389015	0.0368695	0.0289595	0.0271338	0.0282708			0.232995	0.0972349	0	1	0	0	0	0
10260	FAM120C	HGNC:16949	ENSG00000184083		ENSACAG00000012139	ENSNSUG00000019748	Therian	0	826.84	0	0.461			0.0203846			2	1	0.136574		0.127859	0.0625		0.392151	0.392151	3.4		0.020445	0.021193	0.0336071	0.0340384	0.0289333	0.0197897	0.0239837			0.217543	0.0884215	0	0	0	0	0	0
10261	WNK3	HGNC:14543	ENSG00000196632		ENSACAG00000024083	ENSNSUG00000019747	Therian	0	826.84	0	0.274			0.302889			2	1	0.324249			0.0625		0.461029	0.461029	5.5		0.171798	0.0229576	0.0681896	0.0406035	0.017135	0.011289	0.0144037			0.00344258	0.0201372	0	0	0	0	0	0
10262	TSR2	HGNC:25455	ENSG00000158526		ENSACAG00000012270	ENSNSUG00000019746	Therian	0	826.84	0	0.099			0.0608333					0.15274		0.393132	0.403755		0.515335		92.8		0.00945992	0.0223722	0.0172878	0.0253011	0.0170819	0.0222364	0.01662			0.127835		0	0	0	0	0	0
10263	FGD1	HGNC:3663	ENSG00000102302		ENSACAG00000012290	ENSNSUG00000019745	Therian	0	826.84	0	0.266			0.277333					0.0810544		0.122879	0.0625		0.545966	0.545966	6.7		0.0178888	0.0322136	0.0408591	0.0406572	0.0419791	0.0311966	0.0292822			0.14659	0.0859087	0	0	0	0	0	0
10264	GNL3L	HGNC:25553	ENSG00000130119		ENSACAG00000012525	ENSNSUG00000019744	Therian	0	826.84	0	0.108			0.0103939					0.143776		0.100704	0.43294		0.50365	0.50365	9.1		0.00986253	0.0258725	0.025083	0.0298344	0.0306052	0.024447	0.0337239			0.236357	0.12721	0	0	0	0	0	0
10265	ITIH6	HGNC:28907	ENSG00000102313		ENSACAG00000011814	ENSNSUG00000019750	Therian	0	826.84	0	0.068										0.253828			0.255864	0.255864												0.0129719	0.00680355	0	0	0	0	0	0
10266	MAGED2	HGNC:16353	ENSG00000102316			ENSNSUG00000019750	Therian	0	826.84	0	0.444			0.042					0.242592			0.423641				7.4		0.0153277	0.0433815	0.0493168	0.0287833	0.0297824	0.0220875	0.0182417					0	0	0	0	0	0
10267	TRO	HGNC:12326	ENSG00000067445			ENSNSUG00000020232	Therian	0	826.84	0	0.35			0.076					0.371603							3.9		0.00740727	0.0157813	0.0552929	0.020587	0.0264661	0.00853918	0.0120243					0	0	0	0	0	0
10268	PFKFB1	HGNC:8872	ENSG00000158571	ENSGALG00000022191	ENSACAG00000011246	ENSNSUG00000012081	Therian	0	826.84	0	0.375			0.036					0.0882834	0.0542606	0.078683		0.160877	0.265958	0.265958			0.00411894	0.00324144	0.00116721	0.000889649	0.00108456	0.00102338	0.00341909			0.0200561	0.00653352	0	0	0	1	0	0
10269	APEX2	HGNC:17889	ENSG00000169188		ENSACAG00000011201	ENSNSUG00000019753	Therian	0	826.84	0	0.067			0.0164706					0.315686		0.164234	0.484572		0.520042	0.520042	65.7		0.0154049	0.0250427	0.0308667	0.017616	0.0275531	0.0185085	0.042817			0.248838	0.415404	0	0	0	0	0	0
10270	ALAS2	HGNC:397	ENSG00000158578		ENSACAG00000011090	ENSNSUG00000019765	Therian	0	826.84	0	0.82								0.123418		0.0926417	0.0917194		0.36893	0.36893			0.0138503	0.0145052	0.0111376	0.00522021	0.00927507	0.00696002	0.00870434			0.677636	0.162816	0	0	0	0	0	0
10271	MAGEH1	HGNC:24092	ENSG00000187601			ENSNSUG00000010243	Therian	0	826.84	0	0.179			0.0042					0.0664047							3.9		0.0301279	0.0332753	0.0306898	0.0339503	0.0356784	0.0166736	0.0125791					0	0	0	0	0	0
10272	USP51	HGNC:23086	ENSG00000247746			ENSNSUG00000002031	Therian	0	826.84	0	0.095			0.0642105					0.246694									0.0424564	0.0238282	0.0557848	0.0418107	0.0292189	0.0208108	0.013121					0	0	0	0	0	0
10273	FOXR2	HGNC:30469	ENSG00000189299			ENSNSUG00000006759	Therian	0	826.84	0				0.0364375					0.59332									1											0	0	0	0	0	0
10274	RRAGB	HGNC:19901	ENSG00000083750	ENSGALG00000007574	ENSACAG00000006339	ENSNSUG00000007231	Therian	0	826.84	0	0.166			0.0984					0.0302521		0.00502327	0.357911	0.451639			9.1	75.7781	0.016687	0.033183	0.0340107	0.0586355	0.0285637	0.0255988	0.0174041					0	0	0	0	0	0
10275	KLF8	HGNC:6351	ENSG00000102349	ENSGALG00000007570	ENSACAG00000006389	ENSNSUG00000014335	Therian	0	826.84	0	0.109			0.140837	1	1	2	1	0.216787	0.082854	0.0823236	0.0625	0.219437	0.424318	0.424318	8	3.7289	0.0131066	0.0172435	0.0335855	0.0381436	0.0401766	0.0206548	0.0712248	0.64909	0.00734054	0.225455	0.218536	0	0	0	0	0	0
10276	UBQLN2	HGNC:12509	ENSG00000188021	ENSGALG00000012585		ENSNSUG00000016201	Therian	0	826.84	0	0.336			0.11475	1		1		0.121178	0.255505		0.0625	0.52568			16.7	27.6577	0.00539724	0.023187	0.0275928	0.0341109	0.0265055	0.025228	0.0164562	0.0221199	0.0729675			0	0	0	0	0	0
10277	SPIN3	HGNC:27272	ENSG00000204271		ENSACAG00000016513	ENSNSUG00000013936	Therian	0	826.84	0	0.162			0.0893462	1	1					0.0307507	0.401239				1.9		0.00921613	0.0289899	0.0532646	0.0332375	0.036524	0.0223148	0.0294541					0	0	0	0	0	0
10278	SPIN2B	HGNC:33147	ENSG00000186787		ENSACAG00000016513	ENSNSUG00000013936	Therian	0	826.84	0	0.221								0.273237		0.0307507	0.401785				1.4		0.0103271	0.024943	0.0210851	0.0249546	0.0240947	0.0277906	0.0167765					0	0	0	0	0	0
10279	SPIN2A	HGNC:20694	ENSG00000147059		ENSACAG00000016513	ENSNSUG00000013936	Therian	0	826.84	0	0.241			0.0276667					0.28252		0.0307507							0.00830842	0.025402	0.0287902	0.0128821	0.0229809	0.0161098	0.0225699					0	0	0	0	0	0
10280	FAAH2	HGNC:26440	ENSG00000165591		ENSACAG00000000425	ENSNSUG00000019281	Therian	0	826.84	0	0.14			0.0004						0.0646263		0.284972		0.655982	0.655982		26.3836	0.00218247	0.0426866	0.00269418	0.000570138	0.00158584	0.00204845	0.0348335			0.140415	0.0172101	1	0	0	0	0	0
10281	ZXDB	HGNC:13199	ENSG00000198455		ENSACAG00000013807	ENSNSUG00000001726	Therian	0	826.84	0	0.056			0.0692778					0.110828		0.235286							0.00871761	0.0256685	0.0364097	0.0720865	0.0331946	0.0283347	0.0146741					0	0	0	0	0	0
10282	ZXDA	HGNC:13198	ENSG00000198205	ENSGALG00000006277	ENSACAG00000013807	ENSNSUG00000010024	Therian	0	826.84	0	0.172			0.0416889					0.126131		0.235286		0.111111				10.9217	0.0100821	0.029202	0.0418826	0.0611141	0.0355576	0.0256014	0.0152897				0.0630781	0	0	0	0	0	0
10283	ARHGEF9	HGNC:14561	ENSG00000131089	ENSGALG00000007608		ENSNSUG00000007865	Therian	0	966.84	0	0.209			0.014125	6	1	4	1	0.017834	0.0154927		0.288602	0.172505	0.290384	0.290384	0.6	10.787	0.00294535	0.0145889	0.0157552	0.020324	0.0151166	0.0174061	0.00772289	0.0290804	0.00289124	0.0991137	0.0243808	0	0	0	0	0	0
10284	AMER1	HGNC:26837	ENSG00000184675	ENSGALG00000007599	ENSACAG00000003002	ENSNSUG00000007954	Therian	0	966.84	0									0.290513	0.126814			0.46114	0.396128	0.396128		15.447								0.438583	0.113238	0.182714	0.0474673	0	0	0	0	0	0
10285	ASB12	HGNC:19763	ENSG00000198881	ENSGALG00000007594	ENSACAG00000003014	ENSNSUG00000007957	Therian	0	966.84	0	0.151								0.123746	0.0656536	0.0282146	0.0925966	0.167028			0.3	0.680442	0.048956	0.0118878	0.018461	0.000135296	0.00979397	0.00976441	0.00819005	0.0171839	0.00946708			0	0	0	0	0	0
10286	MTMR8	HGNC:16825	ENSG00000102043	ENSGALG00000007590	ENSACAG00000002990	ENSNSUG00000007958	Therian	0	966.84	0	0.12									0.0619141	0.118849		0.283896	0.760818	0.760818	0.9	13.5998	0.0162845	0.0347375	0.0405483	0.0042218	0.0265695	0.0255995	0.0392554	0.0574771	0.0611937	0.207587	0.0559533	0	0	0	0	0	0
10287	ZC4H2	HGNC:24931	ENSG00000126970	ENSGALG00000004716	ENSACAG00000013639	ENSNSUG00000014117	Therian	0	966.84	0				0.11687	1	1	2	1				0.190873	0.437496	0.33348	0.33348	4.1	10.3299	0.00521007	0.0324471	0.0351898	0.0360136	0.0339069	0.0455985	0.0139405			0.135092	0.062689	0	0	0	0	0	0
10288	ZC3H12B	HGNC:17407	ENSG00000102053	ENSGALG00000004715	ENSACAG00000013582	ENSNSUG00000014117	Therian	0	966.84	0	0.293			0.183361	9	1	9	1	0.144556	0.0815851	0.0803748	0.179642	0.286732	0.367285	0.367285	0.6	2.96225	0.00831286	0.0277005	0.0338047	0.0475084	0.0325818	0.0255527	0.0122277			0.132354	0.206071	0	0	0	0	0	0
10289	LAS1L	HGNC:25726	ENSG00000001497	ENSGALG00000004713	ENSACAG00000013567	ENSNSUG00000002677	Therian	0	966.84	0	0.091			0.0443077			1		0.33472	0.119073	0.175283	0.501842	0.627407	0.813185	0.813185	105.1	56.2549	0.0358676	0.0303678	0.0333407	0.0473678	0.0271803	0.0283305	0.0258459			0.287909	0.161173	0	0	0	0	0	0
10290	MSN	HGNC:7373	ENSG00000147065	ENSGALG00000004709	ENSACAG00000003659	ENSNSUG00000014385	Therian	0	966.84	0	0.852			0.187043	3	1	2	1	0.0127199	0.0217158	0.0191292	0.210788	0.225122	0.600248	0.600248	7.1	91.2986	0.00359331	0.0314559	0.0212334	0.0478796	0.044601	0.0252354	0.0228369			0.416495	0.114548	0	0	0	1	0	0
10291	LOC103099650	NCBI:103099650		ENSGALG00000004692		ENSNSUG00000002953	Therian	0	966.84	0													0.129523				0.686153												0	0	0	0	0	0
10292	TAGAP	HGNC:15669		ENSGALG00000004688		ENSNSUG00000018708	Therian	0	966.84	0	0.568	0.492222	0.854724	0.204929	1	1	1	1	0.329388	0.466095			0.18422			0.2	0.0566768	0.0108369	0.012098	0.0124305	0.118413	0.0328861	0.00610364	0.0174505					0	0	0	0	0	0
10293	VSIG4	HGNC:17032	ENSG00000155659	ENSGALG00000004677	ENSACAG00000003594	ENSNSUG00000018706	Therian	0	966.84	0	0.226			0.0065					0.532569		0.269377	0.2732	0.114968				0.101146	0.00643176	0.0055578	0.0145588	0.0074767	0.01266	0.0251305	0.0129033					0	0	0	1	0	0
10294	Hsf3	MGI:3045337		ENSGALG00000004644		ENSNSUG00000014470	Therian	0	966.84	0										0.276215			0.538269				23.5324												0	0	0	0	0	0
10295	HEPH	HGNC:4866	ENSG00000089472	ENSGALG00000004638	ENSACAG00000003376	ENSNSUG00000008295	Therian	0	966.84	0	0.18			0.0102941					0.158981	0.185238	0.110951	0.211129	0.356741	0.538999	0.538999	0.9	17.689	0.00330383	0.0253608	0.0226517	0.0572482	0.0392083	0.0566889	0.00784521			0.136951	0.0413329	0	0	0	1	0	0
10296	Gpr165	MGI:1923456		ENSGALG00000004619		ENSNSUG00000008334	Therian	0	966.84	0																	0.311471												0	0	0	0	0	0
10297	EDA2R	HGNC:17756	ENSG00000131080	ENSGALG00000004599	ENSACAG00000013812	ENSNSUG00000005210	Therian	0	966.84	0	0.02			0.0559565					0.261059	0.144612	0.059652		0.244096			1	6.76504	0.0086399	0.0408848	0.0584222	0.0308292	0.0451984	0.0158503	0.0252351					0	0	0	0	0	0
10298	AR	HGNC:644	ENSG00000169083	ENSGALG00000004596	ENSACAG00000009496	ENSNSUG00000017168	Therian	0	966.84	0	0.99			0.0541837	6	1	7	1	0.145243	0.0497483		0.0625	0.278985	0.359842	0.359842		0.556722	0.0306759	0.120357	0.0606664	0.071927	0.0660063	0.0136863	0.0699369			0.694749	0.290626	0	0	0	1	1	0
10299	OPHN1	HGNC:8148	ENSG00000079482	ENSGALG00000004589	ENSACAG00000009628	ENSNSUG00000017156	Therian	0	966.84	0	0.126			0.0580426					0.0847179	0.0568199	0.07228	0.0951031	0.337688	0.606495	0.606495		8.83946	0.014598	0.0308518	0.0179577	0.0317816	0.0203437	0.0138207	0.0183757			0.204442	0.0746023	0	1	0	1	0	0
10300	YIPF6	HGNC:28304	ENSG00000181704	ENSGALG00000004584		ENSNSUG00000007868	Therian	0	966.84	0	0.128			0.215208					0.0773249	0.0385016		0.55834	0.596576	0.667679	0.667679	9.3	28.389	0.0116531	0.0350475	0.0192674	0.0303341	0.0260853	0.0271524	0.020068			0.207468	0.197186	0	0	0	0	0	0
10301	STARD8	HGNC:19161	ENSG00000130052	ENSGALG00000004575	ENSACAG00000007843	ENSNSUG00000008064	Therian	0	966.84	0	0.191			0.104857	1	1			0.133707	0.0808327	0.0833254	0.257227	0.260444				2.80057	0.00270525	0.0431714	0.0155677	0.087116	0.0290644	0.0135916	0.0126669				0.0392265	0	0	0	1	0	0
10302	EFNB1	HGNC:3226	ENSG00000090776	ENSGALG00000004537	ENSACAG00000009027	ENSNSUG00000017144	Therian	0	966.84	0	0.217			0.179667					0.0457703	0.105393	0.00209564	0.340733	0.330591	0.378997	0.378997	1.2	105.514	0.00981082	0.0257609	0.0220026	0.0155058	0.026009	0.0130559	0.0363658			0.659636	0.195564	0	0	0	0	0	0
10303	FAM155B	HGNC:30701	ENSG00000130054	ENSGALG00000020329		ENSNSUG00000007857	Therian	0	966.84	0	0.223			0.173107	4	1	3		0.122286	0.193735			0.426207	0.298192	0.298192	1	4.35135	0.013612	0.00516631	0.0015746	0.00212614	0.00131328	0.00144939	0.000640071			0.0114846	0.0404224	0	0	0	0	0	0
10304	EDA	HGNC:3157	ENSG00000158813	ENSGALG00000004481		ENSNSUG00000009533	Therian	0	966.84	0	0.303			0.0002	5	1			0.106681	0.0182011			0.523483	0.303535	0.303535	9.3	28.6345	0.0156422	0.0219967	0.0460628	0.0690494	0.0200889	0.0178637	0.018003			0.072377	0.124348	0	0	0	0	0	0
10305	AWAT2	HGNC:23251	ENSG00000147160	ENSGALG00000004367		ENSNSUG00000019865	Therian	0	966.84	0				0.0672143					0.232616	0.0594259			0.113928				0.77874	0.220848							0.00287433	0.000307921			0	0	0	0	0	0
10306	IGBP1	HGNC:5461	ENSG00000089289	ENSGALG00000020330	ENSACAG00000009094	ENSNSUG00000011698	Therian	0	966.84	0	0.119			0.0706667					0.338084		0.00285637	0.446695	0.451746			55.9	55.8026	0.0138864	0.0212488	0.0430187	0.0444022	0.0218777	0.0294102	0.0229032				0.524601	0	0	0	0	0	0
10307	DGAT2L6	HGNC:23250	ENSG00000184210	ENSGALG00000004367		ENSNSUG00000011792	Therian	0	966.84	0	0.188			0.0403					0.373347	0.0594259			0.113928				0.77874	0.0269672	0.0291884	0.0286709	0.0358454	0.0242414	0.0257911	0.0365022	0.00287433	0.000307921			0	0	0	0	0	0
10308	AWAT1	HGNC:23252	ENSG00000204195	ENSGALG00000004367		ENSNSUG00000008457	Therian	0	966.84	0				0.0366667					0.261753	0.0594259			0.113928				0.77874	0.0444924	0.0355235	0.0439817	0.0592813	0.0373835	0.0387749	0.0770589	0.00287433	0.000307921			0	0	0	0	0	0
10309	P2RY4	HGNC:8542	ENSG00000186912	ENSGALG00000004346		ENSNSUG00000001783	Therian	0	966.84	0	0.082			0.049					0.213717	0.0328349			0.160656				4.42504	0.0066804	0.0208945	0.0128521	0.0156001	0.0148431	0.0133731	0.0373471	0.00639735	0.000945648			0	0	0	0	0	0
10310	ARR3	HGNC:710	ENSG00000120500	ENSGALG00000004251	ENSACAG00000009189	ENSNSUG00000007859	Therian	0	966.84	0	0.658								0.228492	0.0664452	0.00216672		0.165485	0.340994		1.4	0.246578	0.00964826	0.0140231	0.0157973	0.0072113	0.0177502	0.0151584	0.0247593	0.0298334	0.0208909	0.037938		0	0	0	0	0	0
10311	RAB41	HGNC:18293	ENSG00000147127	ENSGALG00000004218		ENSNSUG00000004021	Therian	0	966.84	0	0.049			0.0323333								0.110395	0.152798			1.4		0.0882832	0.0112956	0.0141083	0.0249105	0.0134324	0.0153719	0.00768593					0	0	0	0	0	0
10312	PDZD11	HGNC:28034	ENSG00000120509	ENSGALG00000004198	ENSACAG00000004430	ENSNSUG00000001333	Therian	0	966.84	0	0.081			0.0434					0.0420984	0.0488707		0.50319	0.208628	0.524755	0.524755	60.7	45.092	0.00751767	0.025295	0.0175796	0.0143777	0.0205789	0.0175207	0.0247956	0.016122	0.101802	0.209207	0.0604421	0	0	0	0	0	0
10313	KIF4B	HGNC:6322	ENSG00000090889	ENSGALG00000004195	ENSACAG00000001512	ENSNSUG00000001335	Therian	0	966.84	0		0.0874441	0.160188	0.0039					0.188253	0.108788	0.108889		0.131351			3.6	114.484	0.972785				0.0169055			0.835554	0.780045			0	0	0	0	0	0
10314	GDPD2	HGNC:25974	ENSG00000130055	ENSGALG00000005842	ENSACAG00000015258	ENSNSUG00000012215	Therian	0	966.84	0	0.186			0.0234					0.271634	0.193182	0.0164792		0.15624	0.351984	0.351984	10.6	1.97341	0.00099427	0.00114831	0.00137456	0.00143838	0.00110906	0.00103881	0.00189234	0.00650722	0.19187	0.710259	0.16972	0	0	0	0	0	0
10315	DLG3	HGNC:2902	ENSG00000082458	ENSGALG00000005817	ENSACAG00000014844	ENSNSUG00000018454	Therian	0	966.84	0	0.999			0.100719	5	1	6	1	0.0102357	0.069354	0.0329286	0.257875	0.280515	0.385338	0.385338	8	12.3969	0.00348248	0.0198613	0.0209223	0.0192783	0.0172493	0.0181672	0.0252422			0.151186	0.145321	0	0	0	0	0	0
10316	TEX11	HGNC:11733	ENSG00000120498	ENSGALG00000005775	ENSACAG00000015021	ENSNSUG00000004300	Therian	0	966.84	0	0.104								0.864733	0.281292		0.0661173	0.136468	0.498134		12.8	2.45827	0.450293	0.000974175	0.00201118	0.00146646	0.0017411	0.00175171	0.00159466	0.033499	0.00986229	0.240386		0	0	0	0	0	0
10317	SLC7A3	HGNC:11061	ENSG00000165349	ENSGALG00000005727	ENSACAG00000004018	ENSNSUG00000017380	Therian	0	966.84	0	0.365			0.061					0.274446	0.174794	0.0926509			0.361552	0.361552	20.3	75.6222	0.0774422	0.109893	0.0291653	0.112439	0.270657	0.00379486	0.0339926			0.151424	0.0181006	0	0	0	0	0	0
10318	SNX12	HGNC:14976	ENSG00000147164	ENSGALG00000005659	ENSACAG00000015241	ENSNSUG00000012218	Therian	0	966.84	0	0.131			0.275478	3	1	3	1	0.0263158	0.0706052	0.0193086	0.56376	0.537556			11.2	113.85	0.0136063	0.0315966	0.0251993	0.0365858	0.0327282	0.0218915	0.0291309	0.0315822	0.108132		0.0732175	0	0	0	1	0	0
10319	FOXO4	HGNC:7139	ENSG00000184481	ENSGALG00000005658	ENSACAG00000015254	ENSNSUG00000015072	Therian	0	966.84	0	0.857			0.184733					0.176126	0.12599	0.138794	0.256684	0.302866	0.714515		1.1	17.9142	0.0190761	0.0237923	0.0273006	0.0810863	0.0241901	0.0296756	0.014385	0.0160059	0.15181	0.265673		0	0	0	1	1	0
10320	CXorf65	HGNC:33713	ENSG00000204165			ENSNSUG00000012223	Therian	0	966.84	0				0.048					0.463731			0.0654401				18.5		0.696215	0.00457977	0.00288906	0.1491	0.00731536	0.00596923	0.0152165					0	0	0	0	0	0
10321	IL2RG	HGNC:6010	ENSG00000147168	ENSGALG00000005638	ENSACAG00000015455	ENSNSUG00000012224	Therian	0	966.84	0	0.144								0.441965	0.176269		0.117021	0.2048			2.5	6.78469	0.00192461	0.00901245	0.00336618	0.0245889	0.00539546	0.00529469	0.0224585	0.00752078	0.00636476			0	0	0	0	0	0
10322	MED12	HGNC:11957	ENSG00000184634	ENSGALG00000005624	ENSACAG00000015260	ENSNSUG00000018636	Therian	0	966.84	0	0.414			0.107			1	1	0.0382485	0.0720379	0.0336163	0.338204	0.302379	0.695847	0.695847	8.4	19.7651	0.0207692	0.0322525	0.0467034	0.0420506	0.0357038	0.0272044	0.0257662			0.20428	0.137122	0	0	0	1	0	0
10323	NLGN3	HGNC:14289	ENSG00000196338	ENSGALG00000005553	ENSACAG00000015196	ENSNSUG00000013132	Therian	0	966.84	0	0.442			0.142125					0.0147978	0.0124316	0.0237602	0.162225	0.176092	0.262616	0.262616		12.2595	0.015679	0.0187898	0.0195735	0.0313271	0.0120502	0.00683406	0.00520906	0.0290285	0.00133785	0.0386663	0.0339295	0	0	0	0	0	0
10324	GJB1	HGNC:4283	ENSG00000169562	ENSGALG00000005541	ENSACAG00000015186	ENSNSUG00000013155	Therian	0	966.84	0	0.784			0.181667					0.0134929	0.0160084		0.0967341		0.252991	0.252991		55.3981	0.0178344	0.00354915	0.00012275		9.31468e-05	9.69716e-05	0.000136743	0.0120049	0.00559985	0.000601445	0.000814572	0	0	0	0	1	0
10325	ZMYM3	HGNC:13054	ENSG00000147130	ENSGALG00000005533	ENSACAG00000015100	ENSNSUG00000013162	Therian	0	966.84	0	0.563			0.0025	2	1			0.0787546	0.113666	0.0862049	0.138841		0.652112	0.652112	5	6.28302	0.0284148	0.0280219	0.067791	0.0591604	0.0353818	0.0255087	0.0209807	0.066464	0.0630777	0.212958	0.145969	0	0	0	1	0	0
10326	NONO	HGNC:7871	ENSG00000147140	ENSGALG00000005507	ENSACAG00000015026	ENSNSUG00000014170	Therian	0	966.84	0	0.842			0.052	6	1			0.0174685	0.0570713		0.0890494	0.46029	0.840023	0.840023	120.5	447.114	0.0166489	0.0316379	0.0476467	0.0399495	0.0325735	0.0278863	0.0266586	0.0869345	0.137191	0.297611	0.320321	0	0	0	0	0	0
10327	ITGB1BP2	HGNC:6154	ENSG00000147166	ENSGALG00000005493	ENSACAG00000014967	ENSNSUG00000014171	Therian	0	966.84	0	0.131			0.2145					0.188389	0.228529		0.0625	0.111111			4.9	0.176193	0.00398304	0.0312094	0.0087601	0.0321498	0.0900417	0.0211682	0.00604974	0.0199774	0.00502645			0	0	0	0	0	0
10328	RHOG	HGNC:672		ENSGALG00000005475		ENSNSUG00000004119	Therian	0	966.84	0	0.495	-0.509094	-0.259352	0.175833						0.012931			0.199515			45	39.3821	0.0088452	0.0237727	0.0205774	0.0349908	0.0261974	0.0225511	0.0323561	0.0244483	0.0658915			0	0	0	0	0	0
10329	TAF1	HGNC:11535	ENSG00000147133	ENSGALG00000005464	ENSACAG00000014806	ENSNSUG00000014187	Therian	0	966.84	0	0.692			0.0694762			1	1	0.0566186	0.0471	0.0293862	0.417224	0.278331	0.700759	0.700759	3.4	42.3763	0.0176922	0.024277	0.0373499	0.0541219	0.0349784	0.0303711	0.0237111	0.0480421	0.0959692	0.172592	0.115406	0	0	0	0	0	0
10330	OGT	HGNC:8127	ENSG00000147162	ENSGALG00000005425	ENSACAG00000014687	ENSNSUG00000014317	Therian	0	966.84	0	0.313			0.325364	7	1	3	1	0.00487937	0.012987		0.378274	0.58407	0.935741	0.935741	27.4	89.2246	0.00688147	0.0247062	0.0351185	0.0292397	0.0266209	0.0207282	0.0245862	0.0103781	0.0127371	0.242331	0.0844533	0	0	0	0	0	0
10331	GCNA	HGNC:15805	ENSG00000147174	ENSGALG00000020322	ENSACAG00000007172	ENSNSUG00000012224	Therian	0	966.84	0	0.031			0.0192						0.0738839		0.149383		0.760495	0.760495	2.2	40.4032	0.273126	0.00843144	0.0196038	0.0210339	0.0171545	0.0153569	0.0140795	0.166339	0.243554	0.328733	0.399907	0	0	0	0	0	0
10332	CXCR3	HGNC:4540	ENSG00000186810		ENSACAG00000024271	ENSNSUG00000015089	Therian	0	966.84	0	0.063			0.045					0.0916076		0.0473744	0.0860823						0.00980832	0.0211257	0.00298209	0.0176804	0.00783033	0.00543766	0.0376383				0.143938	0	0	0	0	0	0
10333	CXorf49	HGNC:30891	ENSG00000215115			ENSNSUG00000016276	Therian	0	966.84	0									0.640182									0.712033		0.0145662	0.0244807			0.00418714					0	0	0	0	0	0
10334	NHSL2	HGNC:33737	ENSG00000204131		ENSACAG00000023962	ENSNSUG00000000861	Therian	0	966.84	0	0.152			0.121152					0.252021					0.266279	0.266279	0.3		0.0208999	0.0420646	0.0135016	0.102196	0.0312374	0.0342781	0.00933515			0.0438269	0.0230797	0	0	0	0	0	0
10335	PIN4	HGNC:8992	ENSG00000102309	ENSGALG00000003878	ENSACAG00000008618	ENSNSUG00000002112	Therian	0	966.84	0	0.205			0.0568			1	1	0.0690838	0.0586887	0.0493583	0.469819	0.398381	0.509842	0.509842	99.1	140.954	0.0109224	0.027307	0.024845	0.0215925	0.0223105	0.0246875	0.0198594	0.0170188	0.0282428	0.131194	0.806216	0	0	0	0	0	0
10336	ERCC6L	HGNC:20794	ENSG00000186871	ENSGALG00000003881	ENSACAG00000001226	ENSNSUG00000020618	Therian	0	966.84	0	0.269			0.008175					0.338666	0.142243	0.184297					15.2	20.7803	0.0956448	0.0359416	0.0347892	0.0288065	0.0172015	0.0167699	0.0657428	0.325283	0.356242			1	0	0	0	0	0
10337	RPS4X	HGNC:10424	ENSG00000198034	ENSGALG00000004831	ENSACAG00000014601	ENSNSUG00000018233	Therian	342.94	966.84	0.354702	0.904									0.0161204		0.358245	0.562726	0.579068	0.579068	1142.4	1641.77	0.00701343	0.0331252	0.0665227	0.0716509	0.0281809	0.0270783	0.0298954	0.0302537	0.0188537	0.222527	0.469448	0	0	0	1	0	0
10338	CITED1	HGNC:1986	ENSG00000125931			ENSNSUG00000015115	Therian	0	966.84	0	0.353				NA				0.316082			0.0625				0.4		0.360917	0.0108377	0.00132076	0.000649005	0.00160689	0.00117585	0.000820914					0	0	0	0	0	0
10339	HDAC8	HGNC:13315	ENSG00000147099	ENSGALG00000004825	ENSACAG00000014647	ENSNSUG00000018232	Therian	0	966.84	0	0.147			0.0129286					0.0537257	0.0852042	0.0656	0.316492		0.735324	0.735324	62.5	84.5103	0.00982726	0.0277722	0.0252206	0.0215185	0.0225723	0.0217496	0.0239609	0.0568866	0.0597969	0.289302	0.855774	0	0	0	0	0	0
10340	PHKA1	HGNC:8925	ENSG00000067177	ENSGALG00000004801	ENSACAG00000006479	ENSNSUG00000014345	Therian	0	966.84	0				0.02424					0.085014	0.149781		0.10719	0.235649	0.427416	0.427416	2.7	19.6072	0.00910709	0.0255543	0.0324871	0.0505606	0.0105805	0.0168202	0.0145303	0.0144643	0.00459481	0.154479	0.243156	0	0	0	0	0	0
10341	PABPC1L2A	HGNC:27989	ENSG00000186288			ENSNSUG00000014215	Therian	0	966.84	0	0.135			0.218214														0.0498179	0.0367092	0.00198403	0.000874164	0.00147498	0.00181807	0.00129018					0	0	0	0	0	0
10342	VEGFRKDRL	NCBI:422316		ENSGALG00000007646		ENSNSUG00000003922	Therian	0	966.84	0										0.0634483			0.228272				2.83065								0.0222737	0.00549304			0	0	0	0	0	0
10343	CDX4	HGNC:1808	ENSG00000131264	ENSGALG00000007657	ENSACAG00000026013	ENSNSUG00000018007	Therian	0	966.84	0	0.1			0.099					0.164005	0.184697			0.16989				1.46688	0.154687											0	0	0	0	0	0
10344	CHIC1	HGNC:1934	ENSG00000204116	ENSGALG00000007660	ENSACAG00000001087	ENSNSUG00000005319	Therian	0	966.84	0	0.302			0.3212	15	1	8	1	0.0612798	0.0285714	0.0746712	0.40574	0.136657	0.404042	0.404042		7.41874	0.00556972	0.0226748	0.0241916	0.0380276	0.0235841	0.0289616	0.0110131			0.159781	0.137039	0	0	0	0	0	0
10345	BMP2KL	HGNC:17080	ENSG00000204113			ENSNSUG00000001361	Therian	0	966.84	0	0.133																												0	0	0	0	0	0
10346	SLC16A2	HGNC:10923	ENSG00000147100	ENSGALG00000007748	ENSACAG00000002721	ENSNSUG00000017978	Therian	0	966.84	0	0.125			0.207306					0.0652945	0.0683017	0.0671717	0.0625	0.325796	0.35228	0.35228	0.6	5.66715	0.00360164	0.0258403	0.0424828	0.0496874	0.0297546	0.0165678	0.0118881	0.00527667	0.00394715	0.0912563	0.0304645	0	0	0	1	0	0
10347	RLIM	HGNC:13429	ENSG00000131263	ENSGALG00000007750	ENSACAG00000002725	ENSNSUG00000018007	Therian	0	966.84	0				0.259623	18	1	6	1	0.103068	0.0539114	0.115249	0.0625	0.455071	0.803704	0.803704	11.4	110.004	0.0156317	0.0241315	0.0244034	0.0452095	0.0207037	0.0191497	0.0188526	0.0566145	0.231122	0.232193	0.122297	0	0	0	0	0	0
10348	NEXMIF	HGNC:29433	ENSG00000050030	ENSGALG00000007755	ENSACAG00000002731	ENSNSUG00000018008	Therian	0	966.84	0	0.456			0.306932	21	1	14	1	0.20295	0.134587	0.0917317			0.253536	0.253536		3.90902	0.00657479	0.0399448	0.0119956	0.0419205	0.0195621	0.0371023	0.00634373	0.0920989	0.00878782	0.00407029	0.0419209	0	0	0	0	0	0
10349	ABCB7	HGNC:48	ENSG00000131269	ENSGALG00000007788	ENSACAG00000001179	ENSNSUG00000018009	Therian	0	966.84	0	0.364			0.2			2	1	0.152476	0.0621265	0.150179	0.53942	0.577029	0.675377	0.675377	12.4	21.5273	0.0112478	0.0234362	0.025754	0.0355209	0.022939	0.0375618	0.0242102	0.0226925	0.0840595	0.370164	0.0829319	0	0	0	1	0	0
10350	UPRT	HGNC:28334	ENSG00000094841	ENSGALG00000007793	ENSACAG00000001338	ENSNSUG00000018010	Therian	0	966.84	0	0.094			0.0270455					0.246392	0.0793667	0.156283	0.467578	0.439821	0.430682	0.430682	1.6	49.3029	0.00558373	0.0264237	0.0198847	0.0225391	0.0194329	0.0195861	0.0208575	0.0151915	0.0396075	0.0624107	0.11777	0	0	0	1	0	0
10351	ZDHHC15	HGNC:20342	ENSG00000102383	ENSGALG00000007800	ENSACAG00000001382	ENSNSUG00000003001	Therian	0	966.84	0	0.195			0.0167778			1	1	0.0401969	0.0583683			0.479127	0.432365	0.432365		1.14462	0.0115176	0.0182765	0.0420308	0.0354819	0.0311369	0.0213897	0.0141605	0.0336806	0.0476489	0.135806	0.0672585	0	0	0	1	0	0
10352	MAGEE1	HGNC:24934	ENSG00000198934			ENSNSUG00000007595	Therian	0	966.84	0	0.129			0.1025					0.405391									0.00228936	0.0135153	0.0180644	0.0201588	0.0179015	0.00993197	0.00802851					0	1	0	0	0	0
10353	FGF16	HGNC:3672	ENSG00000196468	ENSGALG00000007806	ENSACAG00000008841	ENSNSUG00000020453	Therian	0	966.84	0	0.88			0.2382	8	1			0.00897053	0.00863878			0.259267	0.520509	0.520509		0.213915	0.0214534			0.0312904	0.00894589	0.0263687		0.102107	0.467439	0.480299	0.700114	0	0	0	0	0	0
10354	ATRX	HGNC:886	ENSG00000085224	ENSGALG00000007843	ENSACAG00000008641	ENSNSUG00000020454	Therian	241	966.84	0.249266				0.170852	21	1	14	1	0.166218	0.114281	0.0943936	0.410859	0.47405	0.737666	0.737666	6.1	42.299	0.00870993	0.0277429	0.0323966	0.0516227	0.0304368	0.0289506	0.0208995	0.158314	0.0253169	0.203753	0.0636493	0	1	0	0	1	0
10355	MAGT1	HGNC:28880	ENSG00000102158	ENSGALG00000007861	ENSACAG00000008572	ENSNSUG00000020471	Therian	0	966.84	0	0.104			0.125871					0.211572	0.0290306	0.0202179	0.450036	0.315885	0.491478	0.491478	17.2	72.7709	0.0126967	0.0292129	0.0271019	0.021443	0.025511	0.0124104	0.0268717	0.0631375	0.212651	0.290403	0.10715	0	0	0	0	0	0
10356	COX7B	HGNC:2291	ENSG00000131174	ENSGALG00000007863		ENSNSUG00000020623	Therian	0	966.84	0	0.068			0.0335556					0.524838	0.263042		0.298195	0.332082	0.720101	0.720101	961.8	404.025	0.00456972	0.0200136	0.010436	0.0105243	0.0138717	0.0231947	0.0218214	0.00717766	0.00795016	0.29792	0.425946	0	0	0	1	0	0
10357	ATP7A	HGNC:869	ENSG00000165240	ENSGALG00000007902	ENSACAG00000008542	ENSNSUG00000020473	Therian	0	966.84	0	0.188			0.163528					0.131451	0.113555	0.117706	0.229347	0.381353	0.47983	0.47983	1.4	7.69853	0.0100234	0.0299716	0.025233	0.0464722	0.0265439	0.025507	0.033202	0.0137986	0.0909276	0.3704	0.104684	0	0	0	0	0	0
10358	PGK1	HGNC:8896	ENSG00000102144	ENSGALG00000007936	ENSACAG00000003255	ENSNSUG00000020475	Therian	0	966.84	0	0.761			0.0817879					0.0348275	0.0438199		0.291436	0.371911	0.650085	0.650085	101.6	807.749	0.0062433	0.0220081	0.013951	0.0130567	0.0168488	0.0167116	0.033558	0.00879783	0.0191599	0.0962862	0.36327	0	0	0	0	0	0
10359	TAF9B	HGNC:17306	ENSG00000187325	ENSGALG00000004187		ENSNSUG00000013107	Therian	0	966.84	0	0.631			0.198542					0.206163	0.00260853		0.0625	0.381026			7.2	70.701	0.0181891	0.0291595	0.019998	0.0661177	0.0341132	0.0303316	0.0155919	0.0670422	0.133501			0	0	0	1	0	0
10360	Fndc3c1	MGI:2685630		ENSGALG00000004169		ENSNSUG00000020610	Therian	0	966.84	0										0.143874			0.302048				19.0304								0.0332034	0.0907599			0	0	0	0	0	0
10361	CYSLTR1	HGNC:17451	ENSG00000173198	ENSGALG00000004128		ENSNSUG00000009980	Therian	0	966.84	0	0.13			0.0591579					0.158162	0.0201454			0.304162	0.296046	0.296046		1.56446	0.00179306	0.0153785	0.00186386	0.0249662	0.0181786	0.01197	0.00865877	0.00414264	0.017569	0.844463	0.188557	0	0	0	0	0	0
10362	Gm5127	MGI:3648285		ENSGALG00000004127		ENSNSUG00000014759	Therian	0	966.84	0										0.155753			0.162226				6.7242									0.40654			0	0	0	0	0	0
10363	LPAR4	HGNC:4478	ENSG00000147145	ENSGALG00000004121	ENSACAG00000000902	ENSNSUG00000020612	Therian	0	966.84	0	0.644			0.1264					0.0173797	0.00657348	0.0466423		0.287757	0.378877	0.378877		21.7472	0.0176337	0.0165579	0.122211	0.131515	0.0242314	0.0169308	0.0121455		0.0468804	0.180039	0.0373347	0	0	0	0	0	0
10364	P2RY10	HGNC:19906	ENSG00000078589	ENSGALG00000020331	ENSACAG00000027131	ENSNSUG00000020613	Therian	0	966.84	0	0.271			0.0237			1	1	0.150558	0.0448378	0.103241		0.162708	0.469644	0.469644		0.0213768	0.00225132	0.022042	0.00658285	0.0191814	0.00959705	0.00725444	0.0247631	0.00137454	0.00309966	0.144565	0.012183	0	0	0	0	0	0
10365	GPR174	HGNC:30245	ENSG00000147138	ENSGALG00000004111		ENSNSUG00000014187	Therian	0	966.84	0	0.118			0.169811					0.134365	0.0312595			0.151274					0.00412574	0.0153235	0.0116411	0.0332268	0.0296439	0.00874466	0.0341525	0.00858263	0.00134835			0	0	0	1	0	0
10366	ITM2A	HGNC:6173	ENSG00000078596	ENSGALG00000004107	ENSACAG00000000952	ENSNSUG00000020616	Therian	0	966.84	0	0.221			0.1545					0.0453446	0.0127752	0.0738962	0.360285	0.377598	0.649645	0.649645		229.469	0.00528115	0.0103554	0.0686735	0.196728	0.0190308	0.00640695	0.00948745	0.0116133	0.00825498	0.384825	0.145793	0	0	0	0	0	0
10367	TBX22	HGNC:11600	ENSG00000122145	ENSGALG00000004093	ENSACAG00000001024	ENSNSUG00000020617	Therian	0	966.84	0	0.075			0.02225					0.417757	0.127157	0.116713						0.276142	0.525082	0.00457646	0.00246015	0.00111212	0.00235175	0.00224431		0.177088	0.0165535			0	0	0	0	0	0
10368	CHMP1B	HGNC:24287	ENSG00000215104	ENSGALG00000004086		ENSNSUG00000015543	Therian	0	966.84	0		0.997625	0.913923	0.17413					0.018931	0.0036513			0.516624			69.9	69.7732	0.0119568	0.0215272	0.0177973	0.0366121	0.0185106	0.0222275	0.0231082					0	0	0	0	0	0
10369	TENT5D	HGNC:28399	ENSG00000174016	ENSGALG00000007157	ENSACAG00000011230	ENSNSUG00000020619	Therian	0	966.84	0	0.294			0.0577778	1	1			0.266691	0.045369	0.0743243	0.0625	0.115605	0.25	0.25		0.335965	0.97672		0.13282	0.065316				0.16856	0.00713143		0.0200967	0	0	0	0	0	0
10370	BRWD3	HGNC:17342	ENSG00000165288	ENSGALG00000007151	ENSACAG00000008361	ENSNSUG00000020621	Therian	0	966.84	0	0.66			0.310927	24	1	15	1	0.0624071	0.0369702	0.0684024	0.236196	0.432886	0.503577	0.503577	10.8	4.93909	0.033865	0.0241049	0.0444954	0.130879	0.0266868	0.0244887	0.0308926	0.0715762	0.0741774	0.247081	0.034925	0	1	0	0	0	0
10371	HMGN5	HGNC:8013	ENSG00000198157	ENSGALG00000007131		ENSNSUG00000017677	Therian	0	966.84	0				0.0232105					0.334416	0.046748		0.0999951	0.38463	0.572843	0.572843	3.1	358.985	0.186379	0.0206968	0.0371184	0.046298	0.0238209	0.0206097	0.0186215	0.0932885	0.117004	0.264195	0.117105	0	0	0	0	0	0
10372	SH3BGRL	HGNC:10823	ENSG00000131171	ENSGALG00000007128	ENSACAG00000014696	ENSNSUG00000020623	Therian	0	966.84	0	0.658			0.05					0.0810719	0.061501		0.366616	0.331234	0.688551	0.688551	0.6	46.2364	0.0118036	0.0387276	0.0243577	0.0784378	0.0447363	0.0538727	0.0157095	0.00849412	0.02072	0.363081	0.075865	0	0	0	0	0	0
10373	Gm6377	MGI:3647255	ENSG00000231875	ENSGALG00000007123		ENSNSUG00000005397	Therian	0	966.84	0										0.296278			0.137981				0.563345								0.0936465				0	0	0	0	0	0
10374	LOC422276	CGNC:51683		ENSGALG00000007118		ENSNSUG00000020626	Therian	0	966.84	0										0.052585							0.047756												0	0	0	0	0	0
10375	LOC101750517	CGNC:69967		ENSGALG00000007110		ENSNSUG00000020627	Therian	0	966.84	0										0.112895			0.116489				0.0382666								0.0167672	0.000556141			0	0	0	0	0	0
10376	POU3F4	HGNC:9217	ENSG00000196767		ENSACAG00000014539	ENSNSUG00000020628	Therian	0	966.84	0	0.733								0.0132022		0.00117883									0.000467455			0.012368	0.000372794				0.0264199	0	0	0	0	0	0
10377	CYLC1	HGNC:2582	ENSG00000183035			ENSNSUG00000013438	Therian	0	966.84	0									0.820687			0.0625						1											0	0	0	0	0	0
10378	RPS6KA6	HGNC:10435	ENSG00000072133	ENSGALG00000007097	ENSACAG00000014143	ENSNSUG00000020629	Therian	0	966.84	0	0.164			0.239	9	1	1	1	0.141483	0.00914571	0.104418	0.0625	0.534612	0.654868	0.654868	0.1	7.35749	0.0271867	0.0259735	0.0333904	0.0168755	0.0154939	0.0167533	0.013235	0.0660812	0.0176715	0.189012	0.0120967	0	0	0	0	0	0
10379	HDX	HGNC:26411	ENSG00000165259	ENSGALG00000007041	ENSACAG00000014116	ENSNSUG00000020630	Therian	0	966.84	0	0.351			0.119167			1	1	0.144658	0.0827834	0.0673166		0.242693	0.464681	0.464681		4.52719	0.0247889	0.0325871	0.0361827	0.0507882	0.0341666	0.0232704	0.0140588	0.11114	0.273422	0.153467	0.0721743	0	0	0	0	0	0
10380	LOC101749809	CGNC:69268		ENSGALG00000007028		ENSNSUG00000020631	Therian	0	966.84	0										0.0661108			0.119274				0.0177719								0.0700283	0.0588987			0	0	0	0	0	0
10381	APOOL	HGNC:24009	ENSG00000155008	ENSGALG00000006978	ENSACAG00000014061	ENSNSUG00000009714	Therian	0	966.84	0	0.112			0.0377805			1		0.327496	0.344659		0.213631	0.312419	0.63501	0.63501	3.4	13.1185	0.00967005	0.0202841	0.0160084	0.0226721	0.0209654	0.0211509	0.0184027	0.0171887	0.0449348	0.393694	0.141744	0	0	0	1	0	0
10382	SATL1	HGNC:27992	ENSG00000184788		ENSACAG00000014050	ENSNSUG00000020633	Therian	0	966.84	0	0.051								0.480226		0.154843							0.374962											0	0	0	0	0	0
10383	ZNF711	HGNC:13128	ENSG00000147180	ENSGALG00000006929	ENSACAG00000014034	ENSNSUG00000020635	Therian	0	966.84	0	0.225			0.236389	8	1	10	1	0.0732147	0.0127059	0.0210878	0.0625	0.274665	0.639991	0.639991		11.4548	0.135377	0.00712074	0.0345762	0.0250013	0.0150598	0.0071366	0.0132427	0.00648455	0.0101581	0.296091	0.128586	0	0	0	0	0	0
10384	POF1B	HGNC:13711	ENSG00000124429	ENSGALG00000006919	ENSACAG00000013999	ENSNSUG00000020636	Therian	0	966.84	0	0.117			0.00725					0.135879	0.156066	0.186904	0.16753	0.14223	0.271272	0.271272		9.86321	0.000994669	0.00214156	0.000694968	0.000161211	0.000709944	0.000895867	0.114697	0.138087	0.101743	0.921584	0.0271801	0	0	0	1	0	0
10385	CHM	HGNC:1940	ENSG00000188419	ENSGALG00000006906	ENSACAG00000013859	ENSNSUG00000020637	Therian	0	966.84	0	0.11			0.0583889					0.233067	0.342993	0.156831	0.384571	0.228223	0.561576		10	15.0038	0.0141735	0.0268248	0.0219451	0.0401497	0.0288441	0.0234432	0.0215497	0.0323311	0.0591239	0.200399		0	0	0	1	0	0
10386	DACH2	HGNC:16814	ENSG00000126733	ENSGALG00000006886	ENSACAG00000013802	ENSNSUG00000013903	Therian	0	966.84	0	0.184			0.105	2				0.101137	0.00714413		0.0657568	0.318753	0.275274	0.275274		4.86869	0.0015251	0.00510928	0.00386532	0.00382477	0.003823	0.00159943	0.00062287	0.153767	0.115111	0.0576222	0.620315	0	0	0	1	0	0
10387	KLHL4	HGNC:6355	ENSG00000102271	ENSGALG00000006877	ENSACAG00000011367	ENSNSUG00000003082	Therian	0	966.84	0	0.346			0.0275429					0.151473	0.0203684		0.0625	0.215525	0.283187	0.283187		0.0204265	0.0626276	0.00217047	0.0436236	0.14355	0.0218517	0.00275978	0.000925789	0.0527606	0.013592	0.0682844	0.0162276	0	0	0	0	0	0
10388	PCDH11X	HGNC:8656	ENSG00000102290	ENSGALG00000006851	ENSACAG00000013734	ENSNSUG00000003070	Therian	6.7	973.54	0.0068821	0.093			0.00534783	2				0.198901	0.0192206	0.0325183		0.274325	0.678307	0.678307	0.3	0.161732	0.00433474	0.00438794	0.0900082	0.00470523	0.0050551	0.000949677	0.00272016	0.0129712	0.101046	0.140593	0.0673956	0	0	0	0	0	0
10389	NAP1L3	HGNC:7639	ENSG00000186310			ENSNSUG00000008895	Therian	0	966.84	0	0.252			0.108778	7	1	5	1	0.211569			0.0625				0.7		0.0152148	0.00220126	0.0117452	0.0101971	0.00714557	0.00291918	0.00233663					0	0	0	1	0	0
10390	DIAPH2	HGNC:2877	ENSG00000147202	ENSGALG00000006839	ENSACAG00000013498	ENSNSUG00000016605	Therian	0	966.84	0	0.46			0.192512			1	1	0.135386	0.112412	0.0941239	0.234654	0.300559	0.66077	0.66077	2.5	26.8796	0.0340399	0.0281363	0.0267213	0.0485068	0.0246586	0.0255936	0.0393938			0.151174	0.0496759	0	0	0	0	0	0
10391	PCDH19	HGNC:14270	ENSG00000165194	ENSGALG00000006822		ENSNSUG00000003009	Therian	0	966.84	0	0.309			0.114121	9	1			0.0265502	0.0672527			0.228676	0.261752	0.261752		25.1606	0.0136891	0.00661126	0.0160384	0.0521542	0.0148032	0.00931962	0.0101547	0.0102937	0.0338385	0.0267224	0.0408879	0	0	0	0	0	0
10392	TNMD	HGNC:17757	ENSG00000000005	ENSGALG00000006821		ENSNSUG00000003007	Therian	0	966.84	0	0.423			0.0680625					0.0461087	0.155652		0.0713664	0.123642	0.297225	0.297225		0.118382	0.00391227	0.00519132	0.0250697	0.00867869	0.00483999	0.00501639	0.00275125		0.0850602	0.841112	0.0173332	0	0	0	0	0	0
10393	TSPAN6	HGNC:11858	ENSG00000000003	ENSGALG00000006808		ENSNSUG00000003005	Therian	0	966.84	0	0.063			0.0791818					0.0743294	0.109412		0.222022	0.560586	0.666781	0.666781	27.3	108.938	0.103833	0.020887	0.0834792	0.0436059	0.0298424	0.00963852	0.034323	0.018967	0.141488	0.374935	0.0418305	0	0	0	0	0	0
10394	SRPX2	HGNC:30668	ENSG00000102359	ENSGALG00000006796		ENSNSUG00000003002	Therian	0	966.84	0	0.252			0.0423913					0.0861666	0.0699631		0.227128	0.146577	0.643759	0.643759		0.923369	0.00398913	0.012003	0.0377764	0.0357001	0.0206675	0.0152024	0.0308839	0.0431414	0.135262	0.316607	0.0908049	0	0	0	0	0	0
10395	SYTL4	HGNC:15588	ENSG00000102362	ENSGALG00000006786		ENSNSUG00000003001	Therian	0	966.84	0	0.246			0.0876452	4	1			0.142983	0.060504		0.204912	0.320213	0.438559	0.438559	3.2	7.17736	0.0228973	0.0455025	0.0949088	0.19518	0.0614301	0.0207399	0.0162483	0.00990606	0.0626819	0.107392	0.144008	0	0	0	1	0	0
10396	TRMT12	HGNC:26091		ENSGALG00000006773		ENSNSUG00000002989	Therian	0	966.84	0	0.091	0.349566	-0.14073	0.0154286					0.221703	0.170555			0.302649			14.4	3.36205	0.0376794	0.0320986	0.0261739	0.028323	0.034193	0.0290958	0.0257782	0.0229074	0.0162826			0	0	0	0	0	0
10397	CSTF2	HGNC:2484	ENSG00000101811	ENSGALG00000006760		ENSNSUG00000002961	Therian	0	966.84	0	0.225			0.128688					0.0910596	0.0396809		0.197837	0.758238	0.75669	0.75669	100.8	99.9095	0.041278	0.0207695	0.0218191	0.0181149	0.0295205	0.0193756	0.0477583	0.054399	0.0702467	0.199765	0.301037	0	0	0	1	0	0
10398	NOX1	HGNC:7889	ENSG00000007952	ENSGALG00000006707		ENSNSUG00000002701	Therian	0	966.84	0	0.097			0.0699167					0.270447	0.0655535		0.0625	0.147843	0.301528			0.0973109	0.00651621	0.00389811	0.00490204	0.00814953	0.00843984	0.00631274	0.00642707	0.00471042	0.0012252	0.0145759		0	1	0	0	0	0
10399	XKRX	HGNC:29845	ENSG00000182489	ENSGALG00000006637		ENSNSUG00000002688	Therian	0	966.84	0	0.179			0.0671667	3	1	2	1	0.141626	0.0439183			0.164986	0.469482	0.469482	2.5	0.394474	0.010107	0.0110187	0.00422035	0.00292026	0.00393539	0.00401222	0.0689223	0.00410717	0.00244359	0.323232	0.0698908	0	0	0	1	0	0
10400	ARL13A	HGNC:31709	ENSG00000174225	ENSGALG00000006636	ENSACAG00000007937	ENSNSUG00000005685	Therian	0	966.84	0	0.114			0.0666667					0.474893			0.0625				0.4	0.0219266	0.627488	0.00556845	0.0246113	0.0351968	0.0266933	0.0299255	0.0214927					0	0	0	0	0	0
10401	TRMT2B	HGNC:25748	ENSG00000188917	ENSGALG00000005049		ENSNSUG00000000040	Therian	0	966.84	0				0.0451176					0.377546	0.160914		0.316521	0.510791			1.9	0.392243	0.00933001	0.0254316	0.0275457	0.0317108	0.0209471	0.0233096	0.0285251					0	0	0	0	0	0
10402	TMEM35A	HGNC:25864	ENSG00000126950	ENSGALG00000005041	ENSACAG00000007962	ENSNSUG00000002672	Therian	0	966.84	0	0.518			0.0669524					0.0490398	0.137835		0.127595		0.252888	0.252888		9.5142	0.00367885	0.046069	0.0112416	0.0246365	0.0114262	0.121644	0.00611666	0.0248555	0.00399831	0.00861699	0.0439162	0	0	0	0	0	0
10403	CENPI	HGNC:3968	ENSG00000102384	ENSGALG00000005038	ENSACAG00000007963	ENSNSUG00000002672	Therian	0	966.84	0	0.049			0.0137037					0.391947	0.347575	0.303449		0.152099	0.352583	0.352583	3.8	11.3949	0.0249269	0.0144332	0.0399432	0.0522488	0.0323965	0.0269326	0.0498807	0.388044	0.603105	0.205795	0.147627	0	0	0	1	0	0
10404	DRP2	HGNC:3032	ENSG00000102385	ENSGALG00000005031	ENSACAG00000008061	ENSNSUG00000002286	Therian	0	966.84	0	0.509			0.132231					0.0721766	0.0287259	0.0318994		0.113826	0.258229	0.258229		0.203873	0.00195907	0.00621341	0.00397099	0.0018687	0.00272666	0.0161159	0.00245016	8.60814e-05	0.00127504	0.029072		0	0	0	0	0	0
10405	TAF7L	HGNC:11548	ENSG00000102387			ENSNSUG00000002286	Therian	0	966.84	0	0.039			0.164					0.60119			0.0667004				1.3		0.714492	0.00718036	0.0121255	0.0132936	0.0173287	0.0255053	0.0209004					0	0	0	0	0	0
10406	TIMM8A	HGNC:11817	ENSG00000126953	ENSGALG00000004963	ENSACAG00000008289	ENSNSUG00000002121	Therian	0	966.84	0	0.292			0.0709722					0.0346141	0.208854		0.335845				171.2	78.5453	0.0156053	0.0274543	0.0298913	0.0129447	0.0219854	0.0163373	0.0303103	0.00823977	0.0233926		0.137327	0	0	0	1	0	0
10407	BTK	HGNC:1133	ENSG00000010671	ENSGALG00000004958	ENSACAG00000008298	ENSNSUG00000004261	Therian	0	966.84	0	0.565			0.038					0.0176222	0.168284		0.128592	0.12294	0.444656	0.444656	5.6	3.12934	0.0080499	0.00901683	0.0090482	0.0160169	0.0125713	0.0122144	0.0135877	0.0414086	0.0410131	0.235195	0.0622427	0	0	0	1	0	0
10408	GLA	HGNC:4296	ENSG00000102393	ENSGALG00000004948	ENSACAG00000008537	ENSNSUG00000002114	Therian	0	966.84	0	0.079			0.01395					0.260887	0.0887809	0.104272	0.333345	0.379393	0.786547	0.786547	52.4	4.4164	0.0109043	0.0198339	0.0195149	0.0192041	0.0239081	0.0165551	0.0265168	0.0301929	0.0803403	0.317845	0.32862	0	1	0	0	0	0
10409	RPL36A	HGNC:10359	ENSG00000126945	ENSGALG00000005955		ENSNSUG00000000189	Therian	0	966.84	0	0.259								0.0147961			0.263607	0.624335				815.567	0.00646473	0.0295702	0.0773741	0.0435813	0.0278601	0.0221262	0.0324698					0	0	0	0	0	0
10410	GLRA4	HGNC:31715	ENSG00000188828	ENSGALG00000004936	ENSACAG00000014362	ENSNSUG00000018237	Therian	0	966.84	0	0.425			0.571	2	1	3	1	0.058104	0.0264486	0.060042		0.111111	0.689534	0.689534		1.18384	0.00859936	0.0158081	0.0305229	0.306664	0.0719671	0.00800595	0.00665992	0.0188768	0.0666948	0.285788		0	0	0	0	0	0
10411	TMEM31	HGNC:28601	ENSG00000179363			ENSNSUG00000019605	Therian	0	966.84	0	0.103				NA		NA					0.0629655				2.1		0.852475	0.00376783	0.0527493	0.093849	0.020413	0.00936797	0.010343					0	1	0	0	0	0
10412	PLP1	HGNC:9086	ENSG00000123560	ENSGALG00000000112	ENSACAG00000014323	ENSNSUG00000018238	Therian	0	966.84	0	0.926			0.103133	3	1	5	1		0.00192242		0.0659886	0.121267	0.255603	0.255603	0.2	0.602668	0.0013628	0.000468795	0.000191033	0.0027647	0.000191105	0.00107402	0.000225592	0.0192557	0.000289841	0.015715	0.00030705	0	0	0	0	0	0
10413	RAB9B	HGNC:14090	ENSG00000123570	ENSGALG00000004918	ENSACAG00000014318	ENSNSUG00000018239	Therian	0	966.84	0	0.34			0.216844					0.0262935	0.0144908		0.0625	0.388457	0.325537	0.325537		17.5132	0.00358258	0.0361642	0.0305186	0.122733	0.0280633	0.0343524	0.00333773	0.00546039	0.0374186	0.0993342	0.011176	0	0	0	0	0	0
10414	SLC25A53	HGNC:31894	ENSG00000176274		ENSACAG00000012668	ENSNSUG00000013045	Therian	0	966.84	0	0.23										0.00486643	0.0625																	0	0	0	0	0	0
10415	FAM199X	HGNC:25195	ENSG00000123575	ENSGALG00000008872	ENSACAG00000003239	ENSNSUG00000011701	Therian	0	966.84	0				0.179067	6	1	1	1	0.0310615	0.0112072	0.0431603	0.0625	0.444775	0.727972	0.727972	1.5	16.4336	0.0149384	0.0173711	0.0181347	0.0285479	0.0231081	0.0176222	0.0179363	0.0559816	0.171622	0.270031	0.0508779	0	0	0	0	0	0
10416	ESX1	HGNC:14865	ENSG00000123576			ENSNSUG00000011701	Therian	0	966.84	0	0.154			0.101					0.551878									1											0	0	0	0	0	0
10417	IL1RAPL2	HGNC:5997	ENSG00000189108	ENSGALG00000008888	ENSACAG00000008413	ENSNSUG00000010063	Therian	0	966.84	0	0.243			0.737	1	1	1	1	0.0864759	0.152812			0.200988	0.359034	0.359034		0.39804	0.137538	0.0197548	0.0680113	0.0189937	0.00376818	0.0239695	0.0211446	0.0311257	0.0679458	0.0187252	0.0639032	0	0	0	0	0	0
10418	NRK	HGNC:25391	ENSG00000123572	ENSGALG00000008970		ENSNSUG00000018239	Therian	0	966.84	0	0.258			0.287767					0.39419	0.132673		0.0625	0.21509				1.00887	0.035191	0.0320557	0.385066	0.20579	0.00861881	0.00809247	0.00292479	0.0773808	0.0616343			0	0	0	0	0	0
10419	RADX	HGNC:25486	ENSG00000147231	ENSGALG00000008990	ENSACAG00000026509	ENSNSUG00000010076	Therian	0	966.84	0	0.493			0.0810769					0.232668	0.170554		0.16646	0.404534	0.554425	0.554425	3.4	2.1377	0.0403718	0.00322109	0.0442993	0.0222733	0.0116487	0.00863675	0.0122809	0.0362434	0.0277231	0.450917	0.217321	0	0	0	0	0	0
10420	RNF128	HGNC:21153	ENSG00000133135	ENSGALG00000009000	ENSACAG00000005668	ENSNSUG00000009431	Therian	0	966.84	0	0.527			0.2204	4	1	6	1	0.0928345				0.377188	0.694876	0.694876			0.00188491	0.00155023	0.00350469	0.00038922	0.000181503	0.000364721	0.00752297			0.296317	0.0220256	0	0	0	0	0	0
10421	TBC1D8B	HGNC:24715	ENSG00000133138	ENSGALG00000009040	ENSACAG00000005730	ENSNSUG00000010100	Therian	0	966.84	0	0.189			0.08125					0.11497	0.120742	0.0595137	0.367203	0.455646	0.529715	0.529715		4.91846	0.0389736	0.020487	0.03081	0.0269682	0.0218054	0.0156474	0.0204922	0.023701	0.0494485	0.261031	0.0730747	0	0	0	1	0	0
10422	RIPPLY1	HGNC:25117	ENSG00000147223	ENSGALG00000007309		ENSNSUG00000012985	Therian	0	966.84	0	0.313			0.00828571					0.345856								0.0570797	0.0155168	0.0202617	0.0159728	0.0230814	0.0125992	0.0082028	0.00810781					0	0	0	0	0	0
10423	CLDN2	HGNC:2041	ENSG00000165376	ENSGALG00000007311	ENSACAG00000014144	ENSNSUG00000018292	Therian	0	966.84	0	0.27			0.1184					0.0819363	0.0761259	0.0647513		0.172032	0.322979	0.322979		0.850583	0.000496469	0.000524209	0.000248631	0.00110767	0.000280928	0.000468514	0.000583407	0.0154205	0.0298207	0.050672		0	0	0	0	0	0
10424	MORC4	HGNC:23485	ENSG00000133131			ENSNSUG00000020594	Therian	0	966.84	0	0.13			0.0319524					0.281826			0.226874				2.9		0.0454396	0.0331025	0.0359925	0.0936786	0.0319955	0.0154176	0.0342934					0	0	0	0	0	0
10425	RBM41	HGNC:25617	ENSG00000089682	ENSGALG00000004832	ENSACAG00000014146	ENSNSUG00000018291	Therian	0	966.84	0	0.108			0.0595758					0.206314	0.203951		0.344866	0.296991	0.696177	0.696177	7	7.31344	0.0234715	0.0218652	0.0200345	0.0126005	0.0236135	0.0312217	0.028858	0.00778077	0.0162122	0.231622	0.391967	0	0	0	0	0	0
10426	NUP62CL	HGNC:25960	ENSG00000198088	ENSGALG00000004856		ENSNSUG00000001901	Therian	0	966.84	0	0.056			0.0572683					1.08265	0.196112		0.214027	0.4548			0.3	64.264	0.193532	0.00605184	0.00767226		0.00550031	0.00347109	0.0294737	0.18043	0.176047			0	0	0	0	0	0
10427	DNAAF6	HGNC:28570	ENSG00000080572	ENSGALG00000004870		ENSNSUG00000018244	Therian	0	966.84	0									0.323244	0.257486		0.0796879	0.113867	0.781203	0.781203		11.7179								0.610221	0.547832	0.243781	0.878439	0	0	0	0	0	0
10428	FRMPD3	HGNC:29382	ENSG00000147234	ENSGALG00000004876	ENSACAG00000014211	ENSNSUG00000017894	Therian	0	966.84	0	0.135			0.183167	3	1			0.106504				0.186956	0.393854	0.393854		0.28769	0.0103574	0.0101451	0.0273995	0.0374006	0.0100063	0.00259607	0.00321803			0.325857	0.0245438	0	0	0	0	0	0
10429	PRPS1	HGNC:9462	ENSG00000147224	ENSGALG00000004908		ENSNSUG00000018242	Therian	0	966.84	0				0.0349687					0.00418877			0.593468	0.648378	0.682439		110.9	426.783	0.0166324	0.0253184	0.0264792	0.0222829	0.0256352	0.0214687	0.0187259	0.0330124	0.0692455	0.168072		0	0	0	0	0	0
10430	TSC22D3	HGNC:3051	ENSG00000157514	ENSGALG00000022382	ENSACAG00000026711	ENSNSUG00000018236	Therian	0	966.84	0	0.248			0.248353					0.0665376	0.0128415	0.00167474	0.384984		0.508918	0.508918	3.3	0.860449	0.00417272	0.0459566	0.0452929	0.112129	0.026564	0.0239393	0.0299415			0.241535	0.831773	0	0	0	0	0	0
10431	NCBP2L	HGNC:31795	ENSG00000170935	ENSGALG00000005753	ENSACAG00000015128	ENSNSUG00000012220	Therian	0	966.84	0	0.064									0.0458185	0.0938933		0.231577	0.754486			50.741	0.608535	0.00789518	0.0776811	0.0376216				0.196563	0.178665	0.282085		0	0	0	0	0	0
10432	MID2	HGNC:7096	ENSG00000080561	ENSGALG00000003860	ENSACAG00000001449	ENSNSUG00000000872	Therian	0	966.84	0	0.469			0.163974					0.011632	0.00307134	0.0682334	0.36235	0.222414	0.428854	0.428854		0.494039	0.00514926	0.0397314	0.0164347	0.0693567	0.0362058	0.0343098	0.0411182	0.00536304	0.0224347	0.182378	0.107601	0	0	0	0	0	0
10433	VSIG1	HGNC:28675	ENSG00000101842	ENSGALG00000008290	ENSACAG00000011962	ENSNSUG00000007866	Therian	0	966.84	0	0.313			0.04395					0.259853	0.248456		0.0625						0.219274	0.00102378	0.0024418	0.000936962	0.00198059	0.00140715	0.0016438	0.00978901	0.00013515		0.000709377	0	1	0	0	0	0
10434	PSMD10	HGNC:9555	ENSG00000101843	ENSGALG00000008287	ENSACAG00000012006	ENSNSUG00000020598	Therian	0	966.84	0	0.983			0.0245	2	1	1		0.108434	0.13487	0.0512063	0.451137	0.644439	0.60508	0.60508	83.1	53.3196	0.0271466	0.0225922	0.0229305	0.0249531	0.0274743	0.0194041	0.0249664	0.0690898	0.105962	0.413168	0.179127	0	0	0	0	0	0
10435	ATG4A	HGNC:16489	ENSG00000101844	ENSGALG00000008282	ENSACAG00000012035	ENSNSUG00000020597	Therian	0	966.84	0	0.189			0.125091					0.11929	0.0507141	0.0986859	0.247059	0.500963	0.358876	0.358876	12.4	15.683	0.0116796	0.0208117	0.0122844	0.0217887	0.020993	0.0186702	0.0238904	0.0331881	0.115698	0.0943269	0.0840698	0	0	0	0	0	0
10436	COL4A5	HGNC:2207	ENSG00000188153	ENSGALG00000008141	ENSACAG00000012321	ENSNSUG00000010715	Therian	0	966.84	0	0.88			0.2294	5	1	3	1	0.14715	0.178173		0.383491	0.163978	0.676616	0.676616		55.321	0.00612387	0.0528892	0.0241813	0.158028	0.0863348	0.00356925	0.0222172	0.0352265	0.390353	0.369486	0.0567979	0	0	0	0	0	0
10437	IRS4	HGNC:6128	ENSG00000133124	ENSGALG00000008107	ENSACAG00000012623	ENSNSUG00000020594	Therian	0	966.84	0	0.053			0.129189					0.29026	0.0322414	0.0748884		0.414343				15.3171	0.00314667	0.00425809	0.139746	0.0323011	0.0525607	0.00095232	0.0122236	0.0409846	0.202622		0.200646	0	0	0	0	0	0
10438	GUCY2F	HGNC:4691	ENSG00000101890	ENSGALG00000000808		ENSNSUG00000004542	Therian	0	966.84	0	0.149				NA				0.164062	0.230399							0.789422	0.576038			0.0937058	0.0372438		0.0627126					0	0	0	0	0	0
10439	NXT2	HGNC:18151	ENSG00000101888	ENSGALG00000008092	ENSACAG00000012649	ENSNSUG00000004542	Therian	0	966.84	0	0.003			0.2805					0.451329	0.0988853		0.0625	0.251216	0.639509	0.639509	31.3	72.6665	0.139385	0.021952	0.0231964	0.018435	0.0187786	0.00910639	0.0383728	0.0525558	0.0396137	0.169085	0.231814	0	0	0	0	0	0
10440	KCNE5	HGNC:6241	ENSG00000176076	ENSGALG00000023613	ENSACAG00000012668	ENSNSUG00000006586	Therian	0	966.84	0	0.192			0.0802222					0.111323		0.00486643					1.1												0.326559	0	0	0	0	0	0
10441	ACSL4	HGNC:3571	ENSG00000068366	ENSGALG00000008088	ENSACAG00000012669	ENSNSUG00000020592	Therian	0	966.84	0	0.889			0.2348	8	1	5	1	0.047025	0.0472052		0.147877	0.303228	0.329173	0.329173	16.5	16.1363	0.0326343	0.0202503	0.018064	0.0270379	0.0202433	0.0189388	0.0155836	0.0576475	0.0555947	0.0548786	0.0645778	0	0	0	1	0	0
10442	TMEM164	HGNC:26217	ENSG00000157600	ENSGALG00000008076	ENSACAG00000022568	ENSNSUG00000008074	Therian	0	966.84	0	0.327			0.132762					0.244048	0.0447039		0.186043	0.249895	0.500598	0.500598	3.5	20.9648	0.00464183	0.0151234	0.0379502	0.0134331	0.0129399	0.00980057	0.0186191	0.0191216	0.159793	0.260346	0.0452162	0	0	0	1	0	0
10443	AMMECR1	HGNC:467	ENSG00000101935	ENSGALG00000008074	ENSACAG00000012909	ENSNSUG00000008073	Therian	0	966.84	0	0.851			0.295629	29	1	25	1	0.0864765		0.138133	0.188116	0.222363			1.6	12.2761	0.012222	0.018203	0.054819	0.043303	0.025887	0.0120702	0.0678683	0.0347508	0.0283486		0.0717887	0	0	0	1	0	0
10444	CHRDL1	HGNC:29861	ENSG00000101938	ENSGALG00000008072	ENSACAG00000012945	ENSNSUG00000008071	Therian	0	966.84	0	0.347			0.0752222	4	1	2	1	0.180507	0.206815	0.231943	0.163447	0.209732	0.282105	0.282105		0.904651	0.00286671	0.159396	0.00102044	0.0950709	0.0766468	0.0697836	0.00388223	0.114824	0.542806	0.0579181	0.237163	0	0	0	1	0	0
10445	PAK3	HGNC:8592	ENSG00000077264	ENSGALG00000008058	ENSACAG00000013010	ENSNSUG00000008069	Therian	0	966.84	0	0.42			0.20846	12	1			0.0200419	0.000952925	0.0293112	0.0831697	0.440644	0.276264	0.276264		11.1205	0.00658552	0.0185417	0.00681096	0.00916662	0.00499748	0.00185389	0.00400844	0.0662544	0.0711484	0.0264902	0.0516354	0	0	0	0	0	0
10446	CAPN6	HGNC:1483	ENSG00000077274	ENSGALG00000008006	ENSACAG00000013131	ENSNSUG00000008002	Therian	0	966.84	0	0.537			0.233077					0.0531491	0.212008	0.25228	0.0939234	0.236262				0.421163	0.0256525	0.114198	0.0376117	0.0581225	0.178026	0.0215861	0.023927	0.0407326	0.236684			0	0	0	0	0	0
10447	DCX	HGNC:2714	ENSG00000077279	ENSGALG00000007993	ENSACAG00000013260	ENSNSUG00000007995	Therian	0	966.84	0	0.834			0.224654	19	1	9	1	0.00415945	0.00551724	0.0453605		0.180755	0.26557	0.26557		2.45046	0.00788626	0.00507162	0.00602742	0.00601542	0.00795433	0.00480297	0.00503948	0.301527	0.623241	0.034356	0.0850243	0	0	0	0	0	0
10448	KCTD12	HGNC:14678		ENSGALG00000009628		ENSNSUG00000014334	Therian	0	966.84	0	0.672			0.120229	4	1	4	1	0.0066605	0.0331298			0.321454			0.5	0.789843	0.0201071	0.0121571	0.0461329	0.0386787	0.0551747	0.0248465	0.0155755	0.00694883	0.0136578			0	0	0	0	0	0
10449	ALG13	HGNC:30881	ENSG00000101901	ENSGALG00000007976	ENSACAG00000013362	ENSNSUG00000007993	Therian	0	966.84	0				0.0368235	2	1						0.27331	0.1476	0.635029	0.635029	16.2	3.95282	0.0303466	0.0304018	0.0244321	0.0516085	0.0248677	0.022786	0.0248829	0.210503	0.589848	0.304566	0.153189	0	0	0	0	0	0
10450	TRPC5	HGNC:12337	ENSG00000072315	ENSGALG00000007972	ENSACAG00000013386	ENSNSUG00000007991	Therian	0	966.84	0	0.125			0.0860909					0.0336583	0.0377037	0.0294796		0.234247	0.290558	0.290558		0.284713	0.00824889	0.00381636	0.00421436	0.0108881	0.00418736		0.00571832	0.0377971	0.221286	0.019624		1	1	0	0	0	0
10451	LHFPL1	HGNC:6587	ENSG00000182508			ENSNSUG00000015930	Therian	0	966.84	0	0.372			0.0122222					0.0764052									0.012277	0.0141739	0.00876151	0.00242856	0.0047805	0.00280382	0.00440022					0	0	0	0	0	0
10452	AMOT	HGNC:17810	ENSG00000126016	ENSGALG00000007952	ENSACAG00000008464	ENSNSUG00000020474	Therian	0	966.84	0	0.327			0.188342					0.152098	0.0305539	0.0621258	0.0625	0.500703	0.775562	0.775562	14.4	22.4265	0.0107278	0.0154709	0.0150878	0.0147802	0.0179105	0.0207352	0.0175071	0.0853058	0.142821	0.195403	0.342241	0	0	0	1	0	0
10453	HTR2C	HGNC:5295	ENSG00000147246	ENSGALG00000005853	ENSACAG00000004275	ENSNSUG00000012214	Therian	0	966.84	0	0.303			0.146462	9	1	1		0.0961575	0.0409786			0.118167	0.261494			0.225932	0.000967319	0.000644191					0.00237827	0.0103714	0.0374323	0.0208289		0	0	0	0	0	0
10454	IL13RA2	HGNC:5975	ENSG00000123496	ENSGALG00000020316		ENSNSUG00000016176	Therian	0	966.84	0	0.047								0.43543	0.222325		0.0721172	0.279412			14.7	0.038774	0.325579	0.0304298	0.000922871	0.000682984	0.000902507	0.00192574	0.00113926	0.0109912	0.0129587			0	0	0	0	0	0
10455	LRCH2	HGNC:29292	ENSG00000130224	ENSGALG00000005882	ENSACAG00000004355	ENSNSUG00000012212	Therian	0	966.84	0	0.132			0.214143	13	1	11	1	0.0842246	0.0806299		0.279502	0.353368	0.580101	0.580101		3.64743	0.015581	0.105137	0.0354624	0.0908897	0.0396136	0.0814479	0.0141611	0.0343147	0.0958801	0.354506	0.126274	0	0	0	1	0	0
10456	PLS3	HGNC:9091	ENSG00000102024	ENSGALG00000005930	ENSACAG00000004502	ENSNSUG00000012211	Therian	0	966.84	0	0.968			0.0735714			1	1	0.00833495	0.0214306	0.0172572	0.173536	0.57482	0.541426	0.541426	44.8	281.091	0.00530469	0.0171307	0.0224137	0.0650707	0.0397632	0.0117002	0.0335989	0.0118207	0.110445	0.461744	0.0722843	0	0	0	1	0	0
10457	AGTR2	HGNC:338	ENSG00000180772	ENSGALG00000005936	ENSACAG00000004826	ENSNSUG00000012210	Therian	0	966.84	0	0.555			0.0208182					0.103705	0.111282			0.19406	0.634064	0.634064		0.941248	0.00129339			0.580203	0.0103743	0.00353697			0.332029	0.394282	0.0208668	0	1	0	0	0	0
10458	SLC6A14	HGNC:11047	ENSG00000087916	ENSGALG00000005957	ENSACAG00000012352	ENSNSUG00000015873	Therian	0	966.84	0	0.258			0.044871					0.12957	0.142718		0.072333	0.235923				17.1132	0.00314307	0.00287506	0.00134874	0.00181053	0.00133783	0.000783344	0.210201	0.0244152	0.213049			0	0	0	0	0	0
10459	KLHL13	HGNC:22931	ENSG00000003096	ENSGALG00000005982	ENSACAG00000004895	ENSNSUG00000012208	Therian	0	966.84	0	0.218			0.260545	11	1	7	1	0.108811	0.0264429	0.00916767	0.0625	0.22619	0.478191	0.478191	0.4	18.9933	0.0274491	0.0374246	0.0189021	0.0348605	0.112443	0.0195907	0.0127735	0.00729119	0.31024	0.0715879	0.0914925	0	0	0	0	0	0
10460	WDR44	HGNC:30512	ENSG00000131725	ENSGALG00000005997	ENSACAG00000004931	ENSNSUG00000004655	Therian	0	966.84	0	0.871			0.248167	7	1	4	1	0.114655	0.110723	0.0958418	0.503272	0.540971	0.557	0.557	6.6	58.5024	0.0320597	0.0267711	0.0234785	0.0397602	0.0304433	0.0269743	0.0288373	0.0381923	0.249202	0.204785	0.10983	0	0	0	0	0	0
10461	DOCK11	HGNC:23483	ENSG00000147251	ENSGALG00000006017	ENSACAG00000005007	ENSNSUG00000016261	Therian	0	966.84	0	0.337			0.0728182	4	1			0.0431852	0.0610893	0.0757678	0.190204	0.23076	0.676096	0.676096		10.9608	0.00538615	0.0115963	0.00630467	0.0821351	0.0312287	0.0442438	0.014786	0.00600226	0.0170976	0.170496	0.17283	0	0	0	0	0	0
10462	IL13RA1	HGNC:5974	ENSG00000131724	ENSGALG00000006032		ENSNSUG00000017185	Therian	0	966.84	0	0.386			0.0817097					0.339034	0.343586		0.37111	0.170084			1.1	10.0227	0.0110738	0.0180317	0.0306561	0.0341663	0.0212494	0.0274934	0.0251755					0	0	0	0	0	0
10463	LONRF3	HGNC:21152	ENSG00000175556	ENSGALG00000008860	ENSACAG00000003194	ENSNSUG00000011699	Therian	0	966.84	0	0.438			0.346279	9	1			0.237568	0.0248428		0.189256	0.381079	0.505259	0.505259		2.39971	0.0117936	0.0211396	0.0178648	0.0358161	0.00841582	0.0380057	0.00557856	0.00960111	0.0139252	0.494795	0.0593716	0	0	0	0	0	0
10464	PGRMC1	HGNC:16090	ENSG00000101856	ENSGALG00000020260	ENSACAG00000012881	ENSNSUG00000011698	Therian	0	966.84	0	0.189			0.127					0.0490244	0.132241		0.346638	0.33344	0.539352	0.539352	27.3	86.2625	0.00749891	0.0387587	0.0214392	0.0260886	0.0248994	0.0199758	0.0167036	0.0187832	0.00850877	0.463519	0.0360781	0	0	0	1	0	0
10465	AKAP17BP	HGNC:38514	ENSG00000214992			ENSNSUG00000015914	Therian	0	966.84	0																													0	0	0	0	0	0
10466	SLC25A43	HGNC:30557	ENSG00000077713	ENSGALG00000008682	ENSACAG00000012863	ENSNSUG00000011696	Therian	0	966.84	0	0.062			0.01255					0.184329	0.447666		0.0625		0.438376	0.438376	7.9	2.34618	0.00522588	0.0205067	0.0221732	0.0341226	0.0211337	0.0150014	0.05141	0.0442065	0.109792	0.570287	0.136475	0	0	0	1	0	0
10467	SLC25A5	HGNC:10991	ENSG00000005022	ENSGALG00000008675	ENSACAG00000012800	ENSNSUG00000007250	Therian	0	966.84	0	0.306			0.0362857	2	1			0.0265748	0.0310442		0.385831	0.56761	0.468219	0.468219	458.7	283.8	0.00747912	0.0161382	0.0135202	0.0111951	0.015408	0.0285083	0.0389384	0.0235036	0.0214219	0.0970765	0.241367	0	0	0	1	0	0
10468	CXorf56	HGNC:26239	ENSG00000018610	ENSGALG00000008652		ENSNSUG00000011692	Therian	0	966.84	0	0.125			0.0350769					0.00496689	0.00697776		0.529763	0.430856	0.822125	0.822125	32.4	48.7079	0.0225161	0.0254178	0.0289271	0.044983	0.0271142	0.0271925	0.0230852	0.0400505	0.113628	0.18887	0.656797	0	0	0	0	0	0
10469	UBE2A	HGNC:12472	ENSG00000077721	ENSGALG00000008648	ENSACAG00000027391	ENSNSUG00000011691	Therian	0	966.84	0	0.872			0.1713	5	1	5	1				0.307897	0.26877	0.769581	0.769581	24.9	71.5385	0.0162518	0.0238327	0.0150758	0.0281844	0.0241533	0.0262336	0.031468	0.0518917	0.0160051	0.213912	0.0564455	0	0	0	1	0	0
10470	NKRF	HGNC:19374	ENSG00000186416	ENSGALG00000008645	ENSACAG00000012140	ENSNSUG00000011690	Therian	0	966.84	0	0.401			0.0665172					0.0698056	0.220769	0.0603857	0.0625	0.111111	0.595842	0.595842	9.5	42.434	0.00888561	0.0183139	0.0227016	0.0199448	0.0176977	0.0157979	0.0224416	0.0850383	0.103755	0.211885	0.0929419	0	0	0	0	0	0
10471	SEPTIN6	HGNC:15848	ENSG00000125354	ENSGALG00000008633	ENSACAG00000011892	ENSNSUG00000010005	Therian	0	966.84	0	0.388			0.0577742					0.0425968	0.00624257	0.00950764	0.290077	0.366355	0.433939	0.433939		147.3	0.0603497	0.0141491	0.0128579	0.03919	0.0129363	0.0772795	0.0110951	0.0279989	0.0298614	0.0995593	0.0737791	0	0	0	1	0	0
10472	SOWAHD	HGNC:32960	ENSG00000187808		ENSACAG00000028976	ENSNSUG00000010004	Therian	0	966.84	0	0.248								0.262079					0.61812	0.61812												0.1601	0.147198	0	0	0	0	0	0
10473	RPL39	HGNC:10350	ENSG00000198918	ENSGALG00000008620	ENSACAG00000003624	ENSNSUG00000010002	Therian	0	966.84	0	0.601									0.0100394		0.28838	0.300684			166.8	1693.43	0.00800294	0.0274117	0.0623765	0.0380053	0.0226249	0.0219154	0.0334282	0.0284837	0.0390946		0.742917	0	0	0	0	0	0
10474	UPF3B	HGNC:20439	ENSG00000125351	ENSGALG00000008618	ENSACAG00000003625	ENSNSUG00000010001	Therian	0	966.84	0	0.211			0.118333	2	1	2	1	0.126077	0.193706	0.0699734	0.499417	0.238319	0.461524	0.461524	23.1	70.0472	0.0223368	0.0237292	0.0247529	0.0171856	0.0223592	0.0261805	0.0221615	0.143777	0.171332	0.137808	0.258102	1	0	0	0	0	0
10475	RNF113A	HGNC:12974	ENSG00000125352	ENSGALG00000000538	ENSACAG00000012485	ENSNSUG00000017504	Therian	0	966.84	0	0.131								0.0611474	0.0445896	0.0808279		0.114837	0.718013	0.718013	121.2	33.3478	0.00674582	0.0231586	0.0273147	0.0323421	0.0242877	0.0220381	0.0209718	0.310177	0.16044	0.250287	0.341097	0	0	0	0	0	0
10476	NDUFA1	HGNC:7683	ENSG00000125356	ENSGALG00000008613	ENSACAG00000003685	ENSNSUG00000009997	Therian	0	966.84	0	0.001								0.115838	0.048785		0.150706	0.644599			1190.3	189.227	0.00696081	0.0195753	0.0144152	0.0107523	0.0137446	0.0212109	0.0171245	0.034349	0.0400384			0	0	0	0	0	0
10477	AKAP14	HGNC:24061	ENSG00000186471	ENSGALG00000020261	ENSACAG00000003688	ENSNSUG00000019324	Therian	0	966.84	0	0.046								0.6331	0.306808		0.0754406	0.113162			4.1	0.494755	0.889508	0.000762655	0.00600263		0.00476813	0.0050242		0.76316	0.0292348			0	0	0	0	0	0
10478	NKAP	HGNC:29873	ENSG00000101882	ENSGALG00000020262		ENSNSUG00000007937	Therian	0	966.84	0	0.35			0.127225	1	1			0.134711	0.0783985		0.399806	0.28223			82.9	25.5593	0.025362	0.0253885	0.0309404	0.0431221	0.025168	0.0253042	0.0196336	0.123248	0.0441484			0	0	0	0	0	0
10479	ZBTB33	HGNC:16682	ENSG00000177485	ENSGALG00000008611	ENSACAG00000003737	ENSNSUG00000009998	Therian	0	966.84	0	0.537			0.12408	8	1	6	1	0.174128	0.234062	0.0846158	0.0625	0.317722	0.567523	0.567523	6.7	5.00673	0.0207651	0.0172469	0.0349387	0.0236548	0.0209236	0.0149062	0.0275868	0.0273745	0.0166028	0.440511	0.0858574	0	0	0	0	0	0
10480	TMEM255A	HGNC:26086	ENSG00000125355	ENSGALG00000008604	ENSACAG00000003743	ENSNSUG00000009997	Therian	0	966.84	0	0.372								0.0677966	0.0779626	0.0569603		0.209715	0.301709	0.301709		12.7279								0.0259944	0.0119513	0.0560971	0.0424796	0	0	0	0	0	0
10481	ATP1B4	HGNC:808	ENSG00000101892	ENSGALG00000008593	ENSACAG00000003749	ENSNSUG00000009996	Therian	0	966.84	0	0.149			0.122882					0.176694	0.068147	0.181566		0.111111	0.52025	0.52025		1.0057	0.0198732	0.0155124	0.0165207	0.0158146	0.0165136	0.0108479	0.0124705	0.0241668	0.00235114	0.238704	0.0313716	0	0	0	0	0	0
10482	LAMP2	HGNC:6501	ENSG00000005893	ENSGALG00000008572		ENSNSUG00000009995	Therian	0	966.84	0	0.433			0.0906					0.570809	0.358576		0.499347	0.540635	0.272507		13.6	24.8301	0.00893215	0.0271913	0.0183138	0.0170523	0.0173836	0.0117116	0.0280368	0.00549839	0.00518292	0.917407		0	0	0	0	0	0
10483	CUL4B	HGNC:2555	ENSG00000158290	ENSGALG00000008559	ENSACAG00000010679	ENSNSUG00000009994	Therian	369	966.84	0.381656	0.811			0.124579	6	1	1		0.0541667	0.0310164	0.0548404	0.309794	0.219631	0.711563	0.711563	10	56.0475	0.0445041	0.029778	0.03415	0.0403954	0.0266581	0.0271966	0.028339	0.114977	0.0560709	0.248645	0.0767681	0	1	0	0	0	0
10484	MCTS1	HGNC:23357	ENSG00000232119	ENSGALG00000008517	ENSACAG00000010791	ENSNSUG00000009993	Therian	0	966.84	0	0.551			0.0761579					0.0646447	0.0333995	0.0117869	0.355315	0.182509	0.546362		13.6	52.0828	0.0140298	0.0207804	0.0148364	0.012406	0.0171341	0.0161699	0.0268704	0.0222164	0.0834796	0.22063		0	0	0	0	0	0
10485	C1GALT1C1	HGNC:24338	ENSG00000171155	ENSGALG00000008513	ENSACAG00000010827	ENSNSUG00000009992	Therian	0	966.84	0	0.208			0.00973333					0.0762032	0.145764	0.0567565	0.31969		0.554573	0.554573	6.8	24.3923	0.0147286	0.0224083	0.0201728	0.00969624	0.0219796	0.0153623	0.0250713	0.0303901	0.0301437	0.147	0.221156	0	0	0	0	0	0
10486	GRIA3	HGNC:4573	ENSG00000125675	ENSGALG00000008512	ENSACAG00000002331	ENSNSUG00000016211	Therian	0	966.84	0	0.329				17	1	16	1	0.0461804	0.126482	0.0374503	0.0808738	0.117603	0.252226	0.252226		0.153229	0.000896626	0.00363744	0.0116794	0.0167125	0.00314489	0.00156549	0.00921251			0.00592624	0.00373029	0	0	0	0	0	0
10487	THOC2	HGNC:19073	ENSG00000125676	ENSGALG00000008507	ENSACAG00000011585	ENSNSUG00000009069	Therian	284.2	1010.04	0.281375	0.413			0.396714	11	1	8	1	0.0366242	0.052381	0.0551289	0.632487	0.414767	0.503814	0.503814	44.6	55.3508	0.0159103	0.0305319	0.036531	0.0507299	0.0334651	0.0338139	0.0282365	0.22803	0.0823426	0.175663	0.0956473	0	0	0	0	0	0
10488	XIAP	HGNC:592	ENSG00000101966	ENSGALG00000008491	ENSACAG00000011578	ENSNSUG00000009062	Therian	0	966.84	0	0.142			0.17002					0.155952	0.290783	0.175989	0.0625	0.482782	0.902483	0.902483	6.9	7.12544	0.0110196	0.0216265	0.0222463	0.0269185	0.0220379	0.0179956	0.0231809	0.015782	0.0904013	0.260612	0.110513	0	0	0	0	0	0
10489	STAG2	HGNC:11355	ENSG00000101972	ENSGALG00000008482	ENSACAG00000011541	ENSNSUG00000003118	Therian	0	966.84	0	0.602			0.49675	22	1	11	1	0.0128075	0.00921844	0.0267686	0.208939	0.406948	0.74593	0.74593	36	52.0558	0.00739328	0.0265294	0.0363081	0.0550004	0.0301123	0.0338401	0.0261148	0.0327522	0.0353515	0.210373	0.0689987	0	1	0	0	0	0
10490	SH2D1A	HGNC:10820	ENSG00000183918	ENSGALG00000008447		ENSNSUG00000012900	Therian	0	966.84	0	0.394			0.0410625					0.129467	0.229953		0.0966242	0.137006				0.272113	0.00385314	0.0131586	0.00826207	0.0809649	0.0193044	0.00929584	0.0210956	0.00456772	0.00732895			0	0	0	0	0	0
10491	TENM1	HGNC:8117	ENSG00000009694	ENSGALG00000008442	ENSACAG00000015165	ENSNSUG00000020607	Therian	0	966.84	0	0.655								0.0381106	0.0376857			0.134739	0.264375	0.264375		0.126519								0.00604573	0.0107523	0.0109698	0.0235596	0	0	0	0	0	0
10492	SMARCA1	HGNC:11097	ENSG00000102038	ENSGALG00000008431	ENSACAG00000011376	ENSNSUG00000020605	Therian	0	966.84	0	0.99			0.172111	4				0.0461133	0.007281	0.0355105	0.273814	0.336771	0.536121	0.536121	0.1	4.39017	0.0746576	0.0301603	0.0585282	0.0604565	0.0264089	0.0254812	0.0134446	0.0093839	0.00889091	0.18166	0.0742719	0	0	0	0	0	0
10493	OCRL	HGNC:8108	ENSG00000122126	ENSGALG00000003920	ENSACAG00000000936	ENSNSUG00000000951	Therian	0	966.84	0	0.289			0.1274					0.0982645	0.150263	0.0654781	0.129612	0.448668	0.664816	0.664816	5.8	15.6818	0.0506076	0.0383703	0.0385044	0.100302	0.0320466	0.0288462	0.0171729	0.0871904	0.0635466	0.234838	0.126733	0	0	0	0	0	0
10494	APLN	HGNC:16665	ENSG00000171388			ENSNSUG00000013886	Therian	0	966.84	0	0.014			0.157905					0.147373									0.00669715	0.0095512	0.00855679	0.0014787	0.00287899	0.0021917	0.00134784					0	0	0	0	0	0
10495	XPNPEP2	HGNC:12823	ENSG00000122121	ENSGALG00000003949	ENSACAG00000009224	ENSNSUG00000011340	Therian	0	966.84	0	0.346			0.0251667					0.220712	0.135476	0.143674	0.188483	0.296193	0.299822	0.299822		0.256127	0.000144981	0.00133071	0.00231707	0.000992907	0.00574271	0.00375826	0.00169657			0.0298692	0.00254907	0	0	0	0	0	0
10496	SASH3	HGNC:15975	ENSG00000122122	ENSGALG00000003951	ENSACAG00000009197	ENSNSUG00000016461	Therian	0	966.84	0	0.301			0.124667					0.0537476		0.147967	0.108326	0.153526	0.615018	0.615018		7.30505	0.00250464	0.0116879	0.011349	0.0199004	0.0119189	0.0125364	0.015768			0.220233	0.052339	0	0	0	0	0	0
10497	ZDHHC9	HGNC:18475	ENSG00000188706	ENSGALG00000003962	ENSACAG00000009139	ENSNSUG00000016071	Therian	0	966.84	0	0.536			0.156741					0.028288		0.171907	0.351694	0.336723	0.876357	0.876357	18.5	46.4084	0.00516824	0.0199771	0.0124936	0.0155892	0.0117551	0.0127196	0.017431			0.285272	0.0834567	0	0	0	0	0	0
10498	UTP14A	HGNC:10665	ENSG00000156697	ENSGALG00000024039	ENSACAG00000009064	ENSNSUG00000001008	Therian	0	966.84	0	0.339			0.012					0.404255	0.136634	0.155007	0.413927	0.434972	0.761934	0.761934	59.5	99.9041	0.0050982	0.0295232	0.0321254	0.0340423	0.0328227	0.0314899	0.0311375	0.0697554	0.0733822	0.270459	0.0559362	0	0	0	0	0	0
10499	BCORL1	HGNC:25657	ENSG00000085185	ENSGALG00000003976	ENSACAG00000009024	ENSNSUG00000008730	Therian	0	966.84	0	0.165			0.306389	10	1	6	1	0.12546			0.16543	0.349674	0.591837	0.591837	3.7	0.876624	0.0713838	0.0341401	0.036814	0.0771834	0.0412788	0.0332107	0.0246654	0.0984836	0.0546176	0.399328	0.105217	1	0	0	0	0	0
10500	ELF4	HGNC:3319	ENSG00000102034			ENSNSUG00000014941	Therian	0	966.84	0	0.43			0.174364					0.267419			0.114923				2.2		0.0168367	0.0197982	0.0493628	0.0438115	0.0467074	0.0218918	0.0384417					0	0	0	1	0	0
10501	AIFM1	HGNC:8768	ENSG00000156709	ENSGALG00000004003	ENSACAG00000008867	ENSNSUG00000001023	Therian	0	966.84	0	0.282			0.0186667	7	1	7	1	0.154888	0.0557604	0.127786	0.340784	0.377374	0.735951	0.735951	43.8	77.4441	0.0314253	0.0164118	0.0114018	0.00647409	0.0133345	0.0201294	0.0128705	0.0229496	0.104748	0.332975	0.0322171	0	0	0	0	0	0
10502	RAB33A	HGNC:9773	ENSG00000134594	ENSGALG00000024049	ENSACAG00000008849	ENSNSUG00000002080	Therian	0	966.84	0	0.095			0.122					0.0196226	0.0432227	0.0304215	0.147739		0.266499			5.84427	0.00288729	0.00171654	0.00617986	0.0229526	0.0100471	0.00229174	0.00246473	0.0138129	0.0451378	0.0246925		0	0	0	0	0	0
10503	SLC25A14	HGNC:10984	ENSG00000102078	ENSGALG00000004063	ENSACAG00000008749	ENSNSUG00000002088	Therian	0	966.84	0	0.507			0.031			1		0.0223538	0.0171429	0.107584	0.329884	0.111111	0.328768	0.328768	24.7	27.8945	0.0360354	0.0165387	0.0199376	0.0196841	0.0195545	0.0177432	0.0184379	0.018259	0.0774655	0.0860695	0.127359	0	0	0	0	0	0
10504	GPR119	HGNC:19060	ENSG00000147262	ENSGALG00000004069	ENSACAG00000008748	ENSNSUG00000002096	Therian	0	966.84	0	0.44			0.005					0.261978	0.215285							0.282351	0.166533								0.00809204			0	0	0	0	0	0
10505	RBMX2	HGNC:24282	ENSG00000134597	ENSGALG00000004025	ENSACAG00000008819	ENSNSUG00000002031	Therian	0	966.84	0	0.055			0.0324583					0.154293		0.128861	0.375166	0.473518	0.352521	0.352521	37.5	44.5105	0.0123245	0.0287735	0.0297408	0.041036	0.0286905	0.0292269	0.0246147			0.105804	0.129833	0	0	0	0	0	0
10506	ENOX2	HGNC:2259	ENSG00000165675	ENSGALG00000004079	ENSACAG00000008657	ENSNSUG00000002097	Therian	0	966.84	0	0.106			0.126115					0.0762979	0.0245999	0.0811923	0.360994	0.332176	0.793263	0.793263	3.5	33.8219	0.0288093	0.0284891	0.0235365	0.0383944	0.0333384	0.0314716	0.0240733	0.0412682	0.0409811	0.209043	0.21557	0	0	0	0	0	0
10507	ARHGAP36	HGNC:26388	ENSG00000147256	ENSGALG00000007160	ENSACAG00000027396	ENSNSUG00000016261	Therian	0	966.84	0				0.154923					0.236084	0.114118			0.144586				0.23102	0.00245955	0.000114991	9.34518e-06	2.60551e-05	9.06877e-06	1.0137e-05	1.03308e-05	0.0612325	0.439132			0	0	0	0	0	0
10508	OR13H1	HGNC:14755	ENSG00000171054			ENSNSUG00000011523	Therian	0	966.84	0	0.102				NA				0.247827																				0	0	0	0	0	0
10509	STK26	HGNC:18174	ENSG00000134602	ENSGALG00000006049	ENSACAG00000009341	ENSNSUG00000017186	Therian	0	966.84	0				0.1389	5	1	3	1	0.0175947	0.00648394	0.0316716	0.189027	0.417626	0.69445	0.69445	1.6	151.358								0.0169001	0.0374236	0.316894	0.0677156	0	0	0	0	0	0
10510	FRMD7	HGNC:8079	ENSG00000165694	ENSGALG00000023843	ENSACAG00000014721	ENSNSUG00000017187	Therian	0	966.84	0	0.128			0.058					0.18607	0.0336412	0.104079						0.396851	0.0339982	0.0328895		0.0344696	0.54497		0.00499098	0.00173849			0.0851463	0	0	0	0	0	0
10511	RAP2C	HGNC:21165	ENSG00000123728	ENSGALG00000006061		ENSNSUG00000017188	Therian	0	966.84	0	0.537			0.430182	32	1	10	1		0.0357143		0.334133	0.352823			3.6	160.685	0.0115841	0.02029	0.0178106	0.0568197	0.225679	0.0164578	0.0218453	0.0263441	0.071027		0.116981	0	0	0	0	0	0
10512	MBNL3	HGNC:20564	ENSG00000076770	ENSGALG00000006066	ENSACAG00000009557	ENSNSUG00000005797	Therian	0	966.84	0	0.15			0.302918	25	1	12	1	0.271164	0.0381356	0.0625887	0.134044	0.431123	0.541421	0.541421	1.6	5.21746	0.219502	0.00704991	0.0186111	0.0407573	0.039313	0.00326884	0.0256635			0.461748	0.054394	0	0	0	0	0	0
10513	HS6ST2	HGNC:19133	ENSG00000171004	ENSGALG00000006071		ENSNSUG00000017250	Therian	0	966.84	0	0.38			0.0528421	4	1			0.170994			0.119743	0.432858				17.722	0.0291474	0.0106805	0.164955	0.0426278	0.0133323	0.0022167	0.00609069				0.174229	0	0	0	0	0	0
10514	GPC4	HGNC:4452	ENSG00000076716	ENSGALG00000006080	ENSACAG00000009010	ENSNSUG00000017251	Therian	0	966.84	0	0.799			0.134324	10	1	2		0.0626625	0.0429203		0.0625	0.46326	0.631102		0.4	243.93	0.0340626	0.0338914	0.0289338	0.117183	0.0271582	0.0600153	0.00764462	0.00894005	0.0248748	0.254969		0	0	0	0	0	0
10515	GPC3	HGNC:4451	ENSG00000147257	ENSGALG00000006087	ENSACAG00000016063	ENSNSUG00000017252	Therian	0	966.84	0	0.712			0.184					0.0811268	0.128525		0.295328	0.127942	0.300741	0.300741	2.5	12.2674	0.00903723	0.00763636	0.0300956	0.0663301	0.00804832	0.00701354	0.00668574	0.0130999	0.427968	0.168721	0.261118	0	0	1	1	0	0
10516	CCDC160	HGNC:37286	ENSG00000203952			ENSNSUG00000016764	Therian	0	966.84	0				0.07					0.35569									0.042685	0.0307356	0.0188177	0.00845578	0.00300166	0.00786916	0.0102008					0	0	0	0	0	0
10517	PHF6	HGNC:18145	ENSG00000156531	ENSGALG00000006094	ENSACAG00000006530	ENSNSUG00000017253	Therian	241	966.84	0.249266	0.69			0.253379	19	1	2	1	0.0362875	0.00497512		0.154343	0.490161	0.957909	0.957909	19	56.1374	0.021706	0.019387	0.0676301	0.0259456	0.0213961	0.01577	0.0241357	0.040797	0.0920292	0.23163	0.191586	0	0	0	0	0	0
10518	HPRT1	HGNC:5157	ENSG00000165704	ENSGALG00000006098	ENSACAG00000006525	ENSNSUG00000000666	Therian	0	966.84	0	0.667			0.1185	2	1			0.0549165	0.0405639	0.0737964	0.34435	0.511892	0.450592	0.450592	109.2	34.0942	0.0784939	0.0143119	0.0166093	0.0147316	0.0130485	0.00967745	0.0138796	0.00690886	0.0421064	0.193175	0.0473477	0	0	0	0	0	0
10519	PABIR2	HGNC:30490	ENSG00000156504	ENSGALG00000006108	ENSACAG00000012826	ENSNSUG00000016545	Therian	241	966.84	0.249266	0.211			0.0523478	3	1			0.210086	0.0413504	0.0533556	0.453275	0.332276	0.747264	0.747264	3.1	52.4895	0.0420453	0.0239311	0.0393914	0.0431491	0.0293706	0.0206056	0.0229887	0.00422739	0.00911991	0.332515	0.151037	0	0	0	0	0	0
10520	PABIR3	HGNC:25202	ENSG00000156500	ENSGALG00000006127		ENSNSUG00000012670	Therian	0	966.84	0	0.056			0.0153333					0.772981	0.0881398		0.108072	0.63949			31.2	65.6944	0.12547	0.0235126	0.0762099	0.137522	0.0231532	0.0219588	0.0168928	0.025535	0.0242351			0	0	0	0	0	0
10521	MOSPD1	HGNC:25235	ENSG00000101928	ENSGALG00000006132	ENSACAG00000012803	ENSNSUG00000016543	Therian	0	966.84	0	0.139			0.200474	4	1	1	1	0.0421538	0.149695	0.0508039	0.367195	0.550185	0.835454		111.2	20.74	0.0435563	0.0313947	0.028911	0.024227	0.035012	0.0218974	0.047589	0.0146681	0.0242282	0.268834		0	0	0	0	0	0
10522	INTS6L	HGNC:27334	ENSG00000165359	ENSGALG00000006157	ENSACAG00000012726	ENSNSUG00000016488	Therian	0	966.84	0	0.397			0.123667	3	1	1	1		0.010568	0.0789303	0.249269	0.412581	0.650542	0.650542	10.4	17.5582	0.0271089	0.0186415	0.0532979	0.0567203	0.0296032	0.018214	0.0227162	0.00918636	0.0132925	0.211498	0.145647	0	0	0	0	0	0
10523	SAGE1	HGNC:30369	ENSG00000181433			ENSNSUG00000006928	Therian	0	966.84	0	0.365			0.000666667					0.396212			0.0625						0.893204	0.00359289		0.0211691								0	0	0	0	0	0
10524	MMGT1	HGNC:28100	ENSG00000169446	ENSGALG00000006162	ENSACAG00000012693	ENSNSUG00000020438	Therian	0	966.84	0				0.148361	4	1	1	1	0.0651607	0.0624569	0.360941	0.0625	0.667905	0.701475	0.701475	31.4	96.446	0.00743435	0.0265419	0.022433	0.0631187	0.0302457	0.0309615	0.0194655			0.206546	0.135184	0	0	0	0	0	0
10525	SLC9A6	HGNC:11079	ENSG00000198689	ENSGALG00000006180	ENSACAG00000012644	ENSNSUG00000016386	Therian	0	966.84	0	0.408			0.193519	1				0.0549419	0.105477	0.04602	0.262027	0.322024	0.396283	0.396283	4.2	17.0123	0.0118288	0.00733366	0.0146846	0.0194399	0.0131397	0.0118637	0.0114805	0.0218252	0.0538564	0.204506	0.0488135	0	0	0	0	0	0
10526	FHL1	HGNC:3702	ENSG00000022267	ENSGALG00000006190	ENSACAG00000009112	ENSNSUG00000016385	Therian	0	966.84	0	0.426			0.0461429					0.131345	0.0471638		0.197968	0.11547	0.476229	0.476229	1.6	0.392929	0.00402295	0.0409766	0.00606247	0.147836	0.0311236	0.0347528	0.00740474	0.000269643	0.0104209	0.419149	0.146031	0	0	0	0	0	0
10527	MAP7D3	HGNC:25742	ENSG00000129680	ENSGALG00000006256	ENSACAG00000009215	ENSNSUG00000019730	Therian	0	966.84	0	0.048			0.098	1	1			0.345006		0.121036	0.240351	0.373616			17.6	13.1878	0.0667325	0.017249	0.0754031	0.106706	0.0339982	0.0272513	0.0146983					0	0	0	0	0	0
10528	ADGRG4	HGNC:18992	ENSG00000156920	ENSGALG00000006393		ENSNSUG00000006851	Therian	0	966.84	0	0.086			0.003					0.392998				0.133667				0.183679								0.0818291				0	0	0	0	0	0
10529	BRS3	HGNC:1113	ENSG00000102239	ENSGALG00000006406	ENSACAG00000009318	ENSNSUG00000016366	Therian	0	966.84	0	0.306			0.0155					0.239687	0.184906			0.111172	0.252078	0.252078		0.0206103	0.251681		0.450931	0.189422	0.0141204					0.00824204		0	0	0	0	0	0
10530	HTATSF1	HGNC:5276	ENSG00000102241	ENSGALG00000006410	ENSACAG00000009346	ENSNSUG00000016365	Therian	0	966.84	0	0.382			0.0796667	1	1			0.194527	0.169193	0.0868545	0.433313	0.602187	0.792174	0.792174	21	23.0279	0.027062	0.0168145	0.0375792	0.0424756	0.0234677	0.0188227	0.0170651	0.0339069	0.0376259	0.19137	0.06557	0	1	0	1	0	0
10531	VGLL1	HGNC:20985	ENSG00000102243	ENSGALG00000006412	ENSACAG00000009400	ENSNSUG00000016364	Therian	0	966.84	0	0.563			0.065					0.785361	0.248175		0.105233	0.165205	0.319131	0.319131		17.6923	0.00992379	0.033627					0.154825	0.904456		0.783378	0.0619922	0	0	0	0	0	0
10532	CD40LG	HGNC:11935	ENSG00000102245	ENSGALG00000006415	ENSACAG00000026177	ENSNSUG00000016364	Therian	0	966.84	0	0.548			0.035					0.279219	0.327266			0.16386				0.0293508	0.0289102	0.0254059	0.0120074	0.122517	0.0164393	0.0170946	0.0483152	0.00946368	0.0203216			0	0	0	0	0	0
10533	ARHGEF6	HGNC:685	ENSG00000129675	ENSGALG00000006439	ENSACAG00000009401	ENSNSUG00000016362	Therian	0	966.84	0	0.277			0.0973	3	1			0.104595	0.105263	0.124553	0.145429	0.293082	0.598419			18.0033	0.00458768	0.0113149	0.0216574	0.0323045	0.0238391	0.0156702	0.00976889	0.00249541	0.0194269	0.203316		0	0	0	0	0	0
10534	RBMX	HGNC:9910	ENSG00000147274	ENSGALG00000006457	ENSACAG00000009551	ENSNSUG00000016360	Therian	911.84	966.84	0.943114	0.234			0.087	5		6	1	0.0184825	0.0111707	0.0274858	0.362973	0.565309	0.671345	0.671345	164.8	212.898	0.0140936	0.0283741	0.0596003	0.0494298	0.0304738	0.026805	0.0248071	0.0604507	0.058943	0.372387	0.367235	0	0	0	0	0	0
10535	Gm364	MGI:2685210	ENSG00000241150	ENSGALG00000006487		ENSNSUG00000010368	Therian	0	966.84	0										0.0941204			0.583455				28.357								0.0132922	0.0376133			0	0	0	0	0	0
10536	GPR101	HGNC:14963	ENSG00000165370			ENSNSUG00000016488	Therian	0	966.84	0	0.233								0.266228																				0	0	0	0	0	0
10537	ZIC3	HGNC:12874	ENSG00000156925	ENSGALG00000006497		ENSNSUG00000016358	Therian	0	966.84	0	0.854			0.30875	14	1			0.0176968	0.0254309			0.171141	0.260245	0.260245		19.4209	0.0266982	0.0048323	0.00417818	0.00159264	0.00266089	0.00239611	0.00302246					0	0	0	0	0	0
10538	FGF13	HGNC:3670	ENSG00000129682	ENSGALG00000006508	ENSACAG00000025835	ENSNSUG00000016383	Therian	0	966.84	0	0.856			0.0632143	9	1	2	1	0.320875			0.156608	0.181467	0.313028		15.2	14.5293	0.00503431	0.0264485	0.00523012	0.00846704	0.00851575	0.0110466	0.00356885	0.00316604	0.0527106	0.0825542		0	0	0	1	0	0
10539	F9	HGNC:3551	ENSG00000101981	ENSGALG00000006513	ENSACAG00000014529	ENSNSUG00000016356	Therian	0	966.84	0	0.284			0.04805					0.201087	0.212552	0.156963	0.0625	0.114923	0.250889	0.250889		0.200266	0.00011214	4.1552e-05	4.8273e-05	4.19887e-05	2.7737e-05	3.04761e-05	4.17585e-05	0.0705323	0.00166834	5.21287e-05		0	0	0	0	0	0
10540	MCF2	HGNC:6940	ENSG00000101977	ENSGALG00000006562	ENSACAG00000014649	ENSNSUG00000016346	Therian	0	966.84	0	0.162			0.1535					0.243557	0.0654589	0.0747842	0.151342	0.293451	0.377812	0.377812		3.3486	0.152311	0.00268999	0.0446313	0.00165204	0.000908269	0.0012409	0.000909631	0.0147762	0.0391248	0.256663	0.00588675	0	0	0	0	0	0
10541	ATP11C	HGNC:13554	ENSG00000101974	ENSGALG00000006623	ENSACAG00000005875	ENSNSUG00000016345	Therian	0	966.84	0	0.416			0.0731613	1				0.0877682	0.0702731	0.162959	0.153014	0.400906	0.648381	0.648381	5.8	70.6305	0.0429322	0.0331556	0.0427019	0.0679988	0.0442052	0.0330746	0.0218372	0.01772	0.0478995	0.197244	0.0457865	1	0	0	1	0	0
10542	SOX3	HGNC:11199	ENSG00000134595	ENSGALG00000007243		ENSNSUG00000006821	Therian	966.84	966.84	1	0.98			0.038625					0.0594815	0.0166603				0.252509	0.252509			0.206605		0.00434776	0.028576	0.00115067					0.00993454		0	0	0	0	0	0
10543	SLITRK4	HGNC:23502	ENSG00000179542	ENSGALG00000007242	ENSACAG00000009466	ENSNSUG00000006482	Therian	0	966.84	0	0.495			0.163541	7	1	4	1	0.031459	0.0789832		0.0625		0.254311	0.254311		1.92599	0.00720913	0.00619205	0.0144902	0.00328751	0.0027811	0.0025453	0.00300772	0.00203821	0.0326878	0.0139001		0	0	0	0	0	0
10544	SLITRK2	HGNC:13449	ENSG00000185985	ENSGALG00000009192		ENSNSUG00000004351	Therian	0	966.84	0									0.0314301	0.0866622			0.395043	0.269001	0.269001		12.3542								0.0114317	0.0473295	0.0284636		0	0	0	0	0	0
10545	FMR1	HGNC:3775	ENSG00000102081	ENSGALG00000009177	ENSACAG00000007899	ENSNSUG00000006500	Therian	0	966.84	0	0.49			0.419654	27	1	22	1	0.12424	0.0609191	0.0572391	0.324328	0.365763	0.897089	0.897089	7.6	46.4597	0.0199227	0.01956	0.0305592	0.044408	0.026196	0.0247515	0.0189947	0.129062	0.149931	0.278679	0.0625588	0	0	0	0	0	0
10546	FMR1NB	HGNC:26372	ENSG00000176988			ENSNSUG00000003096	Therian	0	966.84	0	0.062								0.636617			0.0627364				153	0.438083	0.990918	0.00048132	0.0456613	0.0903413	0.0179462							0	0	0	0	0	0
10547	AFF2	HGNC:3776	ENSG00000155966	ENSGALG00000023501	ENSACAG00000010688	ENSNSUG00000019971	Therian	0	966.84	0	0.299			0.0617667	10	1	2	1	0.156335	0.177396	0.0772592			0.262084	0.262084		3.40163	0.0523194	0.00689626	0.0421204	0.00510928	0.00273436	0.00162424	0.00651593			0.0346846	0.00129168	0	1	0	0	0	0
10548	IDS	HGNC:5389	ENSG00000010404	ENSGALG00000009154	ENSACAG00000010705	ENSNSUG00000010146	Therian	0	966.84	0	0.191			0.0667976					0.140548	0.220513	0.00586364		0.467072	0.903993	0.903993	3.5	1.93918	0.00159824	0.0111613	0.0125633	0.0212166	0.0116618	0.0115066	0.00843589	0.0101543	0.0533502	0.276551	0.121067	0	0	0	0	0	0
10549	EOLA1	HGNC:28089	ENSG00000197620	ENSGALG00000009128	ENSACAG00000008621	ENSNSUG00000010228	Therian	0	966.84	0				0.02915					0.264921	0.230547	0.180005	0.163225	0.297967	0.590371	0.590371	5.7	4.40544	0.010627	0.0264491	0.02014	0.0404453	0.017821	0.0214182	0.0181895	0.0163126	0.0377058	0.211655	0.0826682	0	0	0	0	0	0
10550	HSFX2	HGNC:32701	ENSG00000171129			ENSNSUG00000014534	Therian	0	966.84	0																		0.411912	0.00580605	0.0195207	0.00204591	0.0122744	0.0116533	0.0151699					0	0	0	0	0	0
10551	TMEM185A	HGNC:17125	ENSG00000155984	ENSGALG00000009139	ENSACAG00000010688	ENSNSUG00000007076	Therian	0	966.84	0				0.025	1	1			0.00383417	0.0150039	0.0772592	0.43365	0.58049			22	19.0085	0.0346503	0.0316202	0.0497231	0.0498148	0.0276242	0.0235147	0.0271919	0.0142597	0.0284979			0	0	0	0	0	0
10552	HSFX1	HGNC:29603	ENSG00000171116			ENSNSUG00000004432	Therian	806.04	966.84	0.833685																		0.0598057	0.0288982	0.0535913	0.0441552	0.0286722	0.0224214	0.0284022					0	0	0	0	0	0
10553	EOLA2	HGNC:17402	ENSG00000197021	ENSGALG00000009128	ENSACAG00000008621	ENSNSUG00000010228	Therian	0	966.84	0				0.001					0.271156	0.230547	0.180005	0.415451	0.297967			54.2	4.40544	0.0149548	0.03001	0.0237503	0.0571394	0.0221169	0.017878	0.0260019	0.0163126	0.0377058			0	0	0	0	0	0
10554	MAMLD1	HGNC:2568	ENSG00000013619	ENSGALG00000009098	ENSACAG00000022278	ENSNSUG00000010353	Therian	0	966.84	0	0.647			0.0259286	3	1	1	1	0.398129	0.233375		0.131509	0.472521	0.778086	0.778086		1.81297	0.068478	0.0389165	0.0820738	0.106029	0.0352331	0.0215193	0.0118766	0.0263517	0.0352628	0.321301	0.186652	0	0	0	0	0	0
10555	MTM1	HGNC:7448	ENSG00000171100	ENSGALG00000009096		ENSNSUG00000010114	Therian	0	966.84	0	0.255			0.0311875	3	1			0.0868998	0.0683805		0.353501	0.280832	0.743071	0.743071	3.1	8.45919	0.0461674	0.0221842	0.0319019	0.0259236	0.0190775	0.0224202	0.0223995	0.0837001	0.166252	0.307252	0.124476	0	0	0	0	0	0
10556	MTMR1	HGNC:7449	ENSG00000063601	ENSGALG00000009085	ENSACAG00000025182	ENSNSUG00000010105	Therian	0	966.84	0	0.31			0.064			1		0.0812283	0.0820523	0.048452	0.403334	0.484746	0.613574	0.613574	1.6	27.1572	0.0137811	0.0305396	0.023969	0.0322348	0.0194929	0.0233218	0.0490439	0.0204611	0.0236622	0.407449	0.052381	0	0	0	0	0	0
10557	CD99L2	HGNC:18237	ENSG00000102181	ENSGALG00000009075	ENSACAG00000008440	ENSNSUG00000015738	Therian	0	966.84	0	0.065			0.0804815					0.211699	0.156047		0.297314	0.311596	0.582434	0.582434	0.1	6.00798	0.00605223	0.0184849	0.0227501	0.0296279	0.0218396	0.0209535	0.00920942	0.00879306	0.0283639	0.0801084	0.00654736	0	0	0	0	0	0
10558	HMGB3	HGNC:5004	ENSG00000029993	ENSGALG00000009071	ENSACAG00000013274	ENSNSUG00000010104	Therian	164	826.84	0.198346	0.911			0.242962	12	1	6	1			0.0196333	0.180041	0.310217	0.580475	0.580475	112.5	535.941	0.0795811	0.0183097	0.0116896	0.00162185	0.0104324	0.00941494	0.0261496	0.128259	0.195109	0.172751	0.0884872	0	0	0	0	0	0
10559	GPR50	HGNC:4506	ENSG00000102195	ENSGALG00000009067	ENSACAG00000013273	ENSNSUG00000016662	Therian	0	826.84	0	0.073			0.1224					0.365858	0.0961071			0.170221			0.9	1.94489	0.00873866				0.00162739				0.00198769			0	0	0	0	0	0
10560	VMA21	HGNC:22082	ENSG00000160131	ENSGALG00000009065	ENSACAG00000013271	ENSNSUG00000010103	Therian	0	826.84	0				0.109722					0.0539166	0.139556	0.10513	0.0625	0.584813	0.630597	0.630597	31.3	44.8735	0.0266744	0.0200363	0.0215396	0.0241755	0.0204771	0.0161125	0.0206865	0.0207188	0.00891323	0.346255	0.0721536	0	0	0	0	0	0
10561	PASD1	HGNC:20686	ENSG00000166049		ENSACAG00000000987	ENSNSUG00000010101	Therian	0	826.84	0	0.052			0.0415							0.0985561					2.3		0.998754											0	0	0	0	0	0
10562	PRRG3	HGNC:30798	ENSG00000130032	ENSGALG00000007290	ENSACAG00000014130	ENSNSUG00000002848	Therian	0	826.84	0	0.224			0.0310488	2	1	2	1	0.0400828	0.0622937	0.00264231			0.25367	0.25367		0.809802	0.00629352	0.00637036	0.0260576	0.0306958	0.0126674	0.00684938	0.0168789			0.00474441		0	0	0	0	0	0
10563	FATE1	HGNC:24683	ENSG00000147378			ENSNSUG00000007620	Therian	0	826.84	0	0.072								0.493203			0.0634983						0.979283	0.00041633	0.0165212	0.0246	0.0111914	0.0111191	0.0114402					0	0	0	0	0	0
10564	CNGA2	HGNC:2149	ENSG00000183862	ENSGALG00000007282	ENSACAG00000028055	ENSNSUG00000018296	Therian	0	826.84	0	0.273			0.0239					0.0560472	0.0805928	0.0266567			0.254895	0.254895		0.020908	1								0.0371934	0.0192025	0.0102042	0	0	0	0	0	0
10565	GABRE	HGNC:4085	ENSG00000102287	ENSGALG00000020292	ENSACAG00000013990	ENSNSUG00000003082	Therian	0	826.84	0	0.374			0.1285	1	1	1	1	0.264916	0.0382766		0.142101	0.113696				0.894198	0.00295335	0.0311513	0.0140967	0.0964282	0.0160547	0.00531003	0.0769496	0.0017654	0.0262254			0	0	0	1	0	0
10566	GABRA3	HGNC:4077	ENSG00000011677	ENSGALG00000007269	ENSACAG00000013798	ENSNSUG00000018297	Therian	0	826.84	0	0.037			0.139208					0.056032	0.0397285	0.0134866		0.121837	0.253737			1.70763	0.00958019	0.00127433	0.000559004	0.00044207	0.000687099	0.00138402	0.00492619	0.0746204	0.0327706	0.00519538		0	0	0	0	0	0
10567	GABRQ	HGNC:14454	ENSG00000147402	ENSGALG00000007255	ENSACAG00000026695	ENSNSUG00000001873	Therian	0	826.84	0	0.108			0.0668158					0.2675	0.0069081	0.00857983		0.126019			1.1	0.0586783	0.0144639	0.00558658	5.2324e-05	0.000696605	0.000627456	0.000174115	0.00619854					0	0	0	0	0	0
10568	CETN2	HGNC:1867	ENSG00000147400	ENSGALG00000007510	ENSACAG00000026695	ENSNSUG00000020638	Therian	0	826.84	0	0.206			0.14475					0.0364043	0.135876	0.00857983	0.367779	0.269184	0.343226	0.343226	90.5	40.6566	0.0201164	0.0431291	0.0262812	0.00847891	0.0325225	0.0292489	0.0225748	0.123359	0.174178	0.115009	0.512716	0	0	0	0	0	0
10569	NSDHL	HGNC:13398	ENSG00000147383	ENSGALG00000007493	ENSACAG00000015812	ENSNSUG00000020639	Therian	0	826.84	0	0.073			0.065					0.138619	0.0490483	0.0969276	0.399153	0.179655	0.410571	0.410571	56.5	23.6702	0.0137707	0.0210239	0.0149635	0.0112876	0.0165437	0.0134591	0.052966	0.0163329	0.321679	0.177775	0.0683591	0	0	0	1	0	0
10570	ZNF185	HGNC:12976	ENSG00000147394	ENSGALG00000007488	ENSACAG00000015811	ENSNSUG00000020639	Therian	0	826.84	0	0.069			0.0342727					0.398527			0.140159	0.189986	0.275603	0.275603	0.1	2.01983	0.00605943	0.038573	0.00735586	0.0293027	0.0139747	0.0021993	0.218197			0.907103	0.289648	0	0	0	1	0	0
10571	PNMA5	HGNC:18743	ENSG00000198883			ENSNSUG00000007957	Therian	0	826.84	0	0.064			0.0125					0.397204			0.0625				36.7		0.164381	0.000823327	0.000507238	0.00057997	0.000938702	0.000468654	0.00224125					0	0	0	0	0	0
10572	PNMA3	HGNC:18742	ENSG00000183837			ENSNSUG00000019157	Therian	0	826.84	0	0.165			0.0217368					0.270088									0.0269717	0.000871665	0.00463166	0.000349149	0.00109135	0.00137037	0.00183374					0	0	0	0	0	0
10573	PWWP4	HGNC:55197	ENSG00000235675		ENSACAG00000029642	ENSNSUG00000011827	Therian	0	826.84	0											0.0107522																		0	0	0	0	0	0
10574	MAGEA1	HGNC:6796	ENSG00000198681			ENSNSUG00000006204	Therian	0	826.84	0	0.133			0.00775												5.3		0.997728			0.188261			0.288547					0	0	0	0	0	0
10575	ZNF275	HGNC:13069	ENSG00000063587			ENSNSUG00000006120	Therian	0	826.84	0	0.141			0.164108					0.0927086			0.0625				0.5		0.0269052	0.0272118	0.100368	0.124462	0.026758	0.0171959	0.00895421					0	0	0	0	0	0
10576	TREX2	HGNC:12270	ENSG00000213397		ENSACAG00000009779	ENSNSUG00000015675	Therian	0	826.84	0	0.038								0.216336		0.282116	0.471577						0.0140765	0.022819	0.0175839	0.100044	0.0215359	0.0192688	0.0294317					0	0	0	0	0	0
10577	HAUS7	HGNC:32979	ENSG00000213397		ENSACAG00000009779	ENSNSUG00000015675	Therian	0	826.84	0									0.216336		0.282116	0.471577				39.3		0.00845948	0.0196242	0.0199081	0.0515396	0.0208888	0.0144841	0.0166719					0	0	0	0	0	0
10578	BGN	HGNC:1044	ENSG00000182492		ENSACAG00000009615	ENSNSUG00000015677	Therian	0	826.84	0	0.973			0.0355					0.0219793		0.0884106	0.422869		0.76747				0.00344704	0.0122382	0.00586702	0.00651594	0.0148844	0.00212076	0.0069847			0.292445		0	0	0	0	0	0
10579	ATP2B3	HGNC:816	ENSG00000067842		ENSACAG00000009210	ENSNSUG00000015687	Therian	0	826.84	0	0.34			0.0561154	2	1	3	1	0.0123665		0.0833238			0.252806	0.252806			0.00228938	0.000447181	0.000395332	0.000711584	0.00050964	0.0025649	0.000384098			0.0081942	0.00392209	0	0	0	0	0	0
10580	DUSP9	HGNC:3076	ENSG00000130829		ENSACAG00000009178	ENSNSUG00000015691	Therian	0	826.84	0	0.483			0.224					0.0945071					0.579322	0.579322	0.6		0.0529921	0.00228949	0.0472682	0.00145447	0.00052336	0.00021021	0.00557595			0.234716	0.13619	0	0	0	0	0	0
10581	PNCK	HGNC:13415	ENSG00000130822		ENSACAG00000008973	ENSNSUG00000015692	Therian	0	826.84	0	0.113			0.029					0.0299919		0.154237			0.272779	0.272779			0.0140505	0.0662095	0.000652863	0.0115669	0.00761731	0.101382	0.00166			0.0403184	0.0302059	0	0	0	1	0	0
10582	SLC6A8	HGNC:11055	ENSG00000130821		ENSACAG00000008691	ENSNSUG00000015694	Therian	0	826.84	0	0.415			0.240375					0.0108696			0.252296		0.462709	0.462709	149.3	7.39323	0.0133204	0.021159	0.00549335	0.0207721	0.0167065	0.0469805	0.0101422			0.301976	0.0366968	1	0	0	0	0	0
10583	BCAP31	HGNC:16695	ENSG00000185825		ENSACAG00000008629	ENSNSUG00000015695	Therian	0	826.84	0	0.195			0.248					0.130281		0.0917167	0.332056		0.518494	0.518494	285		0.0262239	0.0309545	0.0160649	0.0242485	0.0240456	0.0180943	0.0285777			0.482166	0.0815809	0	0	0	1	0	0
10584	ABCD1	HGNC:61	ENSG00000101986		ENSACAG00000008539	ENSNSUG00000015697	Therian	0	826.84	0	0.376								0.0543651			0.0829879		0.368647	0.368647	0.6		0.054051	0.0323903	0.015817	0.0718905	0.0734713	0.0376174	0.0162266			0.0935271	0.122222	0	0	0	0	0	0
10585	PLXNB3	HGNC:9105	ENSG00000198753		ENSACAG00000008378	ENSNSUG00000015699	Therian	0	826.84	0	0.157				1				0.106819					0.40602	0.40602	0.1		0.00847679	0.0317452	0.00151795	0.0722996	0.0428157	0.0541608	0.0203075			0.615734	0.225716	1	0	0	0	0	0
10586	SRPK3	HGNC:11402	ENSG00000184343	ENSGALG00000006544	ENSACAG00000008280	ENSNSUG00000014715	Therian	0	826.84	0	0.184								0.0295078	0.305482	0.0952654	0.101413		0.601741	0.601741		0.107439	0.00400587	0.0213152	0.00698985	0.0202986	0.0203881	0.0208733	0.00922152	0.0942767	0.0326954	0.353375	0.196681	0	0	0	1	0	0
10587	IDH3G	HGNC:5386	ENSG00000067829		ENSACAG00000008220	ENSNSUG00000015701	Therian	0	826.84	0	0.084			0.0633333					0.035518		0.0896239	0.456141		0.776541	0.776541	34		0.0174622	0.0254541	0.0268209	0.0303115	0.0241028	0.022919	0.0220603			0.32194	0.09099	0	0	0	0	0	0
10588	SSR4	HGNC:11326	ENSG00000180879		ENSACAG00000011328	ENSNSUG00000015011	Therian	0	826.84	0	0.359								0.0277391		0.122209	0.443485		0.443962	0.443962	309.4		0.018891	0.0334584	0.0156419	0.0119905	0.0184634	0.0119825	0.0214993			0.152141	0.411917	0	0	0	1	0	0
10589	PDZD4	HGNC:21167	ENSG00000067840		ENSACAG00000011417	ENSNSUG00000015010	Therian	0	826.84	0	0.364			0.248889					0.0454846		0.0472669	0.0800947		0.264285	0.264285			0.003121	0.00664196	0.00107148	0.00291139	0.00718757	0.00682278	0.0027614			0.0367177	0.0126543	0	0	0	0	0	0
10590	L1CAM	HGNC:6470	ENSG00000198910		ENSACAG00000011487	ENSNSUG00000015009	Therian	0	826.84	0	0.345			0.192357					0.0889557		0.277791	0.138008		0.271659	0.271659	0.3		0.00044916	0.0132199	0.000735647	0.0263527	0.00241238	0.0334684	0.00499117			0.0488643	0.0114328	1	0	0	0	0	0
10591	AVPR2	HGNC:897	ENSG00000126895	ENSGALG00000009497	ENSACAG00000021016	ENSNSUG00000009929	Therian	0	826.84	0	0.153			0.022					0.102288	0.179881	0.0930763		0.152198					0.00551705	0.0162298	0.00356884	0.127818	0.052229	0.016625	0.0240248	0.00991765	0.00535602		0.0243448	0	0	0	0	0	0
10592	ARHGAP4	HGNC:674	ENSG00000089820		ENSACAG00000011924	ENSNSUG00000014999	Therian	0	826.84	0	0.105			0.059					0.115021		0.0970874	0.159189		0.293128	0.293128			0.00945115	0.0133727	0.0116106	0.0253593	0.0193767	0.0125296	0.0176363			0.136614	0.16171	0	0	0	1	0	0
10593	NAA10	HGNC:18704	ENSG00000102030		ENSACAG00000012233	ENSNSUG00000014942	Therian	0	826.84	0				0.0204286			3	1	0.0471494		0.0289855	0.479094		0.546124	0.546124	103.3		0.00652526	0.0286624	0.0187332	0.0226311	0.0281418	0.0238635	0.0234738			0.18469	0.736749	0	0	0	0	0	0
10594	RENBP	HGNC:9959	ENSG00000102032		ENSACAG00000012283	ENSNSUG00000014941	Therian	0	826.84	0	0.074								0.172096		0.136711	0.152251		0.40879	0.40879	1.5		0.00227131	0.00790494	0.00361295	0.0150137	0.00846424	0.0248686	0.00779523			0.0698805	0.0764359	0	0	0	0	0	0
10595	HCFC1	HGNC:4839	ENSG00000172534		ENSACAG00000012364	ENSNSUG00000014919	Therian	164	826.84	0.198346	0.304			0.1478			1		0.049894		0.140964			0.723243	0.723243	23.9		0.0276381	0.0306458	0.0316076	0.0337843	0.0458182	0.0363812	0.0310136			0.247735	0.12467	0	1	0	0	0	0
10596	TMEM187	HGNC:13705	ENSG00000177854		ENSACAG00000012472	ENSNSUG00000014918	Therian	0	826.84	0	0.091										0.278503			0.536484	0.536484	0.6		0.0190536	0.0305727	0.0307474	0.0129178	0.0229369	0.0202223	0.0243611			0.307519	0.0704892	0	0	0	0	0	0
10597	IRAK1	HGNC:6112	ENSG00000184216		ENSACAG00000012475	ENSNSUG00000014917	Therian	0	826.84	0	0.16			0.0197647					0.194075		0.356962	0.287078		0.719365	0.719365	5.6		0.00995288	0.0371237	0.0243866	0.0132441	0.0233095	0.0218195	0.0338482			0.236116	0.217594	0	0	0	0	0	0
10598	MECP2	HGNC:6990	ENSG00000169057		ENSACAG00000012519	ENSNSUG00000014916	Therian	164	826.84	0.198346	0.359			0.133879			19	1	0.0738668		0.170329	0.295684		0.330958	0.330958	6.6		0.00900634	0.0391778	0.0275437	0.0521989	0.0259167	0.030747	0.0181088			0.1521	0.0672026	1	0	0	0	0	0
10599	OPN1LW	HGNC:9936	ENSG00000102076		ENSACAG00000012605	ENSNSUG00000014906	Therian	0	826.84	0	0.204			0.0005					0.133084		0.117815							0.897831			0.163273								1	0	0	0	0	0
10600	TEX28	HGNC:2563	ENSG00000102080		ENSACAG00000008749	ENSNSUG00000002088	Therian	0	826.84	0	0.075			0.124					0.381395		0.107584							0.999721			1.66676e-08								0	0	0	0	0	0
10601	TKTL1	HGNC:11835	ENSG00000007350			ENSNSUG00000013873	Therian	0	826.84	0	0.158			0.1605					0.363414			0.232356				66.7		0.947608	0.000518857	0.00727801	0.00916407	0.00483932	0.00387405	0.00419622					0	0	0	0	0	0
10602	FLNA	HGNC:3754	ENSG00000196924		ENSACAG00000009800	ENSNSUG00000015014	Therian	0	826.84	0	0.752			0.123667					0.0179547		0.0341451	0.208344		0.57257	0.57257	2.4		0.0027216	0.0897182	0.0214701	0.100732	0.101444	0.108835	0.0176372			0.261355	0.154403	0	0	0	0	0	0
10603	EMD	HGNC:3331	ENSG00000102119		ENSACAG00000024462	ENSNSUG00000014890	Therian	0	826.84	0	0.055			0.189					0.168891		0.516688	0.385265				23.6		0.0142909	0.0354412	0.0361384	0.0997555	0.0327662	0.0326081	0.0214758					0	0	0	0	0	0
10604	RPL10	HGNC:10298	ENSG00000147403		ENSACAG00000008192	ENSNSUG00000015702	Therian	164	826.84	0.198346	0.254			0.00788235							0.00875365	0.34242		0.774901		194.9		0.00385418	0.0334701	0.0677254	0.048102	0.0291953	0.0240266	0.0260439			0.322622		0	1	0	0	0	0
10605	DNASE1L1	HGNC:2957	ENSG00000013563		ENSACAG00000008098	ENSNSUG00000015705	Therian	0	826.84	0	0.154			0.00552632					0.200432		0.235773	0.226361		0.606068	0.606068	1.3		0.0070358	0.0167962	0.0194408	0.0293693	0.0227396	0.0124692	0.0267946			0.346956	0.051215	0	0	0	1	0	0
10606	TAZ	HGNC:11577	ENSG00000102125		ENSACAG00000012677	ENSNSUG00000015706	Therian	0	826.84	0	0.26			0.169875					0.0241421		0.0909508			0.299099	0.299099	5.5		0.00543553	0.0200802	0.0249888	0.0305698	0.0252544	0.01931	0.0254187			0.835844	0.155691	0	0	0	0	0	0
10607	ATP6AP1	HGNC:868	ENSG00000071553	ENSGALG00000008836	ENSACAG00000012772	ENSNSUG00000011430	Therian	0	826.84	0	0.065			0.047					0.126297	0.342961		0.477449	0.385217	0.514606	0.514606	132.1	24.8102	0.0166373	0.0238772	0.0217537	0.0190147	0.0177312	0.0138161	0.0218469	0.0139727	0.0253546	0.293833	0.0576856	0	0	0	0	0	0
10608	GDI1	HGNC:4226	ENSG00000203879		ENSACAG00000015546	ENSNSUG00000015732	Therian	0	826.84	0	0.237			0.219143					0.0181782		0.0244905	0.240376		0.72421	0.72421	19.4		0.0115086	0.0155379	0.0198744	0.025885	0.0174001	0.0146264	0.0126979			0.242895	0.0250083	0	0	0	0	0	0
10609	FAM50A	HGNC:18786	ENSG00000071859		ENSACAG00000005285	ENSNSUG00000015733	Therian	0	826.84	0	0.075			0.023					0.00648357		0.015103	0.450552		0.587764	0.587764	55.8		0.00647645	0.0298814	0.0174016	0.0205664	0.0234443	0.0257276	0.0183511			0.111637	0.299405	0	0	0	0	0	0
10610	PLXNA3	HGNC:9101	ENSG00000130827		ENSACAG00000005063	ENSNSUG00000015736	Therian	0	826.84	0	0.114			0.0904667					0.0308765			0.179154		0.27054	0.27054	0.8		0.0126238	0.0244688	0.0486059	0.0238825	0.0234048	0.0138182	0.0250982			0.0353778	0.0422689	1	1	0	0	0	0
10611	UBL4A	HGNC:12505	ENSG00000102178		ENSACAG00000005040	ENSNSUG00000015738	Therian	0	826.84	0	0.076			0.0555833					0.0760551		0.0800918	0.305431		0.628954	0.628954	18.2		0.00497557	0.0263347	0.0228683	0.0283031	0.0271788	0.024268	0.0291194			0.397485	0.139454	0	0	0	0	0	0
10612	SLC10A3	HGNC:22979	ENSG00000126903		ENSACAG00000005038	ENSNSUG00000015739	Therian	0	826.84	0	0.242			0.341143					0.119893		0.0945924	0.240013		0.602803	0.602803	5.5		0.0128153	0.0397608	0.0503188	0.0702703	0.0424173	0.0293338	0.0360181			0.0787266	0.0549877	0	0	0	0	0	0
10613	FAM3A	HGNC:13749	ENSG00000071889		ENSACAG00000004999	ENSNSUG00000015740	Therian	0	826.84	0	0.213			0.0308667					0.0953031		0.0767949	0.418652		0.479092	0.479092	6.8		0.00742172	0.0282612	0.0301523	0.0362783	0.0209859	0.0196953	0.0217049			0.52182	0.11079	0	0	0	0	0	0
10614	G6PD	HGNC:4057	ENSG00000160211		ENSACAG00000012437	ENSNSUG00000014406	Therian	0	826.84	0	0.364			0.271833					0.0353511		0.0549056	0.402576		0.510565		18.7		0.0768491	0.0197443	0.0448587	0.0143861	0.0299936	0.0119031	0.0420472			0.489653		0	0	0	0	0	0
10615	IKBKG	HGNC:5961	ENSG00000073009		ENSACAG00000009337	ENSNSUG00000016071	Therian	0	826.84	0	0.372			0.0317					0.0677221		0.110459	0.142634				2.4		0.0152882	0.0258656	0.0228414	0.0337876	0.0264103	0.0239311	0.0271164					0	0	0	0	0	0
10616	GAB3	HGNC:17515	ENSG00000160219	ENSGALG00000008408	ENSACAG00000011922	ENSNSUG00000020600	Therian	0	826.84	0	0.21			0.0532414					0.313912	0.189182	0.10466	0.175335	0.243614	0.451186	0.451186		0.24158	0.0415812	0.0112859	0.0074729	0.0697938	0.0249041	0.0145604	0.0132166	0.0257332	0.0228603	0.321459	0.0970832	0	0	0	0	0	0
10617	LOC772071	NCBI:772071		ENSGALG00000008404		ENSNSUG00000020601	Therian	0	826.84	0										0.292736			0.50075				20.2952								0.033575	0.0637563			0	0	0	0	0	0
10618	DKC1	HGNC:2890	ENSG00000130826	ENSGALG00000005054	ENSACAG00000015600	ENSNSUG00000000145	Therian	0	826.84	0	0.957			0.0160714					0.123556	0.111277	0.0939783	0.439475	0.34828	0.544856	0.544856	185.5	227.104	0.037002	0.0271922	0.0331028	0.0207074	0.0247068	0.0227746	0.0418896	0.0848925	0.218173	0.200918	0.0959599	0	0	0	0	0	0
10619	MPP1	HGNC:7219	ENSG00000130830	ENSGALG00000005071	ENSACAG00000015502	ENSNSUG00000000204	Therian	0	826.84	0	0.9			0.31825					0.0872852	0.0549767	0.0809149	0.353788	0.618184	0.313121	0.313121	3.9	90.3999	0.00932683	0.0278177	0.014352	0.0234623	0.0184858	0.0217953	0.0115743	0.10987	0.0348977	0.097516	0.0218657	0	0	0	0	0	0
10620	SMIM9	HGNC:41915	ENSG00000203870			ENSNSUG00000003806	Therian	0	826.84	0									0.67963																				0	0	0	0	0	0
10621	F8	HGNC:3546	ENSG00000185010	ENSGALG00000005077	ENSACAG00000000601	ENSNSUG00000001742	Therian	0	826.84	0	0.086			0.056375					0.400854	0.313537		0.20847	0.123607	0.360905	0.360905	0.9	6.25755	0.018954	0.0254094	0.036921	0.0320041	0.0237627	0.0131766	0.00473699	0.00693427	0.000837873	0.692703	0.138943	0	0	0	0	0	0
10622	H2AB1	HGNC:22516	ENSG00000198082		ENSACAG00000014601	ENSNSUG00000008152	Therian	0	826.84	0	0.091								0.2552									0.922437			0.252637								0	0	0	0	0	0
10623	F8A1	HGNC:3547	ENSG00000197932			ENSNSUG00000013699	Therian	0	826.84	0	0.166			0.0035					0.0787716									0.00706579	0.0206966	0.0155074	0.00585928	0.0279377	0.0240794	0.024785					0	0	0	0	0	0
10624	FUNDC2	HGNC:24925	ENSG00000165775	ENSGALG00000005381	ENSACAG00000000526	ENSNSUG00000018356	Therian	0	826.84	0	0.03			0.049413					0.133416	0.142351		0.52078	0.476173	0.609838	0.609838	27.5	46.56	0.0262115	0.0327851	0.0328641	0.0402485	0.0221808	0.0272724	0.0146364			0.183816	0.0757586	0	0	0	0	0	0
10625	MTCP1	HGNC:7423	ENSG00000182712	ENSGALG00000023937	ENSACAG00000000517	ENSNSUG00000000570	Therian	0	826.84	0	0.172			0.06					0.106854	0.287032	0.373709	0.446013	0.336877	0.541481	0.541481	0.5	3.35154	0.0594619	0.0296945	0.0455767	0.060272	0.031493	0.0241239	0.0265452	0.0355976	0.0252365	0.461697	0.227718	0	0	0	0	0	0
10626	BRCC3	HGNC:24185	ENSG00000185515	ENSGALG00000005383	ENSACAG00000000447	ENSNSUG00000000576	Therian	0	826.84	0	0.137			0.05675					0.160931		0.0104268	0.323888	0.111111	0.95116	0.95116	8.2	29.4696	0.00373326	0.0263998	0.0184934	0.0215014	0.0202928	0.0247703	0.034966	0.0466802	0.10326	0.262837	0.214764	0	0	0	0	0	0
10627	VBP1	HGNC:12662	ENSG00000155959	ENSGALG00000008389	ENSACAG00000011753	ENSNSUG00000020602	Therian	0	826.84	0	0.944			0.0254545	2	1			0.0373684	0.193768	0.0700328	0.650137	0.236748	0.7753	0.7753	120.1	133.957	0.0121	0.0215672	0.0182199	0.0221442	0.018089	0.0186388	0.0187695	0.105164	0.0835576	0.322456	0.246967	0	0	0	0	0	0
10628	RAB39B	HGNC:16499	ENSG00000155961	ENSGALG00000008384		ENSNSUG00000020603	Therian	0	826.84	0	0.432			0.240864	4	1	3	1	0.0251142	0.00959693			0.333746	0.376443	0.376443	0.3		0.0068567	0.0104549	0.00148419	0.00227099	0.00144992	0.002411	0.00160374			0.171527	0.00936317	0	0	0	0	0	0
10629	CLIC2	HGNC:2063	ENSG00000155962	ENSGALG00000004730		ENSNSUG00000000577	Therian	0	826.84	0	0.198			0.0500769						0.0349755		0.288654	0.306716	0.42321		0.8	0.650604	0.00375935	0.0144211	0.0220304	0.0123527	0.0165718	0.00938833	0.0154522			0.590723		0	0	0	0	0	0
10630	H2AB2	HGNC:18298	ENSG00000198307		ENSACAG00000024458	ENSNSUG00000001933	Therian	0	826.84	0	0.113								0.2485																				0	0	0	0	0	0
10631	TMLHE	HGNC:18308	ENSG00000185973	ENSGALG00000007443	ENSACAG00000015669	ENSNSUG00000000095	Therian	0	826.84	0	0.168			0.0253					0.154315	0.0499121		0.375038	0.235443	0.437549	0.437549	0.9	20.9916	0.00570614	0.0182253	0.0239318	0.0439985	0.023278	0.0290924	0.0215965	0.0258928	0.227607	0.571364	0.0878516	0	0	0	0	0	0
10632	LOC769755	CGNC:55505		ENSGALG00000004975		ENSNSUG00000002124	Therian	0	826.84	0										0.00499233							5.93314								0.014285	0.0281163			0	0	0	0	0	0
10633	SPRY3	HGNC:11271	ENSG00000168939	ENSGALG00000007448	ENSACAG00000015693	ENSNSUG00000000072	Therian	0	826.84	0	0.601			0.1795					0.116612		0.132913		0.226185				0.0719165	0.0123888	0.0166238	0.0160714	0.0310605	0.0243302	0.0202969	0.0167334	0.00107406	0.00568621			0	0	0	0	0	0
10634	VAMP7	HGNC:11486	ENSG00000124333	ENSGALG00000007476	ENSACAG00000015766	ENSNSUG00000020640	Therian	0	826.84	0	0.187			0.154056					0.456154	0.0651534	0.0230034	0.115972	0.187717	0.741737			24.6956	0.0170612	0.0282509	0.0185035	0.042706	0.0249507	0.0270895	0.0242968	0.154299	0.414818	0.164484		0	0	0	0	0	0
10635	WASH6P	HGNC:31685	ENSG00000182484	ENSGALG00000012974		ENSNSUG00000009848	Therian	0	826.84	0										0.142049			0.446341				18.4288								0.0707607	0.104902			0	0	0	0	0	0
20001	LMAN1	HGNC:6631	ENSG00000074695	ENSGALG00000034821	ENSACAG00000007617	ENSNSUG00000014413	Avian	0	74	0	0.086	-0.0543574	0.467237	0.147538					0.0980392	0.105169	0.140998	0.190989		0.32889	0.32889	30.8	74.9842	0.0130381	0.0328287	0.0306249	0.0204555	0.0256029	0.0176386	0.0225343	0.0167201	0.149609	0.0533604	0.0355421	0	1	0	0	0	0
20002	CPLX4	HGNC:24330	ENSG00000166569	ENSGALG00000038426	ENSACAG00000007605	ENSNSUG00000014412	Avian	0	74	0	0.187	0.524434	0.11491	0.061625			1	1	0.044291	0.253581	0.0752175			0.43265		0.7	0.100991	0.0324716	0.0281381	0.0308767	0.0139231	0.024596	0.0143664	0.0197338			0.344121		0	0	0	0	0	0
20003	RAX	HGNC:18662	ENSG00000134438	ENSGALG00000033279	ENSACAG00000007597	ENSNSUG00000000122	Avian	0	74	0	0.23	0.282474	-0.0561221	0.0088	3		3	1	0.0625679	0.105834								0.215241								0.392899			0	0	0	0	0	0
20004	GRP	HGNC:4605	ENSG00000134443	ENSGALG00000040959		ENSNSUG00000014410	Avian	0	74	0	0.124	0.650448	0.237486	0.169333					0.308935	0.0404651				0.262053	0.262053	1.7	2.24378	0.0875204	0.121071			0.00294602	0.0526928	0.00292363	0.00680928	0.0188531	0.0293403		0	0	0	0	0	0
20005	SEC11C	HGNC:23400	ENSG00000166562	ENSGALG00000031663	ENSACAG00000007564	ENSNSUG00000014409	Avian	0	74	0	0.269	0.808291	0.359873						0.0295983	0.0890541	0.0259077	0.367417		0.314757	0.314757	28.7	65.7072	0.011642	0.0728514	0.00834215	0.0033329	0.0110365	0.00864819	0.0119832	0.0471015	0.0586574	0.0906781	0.0355084	0	0	0	1	0	0
20006	ZNF532	HGNC:30940	ENSG00000074657	ENSGALG00000041052	ENSACAG00000007475	ENSNSUG00000014297	Avian	37	74	0.5	0.761	-0.142449	0.36224	0.362957	12	1	7	1	0.0696955	0.0979574	0.0486007	0.201453		0.399646	0.399646	2.7		0.0190496	0.0595861	0.0428598	0.0500066	0.0390557	0.0322956	0.0243539	0.0553529	0.0239445	0.16577	0.0934661	1	0	0	0	0	0
20007	MALT1	HGNC:6819	ENSG00000172175	ENSGALG00000030063	ENSACAG00000010025	ENSNSUG00000014296	Avian	0	74	0		0.955533	-0.296058						0.138994	0.163246	0.160665	0.308387		0.869469	0.869469										0.00378255	0.0147589	0.218193	0.0179684	0	0	0	0	0	0
20008	ALPK2	HGNC:20565	ENSG00000198796	ENSGALG00000054655	ENSACAG00000010018	ENSNSUG00000014295	Avian	0	74	0	0.033	0.888417	-0.562622	0.031					0.512251			0.0819919		0.840649			0.559865	0.0112525	0.00116822	0.000390799	0.000457587	0.000428702	0.00144011	0.00103802			0.283582		0	1	0	0	0	0
20009	NEDD4L	HGNC:7728	ENSG00000049759	ENSGALG00000034584	ENSACAG00000009877	ENSNSUG00000013749	Avian	37	74	0.5	0.378	-0.213418	-0.631158	0.237209	14	1	7	1	0.019084	0.0208522	0.0954357	0.307108		0.559742	0.559742	0.7	32.7513	0.00804968	0.0754637	0.00646063	0.00253455	0.00676762	0.0200466	0.00959227	0.0121742	0.0401018	0.26135	0.0913369	0	0	0	0	0	0
20010	ATP8B1	HGNC:3706	ENSG00000081923	ENSGALG00000030834	ENSACAG00000009654	ENSNSUG00000013746	Avian	0	74	0	0.12	0.303108	-1.43026	0.136958					0.0433107	0.0910393	0.0976137	0.341991		0.679682	0.679682	11.2	7.9342	0.00138097	0.0312814	0.00301165	0.0110542	0.0170674	0.0113968	0.035079	0.180685	0.00782455	0.277431	0.0151105	1	0	0	0	0	0
20011	NARS1	HGNC:7643	ENSG00000134440	ENSGALG00000040506	ENSACAG00000009539	ENSNSUG00000013209	Avian	0	74	0	0.426	0.466699	-1.423	0.0333462					0.0536989	0.0463961		0.47047		0.746001		113.8	191.439	0.0144151	0.0262122	0.0218023	0.0170627	0.0255973	0.0253636	0.0276049	0.0157008	0.034626	0.16232		0	1	0	0	0	0
20012	FECH	HGNC:3647	ENSG00000066926	ENSGALG00000038461	ENSACAG00000009424	ENSNSUG00000013208	Avian	0	74	0	0.355	0.909979	-1.8708	0.02425					0.148575	0.0420732	0.0628838	0.0838199		0.696882		1	50.942	0.0165701	0.0289109	0.0251235	0.0282094	0.0253071	0.0268448	0.0244109	0.041917	0.0536841	0.358741		0	0	0	1	0	0
20013	ONECUT2	HGNC:8139	ENSG00000119547	ENSGALG00000035751	ENSACAG00000009410	ENSNSUG00000013207	Avian	0	74	0	0.099			0.334908	37	1	37	1	0.0070529	0.0659285	0.110741						0.179316	0.0193854	0.00255146	0.00396205	0.000828438	0.00157931	0.00070351	0.000693776	0.0407255	0.0039424		0.0156186	0	0	0	0	0	0
20014	ST8SIA3	HGNC:14269	ENSG00000177511	ENSGALG00000039151	ENSACAG00000009347	ENSNSUG00000013206	Avian	37	74	0.5	0.402	0.416197	0.366075	0.154838	1	1	1	1	0.0276657	0.0151871	0.0155327			0.269685	0.269685			0.00254756	8.96821e-05	4.55901e-05		3.18977e-05	0.0011797	3.65877e-05	0.0177657	0.00103111	0.00622482		0	0	0	0	0	0
20015	WDR7	HGNC:13490	ENSG00000091157	ENSGALG00000032776	ENSACAG00000009169	ENSNSUG00000013204	Avian	0	74	0	0.248	0.330881	-0.390253	0.130381	9	1	9	1	0.0451781		0.0721532	0.13059		0.31289	0.31289	2.2	5.86091	0.0144222	0.0186107	0.0112384	0.0226818	0.0187139	0.0189574	0.0148662	0.00983179	0.039896	0.0744411	0.0546185	0	1	0	0	0	0
20016	TXNL1	HGNC:12436	ENSG00000091164	ENSGALG00000033862	ENSACAG00000009121	ENSNSUG00000013203	Avian	37	74	0.5	0.397	0.744849	0.0169038	0.0497778	2	1	3	1	0.0189911	0.00977781	0.0738781	0.582081		0.660936	0.660936	92.9	176.686	0.030749	0.0235609	0.0205493	0.0133045	0.0206163	0.0189175	0.0216483	0.00959858	0.0607889	0.222045	0.111966	0	0	0	0	0	1
20017	TCF4	HGNC:11634	ENSG00000196628		ENSACAG00000008863	ENSNSUG00000013120	Avian	37	74	0.5	0.959	1.47735	0.574829	0.376182	4	1	45	1	0.0688935		0.103212	0.0846025		0.336835	0.336835	0.4	2.22141	0.0242946	0.0148473	0.0351255	0.0536474	0.0335172	0.0226149	0.018208			0.0979813	0.0912488	1	0	0	1	0	1
20018	CCDC68	HGNC:24350	ENSG00000166510		ENSACAG00000008853	ENSNSUG00000007799	Avian	0	131	0	0.062	0.269523	0.0486702	0.0261034					0.264071			0.284012		0.272917				0.0586705	0.024178	0.0708642	0.108399	0.0175082	0.00670518	0.0100566			0.916029		0	0	0	1	0	0
20019	RAB27B	HGNC:9767	ENSG00000041353		ENSACAG00000008824	ENSNSUG00000013116	Avian	0	131	0	0.239	0.823807	0.0518365	0.0850698					0.0569322		0.117904			0.522657	0.522657			0.0227174	0.0429557	0.000850062	0.00275176	0.00238214	0.00197012	0.0824711			0.222257	0.0334535	0	0	0	0	0	0
20020	DYNAP	HGNC:26808	ENSG00000178690			ENSNSUG00000018387	Avian	0	131	0		0.891345	0.380728	0.039														0.021082	0.0124325	0.0222864	0.0286297	0.0105306	0.00895771	0.0125644					0	0	0	0	0	0
20021	C18orf54	HGNC:13796	ENSG00000166845		ENSACAG00000008812	ENSNSUG00000013115	Avian	0	131	0	0.053	0.705345	-0.536219	0.0436176					0.328484		0.223265	0.110626		0.528605	0.528605	7		0.402396	0.00767377	0.0215244	0.0475303	0.0308491	0.0165915	0.0211284			0.230223	0.0800468	0	0	0	0	0	0
20022	STARD6	HGNC:18066	ENSG00000174448		ENSACAG00000008796	ENSNSUG00000013114	Avian	0	131	0	0.053	-2.62354	0.128651	0.0283333					0.353986									0.785436	0.00533152	0.0198868	0.00957326	0.018069	0.0125926	0.0201489					0	0	0	0	0	0
20023	POLI	HGNC:9182	ENSG00000101751		ENSACAG00000008756	ENSNSUG00000013113	Avian	0	131	0	0.128	0.505397	0.430175	0.0162188					0.173328		0.261053	0.426566		0.643581	0.643581	3.1		0.072807	0.0300095	0.0458944	0.0483156	0.0308781	0.0249587	0.0214881			0.264504	0.194718	0	0	0	0	0	0
20024	MBD2	HGNC:6917	ENSG00000134046		ENSACAG00000008739	ENSNSUG00000015043	Avian	0	131	0	0.474	1.06909	0.525093	0.280538					0.0537897			0.378904		0.507688	0.507688	7.2		0.0557974	0.0232686	0.0206815	0.0250432	0.0204805	0.0220634	0.0388721			0.184316	0.146882	0	0	0	1	0	0
20025	DCC	HGNC:2701	ENSG00000187323		ENSACAG00000008602	ENSNSUG00000013107	Avian	0	180.6	0	0.975	0.686808	0.422606	0.124818			11	1	0.0412442		0.0629151	0.0625		0.300203	0.300203			0.31333	0.00299573	0.00284183	0.00582767	0.000745318	0.0083173	0.00327441			0.0122621	0.0621725	0	0	0	0	0	0
20026	MEX3C	HGNC:28040	ENSG00000176624		ENSACAG00000010265	ENSNSUG00000013103	Avian	205	543.54	0.377157	0.552			0.0406087					0.160438		0.0298018	0.0962767		0.645055	0.645055	3.1		0.178561	0.0216807	0.0411258	0.0627155	0.0339693	0.024732	0.0242673			0.387564	0.152707	0	0	0	0	0	1
20027	SMAD4	HGNC:6770	ENSG00000141646		ENSACAG00000010186	ENSNSUG00000013101	Avian	279.84	543.54	0.514847	1	0.86637	-2.53125	0.0611818			3		0.0175301		0.025995	0.168104		0.742233	0.742233	2.1		0.0268913	0.0376367	0.0345435	0.0527361	0.0365395	0.0369091	0.0224856			0.307623	0.198787	1	1	0	0	0	1
20028	ELAC1	HGNC:14197	ENSG00000141642		ENSACAG00000010178	ENSNSUG00000013099	Avian	0	543.54	0	0.124	0.259414	0.618002	0.0204211					0.0863493		0.133328	0.274047		0.62938	0.62938	3.1		0.0541329	0.0307351	0.0320983	0.0271316	0.0263855	0.0178618	0.0219227			0.361713	0.0991942	0	0	0	0	0	0
20029	ME2	HGNC:6984	ENSG00000082212		ENSACAG00000010123	ENSNSUG00000013096	Avian	70.84	543.54	0.130331	0.089	-0.289719	1.28384	0.075					0.099688			0.498677		0.380573	0.380573	0.7		0.0329203	0.0233826	0.015767	0.0145595	0.017416	0.0280788	0.0124292			0.310582	0.0523238	0	0	0	0	0	1
20030	MAPK4	HGNC:6878	ENSG00000141639		ENSACAG00000010066	ENSNSUG00000013095	Avian	78.04	543.54	0.143577	0.136	-0.249527	0.284258	0.165222			1		0.0281572			0.194593		0.390132	0.390132	0.3		0.00473019	0.03394	0.00483752	0.00745031	0.00194027	0.0228686	0.00205142			0.0433736		0	0	0	1	0	1
20031	SKA1	HGNC:28109	ENSG00000154839		ENSACAG00000010057	ENSNSUG00000016555	Avian	0	543.54	0		0.210059	-0.511792	0.000666667					0.297694			0.0625				24.8		0.214625	0.010588	0.0191914	0.0187311	0.0149976	0.0120993	0.046795					0	0	0	0	0	0
20032	CXXC1	HGNC:24343	ENSG00000154832		ENSACAG00000006087	ENSNSUG00000004054	Avian	0	590.94	0	0.117	1.02054	0.574327	0.0925			1	1	0.0286957		0.146183	0.418785		0.927555	0.927555	30.9		0.0294204	0.0242079	0.0276086	0.0316981	0.0258547	0.0236027	0.027027			0.263328	0.278233	0	0	0	1	0	0
20033	MBD1	HGNC:6916	ENSG00000141644		ENSACAG00000006091	ENSNSUG00000004395	Avian	0	590.94	0	0.68	0.612442	0.679448	0.0993704					0.538266			0.563589		0.450704	0.450704	13.5		0.103109	0.024885	0.0288005	0.0337988	0.0268057	0.0281883	0.026899			0.203966	0.413721	0	0	0	0	0	0
20034	CFAP53	HGNC:26530	ENSG00000172361		ENSACAG00000010023	ENSNSUG00000013092	Avian	0	590.94	0		0.995386	1.21622						0.311192		0.169091	0.0625		0.324566	0.324566			0.688791	0.00345927	0.0128556	0.000790348	0.00910841	0.00966793	0.0139792			0.159499	0.353323	0	0	0	0	0	0
20035	MYO5B	HGNC:7603	ENSG00000167306		ENSACAG00000017976	ENSNSUG00000013091	Avian	0	647.94	0	0.209	-1.07001	-1.42236	0.0738462					0.0776777			0.108663		0.574593	0.574593	0.9	0.486991	0.0332263	0.01858	0.00232163	0.000114198	0.0014937	0.00189099	0.0591299			0.310392	0.113878	1	0	0	0	0	0
20036	ACAA2	HGNC:83	ENSG00000167315	ENSGALG00000031142	ENSACAG00000017990	ENSNSUG00000013087	Avian	0	647.94	0	0.154	0.59469	-1.8784	0.0297647	1	1			0.11018	0.0709629		0.327828		0.811241	0.811241	47.2	64.8461	0.0127961	0.0102451	0.0108394	0.00876811	0.00927597	0.0212593	0.00732375	0.0117768	0.0140301	0.298706	0.0900455	0	0	0	1	0	0
20037	LIPG	HGNC:6623	ENSG00000101670	ENSGALG00000043734	ENSACAG00000017995	ENSNSUG00000012949	Avian	47.4	647.94	0.0731549	0.147	0.584988	-2.53125	0.06284					0.154257	0.0574693	0.175114	0.0772104		0.290768	0.290768	1	0.599913	0.0172087	0.00236492	0.00165425	0.0011598	0.00173143	0.00245286	0.00433579	0.014852	0.456162	0.859791	0.0438226	0	0	0	0	0	0
20038	RPL17	HGNC:10307	ENSG00000265681	ENSGALG00000036774	ENSACAG00000017998	ENSNSUG00000012945	Avian	305.64	647.94	0.47171	0.276	-1.91281	-1.75379													172.6		0.0125974	0.0302441	0.0733359	0.0385594	0.0241263	0.028152	0.0288331	0.0268851	0.0223278			0	0	0	0	0	1
20039	C18orf32	HGNC:31690	ENSG00000177576	ENSGALG00000052796	ENSACAG00000028947	ENSNSUG00000012944	Avian	44	647.94	0.0679075	0.148	0.717324	0.0909434	0.0249					0.223689	0.168839	0.408533	0.283598				12.8	23.5627	0.0178276	0.018099	0.0137598	0.0158275	0.0120795	0.0139827	0.0102653					0	0	0	1	0	1
20040	DYM	HGNC:21317	ENSG00000141627	ENSGALG00000037426	ENSACAG00000018002	ENSNSUG00000012943	Avian	114	647.94	0.175942	0.151	0.579901	0.0153746	0.041					0.0505206	0.0424784	0.0820586	0.232816		0.802485	0.802485	6.3	19.2656	0.058058	0.0347141	0.0300322	0.0277418	0.0267429	0.031759	0.0265661	0.145055	0.231766	0.11998	0.0567919	0	0	0	0	0	1
20041	SMAD7	HGNC:6773	ENSG00000101665	ENSGALG00000037160	ENSACAG00000018004	ENSNSUG00000012942	Avian	410.6	647.94	0.633701	0.604	0.316657	0.688455	0.4642	16	1	10	1	0.0417295	0.0606462	0.0364772	0.152354						0.00231404	0.0248648	0.0136074	0.0218592	0.0246373	0.0145369	0.020779	0.00513512	0.0412355		0.0495085	0	0	0	0	1	1
20042	CTIF	HGNC:23925	ENSG00000134030	ENSGALG00000035912	ENSACAG00000018006	ENSNSUG00000012893	Avian	248.64	686.94	0.361953		0.938572	-0.0781222	0.238552	1	1			0.0451216	0.0592334	0.0570265	0.213741		0.516221	0.516221	0.2	3.99252	0.00647681	0.0227513	0.0376893	0.0715067	0.0296322	0.0241688	0.0117926	0.0402726	0.0174616	0.0695621	0.0748109	0	0	0	0	0	1
20043	ZBTB7C	HGNC:31700	ENSG00000184828	ENSGALG00000033408	ENSACAG00000018007	ENSNSUG00000015889	Avian	57	686.94	0.0829767	0.26			0.132909	7	1	10	1	0.0340607	0.0841018				0.267747	0.267747		0.135807	0.0269213	0.00614356	0.0259649	0.0162919	0.00820925	0.00272958	0.115715	0.117353	0.452104	0.933717	0.130203	0	0	0	0	0	0
20044	SMAD2	HGNC:6768	ENSG00000175387	ENSGALG00000036001	ENSACAG00000018008	ENSNSUG00000009199	Avian	480	686.94	0.698751	1	0.854913	-0.153162	0.25513	6	1	3	1	0.00571755	0.012791		0.281412				7		0.0385014	0.0228547	0.0248751	0.0236714	0.0251481	0.0341457	0.024887	0.0429681	0.0687185		0.1045	0	1	0	0	0	0
20045	SKOR2	HGNC:32695	ENSG00000215474	ENSGALG00000051844	ENSACAG00000006146	ENSNSUG00000010155	Avian	0	731.94	0									0.0452037		0.0608174						0.0944732	0.81027											0	0	0	0	0	0
20046	IER3IP1	HGNC:18550	ENSG00000134049	ENSGALG00000032061		ENSNSUG00000010156	Avian	47.4	731.94	0.0647594	0.249	0.464177	0.0955188	0.0774667					0.0310263			0.631476				103.1		0.0197721	0.0283275	0.0240488	0.0331779	0.0237595	0.0186402	0.0232598	0.0317194	0.0256762			0	0	0	0	0	0
20047	HDHD2	HGNC:25364	ENSG00000167220	ENSGALG00000034801	ENSACAG00000012007	ENSNSUG00000002091	Avian	0	731.94	0	0.07	0.133476	-0.0339986	0.0600952	1		1	1	0.124281	0.0454166		0.48298		0.679187		17.2	7.24044	0.0181997	0.0189814	0.0148892	0.0121509	0.0138571	0.0160501	0.0146116	0.0264785	0.0329408	0.368087		0	0	0	0	0	0
20048	KATNAL2	HGNC:25387	ENSG00000167216	ENSGALG00000041882	ENSACAG00000012057	ENSNSUG00000010158	Avian	0	731.94	0	0.14			0.0256429					0.152599	0.275119	0.0653038	0.226793		0.678068	0.678068		0.918634	0.119139	0.0107841	0.0171582	0.00492959	0.00966637	0.0103468	0.0136393	0.727036	0.0599189	0.212102	0.705999	0	0	0	0	0	0
20049	PIAS2	HGNC:17311	ENSG00000078043	ENSGALG00000039434	ENSACAG00000012084	ENSNSUG00000010159	Avian	303.94	731.94	0.415253	0.978	1.02906	-2.53125	0.07636			1	1	0.0353673	0.0478556	0.0521789	0.109561		0.451166	0.451166	7.7	12.5077	0.36277	0.0161577	0.0185538	0.0277923	0.0186734	0.0255294	0.014812	0.0153734	0.0284401	0.554119	0.0890485	0	0	0	0	0	0
20050	ST8SIA5	HGNC:17827	ENSG00000101638	ENSGALG00000035927	ENSACAG00000012397	ENSNSUG00000008384	Avian	0	731.94	0	0.144	0.622937	-2.53125	0.186444					0.0927858	0.0254318				0.447428	0.447428	1.2	0.510608	0.0106845	0.0033694	0.00259703	0.00152956	0.00203931	0.00165288	0.00148828	0.0053739	0.00212548	0.558749	0.00650005	0	0	0	0	0	0
20051	LOXHD1	HGNC:26521	ENSG00000167210	ENSGALG00000037829	ENSACAG00000012527	ENSNSUG00000015142	Avian	0	784.94	0	0.143			0.074			1	1	0.040132	0.156063	0.133181	0.100862		0.464459	0.464459		0.0626992	0.704258	0.00110424	0.0126409	0.017873	0.00448921	0.0058784	0.00388648	0.512772	0.0639748	0.538261	0.173156	0	0	0	0	0	0
20052	RNF165	HGNC:31696	ENSG00000141622	ENSGALG00000031018	ENSACAG00000012611	ENSNSUG00000019953	Avian	88.3	784.94	0.112493	0.132	0.515055	0.869832	0.244347	25	1	23	1	0.0242315	0.0251306				0.262883	0.262883		7.00658	0.00555577	0.0199282	0.00191764	0.00158568	0.00296921	0.00360944	0.00538785		0.0267558	0.00671179	0.0450483	0	0	0	0	0	1
20053	C18orf25	HGNC:28172	ENSG00000152242	ENSGALG00000041081	ENSACAG00000012627	ENSNSUG00000007260	Avian	442.1	784.94	0.563228	0.367	0.618291	0.886361	0.228917	10	1	11	1	0.0804843		0.144657	0.138454		0.707057	0.707057	11.2		0.025758	0.0239216	0.0190987	0.0382904	0.0219775	0.0207896	0.0537012	0.116932	0.22904	0.216157	0.0677809	0	0	0	0	0	1
20054	HAUS1	HGNC:25174	ENSG00000152240	ENSGALG00000040397	ENSACAG00000012652	ENSNSUG00000007270	Avian	0	784.94	0		-0.283471	-0.249655						0.172355	0.611279	0.157772			0.62758	0.62758	20.9	39.7964	0.0406319	0.0305865	0.0463765	0.0381618	0.0329134	0.0310435	0.0291398	0.139945	0.360071	0.23744	0.0985848	0	0	0	0	0	0
20055	ATP5F1A	HGNC:823	ENSG00000152234	ENSGALG00000037880	ENSACAG00000012698	ENSNSUG00000007272	Avian	392.7	784.94	0.500293	0.235	0.635761	-0.0213091	0.00259375					0.0222624		0.0253942	0.382446		0.639945	0.639945	288.8	743.936	0.0199122	0.0175025	0.0202253	0.0108265	0.0153863	0.0237448	0.0210131	0.0108739	0.025343	0.390659	0.0625416	0	0	0	0	0	0
20056	PSTPIP2	HGNC:9581	ENSG00000152229	ENSGALG00000040136	ENSACAG00000012789	ENSNSUG00000009697	Avian	0	784.94	0	0.08	0.461399	-0.0106557	0.0943684					0.127934	0.174048	0.155452	0.0939846		0.56389		0.6	0.362814	0.00585681	0.0278081	0.016633	0.0720041	0.013469	0.0207329	0.0218013	0.00566908	0.0122976	0.112144		0	0	0	1	0	0
20057	EPG5	HGNC:29331	ENSG00000152223	ENSGALG00000036259	ENSACAG00000012846	ENSNSUG00000007273	Avian	0	784.94	0		0.987628	1.3866	0.128314	1	1	2	1	0.194866	0.122207		0.474671		0.476375	0.476375		6.01308	0.0268379	0.0209211	0.0310742	0.0347496	0.0239402	0.0240908	0.02623	0.0489341	0.0604492	0.182311	0.126079	0	0	0	0	0	0
20058	SIGLEC15	HGNC:27596	ENSG00000197046		ENSACAG00000012950	ENSNSUG00000018945	Avian	0	784.94	0	0.14	0.336438	-0.728643	0.012					0.115613	0.0875892	0.0771919						0.0254455	0.0718781	0.0241291	0.0148401	0.0142198	0.0162126	0.00898704	0.0147712					0	0	0	0	0	0
20059	SLC14A1	HGNC:10918	ENSG00000141469	ENSGALG00000032749	ENSACAG00000012956	ENSNSUG00000018943	Avian	0	784.94	0	0.049	-0.0100153	-0.0227271	0.0548462					0.223299	0.259757								0.00152069	0.0311302	0.00128764	0.00477897	0.00122037	0.00203273	0.00247037	0.103673	0.0164551			0	0	0	0	0	0
20060	SETBP1	HGNC:15573	ENSG00000152217	ENSGALG00000036775	ENSACAG00000013045	ENSNSUG00000018942	Avian	108.4	784.94	0.1381	0.649	0.130933	0.473908	0.172033	17	1	15	1	0.0951224	0.166555	0.13322	0.179498		0.407199	0.407199		0.162917	0.00818298	0.0490599	0.0314037	0.0775241	0.0521809	0.0745562	0.0234896	0.0266778	0.0355232	0.180536	0.098405	1	1	0	0	0	0
20061	SYT4	HGNC:11512	ENSG00000132872	ENSGALG00000042626	ENSACAG00000014117	ENSNSUG00000011024	Avian	0	784.94	0	0.247	0.702196	0.943509	0.148292	7	1	2	1	0.0942481	0.066759	0.0603132	0.0711502		0.252235	0.252235		0.11108	0.000359274	0.00028072	0.000640828	0.000171846	5.99046e-05	0.0019575	0.000117122	0.000701572	0.000565303	0.00646048	0.00171888	0	0	0	0	0	0
20062	RIT2	HGNC:10017	ENSG00000152214	ENSGALG00000033353	ENSACAG00000014082	ENSNSUG00000012417	Avian	0	784.94	0	0.888	-0.414038	0.774758	0.132					0.0709912	0.0914173		0.0663049				0.3		0.00135816	0.000236818				0.00139893		0.0837565	0.00947242			0	0	0	0	0	0
20063	PIK3C3	HGNC:8974	ENSG00000078142	ENSGALG00000035773	ENSACAG00000013961	ENSNSUG00000002568	Avian	0	784.94	0	0.627	0.794505	-2.53125	0.0192075					0.0137815	0.0310269	0.0436628	0.515119		0.672237	0.672237	23.4	6.78629	0.0605187	0.0277862	0.0319068	0.0237408	0.0271647	0.0240451	0.0275279	0.0318853	0.0222935	0.204639	0.0634417	0	0	0	0	0	0
20064	CELF4	HGNC:14015	ENSG00000101489	ENSGALG00000002413	ENSACAG00000012428	ENSNSUG00000016047	Avian	0	1064.94	0		0.498147	0.85124	0.31225	13	1	12	1	0.00698216	0.00933333			0.115728	0.541345	0.541345		0.149144	0.00587393	0.0013639	0.00138717	0.00113303	0.000331499	0.00186568	0.000568114	0.00676878		0.364936		0	0	0	0	0	0
20065	KIAA1328	HGNC:29248	ENSG00000150477	ENSGALG00000002419	ENSACAG00000012477	ENSNSUG00000012402	Avian	0	1064.94	0	0.268			0.101	2		2		0.361432	0.551268			0.26765	0.567746	0.567746		2.53011	0.0612854	0.0239526	0.0396113	0.033864	0.0255793	0.0215312	0.0246894	0.171649	0.13547	0.373746	0.105733	0	0	0	0	0	0
20066	TPGS2	HGNC:24561	ENSG00000134779	ENSGALG00000026547	ENSACAG00000012481	ENSNSUG00000013080	Avian	0	1064.94	0				0.0365833					0.3131	0.122395		0.196961		0.384796	0.384796	3.2	10.5143	0.118126	0.0183859	0.0265004	0.0219618	0.0188619	0.0139037	0.0245784	0.0225142	0.0395325	0.207314	0.0360735	0	0	0	0	0	0
20067	AQP7	HGNC:640	ENSG00000165269	ENSGALG00000018534	ENSACAG00000009440	ENSNSUG00000007725	Avian	85	1064.94	0.0798167	0.054	-1.08377	-1.52664	0.02285					0.245015	0.484322		0.189544	0.127806			1	0.0138791	0.027508	0.0015344	0.00304687	0.00617821	0.00253616	0.00418114	0.00287925	0.492504	0.000505572			0	0	0	0	0	1
20068	AQP3	HGNC:636	ENSG00000165272	ENSGALG00000002452	ENSACAG00000012625	ENSNSUG00000013081	Avian	125.9	1064.94	0.118223	0.326	0.446466	-0.423971	0.024					0.0368012	0.0844444		0.207758	0.244708	0.420085	0.420085	262.5	0.142914	0.00117879	0.0106183	0.00261982	0.00294694	0.00110862	0.000866652	0.222938	0.00238032	0.0409621	0.595118	0.0600205	0	0	0	0	0	1
20069	NOL6	HGNC:19910	ENSG00000165271	ENSGALG00000014168	ENSACAG00000000983	ENSNSUG00000008353	Avian	40.9	1064.94	0.0384059	0.205	0.768186	1.15529	0.01815					0.17445	0.253596		0.364393	0.499938	0.670217	0.670217	36.6	66.8493	0.035909	0.0332686	0.0307828	0.0226178	0.0285597	0.019939	0.0443941	0.0408345	0.154338	0.176667	0.0963519	0	0	0	0	0	1
20070	UBE2R2	HGNC:19907	ENSG00000107341	ENSGALG00000001668	ENSACAG00000012852	ENSNSUG00000008786	Avian	350.5	1064.94	0.329127	0.706	0.452543	-1.2628	0.250323	11	1	1					0.217353	0.39279	0.670428	0.670428	13	75.3498	0.0580321	0.0259809	0.0262059	0.0439711	0.0276942	0.0281133	0.0268855	0.203181	0.05035	0.21606	0.069485	0	1	0	0	0	1
20071	UBAP2	HGNC:14185	ENSG00000137073	ENSGALG00000013809	ENSACAG00000012876	ENSNSUG00000005355	Avian	468.84	1064.94	0.44025	0.376	-1.15006	-1.35414	0.0444545					0.260215	0.241009		0.485194	0.260574	0.637663	0.637663	89.4	35.1181	0.0848051	0.02497	0.0271753	0.0279556	0.0242171	0.0211437	0.0312486	0.156127	0.341264	0.231934	0.169892	1	0	0	0	0	1
20072	IFNB1	HGNC:5434	ENSG00000171855	ENSGALG00000005759	ENSACAG00000026778	ENSNSUG00000002128	Avian	0	1064.94	0		-0.0120931	0.404973						0.547737	0.198457	0.762286						0.025215												0	0	0	0	0	0
20073	IFNA1	HGNC:5417	ENSG00000197919	ENSGALG00000013245	ENSACAG00000027003	ENSNSUG00000003213	Avian	0	1064.94	0		-0.400047	0.124759						0.577487	0.184067	0.430541						0.0917282								0.00725024	0.0161062			0	0	0	0	0	0
20074	DCAF12	HGNC:19911	ENSG00000198876	ENSGALG00000005800	ENSACAG00000012964	ENSNSUG00000005358	Avian	513.34	1064.94	0.482037		0.681927	-1.66527	0.21569	2	1	2	1	0.0203968	0.189211	0.0231938	0.261676	0.355133	0.750508	0.750508	23.4	13.137	0.116659	0.0236463	0.0257177	0.0287485	0.0252249	0.0165568	0.0430714	0.103489	0.109602	0.333108	0.259152	0	0	0	1	0	1
20075	UBAP1	HGNC:12461	ENSG00000165006	ENSGALG00000021378	ENSACAG00000013000	ENSNSUG00000002422	Avian	565.6	1064.94	0.53111	0.33	0.833952	-0.138182	0.188889					0.263945	0.2153	0.155359	0.524578	0.55141	0.560643	0.560643	36	17.9638	0.0397219	0.0269205	0.0226673	0.0402916	0.0241141	0.0262119	0.0324931	0.11057	0.305861	0.445917	0.0722787	0	0	0	0	0	1
20076	KIF24	HGNC:19916	ENSG00000186638	ENSGALG00000005806	ENSACAG00000013024	ENSNSUG00000011492	Avian	98.7	1064.94	0.0926813	0.406	-2.62354	-0.370268	0.0133158					0.391773	0.151984		0.0625	0.112436			1.6	5.82434	0.408973	0.0166026	0.0237559	0.00460379	0.023858	0.0155009	0.0291601	0.747842				1	0	0	0	0	1
20077	NUDT2	HGNC:8049	ENSG00000164978	ENSGALG00000027295	ENSACAG00000013079	ENSNSUG00000005388	Avian	85	1064.94	0.0798167	0.085	0.684035	-0.0314362	0.053					0.271287	0.108218	0.107291	0.0625		0.409883	0.409883	43.7	21.7466	0.0210608	0.0276841	0.0296239	0.0281496	0.0211887	0.0239656	0.0215782	0.0427656	0.0963753	0.0841285	0.0987525	0	0	0	0	0	0
20078	LOC427400	CGNC:53072		ENSGALG00000045636		ENSNSUG00000006431	Avian	85	1064.94	0.0798167										0.294601															0.00117877	0.00319956			0	0	0	0	0	0
20079	MYORG	HGNC:19918	ENSG00000164976	ENSGALG00000005814	ENSACAG00000005959	ENSNSUG00000005390	Avian	0	1064.94	0	0.198	-0.299428	-0.959669	0.0750294					0.0331088	0.0221811			0.468763	0.605708	0.605708	1.1	0.564515	0.00502631	0.00920563	0.00418241	0.0347116	0.0102673	0.0410035	0.00891711	0.0124124	0.00748323	0.323173	0.0667465	0	1	0	0	0	0
20080	C9orf24	HGNC:19919	ENSG00000164972		ENSACAG00000005962	ENSNSUG00000005393	Avian	0	1064.94	0	0.133	-0.652285	0.0572153	0.00133333					0.28043		0.00538096	0.39303		0.586942				0.25673	0.0086582	0.0032458	0.000455168	0.00298011	0.0139059	0.00332802			0.232599		0	0	0	0	0	0
20081	FAM219A	HGNC:19920	ENSG00000164970	ENSGALG00000005821	ENSACAG00000005973	ENSNSUG00000005398	Avian	503.8	1064.94	0.473078		0.369272	0.777472	0.0409394	1		5	1	0.00596374	0.0582339	0.0985149	0.271177	0.270783	0.323332		0.5	3.27116	0.0109444	0.0188749	0.0113263	0.033941	0.0213286	0.0139158	0.0118612	0.019032	0.02984	0.0658703		0	0	0	0	0	0
20082	DNAI1	HGNC:2954	ENSG00000122735	ENSGALG00000005831	ENSACAG00000005991	ENSNSUG00000005186	Avian	0	1064.94	0	0.273	1.29379	1.48126	0.0204545					0.119534	0.258339		0.123642	0.113354	0.5573		0.4	2.18294	0.586977	0.00233001	0.00428253	0.000465676	0.00695452	0.00071913	0.00104165	0.661311	0.155073	0.295102		0	0	0	0	0	0
20083	ENHO	HGNC:24838	ENSG00000168913	ENSGALG00000030845		ENSNSUG00000005185	Avian	0	1064.94	0				0.279857								0.0826537				1		0.00671401	0.00281886	0.000194044	0.000206293	0.00016906	0.000462719	0.000555624	0.00229655	0.157477			0	0	0	0	0	0
20084	RPP25L	HGNC:19909	ENSG00000164967	ENSGALG00000038723	ENSACAG00000006073	ENSNSUG00000011467	Avian	39	1064.94	0.0366218		0.208274	0.203099	0.0605					0.0375264	0.0424212		0.413444		0.618991		90		0.0190936	0.0259616	0.0204561	0.0246785	0.0242029	0.0226653	0.0255601	0.0128642	0.0902984	0.259301		0	0	0	0	0	0
20085	DCTN3	HGNC:2713	ENSG00000137100	ENSGALG00000021365		ENSNSUG00000002871	Avian	125.9	1064.94	0.118223	0.077	0.407305	0.102547	0.0261667					0.0670886	0.208752		0.494742	0.646936	0.549209	0.549209	128.6	120.658	0.0162862	0.0271681	0.0238372	0.0209389	0.0222791	0.0234475	0.026711	0.0201753	0.0401586	0.182799	0.375091	0	0	0	0	0	1
20086	ARID3C	HGNC:21209	ENSG00000205143	ENSGALG00000005839	ENSACAG00000022472	ENSNSUG00000006915	Avian	40.9	1064.94	0.0384059	0.288	0.410616	0.100648						0.164653	0.109074			0.189207				20.4223	0.0348752	0.0109658	0.0141475	0.013437	0.00871037	0.0031992	0.00940666	0.0373378	0.00703233			0	0	0	0	0	1
20087	SIGMAR1	HGNC:8157	ENSG00000147955	ENSGALG00000028996	ENSACAG00000006081	ENSNSUG00000001396	Avian	0	1064.94	0		0.196223	-0.0607348	0.0945					0.0758416	0.0657042	0.066067	0.24697		0.782737	0.782737	26	74.1678	0.0173426	0.0315733	0.0279125	0.0272291	0.0310201	0.0271015	0.0297459	0.0223585	0.0605776	0.207917	0.0596363	0	0	0	1	0	0
20088	GALT	HGNC:4135	ENSG00000213930	ENSGALG00000026195	ENSACAG00000006105	ENSNSUG00000001388	Avian	0	1064.94	0	0.095	-2.62354	-0.256425	0.0476					0.10089	0.0523392		0.474634		0.682146	0.682146	8	10.672	0.0091072	0.0224988	0.0259279	0.0365923	0.0238563	0.0199966	0.0189251	0.00908682	0.0121337	0.291309	0.0727436	0	0	0	0	0	0
20089	CNTFR	HGNC:2170	ENSG00000122756	ENSGALG00000028140	ENSACAG00000014122	ENSNSUG00000001320	Avian	0	1064.94	0	0.378	-0.14809	0.786402	0.302917	1	1			0.060751	0.0425276		0.269724		0.454443	0.454443	0.6	0.673713	0.00913906	0.00613623	0.00285218	0.0626022	0.00193932	0.00561462	0.00680228	0.0153395	0.00252648	0.102471	0.126794	0	0	0	0	0	0
20090	IL11RA	HGNC:5967	ENSG00000137070	ENSGALG00000005848	ENSACAG00000007445	ENSNSUG00000000913	Avian	0	1064.94	0	0.363	0.877863	0.464251						0.224329	0.165444		0.408645	0.343514	0.727685		1.2	3.21073	0.0167364	0.0201491	0.0300355	0.196712	0.0307891	0.0407624	0.0201828	0.0080189	0.0275935	0.211954		0	1	0	0	0	0
20091	CCL19	HGNC:10617	ENSG00000172724	ENSGALG00000028256		ENSNSUG00000013261	Avian	0	1064.94	0	0.037	0.355959	0.386229	0.0925					0.482484			0.128057					0.103503	0.000190396	0.0254418	1.05676e-05		0.000108211	7.51505e-06	2.39844e-05		0.00256083			0	0	0	0	0	0
20092	CCL21	HGNC:10620	ENSG00000137077	ENSGALG00000046192		ENSNSUG00000013541	Avian	0	1064.94	0	0.04	-0.102275	0.437754	0.0526667					0.37652			0.1219						0.00227372	0.00856325	0.0245809	0.0829473	0.0448063	0.0266429	0.00860515					0	0	0	0	0	0
20093	PHF24	HGNC:29180	ENSG00000122733	ENSGALG00000001900	ENSACAG00000016949	ENSNSUG00000011774	Avian	0	1064.94	0		0.707907	1.01033						0.10414	0.0887691	0.00376838	0.0625	0.11285	0.253317	0.253317		1.73221	0.0785104	0.000744742	0.00050456	0.00378581	0.00322153	0.00199023	0.00106796	0.00516998		0.0102652		0	0	0	0	0	0
20094	DNAJB5	HGNC:14887	ENSG00000137094	ENSGALG00000001918	ENSACAG00000014160	ENSNSUG00000011773	Avian	247	1064.94	0.231938	0.682			0.233174	2	1			0.011323	0.0482345	0.037686	0.290363	0.29946	0.66743	0.66743	0.4	1.06028	0.0205489	0.0936483	0.00790591	0.0841205	0.084086	0.0637604	0.0122111	0.0118281	0.031164	0.374571	0.103633	0	0	0	0	0	0
20095	VCP	HGNC:12666	ENSG00000165280	ENSGALG00000001986	ENSACAG00000011733	ENSNSUG00000011772	Avian	476.04	1064.94	0.447011		0.507268	-2.17361	0.0593333						0.0609896	0.0027248	0.445095	0.694019	0.811726	0.811726	117.4	267.948	0.0290177	0.035276	0.0206008	0.0166134	0.0286345	0.0232545	0.0340674	0.0195892	0.0895918	0.307986	0.115398	1	0	0	0	0	0
20096	FANCG	HGNC:3588	ENSG00000221829	ENSGALG00000002009	ENSACAG00000029190	ENSNSUG00000011770	Avian	0	1064.94	0		0.736213	-2.261	0.028					0.395354	0.34759	0.333551	0.358933	0.111111	0.525178		4.5	8.3388	0.0614881	0.0187179	0.0291228	0.0191053	0.0206077	0.016085	0.0332172	0.128865	0.193889	0.192017		0	0	0	1	1	0
20097	PIGO	HGNC:23215	ENSG00000165282	ENSGALG00000002023	ENSACAG00000011686	ENSNSUG00000011769	Avian	0	1064.94	0	0.259	0.474566	0.464735	0.0219189					0.178626	0.160489	0.126424	0.0625	0.511671	0.793916	0.793916	11.5	5.51576	0.043335	0.0261888	0.0293174	0.0170456	0.0240758	0.0172648	0.0288912	0.0121914	0.0817863	0.277608	0.277668	0	0	0	0	0	0
20098	STOML2	HGNC:14559	ENSG00000165283	ENSGALG00000002064	ENSACAG00000011614	ENSNSUG00000011768	Avian	0	1064.94	0	0.821	1.43245	-0.109777	0.0006					0.0701974	0.0236109	0.0688697	0.655629	0.628166	0.565864	0.565864	516.3	253.956	0.023191	0.0262508	0.028188	0.0178773	0.0272326	0.0302561	0.0283712	0.021738	0.164788	0.15899	0.135454	0	0	0	0	0	0
20099	FAM214B	HGNC:25666	ENSG00000005238	ENSGALG00000002069	ENSACAG00000011538	ENSNSUG00000011633	Avian	238.6	1064.94	0.22405		0.263794	0.69338	0.2116					0.344353	0.115087	0.103647	0.253783	0.343962	0.530339		9.6	2.61501	0.00965279	0.0238516	0.0105094	0.0271068	0.0202067	0.0220029	0.0228614	0.0460607	0.0464303	0.227075		0	0	0	1	0	0
20100	UNC13B	HGNC:12566	ENSG00000198722	ENSGALG00000002165	ENSACAG00000015635	ENSNSUG00000011628	Avian	0	1064.94	0	0.418	1.59764	1.21541	0.1705	1	1			0.0632479	0.0854626		0.388437	0.314518	0.456564	0.456564	3.3	9.99526	0.0258988	0.0496616	0.0118584	0.0208455	0.0194004	0.0188623	0.0233982	0.0332799	0.0504796	0.0445336	0.171455	1	0	0	0	0	0
20101	ATP8B4	HGNC:13536	ENSG00000179766	ENSGALG00000002326	ENSACAG00000012886	ENSNSUG00000011579	Avian	0	1064.94	0	0.088	1.32348	0.486142	0.125588					0.16291	0.0687679			0.197496				2.66129	0.0122475	0.0290507	0.0112757	0.189195	0.0231177	0.00735778	0.00760327	0.0438337	0.0208195			0	0	0	0	0	0
20102	RUSC2	HGNC:23625	ENSG00000198853	ENSGALG00000002371	ENSACAG00000013712	ENSNSUG00000011578	Avian	85	1064.94	0.0798167	0.103	0.744967	1.03319	0.299					0.143463	0.144898		0.196501	0.407845	0.316971	0.316971	2.6	0.232615	0.032572	0.027049	0.018363	0.0473698	0.0228291	0.0264469	0.0123669	0.0113249	0.00519147	0.143332	0.106484	0	0	0	1	0	0
20103	LOC100858919	CGNC:64196		ENSGALG00000021355	ENSACAG00000013768	ENSNSUG00000017997	Avian	0	1064.94	0										0.150585			0.198576				0.949295								0.00502187	0.0122341			0	0	0	0	0	0
20104	TESK1	HGNC:11731	ENSG00000107140	ENSGALG00000027658	ENSACAG00000013781	ENSNSUG00000011550	Avian	0	1064.94	0	0.214	0.610413	0.575562	0.00133333					0.0943182	0.0826824	0.0855379	0.42054		0.839881	0.839881	18	4.13949	0.051228	0.034113	0.018559	0.029326	0.0300727	0.0304884	0.0179347	0.00772036	0.0762458	0.297661	0.262863	0	0	0	0	0	0
20105	CD72	HGNC:1696	ENSG00000137101	ENSGALG00000005194	ENSACAG00000026841	ENSNSUG00000020237	Avian	0	1064.94	0	0.447	-0.321783	1.27937	0.059	1	1	1	1	0.60698	0.18858		0.148495	0.288438			3		0.00465631	0.00947725	0.00671167	0.0112649	0.0091034	0.00559996	0.00727159					0	0	0	1	0	0
20106	UTF1	HGNC:12634		ENSGALG00000040221		ENSNSUG00000000978	Avian	0	1064.94	0	0.532								0.139852	0.338326								0.886824		0.30436	0.0632325				0.0107647	0.0824764			0	0	0	0	0	0
20107	TMEM8B	HGNC:21427	ENSG00000137103	ENSGALG00000002386	ENSACAG00000013720	ENSNSUG00000011547	Avian	0	1064.94	0		0.696224	0.30069						0.0381679	0.198933	0.00111528	0.187043	0.147829	0.253697	0.253697	0.4	1.06317	0.03344	0.0348649	0.0394617	0.0390338	0.0266126	0.0272245	0.0177492	0.0242447	0.00824099	0.0124766	0.0605522	0	0	0	0	0	0
20108	TAF1C	HGNC:11534	ENSG00000103168	ENSGALG00000025868	ENSACAG00000025553	ENSNSUG00000011474	Avian	0	1064.94	0	0.227	-2.61929	-0.754972	0.0294					0.266991	0.127222		0.100604		0.675737		9.2	12.299	0.0172837	0.0312088	0.0381597	0.0393915	0.0386566	0.0205531	0.0285493	0.0649517	0.0788136	0.223286		0	0	0	0	0	0
20109	HINT2	HGNC:18344	ENSG00000137133	ENSGALG00000027418	ENSACAG00000003036	ENSNSUG00000011472	Avian	0	1064.94	0	0.087	0.849839	0.127357						0.190952	0.0341121	0.00212988	0.379094				27.8	6.23709	0.0187731	0.0219473	0.0160662	0.012427	0.0178605	0.0209331	0.0169198	0.00550618	0.00738655		0.899713	0	0	0	0	0	0
20110	SPAG8	HGNC:14105	ENSG00000137098			ENSNSUG00000011773	Avian	0	1064.94	0	0.12	0.213439	0.0251361						0.591101			0.177996		0.387567			0.172485	0.22676	0.0156187	0.0290996	0.00858134	0.0234755	0.0243104	0.00930702			0.025967		0	0	0	0	0	0
20111	NPR2	HGNC:7944	ENSG00000159899	ENSGALG00000027630		ENSNSUG00000010088	Avian	0	1064.94	0	0.161	-2.62354	-1.04407	0.0486667					0.0188679	0.0422749		0.447596		0.388136	0.388136		4.4801	0.0206438	0.0268527	0.018853	0.0209252	0.0470975	0.0389836	0.0254535	0.00751776	0.0305805	0.0588138	0.242585	0	0	0	0	0	0
20112	MSMP	HGNC:29663	ENSG00000215183	ENSGALG00000028118	ENSACAG00000022796	ENSNSUG00000013858	Avian	0	1064.94	0		0.630606	0.567737	0.277667	1				0.124285	0.0249797						2.2		0.0412409								0.00914865			0	0	0	0	0	0
20113	RGP1	HGNC:21965	ENSG00000107185	ENSGALG00000002394		ENSNSUG00000010081	Avian	0	1064.94	0	0.16	0.70918	0.664042	0.105279	2		1		0.0332901	0.14597			0.528963	0.676133	0.676133	3.6	13.6968	0.0261375	0.0226083	0.0232934	0.0414396	0.0258505	0.0274951	0.0171041	0.035578	0.103615	0.18832	0.0676321	0	0	0	0	0	0
20114	GBA2	HGNC:18986	ENSG00000070610	ENSGALG00000002412	ENSACAG00000011497	ENSNSUG00000010066	Avian	0	1064.94	0	0.098	0.79581	1.11835	0.266833	6	1			0.182927	0.0890966	0.00275407		0.25315	0.467824	0.467824	4.5	34.4668	0.0141117	0.0266338	0.0171461	0.0334378	0.0227753	0.0273338	0.0187733	0.0242712	0.0863587	0.0263746	0.0725301	0	0	0	1	0	0
20115	LOC769899	CGNC:55625		ENSGALG00000023622		ENSNSUG00000006595	Avian	40.9	1064.94	0.0384059										0.29797			0.117402				2.44946								0.012452	0.0176124			0	0	0	0	0	0
20116	AVR2	CGNC:49285		ENSGALG00000028039		ENSNSUG00000002048	Avian	0	1064.94	0										0.347862							0.033439												0	0	0	0	0	0
20117	CREB3	HGNC:2347	ENSG00000107175	ENSGALG00000002523	ENSACAG00000011429	ENSNSUG00000010064	Avian	0	1064.94	0	0.176	0.757229	0.208786	0.0375					0.385544	0.236331			0.499731	0.470761		61	24.2184	0.0355146	0.0512025	0.0207777	0.03653	0.0304189	0.0299394	0.0151986	0.0195468	0.0721674	0.0806866		0	0	0	0	0	0
20118	TLN1	HGNC:11845	ENSG00000137076	ENSGALG00000002548	ENSACAG00000010939	ENSNSUG00000000450	Avian	0	1064.94	0	0.273	1.37211	1.11796	0.177879					0.015188	0.0235386	0.0208963	0.210576	0.404812	0.803591	0.803591	1.6	31.5095	0.00833981	0.0454256	0.0224771	0.0601792	0.0576205	0.065312	0.0183278	0.00799754	0.0338502	0.311104	0.117711	0	1	0	1	0	0
20119	TPM2	HGNC:12011	ENSG00000198467	ENSGALG00000025842	ENSACAG00000010881	ENSNSUG00000008511	Avian	0	1064.94	0	0.772	-1.06096	0.0348921	0.0391	3	1	2	1	0.00353274	0.0464039	0.0411885	0.280263				194.2	84.8544	0.00150588	0.0830614	0.00927539	0.0378799	0.0611385	0.0927738	0.00799669	0.0070897	0.0414153		0.150621	0	0	0	1	0	0
20120	APH1A	HGNC:29509	ENSG00000117362	ENSGALG00000002578		ENSNSUG00000000348	Avian	0	1064.94	0	0.081	0.32539	0.051063	0.144125	1	1			0.0181269	0.0673544		0.338032	0.535992	0.637851	0.637851	29.9	19.1354	0.0127427	0.0210381	0.0349348	0.0396794	0.0202117	0.0142818	0.0354196	0.0434406	0.0242547	0.239622	0.0749143	0	0	0	0	0	0
20121	CA9	HGNC:1383	ENSG00000107159	ENSGALG00000021340	ENSACAG00000009514	ENSNSUG00000000336	Avian	0	1064.94	0	0.333	0.439226	0.854011	0.0703333					0.35186	0.228553	0.00329788		0.49352	0.261075	0.261075	0.3	30.9867	0.0229189	0.00317556	0.000674912	0.00206637	0.00164347	0.00208669	0.000665069	0.0121259	0.0741315	0.021646	0.0925486	0	0	0	0	0	0
20122	ARHGEF39	HGNC:25909	ENSG00000137135	ENSGALG00000002599	ENSACAG00000009488	ENSNSUG00000000324	Avian	0	1064.94	0		-2.62354	0.716999	0.07084					0.159447	0.211525			0.155886			11.7	22.8224	0.038144	0.0278447	0.00900524	0.0785408	0.0336642	0.0411246	0.021603	0.418013	0.659065			0	0	0	0	0	0
20123	MRPL17	HGNC:14053	ENSG00000158042	ENSGALG00000002605	ENSACAG00000009480	ENSNSUG00000004938	Avian	0	1064.94	0	0.086	-0.62704	-0.489051	0.0637647					0.176144	0.0441741		0.46564	0.377911			112.2	159.059	0.0318793	0.0264801	0.0191363	0.0107852	0.0217904	0.0187569	0.0247305	0.0170778	0.0341243			0	0	0	0	0	0
20124	CCBE1	HGNC:29426	ENSG00000183287	ENSGALG00000027785	ENSACAG00000005291	ENSNSUG00000014618	Avian	85	1064.94	0.0798167	0.139	1.08397	0.297883	0.0874595					0.111024	0.101084		0.102583		0.313146	0.313146	0.1	0.531491	0.00594863	0.0260771	0.185326	0.065165	0.035421	0.194319	0.00643491	0.00558229	0.0753947	0.0695909	0.0995387	0	0	0	0	0	0
20125	PDZD2	HGNC:18486	ENSG00000133401	ENSGALG00000002854	ENSACAG00000007750	ENSNSUG00000014620	Avian	0	1064.94	0	0.097			0.151286	3	1	2	1	0.28912	0.0196495	0.275921	0.13865	0.200537	0.423873	0.423873		0.951689	0.0263708	0.00810274	0.031803	0.0266898	0.0130189	0.00737183	0.01778	0.0108189	0.0358139	0.589799	0.0633798	1	0	0	0	0	0
20126	GOLPH3	HGNC:15452	ENSG00000113384	ENSGALG00000028267	ENSACAG00000007801	ENSNSUG00000014621	Avian	645.6	1064.94	0.606231	0.694			0.210769	10	1	4	1	0.0197076	0.0578015	0.112776	0.0625		0.543295	0.543295	24.1	56.8471	0.0141633	0.0464507	0.025081	0.0340929	0.0238828	0.0525934	0.0224369	0.0268119	0.0829199	0.171115	0.160543	0	0	0	0	0	0
20127	MTMR12	HGNC:18191	ENSG00000150712	ENSGALG00000003168	ENSACAG00000007818	ENSNSUG00000014623	Avian	85	1064.94	0.0798167	0.154			0.259615	3	1			0.123384	0.114058	0.181413	0.27547	0.283006	0.741136	0.741136	12.1	3.52567	0.0475268	0.0340406	0.0343074	0.0584906	0.0361045	0.0347191	0.0191507	0.0141586	0.0760887	0.33732	0.0585233	0	0	0	0	0	0
20128	ZFR	HGNC:17277	ENSG00000056097	ENSGALG00000003235	ENSACAG00000007880	ENSNSUG00000014766	Avian	487.04	1064.94	0.45734	0.594	1.08617	0.327317	0.1508	8	1	2		0.0363822	0.0678277	0.0646875	0.422086	0.671421	0.694476	0.694476	35	26.5611	0.0300607	0.0239507	0.0290331	0.0330793	0.0273499	0.0279943	0.0203445	0.0696944	0.0164314	0.163918	0.0867989	0	0	0	0	0	1
20129	SUB1	HGNC:19985	ENSG00000113387	ENSGALG00000003248	ENSACAG00000007974	ENSNSUG00000014768	Avian	608.04	1064.94	0.570962	0.653	0.554611	0.131883	0.176769					0.0418972	0.0506003	0.204245	0.655068	0.316179	0.825245	0.825245	108.9	193.707	0.0270621	0.0231778	0.0191965	0.0228835	0.0225497	0.0192319	0.021449	0.0141362	0.0270735	0.260176	0.646456	0	0	0	1	0	1
20130	NPR3	HGNC:7945	ENSG00000113389	ENSGALG00000017405	ENSACAG00000001580	ENSNSUG00000014776	Avian	0	1064.94	0	0.644	0.773439	0.0473167	0.0844468	2				0.0789474	0.0840203			0.237758	0.290676	0.290676		3.50936	0.0071633	0.0162506	0.00540847	0.0062974	0.0105413	0.0276458	0.0211579	0.0159477	0.00511946	0.0265058	0.00758234	0	0	0	0	0	0
20131	TARS1	HGNC:11572	ENSG00000113407	ENSGALG00000003288		ENSNSUG00000014887	Avian	0	1064.94	0	0.828	-0.363662	0.0299688	0.0408571					0.0391392	0.0457516		0.438811	0.619654	0.642132	0.642132	22.6	142.194	0.0167868	0.0271591	0.0191892	0.0218829	0.0231465	0.0409223	0.0264614	0.0149437	0.0409177	0.18891	0.230818	0	0	0	0	0	0
20132	ADAMTS12	HGNC:14605	ENSG00000151388	ENSGALG00000003295		ENSNSUG00000015015	Avian	85	1064.94	0.0798167	0.091	-0.45448	-0.196565						0.198857			0.0922944	0.38434	0.806214		0.1	1.9446	0.032995	0.0171561	0.0248246	0.0619869	0.0234907	0.021899	0.00793617	0.0436294	0.04909	0.220531		0	0	0	0	1	0
20133	RXFP3	HGNC:24883	ENSG00000182631	ENSGALG00000017411		ENSNSUG00000015019	Avian	0	1064.94	0	0.046	-0.972394	-0.375886	0.0222					0.0760485	0.102379							1.22669	0.0522983							0.0241632	0.202153			0	1	0	0	0	0
20134	SLC45A2	HGNC:16472	ENSG00000164175	ENSGALG00000003310		ENSNSUG00000015031	Avian	0	1064.94	0	0.093	-0.677499	-0.677767	0.0108125					0.201428	0.312482			0.214283	0.460752	0.460752		0.0167458	0.150228	0.0166586	0.00577807	0.00950956	0.0062906	0.00486812	0.0056998	0.0933236		0.542592	0.219134	0	0	0	0	0	0
20135	AMACR	HGNC:451	ENSG00000242110	ENSGALG00000003326		ENSNSUG00000015037	Avian	0	1064.94	0		-1.32705	-0.669264	0.00913043	2	1	1	1	0.265122	0.252035			0.250338	0.287173	0.287173	3.1	17.9637	0.0107345	0.0136274	0.010436	0.00937067	0.0102872	0.0137862	0.0229685	0.0265557	0.00349719	0.870555	0.0314282	1	0	0	0	0	0
20136	C1QTNF3	HGNC:14326	ENSG00000082196	ENSGALG00000027887		ENSNSUG00000004106	Avian	40.9	1064.94	0.0384059		-1.67758	-1.04877	0.0186087					0.102588	0.0269122		0.249204		0.278138			0.192553	0.0963178	0.0117378	0.0142986	0.0259241	0.0112141	0.0207954	0.0122025	0.0465181	0.0025684	0.898835		0	0	0	0	0	1
20137	RAI14	HGNC:14873	ENSG00000039560	ENSGALG00000003353	ENSACAG00000008462	ENSNSUG00000015038	Avian	40.9	1064.94	0.0384059	0.197	0.832403	-0.125876	0.27068	5	1	4	1	0.136328	0.24626	0.186942	0.242675	0.302816	0.336024	0.336024	2.1	2.60503	0.0658514	0.0285428	0.0197779	0.0400549	0.0877864	0.0296965	0.0249018	0.0442302	0.0371937	0.743995	0.026441	0	0	0	0	0	1
20138	TTC23L	HGNC:26355	ENSG00000205838		ENSACAG00000008497	ENSNSUG00000012268	Avian	0	1064.94	0		0.595753	0.111616						0.360131			0.0625				0.2		0.615325	0.00629945	0.0118261		0.00953827	0.00795822	0.0116721					0	0	0	0	0	0
20139	RAD1	HGNC:9806	ENSG00000113456	ENSGALG00000003365	ENSACAG00000008562	ENSNSUG00000015040	Avian	0	1064.94	0	0.347	0.380488	-0.0706877	0.0246579					0.102395	0.0938524	0.0556284	0.260118	0.2947	0.743935	0.743935	23	59.624	0.049006	0.0300247	0.0220848	0.0329759	0.0237593	0.020877	0.0262662	0.00952871	0.0390086	0.248453	0.109848	0	0	0	0	0	0
20140	BRIX1	HGNC:24170	ENSG00000113460	ENSGALG00000003373	ENSACAG00000008586	ENSNSUG00000014788	Avian	0	1064.94	0		0.147409	-1.32792	0.0332174					0.0931639	0.105465		0.418744	0.562874	0.42242	0.42242	236.9	311.082	0.0268411	0.0269497	0.0333007	0.0291577	0.0306378	0.0248069	0.0312614	0.100088	0.170007	0.134446	0.269393	0	0	0	1	0	0
20141	DNAJC21	HGNC:27030	ENSG00000168724	ENSGALG00000003387	ENSACAG00000021095	ENSNSUG00000015041	Avian	0	1064.94	0	0.118	0.20416	-1.25566	0.0322121					0.154063	0.215168	0.100599	0.30995	0.446123	0.69367	0.69367	4.8	23.3342	0.0747951	0.0290367	0.0178848	0.0398428	0.0265245	0.0337675	0.0282577	0.0657722	0.272088	0.152201	0.0595502	0	0	0	0	0	0
20142	AGXT2	HGNC:14412	ENSG00000113492	ENSGALG00000003432	ENSACAG00000008668	ENSNSUG00000015042	Avian	0	1064.94	0	0.144	0.736282	-0.561389	0.0477857					0.165757	0.184549	0.209997	0.110571	0.160553	0.319608	0.319608		2.4488	0.000215933	0.00010081		0.000152469	0.000140093		0.000104255	0.0886559	0.00495573	0.0102222	0.0309631	0	0	0	1	0	0
20143	PRLR	HGNC:9446	ENSG00000113494	ENSGALG00000003446	ENSACAG00000008737	ENSNSUG00000015043	Avian	0	1064.94	0	0.07	0.145756	-0.344868	0.0873833	8	1	1	1	0.445221	0.346204			0.219029	0.364229	0.364229		0.0111095	0.00449084	0.00880212	0.00901242	0.0110367	0.0481954	0.00150139	0.017752		0.018142	0.0775181	0.122404	0	0	0	0	0	0
20144	SPEF2	HGNC:26293	ENSG00000152582	ENSGALG00000023552	ENSACAG00000008901	ENSNSUG00000015097	Avian	0	1064.94	0	0.102	1.36603	1.01714	0.01095					0.288089	0.462324		0.0625	0.126199	0.451643	0.451643	0.3	0.0417798	0.0671034	0.019498	0.036285	0.0134816	0.0357508	0.0122019	0.0202072	0.47812	0.0219015	0.553534	0.658097	0	0	0	1	0	0
20145	IL7R	HGNC:6024	ENSG00000168685	ENSGALG00000013372	ENSACAG00000008906	ENSNSUG00000015133	Avian	0	1064.94	0	0.509	0.203241	0.676458	0.00694444					0.395626	0.309625	0.307535	0.102426	0.169771	0.317851				0.0176453	0.0181168	0.00724486	0.0938938	0.00771215	0.00588186	0.0553241	0.00426261	0.030091	0.199194		0	0	0	1	0	0
20146	CAPSL	HGNC:28375	ENSG00000152611	ENSGALG00000013376	ENSACAG00000028384	ENSNSUG00000015134	Avian	0	1064.94	0	0.084	0.98387	0.845317						0.0473602	0.238189	0.084987	0.16102	0.199206	0.310214	0.310214		0.254845	0.246043	0.00180135			0.000825752	0.000950075			0.0033285	0.0841521	0.905404	0	0	0	0	0	0
20147	LMBRD2	HGNC:25287	ENSG00000164187	ENSGALG00000013377	ENSACAG00000009051	ENSNSUG00000015135	Avian	0	1064.94	0	0.141	1.35105	1.50801	0.100077					0.0571251	0.0428104	0.0778023	0.389275	0.516529	0.39754	0.39754	1.4	8.80788	0.017448	0.0155648	0.0130277	0.0209557	0.0145728	0.0190414	0.0195557	0.0205926	0.010702	0.134307	0.0550076	0	1	0	0	0	0
20148	SKP2	HGNC:10901	ENSG00000145604	ENSGALG00000003547	ENSACAG00000009107	ENSNSUG00000015136	Avian	0	1064.94	0	0.83	1.32512	1.12867	0.0857222					0.15836	0.210547	0.243095	0.222081	0.419044	0.775208	0.775208	25.7	38.7671	0.0174399	0.0203012	0.0269688	0.0336608	0.0278252	0.0203035	0.0351007	0.030831	0.0708096	0.154054	0.174217	0	0	0	0	0	0
20149	NADK2	HGNC:26404	ENSG00000152620	ENSGALG00000003558	ENSACAG00000009164	ENSNSUG00000015137	Avian	40.9	1064.94	0.0384059		1.32971	0.798891	0.0656957					0.0711679	0.0640831	0.198734	0.327652	0.210802	0.414652	0.414652	1.3	21.2893	0.03952	0.0256651	0.0185652	0.0306388	0.0137624	0.026047	0.0135406	0.00364305	0.0673062	0.133145	0.0568519	0	0	0	0	0	1
20150	RANBP3L	HGNC:26353	ENSG00000164188	ENSGALG00000021304	ENSACAG00000009233	ENSNSUG00000017385	Avian	40.9	1064.94	0.0384059	0.138	1.4176	-0.491303	0.00775					0.383869	0.353593		0.201469	0.152098	0.307785			0.0681173	0.0126856	0.044407	0.00620992	0.0264172	0.00371157	0.00472811	0.00250049	0.00837764		0.0777097		0	0	0	0	0	1
20151	SLC1A3	HGNC:10941	ENSG00000079215	ENSGALG00000003582	ENSACAG00000009253	ENSNSUG00000015143	Avian	125.9	1064.94	0.118223	0.24	1.38257	0.556032	0.0442857					0.0299836	0.0636605	0.0501782	0.0821829	0.111217	0.251364	0.251364	0.2	3.50532	0.000473218	0.00121955	0.00709077	0.00112596	0.00129536	0.00155487	0.00289208	0.00377281	0.000559396	0.00466104	0.000262715	0	0	0	0	0	1
20152	NIPBL	HGNC:28862	ENSG00000164190	ENSGALG00000003605	ENSACAG00000009312	ENSNSUG00000015145	Avian	888.04	1064.94	0.833887	0.905	0.370664	-0.289172	0.341842	34	1	32	1	0.0441826	0.110416	0.0525366	0.404074	0.434234	0.866163	0.866163	8.2	16.5408	0.0382622	0.0289777	0.0307067	0.0408641	0.0265546	0.0260867	0.0250164	0.0558396	0.0270838	0.288267	0.129439	1	0	1	1	0	1
20153	CPLANE1	HGNC:25801	ENSG00000197603	ENSGALG00000003631	ENSACAG00000024019	ENSNSUG00000016432	Avian	125.9	1064.94	0.118223	0.097	1.40509	-1.12079	0.0165789					0.366933	0.0307274		0.374148	0.11267	0.320774	0.320774		8.62886	0.0439362	0.0300419	0.0333448	0.0345565	0.0304659	0.0296027	0.0194295	0.160257	0.0814198	0.0945423	0.723411	1	0	0	0	0	1
20154	NUP155	HGNC:8063	ENSG00000113569	ENSGALG00000003688	ENSACAG00000024819	ENSNSUG00000015920	Avian	0	1064.94	0	0.939	1.35449	-2.53125	0.0500682					0.0497321	0.0628799		0.236271	0.587002	0.701748	0.701748	25.4	111.67	0.298411	0.0200037	0.0302846	0.0319885	0.02771	0.0248715	0.0359144	0.0157636	0.02398	0.288922	0.115319	0	1	0	1	0	0
20155	WDR70	HGNC:25495	ENSG00000082068	ENSGALG00000003708	ENSACAG00000009770	ENSNSUG00000016469	Avian	0	1064.94	0	0.203	-0.864314	-2.53125	0.0186216					0.0952697	0.116791	0.153933	0.451907	0.562598	0.788115	0.788115	25.3	48.8054	0.0433413	0.0270747	0.0319345	0.0420571	0.0328098	0.0389554	0.0305736	0.055222	0.0488064	0.235436	0.109206	0	0	0	0	0	0
20156	GDNF	HGNC:4232	ENSG00000168621	ENSGALG00000003716	ENSACAG00000009822	ENSNSUG00000016677	Avian	85	1064.94	0.0798167	0.675	0.147158	-0.12323	0.219071	13	1	12	1	0.194925	0.310435	0.270799			0.534404	0.534404		0.520628	0.0194237	0.0310137	0.0591404	0.152797	0.0241212	0.0987792	0.0089578	0.0244021	0.00386707	0.30904	0.110007	0	0	1	0	1	0
20157	EGFLAM	HGNC:26810	ENSG00000164318	ENSGALG00000003726	ENSACAG00000021140	ENSNSUG00000016679	Avian	40.9	1064.94	0.0384059	0.177	0.669729	-0.457063	0.037	1	1			0.110656	0.0812214	0.158324	0.352067	0.308064			6	14.4104	0.0537967	0.0358162	0.0658342	0.0717797	0.00980525	0.00798788	0.0130393	0.0532612	0.0990529		0.0213855	0	0	0	1	0	1
20158	LIFR	HGNC:6597	ENSG00000113594	ENSGALG00000003733	ENSACAG00000009842	ENSNSUG00000016680	Avian	40.9	1064.94	0.0384059	0.617	1.11521	-0.187146	0.224818	9	1			0.195369	0.396182	0.296102	0.19781	0.488235	0.598546	0.598546	3.9	6.05177	0.0139604	0.0419616	0.0252966	0.236943	0.0455092	0.0121557	0.0124168	0.0759041	0.0240429	0.126662	0.126487	0	1	0	0	0	1
20159	OSMR	HGNC:8507	ENSG00000145623	ENSGALG00000003747	ENSACAG00000009942	ENSNSUG00000018861	Avian	0	1064.94	0	0.139	1.21325	1.00937	0.148792					0.51919	0.563		0.35755	0.196747			0.9	0.227997	0.0032434	0.0365388	0.0289764	0.0297895	0.031607	0.0253904	0.0188462	0.0152107	0.0347185			0	0	0	0	0	0
20160	RICTOR	HGNC:28611	ENSG00000164327	ENSGALG00000003775	ENSACAG00000009960	ENSNSUG00000016683	Avian	168	1064.94	0.157755		1.14273	1.09562	0.274595	26	1	17	1	0.0429799	0.0709695	0.0766376	0.155737	0.400555	0.302998	0.302998	0.8	10.5851	0.0286333	0.0218379	0.0286108	0.0821055	0.0307722	0.0264826	0.0209982	0.0262871	0.0310115	0.0523925	0.0939621	1	0	0	0	0	0
20161	FYB1	HGNC:4036	ENSG00000082074	ENSGALG00000003792	ENSACAG00000026231	ENSNSUG00000016685	Avian	0	1064.94	0	0.065	0.183366	1.0232	0.0223333					0.21775	0.351579	0.238459	0.0803021	0.149992	0.360797	0.360797	0.1	0.0932601	0.0086039	0.0112573	0.00623136	0.038994	0.00839393	0.0074969	0.0137364	0.0612347	0.0332509	0.107322	0.122239	0	0	0	0	0	0
20162	C9	HGNC:1358	ENSG00000113600		ENSACAG00000010148	ENSNSUG00000016686	Avian	0	1064.94	0	0.12	0.935405	0.772789	0.01925					0.349225		0.313948	0.0625		0.25074	0.25074			0.000503133	3.20029e-05	3.9267e-05	4.42467e-05	3.69101e-05	2.95589e-05	3.95397e-05				0.000194976	0	0	0	0	0	0
20163	DAB2	HGNC:2662	ENSG00000153071	ENSGALG00000003803	ENSACAG00000010173	ENSNSUG00000016687	Avian	85	1064.94	0.0798167	0.279	0.931322	1.15583	0.1522					0.260903	0.451329		0.317461	0.163778	0.469725	0.469725	37.6	2.09064	0.00451799	0.0184445	0.0219338	0.0243281	0.0199502	0.0158894	0.0131483	0.00808504	0.571739	0.1228	0.134711	0	0	0	0	0	0
20164	PTGER4	HGNC:9596	ENSG00000171522	ENSGALG00000014824	ENSACAG00000010213	ENSNSUG00000016689	Avian	40.9	1064.94	0.0384059	0.119	0.328167	0.257094	0.113059	5	1	2	1	0.0786352	0.101914			0.272985	0.680566	0.680566		1.68145	0.0203612	0.0109693	0.00225791	0.0749186	0.00758016	0.0506967	0.00887028	0.107524	0.00714838	0.284883	0.0487515	0	0	0	0	0	0
20165	TTC33	HGNC:29959	ENSG00000113638	ENSGALG00000014826	ENSACAG00000010230	ENSNSUG00000016691	Avian	0	1064.94	0	0.143	0.543249	-0.150036	0.0671111					0.123932	0.232461	0.160431	0.283523	0.337732	0.561062	0.561062	3.4	24.7177	0.0358418	0.0241501	0.0294852	0.0405481	0.0274178	0.0276631	0.0176432	0.0745271	0.0837194	0.265814	0.0875098	0	0	0	0	0	0
20166	PRKAA1	HGNC:9376	ENSG00000132356	ENSGALG00000014832	ENSACAG00000010236	ENSNSUG00000016695	Avian	451.94	1064.94	0.424381	0.88	0.799774	-0.636957	0.171963	3	1	5	1	0.0116684	0.0293832	0.0472484	0.128239	0.533347	0.692124	0.692124	12	26.2747	0.0540674	0.0295089	0.0249933	0.0572235	0.0350183	0.0259323	0.022474	0.0836726	0.147645	0.361207	0.0732124	0	0	0	0	0	1
20167	RPL37	HGNC:10347	ENSG00000145592	ENSGALG00000014833	ENSACAG00000010291	ENSNSUG00000016784	Avian	565.94	1064.94	0.531429	0.614	1.0478	-2.103	0.0299574	1	1					0.034713	0.371436	0.534842	0.603401	0.603401	625.9	2132.54	0.0120927	0.0308667	0.0715815	0.052988	0.0249972	0.0238812	0.0308018	0.0339907	0.0202308	0.316347	0.88341	0	0	0	0	0	1
20168	C7	HGNC:1346	ENSG00000112936	ENSGALG00000014835	ENSACAG00000010303	ENSNSUG00000016786	Avian	0	1064.94	0	0.377	-0.210288	0.388772	0.0584118					0.273132	0.268334	0.217195	0.259973	0.28481	0.485264	0.485264		0.38016	0.00584661	0.0259543	0.173539	0.238689	0.019142	0.014279	0.00156529	0.0138013	0.00872498	0.515183	0.0704633	0	0	0	0	0	0
20169	C6	HGNC:1339	ENSG00000039537	ENSGALG00000014840	ENSACAG00000022087	ENSNSUG00000016788	Avian	85	1064.94	0.0798167	0.053	-0.54551	-1.13296	0.0298095					0.291336	0.247324	0.284154	0.0889252	0.111805	0.251066	0.251066		0.0115323	0.00514888	0.000832796	0.0222171	0.00111235	0.000676374	0.00104159	0.000246726	0.00477267	0.000462191	0.0001437	0.0106812	0	0	0	1	0	0
20170	PLCXD3	HGNC:31822	ENSG00000182836	ENSGALG00000014845	ENSACAG00000010454	ENSNSUG00000017058	Avian	0	1064.94	0	0.276	0.25962	-0.084415	0.199733	6	1			0.0191903	0.0847364	0.121747		0.21824	0.253045	0.253045		0.346953	0.00164487	0.0036213	0.107745	0.049751	0.00802176	0.00269969	0.00343677	0.173601	0.0119734	0.012034	0.000571274	0	0	0	0	0	0
20171	OXCT1	HGNC:8527	ENSG00000083720	ENSGALG00000014846	ENSACAG00000010461	ENSNSUG00000017062	Avian	0	1064.94	0	0.084	0.696295	0.700704	0.0736154					0.0695114	0.0449474	0.085708	0.153078	0.594481	0.624366	0.624366	5.3	10.187	0.0172295	0.024956	0.0138059	0.0256616	0.0213823	0.020616	0.0182743	0.0316727	0.0158923	0.39099	0.0471555	0	0	0	0	0	0
20172	C5orf51	HGNC:27750	ENSG00000205765	ENSGALG00000033098	ENSACAG00000010599	ENSNSUG00000017065	Avian	0	1064.94	0		0.510638	0.11828	0.0827778					0.115076	0.464109	0.242652	0.350061		0.579974	0.579974	5.9		0.0195106	0.030296	0.0250481	0.0340651	0.0271195	0.0247149	0.020726	0.0304938	0.170829	0.431054	0.272396	0	0	0	1	0	0
20173	FBXO4	HGNC:13583	ENSG00000151876	ENSGALG00000014851	ENSACAG00000010612	ENSNSUG00000017066	Avian	0	1064.94	0	0.092	-1.16788	0.402843	0.016					0.120466	0.207931	0.285475	0.303159	0.30676	0.49189	0.49189	1.1	3.21686	0.032606	0.0292895	0.0302523	0.0306713	0.0248636	0.0192627	0.0269452	0.0623783	0.0493597	0.508244	0.154328	0	0	0	0	0	0
20174	GHR	HGNC:4263	ENSG00000112964	ENSGALG00000014855	ENSACAG00000010633	ENSNSUG00000017068	Avian	85	1064.94	0.0798167	0.408			0.151651	10	1	6	1	0.488028	0.340993	0.255955	0.136602	0.150378	0.414307	0.414307		5.22566	0.00285034	0.0179021	0.0135777	0.0267062	0.0100836	0.0160742	0.0146879	0.0017995	0.00412007	0.603417	0.0639294	0	0	0	0	1	0
20175	CCDC152	HGNC:34438	ENSG00000198865	ENSGALG00000023503	ENSACAG00000010689	ENSNSUG00000019971	Avian	0	1064.94	0				0.0444444	2	1	2	1	0.24722	0.339973			0.111111	0.336026	0.336026	0.6		0.0472748	0.0109126	0.0293754	0.0255945	0.00935487	0.00799104	0.011607	0.532525	0.00264231	0.107168	0.189563	0	0	0	1	0	0
20176	SELENOP	HGNC:10751	ENSG00000250722	ENSGALG00000014857	ENSACAG00000026650	ENSNSUG00000017068	Avian	85	1064.94	0.0798167	0.18	0.396662	-0.278606	0.0125			1			0.456047		0.211854	0.207325	0.586395	0.586395	0.5	2.59361	0.00259603	0.0103507	0.0317784	0.0321053	0.0101351	0.0064162	0.0168911	0.0101214	0.00411988	0.294802	0.0175686	0	0	0	0	0	0
20177	ZNF131	HGNC:12915	ENSG00000172262	ENSGALG00000014859	ENSACAG00000010702	ENSNSUG00000017072	Avian	567.04	1064.94	0.532462	0.234	0.475454	0.766029	0.304111	5	1	7	1	0.0920737	0.102904		0.257784	0.282081	0.839174	0.839174	19.2	18.1673	0.0737787	0.0230568	0.032728	0.0716847	0.0291532	0.0199478	0.0313185	0.0763221	0.043495	0.256935	0.146784	0	0	0	1	0	0
20178	NIM1K	HGNC:28646	ENSG00000177453	ENSGALG00000014861	ENSACAG00000010721	ENSNSUG00000017073	Avian	0	1064.94	0		0.512338	-0.192157						0.0702124	0.193247	0.160931		0.116665			0.1	0.163323	0.00700407	0.00674012	0.00189854	0.0175035	0.00338258	0.00974573	0.00475266	0.0108256	0.0124174		0.0218456	0	0	0	0	0	0
20179	HMGCS1	HGNC:5007	ENSG00000112972	ENSGALG00000014862	ENSACAG00000010737	ENSNSUG00000017074	Avian	212.24	1064.94	0.199298	0.33	0.846229	0.374202	0.224964	1				0.0664198	0.0457586	0.0724788	0.261693	0.15843	0.447815	0.447815	4.4	46.8163	0.00949064	0.0109059	0.0107706	0.00861356	0.00904316	0.00832371	0.0767087	0.00286413	0.0151521	0.157588	0.0437603	0	0	0	0	0	0
20180	TMEM267	HGNC:26139	ENSG00000151881	ENSGALG00000014863	ENSACAG00000010797	ENSNSUG00000017081	Avian	0	1064.94	0	0.543	0.567045	0.113741	0.00570588					0.214815	0.112178		0.425533	0.111111	0.545168	0.545168	9	15.0205	0.0231222	0.0262077	0.0274803	0.0188815	0.0312186	0.0219997	0.0300126	0.00373042	0.0110548	0.289868	0.103858	0	0	0	0	0	0
20181	C5orf34	HGNC:24738	ENSG00000172244	ENSGALG00000014865	ENSACAG00000010801	ENSNSUG00000017084	Avian	0	1064.94	0	0.185	0.941608	-0.108578	0.024					0.236777	0.303779	0.370888					11.9	4.21437	0.113994	0.0475281	0.0276562	0.0464595	0.029064	0.0239504	0.0333526	0.0172146	0.0529202			0	0	0	0	0	0
20182	PAIP1	HGNC:16945	ENSG00000172239	ENSGALG00000014867	ENSACAG00000010867	ENSNSUG00000017086	Avian	245.04	1064.94	0.230097	0.509	1.00302	0.201488	0.296833	4	1	3	1	0.0293946	0.114989	0.12002	0.543796	0.294941	0.658012	0.658012	16.1	35.3547	0.0472834	0.0304312	0.0235851	0.0379257	0.0286722	0.0299965	0.0201632	0.0135062	0.0324682	0.262306	0.146967	0	1	0	1	0	0
20183	NNT	HGNC:7863	ENSG00000112992	ENSGALG00000014869	ENSACAG00000010913	ENSNSUG00000017091	Avian	0	1064.94	0	0.291	-0.0077021	-0.138023	0.0762258			2	1	0.0565607	0.0789474	0.0726817	0.12093	0.493616	0.751402	0.751402	0.5	45.0081	0.00629821	0.0154809	0.0095054	0.0106232	0.0122922	0.0228832	0.00923085	0.00847596	0.0130389	0.332711	0.0750606	0	0	0	0	0	0
20184	FGF10	HGNC:3666	ENSG00000070193	ENSGALG00000014872		ENSNSUG00000017340	Avian	0	1064.94	0	0.562	0.610144	0.880893	0.156919	11	1	8	1	0.0896194	0.0145889			0.290104	0.469666	0.469666		0.269629	0.00334099	0.0522467	0.060526	0.194073	0.0123156	0.0606893	0.0685915	0.00440743	0.243813	0.35837	0.0947718	0	0	0	0	1	0
20185	MRPS30	HGNC:8769	ENSG00000112996	ENSGALG00000014874	ENSACAG00000011165	ENSNSUG00000017341	Avian	0	1064.94	0	0.277	-1.29749	0.403987	0.0138125					0.352719	0.189243	0.210789	0.40754	0.695703	0.830965	0.830965	91.7	48.1879	0.0352214	0.0206035	0.0199603	0.0328236	0.0212425	0.0249389	0.0212825	0.0236338	0.0930705	0.300855	0.124081	0	0	0	1	0	0
20186	HCN1	HGNC:4845	ENSG00000164588	ENSGALG00000014875	ENSACAG00000011205	ENSNSUG00000017344	Avian	0	1064.94	0	0.502	0.666629	-1.49544	0.255064	14	1	9	1	0.0327968	0.0421245	0.0973295		0.121856	0.287443	0.287443		0.238192	0.00655176	0.00513524	0.00512579	0.00423555	0.0042032	0.00382709	0.00542852	0.00835084		0.0139557	0.0156674	0	0	0	0	0	0
20187	EMB	HGNC:30465	ENSG00000170571	ENSGALG00000014877	ENSACAG00000011296	ENSNSUG00000017348	Avian	0	1064.94	0	0.034			0.0515333					0.391607	0.621415	0.373677	0.130944	0.16606				89.8085	0.0308334	0.0350595	0.00627558	0.00880134	0.00585748	0.010299	0.015967	0.311604	0.608193			0	0	0	0	1	0
20188	PARP8	HGNC:26124	ENSG00000151883	ENSGALG00000014880	ENSACAG00000004471	ENSNSUG00000017358	Avian	85	1064.94	0.0798167	0.287	0.779615	-1.18233	0.213114	9	1	6	1	0.0394577	0.114926	0.0694087	0.144367	0.253007	0.775437	0.775437		17.753	0.0323519	0.0268157	0.0192256	0.0322206	0.0124766	0.0161141	0.0347339	0.114235	0.0467894	0.244406	0.0539385	0	0	0	0	0	0
20189	ISL1	HGNC:6132	ENSG00000016082	ENSGALG00000014884	ENSACAG00000004390	ENSNSUG00000017413	Avian	85	1064.94	0.0798167	0.381	0.0350005	0.893829	0.612909	17	1	12	1		0.00826446	0.00439453		0.111504	0.44276	0.44276	1.6	0.115602	0.0492229	0.28953	0.00103993	0.000817569	0.0030459	0.01282	0.377938	0.121174	0.049136	0.291473	0.00492881	0	0	0	0	0	0
20190	ITGA1	HGNC:6134	ENSG00000213949	ENSGALG00000014891	ENSACAG00000004092	ENSNSUG00000017415	Avian	0	1064.94	0	0.414	0.0161385	0.308585	0.113196					0.106143	0.108726	0.162756	0.279114	0.439639	0.325521	0.325521		29.4	0.00176949	0.0712001	0.00694465	0.0736	0.0417164	0.0973734	0.00521359	0.0142425	0.00598903	0.119454	0.0735941	0	0	0	0	0	0
20191	PELO	HGNC:8829	ENSG00000152684	ENSGALG00000014891	ENSACAG00000004352	ENSNSUG00000017415	Avian	0	1064.94	0	0.298	-0.415403	0.502242	0.0226					0.0222295	0.108726	0.0545145	0.0625	0.439639	0.610457	0.610457	13.4	29.4	0.0196506	0.0342055	0.015761	0.0547275	0.038938	0.0379131	0.0173432	0.0142425	0.00598903	0.185721	0.0883773	0	1	0	0	0	0
20192	ITGA2	HGNC:6137	ENSG00000164171	ENSGALG00000014903	ENSACAG00000003947	ENSNSUG00000017418	Avian	0	1064.94	0	0.251	-1.41263	1.26759	0.104341					0.187658		0.162635		0.131656	0.360934	0.360934		1.23926	0.00217434	0.0260838	0.00522163	0.0109373	0.00877295	0.00610534	0.0641295	0.0813775	0.0497208	0.104382	0.0409997	0	0	0	0	0	0
20193	MOCS2	HGNC:7193	ENSG00000164172	ENSGALG00000014906	ENSACAG00000008027	ENSNSUG00000017421	Avian	125.9	1064.94	0.118223	0.06	0.626807	-0.0570037	0.0224474	3	1			0.21093	0.137051	0.104782	0.480688	0.408255	0.255703	0.255703	9.3	46.5873	0.0137645	0.0263757	0.0171387	0.024555	0.0159918	0.0247334	0.0109916	0.0129646	0.0289537	0.00553782	0.00455314	0	0	0	0	0	1
20194	FST	HGNC:3971	ENSG00000134363	ENSGALG00000014908	ENSACAG00000015537	ENSNSUG00000003988	Avian	206.9	1064.94	0.194283	0.818	0.625638	0.930507	0.2779	17	1	13	1	0.0284103	0.0202723		0.343569	0.24091	0.508813	0.508813	0.1	0.341707	0.0169231	0.0776237	0.0263029	0.0497173	0.0186633	0.0249734	0.0176037	0.005938	0.0991939	0.491339	0.0637788	0	0	0	1	1	1
20195	NDUFS4	HGNC:7711	ENSG00000164258	ENSGALG00000028026	ENSACAG00000015523	ENSNSUG00000001395	Avian	0	1064.94	0	0.333	0.782569	0.645551	0.3035	3	1	3	1	0.19435	0.596865	0.311177	0.382246		0.736131	0.736131	73.2	28.0954	0.0188512	0.0288841	0.0295982	0.0369671	0.0208683	0.0271295	0.0202907	0.0480253	0.0447271	0.301639	0.303837	0	0	0	0	0	0
20196	ARL15	HGNC:25945	ENSG00000185305	ENSGALG00000014911	ENSACAG00000015517	ENSNSUG00000001399	Avian	164.9	1064.94	0.154844	0.547	0.213418	0.574334	0.14881	7	1			0.0346893	0.119502	0.066601		0.469935	0.563804	0.563804	50.4	10.7896	0.0308491	0.0213794	0.0161167	0.0424592	0.0326234	0.0120026	0.026448	0.0167423	0.00871441	0.288628	0.0788781	0	0	0	1	0	0
20197	HSPB3	HGNC:5248	ENSG00000169271	ENSGALG00000014912	ENSACAG00000015513	ENSNSUG00000001399	Avian	0	1064.94	0	0.147	0.777049	0.983871	0.0459655					0.121253	0.29767	0.216393			0.292086	0.292086	0.3	0.241177	0.00182941	0.00489434	0.000935328	0.0278338	0.00819016	0.00171461	0.000514847	0.00240478	0.00122458	0.144089		0	0	0	0	0	0
20198	SNX18	HGNC:19245	ENSG00000178996	ENSGALG00000014914	ENSACAG00000015508	ENSNSUG00000001399	Avian	286.7	1064.94	0.269217	0.222	-0.0540425	0.310593	0.27429	10	1	8	1	0.0737497	0.0170559		0.0625	0.32788	0.732764	0.732764	3.7	21.6375	0.0175774	0.0212336	0.0348518	0.0462636	0.0291082	0.0219333	0.018564	0.0447908	0.0383493	0.218962	0.078444	0	1	0	0	0	0
20199	FREM3	HGNC:25172		ENSGALG00000020561	ENSACAG00000015497	ENSNSUG00000001408	Avian	0	1064.94	0	0.125								0.373582		0.227488		0.481779				2.79961	0.0472873	0.00334403	0.0011704	0.00485491		0.00381783	0.00267632	0.0391888				0	0	0	0	0	0
20200	ESM1	HGNC:3466	ENSG00000164283	ENSGALG00000027707	ENSACAG00000015483	ENSNSUG00000001412	Avian	40.9	1064.94	0.0384059	0.112	0.675549	0.582309	0.165769					0.339542	0.0699082	0.142486	0.0665328		0.303028	0.303028		0.00723042	0.014383	0.0470087	0.0148171	0.00114513	0.00534121	0.00276633	0.00335626	0.020917	0.00717843	0.825007	0.0342094	0	0	0	0	0	0
20201	GZMK	HGNC:4711	ENSG00000113088	ENSGALG00000013546		ENSNSUG00000002364	Avian	0	1064.94	0	0.088	0.0122671	0.846296	0.022125					0.276482			0.15225	0.351174	0.706136	0.706136			0.00726901	0.0187672	0.00618415	0.21227	0.0227166	0.00552282	0.040278	0.0212599	0.00908082	0.0453427	0.0350421	0	0	0	0	0	0
20202	GZMA	HGNC:4708	ENSG00000145649	ENSGALG00000013548	ENSACAG00000015449	ENSNSUG00000002364	Avian	0	1064.94	0	0.093	0.568612	0.865497						0.370409	0.569929		0.103451	0.148144					0.00629737	0.0111347	0.0050922	0.0608153	0.0203384	0.00605395	0.0375598	0.0546561	0.0117237			0	0	0	0	0	0
20203	CDC20B	HGNC:24222	ENSG00000164287	ENSGALG00000046188	ENSACAG00000015417	ENSNSUG00000013541	Avian	85	1064.94	0.0798167	0.128	-0.922579	0.410103	0.0319					0.311707							1	0.0185818	0.903866	0.00631223		0.0294427				0.678062	0.298381			0	0	0	0	0	0
20204	GPX8	HGNC:33100	ENSG00000164294	ENSGALG00000026704	ENSACAG00000015412	ENSNSUG00000001105	Avian	0	1064.94	0		0.426043	0.0401024	0.0601026					0.149195	0.153243	0.161256	0.102041		0.434637	0.434637	0.4	0.792233	0.0156498	0.032656	0.0638925	0.028243	0.0656442	0.0175437	0.0288979	0.0245011	0.0664768	0.575193	0.224393	0	0	0	0	0	0
20205	CCNO	HGNC:18576	ENSG00000152669	ENSGALG00000028595	ENSACAG00000015399	ENSNSUG00000001108	Avian	0	1064.94	0	0.068	0.144752	-0.134027	0.00652					0.102807		0.2263	0.0993957				6.7	3.59716	0.158706	0.0102577	0.0100716	3.28548e-06	0.00310696	0.000605476	0.00912609	0.021847	0.726693			0	0	0	0	0	0
20206	DHX29	HGNC:15815	ENSG00000067248	ENSGALG00000014700	ENSACAG00000015328	ENSNSUG00000001110	Avian	0	1064.94	0	0.588	1.25495	-0.0350779	0.160333					0.0704683	0.147335	0.109126	0.319821	0.506463	0.730153	0.730153	20.7	25.9759	0.0251236	0.0301266	0.0226216	0.034035	0.030068	0.030145	0.029494	0.0309213	0.0272758	0.182213	0.0525578	1	0	0	0	0	0
20207	MTREX	HGNC:18734	ENSG00000039123	ENSGALG00000014709	ENSACAG00000015200	ENSNSUG00000002530	Avian	0	1064.94	0	0.524	0.349892	0.260146	0.0724			1		0.0173683	0.0744729	0.0688046	0.107976	0.458606	0.635487	0.635487	21	104.297	0.0569857	0.0222777	0.0287421	0.0220331	0.0293369	0.0251624	0.0273058	0.017264	0.0300079	0.393399	0.12388	0	0	0	1	0	0
20208	PLPP1	HGNC:9228	ENSG00000067113	ENSGALG00000014711	ENSACAG00000015109	ENSNSUG00000002914	Avian	0	1064.94	0	0.544	0.563765	0.174228	0.351333	3	1	3	1	0.211939	0.119183	0.201292	0.410139	0.254896	0.366801	0.366801	59.1	1339.71								0.00498901	0.052055	0.681569	0.218119	0	0	0	0	0	0
20209	SLC38A9	HGNC:26907	ENSG00000177058	ENSGALG00000014712	ENSACAG00000015025	ENSNSUG00000002915	Avian	0	1064.94	0	0.088	0.358921	-0.761255	0.0849556					0.136642	0.155769	0.126325	0.287044	0.416463	0.860695	0.860695	5.2	12.9482	0.113753	0.0162669	0.0240071	0.0258242	0.0221973	0.0182908	0.0294302	0.00427112	0.0236064	0.290463	0.174956	0	0	0	0	0	0
20210	DDX4	HGNC:18700	ENSG00000152670	ENSGALG00000014713	ENSACAG00000014951	ENSNSUG00000002929	Avian	0	1064.94	0	0.583	0.731566	1.42435	0.0545357					0.105036	0.26289		0.0626581	0.117932	0.263948	0.263948	8.3	2.9843	0.978919	0.000324882	0.0107536	0.0137784	0.0063756	0.0130625	0.00702971	0.747582		0.0304867	0.145013	0	0	0	0	1	0
20211	IL31RA	HGNC:18969	ENSG00000164509	ENSGALG00000030800	ENSACAG00000014938	ENSNSUG00000017772	Avian	0	1064.94	0	0.046	0.472342	1.22555	0.0036					0.601012	0.532612				0.706859				0.163681	0.0917858	0.0311985	0.0115793	0.0152939	0.02499	0.0284324	0.0411336		0.353678		0	0	0	0	0	0
20212	IL6ST	HGNC:6021	ENSG00000134352	ENSGALG00000014716	ENSACAG00000014810	ENSNSUG00000002931	Avian	40.9	1064.94	0.0384059	0.616	1.02678	0.842561	0.142273	6	1	4		0.172522	0.271191	0.25782	0.311613	0.428723	0.66027	0.66027	2.5	25.9941	0.00835	0.0361075	0.0282028	0.0669112	0.0248692	0.0212278	0.0175595	0.0100505	0.0195445	0.171126	0.128835	0	0	0	0	0	0
20213	ANKRD55	HGNC:25681	ENSG00000164512	ENSGALG00000014717	ENSACAG00000014766	ENSNSUG00000003003	Avian	0	1064.94	0	0.092	0.234292	-2.53125	0.0761429					0.153272	0.356863	0.204287	0.076394	0.227674	0.253065	0.253065	6.5		0.3322	0.00331403	0.00940712	0.0107249	0.00371669	0.00411619	0.00632112	0.0517576	0.00144454	0.00486659	0.148964	0	0	0	0	0	0
20214	MAP3K1	HGNC:6848	ENSG00000095015	ENSGALG00000014718	ENSACAG00000014703	ENSNSUG00000003026	Avian	85	1064.94	0.0798167	0.193	0.994575	1.2328	0.395	30	1	27	1	0.0901272	0.111257	0.089731	0.144404	0.252647	0.695828	0.695828	2.5	11.9996	0.0350262	0.0154213	0.0349676	0.0322684	0.0170315	0.00976722	0.0496577	0.0209955	0.0103435	0.359284	0.409338	1	0	0	0	0	0
20215	SETD9	HGNC:28508	ENSG00000155542	ENSGALG00000014719	ENSACAG00000014688	ENSNSUG00000003026	Avian	0	1064.94	0		0.513558	-0.844242	0.197154	8		4			0.14927	0.196353	0.385064	0.198064	0.611523		4.2	28.0169	0.160364	0.0245936	0.0165494	0.0340664	0.0139788	0.0279165	0.0173351	0.217513	0.139159	0.247444		0	0	0	0	0	0
20216	MIER3	HGNC:26678	ENSG00000155545	ENSGALG00000014721	ENSACAG00000028478	ENSNSUG00000003034	Avian	512.9	1064.94	0.481623	0.422	0.959673	-0.50238	0.430643	45	1	40	1	0.0716516		0.049349	0.273286	0.46703	0.599964	0.599964	6.6	3.89713	0.0489322	0.0221183	0.0369613	0.0458852	0.0290953	0.0272942	0.0235331	0.0332312	0.01986	0.226718	0.132526	0	0	0	0	0	1
20217	GPBP1	HGNC:29520	ENSG00000062194	ENSGALG00000014724	ENSACAG00000014605	ENSNSUG00000003139	Avian	286	1064.94	0.26856	0.793	0.815823	-1.95965	0.182	3		7	1	0.106884	0.264706	0.172032	0.534356	0.353047	0.656071	0.656071	70.5	11.6104	0.0581826	0.0239417	0.0354369	0.0332598	0.0222429	0.0205042	0.0211746	0.054306	0.0469448	0.229567	0.0694516	0	0	0	0	0	1
20218	PLK2	HGNC:19699	ENSG00000145632	ENSGALG00000014725	ENSACAG00000009334	ENSNSUG00000003144	Avian	125.9	1064.94	0.118223	0.275	1.07374	0.575908	0.396778	5	1	6	1	0.0327439	0.0430175	0.0462338	0.460973	0.422371	0.696323	0.696323	5.9	2.64069	0.0671844	0.015872	0.0085417	0.0504535	0.00854955	0.00307192	0.0255464	0.010493	0.111744	0.262157	0.091938	0	0	0	0	0	1
20219	RAB3C	HGNC:30269	ENSG00000152932	ENSGALG00000014726		ENSNSUG00000003194	Avian	0	1064.94	0	0.499	0.0150846	0.463311	0.159759	8	1	8	1	0.0223908	0.113699		0.136066	0.133454	0.25		0.2	0.670593	0.00122484	0.000258183	0.00109114	0.00101583	0.00045183	0.00183223	0.000716991	0.0112128	0.00216758			0	0	0	0	0	0
20220	PDE4D	HGNC:8783	ENSG00000113448	ENSGALG00000014727	ENSACAG00000009088	ENSNSUG00000003196	Avian	85	1064.94	0.0798167	0.212	-1.07335	1.00171	0.349098	29	1	26	1	0.0959562	0.0592084	0.0689257	0.163006	0.45679	0.379205	0.379205	0.7	2.01967	0.00964417	0.0909686	0.00387854	0.0348253	0.0276036	0.0875984	0.0262486	0.0336954	0.0177932	0.0689264	0.0605891	0	0	0	0	0	0
20221	DEPDC1B	HGNC:24902	ENSG00000035499	ENSGALG00000014729	ENSACAG00000009000	ENSNSUG00000003211	Avian	0	1064.94	0	0.728	-0.902448	0.384235	0.174267					0.0553241	0.123288	0.121369	0.0672157	0.147812			20.7	11.8684	0.392689	0.00566623	0.00776304	0.00656617	0.00693484	0.00459869	0.0699117				0.131294	0	0	0	0	0	0
20222	ELOVL7	HGNC:26292	ENSG00000164181	ENSGALG00000014730	ENSACAG00000008996	ENSNSUG00000003214	Avian	85	1064.94	0.0798167	0.106	-0.400931	0.50982	0.1034	1	1	1	1	0.173333	0.0773365	0.111896	0.293042	0.261145	0.277743	0.277743	7.1	6.54487	0.00190438	0.0165868	0.00124055	0.0200242	0.00806974	0.00465332	0.0266441	0.00279088	0.0175102	0.900112	0.175568	0	0	0	0	0	0
20223	ERCC8	HGNC:3439	ENSG00000049167	ENSGALG00000014732	ENSACAG00000008899	ENSNSUG00000003214	Avian	0	1064.94	0	0.453	-1.46333	-0.0935379	0.0121					0.0813087	0.270075		0.403367	0.252046	0.728371	0.728371	12.6	7.8484	0.0569479	0.0211017	0.0298883	0.0201722	0.0270733	0.0199082	0.0273092	0.0120011	0.00537709	0.240699	0.20765	0	0	0	0	0	0
20224	NDUFAF2	HGNC:28086	ENSG00000164182	ENSGALG00000027564	ENSACAG00000008879	ENSNSUG00000003219	Avian	0	1064.94	0	0.014	-1.66122	-0.234814		2	1			0.210222	0.188863	0.317272	0.38457		0.772937	0.772937	25	8.70585	0.0291431	0.0313576	0.0240182	0.0247996	0.0221268	0.0321457	0.0210352	0.0573477	0.169544	0.244365	0.176718	0	0	0	1	0	0
20225	SMIM15	HGNC:33861	ENSG00000188725	ENSGALG00000023443	ENSACAG00000008871	ENSNSUG00000003220	Avian	0	1064.94	0		0.0674878	0.488617	0.0940286					0.0143452	0.0787818	0.0414809	0.0625	0.431913			58.7	77.8215	0.019057	0.0332587	0.0342959	0.0192408	0.0256824	0.0198501	0.0329074	0.0148481	0.048859		0.123201	0	0	0	0	0	0
20226	ZSWIM6	HGNC:29316	ENSG00000130449	ENSGALG00000014734	ENSACAG00000008772	ENSNSUG00000003223	Avian	439.04	1064.94	0.412267	0.591			0.361048	29	1	23	1		0.0545564	0.130602	0.337835	0.406495	0.494289	0.494289		4.19606	0.031047	0.0283404	0.0202623	0.0285914	0.0173862	0.0274978	0.0296337	0.0679403	0.0153458	0.188493	0.10097	0	1	0	0	0	1
20227	KIF2A	HGNC:6318	ENSG00000068796	ENSGALG00000014737	ENSACAG00000008507	ENSNSUG00000003226	Avian	435.34	1064.94	0.408793	0.149	-1.54404	-1.92888	0.19925	6	1	7	1	0.0258096	0.110902	0.0209302	0.236682	0.38808	0.397962	0.397962	4	42.0241	0.104478	0.0188327	0.0233426	0.0198788	0.0264691	0.0201974	0.0229569	0.0330221	0.107384	0.141187	0.139178	0	0	0	0	0	1
20228	DIMT1	HGNC:30217	ENSG00000086189	ENSGALG00000020569	ENSACAG00000008504	ENSNSUG00000003230	Avian	0	1064.94	0				0.0374444					0.0405713	0.0470488	0.0365333	0.184962	0.270654	0.5028	0.5028	79.6	64.1475	0.020027	0.030549	0.0285512	0.0266246	0.0298401	0.0246864	0.0301959	0.0176456	0.0932126	0.191749	0.260102	0	0	0	1	0	0
20229	IPO11	HGNC:20628	ENSG00000086200	ENSGALG00000014740	ENSACAG00000008472	ENSNSUG00000003235	Avian	0	1064.94	0	0.661			0.163864			2	1	0.0390942	0.118885	0.0753435	0.327212	0.294118	0.759341	0.759341	20.3	67.6731	0.0869186	0.0212353	0.0260978	0.0399661	0.0278991	0.0221042	0.0238535	0.0434903	0.092829	0.237791	0.202579	0	0	0	0	0	0
20230	HTR1A	HGNC:5286	ENSG00000178394	ENSGALG00000014742		ENSNSUG00000003235	Avian	0	1064.94	0	0.441	0.748111	0.497192	0.00275					0.0666905	0.0525868				0.25135	0.25135		0.261673	0.00372288		0.0138107					0.00238763	0.148107	0.00537227		0	0	0	0	0	0
20231	RNF180	HGNC:27752	ENSG00000164197	ENSGALG00000014743	ENSACAG00000015602	ENSNSUG00000003256	Avian	0	1064.94	0	0.341	-0.589129	-0.289323	0.177679					0.29088	0.379293	0.466093	0.186107	0.374464	0.407971	0.407971	0.6	0.637992	0.0183652	0.0458938	0.0320343	0.0684743	0.0343375	0.0273112	0.0113168	0.0254278	0.0063582	0.612788	0.0471478	0	0	0	0	0	0
20232	RGS7BP	HGNC:23271	ENSG00000186479	ENSGALG00000027389	ENSACAG00000015618	ENSNSUG00000003257	Avian	198.7	1064.94	0.186583	0.527	0.136479	-0.27661	0.210553			1		0.0801674	0.0433968	0.113466	0.0625		0.370375	0.370375		1.72608	0.00540852	0.0346408	0.0245825	0.0184424	0.0161641	0.00355574	0.00372063	0.00767561	0.00158509	0.272771	0.0704587	0	0	0	0	0	0
20233	SREK1IP1	HGNC:26716	ENSG00000153006	ENSGALG00000026028	ENSACAG00000015621	ENSNSUG00000003258	Avian	0	1064.94	0		-0.706039	-0.00651475	0.105167					0.0549902	0.0379747	0.0958545	0.188366		0.537364	0.537364	4.4	18.4747	0.0424939	0.0303151	0.0229007	0.0294746	0.0225025	0.0211876	0.0443565	0.194197	0.203517	0.141941	0.186074	0	0	0	0	0	0
20234	CWC27	HGNC:10664	ENSG00000153015	ENSGALG00000014747	ENSACAG00000015631	ENSNSUG00000003260	Avian	0	1064.94	0		-0.0528735	-0.102437						0.0585543	0.095898	0.133761	0.376885	0.525957	0.69123	0.69123	20.7	24.2885	0.0591143	0.0273548	0.0281337	0.0262003	0.0275161	0.028752	0.0239735	0.0966424	0.0657565	0.199164	0.0727339	0	0	0	0	0	0
20235	ADAMTS6	HGNC:222	ENSG00000049192	ENSGALG00000014751	ENSACAG00000015670	ENSNSUG00000003266	Avian	0	1064.94	0	0.351	1.24562	0.428657						0.0751964	0.199824			0.175948				10.7102	0.0668378	0.0190701	0.020873	0.0759193	0.108841	0.0318511	0.0263883				0.0543027	0	0	0	0	0	0
20236	CENPK	HGNC:29479	ENSG00000123219	ENSGALG00000014753	ENSACAG00000015759	ENSNSUG00000003275	Avian	40.9	1064.94	0.0384059	0.446	-2.62354	-2.53125	0.00533333					0.341452		0.24682	0.112837	0.125299	0.511324	0.511324	26.7	31.6272	0.152668	0.0122079	0.0258525	0.0109878	0.0205266	0.00997873	0.0506742	0.457386	0.483907	0.488927	0.180187	0	0	0	0	0	0
20237	PPWD1	HGNC:28954	ENSG00000113593	ENSGALG00000014756	ENSACAG00000015772	ENSNSUG00000003275	Avian	0	1064.94	0	0.324	0.839239	0.369171	0.014381					0.0305931	0.0430052		0.330728	0.506976	0.799989	0.799989	40.3	73.3	0.0332725	0.0227536	0.036402	0.0507702	0.0284326	0.023792	0.0241671	0.0293003	0.0729515	0.312504	0.103937	0	1	0	0	0	0
20238	TRIM23	HGNC:660	ENSG00000113595	ENSGALG00000014765	ENSACAG00000015817	ENSNSUG00000003280	Avian	0	1064.94	0	0.55	0.400013	0.173923	0.254429			2	1	0.035746	0.0544127	0.0384162	0.287406	0.329466	0.28982	0.28982	5.9	11.0683	0.0289049	0.0211031	0.021352	0.0464176	0.019639	0.0224258	0.0138652	0.0124946	0.0262477	0.099879	0.098547	0	0	0	1	0	0
20239	SHLD3	HGNC:53826	ENSG00000253251	ENSGALG00000031991	ENSACAG00000021086	ENSNSUG00000005272	Avian	0	1064.94	0														0.63914												0.0110649	0.168887		0	0	0	0	0	0
20240	TRAPPC13	HGNC:25828	ENSG00000113597	ENSGALG00000014767	ENSACAG00000015838	ENSNSUG00000003282	Avian	40.9	1064.94	0.0384059		-0.317964	0.613406	0.0305714					0.0288174	0.0438419	0.045954	0.146736	0.438502	0.797735	0.797735	15.1	15.239	0.0276105	0.0280903	0.0185434	0.0348899	0.0255839	0.0259035	0.0261658	0.0144808	0.0307557	0.179247	0.329845	0	0	0	0	0	1
20241	SGTB	HGNC:23567	ENSG00000197860	ENSGALG00000014768	ENSACAG00000015873	ENSNSUG00000003492	Avian	125.9	1064.94	0.118223	0.24	0.365978	1.12942	0.136556					0.0253202	0.145443	0.0470606		0.298653	0.285469	0.285469	5.9	14.2733	0.00512329	0.0125469	0.010707	0.0217226	0.0187821	0.0114427	0.00832999	0.0197685	0.0225916	0.0771803	0.0724383	0	0	0	0	0	1
20242	NLN	HGNC:16058	ENSG00000123213	ENSGALG00000014769	ENSACAG00000015913	ENSNSUG00000003496	Avian	0	1064.94	0	0.302	0.915923	0.758747	0.117946					0.102157	0.0703685	0.0834265	0.225844	0.781828	0.593857	0.593857	3.3	16.0335	0.0104386	0.0168547	0.0168583	0.0106838	0.0220571	0.0142624	0.0245528	0.0224562	0.0236067	0.258885	0.00818163	0	0	0	0	0	0
20243	ERBIN	HGNC:15842	ENSG00000112851	ENSGALG00000014773	ENSACAG00000016015	ENSNSUG00000003505	Avian	40.9	1064.94	0.0384059	0.378	-0.51299	-0.474124	0.194571	22	1	18	1	0.11639	0.131492	0.143068	0.19958	0.39192	0.638931	0.638931	9.8	19.7385	0.0210631	0.0228292	0.0213594	0.0279738	0.0247625	0.0264647	0.0201298	0.0282254	0.0181736	0.20354	0.196359	0	0	0	0	0	1
20244	SREK1	HGNC:17882	ENSG00000153914	ENSGALG00000014775		ENSNSUG00000003505	Avian	403.94	1064.94	0.379308		0.772212	-0.420332	0.254452	14	1	8	1	0.107871	0.0443636		0.250232	0.445326	0.388036	0.388036	9.2	27.3735	0.0273105	0.0288937	0.0393934	0.0255481	0.0384598	0.0313059	0.0311592	0.107832	0.041358	0.0966979	0.160708	0	0	0	1	0	1
20245	MAST4	HGNC:19037	ENSG00000069020	ENSGALG00000014784	ENSACAG00000016206	ENSNSUG00000006735	Avian	0	1064.94	0	0.208	-0.175577	-0.221866		21	1	16	1	0.166586	0.0632154		0.112841	0.233822	0.407601	0.407601	1.4	3.81977	0.0410821	0.0192088	0.0318915	0.0460589	0.0317833	0.0149986	0.0607886	0.137938	0.100354	0.240128	0.0292447	1	0	0	0	0	0
20246	CD180	HGNC:6726	ENSG00000134061	ENSGALG00000023411	ENSACAG00000016275	ENSNSUG00000006736	Avian	0	1064.94	0	0.054	0.752591	-0.0682237	0.0645938					0.248113		0.425007		0.227264				0.013365	0.0110998	0.0134496	0.00740417	0.00580415	0.00852836	0.0117145	0.00721294	0.00856736	0.00203102		0.0749828	0	0	0	0	0	0
20247	PIK3R1	HGNC:8979	ENSG00000145675	ENSGALG00000014786		ENSNSUG00000006761	Avian	0	1064.94	0	0.894	1.31266	1.069	0.278282	15	1	11	1	0.0411598	0.129689		0.45122	0.373734	0.65122	0.65122	0.8	1.20916	0.00501896	0.02253	0.0375728	0.0871346	0.0523467	0.0365946	0.0259786	0.0211859	0.00424675	0.166301	0.119422	0	0	0	1	0	0
20248	SLC30A5	HGNC:19089	ENSG00000145740	ENSGALG00000014787	ENSACAG00000016363	ENSNSUG00000006947	Avian	0	1064.94	0	0.504	0.148408	0.604737	0.113571			2	1	0.0592244	0.0587397	0.125377	0.547426	0.631286	0.402318	0.402318	9	24.7451	0.0203685	0.0320826	0.0324441	0.0373157	0.0318306	0.0234901	0.0280891	0.0204559	0.0320896	0.14121	0.109357	0	0	0	0	0	0
20249	CENPH	HGNC:17268	ENSG00000153044	ENSGALG00000014788	ENSACAG00000016440	ENSNSUG00000006947	Avian	0	1064.94	0	0.134	-0.375147	0.215121	0.00127273					0.397661			0.18789	0.169491	0.511474	0.511474	30.4	152.393	0.300999	0.017633	0.0325915	0.0245833	0.0244619	0.0206246	0.0647827	0.471123	0.548118	0.270897	0.157227	0	0	0	0	0	0
20250	MRPS36	HGNC:16631	ENSG00000134056	ENSGALG00000014789	ENSACAG00000016447	ENSNSUG00000007130	Avian	256	1064.94	0.240389	0.103	0.0224271	0.175221	0.1139					0.139181	0.183887		0.461512	0.634189	0.674108	0.674108	24.2	84.6638	0.01666	0.0212345	0.0180653	0.0194876	0.0168369	0.023746	0.0189967	0.00775524	0.0277737	0.22031	0.244138	0	0	0	0	0	0
20251	CDK7	HGNC:1778	ENSG00000134058	ENSGALG00000014790	ENSACAG00000016452	ENSNSUG00000007132	Avian	0	1064.94	0	0.72	0.370519	-0.554455	0.033					0.0448788	0.0842718	0.0436605	0.325733	0.615899			92.2	34.6236	0.0872315	0.0245367	0.0201833	0.0163544	0.0212727	0.019671	0.0357174	0.0203965	0.112077			0	0	0	0	0	0
20252	SERINC5	HGNC:18825	ENSG00000164300	ENSGALG00000014798	ENSACAG00000016493	ENSNSUG00000007170	Avian	0	1064.94	0	0.131	-0.442493	0.531403	0.198833					0.179977	0.0950802	0.173096	0.224072	0.350094	0.493488	0.493488	8.1	45.1869	0.0598311	0.0408171	0.0339835	0.016478	0.0120391	0.00732739	0.0373652	0.0967946	0.0728536	0.506598	0.112091	0	0	0	1	0	0
20253	THBS4	HGNC:11788	ENSG00000113296	ENSGALG00000014804	ENSACAG00000016545	ENSNSUG00000019141	Avian	0	1064.94	0	0.154	-1.04225	0.83054	0.18925					0.0671798	0.149184		0.261312	0.167413			1.5	12.8028	0.0184716	0.00734605	0.00346872	0.00765706	0.00474014	0.0165476	0.000390822	0.245849	0.242967		0.0752289	0	0	0	1	0	0
20254	MTX3	HGNC:24812	ENSG00000177034	ENSGALG00000014807	ENSACAG00000016636	ENSNSUG00000007207	Avian	40.9	1064.94	0.0384059	0.259	-0.688119	0.333247	0.119083	1	1			0.111445	0.295498	0.152326	0.271018	0.530673	0.343995	0.343995	4.5	11.5485	0.0179245	0.0256867	0.0382973	0.0331884	0.0298924	0.0274895	0.0231694	0.0194006	0.0104116	0.127622	0.0748769	0	0	0	0	0	0
20255	CMYA5	HGNC:14305	ENSG00000164309	ENSGALG00000026553	ENSACAG00000016641	ENSNSUG00000007222	Avian	164	1064.94	0.153999	0.08	-0.422789	0.206259	0.00333333					0.443682	0.329955		0.124775		0.283566			0.0133525	0.000353351	0.00146232	0.01265	0.0193703	0.00583449	0.00133241	0.00103931	0.00346299	0.000934269	0.0927786		0	0	0	1	0	0
20256	TENT2	HGNC:26776	ENSG00000164329	ENSGALG00000014810	ENSACAG00000016683	ENSNSUG00000007340	Avian	0	1064.94	0	0.162	-0.01236	0.487403	0.2143	3	1	3	1	0.134574	0.456766	0.237929	0.412673	0.432037	0.725234	0.725234	10.4	19.9314	0.0280931	0.0247566	0.0350865	0.0558346	0.0279301	0.0244578	0.0258366	0.0366779	0.0205788	0.284133	0.0961615	1	0	0	0	0	0
20257	HOMER1	HGNC:17512	ENSG00000152413	ENSGALG00000014813	ENSACAG00000016736	ENSNSUG00000007342	Avian	504.6	1064.94	0.47383	0.736	0.929497	-0.921905	0.234097	23	1	30	1	0.0277778	0.0736568	0.0429253	0.0625	0.137762	0.527605	0.527605	1.5	2.20672	0.0335121	0.00994019	0.015947	0.0047899	0.0278182	0.00901364	0.0208456	0.0461273	0.0198285	0.246605	0.123665	0	0	0	0	0	1
20258	JMY	HGNC:28916	ENSG00000152409	ENSGALG00000014819	ENSACAG00000016753	ENSNSUG00000007346	Avian	289.9	1064.94	0.272222		0.619389	-1.14261	0.178647	8	1			0.144347	0.11833	0.106501	0.0625	0.396245	0.665025	0.665025	24.9	9.4291	0.0387134	0.0285624	0.0388722	0.0850732	0.0263777	0.0693092	0.0225126	0.0827085	0.129011	0.310282	0.0919466	0	0	0	0	0	1
20259	BHMT	HGNC:1047	ENSG00000132840	ENSGALG00000004518	ENSACAG00000016768	ENSNSUG00000008307	Avian	0	1064.94	0	0.093	0.759193	-2.53125	0.0415455					0.167337	0.111111	0.0716049	0.185894	0.122918			5.3	0.489143	0.0014071	0.000857773	0.000555632	0.000784973	0.000539592	0.000978616	0.000366034	0.00218552	0.000280018			0	0	0	0	0	0
20260	DMGDH	HGNC:24475	ENSG00000132837	ENSGALG00000004491	ENSACAG00000016799	ENSNSUG00000007356	Avian	0	1064.94	0	0.076	-1.99579	-2.53125	0.00675			1	1	0.0964647	0.102222	0.148575	0.06557	0.132436	0.540874	0.540874	0.1	0.0722332	0.010434	0.00984725	0.0136467	0.017631	0.0070256	0.00815542	0.00204421	0.0150663	0.00190143	0.462215	0.000839838	0	0	0	0	0	0
20261	ARSB	HGNC:714	ENSG00000113273	ENSGALG00000004438	ENSACAG00000016838	ENSNSUG00000007357	Avian	0	1064.94	0	0.054	0.772417	-0.433791	0.0565909			1	1	0.218513	0.152725	0.124609	0.226164	0.376293	0.337709	0.337709	0.3	5.3974	0.0115655	0.0360193	0.0143332	0.0189954	0.0397345	0.031729	0.013541	0.0264842	0.0240897	0.740282	0.0546912	0	0	0	1	0	0
20262	LHFPL2	HGNC:6588	ENSG00000145685	ENSGALG00000004437	ENSACAG00000012574	ENSNSUG00000007360	Avian	0	1064.94	0	0.359	0.388144	-0.774571	0.176743	6	1			0.134245	0.0726523	0.0915693	0.0625	0.417144	0.37748	0.37748	0.9	14.3913	0.0181926	0.0304164	0.0368481	0.0261187	0.0276589	0.0227338	0.0142564	0.0060957	0.00509153	0.170196	0.0544423	0	0	0	0	0	0
20263	SCAMP1	HGNC:10563	ENSG00000085365	ENSGALG00000004425	ENSACAG00000012476	ENSNSUG00000007366	Avian	408.6	1064.94	0.383684	0.902	0.502102	-1.041	0.101417	2	1	2	1	0.0110175	0.0147267	0.117222	0.382023	0.342498	0.312291	0.312291	16.4	46.0305	0.0157012	0.0245185	0.0168037	0.0182807	0.0212774	0.0216499	0.0218471	0.0839299	0.0392432	0.0543475	0.0479252	0	0	0	0	0	0
20264	AP3B1	HGNC:566	ENSG00000132842	ENSGALG00000004390	ENSACAG00000007430	ENSNSUG00000007370	Avian	0	1064.94	0	0.335	0.824427	1.11481	0.137381	7	1	5	1	0.133751	0.218732	0.181851	0.40204	0.402349	0.796235	0.796235	15.2	46.6519	0.0214312	0.0235925	0.0221934	0.0182297	0.0281635	0.0230118	0.0343228	0.0589052	0.100969	0.308651	0.193796	0	1	0	0	0	0
20265	TBCA	HGNC:11579	ENSG00000171530	ENSGALG00000004353	ENSACAG00000014223	ENSNSUG00000008919	Avian	166	1064.94	0.155877	0.263	-2.14784	-0.619075	0.0423333			1		0.194844	0.0452403	0.0896657	0.483246	0.348199	0.631429	0.631429	137.8	52.7607	0.0218221	0.0305152	0.0298835	0.0303432	0.0207212	0.0269787	0.0213106	0.158713	0.0851242	0.259625	0.587353	0	0	0	0	0	0
20266	OTP	HGNC:8518	ENSG00000171540	ENSGALG00000026744	ENSACAG00000007695	ENSNSUG00000007466	Avian	0	1064.94	0	0.187	-1.27009	0.563927	0.293857	3		4				0.0625349			0.25			0.163104	0.0150071							0.0464732				0	0	0	0	0	0
20267	WDR41	HGNC:25601	ENSG00000164253	ENSGALG00000004350	ENSACAG00000007717	ENSNSUG00000007467	Avian	40.9	1064.94	0.0384059	0.393	0.053775	0.254391	0.0711296	2	1			0.154169	0.237209		0.337389	0.42055	0.756386	0.756386	16.5	8.28787	0.0462205	0.0209715	0.0170426	0.0259323	0.0251939	0.0162744	0.0298345	0.0494805	0.0548525	0.285405	0.102344	0	0	0	0	0	0
20268	PDE8B	HGNC:8794	ENSG00000113231	ENSGALG00000004339	ENSACAG00000007748	ENSNSUG00000007470	Avian	0	1064.94	0	0.462	0.67702	0.167625	0.248571	5	1	2	1	0.0467183	0.113769	0.107993	0.0763107	0.153529			4.3	1.79356	0.00691355	0.0548616	0.00455573	0.0966205	0.0587775	0.00623241	0.00614422	0.0338104	0.0081667		0.543945	0	0	0	1	0	0
20269	AGGF1	HGNC:24684	ENSG00000164252	ENSGALG00000004311	ENSACAG00000007847	ENSNSUG00000008042	Avian	0	1064.94	0	0.445	-0.585007	0.0953391	0.16425	1	1	1	1	0.134366	0.17171	0.213267	0.223954	0.330253	0.620778	0.620778	10.2	12.5949	0.0516431	0.0203879	0.0269227	0.0285315	0.0236406	0.0202387	0.0228191	0.111055	0.1208	0.152799	0.100032	0	0	0	1	0	0
20270	CRHBP	HGNC:2356	ENSG00000145708	ENSGALG00000014994	ENSACAG00000007916	ENSNSUG00000008150	Avian	0	1064.94	0	0.662	0.00215379	-0.584405	0.0415					0.119762	0.0726869	0.211984	0.110108	0.120922	0.3168	0.3168	1	1.66774	0.00309996	0.00866336	0.00390007	0.063586	0.0066715	0.00159837	0.00210073	0.0129031	0.143063	0.0262267		0	0	0	0	0	0
20271	S100Z	HGNC:30367	ENSG00000171643	ENSGALG00000014989	ENSACAG00000007976	ENSNSUG00000008153	Avian	0	1064.94	0	0.092	0.396165	-1.30795	0.0511					0.0698043	0.0957789	0.0644546	0.105662				2.4		0.0138996	0.0167625	0.00478509	0.00888436	0.00684696	0.00992354	0.010689	0.184933				0	0	0	0	0	0
20272	F2RL1	HGNC:3538	ENSG00000164251	ENSGALG00000014984		ENSNSUG00000008164	Avian	0	1064.94	0	0.272	-0.633645	-2.53125	0.0271818					0.120516	0.209366			0.317057	0.408258	0.408258	119.4	35.135	0.00141826	0.00421895	0.00119354	6.2734e-05	0.000679828	0.000714109	0.0266748	0.022247	0.00506371	0.169751	0.0668381	0	0	0	0	0	0
20273	F2R	HGNC:3537	ENSG00000181104	ENSGALG00000014983	ENSACAG00000007987	ENSNSUG00000008166	Avian	0	1064.94	0	0.063	-0.330755	-0.922815	0.0422778					0.131095		0.214655	0.0625	0.240954	0.382175	0.382175	1.5	2.65615	0.0189932	0.0216338	0.00683414	0.0242846	0.0205176	0.00692201	0.00970558	0.00779242	0.0470953	0.130152	0.0392661	0	0	0	0	1	0
20274	F2RL2	HGNC:3539	ENSG00000164220	ENSGALG00000023379	ENSACAG00000008312	ENSNSUG00000010480	Avian	0	1064.94	0	0.114	-2.39467	0.582109	0.0387222					0.268393	0.135683	0.26433		0.345704	0.44008	0.44008	0.2	0.00923332	0.0105648	0.0153362	0.00483434	0.00506763	0.0219953	0.029883	0.00649084		0.0104677	0.210149	0.0891082	0	0	0	0	0	0
20275	IQGAP2	HGNC:6111	ENSG00000145703	ENSGALG00000014978	ENSACAG00000007992	ENSNSUG00000008168	Avian	0	1064.94	0	0.477	-2.62354	-1.14173	0.203733	7	1	7	1	0.104016	0.0949495	0.0929702	0.233369	0.289991	0.520559	0.520559	5.5	10.3089	0.108773	0.0143052	0.00950639	0.00641307	0.00390682	0.00621771	0.00674034	0.0106151	0.0185332	0.344828	0.02122	1	0	0	0	0	0
20276	SV2C	HGNC:30670	ENSG00000122012	ENSGALG00000014967	ENSACAG00000008315	ENSNSUG00000010481	Avian	0	1064.94	0	0.14	-0.220893	-0.037208	0.1245	3				0.0230756	0.0832767	0.173399		0.132249	0.251076	0.251076		0.0227484	0.00370937	0.00431556	0.00495564	0.00231667	0.00108208	0.00306589	0.00155618	0.0535666	0.00502846	0.00111664	0.0558735	0	0	0	0	0	0
20277	POC5	HGNC:26658	ENSG00000152359	ENSGALG00000014960	ENSACAG00000008393	ENSNSUG00000010508	Avian	0	1064.94	0		-0.700738	0.923079	0.0015					0.186325	0.462942	0.19679	0.216504	0.174701	0.520201	0.520201	16.6	22.7769	0.112661	0.0289781	0.0425733	0.0371517	0.0345527	0.0203096	0.0281327	0.442019	0.547404	0.276314	0.400605	0	0	0	0	0	0
20278	ANKDD1B	HGNC:32525	ENSG00000189045	ENSGALG00000014958	ENSACAG00000008414	ENSNSUG00000010511	Avian	0	1064.94	0				0.006375					0.253064	0.252802	0.214091		0.241417	0.344755	0.344755	1.6	0.647615	0.0521736	0.0136307	0.0113786	0.00407936	0.0115427	0.0103886	0.0299658	0.0574873	0.00920921	0.725152	0.186007	0	0	0	0	0	0
20279	POLK	HGNC:9183	ENSG00000122008	ENSGALG00000014956	ENSACAG00000008458	ENSNSUG00000010513	Avian	0	1064.94	0	0.122	0.695093	0.695655	0.0328696					0.228007	0.301129	0.200643	0.502643	0.31062	0.734873	0.734873	1.7	2.12911	0.0704266	0.0206646	0.030243	0.0409724	0.0317817	0.0277503	0.0192679	0.0944989	0.0180202	0.300802	0.0814423	0	0	0	0	0	0
20280	CERT1	HGNC:2205	ENSG00000113163	ENSGALG00000014952	ENSACAG00000008556	ENSNSUG00000010520	Avian	565.6	1064.94	0.53111	0.193	1.23062	0.457874	0.182129	17	1	15	1	0.0403881	0.0405272	0.0778123	0.412012	0.347388	0.650211	0.650211	9.3	23.0649	0.0436378	0.0194273	0.0219185	0.0308041	0.0219314	0.0232914	0.0294064	0.0798726	0.0965363	0.162677	0.0820608	1	1	0	0	0	0
20281	MED18	HGNC:25944	ENSG00000130772	ENSGALG00000028149		ENSNSUG00000013910	Avian	0	1064.94	0	0.063	-0.0244483	-1.55581	0.005					0.0110574	0.00258844		0.391203		0.606257	0.606257	41.3	40.524	0.0315728	0.0196278	0.0171634	0.0205018	0.0253914	0.0263661	0.0306403	0.0139729	0.0486108	0.186655	0.539969	0	0	0	0	0	0
20282	HMGCR	HGNC:5006	ENSG00000113161	ENSGALG00000014948	ENSACAG00000008698	ENSNSUG00000010526	Avian	85	1064.94	0.0798167	0.879	0.540085	0.00111458	0.157176	1	1			0.0598192	0.0684239	0.0828095	0.308012	0.30469	0.680156	0.680156	13	40.5153	0.0198095	0.0125989	0.0131549	0.0135634	0.010229	0.0092357	0.0740688	0.0178421	0.00718051	0.264636	0.0364796	0	0	0	0	0	0
20283	ANKRD31	HGNC:26853	ENSG00000145700	ENSGALG00000051796	ENSACAG00000008933	ENSNSUG00000010643	Avian	85	1064.94	0.0798167	0.115			0.01825					0.58217			0.0625					10.3178	0.67921	0.0084477	0.0366963	0.0271325	0.0185143	0.0118462	0.141182				0.0277095	0	0	0	0	0	0
20284	GCNT4	HGNC:17973	ENSG00000176928	ENSGALG00000014944	ENSACAG00000008942	ENSNSUG00000010536	Avian	0	1064.94	0	0.15	1.02025	1.04516	0.149413					0.176707		0.217278		0.287133	0.457146	0.457146		0.0665764	0.0238792	0.0178905	0.0105796	0.0641851	0.0231325	0.0225276	0.0354463	0.0273693	0.00620068	0.400397	0.014419	0	0	0	0	0	0
20285	FAM169A	HGNC:29138	ENSG00000198780	ENSGALG00000014943	ENSACAG00000008952	ENSNSUG00000010538	Avian	40.9	1064.94	0.0384059		1.32915	1.10852	0.0543889	1		3	1	0.224695	0.510497	0.181674		0.267511	0.292927	0.292927	5.1	3.79978	0.108425	0.0153345	0.0155673	0.00553619	0.00334439	0.00310364	0.00625757	0.0514447	0.170753	0.110415	0.0320539	0	0	0	1	0	0
20286	NSA2	HGNC:30728	ENSG00000164346	ENSGALG00000014942	ENSACAG00000008969	ENSNSUG00000010546	Avian	0	1064.94	0		1.19081	0.370786	0.00238462						0.0376116	0.0126042	0.169098	0.418893	0.587518	0.587518	107.2	395.303	0.0370648	0.0287948	0.0496253	0.0619772	0.0298351	0.0343722	0.0260734	0.0469701	0.068648	0.209583	0.256295	0	0	0	0	0	0
20287	GFM2	HGNC:29682	ENSG00000164347	ENSGALG00000014939	ENSACAG00000009011	ENSNSUG00000010550	Avian	0	1064.94	0	0.113	0.134871	0.98539	0.033					0.14364	0.162885	0.141121	0.180261	0.49438	0.461223	0.461223	9.6	12.7037	0.0376384	0.0170179	0.0193912	0.0180389	0.0167437	0.018014	0.0203933	0.0502071	0.0539673	0.13943	0.0660219	1	0	0	0	0	0
20288	HEXB	HGNC:4879	ENSG00000049860	ENSGALG00000014933	ENSACAG00000009147	ENSNSUG00000010836	Avian	0	1064.94	0	0.195	-2.40322	0.850057	0.024					0.317493	0.213751	0.276679	0.452859	0.391553	0.25713	0.25713	11.7	57.4845	0.00611207	0.0258598	0.0243172	0.0422545	0.0265139	0.0193078	0.0204196	0.0951828	0.0681309	0.0158565	0.00807638	0	0	0	0	0	0
20289	ENC1	HGNC:3345	ENSG00000171617	ENSGALG00000014930	ENSACAG00000001854	ENSNSUG00000010842	Avian	0	1064.94	0	0.756	0.418373	0.610826	0.159536	14	1	11	1	0.00604524	0.0020015	0.19639	0.0854919	0.177384	0.314234	0.314234	0.1	19.36	0.00779334	0.00924585	0.0194235	0.00890018	0.00247744	0.00229005	0.00318381	0.00524694	0.0658194	0.173895	0.0417459	0	0	0	0	0	0
20290	ARHGEF28	HGNC:30322	ENSG00000214944	ENSGALG00000014923	ENSACAG00000009305	ENSNSUG00000010843	Avian	0	1064.94	0		0.973738	1.01765	0.130625					0.187416	0.285527	0.21868	0.155088	0.175133	0.404027	0.404027		0.113041	0.00693089	0.00932198	0.0634011	0.0604257	0.014928	0.003618	0.0195106	0.0156517	0.0215638	0.202529	0.0441034	0	0	0	0	0	0
20291	UTP15	HGNC:25758	ENSG00000164338	ENSGALG00000013510	ENSACAG00000009351	ENSNSUG00000010848	Avian	0	1064.94	0	0.169	1.01819	0.945322	0.059					0.105465	0.14761	0.159003	0.293621	0.562454	0.725932	0.725932	28.2	152.495	0.0256147	0.0289965	0.0258444	0.0457791	0.0290258	0.0275356	0.0355156	0.00680994	0.0922201	0.258226	0.288957	0	0	0	1	0	0
20292	ANKRA2	HGNC:13208	ENSG00000164331	ENSGALG00000013511	ENSACAG00000009434	ENSNSUG00000010939	Avian	0	1064.94	0	0.345	1.05798	0.908228	0.2155	1	1			0.0463803	0.0479846	0.0265123	0.27513	0.60227	0.32596	0.32596	7.1	33.8872	0.0225592	0.0339498	0.0346815	0.0689974	0.0259585	0.0264365	0.0225333	0.0211767	0.0276909	0.156766	0.136564	0	0	0	0	0	0
20293	BTF3	HGNC:1125	ENSG00000145741	ENSGALG00000013512	ENSACAG00000009509	ENSNSUG00000010940	Avian	367.04	1064.94	0.344658	0.352	0.226483	0.68863	0.317714	3	1	3	1	0.0865854		0.0168043	0.492253	0.644105	0.678452	0.678452	289	452.114	0.0134555	0.0283227	0.0537769	0.0582977	0.0290232	0.0300469	0.0323313	0.0309892	0.0436824	0.368486	0.7991	0	0	0	0	0	0
20294	FOXD1	HGNC:3802	ENSG00000273514		ENSACAG00000008123	ENSNSUG00000015644	Avian	199.7	1064.94	0.187522				0.13125	5	1	4	1	0.19593		0.0813178					0.1	1.61969	0.0879568	0.00184686	0.000995043	0.10762	0.00244202	0.00243462	0.00470701					0	0	0	0	0	1
20295	TMEM174	HGNC:28187	ENSG00000164325	ENSGALG00000015021	ENSACAG00000009559	ENSNSUG00000010942	Avian	125.9	1064.94	0.118223	0.299	0.160118	0.949443	0.0454286					0.207263	0.175476	0.392262		0.111192				0.112547	0.00116278							0.00788975	0.000243283			0	0	0	0	0	1
20296	TMEM171	HGNC:27031	ENSG00000157111	ENSGALG00000015020	ENSACAG00000009564	ENSNSUG00000010943	Avian	0	1064.94	0	0.086	0.577559	1.25992						0.289278	0.303428	0.098555	0.128053	0.160126	0.269987	0.269987	1.6	16.3264	0.00399993	0.000364251	0.000294871	0.000522051	0.000200686	0.000493639	0.00153305	0.00663751	0.0114543	0.0300197	0.115191	0	0	0	0	0	0
20297	FCHO2	HGNC:25180	ENSG00000157107	ENSGALG00000015019	ENSACAG00000009572	ENSNSUG00000010944	Avian	283.6	1064.94	0.266306	0.664	-2.62354	-1.79401	0.193524	12	1	7	1	0.0626691	0.0861978	0.136351	0.412826	0.484927	0.893194	0.893194	1.7	10.9531	0.0155869	0.0219546	0.0226576	0.0360342	0.0338719	0.0256659	0.0510783	0.161067	0.0735121	0.279895	0.0863466	0	0	0	0	0	1
20298	TNPO1	HGNC:6401	ENSG00000083312	ENSGALG00000015014	ENSACAG00000009599	ENSNSUG00000011049	Avian	654.94	1064.94	0.615002	0.965	1.31008	1.46897	0.327875	42	1	38	1	0.00344976	0.0392589	0.0421637	0.384974	0.450271	0.341492	0.341492	24.2	33.6495	0.0572327	0.0287598	0.0284072	0.0258437	0.0292369	0.0273018	0.0296229	0.0725031	0.0194076	0.1473	0.116955	0	0	0	0	0	1
20299	ZNF366	HGNC:18316	ENSG00000178175	ENSGALG00000015008	ENSACAG00000009713	ENSNSUG00000011054	Avian	0	1064.94	0	0.193	1.26112	1.36138	0.0811765	1	1			0.0732938	0.118072	0.147435		0.25616	0.534468	0.534468		0.015328	0.00790218	0.021103	0.0111755	0.0658531	0.0436332	0.0117901	0.0167267	0.00704938	0.00944237	0.467755	0.069298	0	0	0	0	0	0
20300	PTCD2	HGNC:25734	ENSG00000049883	ENSGALG00000038260	ENSACAG00000009747	ENSNSUG00000011058	Avian	0	1064.94	0	0.026	0.39387	0.431358	0.0054					0.356078	0.504132	0.338842	0.179662		0.580602	0.580602	6.6		0.0222458	0.0167269	0.0203251	0.0113083	0.0185465	0.0180669	0.0219967	0.0380076	0.0348104	0.164833	0.101473	0	0	0	1	0	0
20301	MRPS27	HGNC:14512	ENSG00000113048	ENSGALG00000015002	ENSACAG00000009787	ENSNSUG00000011062	Avian	40.9	1064.94	0.0384059	0.046	-0.277488	0.631157	0.0171111					0.291537	0.218403	0.239012	0.526153	0.382353	0.861464	0.861464	27.5	22.0898	0.0196659	0.0270774	0.0295595	0.0261478	0.0245181	0.0245111	0.0264488	0.0216276	0.0254383	0.205528	0.0995479	0	0	0	0	0	0
20302	MAP1B	HGNC:6836	ENSG00000131711	ENSGALG00000014999	ENSACAG00000009855	ENSNSUG00000011064	Avian	353.34	1064.94	0.331793	0.898	0.311272	0.636576	0.260595	28	1	19	1	0.0858533	0.187271	0.111398	0.108552	0.124096	0.272134	0.272134	3.5	13.5476	0.00501975	0.0288133	0.00454615	0.0175331	0.020162	0.0122058	0.00642161	0.0897319	0.197636	0.0209356	0.00531907	1	0	0	1	0	0
20303	CARTPT	HGNC:24323	ENSG00000164326	ENSGALG00000038241	ENSACAG00000009933	ENSNSUG00000011068	Avian	0	1176.94	0	0.295	0.431936	0.427818	0.001					0.0523333		0.050064	0.100302		0.273686	0.273686			0.0342312	0.0250013	0.000417478	0.00030745	0.000193078	0.0326684	0.000554372		0.00692087	0.0131582	0.00611845	0	0	0	0	0	0
20304	MCCC2	HGNC:6937	ENSG00000131844	ENSGALG00000002529	ENSACAG00000009948	ENSNSUG00000011070	Avian	0	1176.94	0	0.032	-0.614329	-0.112784	0.0054375					0.0935998	0.109241	0.0801418	0.208557	0.271842	0.560107	0.560107	6.6	14.7517	0.0100899	0.0366753	0.0182367	0.0176155	0.0129563	0.0145306	0.0211931	0.0662922	0.00332669	0.217608	0.156398	0	0	0	0	0	0
20305	BDP1	HGNC:13652	ENSG00000145734	ENSGALG00000002439	ENSACAG00000010001	ENSNSUG00000011120	Avian	0	1176.94	0	0.225	0.210496	-1.01288	0.0860526					0.535455	0.187338		0.350221				10.2	8.71803	0.0282841	0.0242241	0.0278121	0.0392836	0.030227	0.0281082	0.0258646					0	0	0	0	0	0
20306	SERF1A	HGNC:10755	ENSG00000172058	ENSGALG00000051598	ENSACAG00000003491	ENSNSUG00000011121	Avian	40.9	1176.94	0.0347511				0.00117647			1		0.305133		0.161951							0.0655669	0.0171763	0.0296374	0.0214397	0.0216042	0.0191807	0.0160063					0	0	0	0	0	0
20307	STMN1	HGNC:6510	ENSG00000205571	ENSGALG00000002430	ENSACAG00000010017	ENSNSUG00000011123	Avian	0	1176.94	0									0.145097	0.307707	0.137237	0.440357	0.331057	0.599728			154.508								0.11429	0.124963	0.221926		0	0	0	0	0	0
20308	NAIP	HGNC:7634	ENSG00000249437		ENSACAG00000010086	ENSNSUG00000009137	Avian	0	1176.94	0	0.276			0.000875					0.454416		0.309864	0.195672						0.0422095	0.0161221	0.0194939	0.0212653	0.0162943	0.0139555	0.0148092					0	0	0	0	0	0
20309	GTF2H2	HGNC:4656	ENSG00000145736	ENSGALG00000002399	ENSACAG00000010109	ENSNSUG00000005722	Avian	0	1176.94	0									0.0331577	0.0768049	0.108306	0.315027	0.546915				37.5997	0.0497908	0.0186677	0.0327054	0.0189667	0.0258137	0.0257366	0.0239211	0.0206237	0.0180561			0	0	0	0	0	0
20310	MARVELD2	HGNC:26401	ENSG00000152939	ENSGALG00000027140		ENSNSUG00000004662	Avian	0	1176.94	0	0.361			0.0451					0.128537	0.154534		0.0625				7.1	7.89042	0.0168043	0.0230107	0.00264874	0.000629144	0.002973	0.00308481	0.0477708	0.077036	0.077745			0	0	0	0	0	0
20311	RAD17	HGNC:9807	ENSG00000152942	ENSGALG00000015571	ENSACAG00000010254	ENSNSUG00000004663	Avian	0	1176.94	0	0.404	0.495816	-0.00697252	0.0617143					0.191353	0.198264	0.28423	0.313544	0.218492	0.783604	0.783604	17.9	11.7741	0.132966	0.0221885	0.0281994	0.0309496	0.0259288	0.0218184	0.0212906	0.0311337	0.179451	0.194618	0.159859	0	1	0	0	0	0
20312	AK6	HGNC:49151	ENSG00000085231	ENSGALG00000020534	ENSACAG00000010323	ENSNSUG00000004664	Avian	0	1176.94	0		0.112838	0.545764							0.0260197		0.409988	0.32086			200	72.9367	0.0399955	0.0272413	0.0241647	0.025347	0.0208058	0.0259214	0.0168195	0.0976797	0.0974866			0	0	0	0	0	0
20313	CCDC125	HGNC:28924	ENSG00000183323	ENSGALG00000015572	ENSACAG00000010353	ENSNSUG00000004665	Avian	0	1176.94	0	0.115	-0.177716	-1.31044	0.00851724					0.26701	0.246177	0.278035	0.397051		0.406298	0.406298	0.9	21.5014	0.0112588	0.0287875	0.0195907	0.00905254	0.0148582	0.0130052	0.0222283	0.147865	0.0588104	0.0734868	0.0493179	0	0	0	0	0	0
20314	ZFYVE16	HGNC:20756	ENSG00000039319	ENSGALG00000015576	ENSACAG00000010379	ENSNSUG00000004666	Avian	0	1176.94	0	0.507	0.527173	0.858815	0.143227	1	1			0.322452	0.245701		0.509893	0.111111	0.694319	0.694319	2.3	15.3705	0.024068	0.0177622	0.0271556	0.0294921	0.0240737	0.0182161	0.0205916	0.0165126	0.0125298	0.303223	0.0946224	0	0	0	0	0	0
20315	FAM151B	HGNC:33716	ENSG00000152380	ENSGALG00000015577	ENSACAG00000010503	ENSNSUG00000004667	Avian	0	1176.94	0	0.083	0.237842	0.988249	0.043381					0.14272	0.151677	0.186418		0.264837	0.660633	0.660633	0.2	5.09083	0.0530769	0.0287129	0.0145172	0.00420662	0.0201741	0.0176175	0.0272123	0.0399637	0.0194104	0.25309	0.0781425	0	0	0	0	0	0
20316	ANKRD34B	HGNC:33736	ENSG00000189127	ENSGALG00000044727	ENSACAG00000023023	ENSNSUG00000004668	Avian	0	1176.94	0	0.286	0.530416	0.639573	0.0124167					0.174361	0.271962	0.158206			0.476294	0.476294		0.516411	0.00725574	0.00125092		0.00164503				0.0605698		0.524886	0.0276481	0	0	0	0	0	0
20317	DHFR	HGNC:2861	ENSG00000228716	ENSGALG00000026757	ENSACAG00000010508	ENSNSUG00000004669	Avian	0	1176.94	0	0.51	0.358517	0.722955	0.00445833					0.11838	0.0936099	0.222879	0.242205		0.330593	0.330593		58.2126	0.0414981	0.0168689	0.0142534	0.00852403	0.0174465	0.0203291	0.0211428	0.0662241	0.111194	0.0296304	0.0666382	0	0	0	0	0	0
20318	MSH3	HGNC:7326	ENSG00000113318	ENSGALG00000015589	ENSACAG00000010533	ENSNSUG00000004670	Avian	0	1176.94	0	0.486	-0.0672442	-0.208328	0.0408235					0.193462	0.130915	0.219338	0.436654	0.73842	0.458576	0.458576	5	25.3743	0.0241487	0.0241526	0.0273303	0.0110006	0.0225575	0.0212473	0.0330432	0.0308788	0.0385484	0.545166	0.0827022	1	0	0	0	0	0
20319	RASGRF2	HGNC:9876	ENSG00000113319	ENSGALG00000015598	ENSACAG00000010696	ENSNSUG00000004672	Avian	0	1176.94	0	0.161	1.25977	0.206923	0.157579	6	1	3	1	0.116303	0.00380533	0.0757388	0.151174	0.314475	0.257859	0.257859	0.2	0.413104	0.00861971	0.0162519	0.0725703	0.0390169	0.011972	0.0115387	0.00724783	0.04466	0.0052966	0.010175	0.1528	0	0	0	1	0	0
20320	CKMT2	HGNC:1996	ENSG00000131730	ENSGALG00000015602	ENSACAG00000010857	ENSNSUG00000004674	Avian	376.04	1176.94	0.319507	0.138	0.976865	0.509956						0.0399921	0.0279357	0.0752994	0.0908018	0.192736			1.8		0.00122127	0.00298823	0.00378041	0.00297564	0.00202349	0.00113872	0.00152239	0.0359426	0.000448751		0.011009	0	0	0	1	0	0
20321	ZCCHC9	HGNC:25424	ENSG00000131732	ENSGALG00000015603	ENSACAG00000010965	ENSNSUG00000004677	Avian	40.9	1176.94	0.0347511	0.13	1.32576	0.717844	0.0245					0.10757	0.145711	0.129552	0.282031	0.734045	0.687373	0.687373	43.9	19.6566	0.0389016	0.0322175	0.0312377	0.0359294	0.0275342	0.0292899	0.0271367	0.0202929	0.0556039	0.216643	0.23168	0	0	0	0	0	0
20322	ACOT12	HGNC:24436	ENSG00000172497	ENSGALG00000015616	ENSACAG00000010998	ENSNSUG00000007107	Avian	0	1176.94	0	0.11	-0.00414905	0.517231	0.0808					0.185519	0.253304		0.0635253	0.200334	0.323122	0.323122		1.61112	0.0064399	0.00346218	0.000803949	0.000799734	0.00109949	0.00043898	0.00141729	0.107937	0.0626718	0.773702	0.0139709	0	0	0	0	0	0
20323	SSBP2	HGNC:15831	ENSG00000145687	ENSGALG00000023089	ENSACAG00000029227	ENSNSUG00000004681	Avian	0	1176.94	0	0.164	0.278083	-2.15725	0.113345	8	1	5	1	0.00722222	0.0150592	0.169456	0.460641	0.232262	0.416289	0.416289	1.3	43.3319	0.0121546	0.0206108	0.0298215	0.062033	0.0277333	0.0322407	0.0215762	0.209417	0.0740473	0.345603	0.129351	0	0	0	1	0	0
20324	ATG10	HGNC:20315	ENSG00000152348	ENSGALG00000027714	ENSACAG00000028708	ENSNSUG00000004695	Avian	0	1176.94	0	0.058	0.412245	-2.53125	0.0268077					0.179751	0.154151	0.318784	0.0625		0.462888	0.462888	30.1	5.02273	0.0623292	0.0225784	0.0158839	0.0260169	0.0236686	0.0262396	0.0272485	0.0621654	0.0521794	0.264831	0.134775	0	0	0	0	0	0
20325	RPS23	HGNC:10410	ENSG00000186468	ENSGALG00000015617	ENSACAG00000011136	ENSNSUG00000003787	Avian	40.9	1176.94	0.0347511	0.988	0.547603	-0.626842	0.0124828	1		1			0.00460335		0.487807	0.529025	0.486694	0.486694	275.1	2587.64	0.0109257	0.0316521	0.0739019	0.0521169	0.0284941	0.0287181	0.0306011	0.0106304	0.0109666	0.277597	0.70934	0	0	0	0	0	0
20326	ATP6AP1L	HGNC:28091	ENSG00000205464	ENSGALG00000015618	ENSACAG00000011150	ENSNSUG00000004706	Avian	0	1176.94	0		0.78924	-0.211812						0.350486	0.0588005	0.0606996		0.175817	0.36898	0.36898	1.1	0.664751	0.069597	0.0144255	0.0280954	0.0545186	0.0140667	0.0137815	0.00850177	0.159055	0.514414	0.677544	0.00789625	0	1	0	0	0	0
20327	TMEM167A	HGNC:28330	ENSG00000174695	ENSGALG00000027332	ENSACAG00000011153	ENSNSUG00000004709	Avian	0	1176.94	0		0.688985	1.36183	0.139805					0.0437931	0.0450031	0.029997	0.428066		0.536451	0.536451	57.3	54.468	0.012307	0.0205651	0.0164751	0.0185756	0.0189163	0.0132626	0.0201491	0.0102239	0.00776818	0.189333	0.151735	0	0	0	1	0	0
20328	XRCC4	HGNC:12831	ENSG00000152422	ENSGALG00000015620	ENSACAG00000011160	ENSNSUG00000004725	Avian	0	1176.94	0	0.8	-1.28614	0.297985	0.0015					0.248466	0.306075		0.236293	0.437096	0.460409	0.460409	27.8	10.8791	0.0740736	0.0199875	0.0188674	0.0176405	0.022872	0.0227895	0.0283207	0.02385	0.0901936	0.150487	0.0450871	0	0	0	1	0	0
20329	VCAN	HGNC:2464	ENSG00000038427	ENSGALG00000015624	ENSACAG00000011195	ENSNSUG00000004844	Avian	0	1176.94	0	0.994	0.874183	1.15979	0.250344	12	1	7	1	0.447563	0.384466		0.276966	0.317896	0.593531	0.593531	4	13.1183	0.00239232	0.00354286	0.00105844	0.00692965	0.00721083	0.0039465	0.00339185	0.0442572		0.121705	0.0136279	1	1	0	0	0	0
20330	HAPLN1	HGNC:2380	ENSG00000145681	ENSGALG00000015627	ENSACAG00000011432	ENSNSUG00000004848	Avian	40.9	1176.94	0.0347511	0.177	0.909193	1.10346	0.304105	13	1	12	1	0.0384207	0.021877	0.205875		0.121127	0.298885	0.298885		5.48349	0.000866924	0.00441205	0.00102789	0.00182733	0.000435304	0.00252646	0.000852342	0.190576	0.234694	0.143905	0.00208593	0	0	0	0	0	0
20331	EDIL3	HGNC:3173	ENSG00000164176	ENSGALG00000015630	ENSACAG00000011454	ENSNSUG00000004852	Avian	0	1176.94	0	0.395	0.894538	-0.153248	0.106969	6		8	1	0.0442035	0.0506574	0.0997029	0.132204	0.123605	0.257442	0.257442		1.46086	0.00195632	0.00460723	0.0060448	0.0243462	0.0116805	0.0114946	0.00337931	0.004916	0.00242456	0.0289092	0.000488769	0	0	0	0	0	0
20332	COX7C	HGNC:2292	ENSG00000127184	ENSGALG00000027963	ENSACAG00000001016	ENSNSUG00000012795	Avian	0	1176.94	0	0.001	0.612742	0.539917	0.040625					0.226999	0.0560191		0.572715				345	120.66	0.016457	0.0226804	0.0210274	0.0210707	0.0154499	0.0277112	0.0173274	0.00324298	0.00826032		0.322515	0	0	0	0	0	0
20333	RASA1	HGNC:9871	ENSG00000145715	ENSGALG00000017706	ENSACAG00000000769	ENSNSUG00000004867	Avian	515.04	1176.94	0.437609	0.694	0.304921	1.08124	0.290351	18	1	14	1	0.0607345	0.0272693	0.113072	0.303648	0.111111	0.66749	0.66749	4.3	38.2396	0.041797	0.01943	0.0325549	0.0371139	0.0272262	0.0205764	0.0259043	0.0425068	0.0807911	0.374538	0.205657	0	0	0	0	0	0
20334	CCNH	HGNC:1594	ENSG00000134480	ENSGALG00000015641	ENSACAG00000000627	ENSNSUG00000005790	Avian	0	1176.94	0	0.702	-0.900845	0.715343	0.0103333					0.0548075	0.229733	0.13226	0.363839	0.290221	0.764198	0.764198	40.3	40.334	0.0667885	0.0315531	0.0189529	0.0398083	0.0168339	0.0201141	0.0204658	0.0474387	0.0234343	0.177718	0.264232	0	0	0	0	0	0
20335	TMEM161B	HGNC:28483	ENSG00000164180	ENSGALG00000010896	ENSACAG00000000583	ENSNSUG00000005819	Avian	209.6	1176.94	0.178089	0.266	0.31962	1.08957	0.1463	10	1	7	1	0.20688	0.110218	0.134057	0.370492	0.178138	0.747918	0.747918	7.3	19.6688	0.0429284	0.0255904	0.0260533	0.0380862	0.0197312	0.0209856	0.0253946	0.0570736	0.00239111	0.280006	0.072044	0	0	0	0	0	1
20336	MEF2C	HGNC:6996	ENSG00000081189	ENSGALG00000014645	ENSACAG00000000488	ENSNSUG00000005871	Avian	40.9	1176.94	0.0347511	0.973	-0.103275	-1.39306	0.21606	31	1	21	1	0.107008	0.148474	0.109069	0.32559	0.216542	0.449305	0.449305		0.136549	0.00717584	0.014252	0.0277455	0.0394914	0.0248263	0.0153163	0.00681936	0.00398975	0.00380808	0.12779	0.0604648	1	0	0	1	0	1
20337	CETN3	HGNC:1868	ENSG00000153140	ENSGALG00000014648	ENSACAG00000000119	ENSNSUG00000006108	Avian	0	1176.94	0	0.949	0.855259	1.02928	0.0189286			3	1	0.00974948	0.0750507	0.0296635	0.179438	0.293581	0.947202	0.947202	47.8	38.5049	0.354777	0.0125888	0.0369436	0.0170532	0.022901	0.0153273	0.0251696	0.107913	0.106523	0.256802	0.709444	0	0	0	0	0	0
20338	MBLAC2	HGNC:33711	ENSG00000176055	ENSGALG00000014649	ENSACAG00000013646	ENSNSUG00000006110	Avian	0	1176.94	0		-0.0315707	0.414677	0.187031	1	1	1	1	0.0418167	0.139184			0.350484	0.406533	0.406533	0.5	0.949731	0.0200592	0.0202047	0.0386946	0.028951	0.0268532	0.0209565	0.0249438	0.0379174	0.0184647	0.122602	0.0520971	0	0	0	0	0	0
20339	POLR3G	HGNC:30075	ENSG00000113356	ENSGALG00000014650		ENSNSUG00000006110	Avian	0	1176.94	0	0.265	0.478729	0.79895	0.191143					0.0686275				0.130489			25.6	0.0214991	0.0377291	0.0112834	0.0157542	0.0226806	0.0136027	0.0121756	0.0404774	0.0402634	0.00174891			0	0	0	0	0	0
20340	LYSMD3	HGNC:26969	ENSG00000176018	ENSGALG00000014651	ENSACAG00000013629	ENSNSUG00000006111	Avian	0	1176.94	0	0.213			0.199541	1				0.152593	0.384043	0.0970323		0.371675	0.462766	0.462766	6.2	14.3364	0.0149919	0.0298792	0.0317769	0.0438722	0.0274107	0.0214274	0.0189216	0.0191583	0.0971019	0.159514	0.166448	0	0	0	0	0	0
20341	ADGRV1	HGNC:17416	ENSG00000164199	ENSGALG00000032066	ENSACAG00000013431	ENSNSUG00000006121	Avian	0	1176.94	0		-0.511124	0.371628						0.204422	0.032725		0.169742		0.317857	0.317857			0.00701563	0.00129712	0.000335446	0.000277323	0.000303756	0.00022914	0.0017107	0.19172	0.0142257	0.0104119	0.0362657	1	0	0	1	0	0
20342	ARRDC3	HGNC:29263	ENSG00000113369	ENSGALG00000025915	ENSACAG00000013384	ENSNSUG00000006123	Avian	504.9	1176.94	0.428994	0.765	0.745041	1.00834	0.373806	30	1	29	1	0.0340795	0.0514541	0.0385816	0.21318		0.698231	0.698231	5.6	6.79097	0.011355	0.0168404	0.0270586	0.0482308	0.0107254	0.0129501	0.0370254	0.0392792	0.060944	0.294455	0.0503793	0	0	0	1	0	0
20343	NR2F1	HGNC:7975	ENSG00000175745	ENSGALG00000027907	ENSACAG00000013324	ENSNSUG00000006155	Avian	0	1176.94	0	0.749	0.402281	0.0333709		3		2		0.00278784	0.0467884	0.0286549	0.243362		0.331092	0.331092		0.652298	0.00617297	0.0718114	0.0672772	0.14628	0.0298926	0.00649085	0.0244131	0.00414477	0.0112925	0.0558279	0.734018	1	0	0	0	0	0
20344	FAM172A	HGNC:25365	ENSG00000113391	ENSGALG00000014661	ENSACAG00000013305	ENSNSUG00000006156	Avian	0	1176.94	0		-0.860307	0.359383	0.113852	5	1	2	1	0.0727395	0.0852594	0.098223	0.51834	0.519646	0.726524	0.726524	5.4	17.7155	0.016246	0.0326075	0.0280937	0.0293208	0.026774	0.0270441	0.0204101	0.0501513	0.263656	0.175266	0.105715	0	0	0	0	0	0
20345	KIAA0825	HGNC:28532	ENSG00000185261	ENSGALG00000014664	ENSACAG00000013284	ENSNSUG00000006158	Avian	0	1176.94	0				0.0405					0.308228	0.316484	0.332879	0.0625	0.473757	0.31228	0.31228		1.71184	0.0736775	0.0169828	0.0233157	0.00731436	0.0158483	0.0144622	0.0154857	0.060282	0.0137353	0.161251	0.173961	0	0	0	0	0	0
20346	SLF1	HGNC:25408	ENSG00000133302	ENSGALG00000027932	ENSACAG00000013255	ENSNSUG00000006180	Avian	0	1176.94	0		-1.24288	1.10694	0.0218158					0.231788	0.705133		0.183731		0.665322	0.665322	10.6	6.39269								0.0608686	0.0736951	0.375758	0.320575	0	0	0	0	0	0
20347	MCTP1	HGNC:26183	ENSG00000175471	ENSGALG00000014668	ENSACAG00000013190	ENSNSUG00000006182	Avian	0	1176.94	0	0.568	-0.0967682	1.4092	0.215632	5	1	2	1	0.0438217	0.135145	0.222276	0.15189	0.398097	0.279319	0.279319	1	0.778635	0.0115244	0.00879996	0.00369493	0.017171	0.015381	0.0096604	0.00944042	0.0375661	0.220596	0.00821334	0.0325422	0	0	0	0	0	0
20348	FAM81B	HGNC:26335	ENSG00000153347	ENSGALG00000044037	ENSACAG00000013172	ENSNSUG00000006197	Avian	0	1176.94	0	0.059	-0.652535	0.0382414	0.007					0.291763		0.122419	0.0862716		0.25	0.25	0.2	0.0067312	0.780419	0.00122355	0.00346068		0.00372229	0.00190998	0.00214382	0.453697			0.759821	0	0	0	0	0	0
20349	TTC37	HGNC:23639	ENSG00000198677	ENSGALG00000014670	ENSACAG00000013091	ENSNSUG00000006204	Avian	0	1176.94	0		-1.80044	0.200479	0.0439655					0.17196	0.228745	0.179334	0.558697	0.559548	0.819781	0.819781	2.2	10.5564	0.00626433	0.0310875	0.0283364	0.0332917	0.0236508	0.0241267	0.0230356	0.0269582	0.0433073	0.250858	0.0559268	0	0	0	1	0	0
20350	ARSK	HGNC:25239	ENSG00000164291	ENSGALG00000014672	ENSACAG00000013015	ENSNSUG00000007375	Avian	0	1176.94	0	0.04	-0.28961	-0.0202004	0.0394					0.204777	0.23487	0.223863	0.343594	0.406984	0.789196	0.789196	2.2	3.88819	0.0148761	0.0482434	0.0303757	0.0332838	0.0308888	0.0217097	0.0299025	0.0260156	0.0212593	0.118975	0.0929145	0	0	0	0	0	0
20351	RFESD	HGNC:29587	ENSG00000175449	ENSGALG00000014673	ENSACAG00000013011	ENSNSUG00000007379	Avian	0	1176.94	0	0.081	-0.0339147	-0.889523	0.02	1				0.135539	0.321687	0.133737		0.155314	0.466579	0.466579	3.2	0.14628	0.171711	0.0299985	0.0178121	0.00790025	0.0182585	0.0159577	0.0171313	0.002935	0.00579106	0.200807	0.11194	0	0	0	0	0	0
20352	RHOBTB3	HGNC:18757	ENSG00000164292	ENSGALG00000014675	ENSACAG00000012942	ENSNSUG00000007435	Avian	0	1176.94	0	0.186	-0.156816	0.0914048	0.0642222					0.0452207	0.119195	0.0970359	0.243446	0.246186	0.289425	0.289425	0.5	0.0874731	0.0134827	0.030459	0.0530416	0.0546811	0.00867432	0.0194412	0.00736698	0.023376	0.0278886	0.0335074	0.00283196	0	0	0	1	0	0
20353	GLRX	HGNC:4330	ENSG00000173221	ENSGALG00000027483	ENSACAG00000012936	ENSNSUG00000007437	Avian	0	1176.94	0	0.075	-0.461476	-0.139159	0.123929					0.111963		0.274137	0.333963		0.43288	0.43288	0.8	0.0327688	0.000952949	0.0109972	0.00339113	0.00463041	0.00584768	0.00735329	0.00901133	0.00597989	0.00896353	0.577528	0.0679919	0	0	0	0	0	0
20354	ELL2	HGNC:17064	ENSG00000118985	ENSGALG00000014678	ENSACAG00000012873	ENSNSUG00000007602	Avian	0	1176.94	0	0.387	0.328362	0.405163	0.285237	23	1	21	1	0.146806		0.124105	0.382128	0.135998	0.407731	0.407731	1.5	5.89146	0.0127788	0.0369207	0.0121018	0.0262533	0.00679928	0.0118367	0.034711	0.698707	0.312731	0.242529	0.057064	0	0	0	0	0	0
20355	PCSK1	HGNC:8743	ENSG00000175426	ENSGALG00000014681	ENSACAG00000012731	ENSNSUG00000007611	Avian	0	1176.94	0	0.29	0.0922389	0.597048	0.0830625	3	1	1		0.0826173	0.100141	0.114116		0.265583	0.284708	0.284708		1.16738	0.00307681	0.00249452	0.0018512	0.00218438	0.000893957	0.00387009	0.00373291	0.198522	0.00677537	0.00768211	0.00334965	0	0	0	0	0	0
20356	CAST	HGNC:1515	ENSG00000153113	ENSGALG00000014682	ENSACAG00000012586	ENSNSUG00000007613	Avian	0	1176.94	0	0.215	0.32983	0.269759	0.215158	2	1	2	1	0.354428	0.415677	0.24218	0.265738	0.389541	0.498527	0.498527	3.3	22.8919	0.0285364	0.0265498	0.0162907	0.02312	0.0218826	0.0273379	0.0684512	0.025742	0.102252	0.501477	0.114502	0	0	0	0	0	0
20357	ERAP1	HGNC:18173	ENSG00000164307	ENSGALG00000014684	ENSACAG00000012299	ENSNSUG00000007614	Avian	0	1176.94	0	0.09	-0.661445	0.619937	0.0265					0.164851		0.172015	0.166577	0.488646	0.549737	0.549737		8.72525	0.0119768	0.0223002	0.029379	0.0228101	0.0253925	0.0247252	0.022685	0.0508511	0.0267767	0.0814934	0.0404672	0	0	0	0	0	0
20358	LNPEP	HGNC:6656	ENSG00000113441	ENSGALG00000015301	ENSACAG00000012000	ENSNSUG00000007616	Avian	0	1176.94	0	0.071	-0.25318	1.30859	0.215771	8	1	11	1	0.162375	0.18904	0.241051	0.241493	0.327097	0.498802	0.498802	1.4	16.7756	0.0129608	0.0281062	0.0238991	0.0457429	0.0258024	0.032393	0.0227055	0.0680103	0.0221705	0.241095	0.115478	0	0	0	0	0	0
20359	LIX1	HGNC:18581	ENSG00000145721	ENSGALG00000015290	ENSACAG00000011917	ENSNSUG00000007870	Avian	0	1176.94	0	0.155	-0.441482	0.184065	0.0245588					0.0636733		0.0451965		0.1608				0.293636	0.00272132	0.00695733	0.0015256	0.00134	0.00125631	0.00466088	0.00163544	0.0949516			0.677832	0	0	0	0	0	0
20360	RIOK2	HGNC:18999	ENSG00000058729	ENSGALG00000015288	ENSACAG00000011858	ENSNSUG00000007871	Avian	0	1176.94	0	0.592	-1.50959	-2.25665	0.0190625						0.306773	0.161637	0.492842	0.522402	0.604684	0.604684	40.9	87.4224	0.0359358	0.0260731	0.0331564	0.0340825	0.0269214	0.0267703	0.0247797	0.0645219	0.314377	0.212526	0.113024	0	0	0	0	0	0
20361	RGMB	HGNC:26896	ENSG00000174136	ENSGALG00000015284	ENSACAG00000011827	ENSNSUG00000007882	Avian	138.9	1176.94	0.118018	0.129			0.203556	8	1	10	1	0.129163	0.280094	0.103602	0.250265	0.49095	0.460816	0.460816	2.9	2.62582	0.0264684	0.0370307	0.0339925	0.0335488	0.0127496	0.0187206	0.0174721	0.0175313	0.0493854	0.314438	0.179181	0	0	0	0	0	0
20362	CHD1	HGNC:1915	ENSG00000153922	ENSGALG00000014642	ENSACAG00000011210	ENSNSUG00000007884	Avian	561.04	1176.94	0.476694	0.815	0.997554	0.428657	0.39564	19	1	10	1	0.0257984	0.036556	0.0713678	0.346746	0.27544	0.426407	0.426407	12.2	36.305	0.0392479	0.0267173	0.041681	0.0725913	0.0303552	0.0290533	0.024793	0.349324	0.0606613	0.165156	0.0676511	1	0	0	0	0	0
20363	FAM174A	HGNC:24943	ENSG00000174132	ENSGALG00000026203	ENSACAG00000004457	ENSNSUG00000009521	Avian	0	1176.94	0		-0.154358	0.719036	0.159333			1	1	0.345876	0.269865	0.551839	0.440872		0.628845	0.628845	6.5	14.9514	0.0599836	0.0256867	0.0150314	0.0122181	0.0170072	0.0180554	0.0254115	0.0254564	0.0984654	0.202476	0.62948	0	0	0	1	0	0
20364	ST8SIA4	HGNC:10871	ENSG00000113532	ENSGALG00000026192	ENSACAG00000004472	ENSNSUG00000009522	Avian	0	1176.94	0	0.136	0.107217	0.891244	0.260514	7	1	4	1	0.0316767	0.0611987	0.0776617	0.10433		0.253318	0.253318	0.1	1.17266	0.0030348	0.0139954	0.00807828	0.0331328	0.0113478	0.00843802	0.0207918	0.0313243	0.040534	0.0130996	0.0394153	0	0	0	0	0	0
20365	SLCO4C1	HGNC:23612	ENSG00000173930	ENSGALG00000026768		ENSNSUG00000009523	Avian	0	1176.94	0	0.229	-2.62354	-0.776243	0.0165238					0.168017					0.273909	0.273909	10.1	0.031137	0.0236668	0.00760663	0.0100054	0.0101734	0.00752138	0.00529587	0.00600508	0.0864038	0.0241544	0.912713	0.00773723	0	0	0	0	0	0
20366	PAM	HGNC:8596	ENSG00000145730	ENSGALG00000015256	ENSACAG00000006978	ENSNSUG00000009542	Avian	0	1176.94	0	0.481	-0.0841317	0.488958	0.180591	11	1	10	1	0.0998304	0.153549	0.154521	0.440515	0.361479	0.364459	0.364459	0.5	15.1289	0.00239908	0.0145657	0.0196126	0.016146	0.0155871	0.0149247	0.0124773	0.016952	0.0762552	0.109437	0.10833	0	0	0	1	0	0
20367	GIN1	HGNC:25959	ENSG00000145723	ENSGALG00000015257	ENSACAG00000007110	ENSNSUG00000009542	Avian	0	1176.94	0	0.121	-0.143273	0.32891	0.02735					0.125858	0.197045		0.235155	0.308242			3.9	2.56084	0.0394066	0.0233959	0.02483	0.0431876	0.0223284	0.0250092	0.0192938	0.124646	0.113703			0	0	0	0	0	0
20368	PPIP5K2	HGNC:29035	ENSG00000145725	ENSGALG00000015264	ENSACAG00000007146	ENSNSUG00000012501	Avian	0	1176.94	0		0.398435	-0.136213	0.142387					0.0507793	0.0281393	0.0536335	0.276436	0.292745	0.542998	0.542998	3.9	17.6567	0.0197383	0.0215193	0.033648	0.0368748	0.0265369	0.019141	0.023488	0.0840708	0.0208723	0.188697	0.0959302	1	0	0	1	0	0
20369	MACIR	HGNC:25052	ENSG00000181751	ENSGALG00000027512	ENSACAG00000006723	ENSNSUG00000012515	Avian	255.94	1176.94	0.217462	0.265	0.0344409	0.425616	0.26075	4	1	8	1	0.0551373	0.18541	0.0991811	0.0625		0.309246	0.309246	1.5	10.3763	0.0182412	0.0091531	0.0112632	0.0053961	0.007938	0.0103161	0.00940359	0.0491094	0.137227	0.0707335	0.0582428	0	0	0	0	0	0
20370	NUDT12	HGNC:18826	ENSG00000112874	ENSGALG00000015268	ENSACAG00000006752	ENSNSUG00000012521	Avian	0	1176.94	0	0.068	0.570208	-0.133454	0.0134348					0.101281	0.212928	0.22282	0.407861	0.330307	0.822092	0.822092	0.8	3.8161	0.0172591	0.0261927	0.0150431	0.0153769	0.0159984	0.0206753	0.0168801	0.0211361	0.0589859	0.304102	0.0614118	0	0	0	0	0	0
20371	EFNA5	HGNC:3225	ENSG00000184349	ENSGALG00000000280	ENSACAG00000006783	ENSNSUG00000012522	Avian	40.9	1176.94	0.0347511	0.29	0.481835	0.78789	0.213318	27	1	22	1	0.0304646	0.0603345	0.0891619	0.277038	0.43813	0.413652	0.413652	0.3	19.8053	0.00925924	0.0228145	0.0269223	0.0131072	0.00352931	0.0277474	0.0536243	0.0314234	0.0769967	0.604372	0.0557288	0	0	0	0	0	0
20372	FBXL17	HGNC:13615	ENSG00000145743	ENSGALG00000000276	ENSACAG00000006821	ENSNSUG00000012538	Avian	0	1176.94	0	0.531	0.629412	0.857341	0.230778	3	1	5	1	0.087399	0.0529454		0.261922	0.569401	0.7455	0.7455		17.0077	0.0201764	0.0193951	0.0168436	0.0232079	0.0204095	0.0203725	0.0163695	0.0853163	0.0133347	0.307659	0.15676	0	0	0	1	0	0
20373	FER	HGNC:3655	ENSG00000151422	ENSGALG00000000273	ENSACAG00000006839	ENSNSUG00000012540	Avian	0	1176.94	0	0.094	-0.216704	0.915762	0.0674259	3		5	1	0.0684796	0.0928118		0.216064	0.458573	0.545162	0.545162	6	9.64838	0.10553	0.0228657	0.0229314	0.0538408	0.0313432	0.0337022	0.0211088	0.0186452	0.00902155	0.458579	0.0497363	0	0	0	1	0	0
20374	PJA2	HGNC:17481	ENSG00000198961	ENSGALG00000000264	ENSACAG00000006938	ENSNSUG00000012541	Avian	0	1185.24	0	0.273	-0.160629	-1.59481	0.142238					0.176828	0.385356	0.180324	0.0625	0.355658	0.590166	0.590166	10	2.14994	0.0191683	0.0251594	0.0217418	0.0520281	0.0273609	0.0314966	0.0145068	0.0998849	0.0990634	0.170794	0.0836206	0	0	0	0	0	0
20375	MAN2A1	HGNC:6824	ENSG00000112893	ENSGALG00000000255	ENSACAG00000006965	ENSNSUG00000012542	Avian	0	1185.24	0	0.398	0.225151	0.396466	0.248071	15	1	11	1	0.185554	0.124581	0.129027	0.285563	0.510332	0.483986	0.483986	5.6	43.6294	0.0287878	0.0160143	0.0236577	0.0259962	0.0283311	0.0228897	0.0214855	0.0243073	0.0242336	0.31402	0.070952	0	0	0	0	0	0
20376	TMEM232	HGNC:37270	ENSG00000186952		ENSACAG00000007083	ENSNSUG00000018382	Avian	0	1185.24	0				0.0175					0.332133			0.0812071		0.452968	0.452968			0.398457	0.010246	0.0123391		0.00878869	0.015573	0.00730711			0.158196	0.769456	0	0	0	0	0	0
20377	SLC25A46	HGNC:25198	ENSG00000164209	ENSGALG00000000253	ENSACAG00000007092	ENSNSUG00000012544	Avian	0	1185.24	0	0.155	0.0362206	0.880534	0.0155758					0.140704	0.0935335	0.0899941	0.474184	0.608413	0.662704	0.662704	13.8	13.4094	0.0372719	0.0220002	0.0198153	0.0303441	0.0258977	0.0266083	0.0244513	0.0134379	0.0204333	0.297489	0.0633144	0	0	0	0	0	0
20378	WDR36	HGNC:30696	ENSG00000134987	ENSGALG00000000247	ENSACAG00000007141	ENSNSUG00000012545	Avian	0	1185.24	0	0.093	-2.62354	-2.53125	0.00496					0.126015	0.223014	0.159855	0.327772	0.418488	0.496073	0.496073	12.5	127.166	0.0306494	0.027419	0.0381499	0.0334568	0.0308026	0.0231013	0.0300366	0.051977	0.0732394	0.1264	0.132853	0	0	0	1	0	0
20379	CAMK4	HGNC:1464	ENSG00000152495	ENSGALG00000000244	ENSACAG00000007256	ENSNSUG00000013141	Avian	0	1185.24	0	0.153	-0.571679	0.689138	0.129172	2	1	2	1	0.252176	0.0538805	0.110794	0.177774	0.158328	0.259639	0.259639		1.28958	0.169628	0.0079995	0.00304246	0.00217546	0.00249213	0.00289534	0.00331953	0.0476674	0.00504278	0.0251538	0.0176858	0	0	0	1	0	0
20380	STARD4	HGNC:18058	ENSG00000164211	ENSGALG00000000241	ENSACAG00000007330	ENSNSUG00000013142	Avian	0	1185.24	0	0.109	-0.538489	0.67871	0.0208788			1	1	0.104366	0.144287	0.151545	0.139646	0.394523	0.523298	0.523298		6.44236	0.00718769	0.0313816	0.0107495	0.00960281	0.0115415	0.0051065	0.0209981	0.00824039	0.00492272	0.044584	0.0457292	0	0	0	0	0	0
20381	NREP	HGNC:16834	ENSG00000134986	ENSGALG00000027891		ENSNSUG00000004106	Avian	0	1185.24	0		-0.383286	0.489767	0.3254	24	1	24	1	0.503029	0.390239		0.38228				0.9	16.9857	0.00714525	0.0184581	0.0173759	0.0192479	0.018087	0.0103871	0.00683084	0.00798615	0.00306903			0	0	0	1	0	0
20382	EPB41L4A	HGNC:13278	ENSG00000129595	ENSGALG00000000234	ENSACAG00000007361	ENSNSUG00000013148	Avian	0	1185.24	0	0.105	-1.47511	-0.962853	0.174435					0.0610288	0.112399	0.102527	0.338316	0.239933	0.578859	0.578859	4.3	1.40439	0.0172699	0.017239	0.0152483	0.0106494	0.0171528	0.00855882	0.0815183	0.130114	0.0618254	0.325249	0.0430168	0	1	0	0	0	0
20383	APC	HGNC:583	ENSG00000134982	ENSGALG00000000220	ENSACAG00000007490	ENSNSUG00000013150	Avian	181	1185.24	0.152712	0.467	0.648825	-0.0233326	0.226512	13	1	5		0.088699	0.0932856			0.171713	0.429945	0.429945	3.2	13.078	0.0112595	0.0101617	0.0120051	0.0229035	0.0152419	0.0150255	0.0151157	0.167359	0.0327803	0.217045	0.0528347	0	0	0	0	0	0
20384	SRP19	HGNC:11300	ENSG00000153037	ENSGALG00000000218	ENSACAG00000007550	ENSNSUG00000013151	Avian	0	1185.24	0	0.08	0.217065	0.0342134	0.0648214			3	1	0.0298282	0.018986	0.0409589	0.479919	0.805677	0.743075	0.743075	100.8	132.351	0.0255703	0.0387277	0.0163903	0.0202909	0.0241929	0.0237219	0.0253606	0.0333795	0.10843	0.248051	0.392604	0	0	0	0	0	0
20385	REEP5	HGNC:30077	ENSG00000129625	ENSGALG00000023157	ENSACAG00000007552	ENSNSUG00000013152	Avian	0	1185.24	0	0.239	0.353906	0.013555	0.019	8	1	5	1	0.0500835	0.049118	0.120678	0.500102	0.526126	0.523874	0.523874	32.4	22.4306	0.012883	0.0241735	0.017333	0.0294338	0.0173638	0.0146143	0.0173904	0.0171548	0.0333897	0.157741	0.0681499	0	0	0	0	0	0
20386	DCP2	HGNC:24452	ENSG00000172795	ENSGALG00000000215	ENSACAG00000007587	ENSNSUG00000013153	Avian	0	1185.24	0	0.379	-1.31842	0.556792	0.271269	4	1	7	1	0.0819144	0.253829	0.109666	0.226804	0.464559	0.353925	0.353925	12.7	29.6203	0.0236995	0.0204623	0.0281871	0.0420151	0.0198786	0.0169061	0.0204283	0.0252544	0.148686	0.176495	0.111574	0	0	0	0	0	0
20387	MCC	HGNC:6935	ENSG00000171444	ENSGALG00000000208	ENSACAG00000007653	ENSNSUG00000013232	Avian	0	1185.24	0	0.661	-0.881608	0.389295	0.118683	5	1	8	1	0.0369061	0.0420741	0.0262914	0.19916	0.42842	0.332713	0.332713	1.8	5.89095	0.0147388	0.045793	0.111865	0.0840424	0.0290979	0.00693667	0.0374153	0.0641272	0.175256	0.751399	0.112869	0	0	0	0	0	0
20388	YTHDC2	HGNC:24721	ENSG00000047188	ENSGALG00000000189	ENSACAG00000007754	ENSNSUG00000013233	Avian	0	1185.24	0	0.321	-0.0504807	-2.53125	0.135929					0.0335487	0.19191		0.508303	0.493976	0.474138	0.474138	2	14.6023	0.0444024	0.0230712	0.0323759	0.0524091	0.0268489	0.0228541	0.0295718	0.0365029	0.0320773	0.235694	0.101051	0	0	0	0	0	0
20389	KCNN2	HGNC:6291	ENSG00000080709	ENSGALG00000002539	ENSACAG00000007809	ENSNSUG00000013234	Avian	0	1185.24	0	0.763	0.779468	1.0149	0.2075	4		7	1	0.0177729	0.12303	0.0387205	0.290921	0.248331	0.259703	0.259703	1.2	1.55382	0.0233631	0.0685363	0.00463611	0.0105682	0.0104783	0.00798791	0.00740629	0.211239	0.031167	0.022839	0.118423	0	0	0	0	0	0
20390	TRIM36	HGNC:16280	ENSG00000152503	ENSGALG00000008188	ENSACAG00000007939	ENSNSUG00000013235	Avian	0	1185.24	0	0.431	0.864693	0.719596	0.133375	3	1	5	1	0.0610943	0.166564	0.170117	0.0675262	0.12414	0.68258	0.68258	2	2.09512	0.430452	0.0461936	0.0125171	0.000721707	0.00111528	0.00169038	0.00291734	0.477243	0.11507	0.066592	0.0805381	0	0	0	0	0	0
20391	PGGT1B	HGNC:8895	ENSG00000164219	ENSGALG00000008197	ENSACAG00000007988	ENSNSUG00000013245	Avian	111.7	1185.24	0.0942425	0.482	0.129147	0.583281	0.222118	2	1	3	1	0.0444039	0.149569	0.102748	0.223437	0.430879	0.588097	0.588097	10.6	26.2296	0.0231253	0.0230092	0.0243338	0.0236365	0.0249856	0.0240609	0.0379736	0.0718778	0.0499967	0.254991	0.195886	0	0	0	1	0	0
20392	CCDC112	HGNC:28599	ENSG00000164221	ENSGALG00000045092	ENSACAG00000008012	ENSNSUG00000013247	Avian	0	1185.24	0	0.227	0.15895	0.9574	0.0115					0.097561	0.565994	0.149622	0.118348		0.468441	0.468441	3.2	2.44604	0.161012	0.0176984	0.0153123	0.0249173	0.0246597	0.0210652	0.0170223	0.358546	0.131224	0.091673	0.504411	0	0	0	1	0	0
20393	FEM1C	HGNC:16933	ENSG00000145780	ENSGALG00000008204	ENSACAG00000008023	ENSNSUG00000013249	Avian	510.9	1185.24	0.431052	0.578	-0.0495177	0.679547	0.264275	11	1	11	1	0.00610772	0.0592906	0.0304756	0.0625	0.441381	0.732088	0.732088	3.8	7.23469	0.0281935	0.0271183	0.0180501	0.0661552	0.0218724	0.0236793	0.0177775	0.0217834	0.072653	0.299939	0.116194	0	0	0	1	0	1
20394	TMED7	HGNC:24253	ENSG00000134970	ENSGALG00000028484		ENSNSUG00000013252	Avian	258.04	1185.24	0.217711		-0.308563	0.251847	0.0654035	2	1			0.0470559			0.0777829				23.4	187.23	0.0129423	0.0358957	0.0235737	0.0265554	0.0328887	0.0244769	0.0223449	0.0148638	0.0128937		0.0925077	0	0	0	0	0	1
20395	TICAM2	HGNC:21354	ENSG00000243414		ENSACAG00000028497	ENSNSUG00000003702	Avian	0	1185.24	0		-0.110221	0.0444307	0.0800625					0.223207									0.0102715	0.025621	0.0281783	0.0337502	0.0298023	0.0205806	0.0204208				0.0558092	0	0	0	0	0	0
20396	CDO1	HGNC:1795	ENSG00000129596	ENSGALG00000002358	ENSACAG00000008057	ENSNSUG00000013254	Avian	0	1185.24	0	0.211	0.421006	1.1692	0.0145					0.08221	0.0816252	0.0882865	0.196347	0.300544	0.474739	0.474739	2.7	10.0674	0.0115917	0.00465717	0.0147578	0.0248468	0.00437265	0.00417087	0.00221785	0.0180336	0.000601755	0.231088	0.00124628	0	0	0	1	0	0
20397	ATG12	HGNC:588	ENSG00000145782	ENSGALG00000002345	ENSACAG00000008076	ENSNSUG00000013255	Avian	0	1185.24	0	0.088	0.00219456	0.478308	0.0194737					0.111234	0.0784524	0.183039	0.477238	0.343282	0.679256	0.679256	33.3	43.8576	0.0195497	0.0230724	0.027761	0.0286887	0.0233592	0.022408	0.0214233	0.0367154	0.0492304	0.315842	0.433135	0	0	0	0	0	0
20398	AP3S1	HGNC:2013	ENSG00000177879	ENSGALG00000002341	ENSACAG00000028530	ENSNSUG00000013256	Avian	98	1185.24	0.0826837	0.482	-0.773219	-1.6122	0.258556	5	1					0.00544895	0.491512	0.513759	0.723846	0.723846	78.1	113.051	0.0255747	0.0186248	0.025858	0.0357822	0.0261442	0.0203391	0.0231199	0.0332691	0.0193559	0.224276	0.20027	0	0	0	0	0	0
20399	LVRN	HGNC:26904	ENSG00000172901	ENSGALG00000002318	ENSACAG00000008112	ENSNSUG00000013259	Avian	0	1185.24	0		1.09513	-2.53125						0.429828	0.384324	0.495553	0.0688131	0.391383	0.345914	0.345914		2.7508	0.0437318	0.00166323	0.0283449	0.00951395	0.00205322	0.0143328	0.00408753	0.0322006		0.0994168	0.0273408	1	0	0	0	0	0
20400	ARL14EPL	HGNC:44201	ENSG00000268223	ENSGALG00000053928		ENSNSUG00000013302	Avian	0	1185.24	0				0.0647647					0.0811982	0.483242								0.232716			0.0724279								0	0	0	0	0	0
20401	COMMD10	HGNC:30201	ENSG00000145781	ENSGALG00000002308	ENSACAG00000008166	ENSNSUG00000013304	Avian	0	1185.24	0	0.201			0.0279167	1				0.101486	0.350804	0.228189	0.590599	0.392578	0.395503	0.395503	17.9	35.6196	0.0127844	0.0343408	0.0203573	0.0196601	0.0228876	0.0247343	0.020724	0.0285469	0.0703507	0.169472	0.0571272	0	0	0	0	0	0
20402	SEMA6A	HGNC:10738	ENSG00000092421	ENSGALG00000002294	ENSACAG00000008169	ENSNSUG00000013310	Avian	0	1185.24	0	0.463	0.794912	0.712781	0.27097	25	1	10	1	0.0547001	0.0677344	0.0588768	0.169591	0.426354	0.354423	0.354423	7.8	18.2574	0.0151738	0.00943195	0.0160467	0.0460504	0.0145084	0.0271996	0.0108493	0.0250542	0.0139872	0.0934755	0.0486786	1	0	0	0	0	0
20403	DTWD2	HGNC:19334	ENSG00000169570	ENSGALG00000002250	ENSACAG00000004172	ENSNSUG00000013522	Avian	0	1185.24	0	0.139	-1.65491	-0.896273	0.0529375					0.273687	0.0994443	0.136714	0.209742	0.367002	0.415128	0.415128	1	6.28819	0.034425	0.0184845	0.0128434	0.0163067	0.0202501	0.01045	0.0197337	0.021013	0.0153017	0.157861	0.206146	0	0	0	0	0	0
20404	DMXL1	HGNC:2937	ENSG00000172869	ENSGALG00000002227	ENSACAG00000004113	ENSNSUG00000013525	Avian	0	1185.24	0	0.631	0.762692	-0.616136	0.233706	5	1	4	1	0.128049	0.139691	0.134128	0.317245	0.409268	0.594148	0.594148	2.3	4.76635	0.0200313	0.0575351	0.0287561	0.0460209	0.027459	0.0261381	0.0242824	0.027325	0.00536565	0.168977	0.0905425	0	1	0	1	0	0
20405	TNFAIP8	HGNC:17260	ENSG00000145779	ENSGALG00000027761	ENSACAG00000003983	ENSNSUG00000013549	Avian	0	1185.24	0	0.396			0.145067	2		3	1	0.0824011	0.025	0.125784	0.152824		0.38612	0.38612	1.6	8.89428	0.00708094	0.0366126	0.00669231	0.0135411	0.0313328	0.0148486	0.0466276	0.0196148	0.192624	0.647467	0.143093	0	0	0	0	0	0
20406	HSD17B4	HGNC:5213	ENSG00000133835	ENSGALG00000002187	ENSACAG00000003796	ENSNSUG00000013550	Avian	0	1185.24	0	0.585	-2.62354	-2.53125						0.165632	0.170063	0.129963	0.213247	0.262436	0.260492	0.260492	1.7	18.4459	0.0104486	0.0207402	0.0148653	0.00993469	0.015753	0.0118967	0.0221749	0.0273674	0.00930169	0.959724	0.0537341	0	0	0	0	1	0
20407	PRR16	HGNC:29654	ENSG00000184838	ENSGALG00000002183	ENSACAG00000003793	ENSNSUG00000013553	Avian	0	1185.24	0	0.148	-0.0103358	0.411953	0.330889	4	1	4	1	0.123338	0.144361	0.136353	0.217517	0.269901	0.345774	0.345774	0.5	0.0138791	0.0286632	0.046179	0.0134575	0.0669194	0.0395503	0.0138602	0.0271617	0.0177385	0.0658909	0.218068	0.234759	0	0	0	0	0	0
20408	SRFBP1	HGNC:26333	ENSG00000151304	ENSGALG00000005316	ENSACAG00000003779	ENSNSUG00000013554	Avian	0	1185.24	0	0.084	-0.246826	0.28783	0.0172115					0.293071	0.349124	0.301413	0.420358	0.601691	0.666234	0.666234	18.8	25.303	0.0329281	0.0328874	0.0304467	0.0312422	0.0297154	0.0273337	0.0353466	0.0618776	0.0930992	0.229677	0.124442	0	0	0	0	0	0
20409	LOX	HGNC:6664	ENSG00000113083	ENSGALG00000028063	ENSACAG00000003698	ENSNSUG00000011826	Avian	49.2	1185.24	0.0415106	0.35	-0.0139954	0.484464	0.220343	3	1			0.0858049	0.109307	0.0236362	0.197353		0.40102	0.40102		1.23559	0.00769182	0.0228462	0.0159422	0.0795381	0.018539	0.0102062	0.0153859	0.0086792	0.00715136	0.62341	0.144684	0	0	0	0	0	0
20410	ZNF474	HGNC:23245	ENSG00000164185		ENSACAG00000003682	ENSNSUG00000013558	Avian	0	1185.24	0	0.091			0.0804					0.418586					0.295317				0.496164	0.0226773	0.02297		0.0268251	0.0264328	0.0248692					0	0	0	0	0	0
20411	SNCAIP	HGNC:11139	ENSG00000064692	ENSGALG00000005330	ENSACAG00000023071	ENSNSUG00000013559	Avian	0	1185.24	0	0.249	0.342977	0.717312	0.282	9		8	1	0.149981	0.152884		0.110776	0.239987	0.345353	0.345353	0.2	3.15572	0.069777	0.0302914	0.0877391	0.0181552	0.0647118	0.00545779	0.0242717	0.101439	0.207639	0.0932295	0.155383	1	0	0	1	0	0
20412	SNX2	HGNC:11173	ENSG00000205302	ENSGALG00000005337	ENSACAG00000003451	ENSNSUG00000013561	Avian	132.04	1185.24	0.111404	0.285	-0.0808569	1.15337	0.166079	12	1	9	1	0.0282258	0.156451	0.07109	0.327767	0.432735	0.497205	0.497205	41.6	66.3839	0.0251757	0.0299766	0.0317296	0.024479	0.0250697	0.0303182	0.0225485	0.0159522	0.0511782	0.222804	0.0558497	0	0	0	0	0	0
20413	SNX24	HGNC:21533	ENSG00000064652	ENSGALG00000018874	ENSACAG00000003449	ENSNSUG00000013562	Avian	0	1185.24	0	0.165	0.345143	0.70914	0.0933721	1	1			0.0385802	0.0293061	0.0857378	0.335329	0.29066			48	44.1406	0.0319926	0.0133577	0.0127246	0.0110532	0.0134289	0.0128963	0.0341285	0.0198411	0.00483941		0.058642	0	0	0	0	0	0
20414	PPIC	HGNC:9256	ENSG00000168938	ENSGALG00000005346	ENSACAG00000003427	ENSNSUG00000013563	Avian	0	1185.24	0	0.115	-0.0791512	0.432235	0.0576667					0.0944144	0.118591	0.159874	0.446366	0.466506	0.651456	0.651456	14.6	10.7004	0.0128719	0.0287214	0.017635	0.0123837	0.0277362	0.0269685	0.0281916	0.0167243	0.0388697	0.100809	0.178545	0	0	0	0	0	0
20415	PRDM6	HGNC:9350	ENSG00000061455	ENSGALG00000005351	ENSACAG00000003401	ENSNSUG00000013564	Avian	0	1185.24	0	0.292			0.0950377	11	1	9	1	0.064642	0.135459	0.144189	0.0871366	0.219689				0.146337	0.00620357	0.0380194	0.0325083	0.0169173	0.0084403	0.101584	0.00388285		0.0145003		0.0595521	0	1	0	0	0	0
20416	CEP120	HGNC:26690	ENSG00000168944	ENSGALG00000005368	ENSACAG00000003259	ENSNSUG00000013566	Avian	0	1185.24	0		1.1373	0.956005	0.0381	4	1			0.0843895	0.288061		0.159947	0.292594	0.639849	0.639849	1	10.935	0.0509859	0.0290018	0.0486578	0.0632689	0.0350127	0.0300864	0.0191973	0.130805	0.172986	0.0972017	0.110588	0	0	0	1	0	0
20417	ZNF608	HGNC:29238	ENSG00000168916	ENSGALG00000005016	ENSACAG00000003135	ENSNSUG00000013786	Avian	0	1185.24	0	0.156	0.684713	0.252497	0.230647	13		13	1	0.0955515	0.165994	0.107134	0.338097	0.425097	0.501966	0.501966	1.2	4.76971	0.0505107	0.0150194	0.0208059	0.0194832	0.0156366	0.0219118	0.0146312	0.0549712	0.0325494	0.0891438	0.0963836	0	0	0	0	0	0
20418	GRAMD2B	HGNC:24911	ENSG00000155324	ENSGALG00000008237	ENSACAG00000003047	ENSNSUG00000013788	Avian	0	1185.24	0	0.1	-0.870463	-0.0945071	0.205625					0.216318	0.180276	0.211942	0.336802	0.520866	0.607607	0.607607	0.4	4.17094	0.00472478	0.0228032	0.0242217	0.139219	0.025356	0.011284	0.0127278	0.0613429	0.0419716	0.397378	0.0127016	0	0	0	0	0	0
20419	ALDH7A1	HGNC:877	ENSG00000164904	ENSGALG00000008229	ENSACAG00000002899	ENSNSUG00000013789	Avian	0	1185.24	0	0.378	0.595081	0.359537	0.0160357					0.13162	0.13753	0.0966708	0.243991	0.367565	0.811009	0.811009	2.6	89.9882	0.0127799	0.0275168	0.0395566	0.0267928	0.0240365	0.0131472	0.0341529	0.00558031	0.0174132	0.261448	0.106757	0	0	0	0	0	0
20420	PHAX	HGNC:10241	ENSG00000164902	ENSGALG00000014691	ENSACAG00000002878	ENSNSUG00000013790	Avian	0	1185.24	0		-0.545444	-0.214023	0.106364			4	1	0.0791303	0.078703	0.143318	0.506827	0.640483	0.878808	0.878808	72.8	106.764	0.0232578	0.0260017	0.0279413	0.0396593	0.0293579	0.0255897	0.0238734	0.0507527	0.133607	0.281758	0.076199	0	0	0	1	0	0
20421	TEX43	HGNC:33767	ENSG00000196900		ENSACAG00000002875	ENSNSUG00000008097	Avian	0	1185.24	0		-0.257588	-0.0175872						0.23323		0.168166	0.0625						0.887778											0	0	0	0	0	0
20422	LMNB1	HGNC:6637	ENSG00000113368	ENSGALG00000014692	ENSACAG00000002780	ENSNSUG00000013792	Avian	0	1185.24	0	0.919	0.256274	0.350211	0.147818	6	1	2	1	0.0294957	0.140755	0.0783765	0.17435	0.375799	0.663719	0.663719	28.2	59.8507	0.0603856	0.00728407	0.016034	0.0269638	0.00762741	0.00623639	0.0531457	0.112697	0.113079	0.326063	0.133381	0	0	0	0	0	0
20423	MARCHF3	HGNC:28728	ENSG00000173926	ENSGALG00000028673	ENSACAG00000002759	ENSNSUG00000013793	Avian	0	1185.24	0	0.681	0.278836	0.29485	0.257964	1	1	8	1	0.133835	0.0765261	0.0626876	0.335813		0.535239	0.535239	1.1	0.766683	0.110538	0.0062645	0.00983889	0.0135069	0.0153872	0.0134864	0.0076241	0.594244	0.0145888	0.303503	0.58935	0	0	0	1	0	0
20424	C5orf63	HGNC:40051	ENSG00000164241	ENSGALG00000028135	ENSACAG00000002752	ENSNSUG00000000038	Avian	0	1185.24	0				0.013					0.68668	0.173692	0.292777			0.326759	0.326759	4.6	4.84061	0.085037	0.0198212	0.0186697	0.00417506	0.0208919	0.0107606	0.0263713	0.0145985	0.0245448	0.76509	0.674986	0	0	0	0	0	0
20425	MEGF10	HGNC:29634	ENSG00000145794	ENSGALG00000014699	ENSACAG00000002614	ENSNSUG00000013796	Avian	0	1185.24	0	0.075	0.217282	-0.61836	0.025875	4	1	2	1	0.0478485	0.0416833	0.0816427		0.436668	0.270241	0.270241		0.0287911	0.00568567	0.00253193	0.000781987	0.00127067	0.00652045	0.00291555	0.0011468	0.0394465	0.00843156	0.0297881	0.000814035	0	0	0	0	0	0
20426	PRRC1	HGNC:28164	ENSG00000164244	ENSGALG00000014703	ENSACAG00000012694	ENSNSUG00000010671	Avian	0	1185.24	0	0.1	0.1974	-0.675345	0.130682	2	1	1	1	0.105816	0.23887	0.19032	0.387573	0.618338	0.312036	0.312036	17.6	45.2256	0.0192477	0.0286362	0.0280045	0.0226452	0.0324669	0.018923	0.0297936	0.0437516	0.0742535	0.0656339	0.0218142	0	0	0	0	0	0
20427	CTXN3	HGNC:31110	ENSG00000205279	ENSGALG00000029034	ENSACAG00000002612	ENSNSUG00000013797	Avian	0	1185.24	0	0.524	0.439317	0.764578	0.0578333					0.0822502		0.265347	0.0648384						0.00303585	0.000498331	0.0003929			0.000495401	0.000636798					0	0	0	1	0	0
20428	SLC12A2	HGNC:10911	ENSG00000064651	ENSGALG00000014690	ENSACAG00000002415	ENSNSUG00000013798	Avian	0	1185.24	0	0.185	0.987357	0.391081	0.24228	23	1	16	1	0.0711744	0.0765509	0.0970963	0.388796	0.235548	0.443485	0.443485	2.2	27.2657	0.0223428	0.0295881	0.0138885	0.0119988	0.0138902	0.0215262	0.00870675	0.0793365	0.143113	0.0171526	0.0026824	0	0	0	0	0	0
20429	FBN2	HGNC:3604	ENSG00000138829	ENSGALG00000014686	ENSACAG00000001711	ENSNSUG00000013802	Avian	0	1185.24	0	0.625	-0.569219	1.8515	0.287125	19	1	16	1	0.0249964	0.0914915	0.0560989	0.187667	0.219943				2.61625	0.222582	0.0295474	0.0173597	0.0144466	0.08243	0.00963144	0.0211227				0.0934762	1	1	0	0	0	0
20430	SLC27A6	HGNC:11000	ENSG00000113396	ENSGALG00000000184	ENSACAG00000001614	ENSNSUG00000002790	Avian	0	1185.24	0	0.046	0.368905	-0.428386						0.227441	0.142786		0.0831464	0.189582			0.8	1.23765	0.0772389	0.0165467	0.0544987	0.00201398	0.00308768	0.00288252	0.0257445	0.0517451	0.0317269			0	0	0	0	0	0
20431	ISOC1	HGNC:24254	ENSG00000066583	ENSGALG00000000161	ENSACAG00000001578	ENSNSUG00000013803	Avian	0	1185.24	0	0.122	-0.514499	0.125829	0.0738182					0.0478049	0.0508091	0.283579	0.309891	0.271893	0.598703	0.598703	66.1	14.0966	0.0147482	0.019342	0.0129589	0.0107282	0.0296743	0.00707451	0.0147092	0.0416381	0.018304	0.417569	0.186071	0	0	0	0	0	0
20432	ADAMTS19	HGNC:17111	ENSG00000145808	ENSGALG00000000151	ENSACAG00000001491	ENSNSUG00000013805	Avian	0	1185.24	0	0.273	1.25964	-0.443853	0.079375	5	1	7	1	0.145414	0.0778603	0.147999		0.158748	0.532834	0.532834		0.563684	0.0264226	0.00783772	0.0225331	0.0965992	0.133698	0.0108863	0.0156697	0.097043	0.043459	0.171571	0.58649	0	0	0	0	0	0
20433	MINAR2	HGNC:33914	ENSG00000186367	ENSGALG00000027692	ENSACAG00000001484	ENSNSUG00000013806	Avian	0	1185.24	0	0.178			0.0235882					0.203986	0.3	0.373832							0.0379156	0.0288289	0.0384775	0.0286104	0.0298311	0.0182396	0.0298432	0.8313	0.0921552			0	0	0	0	0	0
20434	CHSY3	HGNC:24293	ENSG00000198108	ENSGALG00000026899	ENSACAG00000001454	ENSNSUG00000013807	Avian	0	1185.24	0	0.22	0.00118852	0.356605	0.177853	3		9	1	0.0802986	0.121545	0.136175			0.26941	0.26941		0.517722	0.0163666	0.00632196	0.00454846	0.00611266	0.0165037	0.00564887	0.0227073	0.0243827	0.0645292	0.0459916	0.266286	1	0	0	0	0	0
20435	HINT1	HGNC:4912	ENSG00000169567	ENSGALG00000000428	ENSACAG00000001424	ENSNSUG00000010176	Avian	429.7	1185.24	0.362543	0.28	-0.179293	-0.262583	0.0027619					0.0506667	0.101983	0.125812	0.622761	0.664585	0.644541	0.644541	66.1	299.998	0.0192078	0.0284991	0.020236	0.0150452	0.0194262	0.0209207	0.0222062	0.0104609	0.0243292	0.156737	0.297226	0	0	0	0	0	0
20436	LYRM7	HGNC:28072	ENSG00000186687	ENSGALG00000037299	ENSACAG00000001420	ENSNSUG00000013809	Avian	0	1185.24	0	0.079	-0.165929	-0.254184	0.00927778					0.201101	0.382283	0.315569	0.26463		0.487522	0.487522	3.4		0.0727388	0.01326	0.0215087	0.0164764	0.0171577	0.0184105	0.0197808	0.0295942	0.00514332	0.176226	0.337069	0	0	0	1	0	0
20437	CDC42SE2	HGNC:18547	ENSG00000158985	ENSGALG00000027258	ENSACAG00000001389	ENSNSUG00000013811	Avian	98	1185.24	0.0826837	0.221	-0.104228	0.407862	0.118871	4		3			0.0316794	0.0521165	0.171058		0.401107	0.401107	14.5	16.0143	0.0381056	0.0207221	0.0191776	0.02485	0.0180754	0.0161265	0.0151871	0.00721141	0.00857831	0.123375	0.0944219	0	0	0	1	0	0
20438	SPTLC1	HGNC:11277	ENSG00000090054	ENSGALG00000013493	ENSACAG00000001052	ENSNSUG00000013817	Avian	0	1185.24	0	0.348	-0.42523	-0.467554	0.0735			2	1	0.0578003	0.0894539	0.12032	0.462753	0.592413	0.740218	0.740218	32.7	20.66	0.0268317	0.0212844	0.0313043	0.0271892	0.026524	0.0198847	0.0448629	0.0236344	0.0190828	0.337584	0.0679967	0	0	0	0	0	0
20439	ROR2	HGNC:10257	ENSG00000169071	ENSGALG00000015208	ENSACAG00000000922	ENSNSUG00000013904	Avian	49.2	1185.24	0.0415106	0.158	-0.710432	0.949949	0.00886667					0.0464792	0.024236	0.0624897	0.0625	0.240036	0.313669	0.313669	0.3	11.4677	0.0240862	0.148977	0.0676543	0.0560058	0.134805	0.191746	0.050496	0.0053617	0.0292506	0.0708758	0.133117	0	0	0	0	0	1
20440	NFIL3	HGNC:7787	ENSG00000165030	ENSGALG00000015209	ENSACAG00000000915	ENSNSUG00000013919	Avian	468.9	1185.24	0.395616	0.263	-0.408305	0.632684	0.143857	5	1	5	1	0.074268	0.075431	0.14538	0.20314	0.428433	0.351621	0.351621	4.9	10.7671	0.0141186	0.042295	0.0204765	0.342002	0.0310179	0.0206373	0.025399	0.0076901	0.0224884	0.16099	0.162096	0	0	0	0	0	1
20441	AUH	HGNC:890	ENSG00000148090	ENSGALG00000021843	ENSACAG00000028614	ENSNSUG00000013921	Avian	0	1185.24	0	0.108	-0.241737	0.309706	0.100286	2	1			0.0477974	0.046332	0.231517	0.293703	0.383834	0.584699	0.584699	9.8	8.40147	0.00967082	0.0292023	0.0180665	0.0219897	0.0157849	0.0172514	0.0149212	0.0176829	0.0116806	0.427571	0.0966952	0	0	0	0	0	0
20442	TPPP2	HGNC:19293	ENSG00000179636	ENSGALG00000015213	ENSACAG00000011386	ENSNSUG00000012180	Avian	0	1185.24	0	0.125				NA				0.112378		0.176077		0.114376				0.165203	0.944833	0.000964603	0.06184	0.0855698	0.0161295	0.0067759	0.00858466	0.870905	0.00231839			0	0	0	0	0	0
20443	SYK	HGNC:11491	ENSG00000165025	ENSGALG00000015216	ENSACAG00000000768	ENSNSUG00000013925	Avian	0	1185.24	0	0.843	-0.870493	-1.06047	0.0272069					0.0462111	0.101787	0.115879	0.0949784	0.159567	0.36677	0.36677	2.5	7.02561	0.0283135	0.0086935	0.0052217	0.00343737	0.0087813	0.00977753	0.0503127	0.0221672		0.681625	0.109912	0	0	0	0	0	0
20444	DIRAS2	HGNC:19323	ENSG00000165023	ENSGALG00000005323	ENSACAG00000000763	ENSNSUG00000013926	Avian	0	1185.24	0	0.16	1.18239	1.32458	0.165214	2	1			0.00376577	0.0361557	0.0195357		0.205424	0.269132	0.269132		14.5573	0.000256738	0.000110137	7.0227e-05	5.04709e-05	0.000234204	0.000754382	7.41382e-05	0.0267214	0.0108311	0.0136589	0.00866444	0	0	0	0	0	0
20445	GADD45G	HGNC:4097	ENSG00000130222	ENSGALG00000028005	ENSACAG00000012182	ENSNSUG00000013927	Avian	0	1185.24	0	0.402	0.109116	0.595553	0.06096			2	1	0.0147332	0.0127327	0.0763588	0.134884		0.382536	0.382536	1	5.97251	0.0189987	0.0684105	0.00593464	0.0104775	0.00528384	0.00258215	0.00382161	0.0506275	0.185567	0.119314	0.445213	0	0	0	0	0	0
20446	SEMA4D	HGNC:10732	ENSG00000187764	ENSGALG00000010697	ENSACAG00000016619	ENSNSUG00000013928	Avian	0	1185.24	0	0.19	-0.788319	-0.000385681	0.1087	1		1		0.0922967	0.13552	0.139655	0.0965064	0.215639	0.310095	0.310095	1.1	12.2408	0.014887	0.0104427	0.00981764	0.00922754	0.00495004	0.00383377	0.0184196	0.0206632	0.0195173	0.806205	0.0576367	0	0	0	0	0	0
20447	SECISBP2	HGNC:30972	ENSG00000187742	ENSGALG00000010694	ENSACAG00000016594	ENSNSUG00000013930	Avian	0	1185.24	0	0.078	-0.938933	-2.53125	0.101333					0.26347	0.411657	0.344737	0.291572	0.58241	0.539353	0.539353	14.3	12.4574	0.0744255	0.0226377	0.0352052	0.04753	0.0236643	0.0211165	0.0228361	0.0403615	0.0242997	0.105531	0.0634318	0	0	0	1	0	0
20448	CKS2	HGNC:2000	ENSG00000123975	ENSGALG00000038817	ENSACAG00000016581	ENSNSUG00000013932	Avian	0	1185.24	0	0.949	-1.07914	-0.283444	0.0776667	2		1		0.0342075	0.100654	0.0256076	0.158602		0.298795	0.298795	602.8		0.414204	0.0190692	0.0132658	0.00658268	0.010542	0.00910854	0.0407567	0.431131	0.401183	0.836694	0.372532	0	0	0	0	0	0
20449	SHC3	HGNC:18181	ENSG00000148082	ENSGALG00000010688		ENSNSUG00000013933	Avian	0	1185.24	0	0.381	-0.455197	1.19386	0.159927	1		1	1	0.0902855	0.288863			0.118251	0.252031	0.252031		0.0606483	0.00240501	0.00224144	0.000959921	0.0183257	0.00715824	0.00529574	0.0131857	0.0219483	0.0220585	0.00805774	0.00602569	0	0	0	0	0	0
20450	S1PR3	HGNC:3167	ENSG00000213694	ENSGALG00000049835	ENSACAG00000016536	ENSNSUG00000013934	Avian	0	1185.24	0	0.102	-0.91811	0.444403	0.0344483					0.0695832					0.421884	0.421884	1.7	3.05101	0.00186148	0.0566189	0.00506695	0.0400602	0.034972	0.0172498	0.0309096			0.137214	0.101371	0	0	0	0	0	0
20451	NXNL2	HGNC:30482	ENSG00000130045	ENSGALG00000026598	ENSACAG00000016534	ENSNSUG00000013935	Avian	0	1185.24	0	0.122			0.317	1	1			0.0628636	0.0387931						0.2	15.8362	0.0422237	0.0278462	0.0296937	0.00630857	0.0354047	0.00854727	0.025988	0.0822148	0.0916508		0.037488	0	0	0	0	0	0
20452	SPIN1	HGNC:11243	ENSG00000106723	ENSGALG00000014916		ENSNSUG00000013936	Avian	563.8	1185.24	0.475684	0.058			0.180675	12		17	1	0.012693			0.0625	0.576866	0.444523	0.444523	31.1	104.484	0.0306266	0.0275034	0.0336738	0.0302144	0.0329308	0.021371	0.0203419	0.0385698	0.0261079	0.211118	0.131247	0	0	0	0	0	0
20453	CNTNAP4	HGNC:18747	ENSG00000152910	ENSGALG00000023179	ENSACAG00000016407	ENSNSUG00000013940	Avian	0	1260.24	0	0.188	0.0797576	-1.36	0.00828571	2	1			0.126256	0.244366	0.133298		0.136291	0.254676	0.254676		0.0220643	0.00330872	0.000126907	9.07403e-05	0.000134033	5.02449e-05	0.000465365	0.000394057	0.0725675	0.00531511	0.0122279	0.0573618	1	0	0	0	0	0
20454	CFC1B	HGNC:33983	ENSG00000152093	ENSGALG00000012623	ENSACAG00000012757	ENSNSUG00000014348	Avian	0	1260.24	0									0.260668	0.709068	0.389062		0.166835				153.393								0.618489	0.201717			0	0	0	0	1	0
20455	PRXL2C	HGNC:16881	ENSG00000158122	ENSGALG00000012624	ENSACAG00000012762	ENSNSUG00000014349	Avian	0	1260.24	0		-0.864248	-0.708128	0.0170476					0.149769	0.507021	0.287008	0.402848	0.53354	0.684772	0.684772	7.5	10.448	0.0205578	0.0277243	0.0234674	0.0834339	0.0304917	0.0279705	0.0189124	0.00626197	0.0229517	0.288575	0.0823429	0	0	0	0	0	0
20456	CDC14B	HGNC:1719	ENSG00000081377	ENSGALG00000012627	ENSACAG00000012788	ENSNSUG00000014350	Avian	0	1260.24	0		0.237507	-0.00635845	0.00834043	4	1			0.208689	0.32109	0.165683	0.0722171	0.190211	0.544613	0.544613	1.1	6.38672	0.0495088	0.0214757	0.0156726	0.020553	0.0116533	0.0157088	0.00968942	0.193998	0.0272738	0.382385	0.151987	0	0	0	0	0	0
20457	HABP4	HGNC:17062	ENSG00000130956	ENSGALG00000012628	ENSACAG00000012890	ENSNSUG00000014351	Avian	0	1260.24	0	0.158	-0.0104178	0.88696	0.225444			3	1	0.160454	0.39861	0.193139	0.376464	0.217147	0.330047	0.330047	0.8	5.99288	0.037808	0.0130321	0.0130135	0.0406474	0.0120981	0.0130102	0.00683067	0.413899	0.519097	0.757468	0.173289	0	0	0	0	0	0
20458	ZNF367	HGNC:18320	ENSG00000165244	ENSGALG00000012629	ENSACAG00000012929	ENSNSUG00000014352	Avian	75	1260.24	0.0595125	0.753	0.192456	1.39349	0.304095	16	1	10	1	0.076843	0.130435	0.170602		0.372292	0.36597	0.36597	0.1	9.09015	0.155338	0.0109777	0.028282	0.0644784	0.0138903	0.0122953	0.0351952	0.187851	0.129442	0.284315	0.109436	0	0	0	0	0	0
20459	SLC35D2	HGNC:20799	ENSG00000130958	ENSGALG00000052503	ENSACAG00000012938	ENSNSUG00000014353	Avian	0	1260.24	0	0.183	-0.232316	0.681499	0.0517308					0.120766			0.445637		0.431435	0.431435	2.6		0.00784887	0.020242	0.0263959	0.0306023	0.0167106	0.0160779	0.0180907			0.579462	0.0662326	0	0	0	0	0	0
20460	HSD17B3	HGNC:5212	ENSG00000130948	ENSGALG00000045920		ENSNSUG00000014354	Avian	0	1260.24	0	0.12	0.327173	-0.168225	0.0176					0.303082			0.0696726				1		0.286395	0.0147242	0.0172958	0.0826775	0.0137422	0.015934	0.0101717	0.131048	0.0121455			0	0	0	0	0	0
20461	ERCC6L2	HGNC:26922	ENSG00000182150	ENSGALG00000012621	ENSACAG00000012947	ENSNSUG00000014355	Avian	75	1260.24	0.0595125		-0.974438	0.973815	0.0247778					0.120781	0.384147	0.144977	0.352446	0.255673	0.6034	0.6034	1.5	14.2384	0.0312822	0.039707	0.0374148	0.0388205	0.0362839	0.03853	0.0246565	0.0194951	0.063075	0.299287	0.0868227	0	0	0	0	0	0
20462	PTCH1	HGNC:9585	ENSG00000185920	ENSGALG00000012620	ENSACAG00000012983	ENSNSUG00000014356	Avian	168.84	1260.24	0.133974	0.568	0.43314	0.676562	0.14927	21	1	15	1	0.0338089	0.127045	0.0951123	0.102897	0.504121	0.261183	0.261183	1	5.37296	0.0553639	0.0233749	0.0270579	0.0280814	0.0168184	0.0133671	0.0174064	0.0638542	0.0371929	0.0313974	0.183458	1	0	0	0	1	0
20463	FANCC	HGNC:3584	ENSG00000158169	ENSGALG00000012618	ENSACAG00000013146	ENSNSUG00000014357	Avian	0	1260.24	0	0.065	0.56157	0.548461	0.046					0.482805	0.276879	0.410638	0.108456	0.22758			4.4	30.4894	0.0868891	0.0202528	0.0165123	0.0364749	0.0273692	0.0165533	0.0261296	0.115206	0.0646921		0.194425	0	0	0	0	0	0
20464	AOPEP	HGNC:1361	ENSG00000148120	ENSGALG00000040796	ENSACAG00000013209	ENSNSUG00000014363	Avian	0	1260.24	0	0.128	-0.399262	0.0399244	0.0557812					0.3411	0.28943		0.354143		0.689243	0.689243	11.8	3.61891	0.0127974	0.0483769	0.01915	0.0963293	0.0434353	0.0294807	0.0280851	0.033237	0.0537025	0.262105	0.087231	0	0	0	0	0	0
20465	FBP1	HGNC:3606	ENSG00000165140	ENSGALG00000012613	ENSACAG00000013243	ENSNSUG00000014364	Avian	0	1260.24	0	0.356	-0.701953	0.0775288	0.0146667					0.106794	0.100785	0.105097	0.14065	0.171147	0.307522	0.307522	1.5	3.03573	0.00183088	0.0062071	0.000908882	0.000470916	0.00118442	0.00226128	0.00501872	0.0133794	0.000742258	0.108981	0.0500295	0	0	0	0	0	0
20466	FBP2	HGNC:3607	ENSG00000130957	ENSGALG00000012612		ENSNSUG00000014365	Avian	0	1260.24	0	0.157	-0.406412	-1.24798	0.00433333	1	1			0.0488309	0.0457026		0.191013	0.153696	0.350498		1.2	0.286586	0.0113653	0.000608256	0.000386159	0.000412286	0.000325621	0.000553438	0.000394985	0.00273523	0.000666581	0.0884607		0	0	0	0	0	0
20467	CTSL	HGNC:2537	ENSG00000135047	ENSGALG00000012610	ENSACAG00000013328	ENSNSUG00000014366	Avian	0	1260.24	0		-0.293144	-1.22701	0.0356667					0.224131	0.0465813	0.0788914	0.331614	0.385446	0.381956	0.381956	253.4	1689.88	0.0333742	0.0238676	0.0324429	0.0251034	0.0280402	0.0337719	0.0110556	0.0247739	0.0662165	0.154816	0.194544	1	0	0	0	0	0
20468	DAPK1	HGNC:2674	ENSG00000196730	ENSGALG00000012608	ENSACAG00000013377	ENSNSUG00000014368	Avian	75	1260.24	0.0595125	0.148	-2.62354	-1.10404	0.106118	5	1	4	1	0.0364639			0.276442	0.229508	0.490384	0.490384	5.3	11.3359	0.0166936	0.00589301	0.0893184	0.0387046	0.0191614	0.0607277	0.00553299	0.0171555	0.0407616	0.220092	0.190799	1	0	0	0	0	1
20469	GAS1	HGNC:4165	ENSG00000180447	ENSGALG00000017658	ENSACAG00000014344	ENSNSUG00000014372	Avian	75	1260.24	0.0595125	0.415			0.201091	10	1	10	1	0.0640713	0.18777	0.00224232		0.239428	0.548466	0.548466			0.00336026	0.0809626	0.067056	0.17581	0.146122	0.0431595	0.0106871	0.042048	0.027442	0.455817	0.744539	0	0	0	0	0	1
20470	TUT7	HGNC:25817	ENSG00000083223	ENSGALG00000012607	ENSACAG00000000279	ENSNSUG00000014450	Avian	75	1260.24	0.0595125	0.151	-0.079022	1.48695	0.0444286					0.184471	0.252174		0.265267	0.475005	0.51772	0.51772	6.9	7.82171	0.027025	0.0431802	0.0170758	0.0314159	0.0190733	0.0214339	0.0473472	0.105308	0.0311148	0.199228	0.0886133	0	0	0	0	0	1
20471	ISCA1	HGNC:28660	ENSG00000135070	ENSGALG00000012606	ENSACAG00000000369	ENSNSUG00000014450	Avian	75	1260.24	0.0595125	0.239	-0.181554	0.347399	0.02275					0.0200589	0.0378708	0.0201845	0.286628	0.653813	0.709079	0.709079	36.6	10.8971	0.0337437	0.0192766	0.0214763	0.0264588	0.0201683	0.0244787	0.0128759	0.0362718	0.0366245	0.149226	0.22971	0	0	0	0	0	1
20472	GOLM1	HGNC:15451	ENSG00000135052	ENSGALG00000012601	ENSACAG00000000371	ENSNSUG00000014449	Avian	75	1260.24	0.0595125	0.306	-0.102103	-0.532671	0.0620857					0.213098	0.386227		0.341406	0.241863	0.714831	0.714831	7.8	35.9162	0.0113687	0.0154461	0.0171583	0.00739699	0.0124983	0.00922535	0.00750441	0.40691	0.0302517	0.218625	0.0253136	0	0	0	1	0	1
20473	NAA35	HGNC:24340	ENSG00000135040	ENSGALG00000012598	ENSACAG00000000424	ENSNSUG00000014452	Avian	0	1260.24	0		0.297357	0.739185	0.0427609					0.0209191	0.0208659	0.0773544	0.318171	0.551248	0.681123	0.681123	25	38.5791	0.0641861	0.0287669	0.0231314	0.0268019	0.0233273	0.0331007	0.0268465	0.0204783	0.0437183	0.209498	0.111372	0	0	0	0	0	0
20474	AGTPBP1	HGNC:17258	ENSG00000135049	ENSGALG00000012595	ENSACAG00000000770	ENSNSUG00000014453	Avian	0	1260.24	0	0.61	0.150626	-1.35226	0.0123478	22	1	9		0.0778768		0.108044	0.190775	0.2579	0.605911	0.605911	3.5	0.319576	0.0348575	0.0112161	0.0104503	0.0275935	0.0129586	0.0125769	0.0124501	0.0546919	0.0945186	0.0975227	0.116977	0	0	0	0	0	0
20475	NTRK2	HGNC:8032	ENSG00000148053	ENSGALG00000012594	ENSACAG00000000978	ENSNSUG00000014454	Avian	251.04	1260.24	0.1992	0.34	0.669989	1.3843	0.0313077	20	1	14	1	0.0506012	0.068233	0.0914553	0.0625	0.118768	0.282634	0.282634		0.317126	0.000701288	0.0029794	0.00467752	0.0146141	0.00302872	0.00127223	0.00457424	0.0125084	0.00118807	0.0913463	0.0118813	1	0	0	0	0	0
20476	SLC28A3	HGNC:16484	ENSG00000197506	ENSGALG00000012593	ENSACAG00000001185	ENSNSUG00000014456	Avian	0	1260.24	0	0.143	0.428271	0.909633	0.0386296					0.255984	0.250133	0.191609		0.129223	0.270714	0.270714	10.6	18.5108	0.00802827	0.00141226	0.000578597	0.00414159	0.00103362	0.000753922	0.0362687	0.119836		0.0144637	0.0723707	0	0	0	0	0	0
20477	RMI1	HGNC:25764	ENSG00000178966	ENSGALG00000012592	ENSACAG00000001474	ENSNSUG00000014457	Avian	75	1260.24	0.0595125	0.66	0.185577	0.742258	0.00677778					0.310423	0.32594			0.116697	0.369432		13.3	25.208	0.0690165	0.0246451	0.0181782	0.0132075	0.0145193	0.0109224	0.0266593	0.0402819	0.130809	0.676715		0	0	0	0	0	0
20478	HNRNPK	HGNC:5044	ENSG00000165119	ENSGALG00000012591	ENSACAG00000001479	ENSNSUG00000014458	Avian	502.34	1260.24	0.398607	0.867	0.40271	0.886596	0.195368	5		5	1		0.108294	0.0481928	0.585911	0.591665	0.764608	0.764608	152.2	372.148	0.0252833	0.0267425	0.0318418	0.0337541	0.0311248	0.0265483	0.0307348	0.0567521	0.0406674	0.303092	0.21073	0	0	0	0	0	0
20479	C9orf64	HGNC:28144	ENSG00000165118	ENSGALG00000012589	ENSACAG00000001721	ENSNSUG00000014459	Avian	0	1260.24	0	0.106	-0.141184	-0.557477	0.0654667					0.160301	0.142336	0.100582	0.42894	0.266942	0.368636	0.368636	51.7	31.964	0.0285662	0.0288323	0.0341381	0.023319	0.0344801	0.0307645	0.022619	0.0170643	0.0198202	0.15101	0.120372	0	1	0	0	0	0
20480	KIF27	HGNC:18632	ENSG00000165115	ENSGALG00000012588	ENSACAG00000001735	ENSNSUG00000014461	Avian	0	1260.24	0	0.065	-0.954084	-2.53125	0.0065625					0.187087	0.159907		0.196599	0.122917	0.453768	0.453768	1.1	4.209	0.201039	0.0270319	0.0285518	0.0126834	0.0231909	0.0248945	0.0177913	0.688785	0.213517	0.0977955	0.565191	0	0	0	0	0	0
20481	GKAP1	HGNC:17496	ENSG00000165113	ENSGALG00000012586	ENSACAG00000001835	ENSNSUG00000014462	Avian	0	1260.24	0	0.261	0.33726	-0.411036	0.122			2	1	0.072216		0.111604	0.104831	0.150799	0.721455	0.721455	7.1	11.6397	0.398618	0.0186072	0.026144	0.0324285	0.0170775	0.0296755	0.00721586	0.449172	0.125179	0.346522	0.125288	0	0	0	0	0	0
20482	UBQLN1	HGNC:12508	ENSG00000135018	ENSGALG00000012585	ENSACAG00000001880	ENSNSUG00000014464	Avian	350.24	1260.24	0.277915	0.453	0.371173	0.549416	0.0582778	2		2		0.0921268	0.255505	0.0989288	0.227381	0.52568	0.674075	0.674075	94.8	27.6577	0.025878	0.0268118	0.0181333	0.0285548	0.0270709	0.0236801	0.0261096	0.0221199	0.0729675	0.370879	0.0602926	0	0	0	0	0	0
20483	IDNK	HGNC:31367	ENSG00000148057	ENSGALG00000012583	ENSACAG00000002000	ENSNSUG00000014976	Avian	0	1260.24	0	0.1								0.264809	0.298036	0.227214	0.37211	0.314817	0.358152	0.358152		9.97932								0.0241572	0.0193041	0.698028	0.113011	0	0	0	0	0	0
20484	FRMD3	HGNC:24125	ENSG00000172159	ENSGALG00000012577	ENSACAG00000002032	ENSNSUG00000014978	Avian	0	1260.24	0	0.139	-0.422585	0.496698	0.0468077	8	1	6	1	0.119609	0.0990167		0.144896	0.249914	0.348338	0.348338	1.9	1.86676	0.0481619	0.00908679	0.00568234	0.0177167	0.0132657	0.0120701	0.006985	0.0855482	0.0404988	0.251374	0.00126139	0	1	0	0	0	0
20485	RASEF	HGNC:26464	ENSG00000165105	ENSGALG00000012576	ENSACAG00000002155	ENSNSUG00000014982	Avian	75	1283.14	0.0584504	0.083	-0.156501	1.04178	0.105516					0.179949	0.145664		0.0625	0.19774	0.336147	0.336147		5.98566	0.0120739	0.0587316	0.00778282	0.00349734	0.00616906	0.00470425	0.0277732	0.229341	0.0200416	0.129636	0.0494959	0	0	0	1	0	0
20486	TLE1	HGNC:11837	ENSG00000196781	ENSGALG00000012575	ENSACAG00000002262	ENSNSUG00000014982	Avian	0	1283.14	0	0.981	-0.0716003	0.239189		15	1	11	1	0.0218457	0.0452876	0.0175061	0.46798	0.241107	0.680483	0.680483	14.9	9.42326	0.0260693	0.026476	0.0204915	0.07916	0.0376288	0.0255549	0.0272064	0.0178056	0.0561256	0.367386	0.276061	1	0	0	0	0	0
20487	TLE4	HGNC:11840	ENSG00000106829	ENSGALG00000015184	ENSACAG00000002789	ENSNSUG00000014992	Avian	0	1283.14	0	0.947	0.62027	0.787862	0.335437	19	1	16	1	0.00522042	0.0194175	0.0272953	0.183216	0.488678	0.586343	0.586343	3.6	10.9948	0.240659	0.0117746	0.0541349	0.03252	0.0236769	0.019703	0.0305846	0.112421	0.0446733	0.40953	0.0697706	1	0	0	0	0	0
20488	PSAT1	HGNC:19129	ENSG00000135069	ENSGALG00000015180	ENSACAG00000006074	ENSNSUG00000017692	Avian	0	1283.14	0		-0.702421	0.88358	0.1081					0.0631186	0.0813993	0.060885	0.177034	0.157995	0.618073	0.618073	7.8	12.1804	0.0103034	0.00623477	0.00333539	0.000169147	0.000863775	0.00235659	0.0150008	0.00616104	0.0107327	0.125931	0.0286537	0	0	0	1	0	0
20489	CEP78	HGNC:25740	ENSG00000148019	ENSGALG00000015179	ENSACAG00000005485	ENSNSUG00000017693	Avian	0	1283.14	0	0.177	0.603533	0.575868	0.00596364					0.207396	0.277907	0.237979	0.26706	0.170949	0.745486	0.745486	17	3.25986	0.187295	0.0192415	0.0316161	0.0406435	0.0312146	0.0223243	0.0278564	0.118858	0.0787805	0.335352	0.315035	0	0	0	0	0	0
20490	GNAQ	HGNC:4390	ENSG00000156052	ENSGALG00000015177	ENSACAG00000005913	ENSNSUG00000017696	Avian	365.5	1283.14	0.284848	0.423	0.182632	0.264864	0.27993	31	1	19	1	0.00408998	0.0328975	0.0279232	0.0625	0.52522	0.3727	0.3727	2.8	14.0476	0.010166	0.0268584	0.0200388	0.0379856	0.0249906	0.0285854	0.0134595	0.0316049	0.0170832	0.131772	0.0635692	0	0	0	0	0	0
20491	GNA14	HGNC:4382	ENSG00000156049	ENSGALG00000015176	ENSACAG00000028039	ENSNSUG00000017696	Avian	0	1283.14	0	0.257	0.0812041	-2.20071	0.001					0.0258284			0.236975	0.11619	0.292201	0.292201	1.5	0.0524525	0.0189582	0.0573588	0.0298433	0.0286161	0.127415	0.0277677	0.0172885	0.0445501	0.0194872	0.0334567	0.110226	0	0	0	0	0	0
20492	VPS13A	HGNC:1908	ENSG00000197969	ENSGALG00000015170	ENSACAG00000005655	ENSNSUG00000017697	Avian	0	1283.14	0	0.131	0.0371778	-0.133028	0.0342857	1	1			0.151559	0.168675	0.140809	0.276895	0.55122	0.567529	0.567529	1	5.99683	0.0463694	0.0244929	0.0137117	0.0246885	0.0270956	0.029945	0.0228634	0.0520371	0.0238962	0.276345	0.0706094	1	0	0	0	0	0
20493	FOXB2	HGNC:23315	ENSG00000204612	ENSGALG00000028819	ENSACAG00000023403	ENSNSUG00000019118	Avian	0	1283.14	0	0.551								0.0516725		0.0014459			0.263975	0.263975		0.0128141	0.236001									0.0154106		0	0	0	0	0	0
20494	PRUNE2	HGNC:25209	ENSG00000106772	ENSGALG00000015167	ENSACAG00000005636	ENSNSUG00000017711	Avian	0	1283.14	0	0.063	-1.59969	0.725694	0.229368					0.34821			0.210635	0.283435	0.250707	0.250707	0.6	0.121908	0.00259427	0.0776286	0.00152838	0.0431461	0.0460319	0.114363	0.00702441	0.0452828	0.00318129	0.00281886	0.0080607	1	0	0	1	0	0
20495	GCNT1	HGNC:4203	ENSG00000187210	ENSGALG00000015166	ENSACAG00000005572	ENSNSUG00000017727	Avian	0	1283.14	0	0.077	0.38968	0.184633	0.107057					0.124361	0.0665476	0.100303		0.26515	0.271063	0.271063	1.2	21.2487	0.0250204	0.0115686	0.00546009	0.00722319	0.0152463	0.00522565	0.00946863	0.0157288	0.107102	0.922294	0.0048668	0	0	0	0	0	0
20496	RFK	HGNC:30324	ENSG00000135002	ENSGALG00000000004	ENSACAG00000005559	ENSNSUG00000010615	Avian	98	1283.14	0.0763751	0.058	-0.428072	0.500033	0.0218125					0.080383	0.240263			0.527595	0.49703	0.49703	125.3	23.6565	0.0353848	0.0157169	0.0152122	0.0205202	0.0141201	0.0115321	0.0105955	0.0469515	0.00610599	0.257266	0.0211903	0	0	0	0	0	0
20497	PCSK5	HGNC:8747	ENSG00000099139	ENSGALG00000015164	ENSACAG00000005525	ENSNSUG00000020175	Avian	98	1283.14	0.0763751	0.105	0.453474	0.389704	0.227655	12	1	9	1	0.151601	0.281188	0.0856736	0.367242	0.294606	0.46782	0.46782	0.9	0.781385	0.0354358	0.0180123	0.0489916	0.064859	0.0191968	0.0130118	0.0343779	0.0309336	0.001672	0.148369	0.00529778	0	0	0	0	0	0
20498	OSTF1	HGNC:8510	ENSG00000134996	ENSGALG00000017447	ENSACAG00000005379	ENSNSUG00000017729	Avian	75	1283.14	0.0584504	0.127	0.658439	-0.499351	0.0807059					0.026653	0.043565	0.10091	0.260063	0.288243	0.56806	0.56806	16.6	48.0988	0.0154873	0.0163882	0.0141617	0.0193969	0.0135963	0.0091286	0.0571245	0.047499	0.0418422	0.335654	0.0675162	0	0	0	1	0	0
20499	NMRK1	HGNC:26057	ENSG00000106733	ENSGALG00000015156	ENSACAG00000005328	ENSNSUG00000017730	Avian	0	1283.14	0		0.766079	0.643237	0.0268182					0.14983	0.232696		0.392974	0.383033	0.685985	0.685985	2.9	21.9811	0.0177568	0.0153708	0.023229	0.0232611	0.0128214	0.00827984	0.0244842	0.0116663	0.0107991	0.306599	0.156281	0	0	0	0	0	0
20500	CARNMT1	HGNC:23435	ENSG00000156017	ENSGALG00000015155	ENSACAG00000029442	ENSNSUG00000017731	Avian	75	1283.14	0.0584504		0.158925	0.580814						0.122037	0.052972	0.216911	0.0625	0.548457	0.575284	0.575284		43.2021	0.0620501	0.0187566	0.0191991	0.0114904	0.0190384	0.014484	0.0331974	0.0223476	0.0237051	0.282038	0.16769	0	0	0	1	0	0
20501	C9orf40	HGNC:23433	ENSG00000135045			ENSNSUG00000014452	Avian	0	1283.14	0	0.22	-0.370134	0.210072	0.158062					0.461024							8.6		0.129513	0.0151378	0.0141328	0.0407635	0.0207876	0.0232699	0.0208316					0	0	0	1	0	0
20502	TRPM6	HGNC:17995	ENSG00000119121	ENSGALG00000015154	ENSACAG00000005230	ENSNSUG00000017734	Avian	0	1283.14	0	0.124	-0.377838	1.14964	0.07412					0.229815	0.266498			0.379027			7.1	0.23188	0.0391497	0.00970568	0.0076469	0.0247413	0.0133641	0.00931109	0.0138926	0.103411	0.0139974		0.000222772	0	0	0	0	0	0
20503	RORB	HGNC:10259	ENSG00000198963	ENSGALG00000015150	ENSACAG00000005205	ENSNSUG00000017735	Avian	75	1283.14	0.0584504	0.765	0.294363	0.693387	0.353717	28	1	25	1	0.0328162	0.0381743	0.059101			0.259392	0.259392		0.256411	0.012579	0.038452	0.00462137	0.0052575	0.00619168	0.00396904	0.0113397	0.084594	0.0194139	0.0162769	0.0305042	0	0	0	0	0	0
20504	ANXA1	HGNC:533	ENSG00000135046	ENSGALG00000015148	ENSACAG00000011929	ENSNSUG00000017744	Avian	0	1283.14	0	0.716			0.0108889					0.122721	0.143089	0.138973	0.175867	0.196949	0.585948	0.585948	0.6	1.7347	0.000735124	0.00898081	0.00915179	0.00978652	0.00916402	0.0063296	0.134918	0.0109099	0.00736241	0.426659	0.792065	0	0	0	0	0	0
20505	ALDH1A1	HGNC:402	ENSG00000165092	ENSGALG00000015147	ENSACAG00000012229	ENSNSUG00000017747	Avian	0	1283.14	0	0.35	-2.62354	-2.53125	0.00385714					0.11261	0.0674187	0.0907663	0.285731	0.16423	0.268582	0.268582		0.104604	0.035563	0.00915473	0.038306	0.0353905	0.00950035	0.033996	0.00943141	0.0121466	0.00613634	0.930814	0.272802	0	0	0	0	0	0
20506	TMC1	HGNC:16513	ENSG00000165091	ENSGALG00000015145	ENSACAG00000012478	ENSNSUG00000017748	Avian	0	1283.14	0	0.096	-1.54867	-1.24986	0.0365714					0.026399	0.0693262	0.0957238		0.111111			0.7	0.124658	0.0837989	0.0202137	0.0230808	0.0199704	0.0251453	0.0128658	0.0329001	0.232785				0	0	0	0	0	0
20507	ZFAND5	HGNC:13008	ENSG00000107372	ENSGALG00000015144	ENSACAG00000012653	ENSNSUG00000017750	Avian	348.8	1283.14	0.271833	0.13	0.206046	0.618923	0.235327	13	1	16	1	0.0557404	0.164657		0.333436	0.413587	0.673543	0.673543	94.4	25.1257	0.0179067	0.0199566	0.0346009	0.141103	0.0160033	0.0192828	0.0148482	0.0266296	0.0179024	0.180254	0.189473	0	0	0	0	0	0
20508	GDA	HGNC:4212	ENSG00000119125	ENSGALG00000015141	ENSACAG00000012708	ENSNSUG00000017751	Avian	0	1283.14	0	0.395	0.477608	0.529382	0.0808919					0.1056	0.235861	0.291006	0.0676349	0.361245	0.392769	0.392769	0.6	0.375708	0.00343698	0.000139325	0.000148755	0.000474807	0.000153829	0.000242248	0.000203939	0.0030966	0.00308181	0.125918	0.00861219	0	1	0	0	0	0
20509	C9orf85	HGNC:28784	ENSG00000155621	ENSGALG00000026001	ENSACAG00000012828	ENSNSUG00000017752	Avian	0	1283.14	0	0.165	0.508543	0.793358	0.0312333					0.203325	0.114986	0.125315	0.261963		0.730435	0.730435	21.4	24.1486	0.0319582	0.0247597	0.0255271	0.0304897	0.0259008	0.0178422	0.0266438	0.262667	0.117652	0.206722	0.142564	0	0	0	0	0	0
20510	ABHD17B	HGNC:24278	ENSG00000107362	ENSGALG00000015139	ENSACAG00000012837	ENSNSUG00000017755	Avian	98	1283.14	0.0763751		-0.261827	0.57089	0.185368	12	1	7	1	0.0150115	0.0220798	0.0142824	0.430966	0.201464	0.426044	0.426044	3.9	14.8029	0.0366558	0.0178512	0.0208868	0.0252195	0.0238472	0.0130814	0.0311134	0.0311101	0.0428867	0.117755	0.0626247	0	0	0	0	0	0
20511	CEMIP2	HGNC:11869	ENSG00000135048	ENSGALG00000015138	ENSACAG00000012861	ENSNSUG00000017755	Avian	75	1283.14	0.0584504	0.064	-0.177502	-1.36925	0.298176	2		1	1	0.124243	0.129338	0.133783	0.114892	0.319487	0.775874	0.775874	4.1	39.9697	0.0110912	0.00986482	0.00665132	0.032808	0.00954409	0.0121198	0.0108669	0.030575	0.121141	0.322217	0.220126	0	1	0	0	0	1
20512	TRPM3	HGNC:17992	ENSG00000083067	ENSGALG00000015126	ENSACAG00000008993	ENSNSUG00000017810	Avian	75	1283.14	0.0584504	0.433	-1.18175	0.276254	0.274039	15	1	10	1	0.0606539	0.0521568	0.0727495	0.114805	0.187074	0.252267	0.252267		0.375424	0.0497738	0.00420875	0.0148569	0.00769082	0.00339866	0.0041446	0.0045897	0.100101	0.0378478	0.0089865		1	0	0	0	0	1
20513	KLF9	HGNC:1123	ENSG00000119138	ENSGALG00000027374	ENSACAG00000000916	ENSNSUG00000017847	Avian	0	1283.14	0	0.994	-0.179822	0.00439979	0.198037	10	1	11	1	0.052145		0.0999428	0.0625				6	1.1554	0.00418019	0.0406007	0.036584	0.242592	0.029838	0.0393956	0.0128052	0.0197133	0.00134468		0.0395688	0	0	0	0	0	0
20514	SMC5	HGNC:20465	ENSG00000198887	ENSGALG00000015118	ENSACAG00000000931	ENSNSUG00000017850	Avian	75	1283.14	0.0584504	0.337	-0.114295	0.740392	0.0262143					0.0949523	0.386747	0.210431	0.41632	0.282029	0.445488	0.445488	9.6	33.2835	0.0291423	0.0279944	0.0599828	0.0441886	0.0256225	0.0215071	0.0297696	0.235516	0.0589313	0.181151	0.0919709	0	0	0	0	0	0
20515	MAMDC2	HGNC:23673	ENSG00000165072	ENSGALG00000015115	ENSACAG00000000946	ENSNSUG00000017850	Avian	0	1283.14	0	0.196	0.337879	0.136746	0.0846429	2	1	3	1	0.115639	0.123029	0.143677	0.0808111	0.20713	0.297764	0.297764		4.93591	0.0110853	0.0245994	0.0897909	0.345627	0.0940468	0.0606539	0.0180041	0.0351075	0.022617	0.090101	0.499905	0	0	0	0	0	0
20516	PTAR1	HGNC:30449	ENSG00000188647	ENSGALG00000015113	ENSACAG00000027513	ENSNSUG00000017852	Avian	0	1283.14	0	0.209	0.320243	-0.530169	0.215258	4	1	2	1	0.143306	0.237637	0.234474	0.210176	0.27962	0.480957	0.480957	6.4	4.32178	0.035237	0.0209246	0.0325632	0.0324524	0.0328153	0.028352	0.0267133	0.0725367	0.0448193	0.191317	0.0991449	0	0	0	0	0	0
20517	APBA1	HGNC:578	ENSG00000107282	ENSGALG00000015111	ENSACAG00000001040	ENSNSUG00000017853	Avian	185.04	1443.04	0.128229	0.128			0.167054	8	1	4	1	0.082907	0.152818	0.0649674	0.121376	0.198955	0.264725	0.264725	0.6	1.46936	0.00884033	0.00444539	0.0121228	0.0183477	0.00769274	0.00535902	0.00904862	0.0494331	0.00130932	0.0358669	0.0463396	0	0	0	1	0	0
20518	FAM189A2	HGNC:24820	ENSG00000135063	ENSGALG00000015110	ENSACAG00000001191	ENSNSUG00000017854	Avian	0	1443.04	0				0.0945714					0.125213	0.471906	0.180695	0.265734	0.413484	0.573675	0.573675	0.9	5.63574	0.00247507	0.0280044	0.041702	0.0319948	0.0202994	0.0107503	0.0108159	0.0214004	0.00665292	0.209076	0.217437	0	0	0	0	0	0
20519	TJP2	HGNC:11828	ENSG00000119139	ENSGALG00000015109	ENSACAG00000001252	ENSNSUG00000018034	Avian	0	1443.04	0	0.302	-0.401123	-0.58999	0.0995833	1	1	1	1	0.105255	0.120792	0.107448	0.326129	0.403823			7.2	117.268	0.0269222	0.015936	0.0258159	0.013278	0.0163935	0.00760639	0.0289285	0.0376218	0.0635107		0.0110502	0	1	0	0	0	0
20520	FXN	HGNC:3951	ENSG00000165060	ENSGALG00000015108	ENSACAG00000001257	ENSNSUG00000018034	Avian	0	1443.04	0	0.317	-0.90361	-1.20986	0.024463					0.203025	0.152944	0.334141	0.463702	0.223358	0.540137	0.540137	23	51.9466	0.0307985	0.0354822	0.0353728	0.0204492	0.0277932	0.0199254	0.020493	0.0208147	0.0213797	0.182637	0.253324	0	0	0	0	0	0
20521	PIP5K1B	HGNC:8995	ENSG00000107242	ENSGALG00000015107	ENSACAG00000001281	ENSNSUG00000018035	Avian	0	1443.04	0	0.18	0.903734	0.0262764	0.171769	14	1	14	1	0.0288349	0.0951595	0.0834818	0.148159	0.319997	0.334712	0.334712	29.5	25.7713	0.0621324	0.00620538	0.0014875	0.00240278	0.00669483	0.0324025	0.00288214	0.0211616	0.154491	0.0743613	0.0841297	0	0	0	0	0	0
20522	TMEM252	HGNC:28537	ENSG00000181778	ENSGALG00000049973	ENSACAG00000029180	ENSNSUG00000018038	Avian	0	1443.04	0		-0.365387	-0.879791	0.0994348					0.312825		0.197056	0.0625				0.5		0.000901197	0.0562335	0.00169166	0.244973	0.0865786	0.136394	0.00799724					0	0	0	0	0	0
20523	PGM5	HGNC:8908	ENSG00000154330	ENSGALG00000014995	ENSACAG00000001410	ENSNSUG00000018044	Avian	0	1443.04	0	0.428			0.0201538					0.031211	0.143744	0.0515387	0.148812	0.251833	0.751903	0.751903		0.601196	0.00196397	0.134282	0.00896315	0.176013	0.0996599	0.18155	0.0122745	0.0831282	0.0468364	0.33249	0.100483	0	0	0	0	0	0
20524	CBWD1	HGNC:17134	ENSG00000147996	ENSGALG00000010147	ENSACAG00000001658	ENSNSUG00000005944	Avian	0	1443.04	0	0.124			0.0154					0.288761	0.114892		0.235166	0.618484			6.9	11.1801	0.0320234	0.034511	0.0227756	0.0296459	0.0202331	0.0233037	0.02626	0.0197741	0.0260406			0	0	0	0	0	0
20525	DOCK8	HGNC:19191	ENSG00000107099	ENSGALG00000010156	ENSACAG00000001924	ENSNSUG00000018049	Avian	0	1443.04	0	0.407			0.0364375					0.0719957	0.0936364	0.137443	0.111549	0.146567	0.627377	0.627377	0.2	0.18212	0.0289845	0.0155537	0.00512377	0.0517678	0.0134297	0.00756339	0.022293	0.0652623	0.0159357	0.398485	0.0471378	1	0	0	1	0	0
20526	KANK1	HGNC:19309	ENSG00000107104	ENSGALG00000010158	ENSACAG00000002270	ENSNSUG00000018050	Avian	0	1443.04	0	0.53	-1.37549	-2.53125	0.27375	11	1	9	1	0.146491	0.179483	0.167942	0.213822	0.498433	0.406462	0.406462	5.7	40.0827	0.0107359	0.0289944	0.0119033	0.0450156	0.0425768	0.0280606	0.0356207	0.043836	0.0481723	0.615063	0.182087	0	0	0	0	0	0
20527	DMRT1	HGNC:2934	ENSG00000137090	ENSGALG00000010160	ENSACAG00000002356	ENSNSUG00000018051	Avian	0	1443.04	0	0.414	-0.0471256	-1.39803	0.011	1				0.123179	0.201708	0.205277		0.117189			0.8	7.83806	0.991684			0.0235963				0.918372	0.328339			0	0	0	0	1	0
20528	DMRT3	HGNC:13909	ENSG00000064218	ENSGALG00000010161	ENSACAG00000002401	ENSNSUG00000018056	Avian	0	1443.04	0	0.145	0.031107	-1.03682	0.332071	9	1	10	1	0.0445046	0.0840217	0.10516		0.123776	0.304218	0.304218		1.30677	0.422745			0.033214	0.0141235	0.00647343	0.00134645			0.056136		0	0	0	0	1	0
20529	DMRT2	HGNC:2935	ENSG00000173253	ENSGALG00000026790	ENSACAG00000002411	ENSNSUG00000018057	Avian	0	1443.04	0	0.265	0.493895	-0.920444	0.00572727	4	1	7	1	0.157049	0.218572	0.200272	0.0738535					0.117873	0.0308318	0.00219957	0.00040629	0.0039921	0.00178502	0.000920542	0.00272776	0.00593233	0.0129488		0.00125179	0	0	0	0	0	0
20530	SMARCA2	HGNC:11098	ENSG00000080503	ENSGALG00000010164	ENSACAG00000002423	ENSNSUG00000018108	Avian	0	1443.04	0	1	0.819895	0.310876	0.2863	17	1	12	1	0.0351759	0.0275229	0.044939	0.245628	0.537263	0.610784	0.610784	4.8	4.01689	0.0375373	0.0205092	0.0498857	0.0383602	0.0179057	0.0173383	0.0165588	0.0553435	0.0786908	0.191565	0.113846	0	0	0	1	0	0
20531	VLDLR	HGNC:12698	ENSG00000147852	ENSGALG00000010166	ENSACAG00000003015	ENSNSUG00000019901	Avian	0	1443.04	0	0.281	0.406897	-0.679317	0.18114	6	1	7	1	0.0505689	0.114259	0.161379	0.136249	0.461454	0.546071	0.546071	0.8	10.4834	0.0196286	0.0288095	0.112351	0.0422908	0.00969919	0.00549563	0.0136352	0.0195115	0.618401	0.201229	0.00701589	0	0	0	1	0	0
20532	KCNV2	HGNC:19698	ENSG00000168263	ENSGALG00000010173	ENSACAG00000003138	ENSNSUG00000019916	Avian	0	1443.04	0	0.42	-0.388585	-1.38225						0.0918145	0.0210385	0.13849			0.579679	0.579679	4.4	0.465155	0.613982	0.011244	0.0575472	0.0227255	0.0325727	0.0198746	0.0250514			0.0775013	0.0349014	0	0	0	0	0	0
20533	PUM3	HGNC:29676	ENSG00000080608	ENSGALG00000010178	ENSACAG00000003174	ENSNSUG00000019917	Avian	0	1443.04	0	0.588	-0.645065	-1.22732	0.0121					0.0941991	0.180109	0.151779	0.539211	0.525961	0.675401	0.675401	149.2	192.692								0.0643769	0.30163	0.177211	0.1709	0	0	0	0	0	0
20534	RFX3	HGNC:9984	ENSG00000080298	ENSGALG00000010179	ENSACAG00000003262	ENSNSUG00000019919	Avian	375.9	1443.04	0.260492	0.934	-0.0236255	-0.051626	0.3405	35	1	27	1	0.0155773	0.0425139	0.0361488	0.0814236	0.167853	0.254257	0.254257	0.7	5.72155	0.150614	0.0246218	0.0300016	0.018927	0.0298748	0.0182073	0.0165971	0.4838	0.024199	0.0167424	0.413829	1	0	0	1	0	0
20535	GLIS3	HGNC:28510	ENSG00000107249	ENSGALG00000010180	ENSACAG00000003374	ENSNSUG00000019925	Avian	0	1443.04	0	0.515	0.198469	-0.510419	0.1606			5	1	0.175413	0.457006	0.227452	0.197422	0.132938	0.369372	0.369372		0.108219	0.0256598	0.0481103	0.0506867	0.0322287	0.0259924	0.00848119	0.0118885	0.0215135	0.00131122	0.0111283	0.333397	0	1	0	1	0	0
20536	SLC1A1	HGNC:10939	ENSG00000106688	ENSGALG00000010187	ENSACAG00000003433	ENSNSUG00000019926	Avian	0	1443.04	0	0.293	0.33439	-1.04789	0.230292	3	1			0.100625	0.147279	0.147573	0.144045	0.206094	0.360369	0.360369		2.99175	0.00126489	0.0181773	0.00136118	0.00262486	0.00448299	0.00708403	0.00292653	0.00336935	0.000361411	0.0238014	0.0698135	0	0	0	0	0	0
20537	CDC37L1	HGNC:17179	ENSG00000106993	ENSGALG00000014448	ENSACAG00000003578	ENSNSUG00000019929	Avian	269.7	1443.04	0.186897	0.102	-0.0166073	-0.154844	0.327679	10	1	11	1	0.143003	0.248627	0.0651219	0.450748	0.187522	0.63456	0.63456	26.2	26.009	0.0243653	0.0323948	0.0205739	0.0612416	0.023258	0.0249776	0.0166203	0.178469	0.172899	0.268612	0.252467	0	0	0	0	0	0
20538	AK3	HGNC:17376	ENSG00000147853	ENSGALG00000014447	ENSACAG00000003605	ENSNSUG00000019930	Avian	0	1443.04	0	0.332	-0.604728	-0.216525	0.118618					0.0935658	0.116453	0.19205	0.319212	0.29496	0.402478	0.402478	0.3	5.70028	0.00380828	0.024653	0.0260343	0.0281808	0.0208071	0.0262385	0.0197778	0.00668845	0.0317114	0.105078	0.244768	0	0	0	0	0	0
20539	RCL1	HGNC:17687	ENSG00000120158	ENSGALG00000015024	ENSACAG00000003640	ENSNSUG00000019932	Avian	0	1443.04	0	0.473	0.67928	-0.70537	0.00905405					0.031887	0.083006		0.1472	0.281533	0.441666	0.441666	70.6	152.098	0.0349371	0.0139911	0.03724	0.0364416	0.0155527	0.0131251	0.023531	0.0313485	0.0376966	0.116421	0.0612116	1	0	0	0	0	0
20540	JAK2	HGNC:6192	ENSG00000096968	ENSGALG00000015027	ENSACAG00000003673	ENSNSUG00000019934	Avian	0	1443.04	0	0.948	-0.416626	-2.53125	0.0871724	1	1			0.0604989	0.0654262	0.0802964	0.292252	0.235417	0.741001	0.741001	0.8	7.96946	0.0243202	0.0168754	0.0309124	0.116961	0.021563	0.0223349	0.0257179	0.0192933	0.0107559	0.334212	0.0638229	0	0	0	0	0	0
20541	RLN3	HGNC:17135	ENSG00000171136	ENSGALG00000015028	ENSACAG00000015658	ENSNSUG00000019934	Avian	0	1443.04	0	0.13	-0.481671	-2.53125				1		0.12013	0.461202	0.216921			0.25		0.7	3.27956	0.332365	0.0750191		0.0677186		0.0304018		0.0249168	0.00607344			0	0	0	0	0	0
20542	PLGRKT	HGNC:23633	ENSG00000107020		ENSACAG00000003966	ENSNSUG00000019935	Avian	0	1443.04	0				0.0502368					0.185582			0.395738		0.44052	0.44052	13.7		0.00880796	0.0273408	0.0182516	0.012672	0.0175748	0.0226679	0.0246621			0.243198	0.144548	0	0	0	0	0	0
20543	CD274	HGNC:17635	ENSG00000197646	ENSGALG00000015032	ENSACAG00000029075	ENSNSUG00000019739	Avian	0	1443.04	0	0.03	-0.424349	-1.02796	0.117308					0.43295	0.298878	0.330521		0.164615			0.1	0.269562	0.0109561	0.008053	0.00990117	0.0189352	0.00933443	0.00685315	0.0115317		0.00747197			0	0	0	1	0	0
20544	RIC1	HGNC:17686	ENSG00000107036	ENSGALG00000015036	ENSACAG00000003988	ENSNSUG00000019937	Avian	0	1443.04	0		-0.618753	-0.077496						0.0867769	0.098482	0.086009	0.373005	0.559096	0.507444	0.507444		13.0434	0.0332733	0.0281868	0.0299755	0.0721659	0.0327692	0.029255	0.0276889	0.0222787	0.0157376	0.173137	0.0977752	1	0	0	1	0	0
20545	ERMP1	HGNC:23703	ENSG00000099219	ENSGALG00000000438	ENSACAG00000004052	ENSNSUG00000019939	Avian	0	1443.04	0	0.142	-0.761591	0.534367	0.0633871			1		0.148292	0.250246		0.293245	0.353265	0.283649	0.283649	1.9	34.3833	0.0325573	0.0105416	0.0162603	0.00995115	0.0120828	0.00850337	0.0396036	0.0792892	0.118267	0.881371	0.0180872	0	0	0	0	0	0
20546	SLC16A7	HGNC:10928		ENSGALG00000015045		ENSNSUG00000018535	Avian	0	1443.04	0	0.059			0.150048					0.219214	0.232725							0.796927	0.0793768	0.00978903	0.0118533	0.0135921	0.0195232	0.0142178	0.0174345					0	0	0	1	0	0
20547	MLANA	HGNC:7124	ENSG00000120215	ENSGALG00000019756	ENSACAG00000004131	ENSNSUG00000017206	Avian	0	1443.04	0	0.113	-0.397357	0.214678	0.0076					0.544114	0.546806				0.309888				0.0228002	0.00869837	0.00954819	0.01549	0.011222	0.00976151	0.0131621		0.113178	0.193256		0	1	0	0	0	0
20548	KIAA2026	HGNC:23378	ENSG00000183354	ENSGALG00000015050	ENSACAG00000004132	ENSNSUG00000019940	Avian	0	1443.04	0	0.401	-0.707948	-0.0887444	0.269091	12	1	8	1	0.309593	0.288743	0.296153		0.571348	0.71141	0.71141	2.8	7.4661	0.0492993	0.0232843	0.0354252	0.0459376	0.0312465	0.0225642	0.0250747	0.0745926	0.0153426	0.264604	0.108643	0	0	0	1	0	0
20549	UHRF2	HGNC:12557	ENSG00000147854	ENSGALG00000015052	ENSACAG00000004142	ENSNSUG00000019944	Avian	145.04	1443.04	0.10051	0.215	-0.038083	-0.0515628	0.4987	13	1	8	1	0.116117	0.112129	0.0750995	0.399496	0.54091	0.584186	0.584186	5.5	17.5141	0.0348318	0.0355769	0.0347112	0.0596967	0.0306522	0.0298255	0.0262086	0.0252318	0.0337183	0.158857	0.154034	0	0	0	1	0	0
20550	GLDC	HGNC:4313	ENSG00000178445	ENSGALG00000015053	ENSACAG00000004393	ENSNSUG00000019946	Avian	0	1443.04	0	0.457	-2.62354	-2.53125	0.108	4	1			0.0699001	0.0614664	0.0941526	0.115806	0.162949	0.362158	0.362158	1.7	14.8409	0.0185979	0.000569365	0.000435313	0.00124297	0.000440303	0.000459151	0.000325576	0.00290954	0.026209	0.081196	0.0549338	0	0	0	0	0	0
20551	KDM4C	HGNC:17071	ENSG00000107077	ENSGALG00000020557	ENSACAG00000004592	ENSNSUG00000019947	Avian	0	1443.04	0		-2.00369	-2.53125	0.0104286					0.157007	0.218723	0.12582	0.451405	0.513666	0.511771	0.511771	9.6	1.27414	0.0183927	0.0233245	0.0237119	0.0288563	0.0246872	0.0266784	0.0268607	0.0324411	0.0733852	0.186413	0.112748	0	0	0	0	0	0
20552	PTPRD	HGNC:9668	ENSG00000153707	ENSGALG00000015058	ENSACAG00000004644	ENSNSUG00000020025	Avian	0	1443.04	0	0.838	2.37448	0.830942	0.445629	37	1	42	1	0.0199946	0.0300312	0.0716532	0.161166	0.186132	0.275278	0.275278	0.1	0.745604	0.0057081	0.00731399	0.0305206	0.0035799	0.00698891	0.00191247	0.00476928	0.0104059	0.0076542	0.0417176	0.0479198	0	1	0	0	0	0
20553	TYRP1	HGNC:12450	ENSG00000107165	ENSGALG00000015205	ENSACAG00000011322	ENSNSUG00000020055	Avian	0	1443.04	0	0.374	-0.472251	-0.836556	0.0281875					0.190141	0.0780998	0.119546	0.0730862	0.209122	0.254599	0.254599		0.0378037	0.00690382	0.000620112	0.000451111	0.00223242	0.000499432	0.000502283	0.000395338			0.00445482	0.0231629	0	0	0	0	0	0
20554	LURAP1L	HGNC:31452	ENSG00000153714	ENSGALG00000029932	ENSACAG00000011314	ENSNSUG00000020056	Avian	0	1443.04	0		0.340058	-0.00624538	0.18036					0.0673169	0.0980933	0.114442	0.335309		0.322782	0.322782			0.00131655	0.0139216	0.00861727	0.050253	0.014174	0.0436708	0.0224372		0.00514921	0.068758	0.346187	0	0	0	0	0	0
20555	MPDZ	HGNC:7208	ENSG00000107186	ENSGALG00000005846	ENSACAG00000011304	ENSNSUG00000020067	Avian	0	1443.04	0	0.32	-0.557961	0.759665	0.0214			1	1	0.150588	0.221441	0.180837	0.329248	0.300106	0.277373	0.277373	2	14.4869	0.0165267	0.0362344	0.0334849	0.0761465	0.0376283	0.0339218	0.0107639	0.107527	0.363444	0.044083	0.131475	1	0	0	1	0	0
20556	NFIB	HGNC:7785	ENSG00000147862	ENSGALG00000005441	ENSACAG00000017798	ENSNSUG00000020094	Avian	0	1443.04	0	0.92	0.916322	0.740084	0.334439	61	1	60	1	0.0582222	0.147801	0.0909906	0.0789023	0.695697	0.629776	0.629776		0.125216	0.0025503	0.0330236	0.0221149	0.0709123	0.0236791	0.0209089	0.0149567	0.0586429	0.0263709	0.154573	0.0696052	1	0	0	1	0	0
20557	ZDHHC21	HGNC:20750	ENSG00000175893	ENSGALG00000027428	ENSACAG00000017794	ENSNSUG00000020111	Avian	0	1443.04	0	0.112	0.62989	0.902116	0.15434	4	1	2		0.0264798	0.152164	0.151107	0.435432		0.330298	0.330298		1.02067	0.0168224	0.0175667	0.0200438	0.0218985	0.0216682	0.0181237	0.0319591	0.0602613	0.034396	0.243108	0.0726327	0	0	0	1	0	0
20558	CER1	HGNC:1862	ENSG00000147869	ENSGALG00000005434	ENSACAG00000017792	ENSNSUG00000020112	Avian	0	1443.04	0	0.257	-0.61561	0.711376						0.28459	0.5	0.414552						25.6054	0.0433132			0.0163284	0.042178	0.0270383	0.0103857					0	0	0	0	0	0
20559	FREM1	HGNC:23399	ENSG00000164946	ENSGALG00000005426	ENSACAG00000017780	ENSNSUG00000011384	Avian	0	1443.04	0	0.085	-1.50238	-0.738812	0.0562333					0.261924	0.262012	0.17949	0.220602	0.397044				0.0608585	0.0509128	0.0051902	0.00402304	0.0353059	0.0430199	0.0238111	0.00768258	0.0269826	0.0175522		0.202484	0	0	1	0	0	0
20560	TTC39B	HGNC:23704	ENSG00000155158	ENSGALG00000005416	ENSACAG00000017770	ENSNSUG00000011390	Avian	0	1443.04	0		0.486576	-0.619876	0.011587	1		2	1	0.097292	0.117844	0.138961	0.412366	0.333276	0.681628	0.681628	2.6	0.958309	0.0410694	0.0159306	0.0205927	0.0496907	0.0209158	0.0188018	0.0503978	0.0445311	0.00390799	0.167537	0.00967943	0	0	0	0	0	0
20561	SNAPC3	HGNC:11136	ENSG00000164975	ENSGALG00000011323	ENSACAG00000017765	ENSNSUG00000011397	Avian	0	1443.04	0	0.155	0.104781	0.290355	0.061625					0.15177	0.0852133	0.135844	0.177293		0.808792	0.808792	16.5	9.0591	0.105597	0.0217189	0.0233238	0.0135627	0.0250599	0.0257528	0.0239619	0.0209193	0.0604909	0.299269	0.143159	0	0	0	0	0	0
20562	PSIP1	HGNC:9527	ENSG00000164985	ENSGALG00000015105	ENSACAG00000017757	ENSNSUG00000011400	Avian	0	1443.04	0	0.989	1.29843	-0.248078	0.182923			1	1	0.0732961	0.119048	0.156139	0.31559	0.23106	0.655356	0.655356	6.6	78.4529	0.0537086	0.0156045	0.0344817	0.0495151	0.0232821	0.0235743	0.0118709	0.245905	0.19575	0.257744	0.198962	0	0	0	0	0	0
20563	CCDC171	HGNC:29828	ENSG00000164989	ENSGALG00000015103	ENSACAG00000017752	ENSNSUG00000011418	Avian	0	1443.04	0		-1.32647	-0.936184	0.15341	21		18		0.123233	0.634277		0.0625	0.161434	0.604431	0.604431	0.8	1.26896	0.289341	0.0109795	0.0277824	0.0200648	0.0666244	0.014255	0.0152276	0.320372		0.270118	0.156195	0	1	0	0	0	0
20564	BNC2	HGNC:30988	ENSG00000173068	ENSGALG00000015101	ENSACAG00000017743	ENSNSUG00000011434	Avian	0	1443.04	0	0.533	0.576991	0.45811	0.264	32	1	24	1	0.0341168	0.0416323	0.197527	0.130594	0.226763				0.0197028	0.0497556	0.043923	0.107058	0.136066	0.111285	0.0695421	0.0168627	0.168755	0.17962		0.295777	0	0	0	0	0	0
20565	CNTLN	HGNC:23432	ENSG00000044459	ENSGALG00000015097	ENSACAG00000017738	ENSNSUG00000011449	Avian	0	1443.04	0	0.17	-1.33375	0.459494	0.00341935	1	1			0.252056			0.241463	0.128774			4.1	2.6413	0.0487357	0.0262676	0.0498738	0.0974515	0.0406327	0.0399449	0.0179481	0.0959954			0.242912	0	0	0	0	0	0
20566	SH3GL2	HGNC:10831	ENSG00000107295	ENSGALG00000015096	ENSACAG00000017719	ENSNSUG00000011449	Avian	0	1443.04	0	0.266	-0.377853	-0.320184	0.167625	4	1	4	1	0.0213115	0.0254582	0.137419	0.0625	0.122844	0.254191	0.254191	0.5	0.69705	0.00675074	0.00222925	0.00109696	0.0139276	0.000443365	0.000370482	0.000178029	0.0140305	0.00177151	0.00878155	0.00155488	0	0	0	0	0	0
20567	ADAMTSL1	HGNC:14632	ENSG00000178031	ENSGALG00000020554	ENSACAG00000027734	ENSNSUG00000011470	Avian	0	1443.04	0		-0.983893	-1.29212	0.204133	6	1	3	1	0.0768425			0.0879977	0.111111	0.360543	0.360543		0.0945435	0.0183213	0.0495389	0.00494348	0.0432478	0.0165514	0.00315434	0.00178133	0.164693	0.0156148	0.265686	0.181873	1	0	0	1	1	0
20568	SAXO1	HGNC:28566	ENSG00000155875	ENSGALG00000027314		ENSNSUG00000011476	Avian	0	1443.04	0	0.157	-1.5615	-1.05003	0.0222857					0.502046			0.0633404				2.7	0.105479								0.423206				0	0	0	0	0	0
20569	HAUS6	HGNC:25948	ENSG00000147874	ENSGALG00000015091	ENSACAG00000010781	ENSNSUG00000011481	Avian	0	1443.04	0		-0.542306	-1.41583	0.0626667					0.456875	0.674054	0.305812	0.205619	0.152005	0.600731	0.600731	6.9	71.1822	0.0776765	0.0195565	0.0313505	0.0347147	0.0290543	0.0218724	0.0220328	0.0676344	0.0734342	0.221747	0.099352	1	0	0	1	0	0
20570	PLIN2	HGNC:248	ENSG00000147872	ENSGALG00000015090	ENSACAG00000017672	ENSNSUG00000011483	Avian	0	1443.04	0		-2.18619	-1.36085	0.0285714					0.161233	0.282645	0.148019	0.411839	0.42383	0.302371	0.302371	395.3	257.651	0.00626055	0.00731758	0.00942525	0.0184303	0.0131798	0.00799045	0.00712843	0.0215982	0.0346701	0.130284	0.0385075	0	0	0	0	0	0
20571	DENND4C	HGNC:26079	ENSG00000137145	ENSGALG00000015083	ENSACAG00000017643	ENSNSUG00000011489	Avian	0	1443.04	0	0.318	0.39063	-2.53125	0.180667					0.140486	0.161761		0.0625	0.399374	0.70327	0.70327	6.9	4.87851	0.022224	0.0243636	0.0405573	0.0655448	0.034607	0.0339834	0.0301346	0.0985899	0.0546058	0.227531	0.0992199	1	0	0	0	0	0
20572	RPS6	HGNC:10429	ENSG00000137154	ENSGALG00000015082	ENSACAG00000017634	ENSNSUG00000011495	Avian	0	1443.04	0		0.698643	-2.53125	0.0293043	2	1				0.00910295		0.1484	0.48394	0.623183	0.623183	2915.6	2627.32	0.0135889	0.0338881	0.0656121	0.0355435	0.0268004	0.0235065	0.0326262	0.0255469	0.0395792	0.178388	0.616728	0	0	0	0	0	0
20573	ACER2	HGNC:23675	ENSG00000177076	ENSGALG00000015081	ENSACAG00000017629	ENSNSUG00000011520	Avian	0	1443.04	0		-0.034375	-2.53125	0.255054					0.0658565		0.0268707			0.517406	0.517406	5.2	2.55723	0.0217043	0.0122032	0.00890829	0.0133202	0.013346	0.00932955	0.0153843	0.0719057	0.0123974	0.483179	0.116767	0	0	0	0	0	0
20574	SLC24A2	HGNC:10976	ENSG00000155886	ENSGALG00000015080	ENSACAG00000017625	ENSNSUG00000011521	Avian	0	1443.04	0	0.216	-0.0698762	-1.52524	0.195707	2	1			0.129761	0.178783	0.136808		0.111111	0.251389	0.251389		0.265056	0.00206915	0.000937753	0.000939888	0.03063	0.00594798	0.00101908	0.000844919	0.120261	0.0281642		0.0148738	0	0	0	0	0	0
20575	MLLT3	HGNC:7136	ENSG00000171843	ENSGALG00000015078	ENSACAG00000017614	ENSNSUG00000011536	Avian	0	1443.04	0	0.431	-0.0892048	-0.13342	0.220806	12	1	16	1	0.0222154	0.2839		0.42565	0.132506	0.460822	0.460822	0.5	3.18525	0.00926626	0.0290792	0.0212724	0.0505712	0.0282577	0.0336156	0.0189417	0.195216	0.209355	0.542509	0.082306	0	0	0	0	0	0
20576	FOCAD	HGNC:23377	ENSG00000188352	ENSGALG00000015071	ENSACAG00000017585	ENSNSUG00000011537	Avian	0	1443.04	0		-1.65832	-0.823937	0.048037					0.209403	0.222838	0.181931	0.302298	0.551269	0.734835	0.734835	3	16.2372	0.0244136	0.0249045	0.0184886	0.0106819	0.0220774	0.0166911	0.0190382	0.0324226	0.12786	0.280029	0.181806	1	0	0	1	0	0
20577	HACD4	HGNC:20920	ENSG00000188921	ENSGALG00000028142	ENSACAG00000028887	ENSNSUG00000011540	Avian	0	1443.04	0		-1.20392	0.38482						0.168067	0.249598	0.254861	0.257327		0.723153	0.723153		1.28659	0.0101055	0.0349567	0.0393848	0.052562	0.0273623	0.0636428	0.0274049	0.0175534	0.0193623	0.345708	0.195115	0	0	0	0	0	0
20578	IFNE	HGNC:18163	ENSG00000184995	ENSGALG00000015062	ENSACAG00000017572	ENSNSUG00000011541	Avian	0	1443.04	0		-0.520188	0.638489	0.0236579					0.88997	0.325231	0.566292							0.0103006	0.0124996	0.00426521	0.0191936			0.0692059					0	0	0	0	0	0
20579	MTAP	HGNC:7413	ENSG00000099810	ENSGALG00000008174	ENSACAG00000017549	ENSNSUG00000007179	Avian	0	1443.04	0	0.143	-1.0604	0.240708	0.0329737					0.061756	0.102469	0.0743915	0.383852	0.33615	0.641079	0.641079	1	28.0345	0.0191195	0.0324274	0.0332827	0.0525819	0.0320318	0.0330435	0.0354619	0.0233071	0.0514671	0.275574	0.108887	0	0	0	0	0	0
20580	ELAVL2	HGNC:3313	ENSG00000107105	ENSGALG00000015799	ENSACAG00000017521	ENSNSUG00000007193	Avian	0	1443.04	0	0.519	1.21099	-0.70534	0.496212	30	1	37	1	0.00688924	0.0914065	0.208345	0.0625	0.136903	0.254601	0.254601	1.2	1.58307	0.125775	0.000338958	0.00253971	0.000596779	0.000642889	0.000406822	0.000664945	0.125933	0.0591103	0.015557	0.00121427	1	0	0	0	0	0
20581	CDKN2B	HGNC:1788	ENSG00000147883	ENSGALG00000026137	ENSACAG00000017544	ENSNSUG00000007188	Avian	0	1443.04	0	0.479	-0.293291	-0.0638847	0.054303	4	1	2	1	0.0991798	0.100885							0.102588	0.0321474	0.0109836	0.0030038	0.0100538	0.0097767	0.00512597	0.090981					0	0	0	0	0	0
20582	TUSC1	HGNC:31010	ENSG00000198680			ENSNSUG00000006204	Avian	0	1443.04	0	0.06			0.0177					0.153691							2.3	16.9774	0.0596699	0.0348037	0.0326581	0.0939346	0.0380126	0.0286492	0.0214658					0	0	0	0	0	0
20583	LOC113428225	NCBI:113428225		ENSGALG00000050892		ENSNSUG00000013071	Avian	0	1443.04	0																													0	0	0	0	0	0
20584	CAAP1	HGNC:25834	ENSG00000120159	ENSGALG00000001765	ENSACAG00000017515	ENSNSUG00000007196	Avian	0	1443.04	0		0.862872	-0.191029	0.0591875					0.184509	0.152792	0.0975207	0.379929	0.206082	0.479401	0.479401	23.5	32.7886	0.039319	0.0215354	0.0178386	0.0143358	0.0211289	0.020013	0.0242368	0.346319	0.127179	0.214024	0.0876746	0	0	0	0	0	0
20585	PLAA	HGNC:9043	ENSG00000137055	ENSGALG00000001782	ENSACAG00000017506	ENSNSUG00000007197	Avian	0	1443.04	0	0.137	0.913101	-0.0863922	0.121405			3	1	0.0785752	0.147824	0.122797	0.401698	0.399416	0.672841	0.672841	11.4	45.5504	0.0419489	0.0246036	0.0185079	0.0300513	0.0291557	0.0271707	0.0305053	0.024438	0.0652245	0.371559	0.17718	0	0	0	0	0	0
20586	LRRC19	HGNC:23379	ENSG00000184434	ENSGALG00000045028	ENSACAG00000028864	ENSNSUG00000007199	Avian	0	1443.04	0	0.051	-0.458074	-0.906153	0.0244					0.389855	0.0149603	0.519832							0.00310946	0.00366223	0.00309492	0.00274451	0.00232628	0.00387438	0.00288783	0.0134374			0.00224244	0	0	0	0	0	0
20587	IFT74	HGNC:21424	ENSG00000096872	ENSGALG00000001801	ENSACAG00000028763	ENSNSUG00000007198	Avian	0	1443.04	0	0.227	0.0245375	-0.642346	0.0418667	1	1	1	1	0.127673	0.296546	0.0482874	0.220089	0.142993	0.448818	0.448818	2.1	11.7087	0.16064	0.0278265	0.0250674	0.0137379	0.0215821	0.0259116	0.021355	0.395702	0.13172	0.120278	0.236672	0	0	0	0	1	0
20588	TEK	HGNC:11724	ENSG00000120156	ENSGALG00000001840	ENSACAG00000017459	ENSNSUG00000007205	Avian	0	1443.04	0	0.886	0.0141722	-2.15118	0.118368					0.0828691	0.0744062		0.385047	0.283769	0.600286	0.600286	0.2	0.0545795	0.00444013	0.0143792	0.00910838	0.0619846	0.0216037	0.0102477	0.0105213	0.00432362	0.00653102	0.416468	0.0268477	0	0	0	0	0	0
20589	MOB3B	HGNC:23825	ENSG00000120162	ENSGALG00000001856	ENSACAG00000010761	ENSNSUG00000007210	Avian	0	1443.04	0		0.403671	0.423157	0.13459			3	1	0.0137508		0.0162652		0.373056	0.458324	0.458324	2.2	3.33453	0.0124913	0.00931637	0.0715486	0.0471228	0.0232074	0.0165308	0.0152014	0.0188671	0.0470913	0.270999	0.125723	0	0	0	0	0	0
20590	C9orf72	HGNC:28337	ENSG00000147894	ENSGALG00000001864	ENSACAG00000010697	ENSNSUG00000007233	Avian	0	1443.04	0	0.219	-1.43366	-0.297509	0.129714	1	1	1	1	0.0187177	0.0390441	0.0434535	0.330707	0.447481	0.58356	0.58356	5.9	3.61478	0.0289799	0.0191784	0.0420462	0.0488053	0.0170361	0.0223573	0.0183623	0.0127137	0.00231343	0.428405	0.0871291	0	0	0	0	0	0
20591	LINGO2	HGNC:21207	ENSG00000174482	ENSGALG00000001869	ENSACAG00000010691	ENSNSUG00000007249	Avian	0	1443.04	0	0.896			0.1782	3		1		0.0338934	0.093761	0.0716511		0.122491	0.27184	0.27184	1.6	0.424471	0.0808055	0.0122131	0.00289621	0.00683496	0.327379	0.00494092	0.00932394	0.0218234	0.0129187	0.0351227		1	0	0	0	0	0
20592	LOC103280019	NCBI:103280019			ENSACAG00000001964	ENSNSUG00000007255	Avian	0	1443.04	0																													0	0	0	0	0	0
20593	DDX58	HGNC:19102	ENSG00000107201		ENSACAG00000001354	ENSNSUG00000007261	Avian	0	1443.04	0	0.72	0.496873	0.864808	0.0151739					0.206595		0.251194	0.190464		0.617059	0.617059	2.1		0.0135683	0.0195016	0.0249486	0.0337733	0.0317794	0.0329578	0.03019			0.10323	0.162731	0	0	0	1	0	0
20594	ACO1	HGNC:117	ENSG00000122729	ENSGALG00000002162	ENSACAG00000001541	ENSNSUG00000007256	Avian	0	1443.04	0	0.207	-0.140757	0.463869	0.0993529	1	1			0.0616499	0.0543159	0.0738444	0.261944	0.272541	0.301497	0.301497	4.7	39.735	0.0189304	0.024691	0.0140959	0.0098818	0.017856	0.0252932	0.0111428	0.0158574	0.0142879	0.0745653	0.0604343	1	0	0	0	0	0
20595	DGKQ	HGNC:2856	ENSG00000145214	ENSGALG00000002142	ENSACAG00000000256	ENSNSUG00000015451	Avian	0	1443.04	0	0.072	0.720691	-0.962987	0.0455357					0.108683	0.132392	0.157536		0.400371	0.434412	0.434412	1	3.23449	0.020766	0.0174651	0.0144829	0.0118366	0.0204026	0.0149395	0.0282279	0.129548	0.446783	0.171048	0.121793	0	0	0	0	0	0
20596	TDRD7	HGNC:30831	ENSG00000196116	ENSGALG00000012350	ENSACAG00000001003	ENSNSUG00000015396	Avian	0	1443.04	0	0.197	0.166599	0.633082	0.886			1	1	0.13869	0.428137	0.242749	0.242748	0.266447	0.560639	0.560639	3.5	9.51485	0.121384	0.0173499	0.0208017	0.0253783	0.0254784	0.0280493	0.0236837	0.153548	0.211969	0.142944	0.179054	0	0	0	1	0	0
20597	TMOD1	HGNC:11871	ENSG00000136842	ENSGALG00000002125	ENSACAG00000001018	ENSNSUG00000015395	Avian	0	1443.04	0	0.154	-0.116901	0.148502	0.14516	4	1			0.0283899	0.134455	0.0972488	0.0625	0.171631	0.665381	0.665381	9.1	45.7679	0.00305125	0.0190686	0.0349348	0.0365316	0.0380743	0.0267502	0.0121238	0.0130539	0.000993685	0.237208	0.0132137	0	0	0	1	0	0
20598	TSTD2	HGNC:30087	ENSG00000136925	ENSGALG00000002110	ENSACAG00000004543	ENSNSUG00000014191	Avian	0	1443.04	0		-0.56796	0.0900475	0.058875					0.243365	0.288572		0.236384	0.381813	0.479956		11	19.2297	0.0339123	0.0305663	0.039823	0.0559384	0.0353335	0.0314359	0.025316	0.0788644	0.1089	0.206578		0	0	0	0	0	0
20599	NCBP1	HGNC:7658	ENSG00000136937	ENSGALG00000002087	ENSACAG00000004409	ENSNSUG00000015390	Avian	0	1443.04	0	0.073	-0.179302	0.175738	0.0412143					0.018018	0.0910227	0.196449	0.324595	0.204853	0.78298	0.78298	17.2	99.5725	0.0443121	0.0223072	0.0260993	0.0218832	0.0248488	0.0238902	0.0291293	0.143196	0.0632928	0.220289	0.117544	0	0	0	0	0	0
20600	XPA	HGNC:12814	ENSG00000136936	ENSGALG00000028998	ENSACAG00000004384	ENSNSUG00000015388	Avian	0	1443.04	0	0.332	-0.0897502	0.0724352	0.018					0.102127	0.108822		0.199518		0.613135	0.613135	6.9	303.749	0.011747	0.0312607	0.0233741	0.0537506	0.024181	0.0393443	0.0233638	0.0527121	0.0429097	0.165086	0.310766	0	0	0	1	0	0
20601	HEMGN	HGNC:17509	ENSG00000136929		ENSACAG00000024269	ENSNSUG00000017902	Avian	0	1443.04	0	0.111	0.752588	0.962819	0.000666667					0.655564			0.0720729		0.462103	0.462103		5.60107	0.945968	0.00087795	0.00817404	0.0135441	0.0103931	0.00562966	0.0114909			0.541005	0.0816232	0	0	0	0	0	0
20602	FOXE1	HGNC:3806	ENSG00000178919	ENSGALG00000026252	ENSACAG00000009553	ENSNSUG00000017267	Avian	0	1443.04	0				0.038129					0.0566714	0.0137419	0.00150667					1.7	4.70402	0.00631943	0.00111021	0.000210179	0.000123155	0.000181696	0.000164544	0.0505137				0.936175	0	0	0	0	0	0
20603	SPINK4	HGNC:16646	ENSG00000122711	ENSGALG00000043964	ENSACAG00000029294	ENSNSUG00000011994	Avian	0	1443.04	0	0.09	-0.245248	-2.53125	0.004					0.547973	0.675978	0.40247					0.3	0.143586	0.000165718	5.85456e-05		0.000137456		0.000120798	8.45844e-05	0.0127925	0.00224134			0	0	0	0	0	0
20604	B4GALT1	HGNC:924	ENSG00000086062	ENSGALG00000002022	ENSACAG00000003414	ENSNSUG00000015294	Avian	0	1443.04	0	0.497	0.499658	-0.632551	0.117923					0.167346	0.0888857	0.147644	0.0816703	0.529881	0.458148	0.458148	44.4	37.9214	0.0327095	0.0378096	0.052113	0.0737567	0.0237245	0.0124033	0.0414619	0.0215871	0.0840632	0.269858	0.0400114	0	0	0	1	0	0
20605	SMU1	HGNC:18247	ENSG00000122692	ENSGALG00000002014	ENSACAG00000003444	ENSNSUG00000015295	Avian	0	1443.04	0	0.162	0.913558	1.15304	0.0183778						0.0166941	0.00954939	0.425695	0.536449	0.7172	0.7172	9.3	143.362	0.0309266	0.0306958	0.0316708	0.0478491	0.031597	0.0302824	0.0286025	0.0266086	0.0282836	0.238203	0.144275	0	0	0	0	0	0
20606	DNAJA1	HGNC:5229	ENSG00000086061	ENSGALG00000023066	ENSACAG00000003517	ENSNSUG00000015296	Avian	0	1443.04	0	0.411	0.591337	0.89004	0.0961111			1	1	0.00480035	0.0335846	0.0211796	0.558604	0.503471	0.660158	0.660158	317.1	126.682	0.0760396	0.0283396	0.0243231	0.0184486	0.0245645	0.0180774	0.0207027	0.0711447	0.161829	0.278093	0.104291	1	0	0	0	0	0
20607	APTX	HGNC:15984	ENSG00000137074	ENSGALG00000001954	ENSACAG00000003581	ENSNSUG00000015297	Avian	0	1443.04	0	0.064			0.0112778					0.28413	0.289902	0.180739	0.0625	0.139702	0.795233	0.795233	106.6	38.9874	0.0500302	0.0255662	0.0217138	0.02227	0.022435	0.0224881	0.0251798	0.300833	0.156995	0.279722	0.340455	0	0	0	1	0	0
20608	ACTL7A	HGNC:161	ENSG00000187003	ENSGALG00000006803	ENSACAG00000003601	ENSNSUG00000004564	Avian	0	1443.04	0	0.256	0.00308288	0.320432	0.01175					0.108278		0.107256		0.465576	0.38745	0.38745		0.0787473	0.994472	0.000208207	0.0444101	0.0835625	0.0270691	0.0182179	0.041051	0.726253		0.133658	0.159109	0	0	0	0	0	0
20609	ELP1	HGNC:5959	ENSG00000070061	ENSGALG00000001947	ENSACAG00000003603	ENSNSUG00000015305	Avian	0	1443.04	0	0.563	-0.691666	0.143808	0.116118					0.241003	0.247967	0.205933	0.318726	0.48315	0.737018	0.737018	7.5	57.4264	0.0231733	0.0184076	0.0411638	0.0304557	0.0214937	0.0174053	0.0195405	0.0462874	0.0590847	0.339205	0.0955875	0	0	0	0	0	0
20610	TBC1D2	HGNC:18026	ENSG00000095383	ENSGALG00000001944	ENSACAG00000004008	ENSNSUG00000015306	Avian	0	1443.04	0	0.078	-0.18678	0.120904	0.0264615					0.110381	0.21213	0.246315	0.247556	0.47938	0.393263	0.393263	2.8	4.52124	0.00878784	0.0160574	0.00716643	0.0102819	0.0111428	0.00929232	0.0478579	0.0563845	0.123323	0.635708	0.0708502	1	0	0	1	0	0
20611	CORO2A	HGNC:2255	ENSG00000106789	ENSGALG00000001933	ENSACAG00000004130	ENSNSUG00000015313	Avian	0	1443.04	0	0.125	-0.531562	0.771181	0.115594					0.111862	0.335611	0.240046		0.168359	0.332709	0.332709	1.9	7.66593	0.058514	0.0208719	0.00222765	0.00639414	0.00739846	0.00450579	0.0577631	0.0188228	0.0925979	0.0530122	0.0369589	0	0	0	1	0	0
20612	SHB	HGNC:10838	ENSG00000107338	ENSGALG00000026811	ENSACAG00000013640	ENSNSUG00000015399	Avian	0	1443.04	0	0.286	0.570435	0.188939	0.0937143			2	1	0.0312386	0.139785		0.197748		0.524555	0.524555	4.2	9.45598	0.0115403	0.0415682	0.0128905	0.0305889	0.017636	0.0219632	0.0398363	0.0281725	0.0727197	0.476595	0.095877	1	0	0	0	0	0
20613	TOMM5	HGNC:31369	ENSG00000175768	ENSGALG00000026300		ENSNSUG00000015401	Avian	0	1443.04	0		0.09203	0.547025	0.0818333					0.151653	0.0052914		0.380562		0.392183	0.392183	996.4	387.185	0.0253491	0.0260359	0.0215917	0.0174467	0.0235919	0.0289775	0.0246246	0.01113	0.0125962	0.181569	0.681711	0	0	0	0	0	0
20614	FRMPD1	HGNC:29159	ENSG00000070601	ENSGALG00000023036	ENSACAG00000012188	ENSNSUG00000015141	Avian	0	1443.04	0	0.129	0.856801	0.143801	0.00116667					0.243301	0.127406	0.293669		0.111111	0.589227	0.589227		0.40829	0.261828	0.00463963	0.00105536	0.00356076	0.000873708	0.0156441	0.00405268	0.0136349	0.00583655	0.0336806	0.520764	0	0	0	0	0	0
20615	TRMT10B	HGNC:26454	ENSG00000165275	ENSGALG00000029118	ENSACAG00000012156	ENSNSUG00000015403	Avian	0	1443.04	0		0.707954	0.280523	0.0409615					0.243773	0.192912	0.155015			0.65568	0.65568	2.2	29.17	0.0131764	0.0294338	0.0338517	0.0385244	0.0282612	0.0316336	0.0231395	0.0198086	0.0208222	0.0974984	0.314114	0	0	0	0	0	0
20616	DCAF10	HGNC:23686	ENSG00000122741	ENSGALG00000005390	ENSACAG00000012138	ENSNSUG00000015406	Avian	0	1443.04	0		0.570862	0.170894	0.149814			1	1	0.170034	0.0197008	0.0380666	0.0625	0.598108	0.629342	0.629342	0.4	19.6186	0.0970893	0.0249242	0.0278136	0.0392176	0.0309049	0.0335381	0.0264987	0.0117118	0.0145154	0.320001	0.0980922	0	0	0	0	0	0
20617	SLC25A51	HGNC:23323	ENSG00000122696	ENSGALG00000028340	ENSACAG00000012131	ENSNSUG00000015407	Avian	276.04	1443.04	0.191291		0.704199	0.140697	0.132868					0.0741191	0.0010549	0.0891089	0.0625		0.495116	0.495116	7	24.3929	0.056534	0.0195141	0.0223913	0.0145563	0.0272704	0.0214311	0.0226151	0.041072	0.0739059	0.148352	0.07881	0	0	0	0	0	0
20618	FBXO10	HGNC:13589	ENSG00000147912		ENSACAG00000012059	ENSNSUG00000008097	Avian	0	1443.04	0	0.306	0.447605	-2.53125	0.386937					0.0445441		0.0635893	0.0625		0.305555	0.305555	2.7		0.0535889	0.0205281	0.0164631	0.025298	0.0241868	0.0422844	0.0188116			0.16667	0.3484	0	1	0	0	0	0
20619	POLR1E	HGNC:17631	ENSG00000137054	ENSGALG00000005395		ENSNSUG00000015409	Avian	0	1443.04	0	0.63	0.732315	-2.53125	0.0297857					0.198258	0.107262		0.236062	0.589945	0.835135	0.835135	34.5	152.857	0.0184802	0.0385613	0.052039	0.066437	0.0396134	0.030756	0.0252156	0.0213506	0.0982488	0.259767	0.259379	1	0	0	0	0	0
20620	ZBTB5	HGNC:23836	ENSG00000168795	ENSGALG00000005354	ENSACAG00000011965	ENSNSUG00000015410	Avian	111	1443.04	0.0769209	0.255	0.0426437	0.255481	0.1775	1				0.0589201	0.00166815	0.0568182		0.463995	0.832511	0.832511	2.6	11.1825	0.0479113	0.0269987	0.0307111	0.0443572	0.024553	0.0208287	0.0382812	0.0272993	0.0256987	0.27549	0.17885	0	0	0	1	0	0
20621	GRHPR	HGNC:4570	ENSG00000137106	ENSGALG00000005423	ENSACAG00000011898	ENSNSUG00000015411	Avian	0	1443.04	0	0.103	0.737461	1.03967	0.0762333	4	1	3	1	0.150869	0.0358047	0.120905	0.317554	0.167051	0.354064	0.354064	8.9	8.83266	0.0170179	0.0261937	0.0268247	0.0283653	0.0246529	0.0208279	0.0211064	0.00541214	0.00337197	0.0307401	0.223953	0	0	0	1	0	0
20622	ZCCHC7	HGNC:26209	ENSG00000147905	ENSGALG00000005433	ENSACAG00000011894	ENSNSUG00000011384	Avian	0	1443.04	0	0.104	0.782115	0.627593	0.029					0.479904			0.436525	0.349058	0.890485	0.890485	52	18.4506	0.0457345	0.0272301	0.0358486	0.0426606	0.0282874	0.0300935	0.0231596	0.0635025	0.277696	0.263276	0.0667701	0	0	0	0	0	0
20623	PAX5	HGNC:8619	ENSG00000196092	ENSGALG00000016431	ENSACAG00000011646	ENSNSUG00000015413	Avian	0	1443.04	0	0.484	0.71805	0.643998	0.259327	12	1	12	1	0.00983146	0.0378022	0.139172	0.0914639	0.144217				0.0265698	0.0655484	0.00539043	0.00326001	0.00453854	0.00315129	0.00284722	0.00749481	0.0261293	0.000640564		0.0144988	1	0	0	0	1	0
20624	MELK	HGNC:16870	ENSG00000165304	ENSGALG00000016438	ENSACAG00000011531	ENSNSUG00000015414	Avian	0	1443.04	0	0.453	-1.07192	0.459335	0.0511					0.182177	0.383853		0.0740417	0.161194	0.255827	0.255827	64.3	27.726	0.287865	0.00630677	0.00633308	0.00328581	0.00280956	0.00442149	0.118696	0.434628	0.551912	0.0138569	0.179376	0	0	0	0	0	0
20625	RNF38	HGNC:18052	ENSG00000137075	ENSGALG00000015311	ENSACAG00000002163	ENSNSUG00000015417	Avian	175.9	1443.04	0.121895	0.464	0.0992588	0.57873	0.464469	22	1	23	1	0.0591282	0.14636	0.0302182	0.396085	0.242784	0.487443	0.487443	16.6	18.8714	0.132969	0.0269937	0.0339737	0.0652899	0.0356092	0.040157	0.0191026	0.311878	0.0766592	0.292631	0.158474	1	1	0	1	0	0
20626	TRIM14	HGNC:16283	ENSG00000106785	ENSGALG00000015315	ENSACAG00000002113	ENSNSUG00000018097	Avian	0	1443.04	0	0.365	-1.35513	-0.209321	0.0436207					0.146025	0.332225		0.23712	0.309784			1.5	4.96816	0.0300864	0.0192957	0.0144608	0.00673767	0.0151457	0.0160492	0.0460681	0.00218537	0.052263			0	0	0	1	0	0
20627	NANS	HGNC:19237	ENSG00000095380	ENSGALG00000015320	ENSACAG00000002054	ENSNSUG00000015442	Avian	0	1443.04	0	0.155	-0.845602	0.186395		NA				0.0391007	0.0693857	0.0478247	0.534623	0.340931	0.409234	0.409234	84.4	75.7078	0.0158659	0.0734352	0.0152273	0.0100306	0.0158456	0.0147084	0.0292881	0.0199509	0.197517	0.0888415	0.219584	0	0	0	0	0	0
20628	CLTA	HGNC:2090	ENSG00000122705	ENSGALG00000015326	ENSACAG00000001991	ENSNSUG00000015444	Avian	0	1443.04	0	0.153	0.339527	-0.123313	0.228	4	1	4	1	0.0202523	0.151334	0.0714187	0.521274	0.531906	0.591853	0.591853	339.3	158.331	0.0248056	0.0276514	0.031074	0.0231526	0.0253387	0.0203348	0.0262346	0.0529153	0.334483	0.122653	0.34849	0	0	0	1	0	0
20629	GNE	HGNC:23657	ENSG00000159921	ENSGALG00000015331	ENSACAG00000001857	ENSNSUG00000015445	Avian	0	1443.04	0	0.383	1.02786	0.247538	0.130543					0.0237095	0.0408288	0.138282	0.396168	0.281205	0.427039	0.427039	0.7	22.0771	0.0105235	0.026982	0.0273815	0.0462171	0.0249611	0.0251749	0.0262849	0.0191523	0.0176156	0.0333194	0.0681531	0	1	0	1	0	0
20630	CPLX1	HGNC:2309	ENSG00000168993	ENSGALG00000015332	ENSACAG00000001829	ENSNSUG00000015448	Avian	0	1443.04	0		0.307891	-0.276081	0.219778			4	1	0.00107237	0.0213476	0.0314306		0.12911	0.251492	0.251492	0.4	2.37244	0.00401462	0.00512922	0.0058065	0.0140236	0.00863816	0.00187833	0.00346416	0.0231453	0.00645304	0.00441513	0.00224697	0	0	0	1	0	0
20631	PCGF3	HGNC:10066	ENSG00000185619	ENSGALG00000015333	ENSACAG00000000236	ENSNSUG00000015449	Avian	269.2	1443.04	0.186551	0.158	1.08104	0.211674	0.287229	16	1	9	1	0.00954965	0.0292144	0.0323887	0.335433	0.35915	0.730387	0.730387	7.8	5.57192	0.0203744	0.0280731	0.0343093	0.0285558	0.0292073	0.0214653	0.0325693	0.0304881	0.0293797	0.326782	0.0947185	0	0	0	0	0	0
20632	CHRNA8	CGNC:49660		ENSGALG00000015336	ENSACAG00000005448	ENSNSUG00000000130	Avian	0	1443.04	0										0.105121	0.0931565		0.114387				0.0168181								0.0239543				0	0	0	0	0	0
20633	KLF4	HGNC:6348	ENSG00000136826	ENSGALG00000026928	ENSACAG00000003706	ENSNSUG00000019701	Avian	0	1443.04	0	0.827	0.170874	0.183794	0.494882	23	1	21	1	0.0794954	0.072975		0.284058		0.572337	0.572337	90.5	7.87248	0.0175763	0.00920811	0.0124493	0.378736	0.0112821	0.00722226	0.0386367	0.007175	0.0115392	0.436805	0.040396	0	1	0	0	0	0
20634	RAD23B	HGNC:9813	ENSG00000119318	ENSGALG00000015540	ENSACAG00000003607	ENSNSUG00000019700	Avian	0	1443.04	0	0.612	0.239498	1.02975	0.37125	7	1	12	1	0.144381	0.163035	0.12731	0.406708	0.617427	0.568223	0.568223	11.5	110.596	0.0294837	0.0331598	0.0213412	0.0288966	0.0250805	0.0250542	0.0314409	0.0433293	0.0863785	0.267261	0.105815	0	0	0	0	0	0
20635	ZNF462	HGNC:21684	ENSG00000148143	ENSGALG00000015451	ENSACAG00000003537	ENSNSUG00000019699	Avian	302.34	1443.04	0.209516	0.361	0.408876	1.17616	0.33395	34	1	26	1	0.0791296	0.0586116		0.311572	0.450925	0.595295	0.595295	0.8	46.806	0.0520381	0.0352632	0.0329368	0.0267682	0.0312984	0.0318086	0.0339204	0.0693109	0.0402433	0.0892457	0.0356299	1	0	0	1	0	0
20636	TMEM38B	HGNC:25535	ENSG00000095209	ENSGALG00000027472	ENSACAG00000004542	ENSNSUG00000019697	Avian	0	1443.04	0	0.178	-0.3213	-0.9279	0.0671667					0.376875	0.333643	0.284584	0.204066		0.456323	0.456323	13.1	1.72483	0.0773271	0.0172066	0.0196933	0.0422273	0.0172967	0.0128965	0.0115166	0.0385882	0.0203793	0.213806	0.0965702	0	1	0	0	0	0
20637	TAL2	HGNC:11557	ENSG00000186051	ENSGALG00000023114	ENSACAG00000004545	ENSNSUG00000001814	Avian	0	1443.04	0	0.125	-0.427076	0.153397	0.0667949	2	1			0.271429	0.0686995	0.0721248		0.204643	0.25	0.25	0.1	0.230356	0.0461249	0.0148767	0.0237249	0.014543	0.0228269	0.0180745	0.0122002		0.456613		0.18574	0	0	0	0	0	0
20638	FKTN	HGNC:3622	ENSG00000106692	ENSGALG00000015443	ENSACAG00000004546	ENSNSUG00000019695	Avian	0	1443.04	0	0.079	0.312473	0.36039	0.002	2	1	3	1	0.122491	0.0995159	0.122371	0.363478	0.647054	0.341777	0.341777	3.1	13.6433	0.0239871	0.0210993	0.0347032	0.0301969	0.025338	0.0206312	0.0232746	0.00748685	0.010738	0.057464	0.0423512	0	0	0	0	0	0
20639	FSD1L	HGNC:13753	ENSG00000106701	ENSGALG00000015442	ENSACAG00000008495	ENSNSUG00000019693	Avian	0	1443.04	0	0.156			0.163714			1	1	0.0530603	0.31207	0.0727585	0.0992297	0.140257	0.647112	0.647112	1	4.34076	0.0633382	0.00917049	0.0101176	0.00347448	0.0124221	0.0102924	0.00721095	0.424164	0.24923	0.386332	0.093996	1	0	0	0	0	0
20640	SLC44A1	HGNC:18798	ENSG00000070214	ENSGALG00000015439	ENSACAG00000008390	ENSNSUG00000019692	Avian	0	1443.04	0	0.189	0.284553	-1.49421	0.179782	12	1	11	1	0.0747438	0.107329	0.118239	0.353639	0.376406	0.654655	0.654655	0.9	39.8584	0.00233415	0.00486681	0.0108208	0.032475	0.010608	0.00639937	0.0167005	0.0160979	0.02185	0.381881	0.140962	0	0	0	0	0	0
20641	ABCA1	HGNC:29	ENSG00000165029	ENSGALG00000015433	ENSACAG00000014282	ENSNSUG00000019088	Avian	0	1443.04	0	0.628	-0.466336	-0.30348	0.397216	13	1	14	1	0.0479018	0.0581725	0.118752	0.343924	0.252837	0.320429	0.320429	1.5	50.1248	0.0101478	0.00922577	0.0198331	0.149108	0.0164605	0.0504395	0.0128219	0.0231245	0.0457818	0.130558	0.298454	1	0	0	0	0	0
20642	NIPSNAP3A	HGNC:23619	ENSG00000165028	ENSGALG00000027334	ENSACAG00000028397	ENSNSUG00000019062	Avian	0	1443.04	0	0.077	-0.875511	0.156701	0.0752222					0.310359	0.160744	0.172774	0.190706				7	40.7717	0.0201228	0.0170122	0.0124042	0.00887748	0.0196037	0.0133793	0.0293999	0.0064275	0.0257702			0	0	0	0	0	0
20643	PSD3	HGNC:19093	ENSG00000156011	ENSGALG00000015428	ENSACAG00000014078	ENSNSUG00000019030	Avian	0	1443.04	0	0.527	-1.01684	-1.69208	0.175456	4	1	1			0.116414		0.146301	0.217576	0.252112	0.252112	1.4	2.20371	0.0303398	0.00494779	0.0271087	0.00697624	0.00901782	0.00250703	0.00792426	0.124237	0.096004	0.00581197	0.0391179	1	0	0	0	0	0
20644	LPL	HGNC:6677	ENSG00000175445	ENSGALG00000015425	ENSACAG00000013870	ENSNSUG00000019030	Avian	0	1443.04	0	0.281	-0.164753	-0.958563	0.081					0.0762878	0.111369	0.22484	0.101654	0.156613	0.707344	0.707344		12.3909	0.000448508	0.000863597	0.00109243	0.00888582	0.000952767	0.00328844	0.000625234	0.000443976	0.0227529	0.278308	0.377631	0	0	0	1	0	0
20645	NRG1	HGNC:7997	ENSG00000157168	ENSGALG00000015422	ENSACAG00000007554	ENSNSUG00000002094	Avian	0	1443.04	0	0.893	1.46759	1.01443	0.147972	23	1	17	1	0.29928	0.269978	0.131947	0.126092	0.162457	0.671609	0.671609	2.3	1.82424	0.055541	0.0133162	0.00129851	0.000578519	0.00118262	0.00253836	0.0098315	0.0111585	0.0182804	0.109854	0.00339662	0	1	0	1	0	0
20646	FUT10	HGNC:19234	ENSG00000172728	ENSGALG00000015399	ENSACAG00000006003	ENSNSUG00000002090	Avian	0	1443.04	0	0.054	0.316578	0.653902	0.047119			2	1	0.152049	0.183164	0.181352	0.213175	0.450693	0.627225	0.627225	3.7	2.68919	0.0534849	0.0201755	0.0416367	0.0328666	0.030228	0.0183284	0.0258727	0.024797	0.0808104	0.347234	0.200491	0	0	0	0	0	0
20647	FNTA	HGNC:3782	ENSG00000168522	ENSGALG00000015397	ENSACAG00000005961	ENSNSUG00000002087	Avian	0	1443.04	0	0.397	-0.18918	-2.53125	0.081			3	1	0.0807771	0.10914	0.087673	0.366742	0.247262	0.780164	0.780164	14.5	25.7396	0.0203491	0.0265037	0.0214204	0.0276327	0.0210108	0.02578	0.026221	0.11845	0.042512	0.320446	0.106329	0	0	0	0	0	0
20648	KCMF1	HGNC:20589	ENSG00000176407	ENSGALG00000015391	ENSACAG00000005906	ENSNSUG00000002085	Avian	564.04	1443.04	0.390869	0.115	0.310736	0.684869	0.212277	14	1	14	1	0.0519706	0.0942408	0.0143325	0.443694	0.365591	0.775994	0.775994	1.9	107.426	0.0426755	0.026718	0.0174303	0.0294707	0.0209997	0.0271308	0.0271075	0.257208	0.300545	0.278628	0.164951	0	0	0	0	0	0
20649	HOOK3	HGNC:23576	ENSG00000168172	ENSGALG00000015390	ENSACAG00000005732	ENSNSUG00000000672	Avian	0	1443.04	0	0.148	1.19276	-1.30044	0.202821	3	1	3	1	0.0200472	0.0202212	0.0608215	0.286432	0.227685	0.604356	0.604356	2.4	11.3744	0.0157575	0.0272314	0.0199266	0.0314434	0.0313731	0.0285792	0.0219261	0.251209	0.125872	0.339622	0.090652	0	0	0	0	0	0
20650	RNF170	HGNC:25358	ENSG00000120925	ENSGALG00000015386	ENSACAG00000005721	ENSNSUG00000000659	Avian	0	1443.04	0	0.149	0.313781	-1.05678	0.107929	1	1	1	1	0.0908552	0.0504484	0.112306	0.285236	0.470928	0.763983	0.763983	8.4	12.2978	0.0138198	0.0157623	0.023376	0.020536	0.016889	0.0132157	0.030062	0.00735008	0.00251882	0.327233	0.0811038	0	0	0	0	0	0
20651	THAP1	HGNC:20856	ENSG00000131931	ENSGALG00000015385	ENSACAG00000005705	ENSNSUG00000000648	Avian	0	1443.04	0	0.168	1.00523	-0.686589	0.137088	1	1	3	1	0.0293413	0.108964	0.0590797	0.229651	0.67817	0.678829	0.678829	36.8	10.0616	0.051413	0.0276	0.0296993	0.0295566	0.0290115	0.0306056	0.0166093	0.274325	0.0686359	0.2554	0.30413	0	0	0	1	0	0
20652	CHRNB3	HGNC:1963	ENSG00000147432	ENSGALG00000015384	ENSACAG00000005630	ENSNSUG00000000640	Avian	0	1443.04	0		-0.543975	-0.173057	0.009					0.0898042	0.112023	0.0693198			0.255505	0.255505		0.286563	0.0832791		0.00242908					0.0653181		0.0215441	0.0144596	0	0	0	0	0	0
20653	CHRNA6	HGNC:15963	ENSG00000147434	ENSGALG00000015382	ENSACAG00000005512	ENSNSUG00000000169	Avian	0	1443.04	0	0.05	-0.235481	-0.565282	0.0694					0.116519	0.0984975	0.151082		0.459448	0.257667	0.257667		0.0650811	0.0507476							0.013176	0.00584725		0.000990588	0	0	0	0	0	0
20654	IDUA	HGNC:5391	ENSG00000127415	ENSGALG00000015376	ENSACAG00000000308	ENSNSUG00000015456	Avian	0	1443.04	0	0.072	-1.60583	-1.19882	0.00175					0.105491	0.278513	0.146328		0.454292	0.52802	0.52802		8.1583	0.00888237	0.0301253	0.0369983	0.0253849	0.0281873	0.0149068	0.0253809	0.0351854	0.0352337	0.473467	0.0982002	0	0	0	0	0	0
20655	SLC26A1	HGNC:10993	ENSG00000145217	ENSGALG00000027423	ENSACAG00000000532	ENSNSUG00000015463	Avian	0	1443.04	0	0.129	0.0296457	-0.811801	0.0311			1	1	0.109922	0.173512				0.292224			0.00658609	0.00790697	0.0218865	0.0219937	0.00332201	0.0211363	0.0129384	0.0187101	0.0181678	0.000477487	0.107222		0	0	0	0	0	0
20656	RBP4	HGNC:9922	ENSG00000138207	ENSGALG00000015374	ENSACAG00000000576	ENSNSUG00000015586	Avian	111	1443.04	0.0769209	0.451	-0.0286434	0.870138	0.0303158					0.0999744	0.0349092	0.221423	0.0818019		0.254565	0.254565		0.133503	0.000467703	0.000464931	0.000105585	7.83615e-05	9.57772e-05	0.000369862	0.000332683	0.0118204	0.00437342	0.00512555	0.00208503	0	0	0	0	0	0
20657	PDE6B	HGNC:8786	ENSG00000133256	ENSGALG00000015373	ENSACAG00000000577	ENSNSUG00000015593	Avian	0	1443.04	0	0.529	-1.62508	-0.147567						0.0285132	0.0501459	0.146911	0.146537	0.132159			0.5	0.0170154	0.0191594	0.010321	0.0156671	0.00166876	0.00630135	0.00507378	0.006824	0.0842965	0.176664			0	0	0	0	0	0
20658	ATP5ME	HGNC:846	ENSG00000169020	ENSGALG00000015372	ENSACAG00000001268	ENSNSUG00000015597	Avian	0	1443.04	0	0.717	-1.86025	-0.559443						0.0831884			0.192888	0.423137			920.6	440.167	0.00830307	0.0189442	0.016111	0.0119485	0.014896	0.0212222	0.0218705	0.0145097	0.0109741		0.592688	0	0	0	0	0	0
20659	TMEM175	HGNC:28709	ENSG00000127419	ENSGALG00000015368	ENSACAG00000001342	ENSNSUG00000015597	Avian	0	1443.04	0	0.144	0.681304	-0.6849	0.059					0.113158	0.0974729	0.125313	0.139206	0.451724	0.415497	0.415497	3.2	14.5849	0.0191328	0.0238468	0.0176773	0.0247308	0.0195058	0.0155564	0.0173915	0.00407285	0.00850159	0.238703	0.0657491	0	0	0	0	0	0
20660	GAK	HGNC:4113	ENSG00000178950	ENSGALG00000015352	ENSACAG00000001376	ENSNSUG00000015599	Avian	0	1443.04	0	0.208	1.00921	-1.32269	0.163					0.114906	0.154327	0.12323	0.322448	0.605029	0.759024	0.759024	10.1	13.7283	0.0408516	0.0234088	0.0199626	0.033521	0.021872	0.0165913	0.0250473	0.0253509	0.0882206	0.171398	0.0925769	1	0	0	0	0	0
20661	PIGG	HGNC:25985	ENSG00000174227	ENSGALG00000015349	ENSACAG00000001731	ENSNSUG00000015600	Avian	0	1443.04	0	0.177	0.208572	-1.004	0.0201818	1		6	1	0.226385	0.134718	0.208043	0.0989467	0.413759	0.598497	0.598497	14.5	4.56338	0.0189406	0.0287246	0.0321919	0.0414324	0.0265554	0.0292355	0.0278245	0.0163705	0.0293841	0.417713	0.0704483	0	0	0	0	0	0
20662	TRABD2A	HGNC:27013	ENSG00000186854	ENSGALG00000026395	ENSACAG00000000547	ENSNSUG00000015602	Avian	0	1443.04	0		0.247961	0.668963	0.00365625						0.0773604		0.232258		0.278802	0.278802	0.1	0.57339	0.00774843	0.00466647	0.220153	0.0851883	0.0034126	0.00356051	0.00354429	0.356833		0.896695	0.00581176	0	0	0	0	0	0
20663	SLC49A3	HGNC:26177	ENSG00000169026	ENSGALG00000020538	ENSACAG00000000245	ENSNSUG00000015450	Avian	0	1443.04	0	0.041	-1.90327	-2.1538						0.219189	0.136202	0.293446	0.0625	0.289205	0.715352	0.715352	0.2	5.18725	0.0645859	0.0244871	0.00676584	0.0222373	0.0174724	0.0137507	0.0365666	0.0201068	0.0103636	0.349478	0.191408	0	0	0	1	0	0
20664	GRIN3A	HGNC:16767	ENSG00000198785	ENSGALG00000015551	ENSACAG00000011011	ENSNSUG00000011046	Avian	0	1443.04	0	0.352	0.111713	-0.320609	0.0719545					0.0782816	0.0524551	0.0982811		0.16351	0.253466	0.253466		3.81122	0.0215154	0.0158237	0.0123393	0.00982056	0.00688833	0.00962556	0.0125856	0.0041569	0.0076416	0.00339652	0.0799034	0	0	0	0	0	0
20665	RNF20	HGNC:10062	ENSG00000155827	ENSGALG00000015548	ENSACAG00000014960	ENSNSUG00000010246	Avian	0	1443.04	0	0.125	-0.2499	0.379744	0.0768372					0.0180079	0.0238396		0.555575	0.263616	0.715085	0.715085	22	70.8957	0.0378945	0.0267151	0.0254687	0.0256647	0.026843	0.0303372	0.0311314	0.18967	0.110256	0.15088	0.0645199	1	1	0	0	0	0
20666	PGAP4	HGNC:28180	ENSG00000165152	ENSGALG00000015545	ENSACAG00000017458	ENSNSUG00000010234	Avian	0	1443.04	0		-0.825661	-0.538597	0.113382					0.0117904	0.16525	0.212742	0.0625	0.190756	0.559636	0.559636	0.4	6.59269	0.00590175	0.0134355	0.0260133	0.0263746	0.018008	0.0116806	0.0330407	0.01858	0.0102874	0.446719	0.125249	0	0	0	0	0	0
20667	ALDOB	HGNC:417	ENSG00000136872	ENSGALG00000015544	ENSACAG00000017436	ENSNSUG00000010234	Avian	0	1443.04	0	0.194	-2.45033	-0.0605214	0.011					0.0563051	0.0867998	0.0477707	0.107475	0.142173	0.288776	0.288776		5.04802	2.71029e-05	7.86e-05	2.34894e-05	5.78112e-05	3.30875e-05	6.20085e-05	3.05118e-05	0.00889974	0.00666758	0.0722744	0.00386809	0	1	0	0	0	0
20668	MRPL50	HGNC:16654	ENSG00000136897	ENSGALG00000015543	ENSACAG00000017435	ENSNSUG00000010232	Avian	0	1443.04	0	0.164	0.337205	0.0892217	0.025037					0.260601	0.140881	0.308064	0.0625	0.628445			247.6	104.743	0.0194269	0.021638	0.0276901	0.0215136	0.0223073	0.0182452	0.0195893	0.0451098	0.0482427		0.218997	0	0	0	1	0	0
20669	PLPPR1	HGNC:25993	ENSG00000148123	ENSGALG00000015542	ENSACAG00000017418	ENSNSUG00000010229	Avian	0	1443.04	0		0.35709	0.393974						0.0465789	0.113488	0.0515333	0.12536	0.173556				5.7536								0.0048252	0.0100044			0	0	0	0	0	0
20670	PALM2	HGNC:15845	ENSG00000243444	ENSGALG00000015655	ENSACAG00000017414	ENSNSUG00000006868	Avian	111	1443.04	0.0769209		0.685317	0.570806	0.232164	21	1	19	1	0.0888594	0.196444			0.132234	0.284258	0.284258		0.177016	0.0116943	0.00597137	0.00605158	0.00910169	0.0611537	0.00487981	0.00526264	0.258663	0.0236908	0.0443148	0.104875	0	0	0	0	0	0
20671	AKAP2	HGNC:372	ENSG00000157654	ENSGALG00000015656	ENSACAG00000017412	ENSNSUG00000007938	Avian	0	1443.04	0		-0.502821	-1.41696	0.178667	5	1	4	1	0.214193	0.382512	0.234418		0.469734				33.3711	0.00338422	0.0239832	0.0117035	0.0782769	0.0481418	0.0294944	0.00946202	0.0190897	0.0102588		0.467245	0	0	0	0	0	0
20672	SLC46A2	HGNC:16055	ENSG00000119457	ENSGALG00000027345	ENSACAG00000017402	ENSNSUG00000007927	Avian	0	1443.04	0	0.11	0.461959	0.080787	0.0318571					0.200779	0.22363	0.191631	0.0905022		0.332334	0.332334		16.4106	0.0154841	0.00468178	0.00185713	0.0034742	0.00315123	0.00405477	0.0194181	0.00295455	0.00390241	0.00320846	0.0336551	0	0	0	0	0	0
20673	SNX30	HGNC:23685	ENSG00000148158	ENSGALG00000015660	ENSACAG00000017384	ENSNSUG00000007534	Avian	0	1443.04	0	0.119	0.89189	-2.53125	0.194278	1	1			0.0572391	0.0442308	0.063747	0.126065	0.43306	0.777144	0.777144	1.6	36.3379	0.0394011	0.00813035	0.0188558	0.0258409	0.0188182	0.0112316	0.0139516	0.0645487	0.436287	0.19635	0.06709	0	0	0	0	0	0
20674	INIP	HGNC:24994	ENSG00000148153	ENSGALG00000020528	ENSACAG00000017374	ENSNSUG00000007926	Avian	0	1443.04	0		0.336196	-2.53125	0.0860811					0.0414229	0.0391837	0.0339364	0.418829	0.531628	0.550932	0.550932	28.6	109.737	0.0152246	0.0190168	0.0177452	0.0183416	0.0195758	0.0136421	0.0216373	0.0415013	0.149598	0.143716	0.211316	0	0	0	0	0	0
20675	KIAA1958	HGNC:23427	ENSG00000165185	ENSGALG00000023083	ENSACAG00000017372	ENSNSUG00000007922	Avian	0	1443.04	0	0.183	0.28089	-2.53125	0.121161	7	1	4	1	0.384824	0.192998	0.220017	0.0625	0.2321	0.260619	0.260619	0.9	1.25358	0.0501358	0.0155057	0.0511511	0.0195616	0.0213545	0.00936088	0.014992	0.0112184	0.011373	0.0407461	0.127503	0	0	0	0	0	0
20676	HSDL2	HGNC:18572	ENSG00000119471	ENSGALG00000015663	ENSACAG00000017353	ENSNSUG00000007921	Avian	0	1443.04	0	0.277	0.831802	0.37098	0.00823913					0.159681	0.199269	0.0617708	0.331125	0.49843	0.34127	0.34127	1.7	73.9725	0.0151684	0.0128407	0.0240678	0.0198542	0.0137759	0.0172789	0.013152	0.0304943	0.0445274	0.732559	0.196228	0	0	0	1	0	0
20677	PTBP3	HGNC:10253	ENSG00000119314	ENSGALG00000015669	ENSACAG00000017316	ENSNSUG00000007920	Avian	0	1443.04	0		0.938918	1.17917	0.155725	16	1	15	1	0.0983425	0.515991	0.114665	0.167377	0.138919	0.546938	0.546938	4.5	15.0728	0.0417044	0.0171013	0.0174806	0.0302864	0.0180695	0.013241	0.0546555	0.228801	0.254	0.45709	0.0682646	0	0	0	0	0	0
20678	SUSD1	HGNC:25413	ENSG00000106868	ENSGALG00000015677	ENSACAG00000022560	ENSNSUG00000007918	Avian	0	1443.04	0	0.071	-0.987151	0.928209	0.0641					0.341419	0.380573	0.286726	0.199617	0.462822	0.25907	0.25907	1.6	3.84423	0.022282	0.0150749	0.00924222	0.0155178	0.0186158	0.00898157	0.0169003	0.045006	0.0520275	0.964989	0.0277812	0	0	0	0	0	0
20679	UGCG	HGNC:12524	ENSG00000148154	ENSGALG00000015682	ENSACAG00000017299	ENSNSUG00000007916	Avian	0	1443.04	0	0.149	0.74908	0.630368	0.236182	21	1	18	1	0.0234133	0.0152043	0.0424192	0.248581	0.546441	0.551863	0.551863	12.8	13.2461	0.0103101	0.0137867	0.0140262	0.0280933	0.0131	0.0272482	0.0437872	0.0206118	0.00919533	0.453011	0.0602978	0	0	0	0	0	0
20680	SHOC1	HGNC:26535	ENSG00000165181	ENSGALG00000027341	ENSACAG00000012617	ENSNSUG00000019062	Avian	0	1443.04	0	0.132	-0.0461169	0.25338	0.00583333					0.47			0.063814		0.55617			0.0242669	0.673409	0.0125423	0.0272262	0.0221867	0.0251446	0.0127686	0.0403764			0.391716		0	1	0	0	0	0
20681	GNG10	HGNC:4402	ENSG00000242616	ENSGALG00000015683	ENSACAG00000012656	ENSNSUG00000007912	Avian	0	1443.04	0	0.191			0.127714					0.0455316	0.0591289	0.0744549	0.398808	0.255915			38.7	59.1326	0.00766839	0.0337748	0.0179702	0.0368994	0.0241883	0.0253896	0.017685	0.162012	0.213989		0.171588	0	0	0	0	0	0
20682	DNAJC25	HGNC:34187	ENSG00000059769	ENSGALG00000015684	ENSACAG00000012657	ENSNSUG00000007911	Avian	0	1443.04	0		0.597929	0.874491	0.0898571						0.101781	0.105185	0.220822	0.497664	0.557484	0.557484	11.4	33.6617	0.0286586	0.0286443	0.0217528	0.0227375	0.022282	0.0211869	0.0200311	0.0608167	0.114809	0.120796	0.256189	0	0	0	0	0	0
[truncated: 1,247 more rows]
