# Supplementary material for: Dosage-sensitive functions in embryonic development drove the survival of genes on sex-specific chromosomes in snakes, birds, and mammals
Source: HighWire-hosted journal article supplement (doi:10.1101/gr.268516.120), 2021-01-21
Supplement: Supplemental_Table_S8.xlsx [file Supplemental_Table_S8.xlsx]

## Sheet: Sheet1
Supplemental Table S8. GO terms enriched in survivors in caenophidian snakes.
GO biological process complete	Non-survivors (1094)	Survivors (103)	Expected	over/under represented	Fold-Enrichment	P value	FDR
histone H4 acetylation (GO:0043967)	2	5	0.19	+	26.55	7.86e-05	0.0103
anaphase-promoting complex-dependent catabolic process (GO:0031145)	3	7	0.28	+	24.78	2.78e-06	0.000848
mitotic S phase (GO:0000084)	2	4	0.19	+	21.24	0.000679	0.0467
chromatin silencing (GO:0006342)	2	4	0.19	+	21.24	0.000679	0.0458
negative regulation of G0 to G1 transition (GO:0070317)	2	4	0.19	+	21.24	0.000679	0.045
regulation of transcription elongation from RNA polymerase II promoter (GO:0034243)	2	4	0.19	+	21.24	0.000679	0.0447
SCF-dependent proteasomal ubiquitin-dependent protein catabolic process (GO:0031146)	4	6	0.38	+	15.93	5.57e-05	0.00834
regulation of cellular amino acid metabolic process (GO:0006521)	5	5	0.47	+	10.62	0.000763	0.0497
regulation of transcription from RNA polymerase II promoter in response to hypoxia (GO:0061418)	5	5	0.47	+	10.62	0.000763	0.0493
mitotic anaphase (GO:0000090)	7	7	0.66	+	10.62	5.94e-05	0.00855
protein polyubiquitination (GO:0000209)	15	14	1.41	+	9.91	1.35e-08	3.44e-05
antigen processing and presentation of exogenous peptide antigen (GO:0002478)	7	6	0.66	+	9.1	0.000367	0.0314
positive regulation of protein modification by small protein conjugation or removal (GO:1903322)	7	6	0.66	+	9.1	0.000367	0.0311
positive regulation of intracellular transport (GO:0032388)	7	6	0.66	+	9.1	0.000367	0.0304
non-canonical Wnt signaling pathway (GO:0035567)	8	6	0.75	+	7.97	0.000598	0.0447
cellular response to tumor necrosis factor (GO:0071356)	12	8	1.13	+	7.08	0.000121	0.0142
post-translational protein modification (GO:0043687)	17	10	1.6	+	6.25	3.53e-05	0.00599
protein catabolic process (GO:0030163)	29	15	2.73	+	5.49	1.09e-06	0.000463
regulation of mitotic cell cycle (GO:0007346)	47	15	4.43	+	3.39	0.000118	0.014
regulation of cellular catabolic process (GO:0031329)	51	15	4.8	+	3.12	0.000252	0.0235
hemopoiesis (GO:0030097)	49	14	4.61	+	3.03	0.000532	0.0414
leukocyte activation (GO:0045321)	63	16	5.93	+	2.7	0.000636	0.0453
positive regulation of transcription, DNA-templated (GO:0045893)	108	24	10.17	+	2.36	0.000191	0.0189
interspecies interaction between organisms (GO:0044419)	105	22	9.89	+	2.23	0.000671	0.0469
GO molecular function complete	Non-survivors (1094)	Survivors (103)	Expected	over/under represented	Fold-Enrichment	P value	FDR
chromatin binding (GO:0003682)	39	17	3.67	+	4.63	1.27e-06	0.00205
enzyme binding (GO:0019899)	133	30	12.52	+	2.4	1.42e-05	0.0115
GO cellular component complete	Non-survivors (1094)	Survivors (103)	Expected	over/under represented	Fold-Enrichment	P value	FDR
nuclear ubiquitin ligase complex (GO:0000152)	1	4	0.09	+	42.49	0.000242	0.0128
ficolin-1-rich granule lumen (GO:1904813)	7	7	0.66	+	10.62	5.94e-05	0.00417
cullin-RING ubiquitin ligase complex (GO:0031461)	8	6	0.75	+	7.97	0.000598	0.03
nuclear speck (GO:0016607)	25	11	2.35	+	4.67	0.000109	0.00639
