# Supplementary material for: Dosage-sensitive functions in embryonic development drove the survival of genes on sex-specific chromosomes in snakes, birds, and mammals
Source: HighWire-hosted journal article supplement (doi:10.1101/gr.268516.120), 2021-01-21
Supplement: Supplemental_Table_S9.xlsx [file Supplemental_Table_S9.xlsx]

## Sheet: Sheet1
Supplemental Table S9. List of survivors by species and stratum
Gene	Symbol	Species	Stratum
10337	RPS4X	Homo sapiens	Therian S1
10534	RBMX	Homo sapiens	Therian S1
10542	SOX3	Homo sapiens	Therian S1
10552	HSFX1	Homo sapiens	Therian S1
10337	RPS4X	Pan troglodytes	Therian S1
10534	RBMX	Pan troglodytes	Therian S1
10542	SOX3	Pan troglodytes	Therian S1
10337	RPS4X	Gorilla gorilla	Therian S1
10534	RBMX	Gorilla gorilla	Therian S1
10542	SOX3	Gorilla gorilla	Therian S1
10552	HSFX1	Gorilla gorilla	Therian S1
10337	RPS4X	Macaca mulatta	Therian S1
10534	RBMX	Macaca mulatta	Therian S1
10542	SOX3	Macaca mulatta	Therian S1
10552	HSFX1	Macaca mulatta	Therian S1
10337	RPS4X	Callithrix jacchus	Therian S1
10534	RBMX	Callithrix jacchus	Therian S1
10542	SOX3	Callithrix jacchus	Therian S1
10534	RBMX	Mus musculus	Therian S1
10542	SOX3	Mus musculus	Therian S1
10534	RBMX	Rattus norvegicus	Therian S1
10542	SOX3	Rattus norvegicus	Therian S1
10483	CUL4B	Canis lupus	Therian S1
10534	RBMX	Canis lupus	Therian S1
10542	SOX3	Canis lupus	Therian S1
10552	HSFX1	Canis lupus	Therian S1
10337	RPS4X	Felis catus	Therian S1
10483	CUL4B	Felis catus	Therian S1
10542	SOX3	Felis catus	Therian S1
10552	HSFX1	Felis catus	Therian S1
10483	CUL4B	Equus caballus	Therian S1
10534	RBMX	Equus caballus	Therian S1
10542	SOX3	Equus caballus	Therian S1
10552	HSFX1	Equus caballus	Therian S1
10534	RBMX	Bos taurus	Therian S1
10542	SOX3	Bos taurus	Therian S1
10552	HSFX1	Bos taurus	Therian S1
10483	CUL4B	Sus scrofa	Therian S1
10534	RBMX	Sus scrofa	Therian S1
10542	SOX3	Sus scrofa	Therian S1
10552	HSFX1	Sus scrofa	Therian S1
10354	ATRX	Monodelphis domestica	Therian S1
10487	THOC2	Monodelphis domestica	Therian S1
10517	PHF6	Monodelphis domestica	Therian S1
10519	PABIR2	Monodelphis domestica	Therian S1
10534	RBMX	Monodelphis domestica	Therian S1
10542	SOX3	Monodelphis domestica	Therian S1
10552	HSFX1	Monodelphis domestica	Therian S1
10354	ATRX	Macropus eugenii	Therian S1
10487	THOC2	Macropus eugenii	Therian S1
10517	PHF6	Macropus eugenii	Therian S1
10519	PABIR2	Macropus eugenii	Therian S1
10534	RBMX	Macropus eugenii	Therian S1
10542	SOX3	Macropus eugenii	Therian S1
10552	HSFX1	Macropus eugenii	Therian S1
10178	RBM10	Monodelphis domestica	Metatherian S2
10179	UBA1	Monodelphis domestica	Metatherian S2
10218	OTUD5	Monodelphis domestica	Metatherian S2
10221	TFE3	Monodelphis domestica	Metatherian S2
10253	KDM5C	Monodelphis domestica	Metatherian S2
10258	HUWE1	Monodelphis domestica	Metatherian S2
10558	HMGB3	Monodelphis domestica	Metatherian S2
10595	HCFC1	Monodelphis domestica	Metatherian S2
10598	MECP2	Monodelphis domestica	Metatherian S2
10604	RPL10	Monodelphis domestica	Metatherian S2
10178	RBM10	Macropus eugenii	Metatherian S2
10179	UBA1	Macropus eugenii	Metatherian S2
10253	KDM5C	Macropus eugenii	Metatherian S2
10258	HUWE1	Macropus eugenii	Metatherian S2
10558	HMGB3	Macropus eugenii	Metatherian S2
10595	HCFC1	Macropus eugenii	Metatherian S2
10598	MECP2	Macropus eugenii	Metatherian S2
10604	RPL10	Macropus eugenii	Metatherian S2
10041	AMELX	Homo sapiens	Eutherian S2/S3
10047	TMSB4X	Homo sapiens	Eutherian S2/S3
10074	TXLNG	Homo sapiens	Eutherian S2/S3
10092	EIF1AX	Homo sapiens	Eutherian S2/S3
10110	ZFX	Homo sapiens	Eutherian S2/S3
10157	USP9X	Homo sapiens	Eutherian S2/S3
10158	DDX3X	Homo sapiens	Eutherian S2/S3
10169	KDM6A	Homo sapiens	Eutherian S2/S3
10252	TSPYL2	Homo sapiens	Eutherian S2/S3
10253	KDM5C	Homo sapiens	Eutherian S2/S3
10041	AMELX	Pan troglodytes	Eutherian S2/S3
10092	EIF1AX	Pan troglodytes	Eutherian S2/S3
10110	ZFX	Pan troglodytes	Eutherian S2/S3
10158	DDX3X	Pan troglodytes	Eutherian S2/S3
10169	KDM6A	Pan troglodytes	Eutherian S2/S3
10252	TSPYL2	Pan troglodytes	Eutherian S2/S3
10253	KDM5C	Pan troglodytes	Eutherian S2/S3
10041	AMELX	Gorilla gorilla	Eutherian S2/S3
10047	TMSB4X	Gorilla gorilla	Eutherian S2/S3
10074	TXLNG	Gorilla gorilla	Eutherian S2/S3
10092	EIF1AX	Gorilla gorilla	Eutherian S2/S3
10110	ZFX	Gorilla gorilla	Eutherian S2/S3
10157	USP9X	Gorilla gorilla	Eutherian S2/S3
10158	DDX3X	Gorilla gorilla	Eutherian S2/S3
10169	KDM6A	Gorilla gorilla	Eutherian S2/S3
10252	TSPYL2	Gorilla gorilla	Eutherian S2/S3
10253	KDM5C	Gorilla gorilla	Eutherian S2/S3
10041	AMELX	Macaca mulatta	Eutherian S2/S3
10047	TMSB4X	Macaca mulatta	Eutherian S2/S3
10074	TXLNG	Macaca mulatta	Eutherian S2/S3
10092	EIF1AX	Macaca mulatta	Eutherian S2/S3
10110	ZFX	Macaca mulatta	Eutherian S2/S3
10157	USP9X	Macaca mulatta	Eutherian S2/S3
10158	DDX3X	Macaca mulatta	Eutherian S2/S3
10169	KDM6A	Macaca mulatta	Eutherian S2/S3
10252	TSPYL2	Macaca mulatta	Eutherian S2/S3
10253	KDM5C	Macaca mulatta	Eutherian S2/S3
10092	EIF1AX	Callithrix jacchus	Eutherian S2/S3
10110	ZFX	Callithrix jacchus	Eutherian S2/S3
10158	DDX3X	Callithrix jacchus	Eutherian S2/S3
10169	KDM6A	Callithrix jacchus	Eutherian S2/S3
10252	TSPYL2	Callithrix jacchus	Eutherian S2/S3
10253	KDM5C	Callithrix jacchus	Eutherian S2/S3
10109	EIF2S3	Mus musculus	Eutherian S2/S3
10110	ZFX	Mus musculus	Eutherian S2/S3
10157	USP9X	Mus musculus	Eutherian S2/S3
10158	DDX3X	Mus musculus	Eutherian S2/S3
10169	KDM6A	Mus musculus	Eutherian S2/S3
10179	UBA1	Mus musculus	Eutherian S2/S3
10253	KDM5C	Mus musculus	Eutherian S2/S3
10109	EIF2S3	Rattus norvegicus	Eutherian S2/S3
10110	ZFX	Rattus norvegicus	Eutherian S2/S3
10157	USP9X	Rattus norvegicus	Eutherian S2/S3
10158	DDX3X	Rattus norvegicus	Eutherian S2/S3
10169	KDM6A	Rattus norvegicus	Eutherian S2/S3
10179	UBA1	Rattus norvegicus	Eutherian S2/S3
10252	TSPYL2	Rattus norvegicus	Eutherian S2/S3
10253	KDM5C	Rattus norvegicus	Eutherian S2/S3
10074	TXLNG	Canis lupus	Eutherian S2/S3
10092	EIF1AX	Canis lupus	Eutherian S2/S3
10109	EIF2S3	Canis lupus	Eutherian S2/S3
10110	ZFX	Canis lupus	Eutherian S2/S3
10152	BCOR	Canis lupus	Eutherian S2/S3
10157	USP9X	Canis lupus	Eutherian S2/S3
10158	DDX3X	Canis lupus	Eutherian S2/S3
10169	KDM6A	Canis lupus	Eutherian S2/S3
10179	UBA1	Canis lupus	Eutherian S2/S3
10252	TSPYL2	Canis lupus	Eutherian S2/S3
10253	KDM5C	Canis lupus	Eutherian S2/S3
10041	AMELX	Felis catus	Eutherian S2/S3
10074	TXLNG	Felis catus	Eutherian S2/S3
10092	EIF1AX	Felis catus	Eutherian S2/S3
10109	EIF2S3	Felis catus	Eutherian S2/S3
10110	ZFX	Felis catus	Eutherian S2/S3
10157	USP9X	Felis catus	Eutherian S2/S3
10158	DDX3X	Felis catus	Eutherian S2/S3
10169	KDM6A	Felis catus	Eutherian S2/S3
10179	UBA1	Felis catus	Eutherian S2/S3
10252	TSPYL2	Felis catus	Eutherian S2/S3
10253	KDM5C	Felis catus	Eutherian S2/S3
10041	AMELX	Equus caballus	Eutherian S2/S3
10047	TMSB4X	Equus caballus	Eutherian S2/S3
10067	ZRSR2	Equus caballus	Eutherian S2/S3
10068	AP1S2	Equus caballus	Eutherian S2/S3
10074	TXLNG	Equus caballus	Eutherian S2/S3
10092	EIF1AX	Equus caballus	Eutherian S2/S3
10109	EIF2S3	Equus caballus	Eutherian S2/S3
10110	ZFX	Equus caballus	Eutherian S2/S3
10128	TAB3	Equus caballus	Eutherian S2/S3
10152	BCOR	Equus caballus	Eutherian S2/S3
10157	USP9X	Equus caballus	Eutherian S2/S3
10158	DDX3X	Equus caballus	Eutherian S2/S3
10169	KDM6A	Equus caballus	Eutherian S2/S3
10179	UBA1	Equus caballus	Eutherian S2/S3
10229	SYP	Equus caballus	Eutherian S2/S3
10252	TSPYL2	Equus caballus	Eutherian S2/S3
10253	KDM5C	Equus caballus	Eutherian S2/S3
10041	AMELX	Bos taurus	Eutherian S2/S3
10052	OFD1	Bos taurus	Eutherian S2/S3
10067	ZRSR2	Bos taurus	Eutherian S2/S3
10092	EIF1AX	Bos taurus	Eutherian S2/S3
10109	EIF2S3	Bos taurus	Eutherian S2/S3
10110	ZFX	Bos taurus	Eutherian S2/S3
10157	USP9X	Bos taurus	Eutherian S2/S3
10158	DDX3X	Bos taurus	Eutherian S2/S3
10169	KDM6A	Bos taurus	Eutherian S2/S3
10252	TSPYL2	Bos taurus	Eutherian S2/S3
10041	AMELX	Sus scrofa	Eutherian S2/S3
10047	TMSB4X	Sus scrofa	Eutherian S2/S3
10074	TXLNG	Sus scrofa	Eutherian S2/S3
10092	EIF1AX	Sus scrofa	Eutherian S2/S3
10109	EIF2S3	Sus scrofa	Eutherian S2/S3
10110	ZFX	Sus scrofa	Eutherian S2/S3
10157	USP9X	Sus scrofa	Eutherian S2/S3
10158	DDX3X	Sus scrofa	Eutherian S2/S3
10169	KDM6A	Sus scrofa	Eutherian S2/S3
10179	UBA1	Sus scrofa	Eutherian S2/S3
10252	TSPYL2	Sus scrofa	Eutherian S2/S3
10024	NLGN4X	Equus caballus	Horse S4
10026	STS	Equus caballus	Horse S4
10028	ANOS1	Equus caballus	Horse S4
10030	TBL1X	Equus caballus	Horse S4
10032	SHROOM2	Equus caballus	Horse S4
10036	WWC3	Equus caballus	Horse S4
10035	Samt4	Felis catus	Carnivore S4
10035	Samt4	Canis lupus	Carnivore S4
10035	NLGN4X	Callithrix jacchus	Simian S4
10035	NLGN4X	Macaca mulatta	Simian S4
10030	TBL1X	Macaca mulatta	Simian S4
10035	NLGN4X	Gorilla gorilla	Simian S4
10030	TBL1X	Gorilla gorilla	Simian S4
10035	NLGN4X	Pan troglodytes	Simian S4
10035	NLGN4X	Homo sapiens	Simian S4
10030	TBL1X	Homo sapiens	Simian S4
10010	P2RY8	Callithrix jacchus	Marmoset S5
10011	AKAP17A	Callithrix jacchus	Marmoset S5
10014	ZBED1	Callithrix jacchus	Marmoset S5
10022	MXRA5	Macaca mulatta	Catarrhine S4
10023	PRKX	Macaca mulatta	Catarrhine S4
10023	PRKX	Gorilla gorilla	Catarrhine S4
10023	PRKX	Pan troglodytes	Catarrhine S4
10023	PRKX	Homo sapiens	Catarrhine S4
10052	OFD1	Equus caballus	Horse OFD1 X transposed region
10052	OFD1	Sus scrofa	Pig OFD1 X transposed region
10052	OFD1	Canis lupus	Dog OFD1 X transposed region
10156	MED14	Rattus norvegicus	Rat MED14 X transposed region
10388	PCDH11X	Homo sapiens	Human PCDH11X X-transposed region
10487	THOC2	Callithrix jacchus	Marmoset THOC2 X-transposed region
20631	PCGF3	Struthio camelus	Avian Stratum 0
20514	SMC5	Struthio camelus	Ostrich Stratum 1
20511	CEMIP2	Struthio camelus	Ostrich Stratum 1
20512	TRPM3	Struthio camelus	Ostrich Stratum 1
20507	ZFAND5	Struthio camelus	Ostrich Stratum 1
20503	RORB	Struthio camelus	Ostrich Stratum 1
20500	CARNMT1	Struthio camelus	Ostrich Stratum 1
20498	OSTF1	Struthio camelus	Ostrich Stratum 1
20485	RASEF	Struthio camelus	Ostrich Stratum 1
20477	RMI1	Struthio camelus	Ostrich Stratum 1
20468	DAPK1	Struthio camelus	Ostrich Stratum 1
20469	GAS1	Struthio camelus	Ostrich Stratum 1
20470	TUT7	Struthio camelus	Ostrich Stratum 1
20471	ISCA1	Struthio camelus	Ostrich Stratum 1
20472	GOLM1	Struthio camelus	Ostrich Stratum 1
20461	ERCC6L2	Struthio camelus	Ostrich Stratum 1
20458	ZNF367	Struthio camelus	Ostrich Stratum 1
20670	PALM2	Dromaius novaehollandiae	Avian Stratum 0
20656	RBP4	Dromaius novaehollandiae	Avian Stratum 0
20482	UBQLN1	Tinamus guttatus	Tinamide Stratum 1
20439	ROR2	Tinamus guttatus	Tinamide Stratum 1
20440	NFIL3	Tinamus guttatus	Tinamide Stratum 1
20409	LOX	Tinamus guttatus	Tinamide Stratum 1
20393	FEM1C	Tinamus guttatus	Tinamide Stratum 1
20371	EFNA5	Tinamus guttatus	Tinamus Stratum 2
20369	MACIR	Tinamus guttatus	Tinamus Stratum 2
20361	RGMB	Tinamus guttatus	Tinamus Stratum 2
20342	ARRDC3	Tinamus guttatus	Tinamus Stratum 2
20336	MEF2C	Tinamus guttatus	Tinamus Stratum 2
20335	TMEM161B	Tinamus guttatus	Tinamus Stratum 2
20330	HAPLN1	Tinamus guttatus	Tinamus Stratum 2
20325	RPS23	Tinamus guttatus	Tinamus Stratum 2
20321	ZCCHC9	Tinamus guttatus	Tinamus Stratum 2
20306	SERF1A	Tinamus guttatus	Tinamus Stratum 2
20301	MRPS27	Tinamus guttatus	Tinamus Stratum 2
20297	FCHO2	Tinamus guttatus	Tinamus Stratum 2
20298	TNPO1	Tinamus guttatus	Tinamus Stratum 2
20295	TMEM174	Tinamus guttatus	Tinamus Stratum 2
20285	FAM169A	Tinamus guttatus	Tinamus Stratum 2
20280	CERT1	Tinamus guttatus	Tinamus Stratum 2
20267	WDR41	Tinamus guttatus	Tinamus Stratum 2
20263	SCAMP1	Tinamus guttatus	Tinamus Stratum 2
20257	HOMER1	Tinamus guttatus	Tinamus Stratum 2
20258	JMY	Tinamus guttatus	Tinamus Stratum 2
20254	MTX3	Tinamus guttatus	Tinamus Stratum 2
20243	ERBIN	Tinamus guttatus	Tinamus Stratum 2
20244	SREK1	Tinamus guttatus	Tinamus Stratum 2
20240	TRAPPC13	Tinamus guttatus	Tinamus Stratum 2
20241	SGTB	Tinamus guttatus	Tinamus Stratum 2
20236	CENPK	Tinamus guttatus	Tinamus Stratum 2
20218	PLK2	Tinamus guttatus	Tinamus Stratum 2
20216	MIER3	Tinamus guttatus	Tinamus Stratum 2
20212	IL6ST	Tinamus guttatus	Tinamus Stratum 2
20200	ESM1	Tinamus guttatus	Tinamus Stratum 2
20196	ARL15	Tinamus guttatus	Tinamus Stratum 2
20193	MOCS2	Tinamus guttatus	Tinamus Stratum 2
20194	FST	Tinamus guttatus	Tinamus Stratum 2
20179	HMGCS1	Tinamus guttatus	Tinamus Stratum 2
20166	PRKAA1	Tinamus guttatus	Tinamus Stratum 2
20167	RPL37	Tinamus guttatus	Tinamus Stratum 2
20164	PTGER4	Tinamus guttatus	Tinamus Stratum 2
20157	EGFLAM	Tinamus guttatus	Tinamus Stratum 2
20158	LIFR	Tinamus guttatus	Tinamus Stratum 2
20153	CPLANE1	Tinamus guttatus	Tinamus Stratum 2
20149	NADK2	Tinamus guttatus	Tinamus Stratum 2
20150	RANBP3L	Tinamus guttatus	Tinamus Stratum 2
20151	SLC1A3	Tinamus guttatus	Tinamus Stratum 2
20136	C1QTNF3	Tinamus guttatus	Tinamus Stratum 2
20137	RAI14	Tinamus guttatus	Tinamus Stratum 2
20126	GOLPH3	Tinamus guttatus	Tinamus Stratum 2
20115	LOC769899	Tinamus guttatus	Tinamus Stratum 2
20099	FAM214B	Tinamus guttatus	Tinamus Stratum 2
20085	DCTN3	Tinamus guttatus	Tinamus Stratum 2
20086	ARID3C	Tinamus guttatus	Tinamus Stratum 2
20075	UBAP1	Tinamus guttatus	Tinamus Stratum 2
20068	AQP3	Tinamus guttatus	Tinamus Stratum 2
20069	NOL6	Tinamus guttatus	Tinamus Stratum 2
20060	SETBP1	Tinamus guttatus	Tinamus Stratum 2
20052	RNF165	Tinamus guttatus	Tinamus Stratum 2
20049	PIAS2	Tinamus guttatus	Tinamus Stratum 2
20041	SMAD7	Tinamus guttatus	Tinamus Stratum 2
20648	KCMF1	Anas platyrhynchos	Avian Stratum 0
20478	HNRNPK	Anas platyrhynchos	Neognathae Stratum 1
20452	SPIN1	Anas platyrhynchos	Neognathae Stratum 1
20362	CHD1	Anas platyrhynchos	Neognathae Stratum 1
20333	RASA1	Anas platyrhynchos	Neognathae Stratum 1
20302	MAP1B	Anas platyrhynchos	Duck Stratum 2
20226	ZSWIM6	Anas platyrhynchos	Duck Stratum 2
20196	ARL15	Anas platyrhynchos	Duck Stratum 2
20177	ZNF131	Anas platyrhynchos	Duck Stratum 2
20152	NIPBL	Anas platyrhynchos	Duck Stratum 2
20128	ZFR	Anas platyrhynchos	Duck Stratum 2
20095	VCP	Anas platyrhynchos	Duck Stratum 2
20084	RPP25L	Anas platyrhynchos	Duck Stratum 2
20081	FAM219A	Anas platyrhynchos	Duck Stratum 2
20070	UBE2R2	Anas platyrhynchos	Duck Stratum 2
20071	UBAP2	Anas platyrhynchos	Duck Stratum 2
20053	C18orf25	Anas platyrhynchos	Duck Stratum 2
20452	SPIN1	Meleagris gallopavo	Neognathae Stratum 1
20435	HINT1	Meleagris gallopavo	Neognathae Stratum 1
20333	RASA1	Meleagris gallopavo	Neognathae Stratum 1
20152	NIPBL	Meleagris gallopavo	Galliform Stratum 2
20095	VCP	Meleagris gallopavo	Galliform Stratum 2
20071	UBAP2	Meleagris gallopavo	Galliform Stratum 2
20055	ATP5F1A	Meleagris gallopavo	Galliform Stratum 2
20044	SMAD2	Meleagris gallopavo	Galliform Stratum 2
20648	KCMF1	Gallus gallus	Avian Stratum 0
20478	HNRNPK	Gallus gallus	Neognathae Stratum 1
20452	SPIN1	Gallus gallus	Neognathae Stratum 1
20435	HINT1	Gallus gallus	Neognathae Stratum 1
20362	CHD1	Gallus gallus	Neognathae Stratum 1
20333	RASA1	Gallus gallus	Neognathae Stratum 1
20293	BTF3	Gallus gallus	Galliform Stratum 2
20226	ZSWIM6	Gallus gallus	Galliform Stratum 2
20217	GPBP1	Gallus gallus	Galliform Stratum 2
20216	MIER3	Gallus gallus	Galliform Stratum 2
20152	NIPBL	Gallus gallus	Galliform Stratum 2
20129	SUB1	Gallus gallus	Galliform Stratum 2
20128	ZFR	Gallus gallus	Galliform Stratum 2
20126	GOLPH3	Gallus gallus	Galliform Stratum 2
20095	VCP	Gallus gallus	Galliform Stratum 2
20070	UBE2R2	Gallus gallus	Galliform Stratum 2
20071	UBAP2	Gallus gallus	Galliform Stratum 2
20055	ATP5F1A	Gallus gallus	Galliform Stratum 2
20053	C18orf25	Gallus gallus	Galliform Stratum 2
20044	SMAD2	Gallus gallus	Galliform Stratum 2
20041	SMAD7	Gallus gallus	Galliform Stratum 2
20042	CTIF	Gallus gallus	Galliform Stratum 2
20038	RPL17	Gallus gallus	Galliform Stratum 2
20016	TXNL1	Gallus gallus	Galliform Stratum 2
20017	TCF4	Gallus gallus	Galliform Stratum 2
20014	ST8SIA3	Gallus gallus	Galliform Stratum 2
20009	NEDD4L	Gallus gallus	Galliform Stratum 2
20006	ZNF532	Gallus gallus	Galliform Stratum 2
20043	ZBTB7C	Calypte anna	Hummingbird Stratum 3
20040	DYM	Calypte anna	Hummingbird Stratum 3
20038	RPL17	Calypte anna	Hummingbird Stratum 3
20152	NIPBL	Chaetura pelagica	Neoaves Stratum 2
20040	DYM	Chaetura pelagica	Swift Stratum 3
20041	SMAD7	Chaetura pelagica	Swift Stratum 3
20496	RFK	Mesitornis unicolor	Neognathae Stratum 1
20440	NFIL3	Mesitornis unicolor	Neognathae Stratum 1
20342	ARRDC3	Mesitornis unicolor	Neognathae Stratum 1
20298	TNPO1	Mesitornis unicolor	Neoaves Stratum 2
20265	TBCA	Mesitornis unicolor	Neoaves Stratum 2
20250	MRPS36	Mesitornis unicolor	Neoaves Stratum 2
20227	KIF2A	Mesitornis unicolor	Neoaves Stratum 2
20217	GPBP1	Mesitornis unicolor	Neoaves Stratum 2
20188	PARP8	Mesitornis unicolor	Neoaves Stratum 2
20152	NIPBL	Mesitornis unicolor	Neoaves Stratum 2
20129	SUB1	Mesitornis unicolor	Neoaves Stratum 2
20128	ZFR	Mesitornis unicolor	Neoaves Stratum 2
20081	FAM219A	Mesitornis unicolor	Neoaves Stratum 2
20075	UBAP1	Mesitornis unicolor	Neoaves Stratum 2
20052	RNF165	Mesitornis unicolor	Mesite Stratum 3
20053	C18orf25	Mesitornis unicolor	Mesite Stratum 3
20049	PIAS2	Mesitornis unicolor	Mesite Stratum 3
20046	IER3IP1	Mesitornis unicolor	Mesite Stratum 3
20044	SMAD2	Mesitornis unicolor	Mesite Stratum 3
20037	LIPG	Mesitornis unicolor	Mesite Stratum 3
20298	TNPO1	Charadrius vociferus	Neoaves Stratum 2
20282	HMGCR	Charadrius vociferus	Neoaves Stratum 2
20280	CERT1	Charadrius vociferus	Neoaves Stratum 2
20263	SCAMP1	Charadrius vociferus	Neoaves Stratum 2
20257	HOMER1	Charadrius vociferus	Neoaves Stratum 2
20258	JMY	Charadrius vociferus	Neoaves Stratum 2
20194	FST	Charadrius vociferus	Neoaves Stratum 2
20160	RICTOR	Charadrius vociferus	Neoaves Stratum 2
20152	NIPBL	Charadrius vociferus	Neoaves Stratum 2
20126	GOLPH3	Charadrius vociferus	Neoaves Stratum 2
20081	FAM219A	Charadrius vociferus	Neoaves Stratum 2
20074	DCAF12	Charadrius vociferus	Neoaves Stratum 2
20510	ABHD17B	Nipponia nippon	Neognathae Stratum 1
20497	PCSK5	Nipponia nippon	Neognathae Stratum 1
20398	AP3S1	Nipponia nippon	Neognathae Stratum 1
20393	FEM1C	Nipponia nippon	Neognathae Stratum 1
20361	RGMB	Nipponia nippon	Neognathae Stratum 1
20342	ARRDC3	Nipponia nippon	Neognathae Stratum 1
20298	TNPO1	Nipponia nippon	Neoaves Stratum 2
20295	TMEM174	Nipponia nippon	Neoaves Stratum 2
20283	ANKRD31	Nipponia nippon	Neoaves Stratum 2
20257	HOMER1	Nipponia nippon	Neoaves Stratum 2
20255	CMYA5	Nipponia nippon	Neoaves Stratum 2
20241	SGTB	Nipponia nippon	Neoaves Stratum 2
20227	KIF2A	Nipponia nippon	Neoaves Stratum 2
20222	ELOVL7	Nipponia nippon	Neoaves Stratum 2
20220	PDE4D	Nipponia nippon	Neoaves Stratum 2
20216	MIER3	Nipponia nippon	Neoaves Stratum 2
20217	GPBP1	Nipponia nippon	Neoaves Stratum 2
20218	PLK2	Nipponia nippon	Neoaves Stratum 2
20203	CDC20B	Nipponia nippon	Neoaves Stratum 2
20196	ARL15	Nipponia nippon	Neoaves Stratum 2
20176	SELENOP	Nipponia nippon	Neoaves Stratum 2
20174	GHR	Nipponia nippon	Neoaves Stratum 2
20166	PRKAA1	Nipponia nippon	Neoaves Stratum 2
20167	RPL37	Nipponia nippon	Neoaves Stratum 2
20151	SLC1A3	Nipponia nippon	Neoaves Stratum 2
20152	NIPBL	Nipponia nippon	Neoaves Stratum 2
20153	CPLANE1	Nipponia nippon	Neoaves Stratum 2
20132	ADAMTS12	Nipponia nippon	Neoaves Stratum 2
20127	MTMR12	Nipponia nippon	Neoaves Stratum 2
20094	DNAJB5	Nipponia nippon	Neoaves Stratum 2
20078	LOC427400	Nipponia nippon	Neoaves Stratum 2
20068	AQP3	Nipponia nippon	Neoaves Stratum 2
20648	KCMF1	Phaethon lepturus	Avian Stratum 0
20635	ZNF462	Phaethon lepturus	Avian Stratum 0
20440	NFIL3	Phaethon lepturus	Neognathae Stratum 1
20393	FEM1C	Phaethon lepturus	Neognathae Stratum 1
20383	APC	Phaethon lepturus	Neognathae Stratum 1
20369	MACIR	Phaethon lepturus	Neognathae Stratum 1
20362	CHD1	Phaethon lepturus	Neognathae Stratum 1
20342	ARRDC3	Phaethon lepturus	Neognathae Stratum 1
20298	TNPO1	Phaethon lepturus	Neoaves Stratum 2
20297	FCHO2	Phaethon lepturus	Neoaves Stratum 2
20293	BTF3	Phaethon lepturus	Neoaves Stratum 2
20265	TBCA	Phaethon lepturus	Neoaves Stratum 2
20263	SCAMP1	Phaethon lepturus	Neoaves Stratum 2
20257	HOMER1	Phaethon lepturus	Neoaves Stratum 2
20258	JMY	Phaethon lepturus	Neoaves Stratum 2
20255	CMYA5	Phaethon lepturus	Neoaves Stratum 2
20232	RGS7BP	Phaethon lepturus	Neoaves Stratum 2
20216	MIER3	Phaethon lepturus	Neoaves Stratum 2
20193	MOCS2	Phaethon lepturus	Neoaves Stratum 2
20194	FST	Phaethon lepturus	Neoaves Stratum 2
20189	ISL1	Phaethon lepturus	Neoaves Stratum 2
20179	HMGCS1	Phaethon lepturus	Neoaves Stratum 2
20177	ZNF131	Phaethon lepturus	Neoaves Stratum 2
20169	C6	Phaethon lepturus	Neoaves Stratum 2
20167	RPL37	Phaethon lepturus	Neoaves Stratum 2
20163	DAB2	Phaethon lepturus	Neoaves Stratum 2
20156	GDNF	Phaethon lepturus	Neoaves Stratum 2
20129	SUB1	Phaethon lepturus	Neoaves Stratum 2
20126	GOLPH3	Phaethon lepturus	Neoaves Stratum 2
20124	CCBE1	Phaethon lepturus	Neoaves Stratum 2
20102	RUSC2	Phaethon lepturus	Neoaves Stratum 2
20094	DNAJB5	Phaethon lepturus	Neoaves Stratum 2
20085	DCTN3	Phaethon lepturus	Neoaves Stratum 2
20077	NUDT2	Phaethon lepturus	Neoaves Stratum 2
20074	DCAF12	Phaethon lepturus	Neoaves Stratum 2
20067	AQP7	Phaethon lepturus	Neoaves Stratum 2
20620	ZBTB5	Tyto alba	Avian Stratum 0
20482	UBQLN1	Tyto alba	Neognathae Stratum 1
20437	CDC42SE2	Tyto alba	Neognathae Stratum 1
20383	APC	Tyto alba	Neognathae Stratum 1
20280	CERT1	Tyto alba	Neoaves Stratum 2
20257	HOMER1	Tyto alba	Neoaves Stratum 2
20258	JMY	Tyto alba	Neoaves Stratum 2
20214	MAP3K1	Tyto alba	Neoaves Stratum 2
20177	ZNF131	Tyto alba	Neoaves Stratum 2
20152	NIPBL	Tyto alba	Neoaves Stratum 2
20129	SUB1	Tyto alba	Neoaves Stratum 2
20126	GOLPH3	Tyto alba	Neoaves Stratum 2
20099	FAM214B	Tyto alba	Neoaves Stratum 2
20094	DNAJB5	Tyto alba	Neoaves Stratum 2
20075	UBAP1	Tyto alba	Neoaves Stratum 2
20049	PIAS2	Tyto alba	Barn Owl Stratum 3
20044	SMAD2	Tyto alba	Barn Owl Stratum 3
20042	CTIF	Tyto alba	Barn Owl Stratum 3
20038	RPL17	Tyto alba	Barn Owl Stratum 3
20648	KCMF1	Pseudopodoces humilis	Avian Stratum 0
20617	SLC25A51	Pseudopodoces humilis	Avian Stratum 0
20534	RFX3	Pseudopodoces humilis	Avian Stratum 0
20490	GNAQ	Pseudopodoces humilis	Neognathae Stratum 1
20482	UBQLN1	Pseudopodoces humilis	Neognathae Stratum 1
20478	HNRNPK	Pseudopodoces humilis	Neognathae Stratum 1
20475	NTRK2	Pseudopodoces humilis	Neognathae Stratum 1
20462	PTCH1	Pseudopodoces humilis	Neognathae Stratum 1
20452	SPIN1	Pseudopodoces humilis	Neognathae Stratum 1
20440	NFIL3	Pseudopodoces humilis	Neognathae Stratum 1
20435	HINT1	Pseudopodoces humilis	Neognathae Stratum 1
20393	FEM1C	Pseudopodoces humilis	Neognathae Stratum 1
20394	TMED7	Pseudopodoces humilis	Neognathae Stratum 1
20362	CHD1	Pseudopodoces humilis	Neognathae Stratum 1
20333	RASA1	Pseudopodoces humilis	Neognathae Stratum 1
20320	CKMT2	Pseudopodoces humilis	Neognathae Stratum 1
20302	MAP1B	Pseudopodoces humilis	Neoaves Stratum 2
20297	FCHO2	Pseudopodoces humilis	Neoaves Stratum 2
20298	TNPO1	Pseudopodoces humilis	Neoaves Stratum 2
20293	BTF3	Pseudopodoces humilis	Neoaves Stratum 2
20280	CERT1	Pseudopodoces humilis	Neoaves Stratum 2
20263	SCAMP1	Pseudopodoces humilis	Neoaves Stratum 2
20244	SREK1	Pseudopodoces humilis	Neoaves Stratum 2
20226	ZSWIM6	Pseudopodoces humilis	Neoaves Stratum 2
20216	MIER3	Pseudopodoces humilis	Neoaves Stratum 2
20217	GPBP1	Pseudopodoces humilis	Neoaves Stratum 2
20198	SNX18	Pseudopodoces humilis	Neoaves Stratum 2
20182	PAIP1	Pseudopodoces humilis	Neoaves Stratum 2
20177	ZNF131	Pseudopodoces humilis	Neoaves Stratum 2
20166	PRKAA1	Pseudopodoces humilis	Neoaves Stratum 2
20167	RPL37	Pseudopodoces humilis	Neoaves Stratum 2
20152	NIPBL	Pseudopodoces humilis	Neoaves Stratum 2
20126	GOLPH3	Pseudopodoces humilis	Neoaves Stratum 2
20128	ZFR	Pseudopodoces humilis	Neoaves Stratum 2
20129	SUB1	Pseudopodoces humilis	Neoaves Stratum 2
20095	VCP	Pseudopodoces humilis	Neoaves Stratum 2
20081	FAM219A	Pseudopodoces humilis	Neoaves Stratum 2
20074	DCAF12	Pseudopodoces humilis	Neoaves Stratum 2
20075	UBAP1	Pseudopodoces humilis	Neoaves Stratum 2
20070	UBE2R2	Pseudopodoces humilis	Neoaves Stratum 2
20071	UBAP2	Pseudopodoces humilis	Neoaves Stratum 2
20055	ATP5F1A	Pseudopodoces humilis	Songbird Stratum 3
20053	C18orf25	Pseudopodoces humilis	Songbird Stratum 3
20049	PIAS2	Pseudopodoces humilis	Songbird Stratum 3
20044	SMAD2	Pseudopodoces humilis	Songbird Stratum 3
20027	SMAD4	Pseudopodoces humilis	Songbird Stratum 3
20648	KCMF1	Ficcedula albicollis	Avian Stratum 0
20635	ZNF462	Ficcedula albicollis	Avian Stratum 0
20625	RNF38	Ficcedula albicollis	Avian Stratum 0
20617	SLC25A51	Ficcedula albicollis	Avian Stratum 0
20537	CDC37L1	Ficcedula albicollis	Avian Stratum 0
20534	RFX3	Ficcedula albicollis	Avian Stratum 0
20507	ZFAND5	Ficcedula albicollis	Neognathae Stratum 1
20490	GNAQ	Ficcedula albicollis	Neognathae Stratum 1
20482	UBQLN1	Ficcedula albicollis	Neognathae Stratum 1
20478	HNRNPK	Ficcedula albicollis	Neognathae Stratum 1
20452	SPIN1	Ficcedula albicollis	Neognathae Stratum 1
20440	NFIL3	Ficcedula albicollis	Neognathae Stratum 1
20435	HINT1	Ficcedula albicollis	Neognathae Stratum 1
20393	FEM1C	Ficcedula albicollis	Neognathae Stratum 1
20362	CHD1	Ficcedula albicollis	Neognathae Stratum 1
20342	ARRDC3	Ficcedula albicollis	Neognathae Stratum 1
20333	RASA1	Ficcedula albicollis	Neognathae Stratum 1
20320	CKMT2	Ficcedula albicollis	Neognathae Stratum 1
20302	MAP1B	Ficcedula albicollis	Neoaves Stratum 2
20298	TNPO1	Ficcedula albicollis	Neoaves Stratum 2
20280	CERT1	Ficcedula albicollis	Neoaves Stratum 2
20250	MRPS36	Ficcedula albicollis	Neoaves Stratum 2
20244	SREK1	Ficcedula albicollis	Neoaves Stratum 2
20226	ZSWIM6	Ficcedula albicollis	Neoaves Stratum 2
20227	KIF2A	Ficcedula albicollis	Neoaves Stratum 2
20216	MIER3	Ficcedula albicollis	Neoaves Stratum 2
20198	SNX18	Ficcedula albicollis	Neoaves Stratum 2
20177	ZNF131	Ficcedula albicollis	Neoaves Stratum 2
20166	PRKAA1	Ficcedula albicollis	Neoaves Stratum 2
20167	RPL37	Ficcedula albicollis	Neoaves Stratum 2
20152	NIPBL	Ficcedula albicollis	Neoaves Stratum 2
20126	GOLPH3	Ficcedula albicollis	Neoaves Stratum 2
20128	ZFR	Ficcedula albicollis	Neoaves Stratum 2
20129	SUB1	Ficcedula albicollis	Neoaves Stratum 2
20095	VCP	Ficcedula albicollis	Neoaves Stratum 2
20081	FAM219A	Ficcedula albicollis	Neoaves Stratum 2
20074	DCAF12	Ficcedula albicollis	Neoaves Stratum 2
20075	UBAP1	Ficcedula albicollis	Neoaves Stratum 2
20071	UBAP2	Ficcedula albicollis	Neoaves Stratum 2
20055	ATP5F1A	Ficcedula albicollis	Songbird Stratum 3
20053	C18orf25	Ficcedula albicollis	Songbird Stratum 3
20044	SMAD2	Ficcedula albicollis	Songbird Stratum 3
20041	SMAD7	Ficcedula albicollis	Songbird Stratum 3
20042	CTIF	Ficcedula albicollis	Songbird Stratum 3
20027	SMAD4	Ficcedula albicollis	Songbird Stratum 3
20026	MEX3C	Ficcedula albicollis	Songbird Stratum 3
20648	KCMF1	Passer domesticus	Avian Stratum 0
20635	ZNF462	Passer domesticus	Avian Stratum 0
20534	RFX3	Passer domesticus	Avian Stratum 0
20507	ZFAND5	Passer domesticus	Neognathae Stratum 1
20490	GNAQ	Passer domesticus	Neognathae Stratum 1
20478	HNRNPK	Passer domesticus	Neognathae Stratum 1
20452	SPIN1	Passer domesticus	Neognathae Stratum 1
20435	HINT1	Passer domesticus	Neognathae Stratum 1
20362	CHD1	Passer domesticus	Neognathae Stratum 1
20342	ARRDC3	Passer domesticus	Neognathae Stratum 1
20320	CKMT2	Passer domesticus	Neognathae Stratum 1
20280	CERT1	Passer domesticus	Neoaves Stratum 2
20244	SREK1	Passer domesticus	Neoaves Stratum 2
20226	ZSWIM6	Passer domesticus	Neoaves Stratum 2
20227	KIF2A	Passer domesticus	Neoaves Stratum 2
20177	ZNF131	Passer domesticus	Neoaves Stratum 2
20167	RPL37	Passer domesticus	Neoaves Stratum 2
20152	NIPBL	Passer domesticus	Neoaves Stratum 2
20126	GOLPH3	Passer domesticus	Neoaves Stratum 2
20129	SUB1	Passer domesticus	Neoaves Stratum 2
20095	VCP	Passer domesticus	Neoaves Stratum 2
20081	FAM219A	Passer domesticus	Neoaves Stratum 2
20074	DCAF12	Passer domesticus	Neoaves Stratum 2
20075	UBAP1	Passer domesticus	Neoaves Stratum 2
20070	UBE2R2	Passer domesticus	Neoaves Stratum 2
20071	UBAP2	Passer domesticus	Neoaves Stratum 2
20055	ATP5F1A	Passer domesticus	Songbird Stratum 3
20053	C18orf25	Passer domesticus	Songbird Stratum 3
20041	SMAD7	Passer domesticus	Songbird Stratum 3
20038	RPL17	Passer domesticus	Songbird Stratum 3
20026	MEX3C	Passer domesticus	Songbird Stratum 3
20648	KCMF1	Serinus canaria	Avian Stratum 0
20537	CDC37L1	Serinus canaria	Avian Stratum 0
20534	RFX3	Serinus canaria	Avian Stratum 0
20490	GNAQ	Serinus canaria	Neognathae Stratum 1
20452	SPIN1	Serinus canaria	Neognathae Stratum 1
20435	HINT1	Serinus canaria	Neognathae Stratum 1
20393	FEM1C	Serinus canaria	Neognathae Stratum 1
20394	TMED7	Serinus canaria	Neognathae Stratum 1
20342	ARRDC3	Serinus canaria	Neognathae Stratum 1
20333	RASA1	Serinus canaria	Neognathae Stratum 1
20320	CKMT2	Serinus canaria	Neognathae Stratum 1
20302	MAP1B	Serinus canaria	Neoaves Stratum 2
20280	CERT1	Serinus canaria	Neoaves Stratum 2
20244	SREK1	Serinus canaria	Neoaves Stratum 2
20226	ZSWIM6	Serinus canaria	Neoaves Stratum 2
20182	PAIP1	Serinus canaria	Neoaves Stratum 2
20177	ZNF131	Serinus canaria	Neoaves Stratum 2
20166	PRKAA1	Serinus canaria	Neoaves Stratum 2
20167	RPL37	Serinus canaria	Neoaves Stratum 2
20152	NIPBL	Serinus canaria	Neoaves Stratum 2
20126	GOLPH3	Serinus canaria	Neoaves Stratum 2
20128	ZFR	Serinus canaria	Neoaves Stratum 2
20129	SUB1	Serinus canaria	Neoaves Stratum 2
20095	VCP	Serinus canaria	Neoaves Stratum 2
20081	FAM219A	Serinus canaria	Neoaves Stratum 2
20074	DCAF12	Serinus canaria	Neoaves Stratum 2
20075	UBAP1	Serinus canaria	Neoaves Stratum 2
20071	UBAP2	Serinus canaria	Neoaves Stratum 2
20055	ATP5F1A	Serinus canaria	Songbird Stratum 3
20053	C18orf25	Serinus canaria	Songbird Stratum 3
20044	SMAD2	Serinus canaria	Songbird Stratum 3
20041	SMAD7	Serinus canaria	Songbird Stratum 3
20027	SMAD4	Serinus canaria	Songbird Stratum 3
20026	MEX3C	Serinus canaria	Songbird Stratum 3
20648	KCMF1	Geospiza fortis	Avian Stratum 0
20617	SLC25A51	Geospiza fortis	Avian Stratum 0
20534	RFX3	Geospiza fortis	Avian Stratum 0
20507	ZFAND5	Geospiza fortis	Neognathae Stratum 1
20490	GNAQ	Geospiza fortis	Neognathae Stratum 1
20478	HNRNPK	Geospiza fortis	Neognathae Stratum 1
20452	SPIN1	Geospiza fortis	Neognathae Stratum 1
20394	TMED7	Geospiza fortis	Neognathae Stratum 1
20320	CKMT2	Geospiza fortis	Neognathae Stratum 1
20302	MAP1B	Geospiza fortis	Neoaves Stratum 2
20298	TNPO1	Geospiza fortis	Neoaves Stratum 2
20293	BTF3	Geospiza fortis	Neoaves Stratum 2
20294	FOXD1	Geospiza fortis	Neoaves Stratum 2
20280	CERT1	Geospiza fortis	Neoaves Stratum 2
20263	SCAMP1	Geospiza fortis	Neoaves Stratum 2
20244	SREK1	Geospiza fortis	Neoaves Stratum 2
20226	ZSWIM6	Geospiza fortis	Neoaves Stratum 2
20227	KIF2A	Geospiza fortis	Neoaves Stratum 2
20216	MIER3	Geospiza fortis	Neoaves Stratum 2
20198	SNX18	Geospiza fortis	Neoaves Stratum 2
20182	PAIP1	Geospiza fortis	Neoaves Stratum 2
20177	ZNF131	Geospiza fortis	Neoaves Stratum 2
20166	PRKAA1	Geospiza fortis	Neoaves Stratum 2
20167	RPL37	Geospiza fortis	Neoaves Stratum 2
20152	NIPBL	Geospiza fortis	Neoaves Stratum 2
20128	ZFR	Geospiza fortis	Neoaves Stratum 2
20095	VCP	Geospiza fortis	Neoaves Stratum 2
20074	DCAF12	Geospiza fortis	Neoaves Stratum 2
20075	UBAP1	Geospiza fortis	Neoaves Stratum 2
20070	UBE2R2	Geospiza fortis	Neoaves Stratum 2
20071	UBAP2	Geospiza fortis	Neoaves Stratum 2
20055	ATP5F1A	Geospiza fortis	Songbird Stratum 3
20053	C18orf25	Geospiza fortis	Songbird Stratum 3
20049	PIAS2	Geospiza fortis	Songbird Stratum 3
20044	SMAD2	Geospiza fortis	Songbird Stratum 3
20041	SMAD7	Geospiza fortis	Songbird Stratum 3
20027	SMAD4	Geospiza fortis	Songbird Stratum 3
20026	MEX3C	Geospiza fortis	Songbird Stratum 3
20648	KCMF1	Corvus brachyrhynchos	Avian Stratum 0
20631	PCGF3	Corvus brachyrhynchos	Avian Stratum 0
20537	CDC37L1	Corvus brachyrhynchos	Avian Stratum 0
20534	RFX3	Corvus brachyrhynchos	Avian Stratum 0
20517	APBA1	Corvus brachyrhynchos	Avian Stratum 0
20507	ZFAND5	Corvus brachyrhynchos	Neognathae Stratum 1
20490	GNAQ	Corvus brachyrhynchos	Neognathae Stratum 1
20478	HNRNPK	Corvus brachyrhynchos	Neognathae Stratum 1
20452	SPIN1	Corvus brachyrhynchos	Neognathae Stratum 1
20440	NFIL3	Corvus brachyrhynchos	Neognathae Stratum 1
20393	FEM1C	Corvus brachyrhynchos	Neognathae Stratum 1
20362	CHD1	Corvus brachyrhynchos	Neognathae Stratum 1
20342	ARRDC3	Corvus brachyrhynchos	Neognathae Stratum 1
20335	TMEM161B	Corvus brachyrhynchos	Neognathae Stratum 1
20333	RASA1	Corvus brachyrhynchos	Neognathae Stratum 1
20320	CKMT2	Corvus brachyrhynchos	Neognathae Stratum 1
20302	MAP1B	Corvus brachyrhynchos	Neoaves Stratum 2
20298	TNPO1	Corvus brachyrhynchos	Neoaves Stratum 2
20293	BTF3	Corvus brachyrhynchos	Neoaves Stratum 2
20294	FOXD1	Corvus brachyrhynchos	Neoaves Stratum 2
20280	CERT1	Corvus brachyrhynchos	Neoaves Stratum 2
20257	HOMER1	Corvus brachyrhynchos	Neoaves Stratum 2
20250	MRPS36	Corvus brachyrhynchos	Neoaves Stratum 2
20244	SREK1	Corvus brachyrhynchos	Neoaves Stratum 2
20226	ZSWIM6	Corvus brachyrhynchos	Neoaves Stratum 2
20227	KIF2A	Corvus brachyrhynchos	Neoaves Stratum 2
20216	MIER3	Corvus brachyrhynchos	Neoaves Stratum 2
20198	SNX18	Corvus brachyrhynchos	Neoaves Stratum 2
20177	ZNF131	Corvus brachyrhynchos	Neoaves Stratum 2
20166	PRKAA1	Corvus brachyrhynchos	Neoaves Stratum 2
20167	RPL37	Corvus brachyrhynchos	Neoaves Stratum 2
20152	NIPBL	Corvus brachyrhynchos	Neoaves Stratum 2
20129	SUB1	Corvus brachyrhynchos	Neoaves Stratum 2
20128	ZFR	Corvus brachyrhynchos	Neoaves Stratum 2
20126	GOLPH3	Corvus brachyrhynchos	Neoaves Stratum 2
20095	VCP	Corvus brachyrhynchos	Neoaves Stratum 2
20081	FAM219A	Corvus brachyrhynchos	Neoaves Stratum 2
20074	DCAF12	Corvus brachyrhynchos	Neoaves Stratum 2
20075	UBAP1	Corvus brachyrhynchos	Neoaves Stratum 2
20070	UBE2R2	Corvus brachyrhynchos	Neoaves Stratum 2
20071	UBAP2	Corvus brachyrhynchos	Neoaves Stratum 2
20055	ATP5F1A	Corvus brachyrhynchos	Songbird Stratum 3
20053	C18orf25	Corvus brachyrhynchos	Songbird Stratum 3
20044	SMAD2	Corvus brachyrhynchos	Songbird Stratum 3
20042	CTIF	Corvus brachyrhynchos	Songbird Stratum 3
20041	SMAD7	Corvus brachyrhynchos	Songbird Stratum 3
20038	RPL17	Corvus brachyrhynchos	Songbird Stratum 3
20039	C18orf32	Corvus brachyrhynchos	Songbird Stratum 3
20027	SMAD4	Corvus brachyrhynchos	Songbird Stratum 3
20026	MEX3C	Corvus brachyrhynchos	Songbird Stratum 3
20648	KCMF1	Parotia lawesii	Avian Stratum 0
20625	RNF38	Parotia lawesii	Avian Stratum 0
20617	SLC25A51	Parotia lawesii	Avian Stratum 0
20549	UHRF2	Parotia lawesii	Avian Stratum 0
20537	CDC37L1	Parotia lawesii	Avian Stratum 0
20534	RFX3	Parotia lawesii	Avian Stratum 0
20517	APBA1	Parotia lawesii	Avian Stratum 0
20490	GNAQ	Parotia lawesii	Neognathae Stratum 1
20482	UBQLN1	Parotia lawesii	Neognathae Stratum 1
20475	NTRK2	Parotia lawesii	Neognathae Stratum 1
20462	PTCH1	Parotia lawesii	Neognathae Stratum 1
20440	NFIL3	Parotia lawesii	Neognathae Stratum 1
20412	SNX2	Parotia lawesii	Neognathae Stratum 1
20435	HINT1	Parotia lawesii	Neognathae Stratum 1
20393	FEM1C	Parotia lawesii	Neognathae Stratum 1
20394	TMED7	Parotia lawesii	Neognathae Stratum 1
20391	PGGT1B	Parotia lawesii	Neognathae Stratum 1
20369	MACIR	Parotia lawesii	Neognathae Stratum 1
20362	CHD1	Parotia lawesii	Neognathae Stratum 1
20335	TMEM161B	Parotia lawesii	Neognathae Stratum 1
20333	RASA1	Parotia lawesii	Neognathae Stratum 1
20320	CKMT2	Parotia lawesii	Neognathae Stratum 1
20297	FCHO2	Parotia lawesii	Neoaves Stratum 2
20298	TNPO1	Parotia lawesii	Neoaves Stratum 2
20293	BTF3	Parotia lawesii	Neoaves Stratum 2
20294	FOXD1	Parotia lawesii	Neoaves Stratum 2
20280	CERT1	Parotia lawesii	Neoaves Stratum 2
20263	SCAMP1	Parotia lawesii	Neoaves Stratum 2
20257	HOMER1	Parotia lawesii	Neoaves Stratum 2
20244	SREK1	Parotia lawesii	Neoaves Stratum 2
20232	RGS7BP	Parotia lawesii	Neoaves Stratum 2
20226	ZSWIM6	Parotia lawesii	Neoaves Stratum 2
20198	SNX18	Parotia lawesii	Neoaves Stratum 2
20182	PAIP1	Parotia lawesii	Neoaves Stratum 2
20177	ZNF131	Parotia lawesii	Neoaves Stratum 2
20166	PRKAA1	Parotia lawesii	Neoaves Stratum 2
20167	RPL37	Parotia lawesii	Neoaves Stratum 2
20152	NIPBL	Parotia lawesii	Neoaves Stratum 2
20126	GOLPH3	Parotia lawesii	Neoaves Stratum 2
20128	ZFR	Parotia lawesii	Neoaves Stratum 2
20129	SUB1	Parotia lawesii	Neoaves Stratum 2
20099	FAM214B	Parotia lawesii	Neoaves Stratum 2
20095	VCP	Parotia lawesii	Neoaves Stratum 2
20076	KIF24	Parotia lawesii	Neoaves Stratum 2
20075	UBAP1	Parotia lawesii	Neoaves Stratum 2
20070	UBE2R2	Parotia lawesii	Neoaves Stratum 2
20071	UBAP2	Parotia lawesii	Neoaves Stratum 2
20060	SETBP1	Parotia lawesii	Songbird Stratum 3
20055	ATP5F1A	Parotia lawesii	Songbird Stratum 3
20053	C18orf25	Parotia lawesii	Songbird Stratum 3
20049	PIAS2	Parotia lawesii	Songbird Stratum 3
20042	CTIF	Parotia lawesii	Songbird Stratum 3
20041	SMAD7	Parotia lawesii	Songbird Stratum 3
20038	RPL17	Parotia lawesii	Songbird Stratum 3
20029	ME2	Parotia lawesii	Songbird Stratum 3
20030	MAPK4	Parotia lawesii	Songbird Stratum 3
20027	SMAD4	Parotia lawesii	Songbird Stratum 3
20648	KCMF1	Paradisaea raggiana	Avian Stratum 0
20635	ZNF462	Paradisaea raggiana	Avian Stratum 0
20617	SLC25A51	Paradisaea raggiana	Avian Stratum 0
20549	UHRF2	Paradisaea raggiana	Avian Stratum 0
20517	APBA1	Paradisaea raggiana	Avian Stratum 0
20507	ZFAND5	Paradisaea raggiana	Neognathae Stratum 1
20490	GNAQ	Paradisaea raggiana	Neognathae Stratum 1
20482	UBQLN1	Paradisaea raggiana	Neognathae Stratum 1
20478	HNRNPK	Paradisaea raggiana	Neognathae Stratum 1
20475	NTRK2	Paradisaea raggiana	Neognathae Stratum 1
20462	PTCH1	Paradisaea raggiana	Neognathae Stratum 1
20452	SPIN1	Paradisaea raggiana	Neognathae Stratum 1
20412	SNX2	Paradisaea raggiana	Neognathae Stratum 1
20393	FEM1C	Paradisaea raggiana	Neognathae Stratum 1
20394	TMED7	Paradisaea raggiana	Neognathae Stratum 1
20369	MACIR	Paradisaea raggiana	Neognathae Stratum 1
20362	CHD1	Paradisaea raggiana	Neognathae Stratum 1
20333	RASA1	Paradisaea raggiana	Neognathae Stratum 1
20320	CKMT2	Paradisaea raggiana	Neognathae Stratum 1
20302	MAP1B	Paradisaea raggiana	Neoaves Stratum 2
20297	FCHO2	Paradisaea raggiana	Neoaves Stratum 2
20298	TNPO1	Paradisaea raggiana	Neoaves Stratum 2
20293	BTF3	Paradisaea raggiana	Neoaves Stratum 2
20280	CERT1	Paradisaea raggiana	Neoaves Stratum 2
20244	SREK1	Paradisaea raggiana	Neoaves Stratum 2
20226	ZSWIM6	Paradisaea raggiana	Neoaves Stratum 2
20227	KIF2A	Paradisaea raggiana	Neoaves Stratum 2
20182	PAIP1	Paradisaea raggiana	Neoaves Stratum 2
20179	HMGCS1	Paradisaea raggiana	Neoaves Stratum 2
20177	ZNF131	Paradisaea raggiana	Neoaves Stratum 2
20166	PRKAA1	Paradisaea raggiana	Neoaves Stratum 2
20167	RPL37	Paradisaea raggiana	Neoaves Stratum 2
20152	NIPBL	Paradisaea raggiana	Neoaves Stratum 2
20128	ZFR	Paradisaea raggiana	Neoaves Stratum 2
20129	SUB1	Paradisaea raggiana	Neoaves Stratum 2
20095	VCP	Paradisaea raggiana	Neoaves Stratum 2
20081	FAM219A	Paradisaea raggiana	Neoaves Stratum 2
20074	DCAF12	Paradisaea raggiana	Neoaves Stratum 2
20070	UBE2R2	Paradisaea raggiana	Neoaves Stratum 2
20071	UBAP2	Paradisaea raggiana	Neoaves Stratum 2
20060	SETBP1	Paradisaea raggiana	Songbird Stratum 3
20055	ATP5F1A	Paradisaea raggiana	Songbird Stratum 3
20049	PIAS2	Paradisaea raggiana	Songbird Stratum 3
20044	SMAD2	Paradisaea raggiana	Songbird Stratum 3
20042	CTIF	Paradisaea raggiana	Songbird Stratum 3
20041	SMAD7	Paradisaea raggiana	Songbird Stratum 3
20038	RPL17	Paradisaea raggiana	Songbird Stratum 3
20029	ME2	Paradisaea raggiana	Songbird Stratum 3
20030	MAPK4	Paradisaea raggiana	Songbird Stratum 3
20027	SMAD4	Paradisaea raggiana	Songbird Stratum 3
20648	KCMF1	Paradisaea rubra	Avian Stratum 0
20635	ZNF462	Paradisaea rubra	Avian Stratum 0
20617	SLC25A51	Paradisaea rubra	Avian Stratum 0
20549	UHRF2	Paradisaea rubra	Avian Stratum 0
20537	CDC37L1	Paradisaea rubra	Avian Stratum 0
20517	APBA1	Paradisaea rubra	Avian Stratum 0
20482	UBQLN1	Paradisaea rubra	Neognathae Stratum 1
20478	HNRNPK	Paradisaea rubra	Neognathae Stratum 1
20475	NTRK2	Paradisaea rubra	Neognathae Stratum 1
20462	PTCH1	Paradisaea rubra	Neognathae Stratum 1
20440	NFIL3	Paradisaea rubra	Neognathae Stratum 1
20435	HINT1	Paradisaea rubra	Neognathae Stratum 1
20412	SNX2	Paradisaea rubra	Neognathae Stratum 1
20394	TMED7	Paradisaea rubra	Neognathae Stratum 1
20369	MACIR	Paradisaea rubra	Neognathae Stratum 1
20362	CHD1	Paradisaea rubra	Neognathae Stratum 1
20335	TMEM161B	Paradisaea rubra	Neognathae Stratum 1
20333	RASA1	Paradisaea rubra	Neognathae Stratum 1
20320	CKMT2	Paradisaea rubra	Neognathae Stratum 1
20302	MAP1B	Paradisaea rubra	Neoaves Stratum 2
20298	TNPO1	Paradisaea rubra	Neoaves Stratum 2
20293	BTF3	Paradisaea rubra	Neoaves Stratum 2
20294	FOXD1	Paradisaea rubra	Neoaves Stratum 2
20263	SCAMP1	Paradisaea rubra	Neoaves Stratum 2
20244	SREK1	Paradisaea rubra	Neoaves Stratum 2
20232	RGS7BP	Paradisaea rubra	Neoaves Stratum 2
20226	ZSWIM6	Paradisaea rubra	Neoaves Stratum 2
20227	KIF2A	Paradisaea rubra	Neoaves Stratum 2
20216	MIER3	Paradisaea rubra	Neoaves Stratum 2
20198	SNX18	Paradisaea rubra	Neoaves Stratum 2
20182	PAIP1	Paradisaea rubra	Neoaves Stratum 2
20179	HMGCS1	Paradisaea rubra	Neoaves Stratum 2
20177	ZNF131	Paradisaea rubra	Neoaves Stratum 2
20166	PRKAA1	Paradisaea rubra	Neoaves Stratum 2
20167	RPL37	Paradisaea rubra	Neoaves Stratum 2
20152	NIPBL	Paradisaea rubra	Neoaves Stratum 2
20128	ZFR	Paradisaea rubra	Neoaves Stratum 2
20129	SUB1	Paradisaea rubra	Neoaves Stratum 2
20126	GOLPH3	Paradisaea rubra	Neoaves Stratum 2
20099	FAM214B	Paradisaea rubra	Neoaves Stratum 2
20095	VCP	Paradisaea rubra	Neoaves Stratum 2
20074	DCAF12	Paradisaea rubra	Neoaves Stratum 2
20075	UBAP1	Paradisaea rubra	Neoaves Stratum 2
20071	UBAP2	Paradisaea rubra	Neoaves Stratum 2
20053	C18orf25	Paradisaea rubra	Songbird Stratum 3
20049	PIAS2	Paradisaea rubra	Songbird Stratum 3
20042	CTIF	Paradisaea rubra	Songbird Stratum 3
20038	RPL17	Paradisaea rubra	Songbird Stratum 3
20029	ME2	Paradisaea rubra	Songbird Stratum 3
20030	MAPK4	Paradisaea rubra	Songbird Stratum 3
20027	SMAD4	Paradisaea rubra	Songbird Stratum 3
20648	KCMF1	Cicinnurus regius	Avian Stratum 0
20631	PCGF3	Cicinnurus regius	Avian Stratum 0
20635	ZNF462	Cicinnurus regius	Avian Stratum 0
20625	RNF38	Cicinnurus regius	Avian Stratum 0
20617	SLC25A51	Cicinnurus regius	Avian Stratum 0
20549	UHRF2	Cicinnurus regius	Avian Stratum 0
20534	RFX3	Cicinnurus regius	Avian Stratum 0
20537	CDC37L1	Cicinnurus regius	Avian Stratum 0
20517	APBA1	Cicinnurus regius	Avian Stratum 0
20507	ZFAND5	Cicinnurus regius	Neognathae Stratum 1
20490	GNAQ	Cicinnurus regius	Neognathae Stratum 1
20482	UBQLN1	Cicinnurus regius	Neognathae Stratum 1
20478	HNRNPK	Cicinnurus regius	Neognathae Stratum 1
20475	NTRK2	Cicinnurus regius	Neognathae Stratum 1
20452	SPIN1	Cicinnurus regius	Neognathae Stratum 1
20440	NFIL3	Cicinnurus regius	Neognathae Stratum 1
20435	HINT1	Cicinnurus regius	Neognathae Stratum 1
20412	SNX2	Cicinnurus regius	Neognathae Stratum 1
20393	FEM1C	Cicinnurus regius	Neognathae Stratum 1
20394	TMED7	Cicinnurus regius	Neognathae Stratum 1
20391	PGGT1B	Cicinnurus regius	Neognathae Stratum 1
20369	MACIR	Cicinnurus regius	Neognathae Stratum 1
20362	CHD1	Cicinnurus regius	Neognathae Stratum 1
20335	TMEM161B	Cicinnurus regius	Neognathae Stratum 1
20333	RASA1	Cicinnurus regius	Neognathae Stratum 1
20320	CKMT2	Cicinnurus regius	Neognathae Stratum 1
20302	MAP1B	Cicinnurus regius	Neoaves Stratum 2
20297	FCHO2	Cicinnurus regius	Neoaves Stratum 2
20298	TNPO1	Cicinnurus regius	Neoaves Stratum 2
20293	BTF3	Cicinnurus regius	Neoaves Stratum 2
20294	FOXD1	Cicinnurus regius	Neoaves Stratum 2
20280	CERT1	Cicinnurus regius	Neoaves Stratum 2
20263	SCAMP1	Cicinnurus regius	Neoaves Stratum 2
20244	SREK1	Cicinnurus regius	Neoaves Stratum 2
20232	RGS7BP	Cicinnurus regius	Neoaves Stratum 2
20226	ZSWIM6	Cicinnurus regius	Neoaves Stratum 2
20227	KIF2A	Cicinnurus regius	Neoaves Stratum 2
20216	MIER3	Cicinnurus regius	Neoaves Stratum 2
20198	SNX18	Cicinnurus regius	Neoaves Stratum 2
20182	PAIP1	Cicinnurus regius	Neoaves Stratum 2
20177	ZNF131	Cicinnurus regius	Neoaves Stratum 2
20166	PRKAA1	Cicinnurus regius	Neoaves Stratum 2
20167	RPL37	Cicinnurus regius	Neoaves Stratum 2
20152	NIPBL	Cicinnurus regius	Neoaves Stratum 2
20129	SUB1	Cicinnurus regius	Neoaves Stratum 2
20128	ZFR	Cicinnurus regius	Neoaves Stratum 2
20126	GOLPH3	Cicinnurus regius	Neoaves Stratum 2
20099	FAM214B	Cicinnurus regius	Neoaves Stratum 2
20095	VCP	Cicinnurus regius	Neoaves Stratum 2
20076	KIF24	Cicinnurus regius	Neoaves Stratum 2
20074	DCAF12	Cicinnurus regius	Neoaves Stratum 2
20075	UBAP1	Cicinnurus regius	Neoaves Stratum 2
20070	UBE2R2	Cicinnurus regius	Neoaves Stratum 2
20071	UBAP2	Cicinnurus regius	Neoaves Stratum 2
20060	SETBP1	Cicinnurus regius	Songbird Stratum 3
20055	ATP5F1A	Cicinnurus regius	Songbird Stratum 3
20053	C18orf25	Cicinnurus regius	Songbird Stratum 3
20049	PIAS2	Cicinnurus regius	Songbird Stratum 3
20044	SMAD2	Cicinnurus regius	Songbird Stratum 3
20042	CTIF	Cicinnurus regius	Songbird Stratum 3
20041	SMAD7	Cicinnurus regius	Songbird Stratum 3
20038	RPL17	Cicinnurus regius	Songbird Stratum 3
20030	MAPK4	Cicinnurus regius	Songbird Stratum 3
20027	SMAD4	Cicinnurus regius	Songbird Stratum 3
20648	KCMF1	Cicinnurus magnificus	Avian Stratum 0
20631	PCGF3	Cicinnurus magnificus	Avian Stratum 0
20635	ZNF462	Cicinnurus magnificus	Avian Stratum 0
20625	RNF38	Cicinnurus magnificus	Avian Stratum 0
20617	SLC25A51	Cicinnurus magnificus	Avian Stratum 0
20549	UHRF2	Cicinnurus magnificus	Avian Stratum 0
20534	RFX3	Cicinnurus magnificus	Avian Stratum 0
20537	CDC37L1	Cicinnurus magnificus	Avian Stratum 0
20517	APBA1	Cicinnurus magnificus	Avian Stratum 0
20482	UBQLN1	Cicinnurus magnificus	Neognathae Stratum 1
20478	HNRNPK	Cicinnurus magnificus	Neognathae Stratum 1
20475	NTRK2	Cicinnurus magnificus	Neognathae Stratum 1
20462	PTCH1	Cicinnurus magnificus	Neognathae Stratum 1
20440	NFIL3	Cicinnurus magnificus	Neognathae Stratum 1
20435	HINT1	Cicinnurus magnificus	Neognathae Stratum 1
20412	SNX2	Cicinnurus magnificus	Neognathae Stratum 1
20393	FEM1C	Cicinnurus magnificus	Neognathae Stratum 1
20394	TMED7	Cicinnurus magnificus	Neognathae Stratum 1
20369	MACIR	Cicinnurus magnificus	Neognathae Stratum 1
20362	CHD1	Cicinnurus magnificus	Neognathae Stratum 1
20335	TMEM161B	Cicinnurus magnificus	Neognathae Stratum 1
20333	RASA1	Cicinnurus magnificus	Neognathae Stratum 1
20320	CKMT2	Cicinnurus magnificus	Neognathae Stratum 1
20302	MAP1B	Cicinnurus magnificus	Neoaves Stratum 2
20297	FCHO2	Cicinnurus magnificus	Neoaves Stratum 2
20298	TNPO1	Cicinnurus magnificus	Neoaves Stratum 2
20293	BTF3	Cicinnurus magnificus	Neoaves Stratum 2
20294	FOXD1	Cicinnurus magnificus	Neoaves Stratum 2
20280	CERT1	Cicinnurus magnificus	Neoaves Stratum 2
20263	SCAMP1	Cicinnurus magnificus	Neoaves Stratum 2
20257	HOMER1	Cicinnurus magnificus	Neoaves Stratum 2
20244	SREK1	Cicinnurus magnificus	Neoaves Stratum 2
20232	RGS7BP	Cicinnurus magnificus	Neoaves Stratum 2
20226	ZSWIM6	Cicinnurus magnificus	Neoaves Stratum 2
20227	KIF2A	Cicinnurus magnificus	Neoaves Stratum 2
20216	MIER3	Cicinnurus magnificus	Neoaves Stratum 2
20198	SNX18	Cicinnurus magnificus	Neoaves Stratum 2
20182	PAIP1	Cicinnurus magnificus	Neoaves Stratum 2
20177	ZNF131	Cicinnurus magnificus	Neoaves Stratum 2
20166	PRKAA1	Cicinnurus magnificus	Neoaves Stratum 2
20167	RPL37	Cicinnurus magnificus	Neoaves Stratum 2
20160	RICTOR	Cicinnurus magnificus	Neoaves Stratum 2
20152	NIPBL	Cicinnurus magnificus	Neoaves Stratum 2
20129	SUB1	Cicinnurus magnificus	Neoaves Stratum 2
20128	ZFR	Cicinnurus magnificus	Neoaves Stratum 2
20126	GOLPH3	Cicinnurus magnificus	Neoaves Stratum 2
20099	FAM214B	Cicinnurus magnificus	Neoaves Stratum 2
20081	FAM219A	Cicinnurus magnificus	Neoaves Stratum 2
20074	DCAF12	Cicinnurus magnificus	Neoaves Stratum 2
20075	UBAP1	Cicinnurus magnificus	Neoaves Stratum 2
20055	ATP5F1A	Cicinnurus magnificus	Songbird Stratum 3
20053	C18orf25	Cicinnurus magnificus	Songbird Stratum 3
20049	PIAS2	Cicinnurus magnificus	Songbird Stratum 3
20044	SMAD2	Cicinnurus magnificus	Songbird Stratum 3
20042	CTIF	Cicinnurus magnificus	Songbird Stratum 3
20041	SMAD7	Cicinnurus magnificus	Songbird Stratum 3
20038	RPL17	Cicinnurus magnificus	Songbird Stratum 3
20030	MAPK4	Cicinnurus magnificus	Songbird Stratum 3
20029	ME2	Cicinnurus magnificus	Songbird Stratum 3
30042	ZBTB47	Deinagkistrodon acutus	Colubroidea Stratum
30115	KLF6	Deinagkistrodon acutus	Colubroidea Stratum
30120	CUL2	Deinagkistrodon acutus	Colubroidea Stratum
30125	EPC1	Deinagkistrodon acutus	Colubroidea Stratum
30218	COMMD3	Deinagkistrodon acutus	Colubroidea Stratum
30219	BMI1	Deinagkistrodon acutus	Colubroidea Stratum
30224	PTF1A	Deinagkistrodon acutus	Colubroidea Stratum
30288	SP4	Deinagkistrodon acutus	Colubroidea Stratum
30380	STT3B	Deinagkistrodon acutus	Colubroidea Stratum
30514	CDK13	Deinagkistrodon acutus	Colubroidea Stratum
30605	EZH1	Deinagkistrodon acutus	Colubroidea Stratum
30612	PSME3	Deinagkistrodon acutus	Colubroidea Stratum
30699	NMT1	Deinagkistrodon acutus	Colubroidea Stratum
30709	PSMD11	Deinagkistrodon acutus	Colubroidea Stratum
30737	RUNDC3A	Deinagkistrodon acutus	Colubroidea Stratum
30740	KANSL1	Deinagkistrodon acutus	Colubroidea Stratum
30746	FBXL20	Deinagkistrodon acutus	Colubroidea Stratum
30748	CDK12	Deinagkistrodon acutus	Colubroidea Stratum
30765	PSMD3	Deinagkistrodon acutus	Colubroidea Stratum
30770	MSL1	Deinagkistrodon acutus	Colubroidea Stratum
30793	YTHDC1	Deinagkistrodon acutus	Colubroidea Stratum
30827	KPNB1	Deinagkistrodon acutus	Colubroidea Stratum
30835	SP2	Deinagkistrodon acutus	Colubroidea Stratum
30840	NFE2L1	Deinagkistrodon acutus	Colubroidea Stratum
30872	KAT7	Deinagkistrodon acutus	Colubroidea Stratum
30904	LASP1	Deinagkistrodon acutus	Colubroidea Stratum
30906	SCAF1	Deinagkistrodon acutus	Colubroidea Stratum
30915	AP2A1	Deinagkistrodon acutus	Colubroidea Stratum
30916	FUZ	Deinagkistrodon acutus	Colubroidea Stratum
30922	SNRNP70	Deinagkistrodon acutus	Colubroidea Stratum
30036	ARF1	Sistrurus miliarius	Colubroidea Stratum
30068	WDR48	Sistrurus miliarius	Colubroidea Stratum
30093	RBM33	Sistrurus miliarius	Colubroidea Stratum
30106	ZMYND11	Sistrurus miliarius	Colubroidea Stratum
30108	LARP4B	Sistrurus miliarius	Colubroidea Stratum
30115	KLF6	Sistrurus miliarius	Colubroidea Stratum
30125	EPC1	Sistrurus miliarius	Colubroidea Stratum
30134	WAC	Sistrurus miliarius	Colubroidea Stratum
30218	COMMD3	Sistrurus miliarius	Colubroidea Stratum
30219	BMI1	Sistrurus miliarius	Colubroidea Stratum
30301	TRA2A	Sistrurus miliarius	Colubroidea Stratum
30316	HOXA1	Sistrurus miliarius	Colubroidea Stratum
30360	UBE2E1	Sistrurus miliarius	Colubroidea Stratum
30380	STT3B	Sistrurus miliarius	Colubroidea Stratum
30393	SNRK	Sistrurus miliarius	Colubroidea Stratum
30449	CTNNB1	Sistrurus miliarius	Colubroidea Stratum
30496	SEPTIN7	Sistrurus miliarius	Colubroidea Stratum
30520	PSMA2	Sistrurus miliarius	Colubroidea Stratum
30535	EZH2	Sistrurus miliarius	Colubroidea Stratum
30612	PSME3	Sistrurus miliarius	Colubroidea Stratum
30623	BRCA1	Sistrurus miliarius	Colubroidea Stratum
30629	PIP4K2B	Sistrurus miliarius	Colubroidea Stratum
30690	FAM171A2	Sistrurus miliarius	Colubroidea Stratum
30699	NMT1	Sistrurus miliarius	Colubroidea Stratum
30703	HEXIM1	Sistrurus miliarius	Colubroidea Stratum
30709	PSMD11	Sistrurus miliarius	Colubroidea Stratum
30710	NSF	Sistrurus miliarius	Colubroidea Stratum
30720	TLK2	Sistrurus miliarius	Colubroidea Stratum
30735	UBTF	Sistrurus miliarius	Colubroidea Stratum
30737	RUNDC3A	Sistrurus miliarius	Colubroidea Stratum
30738	SLC25A39	Sistrurus miliarius	Colubroidea Stratum
30740	KANSL1	Sistrurus miliarius	Colubroidea Stratum
30741	CDC27	Sistrurus miliarius	Colubroidea Stratum
30746	FBXL20	Sistrurus miliarius	Colubroidea Stratum
30748	CDK12	Sistrurus miliarius	Colubroidea Stratum
30765	PSMD3	Sistrurus miliarius	Colubroidea Stratum
30770	MSL1	Sistrurus miliarius	Colubroidea Stratum
30775	RARA	Sistrurus miliarius	Colubroidea Stratum
30784	JUP	Sistrurus miliarius	Colubroidea Stratum
30792	UGT2A3	Sistrurus miliarius	Colubroidea Stratum
30793	YTHDC1	Sistrurus miliarius	Colubroidea Stratum
30809	STAT5B	Sistrurus miliarius	Colubroidea Stratum
30827	KPNB1	Sistrurus miliarius	Colubroidea Stratum
30835	SP2	Sistrurus miliarius	Colubroidea Stratum
30840	NFE2L1	Sistrurus miliarius	Colubroidea Stratum
30841	CBX1	Sistrurus miliarius	Colubroidea Stratum
30860	IGF2BP1	Sistrurus miliarius	Colubroidea Stratum
30869	SPOP	Sistrurus miliarius	Colubroidea Stratum
30872	KAT7	Sistrurus miliarius	Colubroidea Stratum
30873	DLX4	Sistrurus miliarius	Colubroidea Stratum
30874	DLX3	Sistrurus miliarius	Colubroidea Stratum
30875	ITGA3	Sistrurus miliarius	Colubroidea Stratum
30881	COL1A1	Sistrurus miliarius	Colubroidea Stratum
30894	LSM12	Sistrurus miliarius	Colubroidea Stratum
30896	HDAC5	Sistrurus miliarius	Colubroidea Stratum
30899	DDX42	Sistrurus miliarius	Colubroidea Stratum
30904	LASP1	Sistrurus miliarius	Colubroidea Stratum
30906	SCAF1	Sistrurus miliarius	Colubroidea Stratum
30907	RRAS	Sistrurus miliarius	Colubroidea Stratum
30908	PRR12	Sistrurus miliarius	Colubroidea Stratum
30916	FUZ	Sistrurus miliarius	Colubroidea Stratum
30947	TRIM28	Sistrurus miliarius	Colubroidea Stratum
30948	UBE2M	Sistrurus miliarius	Colubroidea Stratum
31030	SLC17A7	Sistrurus miliarius	Crotalus-Sisturus-Protobothrops Stratum
31044	PPP6R1	Sistrurus miliarius	Crotalus-Sisturus-Protobothrops Stratum
31045	HSPBP1	Sistrurus miliarius	Crotalus-Sisturus-Protobothrops Stratum
31050	TTYH1	Sistrurus miliarius	Crotalus-Sisturus-Protobothrops Stratum
31051	LENG8	Sistrurus miliarius	Crotalus-Sisturus-Protobothrops Stratum
31088	UBE2S	Sistrurus miliarius	Crotalus-Sisturus-Protobothrops Stratum
31097	RASIP1	Sistrurus miliarius	Crotalus-Sisturus-Protobothrops Stratum
31139	ASPHD1	Sistrurus miliarius	Crotalus-Sisturus-Protobothrops Stratum
31173	CA4	Sistrurus miliarius	Crotalus-Sisturus-Protobothrops Stratum
31194	FLT3LG	Sistrurus miliarius	Crotalus-Sisturus Stratum
30004	CAMP	Thamnophis elegans	Colubroidea Stratum
30042	ZBTB47	Thamnophis elegans	Colubroidea Stratum
30067	GORASP1	Thamnophis elegans	Colubroidea Stratum
30068	WDR48	Thamnophis elegans	Colubroidea Stratum
30093	RBM33	Thamnophis elegans	Colubroidea Stratum
30100	DNAJB6	Thamnophis elegans	Colubroidea Stratum
30115	KLF6	Thamnophis elegans	Colubroidea Stratum
30120	CUL2	Thamnophis elegans	Colubroidea Stratum
30125	EPC1	Thamnophis elegans	Colubroidea Stratum
30126	KIF5B	Thamnophis elegans	Colubroidea Stratum
30134	WAC	Thamnophis elegans	Colubroidea Stratum
30218	COMMD3	Thamnophis elegans	Colubroidea Stratum
30219	BMI1	Thamnophis elegans	Colubroidea Stratum
30288	SP4	Thamnophis elegans	Colubroidea Stratum
30366	TOP2B	Thamnophis elegans	Colubroidea Stratum
30380	STT3B	Thamnophis elegans	Colubroidea Stratum
30514	CDK13	Thamnophis elegans	Colubroidea Stratum
30535	EZH2	Thamnophis elegans	Colubroidea Stratum
30604	CNTNAP1	Thamnophis elegans	Colubroidea Stratum
30605	EZH1	Thamnophis elegans	Colubroidea Stratum
30642	DCAF7	Thamnophis elegans	Colubroidea Stratum
30709	PSMD11	Thamnophis elegans	Colubroidea Stratum
30720	TLK2	Thamnophis elegans	Colubroidea Stratum
30739	MAPT	Thamnophis elegans	Colubroidea Stratum
30740	KANSL1	Thamnophis elegans	Colubroidea Stratum
30765	PSMD3	Thamnophis elegans	Colubroidea Stratum
30769	NR1D1	Thamnophis elegans	Colubroidea Stratum
30770	MSL1	Thamnophis elegans	Colubroidea Stratum
30777	TOP2A	Thamnophis elegans	Colubroidea Stratum
30793	YTHDC1	Thamnophis elegans	Colubroidea Stratum
30809	STAT5B	Thamnophis elegans	Colubroidea Stratum
30823	SOCS7	Thamnophis elegans	Colubroidea Stratum
30826	NPEPPS	Thamnophis elegans	Colubroidea Stratum
30827	KPNB1	Thamnophis elegans	Colubroidea Stratum
30835	SP2	Thamnophis elegans	Colubroidea Stratum
30857	UBE2Z	Thamnophis elegans	Colubroidea Stratum
30865	ZNF652	Thamnophis elegans	Colubroidea Stratum
30894	LSM12	Thamnophis elegans	Colubroidea Stratum
30915	AP2A1	Thamnophis elegans	Colubroidea Stratum
30916	FUZ	Thamnophis elegans	Colubroidea Stratum
30922	SNRNP70	Thamnophis elegans	Colubroidea Stratum
30980	SRRM2	Thamnophis elegans	Colubridae-Elapidae Stratum
31044	PPP6R1	Thamnophis elegans	Colubridae Stratum
31105	RPL18	Thamnophis elegans	Colubridae Stratum
31140	SEZ6L2	Thamnophis elegans	Colubridae Stratum
31185	KAT8	Thamnophis elegans	Colubridae Stratum
31190	BCKDK	Thamnophis elegans	Colubridae Stratum
31196	PRF1	Thamnophis elegans	Colubridae Stratum
31236	SDR39U1	Thamnophis elegans	Colubridae Stratum
