# Supplementary material for: Dosage-sensitive functions in embryonic development drove the survival of genes on sex-specific chromosomes in snakes, birds, and mammals
Source: HighWire-hosted journal article supplement (doi:10.1101/gr.268516.120), 2021-01-21
Supplement: Supplemental_Table_S10.xlsx [file Supplemental_Table_S10.xlsx]

## Sheet: Sheet1
Supplemental Table S10. GO terms enriched in survivors in birds.
GO biological process complete	Non-survivors (505)	Survivors (166)	Expected	over/under represented	Fold-Enrichment	P value	FDR
GO molecular function complete	Non-survivors (505)	Survivors (166)	Expected	over/under represented	Fold-Enrichment	P value	FDR
GO cellular component complete	Non-survivors (505)	Survivors (166)	Expected	over/under represented	Fold-Enrichment	P value	FDR
