# Supplementary material for: Dosage-sensitive functions in embryonic development drove the survival of genes on sex-specific chromosomes in snakes, birds, and mammals
Source: HighWire-hosted journal article supplement (doi:10.1101/gr.268516.120), 2021-01-21
Supplement: Supplemental_Table_S11.xlsx [file Supplemental_Table_S11.xlsx]

## Sheet: Sheet1
Supplemental Table S11. GO terms enriched in survivors in therian mammals.
GO biological process complete	Non-survivors (552)	Survivors (47)	Expected	over/under represented	Fold-Enrichment	P value	FDR
blastocyst development (GO:0001824)	1	4	0.09	+	46.98	0.000158	0.0266
translational initiation (GO:0006413)	3	5	0.26	+	19.57	0.000113	0.0211
histone modification (GO:0016570)	12	8	1.02	+	7.83	4.88e-05	0.0149
negative regulation of transcription by RNA polymerase II (GO:0000122)	24	11	2.04	+	5.38	2.19e-05	0.0104
positive regulation of transcription by RNA polymerase II (GO:0045944)	28	10	2.38	+	4.19	0.000303	0.0405
nucleic acid metabolic process (GO:0090304)	57	15	4.85	+	3.09	0.000129	0.0232
GO molecular function complete	Non-survivors (552)	Survivors (47)	Expected	over/under represented	Fold-Enrichment	P value	FDR
transcription factor binding (GO:0008134)	15	8	1.28	+	6.26	0.000158	0.0214
RNA binding (GO:0003723)	41	15	3.49	+	4.3	4.49e-06	0.00162
sequence-specific DNA binding (GO:0043565)	33	12	2.81	+	4.27	5.61e-05	0.0101
double-stranded DNA binding (GO:0003690)	34	12	2.89	+	4.15	7.15e-05	0.0111
GO cellular component complete	Non-survivors (552)	Survivors (47)	Expected	over/under represented	Fold-Enrichment	P value	FDR
chromosome (GO:0005694)	49	13	4.17	+	3.12	0.000395	0.0422
nucleoplasm (GO:0005654)	106	25	9.03	+	2.77	8.48e-07	0.000635
