# Supplementary material for: Dosage-sensitive functions in embryonic development drove the survival of genes on sex-specific chromosomes in snakes, birds, and mammals
Source: HighWire-hosted journal article supplement (doi:10.1101/gr.268516.120), 2021-01-21
Supplement: Supplemental_Table_S12.xlsx [file Supplemental_Table_S12.xlsx]

## Sheet: Sheet1
Supplemental Table S12. GO terms enriched in survivors.
GO biological process complete	Non-survivors (2148)	Survivors (316)	Expected	over/under represented	Fold-Enrichment	P value	FDR
anaphase-promoting complex-dependent catabolic process (GO:0031145)	5	8	0.74	+	10.88	4.83e-05	0.00542
regulation of ubiquitin-protein transferase activity (GO:0051438)	4	6	0.59	+	10.2	0.000568	0.0466
histone monoubiquitination (GO:0010390)	4	6	0.59	+	10.2	0.000568	0.0462
face development (GO:0060324)	4	6	0.59	+	10.2	0.000568	0.0458
regulation of epithelial to mesenchymal transition (GO:0010717)	8	9	1.18	+	7.65	7.97e-05	0.00836
multicellular organism growth (GO:0035264)	9	8	1.32	+	6.04	0.000571	0.0457
kidney epithelium development (GO:0072073)	11	9	1.62	+	5.56	0.000386	0.034
positive regulation of chromatin organization (GO:1905269)	11	9	1.62	+	5.56	0.000386	0.0337
cellular response to alcohol (GO:0097306)	14	10	2.06	+	4.86	0.00039	0.0337
positive regulation of protein ubiquitination (GO:0031398)	17	11	2.5	+	4.4	0.000367	0.0329
protein polyubiquitination (GO:0000209)	31	18	4.56	+	3.95	1.48e-05	0.00185
regulation of mRNA metabolic process (GO:1903311)	33	15	4.85	+	3.09	0.000607	0.0478
regulation of protein catabolic process (GO:0042176)	44	20	6.47	+	3.09	7.53e-05	0.00799
in utero embryonic development (GO:0001701)	41	18	6.03	+	2.98	0.000244	0.0229
negative regulation of transcription by RNA polymerase II (GO:0000122)	90	39	13.24	+	2.95	7.76e-08	1.94e-05
regulation of mitotic cell cycle (GO:0007346)	73	27	10.74	+	2.51	9.06e-05	0.00931
positive regulation of transcription by RNA polymerase II (GO:0045944)	144	48	21.18	+	2.27	1.5e-06	0.000212
regulation of cellular catabolic process (GO:0031329)	94	30	13.83	+	2.17	0.000447	0.0379
symbiotic process (GO:0044403)	108	33	15.89	+	2.08	0.000374	0.0332
regulation of anatomical structure morphogenesis (GO:0022603)	140	39	20.6	+	1.89	0.000457	0.0385
nucleic acid metabolic process (GO:0090304)	254	65	37.37	+	1.74	4.64e-05	0.00533
regulation of signaling (GO:0023051)	436	92	64.14	+	1.43	0.000541	0.0448
GO molecular function complete	Non-survivors (2148)	Survivors (316)	Expected	over/under represented	Fold-Enrichment	P value	FDR
histone deacetylase binding (GO:0042826)	14	10	2.06	+	4.86	0.00039	0.0476
ubiquitin-like protein transferase activity (GO:0019787)	48	20	7.06	+	2.83	0.00027	0.0369
chromatin binding (GO:0003682)	80	33	11.77	+	2.8	1.91e-06	0.000737
RNA polymerase II cis-regulatory region sequence-specific DNA binding (GO:0000978)	103	36	15.15	+	2.38	1.85e-05	0.00614
RNA binding (GO:0003723)	175	55	25.74	+	2.14	1.24e-06	0.000575
transcription regulator activity (GO:0140110)	195	54	28.69	+	1.88	3.52e-05	0.00909
GO cellular component complete	Non-survivors (2148)	Survivors (316)	Expected	over/under represented	Fold-Enrichment	P value	FDR
nuclear ubiquitin ligase complex (GO:0000152)	2	7	0.29	+	23.79	1.53e-05	0.0012
ficolin-1-rich granule lumen (GO:1904813)	9	12	1.32	+	9.06	1.62e-06	0.000154
anchored component of plasma membrane (GO:0046658)	5	6	0.74	+	8.16	0.00112	0.039
proteasome complex (GO:0000502)	7	7	1.03	+	6.8	0.00082	0.0311
chromosomal region (GO:0098687)	30	14	4.41	+	3.17	0.000754	0.0294
nuclear speck (GO:0016607)	47	20	6.91	+	2.89	0.000243	0.0119
ribonucleoprotein complex (GO:1990904)	83	26	12.21	+	2.13	0.0011	0.0395
nuclear chromatin (GO:0000790)	150	42	22.07	+	1.9	0.000276	0.0131
cytosol (GO:0005829)	622	126	91.5	+	1.38	0.000137	0.00758
integral component of plasma membrane (GO:0005887)	225	15	33.1	-	0.45	0.000747	0.0301
Unclassified (UNCLASSIFIED)	133	4	19.57	-	0.2	6.29e-05	0.00418
