# Supplementary material for: Dosage-sensitive functions in embryonic development drove the survival of genes on sex-specific chromosomes in snakes, birds, and mammals
Source: HighWire-hosted journal article supplement (doi:10.1101/gr.268516.120), 2021-01-21
Supplement: Supplemental_Table_S13.xlsx [file Supplemental_Table_S13.xlsx]

## Sheet: Sheet1
Supplemental Table S13. Ficolin-1-rich granule lumen components among ancestral genes.
Gene Symbol	Lineage	Survivor	Syndrome	OMIM	Reference
ACLY	Snakes	No
ALDOA	Snakes	No	Glycogen storage disease XII	611881	(Kishi et al. 1987)
ARSB	Birds	No	Mucopolysaccharidosis type VI (Maroteaux-Lamy)	253200	(Wicker et al. 1991)
CDK13	Snakes	Yes	Congenital heart defects, dysmorphic facial features, and intellectual developmental disorder (CHDFIDD)	617360	(Sifrim et al. 2016)
COMMD3	Snakes	Yes
DDX3X	Mammals	Yes	Mental retardation, X-linked 102	300958	(Snijders Blok et al. 2015)
FTH1	Snakes	No	Hemochromatosis, type 5	615517	(Kato et al. 2001)
GLB1	Snakes	No	GM1-gangliosidosis, type I; GM1-gangliosidosis, type II; GM1-gangliosidosis, type III; Mucopolysaccharidosis type IVB (Morquio)	230500; 230600; 230650; 253010	(Yoshida et al. 1991; Nishimoto et al. 1991; Chakraborty et al. 1994; Oshima et al. 1991)
HUWE1	Mammals	Yes	Mental retardation, X-linked syndromic, Turner type	309590	(Moortgat et al. 2018)
JUP	Snakes	Yes	Arrhythmogenic right ventricular dysplasia 12; Naxos disease	611528; 601214	(Asimaki et al. 2007; McKoy et al. 2000)
KCMF1	Birds	Yes
KPNB1	Snakes	Yes
MMTAG2	Snakes	No
MVP	Snakes	No
OSTF1	Birds	Yes
PNP	Snakes	No	Immunodeficiency due to purine nucleoside phosphorylase deficiency	613179	(Williams et al. 1987)
PRDX4	Mammals	No
PSMA2	Snakes	Yes
PSMD11	Snakes	Yes
PSMD3	Snakes	Yes
VCP	Birds	Yes	Amyotrophic lateral sclerosis 14, with or without frontotemporal dementia; Charcot-Marie-Tooth disease, type 2Y; Inclusion body myopathy with early-onset Paget disease and frontotemporal dementia 1 (IBMPFD1)	613954; 616687; 167320	(Johnson et al. 2010; Watts et al. 2004; Gonzalez et al. 2014)
