# Supplementary material for: Dosage-sensitive functions in embryonic development drove the survival of genes on sex-specific chromosomes in snakes, birds, and mammals
Source: HighWire-hosted journal article supplement (doi:10.1101/gr.268516.120), 2021-01-21
Supplement: Supplemental_Table_S14.xlsx [file Supplemental_Table_S14.xlsx]

## Sheet: Sheet1
Supplemental Table S14. Avian Stratum Boundaries.
Name	Max Branch Length	Proximal Z	Distal Z	Struthio camelus	Dromaius novaehollandiae	Tinamus guttatus	Anas platyrhynchos	Meleagris gallopavo	Gallus gallus	Calypte anna	Chaetura pelagica	Mesitornis unicolor	Charadrius vociferus	Nipponia nippon	Phaethon lepturus	Tyto alba	Pseudopodoces humilis	Ficedula albicollis	Passer domesticus	Serinus canaria	Geospiza fortis	Corvus brachyrhynchos	Parotia lawesii	Paradisaea raggiana	Paradisaea rubra	Cicinnurus regius	Cicinnurus magnificus	Citation
Avian Stratum 0	1443.04	APBA1	TOPORS	S0	S0	S0	S0	S0	S0	S0	S0	S0	S0	S0	S0	S0	S0	S0	S0	S0	S0	S0	S0	S0	S0	S0	S0	(Vicoso et al. 2013b)
Neognathae Stratum 1	1136.04	CARTPT	PTAR1	-	-	-	S1	S1	S1	S1	S1	S1	S1	S1	S1	S1	S1	S1	S1	S1	S1	S1	S1	S1	S1	S1	S1	(Vicoso et al. 2013b)
Ostrich Stratum 1	75	CNTNAP4	PTAR1	S1	-	-	-	-	-	-	-	-	-	-	-	-	-	-	-	-	-	-	-	-	-	-	-	(Zhou et al. 2014; Wang et al. 2019)
Emu Stratum 1	22.9	RASEF	PTAR1	-	S1	-	-	-	-	-	-	-	-	-	-	-	-	-	-	-	-	-	-	-	-	-	-	(Zhou et al. 2014; Wang et al. 2019)
Tinamide Stratum 1	49.2	PJA2	PTAR1	-	-	S1	-	-	-	-	-	-	-	-	-	-	-	-	-	-	-	-	-	-	-	-	-	(Zhou et al. 2014; Wang et al. 2019)
Tinamus Stratum 2	40.9	MEXC3	FER	-	-	S2	-	-	-	-	-	-	-	-	-	-	-	-	-	-	-	-	-	-	-	-	-	(Zhou et al. 2014; Wang et al. 2019)
Duck Stratum 2	39	SMAD7	MAP1B	-	-	-	S2	-	-	-	-	-	-	-	-	-	-	-	-	-	-	-	-	-	-	-	-	(Handley et al. 2004; Wright et al. 2014)
Galliform Stratum 2	74	LMAN1	MAP1B	-	-	-	-	S2	S2	-	-	-	-	-	-	-	-	-	-	-	-	-	-	-	-	-	-	(Handley et al. 2004; Wright et al. 2014)
Neoaves Stratum 2	911.04	CELF4	MAP1B	-	-	-	-	-	-	S2	S2	S2	S2	S2	S2	S2	S2	S2	S2	S2	S2	S2	S2	S2	S2	S2	S2	(Zhou et al. 2014)
Hummingbird Stratum 3	57	TCF4	PIK3C3	-	-	-	-	-	-	S3	-	-	-	-	-	-	-	-	-	-	-	-	-	-	-	-	-	(Zhou et al. 2014)
Swift Stratum 3	57	MYO5B	PIK3C3	-	-	-	-	-	-	-	S3	-	-	-	-	-	-	-	-	-	-	-	-	-	-	-	-	(Zhou et al. 2014)
Mesite Stratum 3	47.4	CXXC1	PIK3C3	-	-	-	-	-	-	-	-	S3	-	-	-	-	-	-	-	-	-	-	-	-	-	-	-	(Zhou et al. 2014)
Killdeer Stratum 3	45	SKOR2	PIK3C3	-	-	-	-	-	-	-	-	-	S3	-	-	-	-	-	-	-	-	-	-	-	-	-	-	(Zhou et al. 2014)
Ibis Stratum 3	53	LOXHD1	PIK3C3	-	-	-	-	-	-	-	-	-	-	S3	-	-	-	-	-	-	-	-	-	-	-	-	-	(Zhou et al. 2014)
Barn Owl Stratum 3	49.6	DCC	PIK3C3	-	-	-	-	-	-	-	-	-	-	-	-	S3	-	-	-	-	-	-	-	-	-	-	-	(Zhou et al. 2014)
Songbird Stratum 3	322.04	MEX3C	PIK3C3	-	-	-	-	-	-	-	-	-	-	-	-	-	S3	S3	S3	S3	S3	S3	S3	S3	S3	S3	S3	(Zhou et al. 2014; Xu et al. 2019b)
