# Supplementary material for: Dosage-sensitive functions in embryonic development drove the survival of genes on sex-specific chromosomes in snakes, birds, and mammals
Source: HighWire-hosted journal article supplement (doi:10.1101/gr.268516.120), 2021-01-21
Supplement: Supplemental_Table_S15.xlsx [file Supplemental_Table_S15.xlsx]

## Sheet: Sheet1
Supplemental Table S15. Mammalian Stratum Boundaries.
Name	Max Branch Length	Proximal X	Distal X	Homo sapiens	Pan troglodytes	Gorilla gorilla	Macaca mulatta	Callithrix jacchus	Mus musculus	Rattus norvegicus	Canis lupus familiaris	Felis catus	Equus ferus caballus	Bos taurus	Sus scrofa	Monodelphis domestica	Macropus eugenii	Citation
PAR	0	-	-	-	-	-	-	-	-	-	-	-	-	-	-	-	-	(Bellott et al. 2014)
Marmoset S5	13	PLCXD1	PRKX	-	-	-	-	S5	-	-	-	-	-	-	-	-	-	(Bellott et al. 2014)
Catarrhine S5	74.18	GYG2	PRKX	S5	S5	S5	S5	-	-	-	-	-	-	-	-	-	-	(Bellott et al. 2014)
Simian S4	131.14	NLGN4X	MID1	S4	S4	S4	S4	S4	-	-	-	-	-	-	-	-	-	(Bellott et al. 2014)
Horse S4	9.2	NLGN4X	MID1	-	-	-	-	-	-	-	-	-	S4	-	-	-	-	(Janečka et al. 2018)
Bovid S4	24.6	SHROOM2	MID1	-	-	-	-	-	-	-	-	-	-	S4	-	-	-	(Van Laere et al. 2008)
Carnivore S4	110	TETY2	MID1	-	-	-	-	-	-	-	S4	S4	-	-	-	-	-	(Murphy et al. 2007; Li et al. 2013)
Pig S4	62	WWC3	MID1	-	-	-	-	-	-	-	-	-	-	-	S4	-	-	(Van Laere et al. 2008; Skinner et al. 2016)
Eutherian S2/S3	662.84	HCCS	ZXDA	S2/S3	S2/S3	S2/S3	S2/S3	S2/S3	S2/S3	S2/S3	S2/S3	S2/S3	S2/S3	S2/S3	S2/S3	-	-	(Bellott et al. 2014)
Eutherian S2/S3	662.84	HMGB3	WASH6P	S2/S3	S2/S3	S2/S3	S2/S3	S2/S3	S2/S3	S2/S3	S2/S3	S2/S3	S2/S3	S2/S3	S2/S3	-	-	(Bellott et al. 2014)
Catarrhine OFD1 X transposed region	74.18	RAB9A	OFD1	OFD1-XTR	OFD1-XTR	OFD1-XTR	OFD1-XTR	-	-	-	-	-	-	-	-	-	-	(Ferrante et al. 2003; Chang et al. 2011; Bellott et al. 2014)
Horse OFD1 X transposed region	7.7	OFD1	OFD1	-	-	-	-	-	-	-	-	-	OFD1-XTR	-	-	-	-	(Janečka et al. 2018) (horse-donkey divergence)
Pig OFD1 X transposed region	62	TRAPPC2	GPM6B	-	-	-	-	-	-	-	-	-	-	-	OFD1-XTR	-	-	(Skinner et al. 2016)
Dog OFD1 X transposed region	46	TRAPPC2	GPM6B	-	-	-	-	-	-	-	OFD1-XTR	-	-	-	-	-	-	(Li et al. 2013) (after divergence with giant panda)
Rat MED14 X transposed region	20.9	MED14	MED14	-	-	-	-	-	-	MED14-XTR	-	-	-	-	-	-	-	(Bellott et al. 2014)
Metatherian S2	164	RBM10	ZXDA	-	-	-	-	-	-	-	-	-	-	-	-	S2	S2	(Bellott et al. 2014)
Metatherian S2	164	HMGB3	WASH6P	-	-	-	-	-	-	-	-	-	-	-	-	S2	S2	(Bellott et al. 2014)
Therian S1	966.84	ARHGEF9	CD99L2	S1	S1	S1	S1	S1	S1	S1	S1	S1	S1	S1	S1	S1	S1	(Bellott et al. 2014)
Human PCDH11X X-transposed region	6.7	PCDH11X	PCDH11X	PCDH11X-XTR	-	-	-	-	-	-	-	-	-	-	-	-	-	(Skaletsky et al. 2003)
Marmoset THOC2 X-transposed region	43.2	THOC2	THOC2	-	-	-	-	THOC2-XTR	-	-	-	-	-	-	-	-	-	(Bellott et al. 2014)
