# Supplementary material for: Dosage-sensitive functions in embryonic development drove the survival of genes on sex-specific chromosomes in snakes, birds, and mammals
Source: HighWire-hosted journal article supplement (doi:10.1101/gr.268516.120), 2021-01-21
Supplement: Supplemental_Table_S16.xlsx [file Supplemental_Table_S16.xlsx]

## Sheet: Sheet1
Supplemental Table S16. Surviving ancestral genes adjacent on the ancestral autosomes.
First Gene		Second Gene
Number	Symbol	Number	Symbol	Species	Stratum
20038	RPL17	20039	C18orf32	Corvus brachyrhynchos	Songbird Stratum 3
20052	RNF165	20053	C18orf25	Mesitornis unicolor	Mesite Stratum 3
20128	ZFR	20129	SUB1	Mesitornis unicolor, Pseudopodoces humilis, Ficedula albicollis, Serinus canaria, Corvus brachyrhynchos, Parotia lawesii, Paradisaea raggiana, Paradisaea rubra, Cicinnurus regius, Cicinnurus magnificus	Neoaves Stratum 2
20016	TXNL1	20017	TCF4	Gallus gallus	Galliform Stratum 2
20041	SMAD7	20042	CTIF	Gallus gallus	Galliform Stratum 2
20070	UBE2R2	20071	UBAP2	Gallus gallus	Galliform Stratum 2
20128	ZFR	20129	SUB1	Gallus gallus	Galliform Stratum 2
20216	MIER3	20217	GPBP1	Gallus gallus	Galliform Stratum 2
20040	DYM	20041	SMAD7	Chaetura pelagica	Swift Stratum 3
20041	SMAD7	20042	CTIF	Ficedula albicollis, Corvus brachyrhynchos, Parotia lawesii, Paradisaea raggiana, Cicinnurus regius, Cicinnurus magnificus	Songbird Stratum 3
20026	MEX3C	20027	SMAD4	Ficedula albicollis, Serinus canaria, Geospiza fortis, Corvus brachyrhynchos	Songbird Stratum 3
20226	ZSWIM6	20227	KIF2A	Ficedula albicollis, Passer domesticus, Geospiza fortis, Corvus brachyrhynchos, Paradisaea raggiana, Paradisaea rubra, Cicinnurus regius, Cicinnurus magnificus	Neoaves Stratum 2
10010	P2RY8	10011	AKAP17A	Callithrix jacchus	Marmoset S5
20151	SLC1A3	20152	NIPBL	Nipponia nippon	Neoaves Stratum 2
20152	NIPBL	20153	CPLANE1	Nipponia nippon	Neoaves Stratum 2
20217	GPBP1	20218	PLK2	Nipponia nippon	Neoaves Stratum 2
20216	MIER3	20217	GPBP1	Nipponia nippon, Pseudopodoces humilis	Neoaves Stratum 2
20166	PRKAA1	20167	RPL37	Nipponia nippon, Pseudopodoces humilis, Ficedula albicollis, Serinus canaria, Geospiza fortis, Corvus brachyrhynchos, Parotia lawesii, Paradisaea raggiana, Paradisaea rubra, Cicinnurus regius, Cicinnurus magnificus	Neoaves Stratum 2
20070	UBE2R2	20071	UBAP2	Anas platyrhynchos	Duck Stratum 2
30915	AP2A1	30916	FUZ	Deinagkistrodon acutus, Thamnophis elegans	Colubroidea Stratum
30218	COMMD3	30219	BMI1	Deinagkistrodon acutus, Sistrurus miliarius, Thamnophis elegans	Colubroidea Stratum
10067	ZRSR2	10068	AP1S2	Equus ferus caballus	Eutherian S2/S3
10252	TSPYL2	10253	KDM5C	Homo sapiens Pan troglodytes, Gorilla gorilla, Macaca mulatta, Callithrix jacchus, Rattus norvegicus, Canis lupus familiaris, Felis catus, Equus ferus caballus	Eutherian S2/S3
10157	USP9X	10158	DDX3X	Homo sapiens Gorilla gorilla, Macaca mulatta, Callithrix jacchus, Mus musculus, Rattus norvegicus, Canis lupus familiaris, Felis catus, Equus ferus caballus, Bos taurus, Sus scrofa	Eutherian S2/S3
20257	HOMER1	20258	JMY	Charadrius vociferus, Phaethon lepturus, Tyto alba	Neoaves Stratum 2
20075	UBAP1	20076	KIF24	Parotia lawesii	Neoaves Stratum 2
20029	ME2	20030	MAPK4	Parotia lawesii, Paradisaea raggiana, Paradisaea rubra, Cicinnurus magnificus	Songbird Stratum 3
20294	FOXD1	20295	TMEM174	Geospiza fortis, Corvus brachyrhynchos, Paradisaea rubra, Cicinnurus regius, Cicinnurus magnificus	Neoaves Stratum 2
30067	GORASP1	30068	WDR48	Thamnophis elegans	Colubroidea Stratum
30125	EPC1	30126	KIF5B	Thamnophis elegans	Colubroidea Stratum
30604	CNTNAP1	30605	EZH1	Thamnophis elegans	Colubroidea Stratum
30739	MAPT	30740	KANSL1	Thamnophis elegans	Colubroidea Stratum
30769	NR1D1	30770	MSL1	Thamnophis elegans	Colubroidea Stratum
30826	NPEPPS	30827	KPNB1	Thamnophis elegans	Colubroidea Stratum
10109	EIF2S3	10110	ZFX	Mus musculus, Rattus norvegicus, Canis lupus familiaris, Felis catus, Equus ferus caballus, Bos taurus, Sus scrofa	Eutherian S2/S3
10178	RBM10	10179	UBA1	Monodelphis domestica, Macropus eugenii	Metatherian S2
20468	DAPK1	20469	GAS1	Struthio camelus	Ostrich Stratum 1
20469	GAS1	20470	TUT7	Struthio camelus	Ostrich Stratum 1
20470	TUT7	20471	ISCA1	Struthio camelus	Ostrich Stratum 1
20471	ISCA1	20472	GOLM1	Struthio camelus	Ostrich Stratum 1
20511	CEMIP2	20512	TRPM3	Struthio camelus	Ostrich Stratum 1
30709	PSMD11	30710	NSF	Sistrurus miliarius	Colubroidea Stratum
30737	RUNDC3A	30738	SLC25A39	Sistrurus miliarius	Colubroidea Stratum
30740	KANSL1	30741	CDC27	Sistrurus miliarius	Colubroidea Stratum
30792	UGT2A3	30793	YTHDC1	Sistrurus miliarius	Colubroidea Stratum
30840	NFE2L1	30841	CBX1	Sistrurus miliarius	Colubroidea Stratum
30872	KAT7	30873	DLX4	Sistrurus miliarius	Colubroidea Stratum
30873	DLX4	30874	DLX3	Sistrurus miliarius	Colubroidea Stratum
30874	DLX3	30875	ITGA3	Sistrurus miliarius	Colubroidea Stratum
30906	SCAF1	30907	RRAS	Sistrurus miliarius	Colubroidea Stratum
30907	RRAS	30908	PRR12	Sistrurus miliarius	Colubroidea Stratum
30947	TRIM28	30948	UBE2M	Sistrurus miliarius	Colubroidea Stratum
31044	PPP6R1	31045	HSPBP1	Sistrurus miliarius	Crotalus-Sisturus-Protobothrops Stratum
31050	TTYH1	31051	LENG8	Sistrurus miliarius	Crotalus-Sisturus-Protobothrops Stratum
10022	MXRA5	10023	PRKX	Macaca mulatta	Catarrhine S5
20074	DCAF12	20075	UBAP1	Pseudopodoces humilis, Ficedula albicollis, Passer domesticus, Serinus canaria, Geospiza fortis, Corvus brachyrhynchos, Paradisaea rubra, Cicinnurus regius, Cicinnurus magnificus	Neoaves Stratum 2
20393	FEM1C	20394	TMED7	Pseudopodoces humilis, Serinus canaria, Parotia lawesii, Paradisaea raggiana, Cicinnurus regius, Cicinnurus magnificus	Neognathae Stratum 1
20070	UBE2R2	20071	UBAP2	Pseudopodoces humilis, Passer domesticus, Geospiza fortis, Corvus brachyrhynchos, Parotia lawesii, Paradisaea raggiana, Cicinnurus regius	Neoaves Stratum 2
20068	AQP3	20069	NOL6	Tinamus guttatus	Tinamus Stratum 2
20085	DCTN3	20086	ARID3C	Tinamus guttatus	Tinamus Stratum 2
20136	C1QTNF3	20137	RAI14	Tinamus guttatus	Tinamus Stratum 2
20149	NADK2	20150	RANBP3L	Tinamus guttatus	Tinamus Stratum 2
20150	RANBP3L	20151	SLC1A3	Tinamus guttatus	Tinamus Stratum 2
20157	EGFLAM	20158	LIFR	Tinamus guttatus	Tinamus Stratum 2
20166	PRKAA1	20167	RPL37	Tinamus guttatus	Tinamus Stratum 2
20193	MOCS2	20194	FST	Tinamus guttatus	Tinamus Stratum 2
20240	TRAPPC13	20241	SGTB	Tinamus guttatus	Tinamus Stratum 2
20243	ERBIN	20244	SREK1	Tinamus guttatus	Tinamus Stratum 2
20257	HOMER1	20258	JMY	Tinamus guttatus	Tinamus Stratum 2
20297	FCHO2	20298	TNPO1	Tinamus guttatus	Tinamus Stratum 2
20335	TMEM161B	20336	MEF2C	Tinamus guttatus	Tinamus Stratum 2
20439	ROR2	20440	NFIL3	Tinamus guttatus	Tinamidae Stratum 1
20067	AQP7	20068	AQP3	Phaethon lepturus	Neoaves Stratum 2
20193	MOCS2	20194	FST	Phaethon lepturus	Neoaves Stratum 2
20297	FCHO2	20298	TNPO1	Phaethon lepturus, Pseudopodoces humilis, Parotia lawesii, Paradisaea raggiana, Cicinnurus regius, Cicinnurus magnificus	Neoaves Stratum 2
