# Supplementary material for: Dosage-sensitive functions in embryonic development drove the survival of genes on sex-specific chromosomes in snakes, birds, and mammals
Source: HighWire-hosted journal article supplement (doi:10.1101/gr.268516.120), 2021-01-21
Supplement: Supplemental_Table_S17.xlsx [file Supplemental_Table_S17.xlsx]

## Sheet: Sheet1
Supplemental Table S17. Observed and expected survivors by species and stratum.
Species	Stratum	Size	Obs. Adjacent	Obs. Isolated	Exp. Adjacent	Exp. Isolated	P val	P adj
Thamnophis elegans	Colubroidea Stratum	979	16	25	3	38	0.000624867	0.0668607
Rattus norvegicus	Eutherian S2/S3 Combined	322	6	2	0	8	0.0034965	0.374126
Sistrurus miliarius	Colubroidea Stratum	979	21	42	8	55	0.00515535	0.551623
Cicinnurus regius	Neoaves Stratum 2	239	15	13	6	22	0.01305	1
Gallus gallus	Galliform Stratum 2	302	10	12	3	19	0.0226	1
Equus ferus caballus	Eutherian S2/S3 Combined	322	8	9	2	15	0.0285132	1
Canis lupus familiaris	Eutherian S2/S3 Combined	322	6	5	1	10	0.0317337	1
Felis catus	Eutherian S2/S3 Combined	322	6	5	1	10	0.0317337	1
Mus musculus	Eutherian S2/S3 Combined	322	4	3	0	7	0.034965	1
Corvus brachyrhynchos	Neoaves Stratum 2	239	12	13	5	20	0.03588	1
Parotia lawesii	Neoaves Stratum 2	239	12	13	5	20	0.03588	1
Pseudopodoces humilis	Neoaves Stratum 2	239	12	13	5	20	0.03588	1
Paradisaea raggiana	Neoaves Stratum 2	239	10	11	4	17	0.05006	1
Geospiza fortis	Neoaves Stratum 2	239	10	12	4	18	0.052	1
Paradisaea rubra	Neoaves Stratum 2	239	10	15	4	20	0.06712	1
Cicinnurus magnificus	Neoaves Stratum 2	239	12	15	6	21	0.074	1
Tinamus guttatus	Tinamus Stratum 2	348	25	32	17	40	0.08689	1
Passer domesticus	Neoaves Stratum 2	239	6	9	2	13	0.1074	1
Serinus canaria	Neoaves Stratum 2	239	6	11	2	15	0.1123	1
Sistrurus miliarius	Crotalus-Sisturus-Protobothrops Stratum	214	4	5	1	8	0.147059	1
Bos taurus	Eutherian S2/S3 Combined	322	4	6	1	9	0.151703	1
Gorilla gorilla	Eutherian S2/S3 Combined	322	4	6	1	9	0.151703	1
Homo sapiens	Eutherian S2/S3 Combined	322	4	6	1	9	0.151703	1
Macaca mulatta	Eutherian S2/S3 Combined	322	4	6	1	9	0.151703	1
Ficedula albicollis	Neoaves Stratum 2	239	8	13	4	17	0.1529	1
Sus scrofa	Eutherian S2/S3 Combined	322	4	7	1	10	0.155388	1
Chaetura pelagica	Swift Stratum 3	29	2	0	0	2	0.1667	1
Tinamus guttatus	Tinamide Stratum 1	143	2	3	0	5	0.2222	1
Callithrix jacchus	Eutherian S2/S3 Combined	322	2	4	0	6	0.227273	1
Pan troglodytes	Eutherian S2/S3 Combined	322	2	5	0	7	0.230769	1
Ficedula albicollis	Songbird Stratum 3	38	4	3	2	5	0.296	1
Nipponia nippon	Neoaves Stratum 2	239	8	18	6	22	0.3185	1
Corvus brachyrhynchos	Songbird Stratum 3	38	6	3	4	5	0.3186	1
Deinagkistrodon acutus	Colubroidea Stratum	979	4	26	2	28	0.335374	1
Anas platyrhynchos	Duck Stratum 2	261	2	10	1	11	0.5	1
Charadrius vociferus	Neoaves Stratum 2	239	2	10	1	11	0.5	1
Mesitornis unicolor	Neoaves Stratum 2	239	2	9	1	10	0.5	1
Tyto alba	Neoaves Stratum 2	239	2	9	1	10	0.5	1
Monodelphis domestica	Metherian S2 Combined	183	2	8	0	10	0.5	1
Serinus canaria	Neognathae Stratum 1	214	2	6	1	7	0.5	1
Macropus eugenii	Metherian S2 Combined	183	2	6	1	7	0.5	1
Callithrix jacchus	Marmoset S5	23	2	1	1	2	0.5	1
Macaca mulatta	Catarrhine S5	7	2	0	1	1	0.5	1
Phaethon lepturus	Neoaves Stratum 2	239	6	22	6	22	0.6271	1
Struthio camelus	Ostrich Stratum 1	64	7	9	7	9	0.6388	1
Cicinnurus magnificus	Songbird Stratum 3	38	4	5	4	5	0.6814	1
Cicinnurus magnificus	Neognathae Stratum 1	214	2	13	2	13	0.7011	1
Parotia lawesii	Neognathae Stratum 1	214	2	13	2	13	0.7011	1
Paradisaea raggiana	Neognathae Stratum 1	214	2	12	2	12	0.7022	1
Pseudopodoces humilis	Neognathae Stratum 1	214	2	11	2	11	0.7035	1
Geospiza fortis	Songbird Stratum 3	38	2	5	2	5	0.7203	1
Paradisaea rubra	Songbird Stratum 3	38	2	5	2	5	0.7203	1
Serinus canaria	Songbird Stratum 3	38	2	4	2	4	0.7273	1
Paradisaea raggiana	Songbird Stratum 3	38	4	6	5	5	0.8151	1
Parotia lawesii	Songbird Stratum 3	38	4	6	5	5	0.8151	1
Cicinnurus regius	Neognathae Stratum 1	214	2	15	3	14	0.8324	1
Cicinnurus regius	Songbird Stratum 3	38	2	8	5	5	0.9714	1
Paradisaea rubra	Neognathae Stratum 1	214	0	13	2	11	1	1
Ficedula albicollis	Neognathae Stratum 1	214	0	12	1	11	1	1
Corvus brachyrhynchos	Neognathae Stratum 1	214	0	11	1	10	1	1
Cicinnurus magnificus	Avian Stratum 0	175	0	9	1	8	1	1
Cicinnurus regius	Avian Stratum 0	175	0	9	1	8	1	1
Passer domesticus	Neognathae Stratum 1	214	0	8	1	7	1	1
Macropus eugenii	Therian S1	275	0	7	0	7	1	1
Monodelphis domestica	Therian S1	275	0	7	0	7	1	1
Thamnophis elegans	Colubridae Stratum	195	0	7	0	7	1	1
Parotia lawesii	Avian Stratum 0	175	0	7	1	6	1	1
Geospiza fortis	Neognathae Stratum 1	214	0	6	0	6	1	1
Nipponia nippon	Neognathae Stratum 1	214	0	6	0	6	1	1
Phaethon lepturus	Neognathae Stratum 1	214	0	6	0	6	1	1
Ficedula albicollis	Avian Stratum 0	175	0	6	0	6	1	1
Paradisaea rubra	Avian Stratum 0	175	0	6	0	6	1	1
Equus ferus caballus	Horse S4	15	0	6	4	2	1	1
Meleagris gallopavo	Galliform Stratum 2	302	0	5	0	5	1	1
Gallus gallus	Neognathae Stratum 1	214	0	5	0	5	1	1
Corvus brachyrhynchos	Avian Stratum 0	175	0	5	0	5	1	1
Paradisaea raggiana	Avian Stratum 0	175	0	5	0	5	1	1
Passer domesticus	Songbird Stratum 3	38	0	5	1	4	1	1
Pseudopodoces humilis	Songbird Stratum 3	38	0	5	1	4	1	1
Canis lupus familiaris	Therian S1	275	0	4	0	4	1	1
Equus ferus caballus	Therian S1	275	0	4	0	4	1	1
Felis catus	Therian S1	275	0	4	0	4	1	1
Gorilla gorilla	Therian S1	275	0	4	0	4	1	1
Homo sapiens	Therian S1	275	0	4	0	4	1	1
Macaca mulatta	Therian S1	275	0	4	0	4	1	1
Sus scrofa	Therian S1	275	0	4	0	4	1	1
Anas platyrhynchos	Neognathae Stratum 1	214	0	4	0	4	1	1
Tyto alba	Barn Owl Stratum 3	39	0	4	1	3	1	1
Bos taurus	Therian S1	275	0	3	0	3	1	1
Callithrix jacchus	Therian S1	275	0	3	0	3	1	1
Pan troglodytes	Therian S1	275	0	3	0	3	1	1
Meleagris gallopavo	Neognathae Stratum 1	214	0	3	0	3	1	1
Mesitornis unicolor	Neognathae Stratum 1	214	0	3	0	3	1	1
Tyto alba	Neognathae Stratum 1	214	0	3	0	3	1	1
Geospiza fortis	Avian Stratum 0	175	0	3	0	3	1	1
Passer domesticus	Avian Stratum 0	175	0	3	0	3	1	1
Pseudopodoces humilis	Avian Stratum 0	175	0	3	0	3	1	1
Serinus canaria	Avian Stratum 0	175	0	3	0	3	1	1
Calypte anna	Hummingbird Stratum 3	46	0	3	0	0	1	1
Mus musculus	Therian S1	275	0	2	0	2	1	1
Rattus norvegicus	Therian S1	275	0	2	0	2	1	1
Dromaius novaehollandiae	Avian Stratum 0	175	0	2	0	2	1	1
Phaethon lepturus	Avian Stratum 0	175	0	2	0	2	1	1
Gorilla gorilla	Simian S4	15	0	2	0	2	1	1
Homo sapiens	Simian S4	15	0	2	0	2	1	1
Macaca mulatta	Simian S4	15	0	2	0	2	1	1
Mesitornis unicolor	Mesite Stratum 3	32	2	4	2	4	1	1
Chaetura pelagica	Neoaves Stratum 2	239	0	1	0	1	1	excluded
Anas platyrhynchos	Avian Stratum 0	175	0	1	0	1	1	excluded
Gallus gallus	Avian Stratum 0	175	0	1	0	1	1	excluded
Struthio camelus	Avian Stratum 0	175	0	1	0	1	1	excluded
Tyto alba	Avian Stratum 0	175	0	1	0	1	1	excluded
Thamnophis elegans	Colubridae-Elapidae Stratum	64	0	1	0	1	1	excluded
Sistrurus miliarius	Crotalus-Sisturus Stratum	45	0	1	0	1	1	excluded
Callithrix jacchus	Simian S4	15	0	1	0	1	1	excluded
Pan troglodytes	Simian S4	15	0	1	0	1	1	excluded
Gorilla gorilla	Catarrhine S5	7	0	1	0	1	1	excluded
Homo sapiens	Catarrhine S5	7	0	1	0	1	1	excluded
Pan troglodytes	Catarrhine S5	7	0	1	0	1	1	excluded
Canis lupus familiaris	Carnivore S4	4	0	1	0	1	1	excluded
Felis catus	Carnivore S4	4	0	1	0	1	1	excluded
Calypte anna	Neoaves Stratum 2	239	0	0	0	0	1	excluded
Calypte anna	Neognathae Stratum 1	214	0	0	0	0	1	excluded
Chaetura pelagica	Neognathae Stratum 1	214	0	0	0	0	1	excluded
Charadrius vociferus	Neognathae Stratum 1	214	0	0	0	0	1	excluded
Calypte anna	Avian Stratum 0	175	0	0	0	0	1	excluded
Chaetura pelagica	Avian Stratum 0	175	0	0	0	0	1	excluded
Charadrius vociferus	Avian Stratum 0	175	0	0	0	0	1	excluded
Meleagris gallopavo	Avian Stratum 0	175	0	0	0	0	1	excluded
Mesitornis unicolor	Avian Stratum 0	175	0	0	0	0	1	excluded
Nipponia nippon	Avian Stratum 0	175	0	0	0	0	1	excluded
Tinamus guttatus	Avian Stratum 0	175	0	0	0	0	1	excluded
Dromaius novaehollandiae	Emu Stratum 1	32	0	0	0	0	1	excluded
Charadrius vociferus	Killdeer Stratum 3	19	0	0	0	0	1	excluded
Nipponia nippon	Ibis Stratum 3	13	0	0	0	0	1	excluded
Canis lupus familiaris	Dog OFD1 X transposed region	3	0	0	0	0	1	excluded
Gorilla gorilla	Catarrhine OFD1 X transposed region	3	0	0	0	0	1	excluded
Homo sapiens	Catarrhine OFD1 X transposed region	3	0	0	0	0	1	excluded
Macaca mulatta	Catarrhine OFD1 X transposed region	3	0	0	0	0	1	excluded
Pan troglodytes	Catarrhine OFD1 X transposed region	3	0	0	0	0	1	excluded
Sus scrofa	Pig S4	3	0	0	0	0	1	excluded
Sus scrofa	Pig OFD1 X transposed region	3	0	0	0	0	1	excluded
Callithrix jacchus	Marmoset THOC2 X-transposed region	1	0	0	0	0	1	excluded
Equus ferus caballus	Horse OFD1 X transposed region	1	0	0	0	0	1	excluded
Homo sapiens	Human PCDH11X X-transposed region	1	0	0	0	0	1	excluded
Rattus norvegicus	Rat MED14 X transposed region	1	0	0	0	0	1	excluded
