# Supplementary material for: Dosage-sensitive functions in embryonic development drove the survival of genes on sex-specific chromosomes in snakes, birds, and mammals
Source: HighWire-hosted journal article supplement (doi:10.1101/gr.268516.120), 2021-01-21
Supplement: Supplemental_Table_S18.xlsx [file Supplemental_Table_S18.xlsx]

## Sheet: Sheet1
Supplemental Table S18. Branch length and survival fraction calculations from three caenophidian species.
		Deinagkistrodon acutus to Deinagkistrodon-Sistrurus ancestor	Sistrurus miliarius to Deinagkistrodon-Sistrurus ancestor	Deinagkistrodon-Sistrurus ancestor to Deinagkistrodon-Thamnophis ancestor	Thamnophis elegans to Deinagkistrodon-Thamnophis ancestor
	Divergence (MY)	39	39	22.7	61.7
Strata	Branch Length (MY)	Deinagkistrodon acutus to Deinagkistrodon-Sistrurus ancestor	Sistrurus miliarius to Deinagkistrodon-Sistrurus ancestor	Deinagkistrodon-Sistrurus ancestor to Deinagkistrodon-Thamnophis ancestor	Thamnophis elegans to Deinagkistrodon-Thamnophis ancestor
Colubroidea Stratum	162.4	39	39	22.7	61.7
Crotalus-Sisturus-Protobothrops	29.5	0	29.5	0	0
Colubridae-Elapidae	51	0	0	0	51
Colubridae	48	0	0	0	48
Crotalus-Sisturus	12.5	0	12.5	0	0
Number	Genes	Deinagkistrodon acutus to Deinagkistrodon-Sistrurus ancestor	Sistrurus miliarius to Deinagkistrodon-Sistrurus ancestor	Deinagkistrodon-Sistrurus ancestor to Deinagkistrodon-Thamnophis ancestor	Thamnophis elegans to Deinagkistrodon-Thamnophis ancestor	Branch Length	Strata	Max Branch Length	Survival Fraction
30001	ZNF282	0	0	0	0	0	Colubroidea Stratum	162.4	0
30002	ZNF398	0	0	0	0	0	Colubroidea Stratum	162.4	0
30003	TSNARE1	0	0	0	0	0	Colubroidea Stratum	162.4	0
30004	CAMP	0	0	0	61.7	61.7	Colubroidea Stratum	162.4	0.379926
30005	KLHL18	0	0	0	0	0	Colubroidea Stratum	162.4	0
30006	KIF9	0	0	0	0	0	Colubroidea Stratum	162.4	0
30007	SETD2	0	0	0	0	0	Colubroidea Stratum	162.4	0
30008	TNFRSF14	0	0	0	0	0	Colubroidea Stratum	162.4	0
30009	CHDSD	0	0	0	0	0	Colubroidea Stratum	162.4	0
30010	NBEAL2	0	0	0	0	0	Colubroidea Stratum	162.4	0
30011	PTH1R	0	0	0	0	0	Colubroidea Stratum	162.4	0
30012	FBXO41	0	0	0	0	0	Colubroidea Stratum	162.4	0
30013	CCT7	0	0	0	0	0	Colubroidea Stratum	162.4	0
30014	PRADC1	0	0	0	0	0	Colubroidea Stratum	162.4	0
30015	SMYD5	0	0	0	0	0	Colubroidea Stratum	162.4	0
30016	VPS16	0	0	0	0	0	Colubroidea Stratum	162.4	0
30017	PCED1A	0	0	0	0	0	Colubroidea Stratum	162.4	0
30018	CPXM1	0	0	0	0	0	Colubroidea Stratum	162.4	0
30019	NAT8B	0	0	0	0	0	Colubroidea Stratum	162.4	0
30020	NAT8	0	0	0	0	0	Colubroidea Stratum	162.4	0
30021	EBF3	0	0	0	0	0	Colubroidea Stratum	162.4	0
30022	EBF4	0	0	0	0	0	Colubroidea Stratum	162.4	0
30023	RNF145	0	0	0	0	0	Colubroidea Stratum	162.4	0
30024	TMIE	0	0	0	0	0	Colubroidea Stratum	162.4	0
30025	ALS2CL	0	0	0	0	0	Colubroidea Stratum	162.4	0
30026	CCDC12	0	0	0	0	0	Colubroidea Stratum	162.4	0
30027	JMJD4	0	0	0	0	0	Colubroidea Stratum	162.4	0
30028	SNAP47	0	0	0	0	0	Colubroidea Stratum	162.4	0
30029	WNT9A	0	0	0	0	0	Colubroidea Stratum	162.4	0
30030	WNT3A	0	0	0	0	0	Colubroidea Stratum	162.4	0
30031	C1orf35	0	0	0	0	0	Colubroidea Stratum	162.4	0
30032	GJC2	0	0	0	0	0	Colubroidea Stratum	162.4	0
30033	IBA57	0	0	0	0	0	Colubroidea Stratum	162.4	0
30034	GUK1	0	0	0	0	0	Colubroidea Stratum	162.4	0
30035	MRPL55	0	0	0	0	0	Colubroidea Stratum	162.4	0
30036	ARF1	0	39	22.7	0	61.7	Colubroidea Stratum	162.4	0.379926
30037	OBSCN	0	0	0	0	0	Colubroidea Stratum	162.4	0
30038	CYP8B1	0	0	0	0	0	Colubroidea Stratum	162.4	0
30039	CCDC13	0	0	0	0	0	Colubroidea Stratum	162.4	0
30040	HHATL	0	0	0	0	0	Colubroidea Stratum	162.4	0
30041	KLHL40	0	0	0	0	0	Colubroidea Stratum	162.4	0
30042	ZBTB47	39	0	22.7	61.7	123.4	Colubroidea Stratum	162.4	0.759852
30043	NKTR	0	0	0	0	0	Colubroidea Stratum	162.4	0
30044	SEC22C	0	0	0	0	0	Colubroidea Stratum	162.4	0
30045	VIPR1	0	0	0	0	0	Colubroidea Stratum	162.4	0
30046	ADCYAP1R1	0	0	0	0	0	Colubroidea Stratum	162.4	0
30047	GHRHR	0	0	0	0	0	Colubroidea Stratum	162.4	0
30048	AQP1	0	0	0	0	0	Colubroidea Stratum	162.4	0
30049	MINDY4	0	0	0	0	0	Colubroidea Stratum	162.4	0
30050	LOC420419	0	0	0	0	0	Colubroidea Stratum	162.4	0
30051	ACAA1	0	0	0	0	0	Colubroidea Stratum	162.4	0
30052	DLEC1	0	0	0	0	0	Colubroidea Stratum	162.4	0
30053	PLCD1	0	0	0	0	0	Colubroidea Stratum	162.4	0
30054	VILL	0	0	0	0	0	Colubroidea Stratum	162.4	0
30055	CTDSPL	0	0	0	0	0	Colubroidea Stratum	162.4	0
30056	GARS1	0	0	0	0	0	Colubroidea Stratum	162.4	0
30057	CRHR2	0	0	0	0	0	Colubroidea Stratum	162.4	0
30058	SLC22A13	0	0	0	0	0	Colubroidea Stratum	162.4	0
30059	MYD88	0	0	0	0	0	Colubroidea Stratum	162.4	0
30060	OXSR1	0	0	0	0	0	Colubroidea Stratum	162.4	0
30061	SLC22A14	0	0	0	0	0	Colubroidea Stratum	162.4	0
30062	SLC22A13	0	0	0	0	0	Colubroidea Stratum	162.4	0
30063	SLC22A13	0	0	0	0	0	Colubroidea Stratum	162.4	0
30064	XIRP1	0	0	0	0	0	Colubroidea Stratum	162.4	0
30065	CSRNP1	0	0	0	0	0	Colubroidea Stratum	162.4	0
30066	TTC21A	0	0	0	0	0	Colubroidea Stratum	162.4	0
30067	GORASP1	0	0	0	61.7	61.7	Colubroidea Stratum	162.4	0.379926
30069	SCN5A	0	0	0	0	0	Colubroidea Stratum	162.4	0
30070	SCN10A	0	0	0	0	0	Colubroidea Stratum	162.4	0
30071	SCN11A	0	0	0	0	0	Colubroidea Stratum	162.4	0
30072	EXOG	0	0	0	0	0	Colubroidea Stratum	162.4	0
30073	ACVR2B	0	0	0	0	0	Colubroidea Stratum	162.4	0
30074	XYLB	0	0	0	0	0	Colubroidea Stratum	162.4	0
30075	C9orf152	0	0	0	0	0	Colubroidea Stratum	162.4	0
30076	NUB1	0	0	0	0	0	Colubroidea Stratum	162.4	0
30077	WDR86	0	0	0	0	0	Colubroidea Stratum	162.4	0
30078	RHEB	0	0	0	0	0	Colubroidea Stratum	162.4	0
30079	PRKAG2	0	0	0	0	0	Colubroidea Stratum	162.4	0
30080	GALNT11	0	0	0	0	0	Colubroidea Stratum	162.4	0
30081	GALNTL5	0	0	0	0	0	Colubroidea Stratum	162.4	0
30082	KMT2C	0	0	0	0	0	Colubroidea Stratum	162.4	0
30083	BAGE2	0	0	0	0	0	Colubroidea Stratum	162.4	0
30084	XRCC2	0	0	0	0	0	Colubroidea Stratum	162.4	0
30085	ACTR3B	0	0	0	0	0	Colubroidea Stratum	162.4	0
30086	ACTR3C	0	0	0	0	0	Colubroidea Stratum	162.4	0
30087	DPP6	0	0	0	0	0	Colubroidea Stratum	162.4	0
30088	PAXIP1	0	0	0	0	0	Colubroidea Stratum	162.4	0
30089	HTR5A	0	0	0	0	0	Colubroidea Stratum	162.4	0
30090	INSIG1	0	0	0	0	0	Colubroidea Stratum	162.4	0
30091	EN2	0	0	0	0	0	Colubroidea Stratum	162.4	0
30092	CNPY1	0	0	0	0	0	Colubroidea Stratum	162.4	0
30093	RBM33	0	39	22.7	61.7	123.4	Colubroidea Stratum	162.4	0.759852
30094	SHH	0	0	0	0	0	Colubroidea Stratum	162.4	0
30095	RNF32	0	0	0	0	0	Colubroidea Stratum	162.4	0
30096	LMBR1	0	0	0	0	0	Colubroidea Stratum	162.4	0
30097	NOM1	0	0	0	0	0	Colubroidea Stratum	162.4	0
30098	MNX1	0	0	0	0	0	Colubroidea Stratum	162.4	0
30099	UBE3C	0	0	0	0	0	Colubroidea Stratum	162.4	0
30100	DNAJB6	0	0	0	61.7	61.7	Colubroidea Stratum	162.4	0.379926
30101	PTPRN2	0	0	0	0	0	Colubroidea Stratum	162.4	0
30102	NCAPG2	0	0	0	0	0	Colubroidea Stratum	162.4	0
30103	ESYT2	0	0	0	0	0	Colubroidea Stratum	162.4	0
30104	DYNC2I1	0	0	0	0	0	Colubroidea Stratum	162.4	0
30105	VIPR2	0	0	0	0	0	Colubroidea Stratum	162.4	0
30106	ZMYND11	0	39	22.7	0	61.7	Colubroidea Stratum	162.4	0.379926
30107	DIP2C	0	0	0	0	0	Colubroidea Stratum	162.4	0
30108	LARP4B	0	39	22.7	0	61.7	Colubroidea Stratum	162.4	0.379926
30109	GTPBP4	0	0	0	0	0	Colubroidea Stratum	162.4	0
30110	IDI1	0	0	0	0	0	Colubroidea Stratum	162.4	0
30111	WDR37	0	0	0	0	0	Colubroidea Stratum	162.4	0
30112	ADARB2	0	0	0	0	0	Colubroidea Stratum	162.4	0
30113	PFKP	0	0	0	0	0	Colubroidea Stratum	162.4	0
30114	PITRM1	0	0	0	0	0	Colubroidea Stratum	162.4	0
30115	KLF6	39	39	22.7	61.7	162.4	Colubroidea Stratum	162.4	1
30116	FZD8	0	0	0	0	0	Colubroidea Stratum	162.4	0
30117	GJD4	0	0	0	0	0	Colubroidea Stratum	162.4	0
30118	CCNY	0	0	0	0	0	Colubroidea Stratum	162.4	0
30119	CREM	0	0	0	0	0	Colubroidea Stratum	162.4	0
30120	CUL2	39	0	22.7	61.7	123.4	Colubroidea Stratum	162.4	0.759852
30121	PARD3	0	0	0	0	0	Colubroidea Stratum	162.4	0
30122	NRP1	0	0	0	0	0	Colubroidea Stratum	162.4	0
30123	ITGB1	0	0	0	0	0	Colubroidea Stratum	162.4	0
30124	CCDC7	0	0	0	0	0	Colubroidea Stratum	162.4	0
30125	EPC1	39	39	22.7	61.7	162.4	Colubroidea Stratum	162.4	1
30126	KIF5B	0	0	0	61.7	61.7	Colubroidea Stratum	162.4	0.379926
30127	ARHGAP12	0	0	0	0	0	Colubroidea Stratum	162.4	0
30128	ZEB1	0	0	0	0	0	Colubroidea Stratum	162.4	0
30129	SVIL	0	0	0	0	0	Colubroidea Stratum	162.4	0
30130	MTPAP	0	0	0	0	0	Colubroidea Stratum	162.4	0
30131	JCAD	0	0	0	0	0	Colubroidea Stratum	162.4	0
30132	MAP3K8	0	0	0	0	0	Colubroidea Stratum	162.4	0
30133	BAMBI	0	0	0	0	0	Colubroidea Stratum	162.4	0
30135	SSNA1	0	0	0	0	0	Colubroidea Stratum	162.4	0
30136	MPP7	0	0	0	0	0	Colubroidea Stratum	162.4	0
30137	ODAD2	0	0	0	0	0	Colubroidea Stratum	162.4	0
30138	MKX	0	0	0	0	0	Colubroidea Stratum	162.4	0
30139	RAB18	0	0	0	0	0	Colubroidea Stratum	162.4	0
30140	PTCHD3	0	0	0	0	0	Colubroidea Stratum	162.4	0
30141	LOC420486	0	0	0	0	0	Colubroidea Stratum	162.4	0
30142	YME1L1	0	0	0	0	0	Colubroidea Stratum	162.4	0
30143	MASTL	0	0	0	0	0	Colubroidea Stratum	162.4	0
30144	ACBD5	0	0	0	0	0	Colubroidea Stratum	162.4	0
30145	ABI1	0	0	0	0	0	Colubroidea Stratum	162.4	0
30146	SELENOO	0	0	0	0	0	Colubroidea Stratum	162.4	0
30147	PDSS1	0	0	0	0	0	Colubroidea Stratum	162.4	0
30148	APBB1IP	0	0	0	0	0	Colubroidea Stratum	162.4	0
30149	DHX8	0	0	0	0	0	Colubroidea Stratum	162.4	0
30150	MLX	0	0	0	0	0	Colubroidea Stratum	162.4	0
30151	PSMC3IP	0	0	0	0	0	Colubroidea Stratum	162.4	0
30152	RETREG3	0	0	0	0	0	Colubroidea Stratum	162.4	0
30153	TUBG1	0	0	0	0	0	Colubroidea Stratum	162.4	0
30154	CCR10	0	0	0	0	0	Colubroidea Stratum	162.4	0
30155	GAD2	0	0	0	0	0	Colubroidea Stratum	162.4	0
30156	MYO3A	0	0	0	0	0	Colubroidea Stratum	162.4	0
30157	GPR158	0	0	0	0	0	Colubroidea Stratum	162.4	0
30158	THNSL1	0	0	0	0	0	Colubroidea Stratum	162.4	0
30159	ENKUR	0	0	0	0	0	Colubroidea Stratum	162.4	0
30160	PRTFDC1	0	0	0	0	0	Colubroidea Stratum	162.4	0
30161	ARHGAP21	0	0	0	0	0	Colubroidea Stratum	162.4	0
30162	EFCAB1	0	0	0	0	0	Colubroidea Stratum	162.4	0
30163	RBM48	0	0	0	0	0	Colubroidea Stratum	162.4	0
30164	PEX1	0	0	0	0	0	Colubroidea Stratum	162.4	0
30165	ACCSL	0	0	0	0	0	Colubroidea Stratum	162.4	0
30166	GATAD1	0	0	0	0	0	Colubroidea Stratum	162.4	0
30167	ANKIB1	0	0	0	0	0	Colubroidea Stratum	162.4	0
30168	KRIT1	0	0	0	0	0	Colubroidea Stratum	162.4	0
30169	LRRD1	0	0	0	0	0	Colubroidea Stratum	162.4	0
30170	CYP51A1	0	0	0	0	0	Colubroidea Stratum	162.4	0
30171	AKAP9	0	0	0	0	0	Colubroidea Stratum	162.4	0
30172	FZD1	0	0	0	0	0	Colubroidea Stratum	162.4	0
30173	CDK14	0	0	0	0	0	Colubroidea Stratum	162.4	0
30174	PTTG1IP	0	0	0	0	0	Colubroidea Stratum	162.4	0
30175	CLDN12	0	0	0	0	0	Colubroidea Stratum	162.4	0
30176	GTPBP10	0	0	0	0	0	Colubroidea Stratum	162.4	0
30177	FAM237B	0	0	0	0	0	Colubroidea Stratum	162.4	0
30178	CFAP69	0	0	0	0	0	Colubroidea Stratum	162.4	0
30179	STEAP2	0	0	0	0	0	Colubroidea Stratum	162.4	0
30180	STEAP1	0	0	0	0	0	Colubroidea Stratum	162.4	0
30181	ZNF804B	0	0	0	0	0	Colubroidea Stratum	162.4	0
30182	STEAP4	0	0	0	0	0	Colubroidea Stratum	162.4	0
30183	SRI	0	0	0	0	0	Colubroidea Stratum	162.4	0
30184	ADAM22	0	0	0	0	0	Colubroidea Stratum	162.4	0
30185	DBF4	0	0	0	0	0	Colubroidea Stratum	162.4	0
30186	SLC25A40	0	0	0	0	0	Colubroidea Stratum	162.4	0
30187	RUNDC3B	0	0	0	0	0	Colubroidea Stratum	162.4	0
30188	ABCB1	0	0	0	0	0	Colubroidea Stratum	162.4	0
30189	CROT	0	0	0	0	0	Colubroidea Stratum	162.4	0
30190	ACBD7	0	0	0	0	0	Colubroidea Stratum	162.4	0
30191	RPP38	0	0	0	0	0	Colubroidea Stratum	162.4	0
30192	NMT2	0	0	0	0	0	Colubroidea Stratum	162.4	0
30193	FAM171A1	0	0	0	0	0	Colubroidea Stratum	162.4	0
30194	ITGA8	0	0	0	0	0	Colubroidea Stratum	162.4	0
30195	MINDY3	0	0	0	0	0	Colubroidea Stratum	162.4	0
30196	PTER	0	0	0	0	0	Colubroidea Stratum	162.4	0
30197	C1QL3	0	0	0	0	0	Colubroidea Stratum	162.4	0
30198	RSU1	0	0	0	0	0	Colubroidea Stratum	162.4	0
30199	CUBN	0	0	0	0	0	Colubroidea Stratum	162.4	0
30200	TRDMT1	0	0	0	0	0	Colubroidea Stratum	162.4	0
30201	VIM	0	0	0	0	0	Colubroidea Stratum	162.4	0
30202	ST8SIA6	0	0	0	0	0	Colubroidea Stratum	162.4	0
30203	HACD1	0	0	0	0	0	Colubroidea Stratum	162.4	0
30204	STAM	0	0	0	0	0	Colubroidea Stratum	162.4	0
30205	MRC1	0	0	0	0	0	Colubroidea Stratum	162.4	0
30206	BLOC1S5	0	0	0	0	0	Colubroidea Stratum	162.4	0
30207	SLC39A12	0	0	0	0	0	Colubroidea Stratum	162.4	0
30208	CACNB2	0	0	0	0	0	Colubroidea Stratum	162.4	0
30209	NSUN6	0	0	0	0	0	Colubroidea Stratum	162.4	0
30210	ARL5B	0	0	0	0	0	Colubroidea Stratum	162.4	0
30211	MALRD1	0	0	0	0	0	Colubroidea Stratum	162.4	0
30212	PLXDC2	0	0	0	0	0	Colubroidea Stratum	162.4	0
30213	CYP8B1	0	0	0	0	0	Colubroidea Stratum	162.4	0
30214	NEBL	0	0	0	0	0	Colubroidea Stratum	162.4	0
30215	SKIDA1	0	0	0	0	0	Colubroidea Stratum	162.4	0
30216	MLLT10	0	0	0	0	0	Colubroidea Stratum	162.4	0
30217	DNAJC1	0	0	0	0	0	Colubroidea Stratum	162.4	0
30219	BMI1	39	39	22.7	61.7	162.4	Colubroidea Stratum	162.4	1
30220	SPAG6	0	0	0	0	0	Colubroidea Stratum	162.4	0
30221	PIP4K2A	0	0	0	0	0	Colubroidea Stratum	162.4	0
30222	ARMC3	0	0	0	0	0	Colubroidea Stratum	162.4	0
30223	MSRB2	0	0	0	0	0	Colubroidea Stratum	162.4	0
30224	PTF1A	39	0	22.7	0	61.7	Colubroidea Stratum	162.4	0.379926
30225	C10orf67	0	0	0	0	0	Colubroidea Stratum	162.4	0
30226	OTUD1	0	0	0	0	0	Colubroidea Stratum	162.4	0
30227	KIAA1217	0	0	0	0	0	Colubroidea Stratum	162.4	0
30228	FAM133B	0	0	0	0	0	Colubroidea Stratum	162.4	0
30229	CDK6	0	0	0	0	0	Colubroidea Stratum	162.4	0
30230	SAMD9	0	0	0	0	0	Colubroidea Stratum	162.4	0
30231	HEPACAM2	0	0	0	0	0	Colubroidea Stratum	162.4	0
30232	VPS50	0	0	0	0	0	Colubroidea Stratum	162.4	0
30233	CALCR	0	0	0	0	0	Colubroidea Stratum	162.4	0
30234	TFPI2	0	0	0	0	0	Colubroidea Stratum	162.4	0
30235	GNG11	0	0	0	0	0	Colubroidea Stratum	162.4	0
30236	COL1A2	0	0	0	0	0	Colubroidea Stratum	162.4	0
30237	CASD1	0	0	0	0	0	Colubroidea Stratum	162.4	0
30238	SGCE	0	0	0	0	0	Colubroidea Stratum	162.4	0
30239	PPP1R9A	0	0	0	0	0	Colubroidea Stratum	162.4	0
30240	PON1	0	0	0	0	0	Colubroidea Stratum	162.4	0
30241	ASB4	0	0	0	0	0	Colubroidea Stratum	162.4	0
30242	PDK4	0	0	0	0	0	Colubroidea Stratum	162.4	0
30243	DYNC1I1	0	0	0	0	0	Colubroidea Stratum	162.4	0
30244	SLC25A13	0	0	0	0	0	Colubroidea Stratum	162.4	0
30245	SEM1	0	0	0	0	0	Colubroidea Stratum	162.4	0
30246	DLX6	0	0	0	0	0	Colubroidea Stratum	162.4	0
30247	DLX5	0	0	0	0	0	Colubroidea Stratum	162.4	0
30248	SDHAF3	0	0	0	0	0	Colubroidea Stratum	162.4	0
30249	TAC1	0	0	0	0	0	Colubroidea Stratum	162.4	0
30250	ASNS	0	0	0	0	0	Colubroidea Stratum	162.4	0
30251	C1GALT1	0	0	0	0	0	Colubroidea Stratum	162.4	0
30252	COL28A1	0	0	0	0	0	Colubroidea Stratum	162.4	0
30253	MIOS	0	0	0	0	0	Colubroidea Stratum	162.4	0
30254	RPA3	0	0	0	0	0	Colubroidea Stratum	162.4	0
30255	UMAD1	0	0	0	0	0	Colubroidea Stratum	162.4	0
30256	GLCCI1	0	0	0	0	0	Colubroidea Stratum	162.4	0
30257	ICA1	0	0	0	0	0	Colubroidea Stratum	162.4	0
30258	NXPH1	0	0	0	0	0	Colubroidea Stratum	162.4	0
30259	PHF14	0	0	0	0	0	Colubroidea Stratum	162.4	0
30260	THSD7A	0	0	0	0	0	Colubroidea Stratum	162.4	0
30261	TMEM106B	0	0	0	0	0	Colubroidea Stratum	162.4	0
30262	SCIN	0	0	0	0	0	Colubroidea Stratum	162.4	0
30263	ARL4A	0	0	0	0	0	Colubroidea Stratum	162.4	0
30264	ETV1	0	0	0	0	0	Colubroidea Stratum	162.4	0
30265	DGKB	0	0	0	0	0	Colubroidea Stratum	162.4	0
30266	AGMO	0	0	0	0	0	Colubroidea Stratum	162.4	0
30267	MEOX2	0	0	0	0	0	Colubroidea Stratum	162.4	0
30268	CRPPA	0	0	0	0	0	Colubroidea Stratum	162.4	0
30269	SOSTDC1	0	0	0	0	0	Colubroidea Stratum	162.4	0
30270	LRRC72	0	0	0	0	0	Colubroidea Stratum	162.4	0
30271	ANKMY2	0	0	0	0	0	Colubroidea Stratum	162.4	0
30272	BZW2	0	0	0	0	0	Colubroidea Stratum	162.4	0
30273	TSPAN13	0	0	0	0	0	Colubroidea Stratum	162.4	0
30274	AGR2	0	0	0	0	0	Colubroidea Stratum	162.4	0
30275	AGR3	0	0	0	0	0	Colubroidea Stratum	162.4	0
30276	AHR	0	0	0	0	0	Colubroidea Stratum	162.4	0
30277	SNX13	0	0	0	0	0	Colubroidea Stratum	162.4	0
30278	HDAC9	0	0	0	0	0	Colubroidea Stratum	162.4	0
30279	TWIST1	0	0	0	0	0	Colubroidea Stratum	162.4	0
30280	FERD3L	0	0	0	0	0	Colubroidea Stratum	162.4	0
30281	POLR1F	0	0	0	0	0	Colubroidea Stratum	162.4	0
30282	TMEM196	0	0	0	0	0	Colubroidea Stratum	162.4	0
30283	MACC1	0	0	0	0	0	Colubroidea Stratum	162.4	0
30284	ITGB8	0	0	0	0	0	Colubroidea Stratum	162.4	0
30285	ABCB5	0	0	0	0	0	Colubroidea Stratum	162.4	0
30286	SP8	0	0	0	0	0	Colubroidea Stratum	162.4	0
30287	KLF17	0	0	0	0	0	Colubroidea Stratum	162.4	0
30288	SP4	39	0	22.7	61.7	123.4	Colubroidea Stratum	162.4	0.759852
30289	DNAH11	0	0	0	0	0	Colubroidea Stratum	162.4	0
30290	CDCA7L	0	0	0	0	0	Colubroidea Stratum	162.4	0
30291	RAPGEF5	0	0	0	0	0	Colubroidea Stratum	162.4	0
30292	IL6	0	0	0	0	0	Colubroidea Stratum	162.4	0
30293	TOMM7	0	0	0	0	0	Colubroidea Stratum	162.4	0
30294	FAM126A	0	0	0	0	0	Colubroidea Stratum	162.4	0
30295	KLHL7	0	0	0	0	0	Colubroidea Stratum	162.4	0
30296	FANCF	0	0	0	0	0	Colubroidea Stratum	162.4	0
30297	NUP42	0	0	0	0	0	Colubroidea Stratum	162.4	0
30298	GPNMB	0	0	0	0	0	Colubroidea Stratum	162.4	0
30299	MALSU1	0	0	0	0	0	Colubroidea Stratum	162.4	0
30300	IGF2BP3	0	0	0	0	0	Colubroidea Stratum	162.4	0
30301	TRA2A	0	39	22.7	0	61.7	Colubroidea Stratum	162.4	0.379926
30302	CCDC126	0	0	0	0	0	Colubroidea Stratum	162.4	0
30303	FAM221A	0	0	0	0	0	Colubroidea Stratum	162.4	0
30304	STK31	0	0	0	0	0	Colubroidea Stratum	162.4	0
30305	NPY	0	0	0	0	0	Colubroidea Stratum	162.4	0
30306	MPP6	0	0	0	0	0	Colubroidea Stratum	162.4	0
30307	GSDME	0	0	0	0	0	Colubroidea Stratum	162.4	0
30308	OSBPL3	0	0	0	0	0	Colubroidea Stratum	162.4	0
30309	CYCS	0	0	0	0	0	Colubroidea Stratum	162.4	0
30310	C7orf31	0	0	0	0	0	Colubroidea Stratum	162.4	0
30311	NPVF	0	0	0	0	0	Colubroidea Stratum	162.4	0
30312	HNRNPA2B1	0	0	0	0	0	Colubroidea Stratum	162.4	0
30313	CBX3	0	0	0	0	0	Colubroidea Stratum	162.4	0
30314	SNX10	0	0	0	0	0	Colubroidea Stratum	162.4	0
30315	SKAP2	0	0	0	0	0	Colubroidea Stratum	162.4	0
30316	HOXA1	0	39	22.7	0	61.7	Colubroidea Stratum	162.4	0.379926
30317	HOXA2	0	0	0	0	0	Colubroidea Stratum	162.4	0
30318	HOXA3	0	0	0	0	0	Colubroidea Stratum	162.4	0
30319	HOXA4	0	0	0	0	0	Colubroidea Stratum	162.4	0
30320	HOXA5	0	0	0	0	0	Colubroidea Stratum	162.4	0
30321	HOXA6	0	0	0	0	0	Colubroidea Stratum	162.4	0
30322	HOXA7	0	0	0	0	0	Colubroidea Stratum	162.4	0
30323	HOXA9	0	0	0	0	0	Colubroidea Stratum	162.4	0
30324	HOXA10	0	0	0	0	0	Colubroidea Stratum	162.4	0
30325	EVX1	0	0	0	0	0	Colubroidea Stratum	162.4	0
30326	HOXA11	0	0	0	0	0	Colubroidea Stratum	162.4	0
30327	HOXA13	0	0	0	0	0	Colubroidea Stratum	162.4	0
30328	HIBADH	0	0	0	0	0	Colubroidea Stratum	162.4	0
30329	TAX1BP1	0	0	0	0	0	Colubroidea Stratum	162.4	0
30330	JAZF1	0	0	0	0	0	Colubroidea Stratum	162.4	0
30331	CREB5	0	0	0	0	0	Colubroidea Stratum	162.4	0
30332	WIPF3	0	0	0	0	0	Colubroidea Stratum	162.4	0
30333	TRIL	0	0	0	0	0	Colubroidea Stratum	162.4	0
30334	CPVL	0	0	0	0	0	Colubroidea Stratum	162.4	0
30335	CHN2	0	0	0	0	0	Colubroidea Stratum	162.4	0
30336	PRR15	0	0	0	0	0	Colubroidea Stratum	162.4	0
30337	SCRN1	0	0	0	0	0	Colubroidea Stratum	162.4	0
30338	FKBP14	0	0	0	0	0	Colubroidea Stratum	162.4	0
30339	PLEKHA8	0	0	0	0	0	Colubroidea Stratum	162.4	0
30340	COLQ	0	0	0	0	0	Colubroidea Stratum	162.4	0
30341	HACL1	0	0	0	0	0	Colubroidea Stratum	162.4	0
30342	BTD	0	0	0	0	0	Colubroidea Stratum	162.4	0
30343	ANKRD28	0	0	0	0	0	Colubroidea Stratum	162.4	0
30344	VMO1	0	0	0	0	0	Colubroidea Stratum	162.4	0
30345	DPH3	0	0	0	0	0	Colubroidea Stratum	162.4	0
30346	OXNAD1	0	0	0	0	0	Colubroidea Stratum	162.4	0
30347	RFTN1	0	0	0	0	0	Colubroidea Stratum	162.4	0
30348	DAZL	0	0	0	0	0	Colubroidea Stratum	162.4	0
30349	PLCL2	0	0	0	0	0	Colubroidea Stratum	162.4	0
30350	TBC1D5	0	0	0	0	0	Colubroidea Stratum	162.4	0
30351	SATB1	0	0	0	0	0	Colubroidea Stratum	162.4	0
30352	KCNH8	0	0	0	0	0	Colubroidea Stratum	162.4	0
30353	EFHB	0	0	0	0	0	Colubroidea Stratum	162.4	0
30355	PP2D1	0	0	0	0	0	Colubroidea Stratum	162.4	0
30356	KAT2B	0	0	0	0	0	Colubroidea Stratum	162.4	0
30357	SGO1	0	0	0	0	0	Colubroidea Stratum	162.4	0
30358	ZNF385D	0	0	0	0	0	Colubroidea Stratum	162.4	0
30359	UBE2E2	0	0	0	0	0	Colubroidea Stratum	162.4	0
30360	UBE2E1	0	39	22.7	0	61.7	Colubroidea Stratum	162.4	0.379926
30361	NKIRAS1	0	0	0	0	0	Colubroidea Stratum	162.4	0
30362	RPL15	0	0	0	0	0	Colubroidea Stratum	162.4	0
30363	NR1D2	0	0	0	0	0	Colubroidea Stratum	162.4	0
30364	THRB	0	0	0	0	0	Colubroidea Stratum	162.4	0
30365	RARB	0	0	0	0	0	Colubroidea Stratum	162.4	0
30366	TOP2B	0	0	0	61.7	61.7	Colubroidea Stratum	162.4	0.379926
30367	NGLY1	0	0	0	0	0	Colubroidea Stratum	162.4	0
30368	OXSM	0	0	0	0	0	Colubroidea Stratum	162.4	0
30369	LRRC3B	0	0	0	0	0	Colubroidea Stratum	162.4	0
30370	NEK10	0	0	0	0	0	Colubroidea Stratum	162.4	0
30371	SLC4A7	0	0	0	0	0	Colubroidea Stratum	162.4	0
30372	EOMES	0	0	0	0	0	Colubroidea Stratum	162.4	0
30373	CMC1	0	0	0	0	0	Colubroidea Stratum	162.4	0
30374	AZI2	0	0	0	0	0	Colubroidea Stratum	162.4	0
30375	ZCWPW2	0	0	0	0	0	Colubroidea Stratum	162.4	0
30376	RTL3	0	0	0	0	0	Colubroidea Stratum	162.4	0
30377	RBMS3	0	0	0	0	0	Colubroidea Stratum	162.4	0
30378	TGFBR2	0	0	0	0	0	Colubroidea Stratum	162.4	0
30379	GADL1	0	0	0	0	0	Colubroidea Stratum	162.4	0
30380	STT3B	39	39	22.7	61.7	162.4	Colubroidea Stratum	162.4	1
30381	DYNC1LI1	0	0	0	0	0	Colubroidea Stratum	162.4	0
30382	OSBPL10	0	0	0	0	0	Colubroidea Stratum	162.4	0
30383	GPD1L	0	0	0	0	0	Colubroidea Stratum	162.4	0
30384	CMTM8	0	0	0	0	0	Colubroidea Stratum	162.4	0
30385	CMTM7	0	0	0	0	0	Colubroidea Stratum	162.4	0
30386	CMTM6	0	0	0	0	0	Colubroidea Stratum	162.4	0
30387	CNOT10	0	0	0	0	0	Colubroidea Stratum	162.4	0
30388	TRIM71	0	0	0	0	0	Colubroidea Stratum	162.4	0
30389	TCAIM	0	0	0	0	0	Colubroidea Stratum	162.4	0
30390	TOPAZ1	0	0	0	0	0	Colubroidea Stratum	162.4	0
30391	ABHD5	0	0	0	0	0	Colubroidea Stratum	162.4	0
30392	ANO10	0	0	0	0	0	Colubroidea Stratum	162.4	0
30393	SNRK	0	39	22.7	0	61.7	Colubroidea Stratum	162.4	0.379926
30394	POMGNT2	0	0	0	0	0	Colubroidea Stratum	162.4	0
30395	RPL14	0	0	0	0	0	Colubroidea Stratum	162.4	0
30396	GASK1A	0	0	0	0	0	Colubroidea Stratum	162.4	0
30397	ENTPD3	0	0	0	0	0	Colubroidea Stratum	162.4	0
30398	GGCT	0	0	0	0	0	Colubroidea Stratum	162.4	0
30399	NOD1	0	0	0	0	0	Colubroidea Stratum	162.4	0
30400	ZNRF2	0	0	0	0	0	Colubroidea Stratum	162.4	0
30401	MTURN	0	0	0	0	0	Colubroidea Stratum	162.4	0
30402	EAF1	0	0	0	0	0	Colubroidea Stratum	162.4	0
30403	METTL6	0	0	0	0	0	Colubroidea Stratum	162.4	0
30404	SH3BP5	0	0	0	0	0	Colubroidea Stratum	162.4	0
30405	CAPN7	0	0	0	0	0	Colubroidea Stratum	162.4	0
30406	COL6A3	0	0	0	0	0	Colubroidea Stratum	162.4	0
30407	COL6A5	0	0	0	0	0	Colubroidea Stratum	162.4	0
30408	COL6A6	0	0	0	0	0	Colubroidea Stratum	162.4	0
30409	COL6A6	0	0	0	0	0	Colubroidea Stratum	162.4	0
30410	PIK3R4	0	0	0	0	0	Colubroidea Stratum	162.4	0
30411	ATP2C1	0	0	0	0	0	Colubroidea Stratum	162.4	0
30412	ASTE1	0	0	0	0	0	Colubroidea Stratum	162.4	0
30413	NEK11	0	0	0	0	0	Colubroidea Stratum	162.4	0
30414	MRPL3	0	0	0	0	0	Colubroidea Stratum	162.4	0
30415	CPNE4	0	0	0	0	0	Colubroidea Stratum	162.4	0
30416	ACP3	0	0	0	0	0	Colubroidea Stratum	162.4	0
30417	DNAJC13	0	0	0	0	0	Colubroidea Stratum	162.4	0
30418	CCR9	0	0	0	0	0	Colubroidea Stratum	162.4	0
30419	ACAD11	0	0	0	0	0	Colubroidea Stratum	162.4	0
30420	UBA5	0	0	0	0	0	Colubroidea Stratum	162.4	0
30421	NPHP3	0	0	0	0	0	Colubroidea Stratum	162.4	0
30422	XCR1	0	0	0	0	0	Colubroidea Stratum	162.4	0
30423	TMEM108	0	0	0	0	0	Colubroidea Stratum	162.4	0
30424	BFSP2	0	0	0	0	0	Colubroidea Stratum	162.4	0
30425	CDV3	0	0	0	0	0	Colubroidea Stratum	162.4	0
30426	TOPBP1	0	0	0	0	0	Colubroidea Stratum	162.4	0
30427	CCRL2	0	0	0	0	0	Colubroidea Stratum	162.4	0
30428	CCR2	0	0	0	0	0	Colubroidea Stratum	162.4	0
30429	CCR5	0	0	0	0	0	Colubroidea Stratum	162.4	0
30430	CCR3	0	0	0	0	0	Colubroidea Stratum	162.4	0
30431	CCR1	0	0	0	0	0	Colubroidea Stratum	162.4	0
30432	CCR8	0	0	0	0	0	Colubroidea Stratum	162.4	0
30433	CXCR6	0	0	0	0	0	Colubroidea Stratum	162.4	0
30434	FYCO1	0	0	0	0	0	Colubroidea Stratum	162.4	0
30435	LZTFL1	0	0	0	0	0	Colubroidea Stratum	162.4	0
30436	SLC6A20	0	0	0	0	0	Colubroidea Stratum	162.4	0
30437	SNRPD1	0	0	0	0	0	Colubroidea Stratum	162.4	0
30438	SACM1L	0	0	0	0	0	Colubroidea Stratum	162.4	0
30439	LIMD1	0	0	0	0	0	Colubroidea Stratum	162.4	0
30440	LARS2	0	0	0	0	0	Colubroidea Stratum	162.4	0
30441	TMEM158	0	0	0	0	0	Colubroidea Stratum	162.4	0
30442	CDCP1	0	0	0	0	0	Colubroidea Stratum	162.4	0
30443	CLEC3B	0	0	0	0	0	Colubroidea Stratum	162.4	0
30444	EXOSC7	0	0	0	0	0	Colubroidea Stratum	162.4	0
30445	ZDHHC3	0	0	0	0	0	Colubroidea Stratum	162.4	0
30446	TGM4	0	0	0	0	0	Colubroidea Stratum	162.4	0
30447	KIF15	0	0	0	0	0	Colubroidea Stratum	162.4	0
30448	KIAA1143	0	0	0	0	0	Colubroidea Stratum	162.4	0
30450	ULK4	0	0	0	0	0	Colubroidea Stratum	162.4	0
30451	TRAK1	0	0	0	0	0	Colubroidea Stratum	162.4	0
30452	CCK	0	0	0	0	0	Colubroidea Stratum	162.4	0
30453	EIF1B	0	0	0	0	0	Colubroidea Stratum	162.4	0
30454	PRLH	0	0	0	0	0	Colubroidea Stratum	162.4	0
30455	MYRIP	0	0	0	0	0	Colubroidea Stratum	162.4	0
30456	TMC2	0	0	0	0	0	Colubroidea Stratum	162.4	0
30457	RPSA	0	0	0	0	0	Colubroidea Stratum	162.4	0
30458	SLC25A38	0	0	0	0	0	Colubroidea Stratum	162.4	0
30459	CASP14	0	0	0	0	0	Colubroidea Stratum	162.4	0
30460	CX3CR1	0	0	0	0	0	Colubroidea Stratum	162.4	0
30461	CCR4	0	0	0	0	0	Colubroidea Stratum	162.4	0
30462	ACKR2	0	0	0	0	0	Colubroidea Stratum	162.4	0
30463	GLB1	0	0	0	0	0	Colubroidea Stratum	162.4	0
30464	TMPPE	0	0	0	0	0	Colubroidea Stratum	162.4	0
30465	CRTAP	0	0	0	0	0	Colubroidea Stratum	162.4	0
30466	SUSD5	0	0	0	0	0	Colubroidea Stratum	162.4	0
30467	UBP1	0	0	0	0	0	Colubroidea Stratum	162.4	0
30468	CLASP2	0	0	0	0	0	Colubroidea Stratum	162.4	0
30469	PDCD6IP	0	0	0	0	0	Colubroidea Stratum	162.4	0
30470	ARPP21	0	0	0	0	0	Colubroidea Stratum	162.4	0
30471	STAC	0	0	0	0	0	Colubroidea Stratum	162.4	0
30472	DCLK3	0	0	0	0	0	Colubroidea Stratum	162.4	0
30473	TRANK1	0	0	0	0	0	Colubroidea Stratum	162.4	0
30474	MLH1	0	0	0	0	0	Colubroidea Stratum	162.4	0
30475	LRRFIP2	0	0	0	0	0	Colubroidea Stratum	162.4	0
30476	GOLGA4	0	0	0	0	0	Colubroidea Stratum	162.4	0
30477	ITGA9	0	0	0	0	0	Colubroidea Stratum	162.4	0
30478	NEUROD6	0	0	0	0	0	Colubroidea Stratum	162.4	0
30479	ITPRID1	0	0	0	0	0	Colubroidea Stratum	162.4	0
30480	PPP1R17	0	0	0	0	0	Colubroidea Stratum	162.4	0
30481	PDE1C	0	0	0	0	0	Colubroidea Stratum	162.4	0
30482	LSM5	0	0	0	0	0	Colubroidea Stratum	162.4	0
30483	AVL9	0	0	0	0	0	Colubroidea Stratum	162.4	0
30484	KBTBD2	0	0	0	0	0	Colubroidea Stratum	162.4	0
30485	LOC420748	0	0	0	0	0	Colubroidea Stratum	162.4	0
30486	RP9	0	0	0	0	0	Colubroidea Stratum	162.4	0
30487	FKBP9	0	0	0	0	0	Colubroidea Stratum	162.4	0
30488	NT5C3A	0	0	0	0	0	Colubroidea Stratum	162.4	0
30489	BBS9	0	0	0	0	0	Colubroidea Stratum	162.4	0
30490	BMPER	0	0	0	0	0	Colubroidea Stratum	162.4	0
30491	FANCD2OS	0	0	0	0	0	Colubroidea Stratum	162.4	0
30492	NPSR1	0	0	0	0	0	Colubroidea Stratum	162.4	0
30493	DPY19L1	0	0	0	0	0	Colubroidea Stratum	162.4	0
30494	TBX20	0	0	0	0	0	Colubroidea Stratum	162.4	0
30495	HERPUD2	0	0	0	0	0	Colubroidea Stratum	162.4	0
30496	SEPTIN7	0	39	22.7	0	61.7	Colubroidea Stratum	162.4	0.379926
30497	EEPD1	0	0	0	0	0	Colubroidea Stratum	162.4	0
30498	KIAA0895	0	0	0	0	0	Colubroidea Stratum	162.4	0
30499	ANLN	0	0	0	0	0	Colubroidea Stratum	162.4	0
30500	AOAH	0	0	0	0	0	Colubroidea Stratum	162.4	0
30501	ELMO1	0	0	0	0	0	Colubroidea Stratum	162.4	0
30502	GPR141	0	0	0	0	0	Colubroidea Stratum	162.4	0
30503	NME8	0	0	0	0	0	Colubroidea Stratum	162.4	0
30504	SFRP4	0	0	0	0	0	Colubroidea Stratum	162.4	0
30505	EPDR1	0	0	0	0	0	Colubroidea Stratum	162.4	0
30506	STARD3NL	0	0	0	0	0	Colubroidea Stratum	162.4	0
30507	AMPH	0	0	0	0	0	Colubroidea Stratum	162.4	0
30508	VPS41	0	0	0	0	0	Colubroidea Stratum	162.4	0
30509	LOC420562	0	0	0	0	0	Colubroidea Stratum	162.4	0
30510	BET1	0	0	0	0	0	Colubroidea Stratum	162.4	0
30511	POU6F2	0	0	0	0	0	Colubroidea Stratum	162.4	0
30512	YAE1	0	0	0	0	0	Colubroidea Stratum	162.4	0
30513	RALA	0	0	0	0	0	Colubroidea Stratum	162.4	0
30514	CDK13	39	0	22.7	61.7	123.4	Colubroidea Stratum	162.4	0.759852
30515	MPLKIP	0	0	0	0	0	Colubroidea Stratum	162.4	0
30516	SUGCT	0	0	0	0	0	Colubroidea Stratum	162.4	0
30517	INHBA	0	0	0	0	0	Colubroidea Stratum	162.4	0
30518	GLI3	0	0	0	0	0	Colubroidea Stratum	162.4	0
30519	C7orf25	0	0	0	0	0	Colubroidea Stratum	162.4	0
30520	PSMA2	0	39	22.7	0	61.7	Colubroidea Stratum	162.4	0.379926
30521	MRPL32	0	0	0	0	0	Colubroidea Stratum	162.4	0
30522	HECW1	0	0	0	0	0	Colubroidea Stratum	162.4	0
30523	STK17A	0	0	0	0	0	Colubroidea Stratum	162.4	0
30524	COA1	0	0	0	0	0	Colubroidea Stratum	162.4	0
30525	FIGNL1	0	0	0	0	0	Colubroidea Stratum	162.4	0
30526	BLVRA	0	0	0	0	0	Colubroidea Stratum	162.4	0
30527	VOPP1	0	0	0	0	0	Colubroidea Stratum	162.4	0
30528	LANCL2	0	0	0	0	0	Colubroidea Stratum	162.4	0
30529	EGFR	0	0	0	0	0	Colubroidea Stratum	162.4	0
30530	TCHH	0	0	0	0	0	Colubroidea Stratum	162.4	0
30531	SEC61G	0	0	0	0	0	Colubroidea Stratum	162.4	0
30532	TPK1	0	0	0	0	0	Colubroidea Stratum	162.4	0
30533	CNTNAP2	0	0	0	0	0	Colubroidea Stratum	162.4	0
30534	CUL1	0	0	0	0	0	Colubroidea Stratum	162.4	0
30535	EZH2	0	39	22.7	61.7	123.4	Colubroidea Stratum	162.4	0.759852
30536	PDIA4	0	0	0	0	0	Colubroidea Stratum	162.4	0
30537	GLRX5	0	0	0	0	0	Colubroidea Stratum	162.4	0
30538	CHST14	0	0	0	0	0	Colubroidea Stratum	162.4	0
30539	PIGA	0	0	0	0	0	Colubroidea Stratum	162.4	0
30540	RAMP3	0	0	0	0	0	Colubroidea Stratum	162.4	0
30541	ADCY1	0	0	0	0	0	Colubroidea Stratum	162.4	0
30542	IGFBP1	0	0	0	0	0	Colubroidea Stratum	162.4	0
30543	IGFBP3	0	0	0	0	0	Colubroidea Stratum	162.4	0
30544	TNS3	0	0	0	0	0	Colubroidea Stratum	162.4	0
30545	HUS1	0	0	0	0	0	Colubroidea Stratum	162.4	0
30546	SUN3	0	0	0	0	0	Colubroidea Stratum	162.4	0
30547	UPP1	0	0	0	0	0	Colubroidea Stratum	162.4	0
30548	C7orf57	0	0	0	0	0	Colubroidea Stratum	162.4	0
30549	VWC2	0	0	0	0	0	Colubroidea Stratum	162.4	0
30550	ZPBP	0	0	0	0	0	Colubroidea Stratum	162.4	0
30551	SPATA48	0	0	0	0	0	Colubroidea Stratum	162.4	0
30552	IKZF1	0	0	0	0	0	Colubroidea Stratum	162.4	0
30553	DDC	0	0	0	0	0	Colubroidea Stratum	162.4	0
30554	GRB10	0	0	0	0	0	Colubroidea Stratum	162.4	0
30555	COBL	0	0	0	0	0	Colubroidea Stratum	162.4	0
30556	EXOC3	0	0	0	0	0	Colubroidea Stratum	162.4	0
30557	PDCD6	0	0	0	0	0	Colubroidea Stratum	162.4	0
30558	MSANTD3	0	0	0	0	0	Colubroidea Stratum	162.4	0
30559	TEX10	0	0	0	0	0	Colubroidea Stratum	162.4	0
30560	INVS	0	0	0	0	0	Colubroidea Stratum	162.4	0
30561	ERP44	0	0	0	0	0	Colubroidea Stratum	162.4	0
30562	NR4A3	0	0	0	0	0	Colubroidea Stratum	162.4	0
30563	TOX4	0	0	0	0	0	Colubroidea Stratum	162.4	0
30564	CHD8	0	0	0	0	0	Colubroidea Stratum	162.4	0
30565	SUPT16H	0	0	0	0	0	Colubroidea Stratum	162.4	0
30566	RPGRIP1	0	0	0	0	0	Colubroidea Stratum	162.4	0
30567	SEC61B	0	0	0	0	0	Colubroidea Stratum	162.4	0
30568	ALG2	0	0	0	0	0	Colubroidea Stratum	162.4	0
30569	TPPP	0	0	0	0	0	Colubroidea Stratum	162.4	0
30570	BRD9	0	0	0	0	0	Colubroidea Stratum	162.4	0
30571	TRIP13	0	0	0	0	0	Colubroidea Stratum	162.4	0
30572	TGFBR1	0	0	0	0	0	Colubroidea Stratum	162.4	0
30573	RECK	0	0	0	0	0	Colubroidea Stratum	162.4	0
30574	LOC425470	0	0	0	0	0	Colubroidea Stratum	162.4	0
30575	GLIPR2	0	0	0	0	0	Colubroidea Stratum	162.4	0
30576	LRRC36	0	0	0	0	0	Colubroidea Stratum	162.4	0
30577	CEP72	0	0	0	0	0	Colubroidea Stratum	162.4	0
30578	SLC9A3	0	0	0	0	0	Colubroidea Stratum	162.4	0
30579	TMEM245	0	0	0	0	0	Colubroidea Stratum	162.4	0
30580	FRRS1L	0	0	0	0	0	Colubroidea Stratum	162.4	0
30581	MOCOS	0	0	0	0	0	Colubroidea Stratum	162.4	0
30582	ZNF830	0	0	0	0	0	Colubroidea Stratum	162.4	0
30583	BAG1	0	0	0	0	0	Colubroidea Stratum	162.4	0
30584	CHMP5	0	0	0	0	0	Colubroidea Stratum	162.4	0
30585	FH	0	0	0	0	0	Colubroidea Stratum	162.4	0
30586	SDHA	0	0	0	0	0	Colubroidea Stratum	162.4	0
30587	CCDC127	0	0	0	0	0	Colubroidea Stratum	162.4	0
30588	INO80C	0	0	0	0	0	Colubroidea Stratum	162.4	0
30589	GALNT1	0	0	0	0	0	Colubroidea Stratum	162.4	0
30590	C18orf21	0	0	0	0	0	Colubroidea Stratum	162.4	0
30591	RPRD1A	0	0	0	0	0	Colubroidea Stratum	162.4	0
30592	FHOD3	0	0	0	0	0	Colubroidea Stratum	162.4	0
30593	VSTM2A	0	0	0	0	0	Colubroidea Stratum	162.4	0
30594	TECRL	0	0	0	0	0	Colubroidea Stratum	162.4	0
30595	EPHA5	0	0	0	0	0	Colubroidea Stratum	162.4	0
30596	CENPC	0	0	0	0	0	Colubroidea Stratum	162.4	0
30597	UBA6	0	0	0	0	0	Colubroidea Stratum	162.4	0
30598	TMPRSS11B	0	0	0	0	0	Colubroidea Stratum	162.4	0
30599	TMPRSS11A	0	0	0	0	0	Colubroidea Stratum	162.4	0
30600	TMPRSS11D	0	0	0	0	0	Colubroidea Stratum	162.4	0
30601	TMPRSS11E	0	0	0	0	0	Colubroidea Stratum	162.4	0
30602	TMPRSS11F	0	0	0	0	0	Colubroidea Stratum	162.4	0
30603	SLC20A2	0	0	0	0	0	Colubroidea Stratum	162.4	0
30604	CNTNAP1	0	0	0	61.7	61.7	Colubroidea Stratum	162.4	0.379926
30605	EZH1	39	0	22.7	61.7	123.4	Colubroidea Stratum	162.4	0.759852
30606	RAMP2	0	0	0	0	0	Colubroidea Stratum	162.4	0
30607	MUC3B	0	0	0	0	0	Colubroidea Stratum	162.4	0
30608	VPS25	0	0	0	0	0	Colubroidea Stratum	162.4	0
30609	WNK4	0	0	0	0	0	Colubroidea Stratum	162.4	0
30610	CNTD1	0	0	0	0	0	Colubroidea Stratum	162.4	0
30611	BECN1	0	0	0	0	0	Colubroidea Stratum	162.4	0
30612	PSME3	39	39	22.7	0	100.7	Colubroidea Stratum	162.4	0.620074
30613	AOC2	0	0	0	0	0	Colubroidea Stratum	162.4	0
30614	AOC3	0	0	0	0	0	Colubroidea Stratum	162.4	0
30615	G6PC	0	0	0	0	0	Colubroidea Stratum	162.4	0
30616	AARSD1	0	0	0	0	0	Colubroidea Stratum	162.4	0
30617	PTGES3L	0	0	0	0	0	Colubroidea Stratum	162.4	0
30618	RUNDC1	0	0	0	0	0	Colubroidea Stratum	162.4	0
30619	RPL27	0	0	0	0	0	Colubroidea Stratum	162.4	0
30620	IFI35	0	0	0	0	0	Colubroidea Stratum	162.4	0
30621	VAT1	0	0	0	0	0	Colubroidea Stratum	162.4	0
30622	RND2	0	0	0	0	0	Colubroidea Stratum	162.4	0
30623	BRCA1	0	39	22.7	0	61.7	Colubroidea Stratum	162.4	0.379926
30624	NBR1	0	0	0	0	0	Colubroidea Stratum	162.4	0
30625	TMEM106A	0	0	0	0	0	Colubroidea Stratum	162.4	0
30626	ARL4D	0	0	0	0	0	Colubroidea Stratum	162.4	0
30627	PCGF2	0	0	0	0	0	Colubroidea Stratum	162.4	0
30628	PSMB3	0	0	0	0	0	Colubroidea Stratum	162.4	0
30629	PIP4K2B	0	39	22.7	0	61.7	Colubroidea Stratum	162.4	0.379926
30630	CWC25	0	0	0	0	0	Colubroidea Stratum	162.4	0
30631	C17orf98	0	0	0	0	0	Colubroidea Stratum	162.4	0
30632	RPL23	0	0	0	0	0	Colubroidea Stratum	162.4	0
30633	TMEM98	0	0	0	0	0	Colubroidea Stratum	162.4	0
30634	ARHGAP27	0	0	0	0	0	Colubroidea Stratum	162.4	0
30635	PLEKHM1	0	0	0	0	0	Colubroidea Stratum	162.4	0
30636	CD79B	0	0	0	0	0	Colubroidea Stratum	162.4	0
30637	MRC2	0	0	0	0	0	Colubroidea Stratum	162.4	0
30638	MARCHF10	0	0	0	0	0	Colubroidea Stratum	162.4	0
30639	TANC2	0	0	0	0	0	Colubroidea Stratum	162.4	0
30640	ACE	0	0	0	0	0	Colubroidea Stratum	162.4	0
30641	KCNH6	0	0	0	0	0	Colubroidea Stratum	162.4	0
30642	DCAF7	0	0	0	61.7	61.7	Colubroidea Stratum	162.4	0.379926
30643	MAP3K3	0	0	0	0	0	Colubroidea Stratum	162.4	0
30644	LIMD2	0	0	0	0	0	Colubroidea Stratum	162.4	0
30645	RNF113A	0	0	0	0	0	Colubroidea Stratum	162.4	0
30646	STRADA	0	0	0	0	0	Colubroidea Stratum	162.4	0
30647	POLR1A	0	0	0	0	0	Colubroidea Stratum	162.4	0
30648	PTCD3	0	0	0	0	0	Colubroidea Stratum	162.4	0
30649	IMMT	0	0	0	0	0	Colubroidea Stratum	162.4	0
30650	MRPL35	0	0	0	0	0	Colubroidea Stratum	162.4	0
30651	REEP1	0	0	0	0	0	Colubroidea Stratum	162.4	0
30652	CHMP3	0	0	0	0	0	Colubroidea Stratum	162.4	0
30653	RNF103	0	0	0	0	0	Colubroidea Stratum	162.4	0
30654	RMND5A	0	0	0	0	0	Colubroidea Stratum	162.4	0
30655	CD8A	0	0	0	0	0	Colubroidea Stratum	162.4	0
30656	ZMAT1	0	0	0	0	0	Colubroidea Stratum	162.4	0
30657	KRCC1	0	0	0	0	0	Colubroidea Stratum	162.4	0
30658	AREG	0	0	0	0	0	Colubroidea Stratum	162.4	0
30659	EREG	0	0	0	0	0	Colubroidea Stratum	162.4	0
30660	EPGN	0	0	0	0	0	Colubroidea Stratum	162.4	0
30661	MTHFD2L	0	0	0	0	0	Colubroidea Stratum	162.4	0
30662	CXCL8	0	0	0	0	0	Colubroidea Stratum	162.4	0
30663	ANKRD17	0	0	0	0	0	Colubroidea Stratum	162.4	0
30664	COX18	0	0	0	0	0	Colubroidea Stratum	162.4	0
30665	RPIA	0	0	0	0	0	Colubroidea Stratum	162.4	0
30666	EIF2AK3	0	0	0	0	0	Colubroidea Stratum	162.4	0
30667	FOXI3	0	0	0	0	0	Colubroidea Stratum	162.4	0
30668	THNSL2	0	0	0	0	0	Colubroidea Stratum	162.4	0
30669	FABP1	0	0	0	0	0	Colubroidea Stratum	162.4	0
30670	SMYD1	0	0	0	0	0	Colubroidea Stratum	162.4	0
30671	BTC	0	0	0	0	0	Colubroidea Stratum	162.4	0
30672	PARM1	0	0	0	0	0	Colubroidea Stratum	162.4	0
30673	CDKL2	0	0	0	0	0	Colubroidea Stratum	162.4	0
30674	G3BP2	0	0	0	0	0	Colubroidea Stratum	162.4	0
30675	USO1	0	0	0	0	0	Colubroidea Stratum	162.4	0
30676	SH2D4A	0	0	0	0	0	Colubroidea Stratum	162.4	0
30677	CSGALNACT1	0	0	0	0	0	Colubroidea Stratum	162.4	0
30678	INTS10	0	0	0	0	0	Colubroidea Stratum	162.4	0
30679	HGSNAT	0	0	0	0	0	Colubroidea Stratum	162.4	0
30680	POMK	0	0	0	0	0	Colubroidea Stratum	162.4	0
30681	GH1	0	0	0	0	0	Colubroidea Stratum	162.4	0
30682	SCN4A	0	0	0	0	0	Colubroidea Stratum	162.4	0
30683	ADAM11	0	0	0	0	0	Colubroidea Stratum	162.4	0
30684	DBF4B	0	0	0	0	0	Colubroidea Stratum	162.4	0
30685	MEIOC	0	0	0	0	0	Colubroidea Stratum	162.4	0
30686	CCDC43	0	0	0	0	0	Colubroidea Stratum	162.4	0
30687	FZD2	0	0	0	0	0	Colubroidea Stratum	162.4	0
30688	GPATCH8	0	0	0	0	0	Colubroidea Stratum	162.4	0
30689	ITGA2B	0	0	0	0	0	Colubroidea Stratum	162.4	0
30690	FAM171A2	0	39	22.7	0	61.7	Colubroidea Stratum	162.4	0.379926
30691	GRN	0	0	0	0	0	Colubroidea Stratum	162.4	0
30692	GJC1	0	0	0	0	0	Colubroidea Stratum	162.4	0
30693	EFTUD2	0	0	0	0	0	Colubroidea Stratum	162.4	0
30694	CCDC103	0	0	0	0	0	Colubroidea Stratum	162.4	0
30695	FAM187A	0	0	0	0	0	Colubroidea Stratum	162.4	0
30696	GFAP	0	0	0	0	0	Colubroidea Stratum	162.4	0
30697	KIF18B	0	0	0	0	0	Colubroidea Stratum	162.4	0
30698	C1QL1	0	0	0	0	0	Colubroidea Stratum	162.4	0
30699	NMT1	39	39	22.7	0	100.7	Colubroidea Stratum	162.4	0.620074
30700	DCAKD	0	0	0	0	0	Colubroidea Stratum	162.4	0
30701	PLCD3	0	0	0	0	0	Colubroidea Stratum	162.4	0
30702	ACBD4	0	0	0	0	0	Colubroidea Stratum	162.4	0
30703	HEXIM1	0	39	22.7	0	61.7	Colubroidea Stratum	162.4	0.379926
30704	HEXIM2	0	0	0	0	0	Colubroidea Stratum	162.4	0
30705	CDK5R1	0	0	0	0	0	Colubroidea Stratum	162.4	0
30706	MYO1D	0	0	0	0	0	Colubroidea Stratum	162.4	0
30707	MAP3K14	0	0	0	0	0	Colubroidea Stratum	162.4	0
30708	FMNL1	0	0	0	0	0	Colubroidea Stratum	162.4	0
30709	PSMD11	39	39	22.7	61.7	162.4	Colubroidea Stratum	162.4	1
30710	NSF	0	39	22.7	0	61.7	Colubroidea Stratum	162.4	0.379926
30711	WNT3	0	0	0	0	0	Colubroidea Stratum	162.4	0
30712	WNT9B	0	0	0	0	0	Colubroidea Stratum	162.4	0
30713	GOSR2	0	0	0	0	0	Colubroidea Stratum	162.4	0
30714	LARP6L	0	0	0	0	0	Colubroidea Stratum	162.4	0
30715	RPRML	0	0	0	0	0	Colubroidea Stratum	162.4	0
30716	ITGB3	0	0	0	0	0	Colubroidea Stratum	162.4	0
30717	EFCAB13	0	0	0	0	0	Colubroidea Stratum	162.4	0
30718	EFCAB3	0	0	0	0	0	Colubroidea Stratum	162.4	0
30719	METTL2A	0	0	0	0	0	Colubroidea Stratum	162.4	0
30720	TLK2	0	39	22.7	61.7	123.4	Colubroidea Stratum	162.4	0.759852
30721	METTL16	0	0	0	0	0	Colubroidea Stratum	162.4	0
30722	ZNF385C	0	0	0	0	0	Colubroidea Stratum	162.4	0
30723	NKIRAS2	0	0	0	0	0	Colubroidea Stratum	162.4	0
30724	DNAJC7	0	0	0	0	0	Colubroidea Stratum	162.4	0
30725	CNP	0	0	0	0	0	Colubroidea Stratum	162.4	0
30726	ODAD4	0	0	0	0	0	Colubroidea Stratum	162.4	0
30727	ACLY	0	0	0	0	0	Colubroidea Stratum	162.4	0
30728	KLHL11	0	0	0	0	0	Colubroidea Stratum	162.4	0
30729	NT5C3B	0	0	0	0	0	Colubroidea Stratum	162.4	0
30730	FKBP10	0	0	0	0	0	Colubroidea Stratum	162.4	0
30731	ATXN7L3	0	0	0	0	0	Colubroidea Stratum	162.4	0
30732	TMUB2	0	0	0	0	0	Colubroidea Stratum	162.4	0
30733	ASB16	0	0	0	0	0	Colubroidea Stratum	162.4	0
30734	HROB	0	0	0	0	0	Colubroidea Stratum	162.4	0
30735	UBTF	0	39	22.7	0	61.7	Colubroidea Stratum	162.4	0.379926
30736	SLC4A1	0	0	0	0	0	Colubroidea Stratum	162.4	0
30737	RUNDC3A	39	39	22.7	0	100.7	Colubroidea Stratum	162.4	0.620074
30738	SLC25A39	0	39	22.7	0	61.7	Colubroidea Stratum	162.4	0.379926
30739	MAPT	0	0	0	61.7	61.7	Colubroidea Stratum	162.4	0.379926
30740	KANSL1	39	39	22.7	61.7	162.4	Colubroidea Stratum	162.4	1
30741	CDC27	0	39	22.7	0	61.7	Colubroidea Stratum	162.4	0.379926
30742	MYL4	0	0	0	0	0	Colubroidea Stratum	162.4	0
30743	CACNB1	0	0	0	0	0	Colubroidea Stratum	162.4	0
30744	RPL19	0	0	0	0	0	Colubroidea Stratum	162.4	0
30745	STAC2	0	0	0	0	0	Colubroidea Stratum	162.4	0
30746	FBXL20	39	39	22.7	0	100.7	Colubroidea Stratum	162.4	0.620074
30747	MED1	0	0	0	0	0	Colubroidea Stratum	162.4	0
30748	CDK12	39	39	22.7	0	100.7	Colubroidea Stratum	162.4	0.620074
30749	NEUROD2	0	0	0	0	0	Colubroidea Stratum	162.4	0
30750	PPP1R1B	0	0	0	0	0	Colubroidea Stratum	162.4	0
30751	STARD3	0	0	0	0	0	Colubroidea Stratum	162.4	0
30752	MREG	0	0	0	0	0	Colubroidea Stratum	162.4	0
30753	TCAP	0	0	0	0	0	Colubroidea Stratum	162.4	0
30754	PNMT	0	0	0	0	0	Colubroidea Stratum	162.4	0
30755	PGAP3	0	0	0	0	0	Colubroidea Stratum	162.4	0
30756	ERBB2	0	0	0	0	0	Colubroidea Stratum	162.4	0
30757	MIEN1	0	0	0	0	0	Colubroidea Stratum	162.4	0
30758	GRB7	0	0	0	0	0	Colubroidea Stratum	162.4	0
30759	RDH8	0	0	0	0	0	Colubroidea Stratum	162.4	0
30760	IKZF3	0	0	0	0	0	Colubroidea Stratum	162.4	0
30761	ZPBP2	0	0	0	0	0	Colubroidea Stratum	162.4	0
30762	LRRC3C	0	0	0	0	0	Colubroidea Stratum	162.4	0
30763	ORMDL3	0	0	0	0	0	Colubroidea Stratum	162.4	0
30764	GSDMB	0	0	0	0	0	Colubroidea Stratum	162.4	0
30765	PSMD3	39	39	22.7	61.7	162.4	Colubroidea Stratum	162.4	1
30766	CSF3	0	0	0	0	0	Colubroidea Stratum	162.4	0
30767	MED24	0	0	0	0	0	Colubroidea Stratum	162.4	0
30768	THRA	0	0	0	0	0	Colubroidea Stratum	162.4	0
30769	NR1D1	0	0	0	61.7	61.7	Colubroidea Stratum	162.4	0.379926
30771	CASC3	0	0	0	0	0	Colubroidea Stratum	162.4	0
30772	RAPGEFL1	0	0	0	0	0	Colubroidea Stratum	162.4	0
30773	WIPF2	0	0	0	0	0	Colubroidea Stratum	162.4	0
30774	CDC6	0	0	0	0	0	Colubroidea Stratum	162.4	0
30775	RARA	0	39	22.7	0	61.7	Colubroidea Stratum	162.4	0.379926
30776	GJD3	0	0	0	0	0	Colubroidea Stratum	162.4	0
30777	TOP2A	0	0	0	61.7	61.7	Colubroidea Stratum	162.4	0.379926
30778	IGFBP4	0	0	0	0	0	Colubroidea Stratum	162.4	0
30779	TNS4	0	0	0	0	0	Colubroidea Stratum	162.4	0
30780	CCR7	0	0	0	0	0	Colubroidea Stratum	162.4	0
30781	SMARCE1	0	0	0	0	0	Colubroidea Stratum	162.4	0
30782	EIF1	0	0	0	0	0	Colubroidea Stratum	162.4	0
30783	P3H4	0	0	0	0	0	Colubroidea Stratum	162.4	0
30784	JUP	0	39	22.7	0	61.7	Colubroidea Stratum	162.4	0.379926
30785	HAP1	0	0	0	0	0	Colubroidea Stratum	162.4	0
30786	SMIM19	0	0	0	0	0	Colubroidea Stratum	162.4	0
30787	SULT1B1	0	0	0	0	0	Colubroidea Stratum	162.4	0
30788	SULT1E1	0	0	0	0	0	Colubroidea Stratum	162.4	0
30789	MUC17	0	0	0	0	0	Colubroidea Stratum	162.4	0
30790	UGT2A1	0	0	0	0	0	Colubroidea Stratum	162.4	0
30791	UGT2A2	0	0	0	0	0	Colubroidea Stratum	162.4	0
30792	UGT2A3	0	39	22.7	0	61.7	Colubroidea Stratum	162.4	0.379926
30793	YTHDC1	39	39	22.7	61.7	162.4	Colubroidea Stratum	162.4	1
30794	RDM1	0	0	0	0	0	Colubroidea Stratum	162.4	0
30795	LRRC37A	0	0	0	0	0	Colubroidea Stratum	162.4	0
30796	FAM71A	0	0	0	0	0	Colubroidea Stratum	162.4	0
30797	FAM71B	0	0	0	0	0	Colubroidea Stratum	162.4	0
30798	FAM71C	0	0	0	0	0	Colubroidea Stratum	162.4	0
30799	CRHR1	0	0	0	0	0	Colubroidea Stratum	162.4	0
30800	ZSCAN30	0	0	0	0	0	Colubroidea Stratum	162.4	0
30801	SMARCD2	0	0	0	0	0	Colubroidea Stratum	162.4	0
30802	PSMC5	0	0	0	0	0	Colubroidea Stratum	162.4	0
30803	FTSJ3	0	0	0	0	0	Colubroidea Stratum	162.4	0
30804	PRR29	0	0	0	0	0	Colubroidea Stratum	162.4	0
30805	ASIC2	0	0	0	0	0	Colubroidea Stratum	162.4	0
30806	ATP6V0A1	0	0	0	0	0	Colubroidea Stratum	162.4	0
30807	CAVIN1	0	0	0	0	0	Colubroidea Stratum	162.4	0
30808	STAT3	0	0	0	0	0	Colubroidea Stratum	162.4	0
30809	STAT5B	0	39	22.7	61.7	123.4	Colubroidea Stratum	162.4	0.759852
30810	PIBPPDD4L	0	0	0	0	0	Colubroidea Stratum	162.4	0
30811	HCRT	0	0	0	0	0	Colubroidea Stratum	162.4	0
30812	KCNH4	0	0	0	0	0	Colubroidea Stratum	162.4	0
30813	KAT2B	0	0	0	0	0	Colubroidea Stratum	162.4	0
30814	KAT2A	0	0	0	0	0	Colubroidea Stratum	162.4	0
30815	NAGLU	0	0	0	0	0	Colubroidea Stratum	162.4	0
30816	COASY	0	0	0	0	0	Colubroidea Stratum	162.4	0
30817	COQ10B	0	0	0	0	0	Colubroidea Stratum	162.4	0
30818	cisd3	0	0	0	0	0	Colubroidea Stratum	162.4	0
30819	MLLT6	0	0	0	0	0	Colubroidea Stratum	162.4	0
30820	EPOP	0	0	0	0	0	Colubroidea Stratum	162.4	0
30821	SRCIN1	0	0	0	0	0	Colubroidea Stratum	162.4	0
30822	ARHGAP23	0	0	0	0	0	Colubroidea Stratum	162.4	0
30823	SOCS7	0	0	0	61.7	61.7	Colubroidea Stratum	162.4	0.379926
30824	GPR179	0	0	0	0	0	Colubroidea Stratum	162.4	0
30825	MRPL45	0	0	0	0	0	Colubroidea Stratum	162.4	0
30826	NPEPPS	0	0	0	61.7	61.7	Colubroidea Stratum	162.4	0.379926
30827	KPNB1	39	39	22.7	61.7	162.4	Colubroidea Stratum	162.4	1
30828	TBKBP1	0	0	0	0	0	Colubroidea Stratum	162.4	0
30829	TBX21	0	0	0	0	0	Colubroidea Stratum	162.4	0
30830	OSBPL7	0	0	0	0	0	Colubroidea Stratum	162.4	0
30831	MRPL10	0	0	0	0	0	Colubroidea Stratum	162.4	0
30832	LRRC46	0	0	0	0	0	Colubroidea Stratum	162.4	0
30833	SCRN2	0	0	0	0	0	Colubroidea Stratum	162.4	0
30834	SP6	0	0	0	0	0	Colubroidea Stratum	162.4	0
30835	SP2	39	39	22.7	61.7	162.4	Colubroidea Stratum	162.4	1
30836	PNPO	0	0	0	0	0	Colubroidea Stratum	162.4	0
30837	PRR15L	0	0	0	0	0	Colubroidea Stratum	162.4	0
30838	CDK5RAP3	0	0	0	0	0	Colubroidea Stratum	162.4	0
30839	COPZ2	0	0	0	0	0	Colubroidea Stratum	162.4	0
30840	NFE2L1	39	39	22.7	0	100.7	Colubroidea Stratum	162.4	0.620074
30841	CBX1	0	39	22.7	0	61.7	Colubroidea Stratum	162.4	0.379926
30842	SNX11	0	0	0	0	0	Colubroidea Stratum	162.4	0
30843	SKAP1	0	0	0	0	0	Colubroidea Stratum	162.4	0
30844	HOXB1	0	0	0	0	0	Colubroidea Stratum	162.4	0
30845	HOXB2	0	0	0	0	0	Colubroidea Stratum	162.4	0
30846	HOXB3	0	0	0	0	0	Colubroidea Stratum	162.4	0
30847	HOXB4	0	0	0	0	0	Colubroidea Stratum	162.4	0
30848	HOXB5	0	0	0	0	0	Colubroidea Stratum	162.4	0
30849	HOXB6	0	0	0	0	0	Colubroidea Stratum	162.4	0
30850	HOXB7	0	0	0	0	0	Colubroidea Stratum	162.4	0
30851	HOXB8	0	0	0	0	0	Colubroidea Stratum	162.4	0
30852	HOXB9	0	0	0	0	0	Colubroidea Stratum	162.4	0
30853	HOXB13	0	0	0	0	0	Colubroidea Stratum	162.4	0
30854	TTLL6	0	0	0	0	0	Colubroidea Stratum	162.4	0
30855	CALCOCO2	0	0	0	0	0	Colubroidea Stratum	162.4	0
30856	ATP5MC1	0	0	0	0	0	Colubroidea Stratum	162.4	0
30857	UBE2Z	0	0	0	61.7	61.7	Colubroidea Stratum	162.4	0.379926
30858	SNF8	0	0	0	0	0	Colubroidea Stratum	162.4	0
30859	GIP	0	0	0	0	0	Colubroidea Stratum	162.4	0
30860	IGF2BP1	0	39	22.7	0	61.7	Colubroidea Stratum	162.4	0.379926
30861	B4GALNT2	0	0	0	0	0	Colubroidea Stratum	162.4	0
30862	GNGT2	0	0	0	0	0	Colubroidea Stratum	162.4	0
30863	ABI3	0	0	0	0	0	Colubroidea Stratum	162.4	0
30864	PHOSPHO1	0	0	0	0	0	Colubroidea Stratum	162.4	0
30865	ZNF652	0	0	0	61.7	61.7	Colubroidea Stratum	162.4	0.379926
30866	PHB	0	0	0	0	0	Colubroidea Stratum	162.4	0
30867	NGFR	0	0	0	0	0	Colubroidea Stratum	162.4	0
30868	NXPH3	0	0	0	0	0	Colubroidea Stratum	162.4	0
30869	SPOP	0	39	22.7	0	61.7	Colubroidea Stratum	162.4	0.379926
30870	SLC35B1	0	0	0	0	0	Colubroidea Stratum	162.4	0
30871	FAM117A	0	0	0	0	0	Colubroidea Stratum	162.4	0
30872	KAT7	39	39	22.7	0	100.7	Colubroidea Stratum	162.4	0.620074
30873	DLX4	0	39	22.7	0	61.7	Colubroidea Stratum	162.4	0.379926
30874	DLX3	0	39	22.7	0	61.7	Colubroidea Stratum	162.4	0.379926
30875	ITGA3	0	39	22.7	0	61.7	Colubroidea Stratum	162.4	0.379926
30876	PDK2	0	0	0	0	0	Colubroidea Stratum	162.4	0
30877	SAMD14	0	0	0	0	0	Colubroidea Stratum	162.4	0
30878	PPP1R9B	0	0	0	0	0	Colubroidea Stratum	162.4	0
30879	SGCA	0	0	0	0	0	Colubroidea Stratum	162.4	0
30880	H1-9P	0	0	0	0	0	Colubroidea Stratum	162.4	0
30881	COL1A1	0	39	22.7	0	61.7	Colubroidea Stratum	162.4	0.379926
30882	MPP2	0	0	0	0	0	Colubroidea Stratum	162.4	0
30883	PYY	0	0	0	0	0	Colubroidea Stratum	162.4	0
30884	TMEM101	0	0	0	0	0	Colubroidea Stratum	162.4	0
30885	ETV4	0	0	0	0	0	Colubroidea Stratum	162.4	0
30886	MEOX1	0	0	0	0	0	Colubroidea Stratum	162.4	0
30887	SOST	0	0	0	0	0	Colubroidea Stratum	162.4	0
30888	DUSP3	0	0	0	0	0	Colubroidea Stratum	162.4	0
30889	LOC100555542	0	0	0	0	0	Colubroidea Stratum	162.4	0
30890	CFAP97D1	0	0	0	0	0	Colubroidea Stratum	162.4	0
30891	MPP3	0	0	0	0	0	Colubroidea Stratum	162.4	0
30892	KCNJ9	0	0	0	0	0	Colubroidea Stratum	162.4	0
30893	SLIT2	0	0	0	0	0	Colubroidea Stratum	162.4	0
30895	G6PC3	0	0	0	0	0	Colubroidea Stratum	162.4	0
30896	HDAC5	0	39	22.7	0	61.7	Colubroidea Stratum	162.4	0.379926
30897	CCDC47	0	0	0	0	0	Colubroidea Stratum	162.4	0
30898	STRADA	0	0	0	0	0	Colubroidea Stratum	162.4	0
30899	DDX42	0	39	22.7	0	61.7	Colubroidea Stratum	162.4	0.379926
30900	LOC428277	0	0	0	0	0	Colubroidea Stratum	162.4	0
30901	ARL5C	0	0	0	0	0	Colubroidea Stratum	162.4	0
30902	PLXDC1	0	0	0	0	0	Colubroidea Stratum	162.4	0
30903	FBXO47	0	0	0	0	0	Colubroidea Stratum	162.4	0
30904	LASP1	39	39	22.7	0	100.7	Colubroidea Stratum	162.4	0.620074
30905	IRF3	0	0	0	0	0	Colubroidea Stratum	162.4	0
30906	SCAF1	39	39	22.7	0	100.7	Colubroidea Stratum	162.4	0.620074
30907	RRAS	0	39	22.7	0	61.7	Colubroidea Stratum	162.4	0.379926
30908	PRR12	0	39	22.7	0	61.7	Colubroidea Stratum	162.4	0.379926
30909	PRRG2	0	0	0	0	0	Colubroidea Stratum	162.4	0
30910	NOSIP	0	0	0	0	0	Colubroidea Stratum	162.4	0
30911	RCN3	0	0	0	0	0	Colubroidea Stratum	162.4	0
30912	PAX6	0	0	0	0	0	Colubroidea Stratum	162.4	0
30913	CPT1C	0	0	0	0	0	Colubroidea Stratum	162.4	0
30914	TSKS	0	0	0	0	0	Colubroidea Stratum	162.4	0
30915	AP2A1	39	0	22.7	61.7	123.4	Colubroidea Stratum	162.4	0.759852
30916	FUZ	39	39	22.7	61.7	162.4	Colubroidea Stratum	162.4	1
30917	MED25	0	0	0	0	0	Colubroidea Stratum	162.4	0
30918	PTOV1	0	0	0	0	0	Colubroidea Stratum	162.4	0
30919	LHB	0	0	0	0	0	Colubroidea Stratum	162.4	0
30920	NTF4	0	0	0	0	0	Colubroidea Stratum	162.4	0
30921	KCNA7	0	0	0	0	0	Colubroidea Stratum	162.4	0
30922	SNRNP70	39	0	22.7	61.7	123.4	Colubroidea Stratum	162.4	0.759852
30923	LIN7B	0	0	0	0	0	Colubroidea Stratum	162.4	0
30924	PPFIA3	0	0	0	0	0	Colubroidea Stratum	162.4	0
30925	TRPM4	0	0	0	0	0	Colubroidea Stratum	162.4	0
30926	PNKP	0	0	0	0	0	Colubroidea Stratum	162.4	0
30927	RUVBL2	0	0	0	0	0	Colubroidea Stratum	162.4	0
30928	BCL2L12	0	0	0	0	0	Colubroidea Stratum	162.4	0
30929	NR1H2	0	0	0	0	0	Colubroidea Stratum	162.4	0
30930	POLD1	0	0	0	0	0	Colubroidea Stratum	162.4	0
30931	SPIB	0	0	0	0	0	Colubroidea Stratum	162.4	0
30932	MYBPC2	0	0	0	0	0	Colubroidea Stratum	162.4	0
30933	FAM71E1	0	0	0	0	0	Colubroidea Stratum	162.4	0
30934	EMC10	0	0	0	0	0	Colubroidea Stratum	162.4	0
30935	SYT3	0	0	0	0	0	Colubroidea Stratum	162.4	0
30936	C19orf81	0	0	0	0	0	Colubroidea Stratum	162.4	0
30937	SHANK1	0	0	0	0	0	Colubroidea Stratum	162.4	0
30938	CLEC11A	0	0	0	0	0	Colubroidea Stratum	162.4	0
30939	LRRC4B	0	0	0	0	0	Colubroidea Stratum	162.4	0
30940	ASPDH	0	0	0	0	0	Colubroidea Stratum	162.4	0
30941	JOSD2	0	0	0	0	0	Colubroidea Stratum	162.4	0
30942	RBFOX1	0	0	0	0	0	Colubroidea Stratum	162.4	0
30943	THAP7	0	0	0	0	0	Colubroidea Stratum	162.4	0
30944	SLC27A5	0	0	0	0	0	Colubroidea Stratum	162.4	0
30945	ZBTB45	0	0	0	0	0	Colubroidea Stratum	162.4	0
30946	ZNF420	0	0	0	0	0	Colubroidea Stratum	162.4	0
30947	TRIM28	0	39	22.7	0	61.7	Colubroidea Stratum	162.4	0.379926
30948	UBE2M	0	39	22.7	0	61.7	Colubroidea Stratum	162.4	0.379926
30949	CHMP2A	0	0	0	0	0	Colubroidea Stratum	162.4	0
30950	BSPH1	0	0	0	0	0	Colubroidea Stratum	162.4	0
30951	PLA2G4C	0	0	0	0	0	Colubroidea Stratum	162.4	0
30952	AFM	0	0	0	0	0	Colubroidea Stratum	162.4	0
30953	PLA2G4C	0	0	0	0	0	Colubroidea Stratum	162.4	0
30954	SBK2	0	0	0	0	0	Colubroidea Stratum	162.4	0
30955	SBK3	0	0	0	0	0	Colubroidea Stratum	162.4	0
30956	SSC5D	0	0	0	0	0	Colubroidea Stratum	162.4	0
30957	DMBT1	0	0	0	0	0	Colubroidea Stratum	162.4	0
30958	TNXB	0	0	0	0	0	Colubroidea Stratum	162.4	0
30959	SCART1	0	0	0	0	0	Colubroidea Stratum	162.4	0
30960	CD5L	0	0	0	0	0	Colubroidea Stratum	162.4	0
30961	NAT14	0	0	0	0	0	Colubroidea Stratum	162.4	0
30962	ZNF628	0	0	0	0	0	Colubroidea Stratum	162.4	0
30963	SBK1	0	0	0	0	0	Colubroidea Stratum	162.4	0
30964	ZSCAN31	0	0	0	0	0	Colubroidea Stratum	162.4	0
30965	DMBT1	0	0	0	0	0	Colubroidea Stratum	162.4	0
30966	VWA5A	0	0	0	0	0	Colubroidea Stratum	162.4	0
30967	ZNF397	0	0	0	0	0	Colubroidea Stratum	162.4	0
30968	ZSCAN16	0	0	0	0	0	Colubroidea Stratum	162.4	0
30969	ZSWIM9	0	0	0	0	0	Colubroidea Stratum	162.4	0
30970	LIG1	0	0	0	0	0	Colubroidea Stratum	162.4	0
30971	ATF5	0	0	0	0	0	Colubroidea Stratum	162.4	0
30972	ARHGEF40	0	0	0	0	0	Colubroidea Stratum	162.4	0
30973	ZNF219	0	0	0	0	0	Colubroidea Stratum	162.4	0
30974	TPPP2	0	0	0	0	0	Colubroidea Stratum	162.4	0
30975	NDRG2	0	0	0	0	0	Colubroidea Stratum	162.4	0
30976	TPSG1	0	0	0	0	0	Colubroidea Stratum	162.4	0
30977	RNF112	0	0	0	0	0	Colubroidea Stratum	162.4	0
30978	MFAP4	0	0	0	0	0	Colubroidea Stratum	162.4	0
30979	ELOB	0	0	0	0	0	Colubroidea Stratum	162.4	0
30980	SRRM2	0	0	0	51	51	Crotalus-Sisturus-Protobothrops Stratum & Colubridae-Elapidae Stratum	80.5	0.63354
30981	CLDN4	0	0	0	0	0	Crotalus-Sisturus-Protobothrops Stratum & Colubridae-Elapidae Stratum	80.5	0
30982	CLDN9	0	0	0	0	0	Crotalus-Sisturus-Protobothrops Stratum & Colubridae-Elapidae Stratum	80.5	0
30983	CLDN6	0	0	0	0	0	Crotalus-Sisturus-Protobothrops Stratum & Colubridae-Elapidae Stratum	80.5	0
30984	PKMYT1	0	0	0	0	0	Crotalus-Sisturus-Protobothrops Stratum & Colubridae-Elapidae Stratum	80.5	0
30985	PAQR4	0	0	0	0	0	Crotalus-Sisturus-Protobothrops Stratum & Colubridae-Elapidae Stratum	80.5	0
30986	KREMEN2	0	0	0	0	0	Crotalus-Sisturus-Protobothrops Stratum & Colubridae-Elapidae Stratum	80.5	0
30987	ZNF444	0	0	0	0	0	Crotalus-Sisturus-Protobothrops Stratum & Colubridae-Elapidae Stratum	80.5	0
30988	ZSCAN18	0	0	0	0	0	Crotalus-Sisturus-Protobothrops Stratum & Colubridae-Elapidae Stratum	80.5	0
30989	SGF29	0	0	0	0	0	Crotalus-Sisturus-Protobothrops Stratum & Colubridae-Elapidae Stratum	80.5	0
30990	SULT1E1	0	0	0	0	0	Crotalus-Sisturus-Protobothrops Stratum & Colubridae-Elapidae Stratum	80.5	0
30991	NUPR1	0	0	0	0	0	Crotalus-Sisturus-Protobothrops Stratum & Colubridae-Elapidae Stratum	80.5	0
30992	LOC100567541	0	0	0	0	0	Crotalus-Sisturus-Protobothrops Stratum & Colubridae-Elapidae Stratum	80.5	0
30993	SULT1C4	0	0	0	0	0	Crotalus-Sisturus-Protobothrops Stratum & Colubridae-Elapidae Stratum	80.5	0
30994	SULT1B1	0	0	0	0	0	Crotalus-Sisturus-Protobothrops Stratum & Colubridae-Elapidae Stratum	80.5	0
30995	PITPNA	0	0	0	0	0	Crotalus-Sisturus-Protobothrops Stratum & Colubridae-Elapidae Stratum	80.5	0
30996	CLN3	0	0	0	0	0	Crotalus-Sisturus-Protobothrops Stratum & Colubridae-Elapidae Stratum	80.5	0
30997	EIF3C	0	0	0	0	0	Crotalus-Sisturus-Protobothrops Stratum & Colubridae-Elapidae Stratum	80.5	0
30998	PRODH2	0	0	0	0	0	Crotalus-Sisturus-Protobothrops Stratum & Colubridae-Elapidae Stratum	80.5	0
30999	CABP5	0	0	0	0	0	Crotalus-Sisturus-Protobothrops Stratum & Colubridae-Elapidae Stratum	80.5	0
31000	ADPRHL	0	0	0	0	0	Crotalus-Sisturus-Protobothrops Stratum & Colubridae-Elapidae Stratum	80.5	0
31001	SPNS1	0	0	0	0	0	Crotalus-Sisturus-Protobothrops Stratum & Colubridae-Elapidae Stratum	80.5	0
31002	NFATC2IP	0	0	0	0	0	Crotalus-Sisturus-Protobothrops Stratum & Colubridae-Elapidae Stratum	80.5	0
31003	CD19	0	0	0	0	0	Crotalus-Sisturus-Protobothrops Stratum & Colubridae-Elapidae Stratum	80.5	0
31004	ATP2A1	0	0	0	0	0	Crotalus-Sisturus-Protobothrops Stratum & Colubridae-Elapidae Stratum	80.5	0
31005	SH2B1	0	0	0	0	0	Crotalus-Sisturus-Protobothrops Stratum & Colubridae-Elapidae Stratum	80.5	0
31006	ATXN2L	0	0	0	0	0	Crotalus-Sisturus-Protobothrops Stratum & Colubridae-Elapidae Stratum	80.5	0
31007	TUFM	0	0	0	0	0	Crotalus-Sisturus-Protobothrops Stratum & Colubridae-Elapidae Stratum	80.5	0
31008	RABEP2	0	0	0	0	0	Crotalus-Sisturus-Protobothrops Stratum & Colubridae-Elapidae Stratum	80.5	0
31009	ACP4	0	0	0	0	0	Crotalus-Sisturus-Protobothrops Stratum & Colubridae-Elapidae Stratum	80.5	0
31010	LOC100563818	0	0	0	0	0	Crotalus-Sisturus-Protobothrops Stratum & Colubridae-Elapidae Stratum	80.5	0
31011	NAPSA	0	0	0	0	0	Crotalus-Sisturus-Protobothrops Stratum & Colubridae-Elapidae Stratum	80.5	0
31012	KCNC3	0	0	0	0	0	Crotalus-Sisturus-Protobothrops Stratum & Colubridae-Elapidae Stratum	80.5	0
31013	TBC1D17	0	0	0	0	0	Crotalus-Sisturus-Protobothrops Stratum & Colubridae-Elapidae Stratum	80.5	0
31014	AKT1S1	0	0	0	0	0	Crotalus-Sisturus-Protobothrops Stratum & Colubridae-Elapidae Stratum	80.5	0
31015	TSPAN4	0	0	0	0	0	Crotalus-Sisturus-Protobothrops Stratum & Colubridae-Elapidae Stratum	80.5	0
31016	PRMT1	0	0	0	0	0	Crotalus-Sisturus-Protobothrops Stratum & Colubridae-Elapidae Stratum	80.5	0
31017	GYS1	0	0	0	0	0	Crotalus-Sisturus-Protobothrops Stratum & Colubridae-Elapidae Stratum	80.5	0
31018	FTL	0	0	0	0	0	Crotalus-Sisturus-Protobothrops Stratum & Colubridae-Elapidae Stratum	80.5	0
31019	FTH1	0	0	0	0	0	Crotalus-Sisturus-Protobothrops Stratum & Colubridae-Elapidae Stratum	80.5	0
31020	BAX	0	0	0	0	0	Crotalus-Sisturus-Protobothrops Stratum & Colubridae-Elapidae Stratum	80.5	0
31021	SLC6A16	0	0	0	0	0	Crotalus-Sisturus-Protobothrops Stratum & Colubridae-Elapidae Stratum	80.5	0
31022	CD37	0	0	0	0	0	Crotalus-Sisturus-Protobothrops Stratum & Colubridae-Elapidae Stratum	80.5	0
31023	TEAD2	0	0	0	0	0	Crotalus-Sisturus-Protobothrops Stratum & Colubridae-Elapidae Stratum	80.5	0
31024	KASH5	0	0	0	0	0	Crotalus-Sisturus-Protobothrops Stratum & Colubridae-Elapidae Stratum	80.5	0
31025	KRAS	0	0	0	0	0	Crotalus-Sisturus-Protobothrops Stratum & Colubridae-Elapidae Stratum	80.5	0
31026	GAL	0	0	0	0	0	Crotalus-Sisturus-Protobothrops Stratum & Colubridae-Elapidae Stratum	80.5	0
31027	PTH2	0	0	0	0	0	Crotalus-Sisturus-Protobothrops Stratum & Colubridae-Elapidae Stratum	80.5	0
31028	ALDH16A1	0	0	0	0	0	Crotalus-Sisturus-Protobothrops Stratum & Colubridae-Elapidae Stratum	80.5	0
31029	PIH1D1	0	0	0	0	0	Crotalus-Sisturus-Protobothrops Stratum & Colubridae-Elapidae Stratum	80.5	0
31030	SLC17A7	0	29.5	0	0	29.5	Crotalus-Sisturus-Protobothrops Stratum & Colubridae-Elapidae Stratum	80.5	0.36646
31031	RPL13A	0	0	0	0	0	Crotalus-Sisturus-Protobothrops Stratum & Colubridae-Elapidae Stratum	80.5	0
31032	DHDH	0	0	0	0	0	Crotalus-Sisturus-Protobothrops Stratum & Colubridae-Elapidae Stratum	80.5	0
31033	TULP2	0	0	0	0	0	Crotalus-Sisturus-Protobothrops Stratum & Colubridae-Elapidae Stratum	80.5	0
31034	NUCB1	0	0	0	0	0	Crotalus-Sisturus-Protobothrops Stratum & Colubridae-Elapidae Stratum	80.5	0
31035	BCAT2	0	0	0	0	0	Crotalus-Sisturus-Protobothrops Stratum & Colubridae-Elapidae Stratum	80.5	0
31036	PLEKHA4	0	0	0	0	0	Crotalus-Sisturus-Protobothrops Stratum & Colubridae-Elapidae Stratum	80.5	0
31037	HSD17B14	0	0	0	0	0	Crotalus-Sisturus-Protobothrops Stratum & Colubridae-Elapidae Stratum	80.5	0
31038	FGF21	0	0	0	0	0	Crotalus-Sisturus-Protobothrops Stratum & Colubridae-Elapidae Stratum	80.5	0
31039	TNNI3	0	0	0	0	0	Crotalus-Sisturus-Protobothrops Stratum & Colubridae-Elapidae Stratum	80.5	0
31040	DNAAF3	0	0	0	0	0	Crotalus-Sisturus-Protobothrops Stratum & Colubridae-Elapidae Stratum	80.5	0
31041	TMEM86B	0	0	0	0	0	Crotalus-Sisturus-Protobothrops Stratum & Colubridae-Elapidae Stratum	80.5	0
31042	SYT5	0	0	0	0	0	Crotalus-Sisturus-Protobothrops Stratum & Colubridae-Elapidae Stratum	80.5	0
31043	PTPRH	0	0	0	0	0	Crotalus-Sisturus-Protobothrops Stratum & Colubridae-Elapidae Stratum	80.5	0
31044	PPP6R1	0	29.5	0	48	77.5	Crotalus-Sisturus-Protobothrops Stratum & Colubridae Stratum	77.5	1
31045	HSPBP1	0	29.5	0	0	29.5	Crotalus-Sisturus-Protobothrops Stratum & Colubridae Stratum	77.5	0.380645
31046	BRSK1	0	0	0	0	0	Crotalus-Sisturus-Protobothrops Stratum & Colubridae Stratum	77.5	0
31047	TMEM150B	0	0	0	0	0	Crotalus-Sisturus-Protobothrops Stratum & Colubridae Stratum	77.5	0
31048	KMT5C	0	0	0	0	0	Crotalus-Sisturus-Protobothrops Stratum & Colubridae Stratum	77.5	0
31049	TARM1	0	0	0	0	0	Crotalus-Sisturus-Protobothrops Stratum & Colubridae Stratum	77.5	0
31050	TTYH1	0	29.5	0	0	29.5	Crotalus-Sisturus-Protobothrops Stratum & Colubridae Stratum	77.5	0.380645
31051	LENG8	0	29.5	0	0	29.5	Crotalus-Sisturus-Protobothrops Stratum & Colubridae Stratum	77.5	0.380645
31052	LENG9	0	0	0	0	0	Crotalus-Sisturus-Protobothrops Stratum & Colubridae Stratum	77.5	0
31053	CDC42EP5	0	0	0	0	0	Crotalus-Sisturus-Protobothrops Stratum & Colubridae Stratum	77.5	0
31054	EPS8L1	0	0	0	0	0	Crotalus-Sisturus-Protobothrops Stratum & Colubridae Stratum	77.5	0
31055	PPP1R12C	0	0	0	0	0	Crotalus-Sisturus-Protobothrops Stratum & Colubridae Stratum	77.5	0
31056	TNNT1	0	0	0	0	0	Crotalus-Sisturus-Protobothrops Stratum & Colubridae Stratum	77.5	0
31057	CYTH2	0	0	0	0	0	Crotalus-Sisturus-Protobothrops Stratum & Colubridae Stratum	77.5	0
31058	FUT1	0	0	0	0	0	Crotalus-Sisturus-Protobothrops Stratum & Colubridae Stratum	77.5	0
31059	FUT2	0	0	0	0	0	Crotalus-Sisturus-Protobothrops Stratum & Colubridae Stratum	77.5	0
31060	KCNJ14	0	0	0	0	0	Crotalus-Sisturus-Protobothrops Stratum & Colubridae Stratum	77.5	0
31061	TLR5	0	0	0	0	0	Crotalus-Sisturus-Protobothrops Stratum & Colubridae Stratum	77.5	0
31062	LMTK3	0	0	0	0	0	Crotalus-Sisturus-Protobothrops Stratum & Colubridae Stratum	77.5	0
31063	RPS9	0	0	0	0	0	Crotalus-Sisturus-Protobothrops Stratum & Colubridae Stratum	77.5	0
31064	SOCS3	0	0	0	0	0	Crotalus-Sisturus-Protobothrops Stratum & Colubridae Stratum	77.5	0
31065	CACNG7	0	0	0	0	0	Crotalus-Sisturus-Protobothrops Stratum & Colubridae Stratum	77.5	0
31066	CACNG8	0	0	0	0	0	Crotalus-Sisturus-Protobothrops Stratum & Colubridae Stratum	77.5	0
31067	CACNG6	0	0	0	0	0	Crotalus-Sisturus-Protobothrops Stratum & Colubridae Stratum	77.5	0
31068	PRKCG	0	0	0	0	0	Crotalus-Sisturus-Protobothrops Stratum & Colubridae Stratum	77.5	0
31069	MYADM	0	0	0	0	0	Crotalus-Sisturus-Protobothrops Stratum & Colubridae Stratum	77.5	0
31070	ODAD1	0	0	0	0	0	Crotalus-Sisturus-Protobothrops Stratum & Colubridae Stratum	77.5	0
31071	EMP3	0	0	0	0	0	Crotalus-Sisturus-Protobothrops Stratum & Colubridae Stratum	77.5	0
31072	TMEM143	0	0	0	0	0	Crotalus-Sisturus-Protobothrops Stratum & Colubridae Stratum	77.5	0
31073	SYNGR4	0	0	0	0	0	Crotalus-Sisturus-Protobothrops Stratum & Colubridae Stratum	77.5	0
31074	KDELR1	0	0	0	0	0	Crotalus-Sisturus-Protobothrops Stratum & Colubridae Stratum	77.5	0
31075	GRIN2D	0	0	0	0	0	Crotalus-Sisturus-Protobothrops Stratum & Colubridae Stratum	77.5	0
31076	GRWD1	0	0	0	0	0	Crotalus-Sisturus-Protobothrops Stratum & Colubridae Stratum	77.5	0
31077	TSEN34	0	0	0	0	0	Crotalus-Sisturus-Protobothrops Stratum & Colubridae Stratum	77.5	0
31078	MBOAT7	0	0	0	0	0	Crotalus-Sisturus-Protobothrops Stratum & Colubridae Stratum	77.5	0
31079	TMC4	0	0	0	0	0	Crotalus-Sisturus-Protobothrops Stratum & Colubridae Stratum	77.5	0
31080	LENG1	0	0	0	0	0	Crotalus-Sisturus-Protobothrops Stratum & Colubridae Stratum	77.5	0
31081	CNOT3	0	0	0	0	0	Crotalus-Sisturus-Protobothrops Stratum & Colubridae Stratum	77.5	0
31082	PRPF31	0	0	0	0	0	Crotalus-Sisturus-Protobothrops Stratum & Colubridae Stratum	77.5	0
31083	TFPT	0	0	0	0	0	Crotalus-Sisturus-Protobothrops Stratum & Colubridae Stratum	77.5	0
31084	NDUFA3	0	0	0	0	0	Crotalus-Sisturus-Protobothrops Stratum & Colubridae Stratum	77.5	0
31085	FAM83E	0	0	0	0	0	Crotalus-Sisturus-Protobothrops Stratum & Colubridae Stratum	77.5	0
31086	SPACA4	0	0	0	0	0	Crotalus-Sisturus-Protobothrops Stratum & Colubridae Stratum	77.5	0
31087	SHISA7	0	0	0	0	0	Crotalus-Sisturus-Protobothrops Stratum & Colubridae Stratum	77.5	0
31088	UBE2S	0	0	0	48	48	Crotalus-Sisturus-Protobothrops Stratum & Colubridae Stratum	77.5	0.619355
31089	RCVRN	0	0	0	0	0	Crotalus-Sisturus-Protobothrops Stratum & Colubridae Stratum	77.5	0
31090	RPL28	0	0	0	0	0	Crotalus-Sisturus-Protobothrops Stratum & Colubridae Stratum	77.5	0
31091	GSG1	0	0	0	0	0	Crotalus-Sisturus-Protobothrops Stratum & Colubridae Stratum	77.5	0
31092	IL11	0	0	0	0	0	Crotalus-Sisturus-Protobothrops Stratum & Colubridae Stratum	77.5	0
31093	TMEM238	0	0	0	0	0	Crotalus-Sisturus-Protobothrops Stratum & Colubridae Stratum	77.5	0
31094	SPAG9	0	0	0	0	0	Crotalus-Sisturus-Protobothrops Stratum & Colubridae Stratum	77.5	0
31095	FAM71E2	0	0	0	0	0	Crotalus-Sisturus-Protobothrops Stratum & Colubridae Stratum	77.5	0
31096	COX6B2	0	0	0	0	0	Crotalus-Sisturus-Protobothrops Stratum & Colubridae Stratum	77.5	0
31097	RASIP1	0	29.5	0	0	29.5	Crotalus-Sisturus-Protobothrops Stratum & Colubridae Stratum	77.5	0.380645
31098	MRTFA	0	0	0	0	0	Crotalus-Sisturus-Protobothrops Stratum & Colubridae Stratum	77.5	0
31099	MAMSTR	0	0	0	0	0	Crotalus-Sisturus-Protobothrops Stratum & Colubridae Stratum	77.5	0
31100	NTN5	0	0	0	0	0	Crotalus-Sisturus-Protobothrops Stratum & Colubridae Stratum	77.5	0
31101	SULT2B1	0	0	0	0	0	Crotalus-Sisturus-Protobothrops Stratum & Colubridae Stratum	77.5	0
31102	CA11	0	0	0	0	0	Crotalus-Sisturus-Protobothrops Stratum & Colubridae Stratum	77.5	0
31103	SULT2B1	0	0	0	0	0	Crotalus-Sisturus-Protobothrops Stratum & Colubridae Stratum	77.5	0
31104	SPHK2	0	0	0	0	0	Crotalus-Sisturus-Protobothrops Stratum & Colubridae Stratum	77.5	0
31105	RPL18	0	0	0	48	48	Crotalus-Sisturus-Protobothrops Stratum & Colubridae Stratum	77.5	0.619355
31106	DBP	0	0	0	0	0	Crotalus-Sisturus-Protobothrops Stratum & Colubridae Stratum	77.5	0
31107	ISOC2	0	0	0	0	0	Crotalus-Sisturus-Protobothrops Stratum & Colubridae Stratum	77.5	0
31108	MYH14	0	0	0	0	0	Crotalus-Sisturus-Protobothrops Stratum & Colubridae Stratum	77.5	0
31109	IZUMO2	0	0	0	0	0	Crotalus-Sisturus-Protobothrops Stratum & Colubridae Stratum	77.5	0
31110	TBRG1	0	0	0	0	0	Crotalus-Sisturus-Protobothrops Stratum & Colubridae Stratum	77.5	0
31111	EPN1	0	0	0	0	0	Crotalus-Sisturus-Protobothrops Stratum & Colubridae Stratum	77.5	0
31112	U2AF2	0	0	0	0	0	Crotalus-Sisturus-Protobothrops Stratum & Colubridae Stratum	77.5	0
31113	CCDC106	0	0	0	0	0	Crotalus-Sisturus-Protobothrops Stratum & Colubridae Stratum	77.5	0
31114	SACS	0	0	0	0	0	Crotalus-Sisturus-Protobothrops Stratum & Colubridae Stratum	77.5	0
31115	C19orf85	0	0	0	0	0	Crotalus-Sisturus-Protobothrops Stratum & Colubridae Stratum	77.5	0
31116	LOC100558292	0	0	0	0	0	Crotalus-Sisturus-Protobothrops Stratum & Colubridae Stratum	77.5	0
31117	FIZ1	0	0	0	0	0	Crotalus-Sisturus-Protobothrops Stratum & Colubridae Stratum	77.5	0
31118	LOC100567673	0	0	0	0	0	Crotalus-Sisturus-Protobothrops Stratum & Colubridae Stratum	77.5	0
31119	TACO1	0	0	0	0	0	Crotalus-Sisturus-Protobothrops Stratum & Colubridae Stratum	77.5	0
31120	SLX1A	0	0	0	0	0	Crotalus-Sisturus-Protobothrops Stratum & Colubridae Stratum	77.5	0
31121	BOLA2	0	0	0	0	0	Crotalus-Sisturus-Protobothrops Stratum & Colubridae Stratum	77.5	0
31122	CORO1A	0	0	0	0	0	Crotalus-Sisturus-Protobothrops Stratum & Colubridae Stratum	77.5	0
31123	MAPK3	0	0	0	0	0	Crotalus-Sisturus-Protobothrops Stratum & Colubridae Stratum	77.5	0
31124	GDPD3	0	0	0	0	0	Crotalus-Sisturus-Protobothrops Stratum & Colubridae Stratum	77.5	0
31125	YPEL3	0	0	0	0	0	Crotalus-Sisturus-Protobothrops Stratum & Colubridae Stratum	77.5	0
31126	TBX6	0	0	0	0	0	Crotalus-Sisturus-Protobothrops Stratum & Colubridae Stratum	77.5	0
31127	PPP4C	0	0	0	0	0	Crotalus-Sisturus-Protobothrops Stratum & Colubridae Stratum	77.5	0
31128	ALDOA	0	0	0	0	0	Crotalus-Sisturus-Protobothrops Stratum & Colubridae Stratum	77.5	0
31129	CRK	0	0	0	0	0	Crotalus-Sisturus-Protobothrops Stratum & Colubridae Stratum	77.5	0
31130	TLCD3B	0	0	0	0	0	Crotalus-Sisturus-Protobothrops Stratum & Colubridae Stratum	77.5	0
31131	MVP	0	0	0	0	0	Crotalus-Sisturus-Protobothrops Stratum & Colubridae Stratum	77.5	0
31132	MAZ	0	0	0	0	0	Crotalus-Sisturus-Protobothrops Stratum & Colubridae Stratum	77.5	0
31133	PRRT2	0	0	0	0	0	Crotalus-Sisturus-Protobothrops Stratum & Colubridae Stratum	77.5	0
31134	CDIPT	0	0	0	0	0	Crotalus-Sisturus-Protobothrops Stratum & Colubridae Stratum	77.5	0
31135	TAOK2	0	0	0	0	0	Crotalus-Sisturus-Protobothrops Stratum & Colubridae Stratum	77.5	0
31136	KCTD13	0	0	0	0	0	Crotalus-Sisturus-Protobothrops Stratum & Colubridae Stratum	77.5	0
31137	KIF22	0	0	0	0	0	Crotalus-Sisturus-Protobothrops Stratum & Colubridae Stratum	77.5	0
31138	PAGR1	0	0	0	0	0	Crotalus-Sisturus-Protobothrops Stratum & Colubridae Stratum	77.5	0
31139	ASPHD1	0	29.5	0	0	29.5	Crotalus-Sisturus-Protobothrops Stratum & Colubridae Stratum	77.5	0.380645
31140	SEZ6L2	0	0	0	48	48	Crotalus-Sisturus-Protobothrops Stratum & Colubridae Stratum	77.5	0.619355
31141	DUSP14	0	0	0	0	0	Crotalus-Sisturus-Protobothrops Stratum & Colubridae Stratum	77.5	0
31142	HIRIP3	0	0	0	0	0	Crotalus-Sisturus-Protobothrops Stratum & Colubridae Stratum	77.5	0
31143	INO80E	0	0	0	0	0	Crotalus-Sisturus-Protobothrops Stratum & Colubridae Stratum	77.5	0
31144	DOC2A	0	0	0	0	0	Crotalus-Sisturus-Protobothrops Stratum & Colubridae Stratum	77.5	0
31145	ZG16	0	0	0	0	0	Crotalus-Sisturus-Protobothrops Stratum & Colubridae Stratum	77.5	0
31146	LOC100567618	0	0	0	0	0	Crotalus-Sisturus-Protobothrops Stratum & Colubridae Stratum	77.5	0
31147	TNFRSF12A	0	0	0	0	0	Crotalus-Sisturus-Protobothrops Stratum & Colubridae Stratum	77.5	0
31148	THOC6	0	0	0	0	0	Crotalus-Sisturus-Protobothrops Stratum & Colubridae Stratum	77.5	0
31149	HCFC1R1	0	0	0	0	0	Crotalus-Sisturus-Protobothrops Stratum & Colubridae Stratum	77.5	0
31150	RAB35	0	0	0	0	0	Crotalus-Sisturus-Protobothrops Stratum & Colubridae Stratum	77.5	0
31151	BICDL2	0	0	0	0	0	Crotalus-Sisturus-Protobothrops Stratum & Colubridae Stratum	77.5	0
31152	MMP25	0	0	0	0	0	Crotalus-Sisturus-Protobothrops Stratum & Colubridae Stratum	77.5	0
31153	ITGAM	0	0	0	0	0	Crotalus-Sisturus-Protobothrops Stratum & Colubridae Stratum	77.5	0
31154	CD2BP2	0	0	0	0	0	Crotalus-Sisturus-Protobothrops Stratum & Colubridae Stratum	77.5	0
31155	TBC1D10B	0	0	0	0	0	Crotalus-Sisturus-Protobothrops Stratum & Colubridae Stratum	77.5	0
31156	MYLPF	0	0	0	0	0	Crotalus-Sisturus-Protobothrops Stratum & Colubridae Stratum	77.5	0
31157	QPRT	0	0	0	0	0	Crotalus-Sisturus-Protobothrops Stratum & Colubridae Stratum	77.5	0
31158	DCTPP1	0	0	0	0	0	Crotalus-Sisturus-Protobothrops Stratum & Colubridae Stratum	77.5	0
31159	SEPTIN1	0	0	0	0	0	Crotalus-Sisturus-Protobothrops Stratum & Colubridae Stratum	77.5	0
31160	ITGAL	0	0	0	0	0	Crotalus-Sisturus-Protobothrops Stratum & Colubridae Stratum	77.5	0
31161	ZNF271P	0	0	0	0	0	Crotalus-Sisturus-Protobothrops Stratum & Colubridae Stratum	77.5	0
31162	BORCS6	0	0	0	0	0	Crotalus-Sisturus-Protobothrops Stratum & Colubridae Stratum	77.5	0
31163	PRR14	0	0	0	0	0	Crotalus-Sisturus-Protobothrops Stratum & Colubridae Stratum	77.5	0
31164	FBRS	0	0	0	0	0	Crotalus-Sisturus-Protobothrops Stratum & Colubridae Stratum	77.5	0
31165	ZNF853	0	0	0	0	0	Crotalus-Sisturus-Protobothrops Stratum & Colubridae Stratum	77.5	0
31166	SRCAP	0	0	0	0	0	Crotalus-Sisturus-Protobothrops Stratum & Colubridae Stratum	77.5	0
31167	PHKG2	0	0	0	0	0	Crotalus-Sisturus-Protobothrops Stratum & Colubridae Stratum	77.5	0
31168	CCDC189	0	0	0	0	0	Crotalus-Sisturus-Protobothrops Stratum & Colubridae Stratum	77.5	0
31169	TMEM265	0	0	0	0	0	Crotalus-Sisturus-Protobothrops Stratum & Colubridae Stratum	77.5	0
31170	RNF40	0	0	0	0	0	Crotalus-Sisturus-Protobothrops Stratum & Colubridae Stratum	77.5	0
31171	RUSF1	0	0	0	0	0	Crotalus-Sisturus-Protobothrops Stratum & Colubridae Stratum	77.5	0
31172	SLC5A2	0	0	0	0	0	Crotalus-Sisturus-Protobothrops Stratum & Colubridae Stratum	77.5	0
31173	CA4	0	29.5	0	0	29.5	Crotalus-Sisturus-Protobothrops Stratum & Colubridae Stratum	77.5	0.380645
31174	ARMC5	0	0	0	0	0	Crotalus-Sisturus-Protobothrops Stratum & Colubridae Stratum	77.5	0
31175	TGFB1I1	0	0	0	0	0	Crotalus-Sisturus-Protobothrops Stratum & Colubridae Stratum	77.5	0
31176	ITGAX	0	0	0	0	0	Crotalus-Sisturus-Protobothrops Stratum & Colubridae Stratum	77.5	0
31177	COX6A2	0	0	0	0	0	Crotalus-Sisturus-Protobothrops Stratum & Colubridae Stratum	77.5	0
31178	ITGAE	0	0	0	0	0	Crotalus-Sisturus-Protobothrops Stratum & Colubridae Stratum	77.5	0
31179	ITGAM	0	0	0	0	0	Crotalus-Sisturus-Protobothrops Stratum & Colubridae Stratum	77.5	0
31180	ITGAD	0	0	0	0	0	Crotalus-Sisturus-Protobothrops Stratum & Colubridae Stratum	77.5	0
31181	ITGAM	0	0	0	0	0	Crotalus-Sisturus-Protobothrops Stratum & Colubridae Stratum	77.5	0
31182	TRIM72	0	0	0	0	0	Crotalus-Sisturus-Protobothrops Stratum & Colubridae Stratum	77.5	0
31183	PYDC1	0	0	0	0	0	Crotalus-Sisturus-Protobothrops Stratum & Colubridae Stratum	77.5	0
31184	PYCARD	0	0	0	0	0	Crotalus-Sisturus-Protobothrops Stratum & Colubridae Stratum	77.5	0
31185	KAT8	0	0	0	48	48	Crotalus-Sisturus-Protobothrops Stratum & Colubridae Stratum	77.5	0.619355
31186	ZNF883	0	0	0	0	0	Crotalus-Sisturus-Protobothrops Stratum & Colubridae Stratum	77.5	0
31187	FBXL19	0	0	0	0	0	Crotalus-Sisturus-Protobothrops Stratum & Colubridae Stratum	77.5	0
31188	PRSS8	0	0	0	0	0	Crotalus-Sisturus-Protobothrops Stratum & Colubridae Stratum	77.5	0
31189	FUS	0	0	0	0	0	Crotalus-Sisturus-Protobothrops Stratum & Colubridae Stratum	77.5	0
31190	BCKDK	0	0	0	48	48	Crotalus-Sisturus-Protobothrops Stratum & Colubridae Stratum	77.5	0.619355
31191	VKORC1	0	0	0	0	0	Crotalus-Sisturus-Protobothrops Stratum & Colubridae Stratum	77.5	0
31192	PRSS53	0	0	0	0	0	Crotalus-Sisturus-Protobothrops Stratum & Colubridae Stratum	77.5	0
31193	ZNF646	0	0	0	0	0	Crotalus-Sisturus-Protobothrops Stratum & Colubridae Stratum	77.5	0
31194	FLT3LG	0	12.5	0	0	12.5	Crotalus-Sisturu Stratum & Colubridae Stratum	60.5	0.206612
31195	ZNF668	0	0	0	0	0	Crotalus-Sisturu Stratum & Colubridae Stratum	60.5	0
31196	PRF1	0	0	0	48	48	Crotalus-Sisturu Stratum & Colubridae Stratum	60.5	0.793388
31197	STX4	0	0	0	0	0	Crotalus-Sisturu Stratum & Colubridae Stratum	60.5	0
31198	STX1B	0	0	0	0	0	Crotalus-Sisturu Stratum & Colubridae Stratum	60.5	0
31199	HSD3B7	0	0	0	0	0	Crotalus-Sisturu Stratum & Colubridae Stratum	60.5	0
31200	SETD1A	0	0	0	0	0	Crotalus-Sisturu Stratum & Colubridae Stratum	60.5	0
31201	ORAI3	0	0	0	0	0	Crotalus-Sisturu Stratum & Colubridae Stratum	60.5	0
31202	CEBPZ	0	0	0	0	0	Crotalus-Sisturu Stratum & Colubridae Stratum	60.5	0
31203	CTF1	0	0	0	0	0	Crotalus-Sisturu Stratum & Colubridae Stratum	60.5	0
31204	BCL7C	0	0	0	0	0	Crotalus-Sisturu Stratum & Colubridae Stratum	60.5	0
31205	MAPK7	0	0	0	0	0	Crotalus-Sisturu Stratum & Colubridae Stratum	60.5	0
31206	TRIM27	0	0	0	0	0	Crotalus-Sisturu Stratum & Colubridae Stratum	60.5	0
31207	TRIM69	0	0	0	0	0	Crotalus-Sisturu Stratum & Colubridae Stratum	60.5	0
31208	RFPL4A	0	0	0	0	0	Crotalus-Sisturu Stratum & Colubridae Stratum	60.5	0
31209	MEFV	0	0	0	0	0	Crotalus-Sisturu Stratum & Colubridae Stratum	60.5	0
31210	RFPL4B	0	0	0	0	0	Crotalus-Sisturu Stratum & Colubridae Stratum	60.5	0
31211	SLC39A2	0	0	0	0	0	Crotalus-Sisturu Stratum & Colubridae Stratum	60.5	0
31212	METTL17	0	0	0	0	0	Crotalus-Sisturu Stratum & Colubridae Stratum	60.5	0
31213	RNASE4	0	0	0	0	0	Crotalus-Sisturu Stratum & Colubridae Stratum	60.5	0
31214	ANG	0	0	0	0	0	Crotalus-Sisturu Stratum & Colubridae Stratum	60.5	0
31215	REG4	0	0	0	0	0	Crotalus-Sisturu Stratum & Colubridae Stratum	60.5	0
31216	RNASE4	0	0	0	0	0	Crotalus-Sisturu Stratum & Colubridae Stratum	60.5	0
31217	REG4	0	0	0	0	0	Crotalus-Sisturu Stratum & Colubridae Stratum	60.5	0
31218	REG4	0	0	0	0	0	Crotalus-Sisturu Stratum & Colubridae Stratum	60.5	0
31219	REG4	0	0	0	0	0	Crotalus-Sisturu Stratum & Colubridae Stratum	60.5	0
31220	PNP	0	0	0	0	0	Crotalus-Sisturu Stratum & Colubridae Stratum	60.5	0
31221	PIP4P1	0	0	0	0	0	Crotalus-Sisturu Stratum & Colubridae Stratum	60.5	0
31222	APEX1	0	0	0	0	0	Crotalus-Sisturu Stratum & Colubridae Stratum	60.5	0
31223	OSGEP	0	0	0	0	0	Crotalus-Sisturu Stratum & Colubridae Stratum	60.5	0
31224	SLC12A3	0	0	0	0	0	Crotalus-Sisturu Stratum & Colubridae Stratum	60.5	0
31225	LPCAT4	0	0	0	0	0	Crotalus-Sisturu Stratum & Colubridae Stratum	60.5	0
31226	KLHL26	0	0	0	0	0	Crotalus-Sisturu Stratum & Colubridae Stratum	60.5	0
31227	TEP1	0	0	0	0	0	Crotalus-Sisturu Stratum & Colubridae Stratum	60.5	0
31228	PARP2	0	0	0	0	0	Crotalus-Sisturu Stratum & Colubridae Stratum	60.5	0
31229	PRF1	0	0	0	0	0	Crotalus-Sisturu Stratum & Colubridae Stratum	60.5	0
31230	CCNB1IP1	0	0	0	0	0	Crotalus-Sisturu Stratum & Colubridae Stratum	60.5	0
31231	TTC5	0	0	0	0	0	Crotalus-Sisturu Stratum & Colubridae Stratum	60.5	0
31232	NUTM1	0	0	0	0	0	Crotalus-Sisturu Stratum & Colubridae Stratum	60.5	0
31233	NOP10	0	0	0	0	0	Crotalus-Sisturu Stratum & Colubridae Stratum	60.5	0
31234	SLC12A6	0	0	0	0	0	Crotalus-Sisturu Stratum & Colubridae Stratum	60.5	0
31235	EMC4	0	0	0	0	0	Crotalus-Sisturu Stratum & Colubridae Stratum	60.5	0
31236	SDR39U1	0	0	0	48	48	Crotalus-Sisturu Stratum & Colubridae Stratum	60.5	0.793388
31237	NYNRIN	0	0	0	0	0	Crotalus-Sisturu Stratum & Colubridae Stratum	60.5	0
31238	KHNYN	0	0	0	0	0	Crotalus-Sisturu Stratum & Colubridae Stratum	60.5	0
