# Supplementary material for: Dosage-sensitive functions in embryonic development drove the survival of genes on sex-specific chromosomes in snakes, birds, and mammals
Source: HighWire-hosted journal article supplement (doi:10.1101/gr.268516.120), 2021-01-21
Supplement: Supplemental_Table_S19.xlsx [file Supplemental_Table_S19.xlsx]

## Sheet: Sheet1
Supplemental Table S19. Branch length and survival fraction calculations from four caenophidian species for RAB5A.
		Deinagkistrodon acutus to Deinagkistrodon-Sistrurus ancestor	Sistrurus miliarius to Deinagkistrodon-Sistrurus ancestor	Deinagkistrodon-Sistrurus ancestor to Deinagkistrodon-Thamnophis ancestor	Thamnophis elegans to Thamnophis-Elaphe ancestor	Elaphe quadrivirgata to garter Thamnophis-Elaphe ancestor	Thamnophis-Elaphe ancestor to Deinagkistrodon-Thamnophis ancestor
	Divergence (MY)	39	39	22.7	48	48	13.7
Strata	Branch Length	Deinagkistrodon acutus to Deinagkistrodon-Sistrurus ancestor	Sistrurus miliarius to Deinagkistrodon-Sistrurus ancestor	Deinagkistrodon-Sistrurus ancestor to Deinagkistrodon-Thamnophis ancestor	Thamnophis elegans to Thamnophis-Elaphe ancestor	Elaphe quadrivirgata to garter Thamnophis-Elaphe ancestor	Thamnophis-Elaphe ancestor to Deinagkistrodon-Thamnophis ancestor
Colubroidea Stratum	210.4	39	39	22.7	48	48	13.7
Number	Genes	Deinagkistrodon acutus to Deinagkistrodon-Sistrurus ancestor	Sistrurus miliarius to Deinagkistrodon-Sistrurus ancestor	Deinagkistrodon-Sistrurus ancestor to Deinagkistrodon-Thamnophis ancestor	Thamnophis elegans to Thamnophis-Elaphe ancestor	Elaphe quadrivirgata to garter Thamnophis-Elaphe ancestor	Thamnophis-Elaphe ancestor to Deinagkistrodon-Thamnophis ancestor	Branch Length	Strata	Max Branch Length	Survival Fraction
30354	RAB5A	0	0	0	0	48	13.7	61.7	Colubroidea Stratum	210.4	0.293251
