# Supplementary material for: Dosage-sensitive functions in embryonic development drove the survival of genes on sex-specific chromosomes in snakes, birds, and mammals
Source: HighWire-hosted journal article supplement (doi:10.1101/gr.268516.120), 2021-01-21
Supplement: Supplemental_Table_S20.xlsx [file Supplemental_Table_S20.xlsx]

## Sheet: Sheet1
Supplemental Table S20. Branch length and survival fraction calculations from six caenophidian species for WDR48, LSM12, COMMD3, and MSL1.
		Deinagkistrodon acutus to Deinagkistrodon-Sistrurus ancestor	Sistrurus miliarius to Sistrurus-Crotalus ancestor	Crotalus horridus to Sistrurus-Crotalus ancestor	Sistrurus-Crotalus ancestor to Deinagkistrodon-Sistrurus ancestor	Deinagkistrodon-Sistrurus ancestor to Deinagkistrodon-Thamnophis ancestor	Thamnophis elegans to elgans-sirtalis ancestor	Thamnophis sirtalis to elgans-sirtalis ancestor	elgans-sirtalis ancestor to Thamnophis-Pantherophis ancestor	Pantherophis guttatus to garter Thamnophis-Pantherophis ancestor	Thamnophis-Pantherophis ancestor to Deinagkistrodon-Thamnophis ancestor
	Divergence (MY)	39	12.5	12.5	26.5	22.7	9.9	9.9	38.1	48	13.7
Strata	Branch Length	Deinagkistrodon acutus to Deinagkistrodon-Sistrurus ancestor	Sistrurus miliarius to Sistrurus-Crotalus ancestor	Crotalus horridus to Sistrurus-Crotalus ancestor	Sistrurus-Crotalus ancestor to Deinagkistrodon-Sistrurus ancestor	Deinagkistrodon-Sistrurus ancestor to Deinagkistrodon-Thamnophis ancestor	Thamnophis elegans to elgans-sirtalis ancestor	Thamnophis sirtalis to elgans-sirtalis ancestor	elgans-sirtalis ancestor to Thamnophis-Pantherophis ancestor	Pantherophis guttatus to garter Thamnophis-Pantherophis ancestor	Thamnophis-Pantherophis ancestor to Deinagkistrodon-Thamnophis ancestor
Colubroidea Stratum	232.8	39	12.5	12.5	26.5	22.7	9.9	9.9	38.1	48	13.7
Number	Genes	Deinagkistrodon acutus to Deinagkistrodon-Sistrurus ancestor	Sistrurus miliarius to Sistrurus-Crotalus ancestor	Crotalus horridus to Sistrurus-Crotalus ancestor	Sistrurus-Crotalus ancestor to Deinagkistrodon-Sistrurus ancestor	Deinagkistrodon-Sistrurus ancestor to Deinagkistrodon-Thamnophis ancestor	Thamnophis elegans to elgans-sirtalis ancestor	Thamnophis sirtalis to elgans-sirtalis ancestor	elgans-sirtalis ancestor to Thamnophis-Pantherophis ancestor	Pantherophis guttatus to garter Thamnophis-Pantherophis ancestor	Thamnophis-Pantherophis ancestor to Deinagkistrodon-Thamnophis ancestor	Branch Length	Strata	Max Branch Length	Survival Fraction
30068	WDR48	0	12.5	12.5	26.5	22.7	9.9	9.9	38.1	48	13.7	193.8	Colubroidea Stratum	232.8	0.832474
30894	LSM12	0	12.5	12.5	26.5	22.7	9.9	9.9	38.1	48	13.7	193.8	Colubroidea Stratum	232.8	0.832474
30218	COMMD3	39	12.5	12.5	26.5	22.7	9.9	9.9	38.1	48	13.7	232.8	Colubroidea Stratum	232.8	1
30770	MSL1	39	12.5	12.5	26.5	22.7	9.9	9.9	38.1	48	13.7	232.8	Colubroidea Stratum	232.8	1
