# Supplementary material for: Dosage-sensitive functions in embryonic development drove the survival of genes on sex-specific chromosomes in snakes, birds, and mammals
Source: HighWire-hosted journal article supplement (doi:10.1101/gr.268516.120), 2021-01-21
Supplement: Supplemental_Table_S21.xlsx [file Supplemental_Table_S21.xlsx]

## Sheet: Sheet1
Supplemental Table S21. Branch length and survival fraction calculations from 13 caenophidian species for WAC and CTNNB1.
		Acrochordus arafurae to Acrochordus-Deinagkistrodon ancestor	Deinagkistrodon acutus to Deinagkistrodon-Sistrurus ancestor	Sistrurus miliarius to Sistrurus-Crotalus ancestor	Crotalus horridus to Sistrurus-Crotalus ancestor	Sistrurus-Crotalus ancestor to Sistrurus-Gloydius ancestor	Gloydius blomhoffii to Sistrurus-Gloydius ancestor	Sistrurus-Gloydius ancestor to Sistrurus-Protobothrops ancestor	Protobothrops flavoviridis Sistrurus-Protobothrops ancestor	Sistrurus-Protobothrops ancestor to Deinagkistrodon-Sistrurus ancestor	Deinagkistrodon-Sistrurus ancestor to Deinagkistrodon-Thamnophis ancestor	Thamnophis elegans to elgans-sirtalis ancestor	Thamnophis sirtalis to elgans-sirtalis ancestor	elgans-sirtalis ancestor to Thamnophis-Rhabdophis ancestor	Rhabdophis tigrinus tigrinus to Thamnophis-Rhabdophis ancestor	Thamnophis-Rhabdophis ancestor to Thamnophis-Pantherophis ancestor	Elaphe quadrivirgata to garter Elaphe-Pantherophis ancestor	Pantherophis guttatus to garter Elaphe-Pantherophis ancestor	Elaphe-Pantherophis ancestor to Elaphe-Lycodon ancestor	Lycodon semicarinatus to Elaphe-Lycodon ancestor	Elaphe-Lycodon ancestor to Thamnophis-Elaphe ancestor	Thamnophis-Elaphe ancestor to Thamnophis-Naja ancestor	Naja kaouthia to Thamnophis-Naja ancestor	Thamnophis-Elaphe ancestor to Deinagkistrodon-Thamnophis ancestor	Deinagkistrodon-Thamnophis ancestor to Acrochordus-Deinagkistrodon ancestor
	Divergence (MY)	76	39	12.5	12.5	6.3	18.8	10.7	29.5	9.5	22.7	9.9	9.9	31.1	41	7	23.5	23.5	16.5	40	8	3	51	10.7	14.3
Strata	Branch Length	Acrochordus arafurae to Acrochordus-Deinagkistrodon ancestor	Deinagkistrodon acutus to Deinagkistrodon-Sistrurus ancestor	Sistrurus miliarius to Sistrurus-Crotalus ancestor	Crotalus horridus to Sistrurus-Crotalus ancestor	Sistrurus-Crotalus ancestor to Sistrurus-Gloydius ancestor	Gloydius blomhoffii to Sistrurus-Gloydius ancestor	Sistrurus-Gloydius ancestor to Sistrurus-Protobothrops ancestor	Protobothrops flavoviridis Sistrurus-Protobothrops ancestor	Sistrurus-Protobothrops ancestor to Deinagkistrodon-Sistrurus ancestor	Deinagkistrodon-Sistrurus ancestor to Deinagkistrodon-Thamnophis ancestor	Thamnophis elegans to elgans-sirtalis ancestor	Thamnophis sirtalis to elgans-sirtalis ancestor	elgans-sirtalis ancestor to Thamnophis-Rhabdophis ancestor	Rhabdophis tigrinus tigrinus to Thamnophis-Rhabdophis ancestor	Thamnophis-Rhabdophis ancestor to Thamnophis-Pantherophis ancestor	Elaphe quadrivirgata to garter Elaphe-Pantherophis ancestor	Pantherophis guttatus to garter Elaphe-Pantherophis ancestor	Elaphe-Pantherophis ancestor to Elaphe-Lycodon ancestor	Lycodon semicarinatus to Elaphe-Lycodon ancestor	Elaphe-Lycodon ancestor to Thamnophis-Elaphe ancestor	Thamnophis-Elaphe ancestor to Thamnophis-Naja ancestor	Naja kaouthia to Thamnophis-Naja ancestor	Thamnophis-Elaphe ancestor to Deinagkistrodon-Thamnophis ancestor	Deinagkistrodon-Thamnophis ancestor to Acrochordus-Deinagkistrodon ancestor
Colubroidea Stratum	436.6	0	39	12.5	12.5	6.3	18.8	10.7	29.5	9.5	22.7	9.9	9.9	31.1	41	7	23.5	23.5	16.5	40	8	3	51	10.7	0
Acrochordidae Stratum	42	42	0	0	0	0	0	0	0	0	0	0	0	0	0	0	0	0	0	0	0	0	0	0	0
Number	Genes	Acrochordus arafurae to Acrochordus-Deinagkistrodon ancestor	Deinagkistrodon acutus to Deinagkistrodon-Sistrurus ancestor	Sistrurus miliarius to Sistrurus-Crotalus ancestor	Crotalus horridus to Sistrurus-Crotalus ancestor	Sistrurus-Crotalus ancestor to Sistrurus-Gloydius ancestor	Gloydius blomhoffii to Sistrurus-Gloydius ancestor	Sistrurus-Gloydius ancestor to Sistrurus-Protobothrops ancestor	Protobothrops flavoviridis Sistrurus-Protobothrops ancestor	Sistrurus-Protobothrops ancestor to Deinagkistrodon-Sistrurus ancestor	Deinagkistrodon-Sistrurus ancestor to Deinagkistrodon-Thamnophis ancestor	Thamnophis elegans to elgans-sirtalis ancestor	Thamnophis sirtalis to elgans-sirtalis ancestor	elgans-sirtalis ancestor to Thamnophis-Rhabdophis ancestor	Rhabdophis tigrinus tigrinus to Thamnophis-Rhabdophis ancestor	Thamnophis-Rhabdophis ancestor to Thamnophis-Pantherophis ancestor	Elaphe quadrivirgata to garter Elaphe-Pantherophis ancestor	Pantherophis guttatus to garter Elaphe-Pantherophis ancestor	Elaphe-Pantherophis ancestor to Elaphe-Lycodon ancestor	Lycodon semicarinatus to Elaphe-Lycodon ancestor	Elaphe-Lycodon ancestor to Thamnophis-Elaphe ancestor	Thamnophis-Elaphe ancestor to Thamnophis-Naja ancestor	Naja kaouthia to Thamnophis-Naja ancestor	Thamnophis-Elaphe ancestor to Deinagkistrodon-Thamnophis ancestor	Deinagkistrodon-Thamnophis ancestor to Acrochordus-Deinagkistrodon ancestor	Branch Length	Strata	Max Branch Length	Survival Fraction
30134	WAC	42	0	12.5	12.5	6.3	0	10.7	29.5	9.5	22.7	9.9	9.9	31.1	0	7	23.5	23.5	16.5	0	8	3	51	10.7	0	339.8	Colubroidea Stratum and Acrochordidae Stratum	478.6	0.709987
30449	CTNNB1	42	0	12.5	12.5	6.3	18.8	10.7	29.5	9.5	22.7	0	9.9	31.1	41	7	23.5	23.5	16.5	40	8	3	51	10.7	0	429.7	Colubroidea Stratum and Acrochordidae Stratum	478.6	0.897827
