# Supplementary material for: Dosage-sensitive functions in embryonic development drove the survival of genes on sex-specific chromosomes in snakes, birds, and mammals
Source: HighWire-hosted journal article supplement (doi:10.1101/gr.268516.120), 2021-01-21
Supplement: Supplemental_Table_S22.xlsx [file Supplemental_Table_S22.xlsx]

## Sheet: Sheet1
Supplemental Table S22. Branch length and survival fraction calculations from avian species.
		Struthio camelus to Struthio-Dromaius ancestor	Dromaius novaehollandiae to Struthio-Dromaius ancestor	Struthio-Dromaius ancestor to Struthio-Tinamus ancestor	Tinamus guttatus to Struthio-Tinamus ancestor	Struthio to Struthio-Anas ancestor	Anas platyrhynchos to Anas-Gallus ancestor	Meleagris gallopavo to Meleagris-Gallus ancestor	Gallus gallus to Meleagris-Gallus ancestor	Meleagris-Gallus ancestor to Anas-Gallus ancestor	Anas-Gallus ancestor to Anas-Calypte ancestor	Calypte anna to Calypte-Chaetura ancestor	Chaetura pelagica to Calypte-Chaetura ancestor	Calypte-Chaetura ancestor to Calypte-Mesitornis ancestor	Mesitornis unicolor to Mesitornis-Charadrius-Nipponia ancestor	Charadrius vociferus to Mesitornis-Charadrius-Nipponia ancestor	Nipponia nippon to Nipponia-Phaethon ancestor	Phaethon lepturus to Nipponia-Phaethon ancestor	Nipponia-Phaethon ancestor to Mesitornis-Charadrius-Nipponia ancestor	Mesitornis-Charadrius-Nipponia ancestor to Mesitornis-Tyto ancestor	Tyto alba to Tyto-Pseudopodoces ancestor	Pseudopodoces humilis to Pseudopodoces-Ficedula ancestor	Ficedula albicollis to Pseudopodoces-Ficedula ancestor	Pseudopodoces-Ficedula ancestor to Pseudopodoces-Passer-Corvus ancestor	Passer domesticus to Passer-Serinus ancestor	Serinus canaria to Passer-Serinus ancestor	Passer-Serinus ancestor to Passer-Geospiza ancestor	Geospiza fortis to Passer-Geospiza ancestor	Passer-Geospiza ancestor to Pseudopodoces-Passer-Corvus ancestor	Corvus brachyrhynchos to Corvus-Parotia ancestor	Parotia lawesii to Parotia-Paradisaea ancestor	Paradisaea raggiana to raggiana-rubra ancestor	Paradisaea rubra to raggiana-rubra ancestor	raggiana-rubra ancestor to Paradisaea-Cicinnurus ancestor	Cicinnurus regius to regius-magnificus ancestor	Cicinnurus magnificus to regius-magnificus ancestor	regius-magnificus ancestor to Paradisaea-Cicinnurus ancestor	Paradisaea-Cicinnurus ancestor to Parotia-Paradisaea ancestor	Parotia-Paradisaea ancestor to Corvus-Parotia ancestor	Corvus-Parotia ancestor to Pseudopodoces-Passer-Corvus ancestor	Pseudopodoces-Passer-Corvus ancestor to Tyto-Pseudopodoces ancestor	Tyto-Pseudopodoces ancestor to Mesitornis-Tyto ancestor	Mesitornis-Tyto ancestor to Calypte-Mesitornis ancestor	Calypte-Mesitornis ancestor to Anas-Calypte ancestor	Anas-Calypte ancestor to Struthio-Anas ancestor
	Divergence (MY)	90	90	3	93	18	77	37	37	40	21	57	57	28	81	81	79	79	2	2	82	43	43	1	35	35	3	38	6	40	13.7	3.34	3.34	6.46	7.2	7.2	2.6	3.9	26.3	4	38	1	2	13	13
Strata	Branch Length	Struthio camelus to Struthio-Dromaius ancestor	Dromaius novaehollandiae to Struthio-Dromaius ancestor	Struthio-Dromaius ancestor to Struthio-Tinamus ancestor	Tinamus guttatus to Struthio-Tinamus ancestor	Struthio to Struthio-Anas ancestor	Anas platyrhynchos to Anas-Gallus ancestor	Meleagris gallopavo to Meleagris-Gallus ancestor	Gallus gallus to Meleagris-Gallus ancestor	Meleagris-Gallus ancestor to Anas-Gallus ancestor	Anas-Gallus ancestor to Anas-Calypte ancestor	Calypte anna to Calypte-Chaetura ancestor	Chaetura pelagica to Calypte-Chaetura ancestor	Calypte-Chaetura ancestor to Calypte-Mesitornis ancestor	Mesitornis unicolor to Mesitornis-Charadrius-Nipponia ancestor	Charadrius vociferus to Mesitornis-Charadrius-Nipponia ancestor	Nipponia nippon to Nipponia-Phaethon ancestor	Phaethon lepturus to Nipponia-Phaethon ancestor	Nipponia-Phaethon ancestor to Mesitornis-Charadrius-Nipponia ancestor	Mesitornis-Charadrius-Nipponia ancestor to Mesitornis-Tyto ancestor	Tyto alba to Tyto-Pseudopodoces ancestor	Pseudopodoces humilis to Pseudopodoces-Ficedula ancestor	Ficedula albicollis to Pseudopodoces-Ficedula ancestor	Pseudopodoces-Ficedula ancestor to Pseudopodoces-Passer-Corvus ancestor	Passer domesticus to Passer-Serinus ancestor	Serinus canaria to Passer-Serinus ancestor	Passer-Serinus ancestor to Passer-Geospiza ancestor	Geospiza fortis to Passer-Geospiza ancestor	Passer-Geospiza ancestor to Pseudopodoces-Passer-Corvus ancestor	Corvus brachyrhynchos to Corvus-Parotia ancestor	Parotia lawesii to Parotia-Paradisaea ancestor	Paradisaea raggiana to raggiana-rubra ancestor	Paradisaea rubra to raggiana-rubra ancestor	raggiana-rubra ancestor to Paradisaea-Cicinnurus ancestor	Cicinnurus regius to regius-magnificus ancestor	Cicinnurus magnificus to regius-magnificus ancestor	regius-magnificus ancestor to Paradisaea-Cicinnurus ancestor	Paradisaea-Cicinnurus ancestor to Parotia-Paradisaea ancestor	Parotia-Paradisaea ancestor to Corvus-Parotia ancestor	Corvus-Parotia ancestor to Pseudopodoces-Passer-Corvus ancestor	Pseudopodoces-Passer-Corvus ancestor to Tyto-Pseudopodoces ancestor	Tyto-Pseudopodoces ancestor to Mesitornis-Tyto ancestor	Mesitornis-Tyto ancestor to Calypte-Mesitornis ancestor	Calypte-Mesitornis ancestor to Anas-Calypte ancestor	Anas-Calypte ancestor to Struthio-Anas ancestor
Avian Stratum 0	1443.04	90	90	3	93	18	77	37	37	40	21	57	57	28	81	81	79	79	2	2	82	43	43	1	35	35	3	38	6	40	13.7	3.34	3.34	6.46	7.2	7.2	2.6	3.9	26.3	4	38	1	2	13	13
Neognathae Stratum 1	1136.04	0	0	0	0	0	77	37	37	40	21	57	57	28	81	81	79	79	2	2	82	43	43	1	35	35	3	38	6	40	13.7	3.34	3.34	6.46	7.2	7.2	2.6	3.9	26.3	4	38	1	2	13	0
Ostrich Stratum 1	75	75	0	0	0	0	0	0	0	0	0	0	0	0	0	0	0	0	0	0	0	0	0	0	0	0	0	0	0	0	0	0	0	0	0	0	0	0	0	0	0	0	0	0	0
Emu Stratum 1	22.9	0	22.9	0	0	0	0	0	0	0	0	0	0	0	0	0	0	0	0	0	0	0	0	0	0	0	0	0	0	0	0	0	0	0	0	0	0	0	0	0	0	0	0	0	0
Tinamide Stratum 1	49.2	0	0	0	49.2	0	0	0	0	0	0	0	0	0	0	0	0	0	0	0	0	0	0	0	0	0	0	0	0	0	0	0	0	0	0	0	0	0	0	0	0	0	0	0	0
Tinamus Stratum 2	40.9	0	0	0	40.9	0	0	0	0	0	0	0	0	0	0	0	0	0	0	0	0	0	0	0	0	0	0	0	0	0	0	0	0	0	0	0	0	0	0	0	0	0	0	0	0
Duck Stratum 2	39	0	0	0	0	0	39	0	0	0	0	0	0	0	0	0	0	0	0	0	0	0	0	0	0	0	0	0	0	0	0	0	0	0	0	0	0	0	0	0	0	0	0	0	0
Galliform Stratum 2	74	0	0	0	0	0	0	37	37	0	0	0	0	0	0	0	0	0	0	0	0	0	0	0	0	0	0	0	0	0	0	0	0	0	0	0	0	0	0	0	0	0	0	0	0
Neoaves Stratum 2	911.04	0	0	0	0	0	0	0	0	0	0	57	57	28	81	81	79	79	2	2	82	43	43	1	35	35	3	38	6	40	13.7	3.34	3.34	6.46	7.2	7.2	2.6	3.9	26.3	4	38	1	2	0	0
Hummingbird Stratum 3	57	0	0	0	0	0	0	0	0	0	0	57	0	0	0	0	0	0	0	0	0	0	0	0	0	0	0	0	0	0	0	0	0	0	0	0	0	0	0	0	0	0	0	0	0
Swift Stratum 3	57	0	0	0	0	0	0	0	0	0	0	0	57	0	0	0	0	0	0	0	0	0	0	0	0	0	0	0	0	0	0	0	0	0	0	0	0	0	0	0	0	0	0	0	0
Mesite Stratum 3	47.4	0	0	0	0	0	0	0	0	0	0	0	0	0	47.4	0	0	0	0	0	0	0	0	0	0	0	0	0	0	0	0	0	0	0	0	0	0	0	0	0	0	0	0	0	0
Killdeer Stratum 3	45	0	0	0	0	0	0	0	0	0	0	0	0	0	0	45	0	0	0	0	0	0	0	0	0	0	0	0	0	0	0	0	0	0	0	0	0	0	0	0	0	0	0	0	0
Ibis Stratum 3	53	0	0	0	0	0	0	0	0	0	0	0	0	0	0	0	53	0	0	0	0	0	0	0	0	0	0	0	0	0	0	0	0	0	0	0	0	0	0	0	0	0	0	0	0
Barn Owl Stratum 3	49.6	0	0	0	0	0	0	0	0	0	0	0	0	0	0	0	0	0	0	0	49.6	0	0	0	0	0	0	0	0	0	0	0	0	0	0	0	0	0	0	0	0	0	0	0	0
Songbird Stratum 3	322.04	0	0	0	0	0	0	0	0	0	0	0	0	0	0	0	0	0	0	0	0	43	43	1	35	35	3	38	6	40	13.7	3.34	3.34	6.46	7.2	7.2	2.6	3.9	26.3	4	0	0	0	0	0
Number	Genes	Struthio camelus to Struthio-Dromaius ancestor	Dromaius novaehollandiae to Struthio-Dromaius ancestor	Struthio-Dromaius ancestor to Struthio-Tinamus ancestor	Tinamus guttatus to Struthio-Tinamus ancestor	Struthio to Struthio-Anas ancestor	Anas platyrhynchos to Anas-Gallus ancestor	Meleagris gallopavo to Meleagris-Gallus ancestor	Gallus gallus to Meleagris-Gallus ancestor	Meleagris-Gallus ancestor to Anas-Gallus ancestor	Anas-Gallus ancestor to Anas-Calypte ancestor	Calypte anna to Calypte-Chaetura ancestor	Chaetura pelagica to Calypte-Chaetura ancestor	Calypte-Chaetura ancestor to Calypte-Mesitornis ancestor	Mesitornis unicolor to Mesitornis-Charadrius-Nipponia ancestor	Charadrius vociferus to Mesitornis-Charadrius-Nipponia ancestor	Nipponia nippon to Nipponia-Phaethon ancestor	Phaethon lepturus to Nipponia-Phaethon ancestor	Nipponia-Phaethon ancestor to Mesitornis-Charadrius-Nipponia ancestor	Mesitornis-Charadrius-Nipponia ancestor to Mesitornis-Tyto ancestor	Tyto alba to Tyto-Pseudopodoces ancestor	Pseudopodoces humilis to Pseudopodoces-Ficedula ancestor	Ficedula albicollis to Pseudopodoces-Ficedula ancestor	Pseudopodoces-Ficedula ancestor to Pseudopodoces-Passer-Corvus ancestor	Passer domesticus to Passer-Serinus ancestor	Serinus canaria to Passer-Serinus ancestor	Passer-Serinus ancestor to Passer-Geospiza ancestor	Geospiza fortis to Passer-Geospiza ancestor	Passer-Geospiza ancestor to Pseudopodoces-Passer-Corvus ancestor	Corvus brachyrhynchos to Corvus-Parotia ancestor	Parotia lawesii to Parotia-Paradisaea ancestor	Paradisaea raggiana to raggiana-rubra ancestor	Paradisaea rubra to raggiana-rubra ancestor	raggiana-rubra ancestor to Paradisaea-Cicinnurus ancestor	Cicinnurus regius to regius-magnificus ancestor	Cicinnurus magnificus to regius-magnificus ancestor	regius-magnificus ancestor to Paradisaea-Cicinnurus ancestor	Paradisaea-Cicinnurus ancestor to Parotia-Paradisaea ancestor	Parotia-Paradisaea ancestor to Corvus-Parotia ancestor	Corvus-Parotia ancestor to Pseudopodoces-Passer-Corvus ancestor	Pseudopodoces-Passer-Corvus ancestor to Tyto-Pseudopodoces ancestor	Tyto-Pseudopodoces ancestor to Mesitornis-Tyto ancestor	Mesitornis-Tyto ancestor to Calypte-Mesitornis ancestor	Calypte-Mesitornis ancestor to Anas-Calypte ancestor	Anas-Calypte ancestor to Struthio-Anas ancestor	Branch Length	Strata	Max Branch Length	Survival Fraction
20001	LMAN1	0	0	0	0	0	0	0	0	0	0	0	0	0	0	0	0	0	0	0	0	0	0	0	0	0	0	0	0	0	0	0	0	0	0	0	0	0	0	0	0	0	0	0	0	0	Galliform Stratum 2	74	0
20002	CPLX4	0	0	0	0	0	0	0	0	0	0	0	0	0	0	0	0	0	0	0	0	0	0	0	0	0	0	0	0	0	0	0	0	0	0	0	0	0	0	0	0	0	0	0	0	0	Galliform Stratum 2	74	0
20003	RAX	0	0	0	0	0	0	0	0	0	0	0	0	0	0	0	0	0	0	0	0	0	0	0	0	0	0	0	0	0	0	0	0	0	0	0	0	0	0	0	0	0	0	0	0	0	Galliform Stratum 2	74	0
20004	GRP	0	0	0	0	0	0	0	0	0	0	0	0	0	0	0	0	0	0	0	0	0	0	0	0	0	0	0	0	0	0	0	0	0	0	0	0	0	0	0	0	0	0	0	0	0	Galliform Stratum 2	74	0
20005	SEC11C	0	0	0	0	0	0	0	0	0	0	0	0	0	0	0	0	0	0	0	0	0	0	0	0	0	0	0	0	0	0	0	0	0	0	0	0	0	0	0	0	0	0	0	0	0	Galliform Stratum 2	74	0
20006	ZNF532	0	0	0	0	0	0	0	37	0	0	0	0	0	0	0	0	0	0	0	0	0	0	0	0	0	0	0	0	0	0	0	0	0	0	0	0	0	0	0	0	0	0	0	0	37	Galliform Stratum 2	74	0.5
20007	MALT1	0	0	0	0	0	0	0	0	0	0	0	0	0	0	0	0	0	0	0	0	0	0	0	0	0	0	0	0	0	0	0	0	0	0	0	0	0	0	0	0	0	0	0	0	0	Galliform Stratum 2	74	0
20008	ALPK2	0	0	0	0	0	0	0	0	0	0	0	0	0	0	0	0	0	0	0	0	0	0	0	0	0	0	0	0	0	0	0	0	0	0	0	0	0	0	0	0	0	0	0	0	0	Galliform Stratum 2	74	0
20009	NEDD4L	0	0	0	0	0	0	0	37	0	0	0	0	0	0	0	0	0	0	0	0	0	0	0	0	0	0	0	0	0	0	0	0	0	0	0	0	0	0	0	0	0	0	0	0	37	Galliform Stratum 2	74	0.5
20010	ATP8B1	0	0	0	0	0	0	0	0	0	0	0	0	0	0	0	0	0	0	0	0	0	0	0	0	0	0	0	0	0	0	0	0	0	0	0	0	0	0	0	0	0	0	0	0	0	Galliform Stratum 2	74	0
20011	NARS1	0	0	0	0	0	0	0	0	0	0	0	0	0	0	0	0	0	0	0	0	0	0	0	0	0	0	0	0	0	0	0	0	0	0	0	0	0	0	0	0	0	0	0	0	0	Galliform Stratum 2	74	0
20012	FECH	0	0	0	0	0	0	0	0	0	0	0	0	0	0	0	0	0	0	0	0	0	0	0	0	0	0	0	0	0	0	0	0	0	0	0	0	0	0	0	0	0	0	0	0	0	Galliform Stratum 2	74	0
20013	ONECUT2	0	0	0	0	0	0	0	0	0	0	0	0	0	0	0	0	0	0	0	0	0	0	0	0	0	0	0	0	0	0	0	0	0	0	0	0	0	0	0	0	0	0	0	0	0	Galliform Stratum 2	74	0
20014	ST8SIA3	0	0	0	0	0	0	0	37	0	0	0	0	0	0	0	0	0	0	0	0	0	0	0	0	0	0	0	0	0	0	0	0	0	0	0	0	0	0	0	0	0	0	0	0	37	Galliform Stratum 2	74	0.5
20015	WDR7	0	0	0	0	0	0	0	0	0	0	0	0	0	0	0	0	0	0	0	0	0	0	0	0	0	0	0	0	0	0	0	0	0	0	0	0	0	0	0	0	0	0	0	0	0	Galliform Stratum 2	74	0
20016	TXNL1	0	0	0	0	0	0	0	37	0	0	0	0	0	0	0	0	0	0	0	0	0	0	0	0	0	0	0	0	0	0	0	0	0	0	0	0	0	0	0	0	0	0	0	0	37	Galliform Stratum 2	74	0.5
20017	TCF4	0	0	0	0	0	0	0	37	0	0	0	0	0	0	0	0	0	0	0	0	0	0	0	0	0	0	0	0	0	0	0	0	0	0	0	0	0	0	0	0	0	0	0	0	37	Galliform Stratum 2	74	0.5
20018	CCDC68	0	0	0	0	0	0	0	0	0	0	0	0	0	0	0	0	0	0	0	0	0	0	0	0	0	0	0	0	0	0	0	0	0	0	0	0	0	0	0	0	0	0	0	0	0	Galliform Stratum 2 & Hummingbird Stratum 3	131	0
20019	RAB27B	0	0	0	0	0	0	0	0	0	0	0	0	0	0	0	0	0	0	0	0	0	0	0	0	0	0	0	0	0	0	0	0	0	0	0	0	0	0	0	0	0	0	0	0	0	Galliform Stratum 2 & Hummingbird Stratum 3	131	0
20020	DYNAP	0	0	0	0	0	0	0	0	0	0	0	0	0	0	0	0	0	0	0	0	0	0	0	0	0	0	0	0	0	0	0	0	0	0	0	0	0	0	0	0	0	0	0	0	0	Galliform Stratum 2 & Hummingbird Stratum 3	131	0
20021	C18orf54	0	0	0	0	0	0	0	0	0	0	0	0	0	0	0	0	0	0	0	0	0	0	0	0	0	0	0	0	0	0	0	0	0	0	0	0	0	0	0	0	0	0	0	0	0	Galliform Stratum 2 & Hummingbird Stratum 3	131	0
20022	STARD6	0	0	0	0	0	0	0	0	0	0	0	0	0	0	0	0	0	0	0	0	0	0	0	0	0	0	0	0	0	0	0	0	0	0	0	0	0	0	0	0	0	0	0	0	0	Galliform Stratum 2 & Hummingbird Stratum 3	131	0
20023	POLI	0	0	0	0	0	0	0	0	0	0	0	0	0	0	0	0	0	0	0	0	0	0	0	0	0	0	0	0	0	0	0	0	0	0	0	0	0	0	0	0	0	0	0	0	0	Galliform Stratum 2 & Hummingbird Stratum 3	131	0
20024	MBD2	0	0	0	0	0	0	0	0	0	0	0	0	0	0	0	0	0	0	0	0	0	0	0	0	0	0	0	0	0	0	0	0	0	0	0	0	0	0	0	0	0	0	0	0	0	Galliform Stratum 2 & Hummingbird Stratum 3	131	0
20025	DCC	0	0	0	0	0	0	0	0	0	0	0	0	0	0	0	0	0	0	0	0	0	0	0	0	0	0	0	0	0	0	0	0	0	0	0	0	0	0	0	0	0	0	0	0	0	Galliform Stratum 2 & Hummingbird Stratum 3 & Barn Owl Stratum 3	180.6	0
20026	MEX3C	0	0	0	0	0	0	0	0	0	0	0	0	0	0	0	0	0	0	0	0	0	43	1	35	35	3	38	6	40	0	0	0	0	0	0	0	0	0	4	0	0	0	0	0	205	Galliform Stratum 2 & Hummingbird Stratum 3 & Barn Owl Stratum 3 & Tinamus Stratum 2 & Songbird Stratum 3	543.54	0.377157
20027	SMAD4	0	0	0	0	0	0	0	0	0	0	0	0	0	0	0	0	0	0	0	0	43	43	1	0	35	3	38	6	40	13.7	3.34	3.34	6.46	7.2	0	2.6	3.9	26.3	4	0	0	0	0	0	279.84	Galliform Stratum 2 & Hummingbird Stratum 3 & Barn Owl Stratum 3 & Tinamus Stratum 2 & Songbird Stratum 3	543.54	0.514847
20028	ELAC1	0	0	0	0	0	0	0	0	0	0	0	0	0	0	0	0	0	0	0	0	0	0	0	0	0	0	0	0	0	0	0	0	0	0	0	0	0	0	0	0	0	0	0	0	0	Galliform Stratum 2 & Hummingbird Stratum 3 & Barn Owl Stratum 3 & Tinamus Stratum 2 & Songbird Stratum 3	543.54	0
20029	ME2	0	0	0	0	0	0	0	0	0	0	0	0	0	0	0	0	0	0	0	0	0	0	0	0	0	0	0	0	0	13.7	3.34	3.34	6.46	0	7.2	2.6	3.9	26.3	4	0	0	0	0	0	70.84	Galliform Stratum 2 & Hummingbird Stratum 3 & Barn Owl Stratum 3 & Tinamus Stratum 2 & Songbird Stratum 3	543.54	0.130331
20030	MAPK4	0	0	0	0	0	0	0	0	0	0	0	0	0	0	0	0	0	0	0	0	0	0	0	0	0	0	0	0	0	13.7	3.34	3.34	6.46	7.2	7.2	2.6	3.9	26.3	4	0	0	0	0	0	78.04	Galliform Stratum 2 & Hummingbird Stratum 3 & Barn Owl Stratum 3 & Tinamus Stratum 2 & Songbird Stratum 3	543.54	0.143577
20031	SKA1	0	0	0	0	0	0	0	0	0	0	0	0	0	0	0	0	0	0	0	0	0	0	0	0	0	0	0	0	0	0	0	0	0	0	0	0	0	0	0	0	0	0	0	0	0	Galliform Stratum 2 & Hummingbird Stratum 3 & Barn Owl Stratum 3 & Tinamus Stratum 2 & Songbird Stratum 3	543.54	0
20032	CXXC1	0	0	0	0	0	0	0	0	0	0	0	0	0	0	0	0	0	0	0	0	0	0	0	0	0	0	0	0	0	0	0	0	0	0	0	0	0	0	0	0	0	0	0	0	0	Galliform Stratum 2 & Hummingbird Stratum 3 & Barn Owl Stratum 3 & Tinamus Stratum 2 & Songbird Stratum 3 & Mesite Stratum 3	590.94	0
20033	MBD1	0	0	0	0	0	0	0	0	0	0	0	0	0	0	0	0	0	0	0	0	0	0	0	0	0	0	0	0	0	0	0	0	0	0	0	0	0	0	0	0	0	0	0	0	0	Galliform Stratum 2 & Hummingbird Stratum 3 & Barn Owl Stratum 3 & Tinamus Stratum 2 & Songbird Stratum 3 & Mesite Stratum 3	590.94	0
20034	CFAP53	0	0	0	0	0	0	0	0	0	0	0	0	0	0	0	0	0	0	0	0	0	0	0	0	0	0	0	0	0	0	0	0	0	0	0	0	0	0	0	0	0	0	0	0	0	Galliform Stratum 2 & Hummingbird Stratum 3 & Barn Owl Stratum 3 & Tinamus Stratum 2 & Songbird Stratum 3 & Mesite Stratum 3	590.94	0
20035	MYO5B	0	0	0	0	0	0	0	0	0	0	0	0	0	0	0	0	0	0	0	0	0	0	0	0	0	0	0	0	0	0	0	0	0	0	0	0	0	0	0	0	0	0	0	0	0	Galliform Stratum 2 & Hummingbird Stratum 3 & Barn Owl Stratum 3 & Tinamus Stratum 2 & Songbird Stratum 3 & Mesite Stratum 3 & Swift Stratum 3	647.94	0
20036	ACAA2	0	0	0	0	0	0	0	0	0	0	0	0	0	0	0	0	0	0	0	0	0	0	0	0	0	0	0	0	0	0	0	0	0	0	0	0	0	0	0	0	0	0	0	0	0	Galliform Stratum 2 & Hummingbird Stratum 3 & Barn Owl Stratum 3 & Tinamus Stratum 2 & Songbird Stratum 3 & Mesite Stratum 3 & Swift Stratum 3	647.94	0
20037	LIPG	0	0	0	0	0	0	0	0	0	0	0	0	0	47.4	0	0	0	0	0	0	0	0	0	0	0	0	0	0	0	0	0	0	0	0	0	0	0	0	0	0	0	0	0	0	47.4	Galliform Stratum 2 & Hummingbird Stratum 3 & Barn Owl Stratum 3 & Tinamus Stratum 2 & Songbird Stratum 3 & Mesite Stratum 3 & Swift Stratum 3	647.94	0.0731549
20038	RPL17	0	0	0	0	0	0	0	37	0	0	57	0	0	0	0	0	0	0	0	49.6	0	0	0	35	0	3	0	6	40	13.7	3.34	3.34	6.46	7.2	7.2	2.6	3.9	26.3	4	0	0	0	0	0	305.64	Galliform Stratum 2 & Hummingbird Stratum 3 & Barn Owl Stratum 3 & Tinamus Stratum 2 & Songbird Stratum 3 & Mesite Stratum 3 & Swift Stratum 3	647.94	0.47171
20039	C18orf32	0	0	0	0	0	0	0	0	0	0	0	0	0	0	0	0	0	0	0	0	0	0	0	0	0	0	0	0	40	0	0	0	0	0	0	0	0	0	4	0	0	0	0	0	44	Galliform Stratum 2 & Hummingbird Stratum 3 & Barn Owl Stratum 3 & Tinamus Stratum 2 & Songbird Stratum 3 & Mesite Stratum 3 & Swift Stratum 3	647.94	0.0679075
20040	DYM	0	0	0	0	0	0	0	0	0	0	57	57	0	0	0	0	0	0	0	0	0	0	0	0	0	0	0	0	0	0	0	0	0	0	0	0	0	0	0	0	0	0	0	0	114	Galliform Stratum 2 & Hummingbird Stratum 3 & Barn Owl Stratum 3 & Tinamus Stratum 2 & Songbird Stratum 3 & Mesite Stratum 3 & Swift Stratum 3	647.94	0.175942
20041	SMAD7	0	0	0	40.9	0	0	0	37	0	0	0	57	0	0	0	0	0	0	0	0	0	43	1	35	35	3	38	6	40	13.7	3.34	0	6.46	7.2	7.2	2.6	3.9	26.3	4	0	0	0	0	0	410.6	Galliform Stratum 2 & Hummingbird Stratum 3 & Barn Owl Stratum 3 & Tinamus Stratum 2 & Songbird Stratum 3 & Mesite Stratum 3 & Swift Stratum 3	647.94	0.633701
20042	CTIF	0	0	0	0	0	0	0	37	0	0	0	0	0	0	0	0	0	0	0	49.6	0	43	1	0	0	0	0	0	40	13.7	3.34	3.34	6.46	7.2	7.2	2.6	3.9	26.3	4	0	0	0	0	0	248.64	Galliform Stratum 2 & Hummingbird Stratum 3 & Barn Owl Stratum 3 & Tinamus Stratum 2 & Songbird Stratum 3 & Mesite Stratum 3 & Swift Stratum 3 & Duck S2	686.94	0.361953
20043	ZBTB7C	0	0	0	0	0	0	0	0	0	0	57	0	0	0	0	0	0	0	0	0	0	0	0	0	0	0	0	0	0	0	0	0	0	0	0	0	0	0	0	0	0	0	0	0	57	Galliform Stratum 2 & Hummingbird Stratum 3 & Barn Owl Stratum 3 & Tinamus Stratum 2 & Songbird Stratum 3 & Mesite Stratum 3 & Swift Stratum 3 & Duck S2	686.94	0.0829767
20044	SMAD2	0	0	0	0	0	39	37	37	0	0	0	0	0	47.4	0	0	0	0	0	49.6	43	43	1	0	35	3	38	6	40	0	3.34	0	6.46	7.2	7.2	2.6	3.9	26.3	4	0	0	0	0	0	480	Galliform Stratum 2 & Hummingbird Stratum 3 & Barn Owl Stratum 3 & Tinamus Stratum 2 & Songbird Stratum 3 & Mesite Stratum 3 & Swift Stratum 3 & Duck S2	686.94	0.698751
20045	SKOR2	0	0	0	0	0	0	0	0	0	0	0	0	0	0	0	0	0	0	0	0	0	0	0	0	0	0	0	0	0	0	0	0	0	0	0	0	0	0	0	0	0	0	0	0	0	Galliform Stratum 2 & Hummingbird Stratum 3 & Barn Owl Stratum 3 & Tinamus Stratum 2 & Songbird Stratum 3 & Mesite Stratum 3 & Swift Stratum 3 & Duck S2 & Killdeer S3	731.94	0
20046	IER3IP1	0	0	0	0	0	0	0	0	0	0	0	0	0	47.4	0	0	0	0	0	0	0	0	0	0	0	0	0	0	0	0	0	0	0	0	0	0	0	0	0	0	0	0	0	0	47.4	Galliform Stratum 2 & Hummingbird Stratum 3 & Barn Owl Stratum 3 & Tinamus Stratum 2 & Songbird Stratum 3 & Mesite Stratum 3 & Swift Stratum 3 & Duck S2 & Killdeer S3	731.94	0.0647594
20047	HDHD2	0	0	0	0	0	0	0	0	0	0	0	0	0	0	0	0	0	0	0	0	0	0	0	0	0	0	0	0	0	0	0	0	0	0	0	0	0	0	0	0	0	0	0	0	0	Galliform Stratum 2 & Hummingbird Stratum 3 & Barn Owl Stratum 3 & Tinamus Stratum 2 & Songbird Stratum 3 & Mesite Stratum 3 & Swift Stratum 3 & Duck S2 & Killdeer S3	731.94	0
20048	KATNAL2	0	0	0	0	0	0	0	0	0	0	0	0	0	0	0	0	0	0	0	0	0	0	0	0	0	0	0	0	0	0	0	0	0	0	0	0	0	0	0	0	0	0	0	0	0	Galliform Stratum 2 & Hummingbird Stratum 3 & Barn Owl Stratum 3 & Tinamus Stratum 2 & Songbird Stratum 3 & Mesite Stratum 3 & Swift Stratum 3 & Duck S2 & Killdeer S3	731.94	0
20049	PIAS2	0	0	0	40.9	0	0	0	0	0	0	0	0	0	47.4	0	0	0	0	0	49.6	43	0	1	0	0	0	38	6	0	13.7	3.34	3.34	6.46	7.2	7.2	2.6	3.9	26.3	4	0	0	0	0	0	303.94	Galliform Stratum 2 & Hummingbird Stratum 3 & Barn Owl Stratum 3 & Tinamus Stratum 2 & Songbird Stratum 3 & Mesite Stratum 3 & Swift Stratum 3 & Duck S2 & Killdeer S3	731.94	0.415253
20050	ST8SIA5	0	0	0	0	0	0	0	0	0	0	0	0	0	0	0	0	0	0	0	0	0	0	0	0	0	0	0	0	0	0	0	0	0	0	0	0	0	0	0	0	0	0	0	0	0	Galliform Stratum 2 & Hummingbird Stratum 3 & Barn Owl Stratum 3 & Tinamus Stratum 2 & Songbird Stratum 3 & Mesite Stratum 3 & Swift Stratum 3 & Duck S2 & Killdeer S3	731.94	0
20051	LOXHD1	0	0	0	0	0	0	0	0	0	0	0	0	0	0	0	0	0	0	0	0	0	0	0	0	0	0	0	0	0	0	0	0	0	0	0	0	0	0	0	0	0	0	0	0	0	Galliform Stratum 2 & Hummingbird Stratum 3 & Barn Owl Stratum 3 & Tinamus Stratum 2 & Songbird Stratum 3 & Mesite Stratum 3 & Swift Stratum 3 & Duck S2 & Killdeer S3 & Ibis S3	784.94	0
20052	RNF165	0	0	0	40.9	0	0	0	0	0	0	0	0	0	47.4	0	0	0	0	0	0	0	0	0	0	0	0	0	0	0	0	0	0	0	0	0	0	0	0	0	0	0	0	0	0	88.3	Galliform Stratum 2 & Hummingbird Stratum 3 & Barn Owl Stratum 3 & Tinamus Stratum 2 & Songbird Stratum 3 & Mesite Stratum 3 & Swift Stratum 3 & Duck S2 & Killdeer S3 & Ibis S3	784.94	0.112493
20053	C18orf25	0	0	0	0	0	39	0	37	0	0	0	0	0	47.4	0	0	0	0	0	0	43	43	1	35	35	3	38	6	40	13.7	0	3.34	6.46	7.2	7.2	2.6	3.9	26.3	4	0	0	0	0	0	442.1	Galliform Stratum 2 & Hummingbird Stratum 3 & Barn Owl Stratum 3 & Tinamus Stratum 2 & Songbird Stratum 3 & Mesite Stratum 3 & Swift Stratum 3 & Duck S2 & Killdeer S3 & Ibis S3	784.94	0.563228
20054	HAUS1	0	0	0	0	0	0	0	0	0	0	0	0	0	0	0	0	0	0	0	0	0	0	0	0	0	0	0	0	0	0	0	0	0	0	0	0	0	0	0	0	0	0	0	0	0	Galliform Stratum 2 & Hummingbird Stratum 3 & Barn Owl Stratum 3 & Tinamus Stratum 2 & Songbird Stratum 3 & Mesite Stratum 3 & Swift Stratum 3 & Duck S2 & Killdeer S3 & Ibis S3	784.94	0
20055	ATP5F1A	0	0	0	0	0	0	37	37	0	0	0	0	0	0	0	0	0	0	0	0	43	43	1	35	35	3	38	6	40	13.7	3.34	0	6.46	7.2	7.2	2.6	3.9	26.3	4	0	0	0	0	0	392.7	Galliform Stratum 2 & Hummingbird Stratum 3 & Barn Owl Stratum 3 & Tinamus Stratum 2 & Songbird Stratum 3 & Mesite Stratum 3 & Swift Stratum 3 & Duck S2 & Killdeer S3 & Ibis S3	784.94	0.500293
20056	PSTPIP2	0	0	0	0	0	0	0	0	0	0	0	0	0	0	0	0	0	0	0	0	0	0	0	0	0	0	0	0	0	0	0	0	0	0	0	0	0	0	0	0	0	0	0	0	0	Galliform Stratum 2 & Hummingbird Stratum 3 & Barn Owl Stratum 3 & Tinamus Stratum 2 & Songbird Stratum 3 & Mesite Stratum 3 & Swift Stratum 3 & Duck S2 & Killdeer S3 & Ibis S3	784.94	0
20057	EPG5	0	0	0	0	0	0	0	0	0	0	0	0	0	0	0	0	0	0	0	0	0	0	0	0	0	0	0	0	0	0	0	0	0	0	0	0	0	0	0	0	0	0	0	0	0	Galliform Stratum 2 & Hummingbird Stratum 3 & Barn Owl Stratum 3 & Tinamus Stratum 2 & Songbird Stratum 3 & Mesite Stratum 3 & Swift Stratum 3 & Duck S2 & Killdeer S3 & Ibis S3	784.94	0
20058	SIGLEC15	0	0	0	0	0	0	0	0	0	0	0	0	0	0	0	0	0	0	0	0	0	0	0	0	0	0	0	0	0	0	0	0	0	0	0	0	0	0	0	0	0	0	0	0	0	Galliform Stratum 2 & Hummingbird Stratum 3 & Barn Owl Stratum 3 & Tinamus Stratum 2 & Songbird Stratum 3 & Mesite Stratum 3 & Swift Stratum 3 & Duck S2 & Killdeer S3 & Ibis S3	784.94	0
20059	SLC14A1	0	0	0	0	0	0	0	0	0	0	0	0	0	0	0	0	0	0	0	0	0	0	0	0	0	0	0	0	0	0	0	0	0	0	0	0	0	0	0	0	0	0	0	0	0	Galliform Stratum 2 & Hummingbird Stratum 3 & Barn Owl Stratum 3 & Tinamus Stratum 2 & Songbird Stratum 3 & Mesite Stratum 3 & Swift Stratum 3 & Duck S2 & Killdeer S3 & Ibis S3	784.94	0
20060	SETBP1	0	0	0	40.9	0	0	0	0	0	0	0	0	0	0	0	0	0	0	0	0	0	0	0	0	0	0	0	0	0	13.7	3.34	0	6.46	7.2	0	2.6	3.9	26.3	4	0	0	0	0	0	108.4	Galliform Stratum 2 & Hummingbird Stratum 3 & Barn Owl Stratum 3 & Tinamus Stratum 2 & Songbird Stratum 3 & Mesite Stratum 3 & Swift Stratum 3 & Duck S2 & Killdeer S3 & Ibis S3	784.94	0.1381
20061	SYT4	0	0	0	0	0	0	0	0	0	0	0	0	0	0	0	0	0	0	0	0	0	0	0	0	0	0	0	0	0	0	0	0	0	0	0	0	0	0	0	0	0	0	0	0	0	Galliform Stratum 2 & Hummingbird Stratum 3 & Barn Owl Stratum 3 & Tinamus Stratum 2 & Songbird Stratum 3 & Mesite Stratum 3 & Swift Stratum 3 & Duck S2 & Killdeer S3 & Ibis S3	784.94	0
20062	RIT2	0	0	0	0	0	0	0	0	0	0	0	0	0	0	0	0	0	0	0	0	0	0	0	0	0	0	0	0	0	0	0	0	0	0	0	0	0	0	0	0	0	0	0	0	0	Galliform Stratum 2 & Hummingbird Stratum 3 & Barn Owl Stratum 3 & Tinamus Stratum 2 & Songbird Stratum 3 & Mesite Stratum 3 & Swift Stratum 3 & Duck S2 & Killdeer S3 & Ibis S3	784.94	0
20063	PIK3C3	0	0	0	0	0	0	0	0	0	0	0	0	0	0	0	0	0	0	0	0	0	0	0	0	0	0	0	0	0	0	0	0	0	0	0	0	0	0	0	0	0	0	0	0	0	Galliform Stratum 2 & Hummingbird Stratum 3 & Barn Owl Stratum 3 & Tinamus Stratum 2 & Songbird Stratum 3 & Mesite Stratum 3 & Swift Stratum 3 & Duck S2 & Killdeer S3 & Ibis S3	784.94	0
20064	CELF4	0	0	0	0	0	0	0	0	0	0	0	0	0	0	0	0	0	0	0	0	0	0	0	0	0	0	0	0	0	0	0	0	0	0	0	0	0	0	0	0	0	0	0	0	0	Galliform Stratum 2 & Tinamus Stratum 2 & Duck S2 & Neoaves S2	1064.94	0
20065	KIAA1328	0	0	0	0	0	0	0	0	0	0	0	0	0	0	0	0	0	0	0	0	0	0	0	0	0	0	0	0	0	0	0	0	0	0	0	0	0	0	0	0	0	0	0	0	0	Galliform Stratum 2 & Tinamus Stratum 2 & Duck S2 & Neoaves S2	1064.94	0
20066	TPGS2	0	0	0	0	0	0	0	0	0	0	0	0	0	0	0	0	0	0	0	0	0	0	0	0	0	0	0	0	0	0	0	0	0	0	0	0	0	0	0	0	0	0	0	0	0	Galliform Stratum 2 & Tinamus Stratum 2 & Duck S2 & Neoaves S2	1064.94	0
20067	AQP7	0	0	0	0	0	0	0	0	0	0	0	0	0	0	0	0	79	2	2	0	0	0	0	0	0	0	0	0	0	0	0	0	0	0	0	0	0	0	0	0	0	2	0	0	85	Galliform Stratum 2 & Tinamus Stratum 2 & Duck S2 & Neoaves S2	1064.94	0.0798167
20068	AQP3	0	0	0	40.9	0	0	0	0	0	0	0	0	0	0	0	79	0	2	2	0	0	0	0	0	0	0	0	0	0	0	0	0	0	0	0	0	0	0	0	0	0	2	0	0	125.9	Galliform Stratum 2 & Tinamus Stratum 2 & Duck S2 & Neoaves S2	1064.94	0.118223
20069	NOL6	0	0	0	40.9	0	0	0	0	0	0	0	0	0	0	0	0	0	0	0	0	0	0	0	0	0	0	0	0	0	0	0	0	0	0	0	0	0	0	0	0	0	0	0	0	40.9	Galliform Stratum 2 & Tinamus Stratum 2 & Duck S2 & Neoaves S2	1064.94	0.0384059
20070	UBE2R2	0	0	0	0	0	39	0	37	0	0	0	0	0	0	0	0	0	0	0	0	43	0	1	35	0	3	38	6	40	13.7	3.34	0	6.46	7.2	0	2.6	3.9	26.3	4	38	1	2	0	0	350.5	Galliform Stratum 2 & Tinamus Stratum 2 & Duck S2 & Neoaves S2	1064.94	0.329127
20071	UBAP2	0	0	0	0	0	39	37	37	0	0	0	0	0	0	0	0	0	0	0	0	43	43	1	35	35	3	38	6	40	13.7	3.34	3.34	6.46	7.2	0	2.6	3.9	26.3	4	38	1	2	0	0	468.84	Galliform Stratum 2 & Tinamus Stratum 2 & Duck S2 & Neoaves S2	1064.94	0.44025
20072	IFNB1	0	0	0	0	0	0	0	0	0	0	0	0	0	0	0	0	0	0	0	0	0	0	0	0	0	0	0	0	0	0	0	0	0	0	0	0	0	0	0	0	0	0	0	0	0	Galliform Stratum 2 & Tinamus Stratum 2 & Duck S2 & Neoaves S2	1064.94	0
20073	IFNA1	0	0	0	0	0	0	0	0	0	0	0	0	0	0	0	0	0	0	0	0	0	0	0	0	0	0	0	0	0	0	0	0	0	0	0	0	0	0	0	0	0	0	0	0	0	Galliform Stratum 2 & Tinamus Stratum 2 & Duck S2 & Neoaves S2	1064.94	0
20074	DCAF12	0	0	0	0	0	0	0	0	0	0	0	0	0	0	81	0	79	2	2	0	43	43	1	35	35	3	38	6	40	0	3.34	3.34	6.46	7.2	7.2	2.6	3.9	26.3	4	38	1	2	0	0	513.34	Galliform Stratum 2 & Tinamus Stratum 2 & Duck S2 & Neoaves S2	1064.94	0.482037
20075	UBAP1	0	0	0	40.9	0	0	0	0	0	0	0	0	0	81	0	0	0	0	2	82	43	43	1	35	35	3	38	6	40	13.7	0	3.34	6.46	7.2	7.2	2.6	3.9	26.3	4	38	1	2	0	0	565.6	Galliform Stratum 2 & Tinamus Stratum 2 & Duck S2 & Neoaves S2	1064.94	0.53111
20076	KIF24	0	0	0	0	0	0	0	0	0	0	0	0	0	0	0	0	0	0	0	0	0	0	0	0	0	0	0	0	0	13.7	0	0	0	7.2	0	2.6	3.9	26.3	4	38	1	2	0	0	98.7	Galliform Stratum 2 & Tinamus Stratum 2 & Duck S2 & Neoaves S2	1064.94	0.0926813
20077	NUDT2	0	0	0	0	0	0	0	0	0	0	0	0	0	0	0	0	79	2	2	0	0	0	0	0	0	0	0	0	0	0	0	0	0	0	0	0	0	0	0	0	0	2	0	0	85	Galliform Stratum 2 & Tinamus Stratum 2 & Duck S2 & Neoaves S2	1064.94	0.0798167
20078	LOC427400	0	0	0	0	0	0	0	0	0	0	0	0	0	0	0	79	0	2	2	0	0	0	0	0	0	0	0	0	0	0	0	0	0	0	0	0	0	0	0	0	0	2	0	0	85	Galliform Stratum 2 & Tinamus Stratum 2 & Duck S2 & Neoaves S2	1064.94	0.0798167
20079	MYORG	0	0	0	0	0	0	0	0	0	0	0	0	0	0	0	0	0	0	0	0	0	0	0	0	0	0	0	0	0	0	0	0	0	0	0	0	0	0	0	0	0	0	0	0	0	Galliform Stratum 2 & Tinamus Stratum 2 & Duck S2 & Neoaves S2	1064.94	0
20080	C9orf24	0	0	0	0	0	0	0	0	0	0	0	0	0	0	0	0	0	0	0	0	0	0	0	0	0	0	0	0	0	0	0	0	0	0	0	0	0	0	0	0	0	0	0	0	0	Galliform Stratum 2 & Tinamus Stratum 2 & Duck S2 & Neoaves S2	1064.94	0
20081	FAM219A	0	0	0	0	0	39	0	0	0	0	0	0	0	81	81	0	0	0	2	0	43	43	1	35	35	3	0	6	40	0	3.34	0	6.46	0	7.2	2.6	3.9	26.3	4	38	1	2	0	0	503.8	Galliform Stratum 2 & Tinamus Stratum 2 & Duck S2 & Neoaves S2	1064.94	0.473078
20082	DNAI1	0	0	0	0	0	0	0	0	0	0	0	0	0	0	0	0	0	0	0	0	0	0	0	0	0	0	0	0	0	0	0	0	0	0	0	0	0	0	0	0	0	0	0	0	0	Galliform Stratum 2 & Tinamus Stratum 2 & Duck S2 & Neoaves S2	1064.94	0
20083	ENHO	0	0	0	0	0	0	0	0	0	0	0	0	0	0	0	0	0	0	0	0	0	0	0	0	0	0	0	0	0	0	0	0	0	0	0	0	0	0	0	0	0	0	0	0	0	Galliform Stratum 2 & Tinamus Stratum 2 & Duck S2 & Neoaves S2	1064.94	0
20084	RPP25L	0	0	0	0	0	39	0	0	0	0	0	0	0	0	0	0	0	0	0	0	0	0	0	0	0	0	0	0	0	0	0	0	0	0	0	0	0	0	0	0	0	0	0	0	39	Galliform Stratum 2 & Tinamus Stratum 2 & Duck S2 & Neoaves S2	1064.94	0.0366218
20085	DCTN3	0	0	0	40.9	0	0	0	0	0	0	0	0	0	0	0	0	79	2	2	0	0	0	0	0	0	0	0	0	0	0	0	0	0	0	0	0	0	0	0	0	0	2	0	0	125.9	Galliform Stratum 2 & Tinamus Stratum 2 & Duck S2 & Neoaves S2	1064.94	0.118223
20086	ARID3C	0	0	0	40.9	0	0	0	0	0	0	0	0	0	0	0	0	0	0	0	0	0	0	0	0	0	0	0	0	0	0	0	0	0	0	0	0	0	0	0	0	0	0	0	0	40.9	Galliform Stratum 2 & Tinamus Stratum 2 & Duck S2 & Neoaves S2	1064.94	0.0384059
20087	SIGMAR1	0	0	0	0	0	0	0	0	0	0	0	0	0	0	0	0	0	0	0	0	0	0	0	0	0	0	0	0	0	0	0	0	0	0	0	0	0	0	0	0	0	0	0	0	0	Galliform Stratum 2 & Tinamus Stratum 2 & Duck S2 & Neoaves S2	1064.94	0
20088	GALT	0	0	0	0	0	0	0	0	0	0	0	0	0	0	0	0	0	0	0	0	0	0	0	0	0	0	0	0	0	0	0	0	0	0	0	0	0	0	0	0	0	0	0	0	0	Galliform Stratum 2 & Tinamus Stratum 2 & Duck S2 & Neoaves S2	1064.94	0
20089	CNTFR	0	0	0	0	0	0	0	0	0	0	0	0	0	0	0	0	0	0	0	0	0	0	0	0	0	0	0	0	0	0	0	0	0	0	0	0	0	0	0	0	0	0	0	0	0	Galliform Stratum 2 & Tinamus Stratum 2 & Duck S2 & Neoaves S2	1064.94	0
20090	IL11RA	0	0	0	0	0	0	0	0	0	0	0	0	0	0	0	0	0	0	0	0	0	0	0	0	0	0	0	0	0	0	0	0	0	0	0	0	0	0	0	0	0	0	0	0	0	Galliform Stratum 2 & Tinamus Stratum 2 & Duck S2 & Neoaves S2	1064.94	0
20091	CCL19	0	0	0	0	0	0	0	0	0	0	0	0	0	0	0	0	0	0	0	0	0	0	0	0	0	0	0	0	0	0	0	0	0	0	0	0	0	0	0	0	0	0	0	0	0	Galliform Stratum 2 & Tinamus Stratum 2 & Duck S2 & Neoaves S2	1064.94	0
20092	CCL21	0	0	0	0	0	0	0	0	0	0	0	0	0	0	0	0	0	0	0	0	0	0	0	0	0	0	0	0	0	0	0	0	0	0	0	0	0	0	0	0	0	0	0	0	0	Galliform Stratum 2 & Tinamus Stratum 2 & Duck S2 & Neoaves S2	1064.94	0
20093	PHF24	0	0	0	0	0	0	0	0	0	0	0	0	0	0	0	0	0	0	0	0	0	0	0	0	0	0	0	0	0	0	0	0	0	0	0	0	0	0	0	0	0	0	0	0	0	Galliform Stratum 2 & Tinamus Stratum 2 & Duck S2 & Neoaves S2	1064.94	0
20094	DNAJB5	0	0	0	0	0	0	0	0	0	0	0	0	0	0	0	79	79	2	2	82	0	0	0	0	0	0	0	0	0	0	0	0	0	0	0	0	0	0	0	0	1	2	0	0	247	Galliform Stratum 2 & Tinamus Stratum 2 & Duck S2 & Neoaves S2	1064.94	0.231938
20095	VCP	0	0	0	0	0	39	37	37	0	0	0	0	0	0	0	0	0	0	0	0	43	43	1	35	35	3	38	6	40	13.7	3.34	3.34	6.46	7.2	7.2	2.6	3.9	26.3	4	38	1	2	0	0	476.04	Galliform Stratum 2 & Tinamus Stratum 2 & Duck S2 & Neoaves S2	1064.94	0.447011
20096	FANCG	0	0	0	0	0	0	0	0	0	0	0	0	0	0	0	0	0	0	0	0	0	0	0	0	0	0	0	0	0	0	0	0	0	0	0	0	0	0	0	0	0	0	0	0	0	Galliform Stratum 2 & Tinamus Stratum 2 & Duck S2 & Neoaves S2	1064.94	0
20097	PIGO	0	0	0	0	0	0	0	0	0	0	0	0	0	0	0	0	0	0	0	0	0	0	0	0	0	0	0	0	0	0	0	0	0	0	0	0	0	0	0	0	0	0	0	0	0	Galliform Stratum 2 & Tinamus Stratum 2 & Duck S2 & Neoaves S2	1064.94	0
20098	STOML2	0	0	0	0	0	0	0	0	0	0	0	0	0	0	0	0	0	0	0	0	0	0	0	0	0	0	0	0	0	0	0	0	0	0	0	0	0	0	0	0	0	0	0	0	0	Galliform Stratum 2 & Tinamus Stratum 2 & Duck S2 & Neoaves S2	1064.94	0
20099	FAM214B	0	0	0	40.9	0	0	0	0	0	0	0	0	0	0	0	0	0	0	0	82	0	0	0	0	0	0	0	0	0	13.7	0	3.34	6.46	7.2	7.2	2.6	3.9	26.3	4	38	1	2	0	0	238.6	Galliform Stratum 2 & Tinamus Stratum 2 & Duck S2 & Neoaves S2	1064.94	0.22405
20100	UNC13B	0	0	0	0	0	0	0	0	0	0	0	0	0	0	0	0	0	0	0	0	0	0	0	0	0	0	0	0	0	0	0	0	0	0	0	0	0	0	0	0	0	0	0	0	0	Galliform Stratum 2 & Tinamus Stratum 2 & Duck S2 & Neoaves S2	1064.94	0
20101	ATP8B4	0	0	0	0	0	0	0	0	0	0	0	0	0	0	0	0	0	0	0	0	0	0	0	0	0	0	0	0	0	0	0	0	0	0	0	0	0	0	0	0	0	0	0	0	0	Galliform Stratum 2 & Tinamus Stratum 2 & Duck S2 & Neoaves S2	1064.94	0
20102	RUSC2	0	0	0	0	0	0	0	0	0	0	0	0	0	0	0	0	79	2	2	0	0	0	0	0	0	0	0	0	0	0	0	0	0	0	0	0	0	0	0	0	0	2	0	0	85	Galliform Stratum 2 & Tinamus Stratum 2 & Duck S2 & Neoaves S2	1064.94	0.0798167
20103	LOC100858919	0	0	0	0	0	0	0	0	0	0	0	0	0	0	0	0	0	0	0	0	0	0	0	0	0	0	0	0	0	0	0	0	0	0	0	0	0	0	0	0	0	0	0	0	0	Galliform Stratum 2 & Tinamus Stratum 2 & Duck S2 & Neoaves S2	1064.94	0
20104	TESK1	0	0	0	0	0	0	0	0	0	0	0	0	0	0	0	0	0	0	0	0	0	0	0	0	0	0	0	0	0	0	0	0	0	0	0	0	0	0	0	0	0	0	0	0	0	Galliform Stratum 2 & Tinamus Stratum 2 & Duck S2 & Neoaves S2	1064.94	0
20105	CD72	0	0	0	0	0	0	0	0	0	0	0	0	0	0	0	0	0	0	0	0	0	0	0	0	0	0	0	0	0	0	0	0	0	0	0	0	0	0	0	0	0	0	0	0	0	Galliform Stratum 2 & Tinamus Stratum 2 & Duck S2 & Neoaves S2	1064.94	0
20106	UTF1	0	0	0	0	0	0	0	0	0	0	0	0	0	0	0	0	0	0	0	0	0	0	0	0	0	0	0	0	0	0	0	0	0	0	0	0	0	0	0	0	0	0	0	0	0	Galliform Stratum 2 & Tinamus Stratum 2 & Duck S2 & Neoaves S2	1064.94	0
20107	TMEM8B	0	0	0	0	0	0	0	0	0	0	0	0	0	0	0	0	0	0	0	0	0	0	0	0	0	0	0	0	0	0	0	0	0	0	0	0	0	0	0	0	0	0	0	0	0	Galliform Stratum 2 & Tinamus Stratum 2 & Duck S2 & Neoaves S2	1064.94	0
20108	TAF1C	0	0	0	0	0	0	0	0	0	0	0	0	0	0	0	0	0	0	0	0	0	0	0	0	0	0	0	0	0	0	0	0	0	0	0	0	0	0	0	0	0	0	0	0	0	Galliform Stratum 2 & Tinamus Stratum 2 & Duck S2 & Neoaves S2	1064.94	0
20109	HINT2	0	0	0	0	0	0	0	0	0	0	0	0	0	0	0	0	0	0	0	0	0	0	0	0	0	0	0	0	0	0	0	0	0	0	0	0	0	0	0	0	0	0	0	0	0	Galliform Stratum 2 & Tinamus Stratum 2 & Duck S2 & Neoaves S2	1064.94	0
20110	SPAG8	0	0	0	0	0	0	0	0	0	0	0	0	0	0	0	0	0	0	0	0	0	0	0	0	0	0	0	0	0	0	0	0	0	0	0	0	0	0	0	0	0	0	0	0	0	Galliform Stratum 2 & Tinamus Stratum 2 & Duck S2 & Neoaves S2	1064.94	0
20111	NPR2	0	0	0	0	0	0	0	0	0	0	0	0	0	0	0	0	0	0	0	0	0	0	0	0	0	0	0	0	0	0	0	0	0	0	0	0	0	0	0	0	0	0	0	0	0	Galliform Stratum 2 & Tinamus Stratum 2 & Duck S2 & Neoaves S2	1064.94	0
20112	MSMP	0	0	0	0	0	0	0	0	0	0	0	0	0	0	0	0	0	0	0	0	0	0	0	0	0	0	0	0	0	0	0	0	0	0	0	0	0	0	0	0	0	0	0	0	0	Galliform Stratum 2 & Tinamus Stratum 2 & Duck S2 & Neoaves S2	1064.94	0
20113	RGP1	0	0	0	0	0	0	0	0	0	0	0	0	0	0	0	0	0	0	0	0	0	0	0	0	0	0	0	0	0	0	0	0	0	0	0	0	0	0	0	0	0	0	0	0	0	Galliform Stratum 2 & Tinamus Stratum 2 & Duck S2 & Neoaves S2	1064.94	0
20114	GBA2	0	0	0	0	0	0	0	0	0	0	0	0	0	0	0	0	0	0	0	0	0	0	0	0	0	0	0	0	0	0	0	0	0	0	0	0	0	0	0	0	0	0	0	0	0	Galliform Stratum 2 & Tinamus Stratum 2 & Duck S2 & Neoaves S2	1064.94	0
20115	LOC769899	0	0	0	40.9	0	0	0	0	0	0	0	0	0	0	0	0	0	0	0	0	0	0	0	0	0	0	0	0	0	0	0	0	0	0	0	0	0	0	0	0	0	0	0	0	40.9	Galliform Stratum 2 & Tinamus Stratum 2 & Duck S2 & Neoaves S2	1064.94	0.0384059
20116	AVR2	0	0	0	0	0	0	0	0	0	0	0	0	0	0	0	0	0	0	0	0	0	0	0	0	0	0	0	0	0	0	0	0	0	0	0	0	0	0	0	0	0	0	0	0	0	Galliform Stratum 2 & Tinamus Stratum 2 & Duck S2 & Neoaves S2	1064.94	0
20117	CREB3	0	0	0	0	0	0	0	0	0	0	0	0	0	0	0	0	0	0	0	0	0	0	0	0	0	0	0	0	0	0	0	0	0	0	0	0	0	0	0	0	0	0	0	0	0	Galliform Stratum 2 & Tinamus Stratum 2 & Duck S2 & Neoaves S2	1064.94	0
20118	TLN1	0	0	0	0	0	0	0	0	0	0	0	0	0	0	0	0	0	0	0	0	0	0	0	0	0	0	0	0	0	0	0	0	0	0	0	0	0	0	0	0	0	0	0	0	0	Galliform Stratum 2 & Tinamus Stratum 2 & Duck S2 & Neoaves S2	1064.94	0
20119	TPM2	0	0	0	0	0	0	0	0	0	0	0	0	0	0	0	0	0	0	0	0	0	0	0	0	0	0	0	0	0	0	0	0	0	0	0	0	0	0	0	0	0	0	0	0	0	Galliform Stratum 2 & Tinamus Stratum 2 & Duck S2 & Neoaves S2	1064.94	0
20120	APH1A	0	0	0	0	0	0	0	0	0	0	0	0	0	0	0	0	0	0	0	0	0	0	0	0	0	0	0	0	0	0	0	0	0	0	0	0	0	0	0	0	0	0	0	0	0	Galliform Stratum 2 & Tinamus Stratum 2 & Duck S2 & Neoaves S2	1064.94	0
20121	CA9	0	0	0	0	0	0	0	0	0	0	0	0	0	0	0	0	0	0	0	0	0	0	0	0	0	0	0	0	0	0	0	0	0	0	0	0	0	0	0	0	0	0	0	0	0	Galliform Stratum 2 & Tinamus Stratum 2 & Duck S2 & Neoaves S2	1064.94	0
20122	ARHGEF39	0	0	0	0	0	0	0	0	0	0	0	0	0	0	0	0	0	0	0	0	0	0	0	0	0	0	0	0	0	0	0	0	0	0	0	0	0	0	0	0	0	0	0	0	0	Galliform Stratum 2 & Tinamus Stratum 2 & Duck S2 & Neoaves S2	1064.94	0
20123	MRPL17	0	0	0	0	0	0	0	0	0	0	0	0	0	0	0	0	0	0	0	0	0	0	0	0	0	0	0	0	0	0	0	0	0	0	0	0	0	0	0	0	0	0	0	0	0	Galliform Stratum 2 & Tinamus Stratum 2 & Duck S2 & Neoaves S2	1064.94	0
20124	CCBE1	0	0	0	0	0	0	0	0	0	0	0	0	0	0	0	0	79	2	2	0	0	0	0	0	0	0	0	0	0	0	0	0	0	0	0	0	0	0	0	0	0	2	0	0	85	Galliform Stratum 2 & Tinamus Stratum 2 & Duck S2 & Neoaves S2	1064.94	0.0798167
20125	PDZD2	0	0	0	0	0	0	0	0	0	0	0	0	0	0	0	0	0	0	0	0	0	0	0	0	0	0	0	0	0	0	0	0	0	0	0	0	0	0	0	0	0	0	0	0	0	Galliform Stratum 2 & Tinamus Stratum 2 & Duck S2 & Neoaves S2	1064.94	0
20126	GOLPH3	0	0	0	40.9	0	0	0	37	0	0	0	0	0	0	81	0	79	2	2	82	43	43	1	35	35	3	0	6	40	13.7	0	3.34	6.46	7.2	7.2	2.6	3.9	26.3	4	38	1	2	0	0	645.6	Galliform Stratum 2 & Tinamus Stratum 2 & Duck S2 & Neoaves S2	1064.94	0.606231
20127	MTMR12	0	0	0	0	0	0	0	0	0	0	0	0	0	0	0	79	0	2	2	0	0	0	0	0	0	0	0	0	0	0	0	0	0	0	0	0	0	0	0	0	0	2	0	0	85	Galliform Stratum 2 & Tinamus Stratum 2 & Duck S2 & Neoaves S2	1064.94	0.0798167
20128	ZFR	0	0	0	0	0	39	0	37	0	0	0	0	0	81	0	0	0	0	2	0	43	43	1	0	35	3	38	6	40	13.7	3.34	3.34	6.46	7.2	7.2	2.6	3.9	26.3	4	38	1	2	0	0	487.04	Galliform Stratum 2 & Tinamus Stratum 2 & Duck S2 & Neoaves S2	1064.94	0.45734
20129	SUB1	0	0	0	0	0	0	0	37	0	0	0	0	0	81	0	0	79	2	2	82	43	43	1	35	35	3	0	6	40	13.7	3.34	3.34	6.46	7.2	7.2	2.6	3.9	26.3	4	38	1	2	0	0	608.04	Galliform Stratum 2 & Tinamus Stratum 2 & Duck S2 & Neoaves S2	1064.94	0.570962
20130	NPR3	0	0	0	0	0	0	0	0	0	0	0	0	0	0	0	0	0	0	0	0	0	0	0	0	0	0	0	0	0	0	0	0	0	0	0	0	0	0	0	0	0	0	0	0	0	Galliform Stratum 2 & Tinamus Stratum 2 & Duck S2 & Neoaves S2	1064.94	0
20131	TARS1	0	0	0	0	0	0	0	0	0	0	0	0	0	0	0	0	0	0	0	0	0	0	0	0	0	0	0	0	0	0	0	0	0	0	0	0	0	0	0	0	0	0	0	0	0	Galliform Stratum 2 & Tinamus Stratum 2 & Duck S2 & Neoaves S2	1064.94	0
20132	ADAMTS12	0	0	0	0	0	0	0	0	0	0	0	0	0	0	0	79	0	2	2	0	0	0	0	0	0	0	0	0	0	0	0	0	0	0	0	0	0	0	0	0	0	2	0	0	85	Galliform Stratum 2 & Tinamus Stratum 2 & Duck S2 & Neoaves S2	1064.94	0.0798167
20133	RXFP3	0	0	0	0	0	0	0	0	0	0	0	0	0	0	0	0	0	0	0	0	0	0	0	0	0	0	0	0	0	0	0	0	0	0	0	0	0	0	0	0	0	0	0	0	0	Galliform Stratum 2 & Tinamus Stratum 2 & Duck S2 & Neoaves S2	1064.94	0
20134	SLC45A2	0	0	0	0	0	0	0	0	0	0	0	0	0	0	0	0	0	0	0	0	0	0	0	0	0	0	0	0	0	0	0	0	0	0	0	0	0	0	0	0	0	0	0	0	0	Galliform Stratum 2 & Tinamus Stratum 2 & Duck S2 & Neoaves S2	1064.94	0
20135	AMACR	0	0	0	0	0	0	0	0	0	0	0	0	0	0	0	0	0	0	0	0	0	0	0	0	0	0	0	0	0	0	0	0	0	0	0	0	0	0	0	0	0	0	0	0	0	Galliform Stratum 2 & Tinamus Stratum 2 & Duck S2 & Neoaves S2	1064.94	0
20136	C1QTNF3	0	0	0	40.9	0	0	0	0	0	0	0	0	0	0	0	0	0	0	0	0	0	0	0	0	0	0	0	0	0	0	0	0	0	0	0	0	0	0	0	0	0	0	0	0	40.9	Galliform Stratum 2 & Tinamus Stratum 2 & Duck S2 & Neoaves S2	1064.94	0.0384059
20137	RAI14	0	0	0	40.9	0	0	0	0	0	0	0	0	0	0	0	0	0	0	0	0	0	0	0	0	0	0	0	0	0	0	0	0	0	0	0	0	0	0	0	0	0	0	0	0	40.9	Galliform Stratum 2 & Tinamus Stratum 2 & Duck S2 & Neoaves S2	1064.94	0.0384059
20138	TTC23L	0	0	0	0	0	0	0	0	0	0	0	0	0	0	0	0	0	0	0	0	0	0	0	0	0	0	0	0	0	0	0	0	0	0	0	0	0	0	0	0	0	0	0	0	0	Galliform Stratum 2 & Tinamus Stratum 2 & Duck S2 & Neoaves S2	1064.94	0
20139	RAD1	0	0	0	0	0	0	0	0	0	0	0	0	0	0	0	0	0	0	0	0	0	0	0	0	0	0	0	0	0	0	0	0	0	0	0	0	0	0	0	0	0	0	0	0	0	Galliform Stratum 2 & Tinamus Stratum 2 & Duck S2 & Neoaves S2	1064.94	0
20140	BRIX1	0	0	0	0	0	0	0	0	0	0	0	0	0	0	0	0	0	0	0	0	0	0	0	0	0	0	0	0	0	0	0	0	0	0	0	0	0	0	0	0	0	0	0	0	0	Galliform Stratum 2 & Tinamus Stratum 2 & Duck S2 & Neoaves S2	1064.94	0
20141	DNAJC21	0	0	0	0	0	0	0	0	0	0	0	0	0	0	0	0	0	0	0	0	0	0	0	0	0	0	0	0	0	0	0	0	0	0	0	0	0	0	0	0	0	0	0	0	0	Galliform Stratum 2 & Tinamus Stratum 2 & Duck S2 & Neoaves S2	1064.94	0
20142	AGXT2	0	0	0	0	0	0	0	0	0	0	0	0	0	0	0	0	0	0	0	0	0	0	0	0	0	0	0	0	0	0	0	0	0	0	0	0	0	0	0	0	0	0	0	0	0	Galliform Stratum 2 & Tinamus Stratum 2 & Duck S2 & Neoaves S2	1064.94	0
20143	PRLR	0	0	0	0	0	0	0	0	0	0	0	0	0	0	0	0	0	0	0	0	0	0	0	0	0	0	0	0	0	0	0	0	0	0	0	0	0	0	0	0	0	0	0	0	0	Galliform Stratum 2 & Tinamus Stratum 2 & Duck S2 & Neoaves S2	1064.94	0
20144	SPEF2	0	0	0	0	0	0	0	0	0	0	0	0	0	0	0	0	0	0	0	0	0	0	0	0	0	0	0	0	0	0	0	0	0	0	0	0	0	0	0	0	0	0	0	0	0	Galliform Stratum 2 & Tinamus Stratum 2 & Duck S2 & Neoaves S2	1064.94	0
20145	IL7R	0	0	0	0	0	0	0	0	0	0	0	0	0	0	0	0	0	0	0	0	0	0	0	0	0	0	0	0	0	0	0	0	0	0	0	0	0	0	0	0	0	0	0	0	0	Galliform Stratum 2 & Tinamus Stratum 2 & Duck S2 & Neoaves S2	1064.94	0
20146	CAPSL	0	0	0	0	0	0	0	0	0	0	0	0	0	0	0	0	0	0	0	0	0	0	0	0	0	0	0	0	0	0	0	0	0	0	0	0	0	0	0	0	0	0	0	0	0	Galliform Stratum 2 & Tinamus Stratum 2 & Duck S2 & Neoaves S2	1064.94	0
20147	LMBRD2	0	0	0	0	0	0	0	0	0	0	0	0	0	0	0	0	0	0	0	0	0	0	0	0	0	0	0	0	0	0	0	0	0	0	0	0	0	0	0	0	0	0	0	0	0	Galliform Stratum 2 & Tinamus Stratum 2 & Duck S2 & Neoaves S2	1064.94	0
20148	SKP2	0	0	0	0	0	0	0	0	0	0	0	0	0	0	0	0	0	0	0	0	0	0	0	0	0	0	0	0	0	0	0	0	0	0	0	0	0	0	0	0	0	0	0	0	0	Galliform Stratum 2 & Tinamus Stratum 2 & Duck S2 & Neoaves S2	1064.94	0
20149	NADK2	0	0	0	40.9	0	0	0	0	0	0	0	0	0	0	0	0	0	0	0	0	0	0	0	0	0	0	0	0	0	0	0	0	0	0	0	0	0	0	0	0	0	0	0	0	40.9	Galliform Stratum 2 & Tinamus Stratum 2 & Duck S2 & Neoaves S2	1064.94	0.0384059
20150	RANBP3L	0	0	0	40.9	0	0	0	0	0	0	0	0	0	0	0	0	0	0	0	0	0	0	0	0	0	0	0	0	0	0	0	0	0	0	0	0	0	0	0	0	0	0	0	0	40.9	Galliform Stratum 2 & Tinamus Stratum 2 & Duck S2 & Neoaves S2	1064.94	0.0384059
20151	SLC1A3	0	0	0	40.9	0	0	0	0	0	0	0	0	0	0	0	79	0	2	2	0	0	0	0	0	0	0	0	0	0	0	0	0	0	0	0	0	0	0	0	0	0	2	0	0	125.9	Galliform Stratum 2 & Tinamus Stratum 2 & Duck S2 & Neoaves S2	1064.94	0.118223
20152	NIPBL	0	0	0	0	0	39	37	37	0	0	0	57	28	81	81	79	0	2	2	82	43	43	1	35	35	3	38	6	40	13.7	3.34	3.34	6.46	7.2	7.2	2.6	3.9	26.3	4	38	1	2	0	0	888.04	Galliform Stratum 2 & Tinamus Stratum 2 & Duck S2 & Neoaves S2	1064.94	0.833887
20153	CPLANE1	0	0	0	40.9	0	0	0	0	0	0	0	0	0	0	0	79	0	2	2	0	0	0	0	0	0	0	0	0	0	0	0	0	0	0	0	0	0	0	0	0	0	2	0	0	125.9	Galliform Stratum 2 & Tinamus Stratum 2 & Duck S2 & Neoaves S2	1064.94	0.118223
20154	NUP155	0	0	0	0	0	0	0	0	0	0	0	0	0	0	0	0	0	0	0	0	0	0	0	0	0	0	0	0	0	0	0	0	0	0	0	0	0	0	0	0	0	0	0	0	0	Galliform Stratum 2 & Tinamus Stratum 2 & Duck S2 & Neoaves S2	1064.94	0
20155	WDR70	0	0	0	0	0	0	0	0	0	0	0	0	0	0	0	0	0	0	0	0	0	0	0	0	0	0	0	0	0	0	0	0	0	0	0	0	0	0	0	0	0	0	0	0	0	Galliform Stratum 2 & Tinamus Stratum 2 & Duck S2 & Neoaves S2	1064.94	0
20156	GDNF	0	0	0	0	0	0	0	0	0	0	0	0	0	0	0	0	79	2	2	0	0	0	0	0	0	0	0	0	0	0	0	0	0	0	0	0	0	0	0	0	0	2	0	0	85	Galliform Stratum 2 & Tinamus Stratum 2 & Duck S2 & Neoaves S2	1064.94	0.0798167
20157	EGFLAM	0	0	0	40.9	0	0	0	0	0	0	0	0	0	0	0	0	0	0	0	0	0	0	0	0	0	0	0	0	0	0	0	0	0	0	0	0	0	0	0	0	0	0	0	0	40.9	Galliform Stratum 2 & Tinamus Stratum 2 & Duck S2 & Neoaves S2	1064.94	0.0384059
20158	LIFR	0	0	0	40.9	0	0	0	0	0	0	0	0	0	0	0	0	0	0	0	0	0	0	0	0	0	0	0	0	0	0	0	0	0	0	0	0	0	0	0	0	0	0	0	0	40.9	Galliform Stratum 2 & Tinamus Stratum 2 & Duck S2 & Neoaves S2	1064.94	0.0384059
20159	OSMR	0	0	0	0	0	0	0	0	0	0	0	0	0	0	0	0	0	0	0	0	0	0	0	0	0	0	0	0	0	0	0	0	0	0	0	0	0	0	0	0	0	0	0	0	0	Galliform Stratum 2 & Tinamus Stratum 2 & Duck S2 & Neoaves S2	1064.94	0
20160	RICTOR	0	0	0	0	0	0	0	0	0	0	0	0	0	0	81	0	0	0	2	0	0	0	0	0	0	0	0	0	0	0	0	0	0	0	7.2	2.6	3.9	26.3	4	38	1	2	0	0	168	Galliform Stratum 2 & Tinamus Stratum 2 & Duck S2 & Neoaves S2	1064.94	0.157755
20161	FYB1	0	0	0	0	0	0	0	0	0	0	0	0	0	0	0	0	0	0	0	0	0	0	0	0	0	0	0	0	0	0	0	0	0	0	0	0	0	0	0	0	0	0	0	0	0	Galliform Stratum 2 & Tinamus Stratum 2 & Duck S2 & Neoaves S2	1064.94	0
20162	C9	0	0	0	0	0	0	0	0	0	0	0	0	0	0	0	0	0	0	0	0	0	0	0	0	0	0	0	0	0	0	0	0	0	0	0	0	0	0	0	0	0	0	0	0	0	Galliform Stratum 2 & Tinamus Stratum 2 & Duck S2 & Neoaves S2	1064.94	0
20163	DAB2	0	0	0	0	0	0	0	0	0	0	0	0	0	0	0	0	79	2	2	0	0	0	0	0	0	0	0	0	0	0	0	0	0	0	0	0	0	0	0	0	0	2	0	0	85	Galliform Stratum 2 & Tinamus Stratum 2 & Duck S2 & Neoaves S2	1064.94	0.0798167
20164	PTGER4	0	0	0	40.9	0	0	0	0	0	0	0	0	0	0	0	0	0	0	0	0	0	0	0	0	0	0	0	0	0	0	0	0	0	0	0	0	0	0	0	0	0	0	0	0	40.9	Galliform Stratum 2 & Tinamus Stratum 2 & Duck S2 & Neoaves S2	1064.94	0.0384059
20165	TTC33	0	0	0	0	0	0	0	0	0	0	0	0	0	0	0	0	0	0	0	0	0	0	0	0	0	0	0	0	0	0	0	0	0	0	0	0	0	0	0	0	0	0	0	0	0	Galliform Stratum 2 & Tinamus Stratum 2 & Duck S2 & Neoaves S2	1064.94	0
20166	PRKAA1	0	0	0	40.9	0	0	0	0	0	0	0	0	0	0	0	79	0	2	2	0	43	43	1	0	35	3	38	6	40	13.7	3.34	3.34	6.46	7.2	7.2	2.6	3.9	26.3	4	38	1	2	0	0	451.94	Galliform Stratum 2 & Tinamus Stratum 2 & Duck S2 & Neoaves S2	1064.94	0.424381
20167	RPL37	0	0	0	40.9	0	0	0	0	0	0	0	0	0	0	0	79	79	2	2	0	43	43	1	35	35	3	38	6	40	13.7	3.34	3.34	6.46	7.2	7.2	2.6	3.9	26.3	4	38	1	2	0	0	565.94	Galliform Stratum 2 & Tinamus Stratum 2 & Duck S2 & Neoaves S2	1064.94	0.531429
20168	C7	0	0	0	0	0	0	0	0	0	0	0	0	0	0	0	0	0	0	0	0	0	0	0	0	0	0	0	0	0	0	0	0	0	0	0	0	0	0	0	0	0	0	0	0	0	Galliform Stratum 2 & Tinamus Stratum 2 & Duck S2 & Neoaves S2	1064.94	0
20169	C6	0	0	0	0	0	0	0	0	0	0	0	0	0	0	0	0	79	2	2	0	0	0	0	0	0	0	0	0	0	0	0	0	0	0	0	0	0	0	0	0	0	2	0	0	85	Galliform Stratum 2 & Tinamus Stratum 2 & Duck S2 & Neoaves S2	1064.94	0.0798167
20170	PLCXD3	0	0	0	0	0	0	0	0	0	0	0	0	0	0	0	0	0	0	0	0	0	0	0	0	0	0	0	0	0	0	0	0	0	0	0	0	0	0	0	0	0	0	0	0	0	Galliform Stratum 2 & Tinamus Stratum 2 & Duck S2 & Neoaves S2	1064.94	0
20171	OXCT1	0	0	0	0	0	0	0	0	0	0	0	0	0	0	0	0	0	0	0	0	0	0	0	0	0	0	0	0	0	0	0	0	0	0	0	0	0	0	0	0	0	0	0	0	0	Galliform Stratum 2 & Tinamus Stratum 2 & Duck S2 & Neoaves S2	1064.94	0
20172	C5orf51	0	0	0	0	0	0	0	0	0	0	0	0	0	0	0	0	0	0	0	0	0	0	0	0	0	0	0	0	0	0	0	0	0	0	0	0	0	0	0	0	0	0	0	0	0	Galliform Stratum 2 & Tinamus Stratum 2 & Duck S2 & Neoaves S2	1064.94	0
20173	FBXO4	0	0	0	0	0	0	0	0	0	0	0	0	0	0	0	0	0	0	0	0	0	0	0	0	0	0	0	0	0	0	0	0	0	0	0	0	0	0	0	0	0	0	0	0	0	Galliform Stratum 2 & Tinamus Stratum 2 & Duck S2 & Neoaves S2	1064.94	0
20174	GHR	0	0	0	0	0	0	0	0	0	0	0	0	0	0	0	79	0	2	2	0	0	0	0	0	0	0	0	0	0	0	0	0	0	0	0	0	0	0	0	0	0	2	0	0	85	Galliform Stratum 2 & Tinamus Stratum 2 & Duck S2 & Neoaves S2	1064.94	0.0798167
20175	CCDC152	0	0	0	0	0	0	0	0	0	0	0	0	0	0	0	0	0	0	0	0	0	0	0	0	0	0	0	0	0	0	0	0	0	0	0	0	0	0	0	0	0	0	0	0	0	Galliform Stratum 2 & Tinamus Stratum 2 & Duck S2 & Neoaves S2	1064.94	0
20176	SELENOP	0	0	0	0	0	0	0	0	0	0	0	0	0	0	0	79	0	2	2	0	0	0	0	0	0	0	0	0	0	0	0	0	0	0	0	0	0	0	0	0	0	2	0	0	85	Galliform Stratum 2 & Tinamus Stratum 2 & Duck S2 & Neoaves S2	1064.94	0.0798167
20177	ZNF131	0	0	0	0	0	39	0	0	0	0	0	0	0	0	0	0	79	2	2	82	43	43	1	35	35	3	38	6	40	13.7	3.34	3.34	6.46	7.2	7.2	2.6	3.9	26.3	4	38	1	2	0	0	567.04	Galliform Stratum 2 & Tinamus Stratum 2 & Duck S2 & Neoaves S2	1064.94	0.532462
20178	NIM1K	0	0	0	0	0	0	0	0	0	0	0	0	0	0	0	0	0	0	0	0	0	0	0	0	0	0	0	0	0	0	0	0	0	0	0	0	0	0	0	0	0	0	0	0	0	Galliform Stratum 2 & Tinamus Stratum 2 & Duck S2 & Neoaves S2	1064.94	0
20179	HMGCS1	0	0	0	40.9	0	0	0	0	0	0	0	0	0	0	0	0	79	2	2	0	0	0	0	0	0	0	0	0	0	0	3.34	3.34	6.46	0	0	0	3.9	26.3	4	38	1	2	0	0	212.24	Galliform Stratum 2 & Tinamus Stratum 2 & Duck S2 & Neoaves S2	1064.94	0.199298
20180	TMEM267	0	0	0	0	0	0	0	0	0	0	0	0	0	0	0	0	0	0	0	0	0	0	0	0	0	0	0	0	0	0	0	0	0	0	0	0	0	0	0	0	0	0	0	0	0	Galliform Stratum 2 & Tinamus Stratum 2 & Duck S2 & Neoaves S2	1064.94	0
20181	C5orf34	0	0	0	0	0	0	0	0	0	0	0	0	0	0	0	0	0	0	0	0	0	0	0	0	0	0	0	0	0	0	0	0	0	0	0	0	0	0	0	0	0	0	0	0	0	Galliform Stratum 2 & Tinamus Stratum 2 & Duck S2 & Neoaves S2	1064.94	0
20182	PAIP1	0	0	0	0	0	0	0	0	0	0	0	0	0	0	0	0	0	0	0	0	43	0	1	0	35	3	38	6	0	13.7	3.34	3.34	6.46	7.2	7.2	2.6	3.9	26.3	4	38	1	2	0	0	245.04	Galliform Stratum 2 & Tinamus Stratum 2 & Duck S2 & Neoaves S2	1064.94	0.230097
20183	NNT	0	0	0	0	0	0	0	0	0	0	0	0	0	0	0	0	0	0	0	0	0	0	0	0	0	0	0	0	0	0	0	0	0	0	0	0	0	0	0	0	0	0	0	0	0	Galliform Stratum 2 & Tinamus Stratum 2 & Duck S2 & Neoaves S2	1064.94	0
20184	FGF10	0	0	0	0	0	0	0	0	0	0	0	0	0	0	0	0	0	0	0	0	0	0	0	0	0	0	0	0	0	0	0	0	0	0	0	0	0	0	0	0	0	0	0	0	0	Galliform Stratum 2 & Tinamus Stratum 2 & Duck S2 & Neoaves S2	1064.94	0
20185	MRPS30	0	0	0	0	0	0	0	0	0	0	0	0	0	0	0	0	0	0	0	0	0	0	0	0	0	0	0	0	0	0	0	0	0	0	0	0	0	0	0	0	0	0	0	0	0	Galliform Stratum 2 & Tinamus Stratum 2 & Duck S2 & Neoaves S2	1064.94	0
20186	HCN1	0	0	0	0	0	0	0	0	0	0	0	0	0	0	0	0	0	0	0	0	0	0	0	0	0	0	0	0	0	0	0	0	0	0	0	0	0	0	0	0	0	0	0	0	0	Galliform Stratum 2 & Tinamus Stratum 2 & Duck S2 & Neoaves S2	1064.94	0
20187	EMB	0	0	0	0	0	0	0	0	0	0	0	0	0	0	0	0	0	0	0	0	0	0	0	0	0	0	0	0	0	0	0	0	0	0	0	0	0	0	0	0	0	0	0	0	0	Galliform Stratum 2 & Tinamus Stratum 2 & Duck S2 & Neoaves S2	1064.94	0
20188	PARP8	0	0	0	0	0	0	0	0	0	0	0	0	0	81	0	0	0	0	2	0	0	0	0	0	0	0	0	0	0	0	0	0	0	0	0	0	0	0	0	0	0	2	0	0	85	Galliform Stratum 2 & Tinamus Stratum 2 & Duck S2 & Neoaves S2	1064.94	0.0798167
20189	ISL1	0	0	0	0	0	0	0	0	0	0	0	0	0	0	0	0	79	2	2	0	0	0	0	0	0	0	0	0	0	0	0	0	0	0	0	0	0	0	0	0	0	2	0	0	85	Galliform Stratum 2 & Tinamus Stratum 2 & Duck S2 & Neoaves S2	1064.94	0.0798167
20190	ITGA1	0	0	0	0	0	0	0	0	0	0	0	0	0	0	0	0	0	0	0	0	0	0	0	0	0	0	0	0	0	0	0	0	0	0	0	0	0	0	0	0	0	0	0	0	0	Galliform Stratum 2 & Tinamus Stratum 2 & Duck S2 & Neoaves S2	1064.94	0
20191	PELO	0	0	0	0	0	0	0	0	0	0	0	0	0	0	0	0	0	0	0	0	0	0	0	0	0	0	0	0	0	0	0	0	0	0	0	0	0	0	0	0	0	0	0	0	0	Galliform Stratum 2 & Tinamus Stratum 2 & Duck S2 & Neoaves S2	1064.94	0
20192	ITGA2	0	0	0	0	0	0	0	0	0	0	0	0	0	0	0	0	0	0	0	0	0	0	0	0	0	0	0	0	0	0	0	0	0	0	0	0	0	0	0	0	0	0	0	0	0	Galliform Stratum 2 & Tinamus Stratum 2 & Duck S2 & Neoaves S2	1064.94	0
20193	MOCS2	0	0	0	40.9	0	0	0	0	0	0	0	0	0	0	0	0	79	2	2	0	0	0	0	0	0	0	0	0	0	0	0	0	0	0	0	0	0	0	0	0	0	2	0	0	125.9	Galliform Stratum 2 & Tinamus Stratum 2 & Duck S2 & Neoaves S2	1064.94	0.118223
20194	FST	0	0	0	40.9	0	0	0	0	0	0	0	0	0	0	81	0	79	2	2	0	0	0	0	0	0	0	0	0	0	0	0	0	0	0	0	0	0	0	0	0	0	2	0	0	206.9	Galliform Stratum 2 & Tinamus Stratum 2 & Duck S2 & Neoaves S2	1064.94	0.194283
20195	NDUFS4	0	0	0	0	0	0	0	0	0	0	0	0	0	0	0	0	0	0	0	0	0	0	0	0	0	0	0	0	0	0	0	0	0	0	0	0	0	0	0	0	0	0	0	0	0	Galliform Stratum 2 & Tinamus Stratum 2 & Duck S2 & Neoaves S2	1064.94	0
20196	ARL15	0	0	0	40.9	0	39	0	0	0	0	0	0	0	0	0	79	0	2	2	0	0	0	0	0	0	0	0	0	0	0	0	0	0	0	0	0	0	0	0	0	0	2	0	0	164.9	Galliform Stratum 2 & Tinamus Stratum 2 & Duck S2 & Neoaves S2	1064.94	0.154844
20197	HSPB3	0	0	0	0	0	0	0	0	0	0	0	0	0	0	0	0	0	0	0	0	0	0	0	0	0	0	0	0	0	0	0	0	0	0	0	0	0	0	0	0	0	0	0	0	0	Galliform Stratum 2 & Tinamus Stratum 2 & Duck S2 & Neoaves S2	1064.94	0
20198	SNX18	0	0	0	0	0	0	0	0	0	0	0	0	0	0	0	0	0	0	0	0	43	43	1	0	0	0	38	6	40	13.7	0	3.34	6.46	7.2	7.2	2.6	3.9	26.3	4	38	1	2	0	0	286.7	Galliform Stratum 2 & Tinamus Stratum 2 & Duck S2 & Neoaves S2	1064.94	0.269217
20199	FREM3	0	0	0	0	0	0	0	0	0	0	0	0	0	0	0	0	0	0	0	0	0	0	0	0	0	0	0	0	0	0	0	0	0	0	0	0	0	0	0	0	0	0	0	0	0	Galliform Stratum 2 & Tinamus Stratum 2 & Duck S2 & Neoaves S2	1064.94	0
20200	ESM1	0	0	0	40.9	0	0	0	0	0	0	0	0	0	0	0	0	0	0	0	0	0	0	0	0	0	0	0	0	0	0	0	0	0	0	0	0	0	0	0	0	0	0	0	0	40.9	Galliform Stratum 2 & Tinamus Stratum 2 & Duck S2 & Neoaves S2	1064.94	0.0384059
20201	GZMK	0	0	0	0	0	0	0	0	0	0	0	0	0	0	0	0	0	0	0	0	0	0	0	0	0	0	0	0	0	0	0	0	0	0	0	0	0	0	0	0	0	0	0	0	0	Galliform Stratum 2 & Tinamus Stratum 2 & Duck S2 & Neoaves S2	1064.94	0
20202	GZMA	0	0	0	0	0	0	0	0	0	0	0	0	0	0	0	0	0	0	0	0	0	0	0	0	0	0	0	0	0	0	0	0	0	0	0	0	0	0	0	0	0	0	0	0	0	Galliform Stratum 2 & Tinamus Stratum 2 & Duck S2 & Neoaves S2	1064.94	0
20203	CDC20B	0	0	0	0	0	0	0	0	0	0	0	0	0	0	0	79	0	2	2	0	0	0	0	0	0	0	0	0	0	0	0	0	0	0	0	0	0	0	0	0	0	2	0	0	85	Galliform Stratum 2 & Tinamus Stratum 2 & Duck S2 & Neoaves S2	1064.94	0.0798167
20204	GPX8	0	0	0	0	0	0	0	0	0	0	0	0	0	0	0	0	0	0	0	0	0	0	0	0	0	0	0	0	0	0	0	0	0	0	0	0	0	0	0	0	0	0	0	0	0	Galliform Stratum 2 & Tinamus Stratum 2 & Duck S2 & Neoaves S2	1064.94	0
20205	CCNO	0	0	0	0	0	0	0	0	0	0	0	0	0	0	0	0	0	0	0	0	0	0	0	0	0	0	0	0	0	0	0	0	0	0	0	0	0	0	0	0	0	0	0	0	0	Galliform Stratum 2 & Tinamus Stratum 2 & Duck S2 & Neoaves S2	1064.94	0
20206	DHX29	0	0	0	0	0	0	0	0	0	0	0	0	0	0	0	0	0	0	0	0	0	0	0	0	0	0	0	0	0	0	0	0	0	0	0	0	0	0	0	0	0	0	0	0	0	Galliform Stratum 2 & Tinamus Stratum 2 & Duck S2 & Neoaves S2	1064.94	0
20207	MTREX	0	0	0	0	0	0	0	0	0	0	0	0	0	0	0	0	0	0	0	0	0	0	0	0	0	0	0	0	0	0	0	0	0	0	0	0	0	0	0	0	0	0	0	0	0	Galliform Stratum 2 & Tinamus Stratum 2 & Duck S2 & Neoaves S2	1064.94	0
20208	PLPP1	0	0	0	0	0	0	0	0	0	0	0	0	0	0	0	0	0	0	0	0	0	0	0	0	0	0	0	0	0	0	0	0	0	0	0	0	0	0	0	0	0	0	0	0	0	Galliform Stratum 2 & Tinamus Stratum 2 & Duck S2 & Neoaves S2	1064.94	0
20209	SLC38A9	0	0	0	0	0	0	0	0	0	0	0	0	0	0	0	0	0	0	0	0	0	0	0	0	0	0	0	0	0	0	0	0	0	0	0	0	0	0	0	0	0	0	0	0	0	Galliform Stratum 2 & Tinamus Stratum 2 & Duck S2 & Neoaves S2	1064.94	0
20210	DDX4	0	0	0	0	0	0	0	0	0	0	0	0	0	0	0	0	0	0	0	0	0	0	0	0	0	0	0	0	0	0	0	0	0	0	0	0	0	0	0	0	0	0	0	0	0	Galliform Stratum 2 & Tinamus Stratum 2 & Duck S2 & Neoaves S2	1064.94	0
20211	IL31RA	0	0	0	0	0	0	0	0	0	0	0	0	0	0	0	0	0	0	0	0	0	0	0	0	0	0	0	0	0	0	0	0	0	0	0	0	0	0	0	0	0	0	0	0	0	Galliform Stratum 2 & Tinamus Stratum 2 & Duck S2 & Neoaves S2	1064.94	0
20212	IL6ST	0	0	0	40.9	0	0	0	0	0	0	0	0	0	0	0	0	0	0	0	0	0	0	0	0	0	0	0	0	0	0	0	0	0	0	0	0	0	0	0	0	0	0	0	0	40.9	Galliform Stratum 2 & Tinamus Stratum 2 & Duck S2 & Neoaves S2	1064.94	0.0384059
20213	ANKRD55	0	0	0	0	0	0	0	0	0	0	0	0	0	0	0	0	0	0	0	0	0	0	0	0	0	0	0	0	0	0	0	0	0	0	0	0	0	0	0	0	0	0	0	0	0	Galliform Stratum 2 & Tinamus Stratum 2 & Duck S2 & Neoaves S2	1064.94	0
20214	MAP3K1	0	0	0	0	0	0	0	0	0	0	0	0	0	0	0	0	0	0	0	82	0	0	0	0	0	0	0	0	0	0	0	0	0	0	0	0	0	0	0	0	1	2	0	0	85	Galliform Stratum 2 & Tinamus Stratum 2 & Duck S2 & Neoaves S2	1064.94	0.0798167
20215	SETD9	0	0	0	0	0	0	0	0	0	0	0	0	0	0	0	0	0	0	0	0	0	0	0	0	0	0	0	0	0	0	0	0	0	0	0	0	0	0	0	0	0	0	0	0	0	Galliform Stratum 2 & Tinamus Stratum 2 & Duck S2 & Neoaves S2	1064.94	0
20216	MIER3	0	0	0	40.9	0	0	0	37	0	0	0	0	0	0	0	79	79	2	2	0	43	43	1	0	0	0	38	6	40	0	0	3.34	6.46	7.2	7.2	2.6	3.9	26.3	4	38	1	2	0	0	512.9	Galliform Stratum 2 & Tinamus Stratum 2 & Duck S2 & Neoaves S2	1064.94	0.481623
20217	GPBP1	0	0	0	0	0	0	0	37	0	0	0	0	0	81	0	79	0	2	2	0	43	0	1	0	0	0	0	0	0	0	0	0	0	0	0	0	0	0	0	38	1	2	0	0	286	Galliform Stratum 2 & Tinamus Stratum 2 & Duck S2 & Neoaves S2	1064.94	0.26856
20218	PLK2	0	0	0	40.9	0	0	0	0	0	0	0	0	0	0	0	79	0	2	2	0	0	0	0	0	0	0	0	0	0	0	0	0	0	0	0	0	0	0	0	0	0	2	0	0	125.9	Galliform Stratum 2 & Tinamus Stratum 2 & Duck S2 & Neoaves S2	1064.94	0.118223
20219	RAB3C	0	0	0	0	0	0	0	0	0	0	0	0	0	0	0	0	0	0	0	0	0	0	0	0	0	0	0	0	0	0	0	0	0	0	0	0	0	0	0	0	0	0	0	0	0	Galliform Stratum 2 & Tinamus Stratum 2 & Duck S2 & Neoaves S2	1064.94	0
20220	PDE4D	0	0	0	0	0	0	0	0	0	0	0	0	0	0	0	79	0	2	2	0	0	0	0	0	0	0	0	0	0	0	0	0	0	0	0	0	0	0	0	0	0	2	0	0	85	Galliform Stratum 2 & Tinamus Stratum 2 & Duck S2 & Neoaves S2	1064.94	0.0798167
20221	DEPDC1B	0	0	0	0	0	0	0	0	0	0	0	0	0	0	0	0	0	0	0	0	0	0	0	0	0	0	0	0	0	0	0	0	0	0	0	0	0	0	0	0	0	0	0	0	0	Galliform Stratum 2 & Tinamus Stratum 2 & Duck S2 & Neoaves S2	1064.94	0
20222	ELOVL7	0	0	0	0	0	0	0	0	0	0	0	0	0	0	0	79	0	2	2	0	0	0	0	0	0	0	0	0	0	0	0	0	0	0	0	0	0	0	0	0	0	2	0	0	85	Galliform Stratum 2 & Tinamus Stratum 2 & Duck S2 & Neoaves S2	1064.94	0.0798167
20223	ERCC8	0	0	0	0	0	0	0	0	0	0	0	0	0	0	0	0	0	0	0	0	0	0	0	0	0	0	0	0	0	0	0	0	0	0	0	0	0	0	0	0	0	0	0	0	0	Galliform Stratum 2 & Tinamus Stratum 2 & Duck S2 & Neoaves S2	1064.94	0
20224	NDUFAF2	0	0	0	0	0	0	0	0	0	0	0	0	0	0	0	0	0	0	0	0	0	0	0	0	0	0	0	0	0	0	0	0	0	0	0	0	0	0	0	0	0	0	0	0	0	Galliform Stratum 2 & Tinamus Stratum 2 & Duck S2 & Neoaves S2	1064.94	0
20225	SMIM15	0	0	0	0	0	0	0	0	0	0	0	0	0	0	0	0	0	0	0	0	0	0	0	0	0	0	0	0	0	0	0	0	0	0	0	0	0	0	0	0	0	0	0	0	0	Galliform Stratum 2 & Tinamus Stratum 2 & Duck S2 & Neoaves S2	1064.94	0
20226	ZSWIM6	0	0	0	0	0	39	0	37	0	0	0	0	0	0	0	0	0	0	0	0	43	43	1	35	35	3	38	6	40	13.7	3.34	3.34	6.46	7.2	7.2	2.6	3.9	26.3	4	38	1	2	0	0	439.04	Galliform Stratum 2 & Tinamus Stratum 2 & Duck S2 & Neoaves S2	1064.94	0.412267
20227	KIF2A	0	0	0	0	0	0	0	0	0	0	0	0	0	81	0	79	0	2	2	0	0	43	1	35	0	3	38	6	40	0	3.34	3.34	6.46	7.2	7.2	2.6	3.9	26.3	4	38	1	2	0	0	435.34	Galliform Stratum 2 & Tinamus Stratum 2 & Duck S2 & Neoaves S2	1064.94	0.408793
20228	DIMT1	0	0	0	0	0	0	0	0	0	0	0	0	0	0	0	0	0	0	0	0	0	0	0	0	0	0	0	0	0	0	0	0	0	0	0	0	0	0	0	0	0	0	0	0	0	Galliform Stratum 2 & Tinamus Stratum 2 & Duck S2 & Neoaves S2	1064.94	0
20229	IPO11	0	0	0	0	0	0	0	0	0	0	0	0	0	0	0	0	0	0	0	0	0	0	0	0	0	0	0	0	0	0	0	0	0	0	0	0	0	0	0	0	0	0	0	0	0	Galliform Stratum 2 & Tinamus Stratum 2 & Duck S2 & Neoaves S2	1064.94	0
20230	HTR1A	0	0	0	0	0	0	0	0	0	0	0	0	0	0	0	0	0	0	0	0	0	0	0	0	0	0	0	0	0	0	0	0	0	0	0	0	0	0	0	0	0	0	0	0	0	Galliform Stratum 2 & Tinamus Stratum 2 & Duck S2 & Neoaves S2	1064.94	0
20231	RNF180	0	0	0	0	0	0	0	0	0	0	0	0	0	0	0	0	0	0	0	0	0	0	0	0	0	0	0	0	0	0	0	0	0	0	0	0	0	0	0	0	0	0	0	0	0	Galliform Stratum 2 & Tinamus Stratum 2 & Duck S2 & Neoaves S2	1064.94	0
20232	RGS7BP	0	0	0	0	0	0	0	0	0	0	0	0	0	0	0	0	79	2	2	0	0	0	0	0	0	0	0	0	0	13.7	0	3.34	6.46	7.2	7.2	2.6	3.9	26.3	4	38	1	2	0	0	198.7	Galliform Stratum 2 & Tinamus Stratum 2 & Duck S2 & Neoaves S2	1064.94	0.186583
20233	SREK1IP1	0	0	0	0	0	0	0	0	0	0	0	0	0	0	0	0	0	0	0	0	0	0	0	0	0	0	0	0	0	0	0	0	0	0	0	0	0	0	0	0	0	0	0	0	0	Galliform Stratum 2 & Tinamus Stratum 2 & Duck S2 & Neoaves S2	1064.94	0
20234	CWC27	0	0	0	0	0	0	0	0	0	0	0	0	0	0	0	0	0	0	0	0	0	0	0	0	0	0	0	0	0	0	0	0	0	0	0	0	0	0	0	0	0	0	0	0	0	Galliform Stratum 2 & Tinamus Stratum 2 & Duck S2 & Neoaves S2	1064.94	0
20235	ADAMTS6	0	0	0	0	0	0	0	0	0	0	0	0	0	0	0	0	0	0	0	0	0	0	0	0	0	0	0	0	0	0	0	0	0	0	0	0	0	0	0	0	0	0	0	0	0	Galliform Stratum 2 & Tinamus Stratum 2 & Duck S2 & Neoaves S2	1064.94	0
20236	CENPK	0	0	0	40.9	0	0	0	0	0	0	0	0	0	0	0	0	0	0	0	0	0	0	0	0	0	0	0	0	0	0	0	0	0	0	0	0	0	0	0	0	0	0	0	0	40.9	Galliform Stratum 2 & Tinamus Stratum 2 & Duck S2 & Neoaves S2	1064.94	0.0384059
20237	PPWD1	0	0	0	0	0	0	0	0	0	0	0	0	0	0	0	0	0	0	0	0	0	0	0	0	0	0	0	0	0	0	0	0	0	0	0	0	0	0	0	0	0	0	0	0	0	Galliform Stratum 2 & Tinamus Stratum 2 & Duck S2 & Neoaves S2	1064.94	0
20238	TRIM23	0	0	0	0	0	0	0	0	0	0	0	0	0	0	0	0	0	0	0	0	0	0	0	0	0	0	0	0	0	0	0	0	0	0	0	0	0	0	0	0	0	0	0	0	0	Galliform Stratum 2 & Tinamus Stratum 2 & Duck S2 & Neoaves S2	1064.94	0
20239	SHLD3	0	0	0	0	0	0	0	0	0	0	0	0	0	0	0	0	0	0	0	0	0	0	0	0	0	0	0	0	0	0	0	0	0	0	0	0	0	0	0	0	0	0	0	0	0	Galliform Stratum 2 & Tinamus Stratum 2 & Duck S2 & Neoaves S2	1064.94	0
20240	TRAPPC13	0	0	0	40.9	0	0	0	0	0	0	0	0	0	0	0	0	0	0	0	0	0	0	0	0	0	0	0	0	0	0	0	0	0	0	0	0	0	0	0	0	0	0	0	0	40.9	Galliform Stratum 2 & Tinamus Stratum 2 & Duck S2 & Neoaves S2	1064.94	0.0384059
20241	SGTB	0	0	0	40.9	0	0	0	0	0	0	0	0	0	0	0	79	0	2	2	0	0	0	0	0	0	0	0	0	0	0	0	0	0	0	0	0	0	0	0	0	0	2	0	0	125.9	Galliform Stratum 2 & Tinamus Stratum 2 & Duck S2 & Neoaves S2	1064.94	0.118223
20242	NLN	0	0	0	0	0	0	0	0	0	0	0	0	0	0	0	0	0	0	0	0	0	0	0	0	0	0	0	0	0	0	0	0	0	0	0	0	0	0	0	0	0	0	0	0	0	Galliform Stratum 2 & Tinamus Stratum 2 & Duck S2 & Neoaves S2	1064.94	0
20243	ERBIN	0	0	0	40.9	0	0	0	0	0	0	0	0	0	0	0	0	0	0	0	0	0	0	0	0	0	0	0	0	0	0	0	0	0	0	0	0	0	0	0	0	0	0	0	0	40.9	Galliform Stratum 2 & Tinamus Stratum 2 & Duck S2 & Neoaves S2	1064.94	0.0384059
20244	SREK1	0	0	0	40.9	0	0	0	0	0	0	0	0	0	0	0	0	0	0	0	0	43	43	1	35	35	3	38	6	40	13.7	3.34	3.34	6.46	7.2	7.2	2.6	3.9	26.3	4	38	1	2	0	0	403.94	Galliform Stratum 2 & Tinamus Stratum 2 & Duck S2 & Neoaves S2	1064.94	0.379308
20245	MAST4	0	0	0	0	0	0	0	0	0	0	0	0	0	0	0	0	0	0	0	0	0	0	0	0	0	0	0	0	0	0	0	0	0	0	0	0	0	0	0	0	0	0	0	0	0	Galliform Stratum 2 & Tinamus Stratum 2 & Duck S2 & Neoaves S2	1064.94	0
20246	CD180	0	0	0	0	0	0	0	0	0	0	0	0	0	0	0	0	0	0	0	0	0	0	0	0	0	0	0	0	0	0	0	0	0	0	0	0	0	0	0	0	0	0	0	0	0	Galliform Stratum 2 & Tinamus Stratum 2 & Duck S2 & Neoaves S2	1064.94	0
20247	PIK3R1	0	0	0	0	0	0	0	0	0	0	0	0	0	0	0	0	0	0	0	0	0	0	0	0	0	0	0	0	0	0	0	0	0	0	0	0	0	0	0	0	0	0	0	0	0	Galliform Stratum 2 & Tinamus Stratum 2 & Duck S2 & Neoaves S2	1064.94	0
20248	SLC30A5	0	0	0	0	0	0	0	0	0	0	0	0	0	0	0	0	0	0	0	0	0	0	0	0	0	0	0	0	0	0	0	0	0	0	0	0	0	0	0	0	0	0	0	0	0	Galliform Stratum 2 & Tinamus Stratum 2 & Duck S2 & Neoaves S2	1064.94	0
20249	CENPH	0	0	0	0	0	0	0	0	0	0	0	0	0	0	0	0	0	0	0	0	0	0	0	0	0	0	0	0	0	0	0	0	0	0	0	0	0	0	0	0	0	0	0	0	0	Galliform Stratum 2 & Tinamus Stratum 2 & Duck S2 & Neoaves S2	1064.94	0
20250	MRPS36	0	0	0	0	0	0	0	0	0	0	0	0	0	81	0	0	0	0	2	0	0	43	1	0	35	3	0	6	40	0	0	0	0	0	0	0	0	0	4	38	1	2	0	0	256	Galliform Stratum 2 & Tinamus Stratum 2 & Duck S2 & Neoaves S2	1064.94	0.240389
20251	CDK7	0	0	0	0	0	0	0	0	0	0	0	0	0	0	0	0	0	0	0	0	0	0	0	0	0	0	0	0	0	0	0	0	0	0	0	0	0	0	0	0	0	0	0	0	0	Galliform Stratum 2 & Tinamus Stratum 2 & Duck S2 & Neoaves S2	1064.94	0
20252	SERINC5	0	0	0	0	0	0	0	0	0	0	0	0	0	0	0	0	0	0	0	0	0	0	0	0	0	0	0	0	0	0	0	0	0	0	0	0	0	0	0	0	0	0	0	0	0	Galliform Stratum 2 & Tinamus Stratum 2 & Duck S2 & Neoaves S2	1064.94	0
20253	THBS4	0	0	0	0	0	0	0	0	0	0	0	0	0	0	0	0	0	0	0	0	0	0	0	0	0	0	0	0	0	0	0	0	0	0	0	0	0	0	0	0	0	0	0	0	0	Galliform Stratum 2 & Tinamus Stratum 2 & Duck S2 & Neoaves S2	1064.94	0
20254	MTX3	0	0	0	40.9	0	0	0	0	0	0	0	0	0	0	0	0	0	0	0	0	0	0	0	0	0	0	0	0	0	0	0	0	0	0	0	0	0	0	0	0	0	0	0	0	40.9	Galliform Stratum 2 & Tinamus Stratum 2 & Duck S2 & Neoaves S2	1064.94	0.0384059
20255	CMYA5	0	0	0	0	0	0	0	0	0	0	0	0	0	0	0	79	79	2	2	0	0	0	0	0	0	0	0	0	0	0	0	0	0	0	0	0	0	0	0	0	0	2	0	0	164	Galliform Stratum 2 & Tinamus Stratum 2 & Duck S2 & Neoaves S2	1064.94	0.153999
20256	TENT2	0	0	0	0	0	0	0	0	0	0	0	0	0	0	0	0	0	0	0	0	0	0	0	0	0	0	0	0	0	0	0	0	0	0	0	0	0	0	0	0	0	0	0	0	0	Galliform Stratum 2 & Tinamus Stratum 2 & Duck S2 & Neoaves S2	1064.94	0
20257	HOMER1	0	0	0	40.9	0	0	0	0	0	0	0	0	0	0	81	79	79	2	2	82	0	0	0	0	0	0	0	0	40	13.7	0	0	0	0	7.2	2.6	3.9	26.3	4	38	1	2	0	0	504.6	Galliform Stratum 2 & Tinamus Stratum 2 & Duck S2 & Neoaves S2	1064.94	0.47383
20258	JMY	0	0	0	40.9	0	0	0	0	0	0	0	0	0	0	81	0	79	2	2	82	0	0	0	0	0	0	0	0	0	0	0	0	0	0	0	0	0	0	0	0	1	2	0	0	289.9	Galliform Stratum 2 & Tinamus Stratum 2 & Duck S2 & Neoaves S2	1064.94	0.272222
20259	BHMT	0	0	0	0	0	0	0	0	0	0	0	0	0	0	0	0	0	0	0	0	0	0	0	0	0	0	0	0	0	0	0	0	0	0	0	0	0	0	0	0	0	0	0	0	0	Galliform Stratum 2 & Tinamus Stratum 2 & Duck S2 & Neoaves S2	1064.94	0
20260	DMGDH	0	0	0	0	0	0	0	0	0	0	0	0	0	0	0	0	0	0	0	0	0	0	0	0	0	0	0	0	0	0	0	0	0	0	0	0	0	0	0	0	0	0	0	0	0	Galliform Stratum 2 & Tinamus Stratum 2 & Duck S2 & Neoaves S2	1064.94	0
20261	ARSB	0	0	0	0	0	0	0	0	0	0	0	0	0	0	0	0	0	0	0	0	0	0	0	0	0	0	0	0	0	0	0	0	0	0	0	0	0	0	0	0	0	0	0	0	0	Galliform Stratum 2 & Tinamus Stratum 2 & Duck S2 & Neoaves S2	1064.94	0
20262	LHFPL2	0	0	0	0	0	0	0	0	0	0	0	0	0	0	0	0	0	0	0	0	0	0	0	0	0	0	0	0	0	0	0	0	0	0	0	0	0	0	0	0	0	0	0	0	0	Galliform Stratum 2 & Tinamus Stratum 2 & Duck S2 & Neoaves S2	1064.94	0
20263	SCAMP1	0	0	0	40.9	0	0	0	0	0	0	0	0	0	0	81	0	79	2	2	0	43	0	1	0	0	0	38	6	0	13.7	0	3.34	6.46	7.2	7.2	2.6	3.9	26.3	4	38	1	2	0	0	408.6	Galliform Stratum 2 & Tinamus Stratum 2 & Duck S2 & Neoaves S2	1064.94	0.383684
20264	AP3B1	0	0	0	0	0	0	0	0	0	0	0	0	0	0	0	0	0	0	0	0	0	0	0	0	0	0	0	0	0	0	0	0	0	0	0	0	0	0	0	0	0	0	0	0	0	Galliform Stratum 2 & Tinamus Stratum 2 & Duck S2 & Neoaves S2	1064.94	0
20265	TBCA	0	0	0	0	0	0	0	0	0	0	0	0	0	81	0	0	79	2	2	0	0	0	0	0	0	0	0	0	0	0	0	0	0	0	0	0	0	0	0	0	0	2	0	0	166	Galliform Stratum 2 & Tinamus Stratum 2 & Duck S2 & Neoaves S2	1064.94	0.155877
20266	OTP	0	0	0	0	0	0	0	0	0	0	0	0	0	0	0	0	0	0	0	0	0	0	0	0	0	0	0	0	0	0	0	0	0	0	0	0	0	0	0	0	0	0	0	0	0	Galliform Stratum 2 & Tinamus Stratum 2 & Duck S2 & Neoaves S2	1064.94	0
20267	WDR41	0	0	0	40.9	0	0	0	0	0	0	0	0	0	0	0	0	0	0	0	0	0	0	0	0	0	0	0	0	0	0	0	0	0	0	0	0	0	0	0	0	0	0	0	0	40.9	Galliform Stratum 2 & Tinamus Stratum 2 & Duck S2 & Neoaves S2	1064.94	0.0384059
20268	PDE8B	0	0	0	0	0	0	0	0	0	0	0	0	0	0	0	0	0	0	0	0	0	0	0	0	0	0	0	0	0	0	0	0	0	0	0	0	0	0	0	0	0	0	0	0	0	Galliform Stratum 2 & Tinamus Stratum 2 & Duck S2 & Neoaves S2	1064.94	0
20269	AGGF1	0	0	0	0	0	0	0	0	0	0	0	0	0	0	0	0	0	0	0	0	0	0	0	0	0	0	0	0	0	0	0	0	0	0	0	0	0	0	0	0	0	0	0	0	0	Galliform Stratum 2 & Tinamus Stratum 2 & Duck S2 & Neoaves S2	1064.94	0
20270	CRHBP	0	0	0	0	0	0	0	0	0	0	0	0	0	0	0	0	0	0	0	0	0	0	0	0	0	0	0	0	0	0	0	0	0	0	0	0	0	0	0	0	0	0	0	0	0	Galliform Stratum 2 & Tinamus Stratum 2 & Duck S2 & Neoaves S2	1064.94	0
20271	S100Z	0	0	0	0	0	0	0	0	0	0	0	0	0	0	0	0	0	0	0	0	0	0	0	0	0	0	0	0	0	0	0	0	0	0	0	0	0	0	0	0	0	0	0	0	0	Galliform Stratum 2 & Tinamus Stratum 2 & Duck S2 & Neoaves S2	1064.94	0
20272	F2RL1	0	0	0	0	0	0	0	0	0	0	0	0	0	0	0	0	0	0	0	0	0	0	0	0	0	0	0	0	0	0	0	0	0	0	0	0	0	0	0	0	0	0	0	0	0	Galliform Stratum 2 & Tinamus Stratum 2 & Duck S2 & Neoaves S2	1064.94	0
20273	F2R	0	0	0	0	0	0	0	0	0	0	0	0	0	0	0	0	0	0	0	0	0	0	0	0	0	0	0	0	0	0	0	0	0	0	0	0	0	0	0	0	0	0	0	0	0	Galliform Stratum 2 & Tinamus Stratum 2 & Duck S2 & Neoaves S2	1064.94	0
20274	F2RL2	0	0	0	0	0	0	0	0	0	0	0	0	0	0	0	0	0	0	0	0	0	0	0	0	0	0	0	0	0	0	0	0	0	0	0	0	0	0	0	0	0	0	0	0	0	Galliform Stratum 2 & Tinamus Stratum 2 & Duck S2 & Neoaves S2	1064.94	0
20275	IQGAP2	0	0	0	0	0	0	0	0	0	0	0	0	0	0	0	0	0	0	0	0	0	0	0	0	0	0	0	0	0	0	0	0	0	0	0	0	0	0	0	0	0	0	0	0	0	Galliform Stratum 2 & Tinamus Stratum 2 & Duck S2 & Neoaves S2	1064.94	0
20276	SV2C	0	0	0	0	0	0	0	0	0	0	0	0	0	0	0	0	0	0	0	0	0	0	0	0	0	0	0	0	0	0	0	0	0	0	0	0	0	0	0	0	0	0	0	0	0	Galliform Stratum 2 & Tinamus Stratum 2 & Duck S2 & Neoaves S2	1064.94	0
20277	POC5	0	0	0	0	0	0	0	0	0	0	0	0	0	0	0	0	0	0	0	0	0	0	0	0	0	0	0	0	0	0	0	0	0	0	0	0	0	0	0	0	0	0	0	0	0	Galliform Stratum 2 & Tinamus Stratum 2 & Duck S2 & Neoaves S2	1064.94	0
20278	ANKDD1B	0	0	0	0	0	0	0	0	0	0	0	0	0	0	0	0	0	0	0	0	0	0	0	0	0	0	0	0	0	0	0	0	0	0	0	0	0	0	0	0	0	0	0	0	0	Galliform Stratum 2 & Tinamus Stratum 2 & Duck S2 & Neoaves S2	1064.94	0
20279	POLK	0	0	0	0	0	0	0	0	0	0	0	0	0	0	0	0	0	0	0	0	0	0	0	0	0	0	0	0	0	0	0	0	0	0	0	0	0	0	0	0	0	0	0	0	0	Galliform Stratum 2 & Tinamus Stratum 2 & Duck S2 & Neoaves S2	1064.94	0
20280	CERT1	0	0	0	40.9	0	0	0	0	0	0	0	0	0	0	81	0	0	0	2	82	43	43	1	35	35	3	38	6	40	13.7	3.34	0	6.46	7.2	7.2	2.6	3.9	26.3	4	38	1	2	0	0	565.6	Galliform Stratum 2 & Tinamus Stratum 2 & Duck S2 & Neoaves S2	1064.94	0.53111
20281	MED18	0	0	0	0	0	0	0	0	0	0	0	0	0	0	0	0	0	0	0	0	0	0	0	0	0	0	0	0	0	0	0	0	0	0	0	0	0	0	0	0	0	0	0	0	0	Galliform Stratum 2 & Tinamus Stratum 2 & Duck S2 & Neoaves S2	1064.94	0
20282	HMGCR	0	0	0	0	0	0	0	0	0	0	0	0	0	0	81	0	0	0	2	0	0	0	0	0	0	0	0	0	0	0	0	0	0	0	0	0	0	0	0	0	0	2	0	0	85	Galliform Stratum 2 & Tinamus Stratum 2 & Duck S2 & Neoaves S2	1064.94	0.0798167
20283	ANKRD31	0	0	0	0	0	0	0	0	0	0	0	0	0	0	0	79	0	2	2	0	0	0	0	0	0	0	0	0	0	0	0	0	0	0	0	0	0	0	0	0	0	2	0	0	85	Galliform Stratum 2 & Tinamus Stratum 2 & Duck S2 & Neoaves S2	1064.94	0.0798167
20284	GCNT4	0	0	0	0	0	0	0	0	0	0	0	0	0	0	0	0	0	0	0	0	0	0	0	0	0	0	0	0	0	0	0	0	0	0	0	0	0	0	0	0	0	0	0	0	0	Galliform Stratum 2 & Tinamus Stratum 2 & Duck S2 & Neoaves S2	1064.94	0
20285	FAM169A	0	0	0	40.9	0	0	0	0	0	0	0	0	0	0	0	0	0	0	0	0	0	0	0	0	0	0	0	0	0	0	0	0	0	0	0	0	0	0	0	0	0	0	0	0	40.9	Galliform Stratum 2 & Tinamus Stratum 2 & Duck S2 & Neoaves S2	1064.94	0.0384059
20286	NSA2	0	0	0	0	0	0	0	0	0	0	0	0	0	0	0	0	0	0	0	0	0	0	0	0	0	0	0	0	0	0	0	0	0	0	0	0	0	0	0	0	0	0	0	0	0	Galliform Stratum 2 & Tinamus Stratum 2 & Duck S2 & Neoaves S2	1064.94	0
20287	GFM2	0	0	0	0	0	0	0	0	0	0	0	0	0	0	0	0	0	0	0	0	0	0	0	0	0	0	0	0	0	0	0	0	0	0	0	0	0	0	0	0	0	0	0	0	0	Galliform Stratum 2 & Tinamus Stratum 2 & Duck S2 & Neoaves S2	1064.94	0
20288	HEXB	0	0	0	0	0	0	0	0	0	0	0	0	0	0	0	0	0	0	0	0	0	0	0	0	0	0	0	0	0	0	0	0	0	0	0	0	0	0	0	0	0	0	0	0	0	Galliform Stratum 2 & Tinamus Stratum 2 & Duck S2 & Neoaves S2	1064.94	0
20289	ENC1	0	0	0	0	0	0	0	0	0	0	0	0	0	0	0	0	0	0	0	0	0	0	0	0	0	0	0	0	0	0	0	0	0	0	0	0	0	0	0	0	0	0	0	0	0	Galliform Stratum 2 & Tinamus Stratum 2 & Duck S2 & Neoaves S2	1064.94	0
20290	ARHGEF28	0	0	0	0	0	0	0	0	0	0	0	0	0	0	0	0	0	0	0	0	0	0	0	0	0	0	0	0	0	0	0	0	0	0	0	0	0	0	0	0	0	0	0	0	0	Galliform Stratum 2 & Tinamus Stratum 2 & Duck S2 & Neoaves S2	1064.94	0
20291	UTP15	0	0	0	0	0	0	0	0	0	0	0	0	0	0	0	0	0	0	0	0	0	0	0	0	0	0	0	0	0	0	0	0	0	0	0	0	0	0	0	0	0	0	0	0	0	Galliform Stratum 2 & Tinamus Stratum 2 & Duck S2 & Neoaves S2	1064.94	0
20292	ANKRA2	0	0	0	0	0	0	0	0	0	0	0	0	0	0	0	0	0	0	0	0	0	0	0	0	0	0	0	0	0	0	0	0	0	0	0	0	0	0	0	0	0	0	0	0	0	Galliform Stratum 2 & Tinamus Stratum 2 & Duck S2 & Neoaves S2	1064.94	0
20293	BTF3	0	0	0	0	0	0	0	37	0	0	0	0	0	0	0	0	79	2	2	0	43	0	1	0	0	0	38	6	40	13.7	3.34	3.34	6.46	7.2	7.2	2.6	3.9	26.3	4	38	1	2	0	0	367.04	Galliform Stratum 2 & Tinamus Stratum 2 & Duck S2 & Neoaves S2	1064.94	0.344658
20294	FOXD1	0	0	0	0	0	0	0	0	0	0	0	0	0	0	0	0	0	0	0	0	0	0	0	0	0	0	38	6	40	13.7	0	3.34	6.46	7.2	7.2	2.6	3.9	26.3	4	38	1	2	0	0	199.7	Galliform Stratum 2 & Tinamus Stratum 2 & Duck S2 & Neoaves S2	1064.94	0.187522
20295	TMEM174	0	0	0	40.9	0	0	0	0	0	0	0	0	0	0	0	79	0	2	2	0	0	0	0	0	0	0	0	0	0	0	0	0	0	0	0	0	0	0	0	0	0	2	0	0	125.9	Galliform Stratum 2 & Tinamus Stratum 2 & Duck S2 & Neoaves S2	1064.94	0.118223
20296	TMEM171	0	0	0	0	0	0	0	0	0	0	0	0	0	0	0	0	0	0	0	0	0	0	0	0	0	0	0	0	0	0	0	0	0	0	0	0	0	0	0	0	0	0	0	0	0	Galliform Stratum 2 & Tinamus Stratum 2 & Duck S2 & Neoaves S2	1064.94	0
20297	FCHO2	0	0	0	40.9	0	0	0	0	0	0	0	0	0	0	0	0	79	2	2	0	43	0	1	0	0	0	0	0	0	13.7	3.34	0	6.46	7.2	7.2	2.6	3.9	26.3	4	38	1	2	0	0	283.6	Galliform Stratum 2 & Tinamus Stratum 2 & Duck S2 & Neoaves S2	1064.94	0.266306
20298	TNPO1	0	0	0	40.9	0	0	0	0	0	0	0	0	0	81	81	79	79	2	2	0	43	43	1	0	0	0	38	6	40	13.7	3.34	3.34	6.46	7.2	7.2	2.6	3.9	26.3	4	38	1	2	0	0	654.94	Galliform Stratum 2 & Tinamus Stratum 2 & Duck S2 & Neoaves S2	1064.94	0.615002
20299	ZNF366	0	0	0	0	0	0	0	0	0	0	0	0	0	0	0	0	0	0	0	0	0	0	0	0	0	0	0	0	0	0	0	0	0	0	0	0	0	0	0	0	0	0	0	0	0	Galliform Stratum 2 & Tinamus Stratum 2 & Duck S2 & Neoaves S2	1064.94	0
20300	PTCD2	0	0	0	0	0	0	0	0	0	0	0	0	0	0	0	0	0	0	0	0	0	0	0	0	0	0	0	0	0	0	0	0	0	0	0	0	0	0	0	0	0	0	0	0	0	Galliform Stratum 2 & Tinamus Stratum 2 & Duck S2 & Neoaves S2	1064.94	0
20301	MRPS27	0	0	0	40.9	0	0	0	0	0	0	0	0	0	0	0	0	0	0	0	0	0	0	0	0	0	0	0	0	0	0	0	0	0	0	0	0	0	0	0	0	0	0	0	0	40.9	Galliform Stratum 2 & Tinamus Stratum 2 & Duck S2 & Neoaves S2	1064.94	0.0384059
20302	MAP1B	0	0	0	0	0	39	0	0	0	0	0	0	0	0	0	0	0	0	0	0	43	43	1	0	35	3	38	6	40	0	3.34	3.34	6.46	7.2	7.2	2.6	3.9	26.3	4	38	1	2	0	0	353.34	Galliform Stratum 2 & Tinamus Stratum 2 & Duck S2 & Neoaves S2	1064.94	0.331793
20303	CARTPT	0	0	0	0	0	0	0	0	0	0	0	0	0	0	0	0	0	0	0	0	0	0	0	0	0	0	0	0	0	0	0	0	0	0	0	0	0	0	0	0	0	0	0	0	0	Tinamus Stratum 2 & Neognathae Stratum 1	1176.94	0
20304	MCCC2	0	0	0	0	0	0	0	0	0	0	0	0	0	0	0	0	0	0	0	0	0	0	0	0	0	0	0	0	0	0	0	0	0	0	0	0	0	0	0	0	0	0	0	0	0	Tinamus Stratum 2 & Neognathae Stratum 1	1176.94	0
20305	BDP1	0	0	0	0	0	0	0	0	0	0	0	0	0	0	0	0	0	0	0	0	0	0	0	0	0	0	0	0	0	0	0	0	0	0	0	0	0	0	0	0	0	0	0	0	0	Tinamus Stratum 2 & Neognathae Stratum 1	1176.94	0
20306	SERF1A	0	0	0	40.9	0	0	0	0	0	0	0	0	0	0	0	0	0	0	0	0	0	0	0	0	0	0	0	0	0	0	0	0	0	0	0	0	0	0	0	0	0	0	0	0	40.9	Tinamus Stratum 2 & Neognathae Stratum 1	1176.94	0.0347511
20307	STMN1	0	0	0	0	0	0	0	0	0	0	0	0	0	0	0	0	0	0	0	0	0	0	0	0	0	0	0	0	0	0	0	0	0	0	0	0	0	0	0	0	0	0	0	0	0	Tinamus Stratum 2 & Neognathae Stratum 1	1176.94	0
20308	NAIP	0	0	0	0	0	0	0	0	0	0	0	0	0	0	0	0	0	0	0	0	0	0	0	0	0	0	0	0	0	0	0	0	0	0	0	0	0	0	0	0	0	0	0	0	0	Tinamus Stratum 2 & Neognathae Stratum 1	1176.94	0
20309	GTF2H2	0	0	0	0	0	0	0	0	0	0	0	0	0	0	0	0	0	0	0	0	0	0	0	0	0	0	0	0	0	0	0	0	0	0	0	0	0	0	0	0	0	0	0	0	0	Tinamus Stratum 2 & Neognathae Stratum 1	1176.94	0
20310	MARVELD2	0	0	0	0	0	0	0	0	0	0	0	0	0	0	0	0	0	0	0	0	0	0	0	0	0	0	0	0	0	0	0	0	0	0	0	0	0	0	0	0	0	0	0	0	0	Tinamus Stratum 2 & Neognathae Stratum 1	1176.94	0
20311	RAD17	0	0	0	0	0	0	0	0	0	0	0	0	0	0	0	0	0	0	0	0	0	0	0	0	0	0	0	0	0	0	0	0	0	0	0	0	0	0	0	0	0	0	0	0	0	Tinamus Stratum 2 & Neognathae Stratum 1	1176.94	0
20312	AK6	0	0	0	0	0	0	0	0	0	0	0	0	0	0	0	0	0	0	0	0	0	0	0	0	0	0	0	0	0	0	0	0	0	0	0	0	0	0	0	0	0	0	0	0	0	Tinamus Stratum 2 & Neognathae Stratum 1	1176.94	0
20313	CCDC125	0	0	0	0	0	0	0	0	0	0	0	0	0	0	0	0	0	0	0	0	0	0	0	0	0	0	0	0	0	0	0	0	0	0	0	0	0	0	0	0	0	0	0	0	0	Tinamus Stratum 2 & Neognathae Stratum 1	1176.94	0
20314	ZFYVE16	0	0	0	0	0	0	0	0	0	0	0	0	0	0	0	0	0	0	0	0	0	0	0	0	0	0	0	0	0	0	0	0	0	0	0	0	0	0	0	0	0	0	0	0	0	Tinamus Stratum 2 & Neognathae Stratum 1	1176.94	0
20315	FAM151B	0	0	0	0	0	0	0	0	0	0	0	0	0	0	0	0	0	0	0	0	0	0	0	0	0	0	0	0	0	0	0	0	0	0	0	0	0	0	0	0	0	0	0	0	0	Tinamus Stratum 2 & Neognathae Stratum 1	1176.94	0
20316	ANKRD34B	0	0	0	0	0	0	0	0	0	0	0	0	0	0	0	0	0	0	0	0	0	0	0	0	0	0	0	0	0	0	0	0	0	0	0	0	0	0	0	0	0	0	0	0	0	Tinamus Stratum 2 & Neognathae Stratum 1	1176.94	0
20317	DHFR	0	0	0	0	0	0	0	0	0	0	0	0	0	0	0	0	0	0	0	0	0	0	0	0	0	0	0	0	0	0	0	0	0	0	0	0	0	0	0	0	0	0	0	0	0	Tinamus Stratum 2 & Neognathae Stratum 1	1176.94	0
20318	MSH3	0	0	0	0	0	0	0	0	0	0	0	0	0	0	0	0	0	0	0	0	0	0	0	0	0	0	0	0	0	0	0	0	0	0	0	0	0	0	0	0	0	0	0	0	0	Tinamus Stratum 2 & Neognathae Stratum 1	1176.94	0
20319	RASGRF2	0	0	0	0	0	0	0	0	0	0	0	0	0	0	0	0	0	0	0	0	0	0	0	0	0	0	0	0	0	0	0	0	0	0	0	0	0	0	0	0	0	0	0	0	0	Tinamus Stratum 2 & Neognathae Stratum 1	1176.94	0
20320	CKMT2	0	0	0	0	0	0	0	0	0	0	0	0	0	0	0	0	0	0	0	0	43	43	1	35	35	3	38	6	40	13.7	3.34	3.34	6.46	7.2	7.2	2.6	3.9	26.3	4	38	1	2	13	0	376.04	Tinamus Stratum 2 & Neognathae Stratum 1	1176.94	0.319507
20321	ZCCHC9	0	0	0	40.9	0	0	0	0	0	0	0	0	0	0	0	0	0	0	0	0	0	0	0	0	0	0	0	0	0	0	0	0	0	0	0	0	0	0	0	0	0	0	0	0	40.9	Tinamus Stratum 2 & Neognathae Stratum 1	1176.94	0.0347511
20322	ACOT12	0	0	0	0	0	0	0	0	0	0	0	0	0	0	0	0	0	0	0	0	0	0	0	0	0	0	0	0	0	0	0	0	0	0	0	0	0	0	0	0	0	0	0	0	0	Tinamus Stratum 2 & Neognathae Stratum 1	1176.94	0
20323	SSBP2	0	0	0	0	0	0	0	0	0	0	0	0	0	0	0	0	0	0	0	0	0	0	0	0	0	0	0	0	0	0	0	0	0	0	0	0	0	0	0	0	0	0	0	0	0	Tinamus Stratum 2 & Neognathae Stratum 1	1176.94	0
20324	ATG10	0	0	0	0	0	0	0	0	0	0	0	0	0	0	0	0	0	0	0	0	0	0	0	0	0	0	0	0	0	0	0	0	0	0	0	0	0	0	0	0	0	0	0	0	0	Tinamus Stratum 2 & Neognathae Stratum 1	1176.94	0
20325	RPS23	0	0	0	40.9	0	0	0	0	0	0	0	0	0	0	0	0	0	0	0	0	0	0	0	0	0	0	0	0	0	0	0	0	0	0	0	0	0	0	0	0	0	0	0	0	40.9	Tinamus Stratum 2 & Neognathae Stratum 1	1176.94	0.0347511
20326	ATP6AP1L	0	0	0	0	0	0	0	0	0	0	0	0	0	0	0	0	0	0	0	0	0	0	0	0	0	0	0	0	0	0	0	0	0	0	0	0	0	0	0	0	0	0	0	0	0	Tinamus Stratum 2 & Neognathae Stratum 1	1176.94	0
20327	TMEM167A	0	0	0	0	0	0	0	0	0	0	0	0	0	0	0	0	0	0	0	0	0	0	0	0	0	0	0	0	0	0	0	0	0	0	0	0	0	0	0	0	0	0	0	0	0	Tinamus Stratum 2 & Neognathae Stratum 1	1176.94	0
20328	XRCC4	0	0	0	0	0	0	0	0	0	0	0	0	0	0	0	0	0	0	0	0	0	0	0	0	0	0	0	0	0	0	0	0	0	0	0	0	0	0	0	0	0	0	0	0	0	Tinamus Stratum 2 & Neognathae Stratum 1	1176.94	0
20329	VCAN	0	0	0	0	0	0	0	0	0	0	0	0	0	0	0	0	0	0	0	0	0	0	0	0	0	0	0	0	0	0	0	0	0	0	0	0	0	0	0	0	0	0	0	0	0	Tinamus Stratum 2 & Neognathae Stratum 1	1176.94	0
20330	HAPLN1	0	0	0	40.9	0	0	0	0	0	0	0	0	0	0	0	0	0	0	0	0	0	0	0	0	0	0	0	0	0	0	0	0	0	0	0	0	0	0	0	0	0	0	0	0	40.9	Tinamus Stratum 2 & Neognathae Stratum 1	1176.94	0.0347511
20331	EDIL3	0	0	0	0	0	0	0	0	0	0	0	0	0	0	0	0	0	0	0	0	0	0	0	0	0	0	0	0	0	0	0	0	0	0	0	0	0	0	0	0	0	0	0	0	0	Tinamus Stratum 2 & Neognathae Stratum 1	1176.94	0
20332	COX7C	0	0	0	0	0	0	0	0	0	0	0	0	0	0	0	0	0	0	0	0	0	0	0	0	0	0	0	0	0	0	0	0	0	0	0	0	0	0	0	0	0	0	0	0	0	Tinamus Stratum 2 & Neognathae Stratum 1	1176.94	0
20333	RASA1	0	0	0	0	0	77	37	37	40	21	0	0	0	0	0	0	0	0	0	0	43	43	1	35	0	3	0	6	40	13.7	3.34	3.34	6.46	7.2	7.2	2.6	3.9	26.3	4	38	1	2	13	0	515.04	Tinamus Stratum 2 & Neognathae Stratum 1	1176.94	0.437609
20334	CCNH	0	0	0	0	0	0	0	0	0	0	0	0	0	0	0	0	0	0	0	0	0	0	0	0	0	0	0	0	0	0	0	0	0	0	0	0	0	0	0	0	0	0	0	0	0	Tinamus Stratum 2 & Neognathae Stratum 1	1176.94	0
20335	TMEM161B	0	0	0	40.9	0	0	0	0	0	0	0	0	0	0	0	0	0	0	0	0	0	0	0	0	0	0	0	0	40	13.7	0	3.34	6.46	7.2	7.2	2.6	3.9	26.3	4	38	1	2	13	0	209.6	Tinamus Stratum 2 & Neognathae Stratum 1	1176.94	0.178089
20336	MEF2C	0	0	0	40.9	0	0	0	0	0	0	0	0	0	0	0	0	0	0	0	0	0	0	0	0	0	0	0	0	0	0	0	0	0	0	0	0	0	0	0	0	0	0	0	0	40.9	Tinamus Stratum 2 & Neognathae Stratum 1	1176.94	0.0347511
20337	CETN3	0	0	0	0	0	0	0	0	0	0	0	0	0	0	0	0	0	0	0	0	0	0	0	0	0	0	0	0	0	0	0	0	0	0	0	0	0	0	0	0	0	0	0	0	0	Tinamus Stratum 2 & Neognathae Stratum 1	1176.94	0
20338	MBLAC2	0	0	0	0	0	0	0	0	0	0	0	0	0	0	0	0	0	0	0	0	0	0	0	0	0	0	0	0	0	0	0	0	0	0	0	0	0	0	0	0	0	0	0	0	0	Tinamus Stratum 2 & Neognathae Stratum 1	1176.94	0
20339	POLR3G	0	0	0	0	0	0	0	0	0	0	0	0	0	0	0	0	0	0	0	0	0	0	0	0	0	0	0	0	0	0	0	0	0	0	0	0	0	0	0	0	0	0	0	0	0	Tinamus Stratum 2 & Neognathae Stratum 1	1176.94	0
20340	LYSMD3	0	0	0	0	0	0	0	0	0	0	0	0	0	0	0	0	0	0	0	0	0	0	0	0	0	0	0	0	0	0	0	0	0	0	0	0	0	0	0	0	0	0	0	0	0	Tinamus Stratum 2 & Neognathae Stratum 1	1176.94	0
20341	ADGRV1	0	0	0	0	0	0	0	0	0	0	0	0	0	0	0	0	0	0	0	0	0	0	0	0	0	0	0	0	0	0	0	0	0	0	0	0	0	0	0	0	0	0	0	0	0	Tinamus Stratum 2 & Neognathae Stratum 1	1176.94	0
20342	ARRDC3	0	0	0	40.9	0	0	0	0	0	0	0	0	0	81	0	79	79	2	2	0	0	43	1	35	35	3	0	6	40	0	0	0	0	0	0	0	0	0	4	38	1	2	13	0	504.9	Tinamus Stratum 2 & Neognathae Stratum 1	1176.94	0.428994
20343	NR2F1	0	0	0	0	0	0	0	0	0	0	0	0	0	0	0	0	0	0	0	0	0	0	0	0	0	0	0	0	0	0	0	0	0	0	0	0	0	0	0	0	0	0	0	0	0	Tinamus Stratum 2 & Neognathae Stratum 1	1176.94	0
20344	FAM172A	0	0	0	0	0	0	0	0	0	0	0	0	0	0	0	0	0	0	0	0	0	0	0	0	0	0	0	0	0	0	0	0	0	0	0	0	0	0	0	0	0	0	0	0	0	Tinamus Stratum 2 & Neognathae Stratum 1	1176.94	0
20345	KIAA0825	0	0	0	0	0	0	0	0	0	0	0	0	0	0	0	0	0	0	0	0	0	0	0	0	0	0	0	0	0	0	0	0	0	0	0	0	0	0	0	0	0	0	0	0	0	Tinamus Stratum 2 & Neognathae Stratum 1	1176.94	0
20346	SLF1	0	0	0	0	0	0	0	0	0	0	0	0	0	0	0	0	0	0	0	0	0	0	0	0	0	0	0	0	0	0	0	0	0	0	0	0	0	0	0	0	0	0	0	0	0	Tinamus Stratum 2 & Neognathae Stratum 1	1176.94	0
20347	MCTP1	0	0	0	0	0	0	0	0	0	0	0	0	0	0	0	0	0	0	0	0	0	0	0	0	0	0	0	0	0	0	0	0	0	0	0	0	0	0	0	0	0	0	0	0	0	Tinamus Stratum 2 & Neognathae Stratum 1	1176.94	0
20348	FAM81B	0	0	0	0	0	0	0	0	0	0	0	0	0	0	0	0	0	0	0	0	0	0	0	0	0	0	0	0	0	0	0	0	0	0	0	0	0	0	0	0	0	0	0	0	0	Tinamus Stratum 2 & Neognathae Stratum 1	1176.94	0
20349	TTC37	0	0	0	0	0	0	0	0	0	0	0	0	0	0	0	0	0	0	0	0	0	0	0	0	0	0	0	0	0	0	0	0	0	0	0	0	0	0	0	0	0	0	0	0	0	Tinamus Stratum 2 & Neognathae Stratum 1	1176.94	0
20350	ARSK	0	0	0	0	0	0	0	0	0	0	0	0	0	0	0	0	0	0	0	0	0	0	0	0	0	0	0	0	0	0	0	0	0	0	0	0	0	0	0	0	0	0	0	0	0	Tinamus Stratum 2 & Neognathae Stratum 1	1176.94	0
20351	RFESD	0	0	0	0	0	0	0	0	0	0	0	0	0	0	0	0	0	0	0	0	0	0	0	0	0	0	0	0	0	0	0	0	0	0	0	0	0	0	0	0	0	0	0	0	0	Tinamus Stratum 2 & Neognathae Stratum 1	1176.94	0
20352	RHOBTB3	0	0	0	0	0	0	0	0	0	0	0	0	0	0	0	0	0	0	0	0	0	0	0	0	0	0	0	0	0	0	0	0	0	0	0	0	0	0	0	0	0	0	0	0	0	Tinamus Stratum 2 & Neognathae Stratum 1	1176.94	0
20353	GLRX	0	0	0	0	0	0	0	0	0	0	0	0	0	0	0	0	0	0	0	0	0	0	0	0	0	0	0	0	0	0	0	0	0	0	0	0	0	0	0	0	0	0	0	0	0	Tinamus Stratum 2 & Neognathae Stratum 1	1176.94	0
20354	ELL2	0	0	0	0	0	0	0	0	0	0	0	0	0	0	0	0	0	0	0	0	0	0	0	0	0	0	0	0	0	0	0	0	0	0	0	0	0	0	0	0	0	0	0	0	0	Tinamus Stratum 2 & Neognathae Stratum 1	1176.94	0
20355	PCSK1	0	0	0	0	0	0	0	0	0	0	0	0	0	0	0	0	0	0	0	0	0	0	0	0	0	0	0	0	0	0	0	0	0	0	0	0	0	0	0	0	0	0	0	0	0	Tinamus Stratum 2 & Neognathae Stratum 1	1176.94	0
20356	CAST	0	0	0	0	0	0	0	0	0	0	0	0	0	0	0	0	0	0	0	0	0	0	0	0	0	0	0	0	0	0	0	0	0	0	0	0	0	0	0	0	0	0	0	0	0	Tinamus Stratum 2 & Neognathae Stratum 1	1176.94	0
20357	ERAP1	0	0	0	0	0	0	0	0	0	0	0	0	0	0	0	0	0	0	0	0	0	0	0	0	0	0	0	0	0	0	0	0	0	0	0	0	0	0	0	0	0	0	0	0	0	Tinamus Stratum 2 & Neognathae Stratum 1	1176.94	0
20358	LNPEP	0	0	0	0	0	0	0	0	0	0	0	0	0	0	0	0	0	0	0	0	0	0	0	0	0	0	0	0	0	0	0	0	0	0	0	0	0	0	0	0	0	0	0	0	0	Tinamus Stratum 2 & Neognathae Stratum 1	1176.94	0
20359	LIX1	0	0	0	0	0	0	0	0	0	0	0	0	0	0	0	0	0	0	0	0	0	0	0	0	0	0	0	0	0	0	0	0	0	0	0	0	0	0	0	0	0	0	0	0	0	Tinamus Stratum 2 & Neognathae Stratum 1	1176.94	0
20360	RIOK2	0	0	0	0	0	0	0	0	0	0	0	0	0	0	0	0	0	0	0	0	0	0	0	0	0	0	0	0	0	0	0	0	0	0	0	0	0	0	0	0	0	0	0	0	0	Tinamus Stratum 2 & Neognathae Stratum 1	1176.94	0
20361	RGMB	0	0	0	40.9	0	0	0	0	0	0	0	0	0	0	0	79	0	2	2	0	0	0	0	0	0	0	0	0	0	0	0	0	0	0	0	0	0	0	0	0	0	2	13	0	138.9	Tinamus Stratum 2 & Neognathae Stratum 1	1176.94	0.118018
20362	CHD1	0	0	0	0	0	77	0	37	40	21	0	0	0	0	0	0	79	2	2	0	43	43	1	35	0	3	0	6	40	13.7	3.34	3.34	6.46	7.2	7.2	2.6	3.9	26.3	4	38	1	2	13	0	561.04	Tinamus Stratum 2 & Neognathae Stratum 1	1176.94	0.476694
20363	FAM174A	0	0	0	0	0	0	0	0	0	0	0	0	0	0	0	0	0	0	0	0	0	0	0	0	0	0	0	0	0	0	0	0	0	0	0	0	0	0	0	0	0	0	0	0	0	Tinamus Stratum 2 & Neognathae Stratum 1	1176.94	0
20364	ST8SIA4	0	0	0	0	0	0	0	0	0	0	0	0	0	0	0	0	0	0	0	0	0	0	0	0	0	0	0	0	0	0	0	0	0	0	0	0	0	0	0	0	0	0	0	0	0	Tinamus Stratum 2 & Neognathae Stratum 1	1176.94	0
20365	SLCO4C1	0	0	0	0	0	0	0	0	0	0	0	0	0	0	0	0	0	0	0	0	0	0	0	0	0	0	0	0	0	0	0	0	0	0	0	0	0	0	0	0	0	0	0	0	0	Tinamus Stratum 2 & Neognathae Stratum 1	1176.94	0
20366	PAM	0	0	0	0	0	0	0	0	0	0	0	0	0	0	0	0	0	0	0	0	0	0	0	0	0	0	0	0	0	0	0	0	0	0	0	0	0	0	0	0	0	0	0	0	0	Tinamus Stratum 2 & Neognathae Stratum 1	1176.94	0
20367	GIN1	0	0	0	0	0	0	0	0	0	0	0	0	0	0	0	0	0	0	0	0	0	0	0	0	0	0	0	0	0	0	0	0	0	0	0	0	0	0	0	0	0	0	0	0	0	Tinamus Stratum 2 & Neognathae Stratum 1	1176.94	0
20368	PPIP5K2	0	0	0	0	0	0	0	0	0	0	0	0	0	0	0	0	0	0	0	0	0	0	0	0	0	0	0	0	0	0	0	0	0	0	0	0	0	0	0	0	0	0	0	0	0	Tinamus Stratum 2 & Neognathae Stratum 1	1176.94	0
20369	MACIR	0	0	0	40.9	0	0	0	0	0	0	0	0	0	0	0	0	79	2	2	0	0	0	0	0	0	0	0	0	0	13.7	3.34	3.34	6.46	7.2	7.2	2.6	3.9	26.3	4	38	1	2	13	0	255.94	Tinamus Stratum 2 & Neognathae Stratum 1	1176.94	0.217462
20370	NUDT12	0	0	0	0	0	0	0	0	0	0	0	0	0	0	0	0	0	0	0	0	0	0	0	0	0	0	0	0	0	0	0	0	0	0	0	0	0	0	0	0	0	0	0	0	0	Tinamus Stratum 2 & Neognathae Stratum 1	1176.94	0
20371	EFNA5	0	0	0	40.9	0	0	0	0	0	0	0	0	0	0	0	0	0	0	0	0	0	0	0	0	0	0	0	0	0	0	0	0	0	0	0	0	0	0	0	0	0	0	0	0	40.9	Tinamus Stratum 2 & Neognathae Stratum 1	1176.94	0.0347511
20372	FBXL17	0	0	0	0	0	0	0	0	0	0	0	0	0	0	0	0	0	0	0	0	0	0	0	0	0	0	0	0	0	0	0	0	0	0	0	0	0	0	0	0	0	0	0	0	0	Tinamus Stratum 2 & Neognathae Stratum 1	1176.94	0
20373	FER	0	0	0	0	0	0	0	0	0	0	0	0	0	0	0	0	0	0	0	0	0	0	0	0	0	0	0	0	0	0	0	0	0	0	0	0	0	0	0	0	0	0	0	0	0	Tinamus Stratum 2 & Neognathae Stratum 1	1176.94	0
20374	PJA2	0	0	0	0	0	0	0	0	0	0	0	0	0	0	0	0	0	0	0	0	0	0	0	0	0	0	0	0	0	0	0	0	0	0	0	0	0	0	0	0	0	0	0	0	0	Neognathae Stratum 1 & Tinamidae Stratum 1	1185.24	0
20375	MAN2A1	0	0	0	0	0	0	0	0	0	0	0	0	0	0	0	0	0	0	0	0	0	0	0	0	0	0	0	0	0	0	0	0	0	0	0	0	0	0	0	0	0	0	0	0	0	Neognathae Stratum 1 & Tinamidae Stratum 1	1185.24	0
20376	TMEM232	0	0	0	0	0	0	0	0	0	0	0	0	0	0	0	0	0	0	0	0	0	0	0	0	0	0	0	0	0	0	0	0	0	0	0	0	0	0	0	0	0	0	0	0	0	Neognathae Stratum 1 & Tinamidae Stratum 1	1185.24	0
20377	SLC25A46	0	0	0	0	0	0	0	0	0	0	0	0	0	0	0	0	0	0	0	0	0	0	0	0	0	0	0	0	0	0	0	0	0	0	0	0	0	0	0	0	0	0	0	0	0	Neognathae Stratum 1 & Tinamidae Stratum 1	1185.24	0
20378	WDR36	0	0	0	0	0	0	0	0	0	0	0	0	0	0	0	0	0	0	0	0	0	0	0	0	0	0	0	0	0	0	0	0	0	0	0	0	0	0	0	0	0	0	0	0	0	Neognathae Stratum 1 & Tinamidae Stratum 1	1185.24	0
20379	CAMK4	0	0	0	0	0	0	0	0	0	0	0	0	0	0	0	0	0	0	0	0	0	0	0	0	0	0	0	0	0	0	0	0	0	0	0	0	0	0	0	0	0	0	0	0	0	Neognathae Stratum 1 & Tinamidae Stratum 1	1185.24	0
20380	STARD4	0	0	0	0	0	0	0	0	0	0	0	0	0	0	0	0	0	0	0	0	0	0	0	0	0	0	0	0	0	0	0	0	0	0	0	0	0	0	0	0	0	0	0	0	0	Neognathae Stratum 1 & Tinamidae Stratum 1	1185.24	0
20381	NREP	0	0	0	0	0	0	0	0	0	0	0	0	0	0	0	0	0	0	0	0	0	0	0	0	0	0	0	0	0	0	0	0	0	0	0	0	0	0	0	0	0	0	0	0	0	Neognathae Stratum 1 & Tinamidae Stratum 1	1185.24	0
20382	EPB41L4A	0	0	0	0	0	0	0	0	0	0	0	0	0	0	0	0	0	0	0	0	0	0	0	0	0	0	0	0	0	0	0	0	0	0	0	0	0	0	0	0	0	0	0	0	0	Neognathae Stratum 1 & Tinamidae Stratum 1	1185.24	0
20383	APC	0	0	0	0	0	0	0	0	0	0	0	0	0	0	0	0	79	2	2	82	0	0	0	0	0	0	0	0	0	0	0	0	0	0	0	0	0	0	0	0	1	2	13	0	181	Neognathae Stratum 1 & Tinamidae Stratum 1	1185.24	0.152712
20384	SRP19	0	0	0	0	0	0	0	0	0	0	0	0	0	0	0	0	0	0	0	0	0	0	0	0	0	0	0	0	0	0	0	0	0	0	0	0	0	0	0	0	0	0	0	0	0	Neognathae Stratum 1 & Tinamidae Stratum 1	1185.24	0
20385	REEP5	0	0	0	0	0	0	0	0	0	0	0	0	0	0	0	0	0	0	0	0	0	0	0	0	0	0	0	0	0	0	0	0	0	0	0	0	0	0	0	0	0	0	0	0	0	Neognathae Stratum 1 & Tinamidae Stratum 1	1185.24	0
20386	DCP2	0	0	0	0	0	0	0	0	0	0	0	0	0	0	0	0	0	0	0	0	0	0	0	0	0	0	0	0	0	0	0	0	0	0	0	0	0	0	0	0	0	0	0	0	0	Neognathae Stratum 1 & Tinamidae Stratum 1	1185.24	0
20387	MCC	0	0	0	0	0	0	0	0	0	0	0	0	0	0	0	0	0	0	0	0	0	0	0	0	0	0	0	0	0	0	0	0	0	0	0	0	0	0	0	0	0	0	0	0	0	Neognathae Stratum 1 & Tinamidae Stratum 1	1185.24	0
20388	YTHDC2	0	0	0	0	0	0	0	0	0	0	0	0	0	0	0	0	0	0	0	0	0	0	0	0	0	0	0	0	0	0	0	0	0	0	0	0	0	0	0	0	0	0	0	0	0	Neognathae Stratum 1 & Tinamidae Stratum 1	1185.24	0
20389	KCNN2	0	0	0	0	0	0	0	0	0	0	0	0	0	0	0	0	0	0	0	0	0	0	0	0	0	0	0	0	0	0	0	0	0	0	0	0	0	0	0	0	0	0	0	0	0	Neognathae Stratum 1 & Tinamidae Stratum 1	1185.24	0
20390	TRIM36	0	0	0	0	0	0	0	0	0	0	0	0	0	0	0	0	0	0	0	0	0	0	0	0	0	0	0	0	0	0	0	0	0	0	0	0	0	0	0	0	0	0	0	0	0	Neognathae Stratum 1 & Tinamidae Stratum 1	1185.24	0
20391	PGGT1B	0	0	0	0	0	0	0	0	0	0	0	0	0	0	0	0	0	0	0	0	0	0	0	0	0	0	0	0	0	13.7	0	0	0	7.2	0	2.6	3.9	26.3	4	38	1	2	13	0	111.7	Neognathae Stratum 1 & Tinamidae Stratum 1	1185.24	0.0942425
20392	CCDC112	0	0	0	0	0	0	0	0	0	0	0	0	0	0	0	0	0	0	0	0	0	0	0	0	0	0	0	0	0	0	0	0	0	0	0	0	0	0	0	0	0	0	0	0	0	Neognathae Stratum 1 & Tinamidae Stratum 1	1185.24	0
20393	FEM1C	0	0	0	49.2	0	0	0	0	0	0	0	0	0	0	0	79	79	2	2	0	43	43	1	0	35	3	0	6	40	13.7	3.34	0	6.46	7.2	7.2	2.6	3.9	26.3	4	38	1	2	13	0	510.9	Neognathae Stratum 1 & Tinamidae Stratum 1	1185.24	0.431052
20394	TMED7	0	0	0	0	0	0	0	0	0	0	0	0	0	0	0	0	0	0	0	0	43	0	1	0	35	3	38	6	0	13.7	3.34	3.34	6.46	7.2	7.2	2.6	3.9	26.3	4	38	1	2	13	0	258.04	Neognathae Stratum 1 & Tinamidae Stratum 1	1185.24	0.217711
20395	TICAM2	0	0	0	0	0	0	0	0	0	0	0	0	0	0	0	0	0	0	0	0	0	0	0	0	0	0	0	0	0	0	0	0	0	0	0	0	0	0	0	0	0	0	0	0	0	Neognathae Stratum 1 & Tinamidae Stratum 1	1185.24	0
20396	CDO1	0	0	0	0	0	0	0	0	0	0	0	0	0	0	0	0	0	0	0	0	0	0	0	0	0	0	0	0	0	0	0	0	0	0	0	0	0	0	0	0	0	0	0	0	0	Neognathae Stratum 1 & Tinamidae Stratum 1	1185.24	0
20397	ATG12	0	0	0	0	0	0	0	0	0	0	0	0	0	0	0	0	0	0	0	0	0	0	0	0	0	0	0	0	0	0	0	0	0	0	0	0	0	0	0	0	0	0	0	0	0	Neognathae Stratum 1 & Tinamidae Stratum 1	1185.24	0
20398	AP3S1	0	0	0	0	0	0	0	0	0	0	0	0	0	0	0	79	0	2	2	0	0	0	0	0	0	0	0	0	0	0	0	0	0	0	0	0	0	0	0	0	0	2	13	0	98	Neognathae Stratum 1 & Tinamidae Stratum 1	1185.24	0.0826837
20399	LVRN	0	0	0	0	0	0	0	0	0	0	0	0	0	0	0	0	0	0	0	0	0	0	0	0	0	0	0	0	0	0	0	0	0	0	0	0	0	0	0	0	0	0	0	0	0	Neognathae Stratum 1 & Tinamidae Stratum 1	1185.24	0
20400	ARL14EPL	0	0	0	0	0	0	0	0	0	0	0	0	0	0	0	0	0	0	0	0	0	0	0	0	0	0	0	0	0	0	0	0	0	0	0	0	0	0	0	0	0	0	0	0	0	Neognathae Stratum 1 & Tinamidae Stratum 1	1185.24	0
20401	COMMD10	0	0	0	0	0	0	0	0	0	0	0	0	0	0	0	0	0	0	0	0	0	0	0	0	0	0	0	0	0	0	0	0	0	0	0	0	0	0	0	0	0	0	0	0	0	Neognathae Stratum 1 & Tinamidae Stratum 1	1185.24	0
20402	SEMA6A	0	0	0	0	0	0	0	0	0	0	0	0	0	0	0	0	0	0	0	0	0	0	0	0	0	0	0	0	0	0	0	0	0	0	0	0	0	0	0	0	0	0	0	0	0	Neognathae Stratum 1 & Tinamidae Stratum 1	1185.24	0
20403	DTWD2	0	0	0	0	0	0	0	0	0	0	0	0	0	0	0	0	0	0	0	0	0	0	0	0	0	0	0	0	0	0	0	0	0	0	0	0	0	0	0	0	0	0	0	0	0	Neognathae Stratum 1 & Tinamidae Stratum 1	1185.24	0
20404	DMXL1	0	0	0	0	0	0	0	0	0	0	0	0	0	0	0	0	0	0	0	0	0	0	0	0	0	0	0	0	0	0	0	0	0	0	0	0	0	0	0	0	0	0	0	0	0	Neognathae Stratum 1 & Tinamidae Stratum 1	1185.24	0
20405	TNFAIP8	0	0	0	0	0	0	0	0	0	0	0	0	0	0	0	0	0	0	0	0	0	0	0	0	0	0	0	0	0	0	0	0	0	0	0	0	0	0	0	0	0	0	0	0	0	Neognathae Stratum 1 & Tinamidae Stratum 1	1185.24	0
20406	HSD17B4	0	0	0	0	0	0	0	0	0	0	0	0	0	0	0	0	0	0	0	0	0	0	0	0	0	0	0	0	0	0	0	0	0	0	0	0	0	0	0	0	0	0	0	0	0	Neognathae Stratum 1 & Tinamidae Stratum 1	1185.24	0
20407	PRR16	0	0	0	0	0	0	0	0	0	0	0	0	0	0	0	0	0	0	0	0	0	0	0	0	0	0	0	0	0	0	0	0	0	0	0	0	0	0	0	0	0	0	0	0	0	Neognathae Stratum 1 & Tinamidae Stratum 1	1185.24	0
20408	SRFBP1	0	0	0	0	0	0	0	0	0	0	0	0	0	0	0	0	0	0	0	0	0	0	0	0	0	0	0	0	0	0	0	0	0	0	0	0	0	0	0	0	0	0	0	0	0	Neognathae Stratum 1 & Tinamidae Stratum 1	1185.24	0
20409	LOX	0	0	0	49.2	0	0	0	0	0	0	0	0	0	0	0	0	0	0	0	0	0	0	0	0	0	0	0	0	0	0	0	0	0	0	0	0	0	0	0	0	0	0	0	0	49.2	Neognathae Stratum 1 & Tinamidae Stratum 1	1185.24	0.0415106
20410	ZNF474	0	0	0	0	0	0	0	0	0	0	0	0	0	0	0	0	0	0	0	0	0	0	0	0	0	0	0	0	0	0	0	0	0	0	0	0	0	0	0	0	0	0	0	0	0	Neognathae Stratum 1 & Tinamidae Stratum 1	1185.24	0
20411	SNCAIP	0	0	0	0	0	0	0	0	0	0	0	0	0	0	0	0	0	0	0	0	0	0	0	0	0	0	0	0	0	0	0	0	0	0	0	0	0	0	0	0	0	0	0	0	0	Neognathae Stratum 1 & Tinamidae Stratum 1	1185.24	0
20412	SNX2	0	0	0	0	0	0	0	0	0	0	0	0	0	0	0	0	0	0	0	0	0	0	0	0	0	0	0	0	0	13.7	3.34	3.34	6.46	7.2	7.2	2.6	3.9	26.3	4	38	1	2	13	0	132.04	Neognathae Stratum 1 & Tinamidae Stratum 1	1185.24	0.111404
20413	SNX24	0	0	0	0	0	0	0	0	0	0	0	0	0	0	0	0	0	0	0	0	0	0	0	0	0	0	0	0	0	0	0	0	0	0	0	0	0	0	0	0	0	0	0	0	0	Neognathae Stratum 1 & Tinamidae Stratum 1	1185.24	0
20414	PPIC	0	0	0	0	0	0	0	0	0	0	0	0	0	0	0	0	0	0	0	0	0	0	0	0	0	0	0	0	0	0	0	0	0	0	0	0	0	0	0	0	0	0	0	0	0	Neognathae Stratum 1 & Tinamidae Stratum 1	1185.24	0
20415	PRDM6	0	0	0	0	0	0	0	0	0	0	0	0	0	0	0	0	0	0	0	0	0	0	0	0	0	0	0	0	0	0	0	0	0	0	0	0	0	0	0	0	0	0	0	0	0	Neognathae Stratum 1 & Tinamidae Stratum 1	1185.24	0
20416	CEP120	0	0	0	0	0	0	0	0	0	0	0	0	0	0	0	0	0	0	0	0	0	0	0	0	0	0	0	0	0	0	0	0	0	0	0	0	0	0	0	0	0	0	0	0	0	Neognathae Stratum 1 & Tinamidae Stratum 1	1185.24	0
20417	ZNF608	0	0	0	0	0	0	0	0	0	0	0	0	0	0	0	0	0	0	0	0	0	0	0	0	0	0	0	0	0	0	0	0	0	0	0	0	0	0	0	0	0	0	0	0	0	Neognathae Stratum 1 & Tinamidae Stratum 1	1185.24	0
20418	GRAMD2B	0	0	0	0	0	0	0	0	0	0	0	0	0	0	0	0	0	0	0	0	0	0	0	0	0	0	0	0	0	0	0	0	0	0	0	0	0	0	0	0	0	0	0	0	0	Neognathae Stratum 1 & Tinamidae Stratum 1	1185.24	0
20419	ALDH7A1	0	0	0	0	0	0	0	0	0	0	0	0	0	0	0	0	0	0	0	0	0	0	0	0	0	0	0	0	0	0	0	0	0	0	0	0	0	0	0	0	0	0	0	0	0	Neognathae Stratum 1 & Tinamidae Stratum 1	1185.24	0
20420	PHAX	0	0	0	0	0	0	0	0	0	0	0	0	0	0	0	0	0	0	0	0	0	0	0	0	0	0	0	0	0	0	0	0	0	0	0	0	0	0	0	0	0	0	0	0	0	Neognathae Stratum 1 & Tinamidae Stratum 1	1185.24	0
20421	TEX43	0	0	0	0	0	0	0	0	0	0	0	0	0	0	0	0	0	0	0	0	0	0	0	0	0	0	0	0	0	0	0	0	0	0	0	0	0	0	0	0	0	0	0	0	0	Neognathae Stratum 1 & Tinamidae Stratum 1	1185.24	0
20422	LMNB1	0	0	0	0	0	0	0	0	0	0	0	0	0	0	0	0	0	0	0	0	0	0	0	0	0	0	0	0	0	0	0	0	0	0	0	0	0	0	0	0	0	0	0	0	0	Neognathae Stratum 1 & Tinamidae Stratum 1	1185.24	0
20423	MARCHF3	0	0	0	0	0	0	0	0	0	0	0	0	0	0	0	0	0	0	0	0	0	0	0	0	0	0	0	0	0	0	0	0	0	0	0	0	0	0	0	0	0	0	0	0	0	Neognathae Stratum 1 & Tinamidae Stratum 1	1185.24	0
20424	C5orf63	0	0	0	0	0	0	0	0	0	0	0	0	0	0	0	0	0	0	0	0	0	0	0	0	0	0	0	0	0	0	0	0	0	0	0	0	0	0	0	0	0	0	0	0	0	Neognathae Stratum 1 & Tinamidae Stratum 1	1185.24	0
20425	MEGF10	0	0	0	0	0	0	0	0	0	0	0	0	0	0	0	0	0	0	0	0	0	0	0	0	0	0	0	0	0	0	0	0	0	0	0	0	0	0	0	0	0	0	0	0	0	Neognathae Stratum 1 & Tinamidae Stratum 1	1185.24	0
20426	PRRC1	0	0	0	0	0	0	0	0	0	0	0	0	0	0	0	0	0	0	0	0	0	0	0	0	0	0	0	0	0	0	0	0	0	0	0	0	0	0	0	0	0	0	0	0	0	Neognathae Stratum 1 & Tinamidae Stratum 1	1185.24	0
20427	CTXN3	0	0	0	0	0	0	0	0	0	0	0	0	0	0	0	0	0	0	0	0	0	0	0	0	0	0	0	0	0	0	0	0	0	0	0	0	0	0	0	0	0	0	0	0	0	Neognathae Stratum 1 & Tinamidae Stratum 1	1185.24	0
20428	SLC12A2	0	0	0	0	0	0	0	0	0	0	0	0	0	0	0	0	0	0	0	0	0	0	0	0	0	0	0	0	0	0	0	0	0	0	0	0	0	0	0	0	0	0	0	0	0	Neognathae Stratum 1 & Tinamidae Stratum 1	1185.24	0
20429	FBN2	0	0	0	0	0	0	0	0	0	0	0	0	0	0	0	0	0	0	0	0	0	0	0	0	0	0	0	0	0	0	0	0	0	0	0	0	0	0	0	0	0	0	0	0	0	Neognathae Stratum 1 & Tinamidae Stratum 1	1185.24	0
20430	SLC27A6	0	0	0	0	0	0	0	0	0	0	0	0	0	0	0	0	0	0	0	0	0	0	0	0	0	0	0	0	0	0	0	0	0	0	0	0	0	0	0	0	0	0	0	0	0	Neognathae Stratum 1 & Tinamidae Stratum 1	1185.24	0
20431	ISOC1	0	0	0	0	0	0	0	0	0	0	0	0	0	0	0	0	0	0	0	0	0	0	0	0	0	0	0	0	0	0	0	0	0	0	0	0	0	0	0	0	0	0	0	0	0	Neognathae Stratum 1 & Tinamidae Stratum 1	1185.24	0
20432	ADAMTS19	0	0	0	0	0	0	0	0	0	0	0	0	0	0	0	0	0	0	0	0	0	0	0	0	0	0	0	0	0	0	0	0	0	0	0	0	0	0	0	0	0	0	0	0	0	Neognathae Stratum 1 & Tinamidae Stratum 1	1185.24	0
20433	MINAR2	0	0	0	0	0	0	0	0	0	0	0	0	0	0	0	0	0	0	0	0	0	0	0	0	0	0	0	0	0	0	0	0	0	0	0	0	0	0	0	0	0	0	0	0	0	Neognathae Stratum 1 & Tinamidae Stratum 1	1185.24	0
20434	CHSY3	0	0	0	0	0	0	0	0	0	0	0	0	0	0	0	0	0	0	0	0	0	0	0	0	0	0	0	0	0	0	0	0	0	0	0	0	0	0	0	0	0	0	0	0	0	Neognathae Stratum 1 & Tinamidae Stratum 1	1185.24	0
20435	HINT1	0	0	0	0	0	0	37	37	40	21	0	0	0	0	0	0	0	0	0	0	43	43	1	35	35	3	0	6	0	13.7	0	3.34	6.46	7.2	7.2	2.6	3.9	26.3	4	38	1	2	13	0	429.7	Neognathae Stratum 1 & Tinamidae Stratum 1	1185.24	0.362543
20436	LYRM7	0	0	0	0	0	0	0	0	0	0	0	0	0	0	0	0	0	0	0	0	0	0	0	0	0	0	0	0	0	0	0	0	0	0	0	0	0	0	0	0	0	0	0	0	0	Neognathae Stratum 1 & Tinamidae Stratum 1	1185.24	0
20437	CDC42SE2	0	0	0	0	0	0	0	0	0	0	0	0	0	0	0	0	0	0	0	82	0	0	0	0	0	0	0	0	0	0	0	0	0	0	0	0	0	0	0	0	1	2	13	0	98	Neognathae Stratum 1 & Tinamidae Stratum 1	1185.24	0.0826837
20438	SPTLC1	0	0	0	0	0	0	0	0	0	0	0	0	0	0	0	0	0	0	0	0	0	0	0	0	0	0	0	0	0	0	0	0	0	0	0	0	0	0	0	0	0	0	0	0	0	Neognathae Stratum 1 & Tinamidae Stratum 1	1185.24	0
20439	ROR2	0	0	0	49.2	0	0	0	0	0	0	0	0	0	0	0	0	0	0	0	0	0	0	0	0	0	0	0	0	0	0	0	0	0	0	0	0	0	0	0	0	0	0	0	0	49.2	Neognathae Stratum 1 & Tinamidae Stratum 1	1185.24	0.0415106
20440	NFIL3	0	0	0	49.2	0	0	0	0	0	0	0	0	0	81	0	0	79	2	2	0	43	43	1	0	0	0	0	0	40	13.7	0	3.34	6.46	7.2	7.2	2.6	3.9	26.3	4	38	1	2	13	0	468.9	Neognathae Stratum 1 & Tinamidae Stratum 1	1185.24	0.395616
20441	AUH	0	0	0	0	0	0	0	0	0	0	0	0	0	0	0	0	0	0	0	0	0	0	0	0	0	0	0	0	0	0	0	0	0	0	0	0	0	0	0	0	0	0	0	0	0	Neognathae Stratum 1 & Tinamidae Stratum 1	1185.24	0
20442	TPPP2	0	0	0	0	0	0	0	0	0	0	0	0	0	0	0	0	0	0	0	0	0	0	0	0	0	0	0	0	0	0	0	0	0	0	0	0	0	0	0	0	0	0	0	0	0	Neognathae Stratum 1 & Tinamidae Stratum 1	1185.24	0
20443	SYK	0	0	0	0	0	0	0	0	0	0	0	0	0	0	0	0	0	0	0	0	0	0	0	0	0	0	0	0	0	0	0	0	0	0	0	0	0	0	0	0	0	0	0	0	0	Neognathae Stratum 1 & Tinamidae Stratum 1	1185.24	0
20444	DIRAS2	0	0	0	0	0	0	0	0	0	0	0	0	0	0	0	0	0	0	0	0	0	0	0	0	0	0	0	0	0	0	0	0	0	0	0	0	0	0	0	0	0	0	0	0	0	Neognathae Stratum 1 & Tinamidae Stratum 1	1185.24	0
20445	GADD45G	0	0	0	0	0	0	0	0	0	0	0	0	0	0	0	0	0	0	0	0	0	0	0	0	0	0	0	0	0	0	0	0	0	0	0	0	0	0	0	0	0	0	0	0	0	Neognathae Stratum 1 & Tinamidae Stratum 1	1185.24	0
20446	SEMA4D	0	0	0	0	0	0	0	0	0	0	0	0	0	0	0	0	0	0	0	0	0	0	0	0	0	0	0	0	0	0	0	0	0	0	0	0	0	0	0	0	0	0	0	0	0	Neognathae Stratum 1 & Tinamidae Stratum 1	1185.24	0
20447	SECISBP2	0	0	0	0	0	0	0	0	0	0	0	0	0	0	0	0	0	0	0	0	0	0	0	0	0	0	0	0	0	0	0	0	0	0	0	0	0	0	0	0	0	0	0	0	0	Neognathae Stratum 1 & Tinamidae Stratum 1	1185.24	0
20448	CKS2	0	0	0	0	0	0	0	0	0	0	0	0	0	0	0	0	0	0	0	0	0	0	0	0	0	0	0	0	0	0	0	0	0	0	0	0	0	0	0	0	0	0	0	0	0	Neognathae Stratum 1 & Tinamidae Stratum 1	1185.24	0
20449	SHC3	0	0	0	0	0	0	0	0	0	0	0	0	0	0	0	0	0	0	0	0	0	0	0	0	0	0	0	0	0	0	0	0	0	0	0	0	0	0	0	0	0	0	0	0	0	Neognathae Stratum 1 & Tinamidae Stratum 1	1185.24	0
20450	S1PR3	0	0	0	0	0	0	0	0	0	0	0	0	0	0	0	0	0	0	0	0	0	0	0	0	0	0	0	0	0	0	0	0	0	0	0	0	0	0	0	0	0	0	0	0	0	Neognathae Stratum 1 & Tinamidae Stratum 1	1185.24	0
20451	NXNL2	0	0	0	0	0	0	0	0	0	0	0	0	0	0	0	0	0	0	0	0	0	0	0	0	0	0	0	0	0	0	0	0	0	0	0	0	0	0	0	0	0	0	0	0	0	Neognathae Stratum 1 & Tinamidae Stratum 1	1185.24	0
20452	SPIN1	0	0	0	0	0	77	37	37	40	21	0	0	0	0	0	0	0	0	0	0	43	43	1	35	35	3	38	6	40	0	3.34	0	6.46	7.2	0	2.6	3.9	26.3	4	38	1	2	13	0	563.8	Neognathae Stratum 1 & Tinamidae Stratum 1	1185.24	0.475684
20453	CNTNAP4	0	0	0	0	0	0	0	0	0	0	0	0	0	0	0	0	0	0	0	0	0	0	0	0	0	0	0	0	0	0	0	0	0	0	0	0	0	0	0	0	0	0	0	0	0	Neognathae Stratum 1 & Tinamidae Stratum 1 & Ostrich Stratum 1	1260.24	0
20454	CFC1B	0	0	0	0	0	0	0	0	0	0	0	0	0	0	0	0	0	0	0	0	0	0	0	0	0	0	0	0	0	0	0	0	0	0	0	0	0	0	0	0	0	0	0	0	0	Neognathae Stratum 1 & Tinamidae Stratum 1 & Ostrich Stratum 1	1260.24	0
20455	PRXL2C	0	0	0	0	0	0	0	0	0	0	0	0	0	0	0	0	0	0	0	0	0	0	0	0	0	0	0	0	0	0	0	0	0	0	0	0	0	0	0	0	0	0	0	0	0	Neognathae Stratum 1 & Tinamidae Stratum 1 & Ostrich Stratum 1	1260.24	0
20456	CDC14B	0	0	0	0	0	0	0	0	0	0	0	0	0	0	0	0	0	0	0	0	0	0	0	0	0	0	0	0	0	0	0	0	0	0	0	0	0	0	0	0	0	0	0	0	0	Neognathae Stratum 1 & Tinamidae Stratum 1 & Ostrich Stratum 1	1260.24	0
20457	HABP4	0	0	0	0	0	0	0	0	0	0	0	0	0	0	0	0	0	0	0	0	0	0	0	0	0	0	0	0	0	0	0	0	0	0	0	0	0	0	0	0	0	0	0	0	0	Neognathae Stratum 1 & Tinamidae Stratum 1 & Ostrich Stratum 1	1260.24	0
20458	ZNF367	75	0	0	0	0	0	0	0	0	0	0	0	0	0	0	0	0	0	0	0	0	0	0	0	0	0	0	0	0	0	0	0	0	0	0	0	0	0	0	0	0	0	0	0	75	Neognathae Stratum 1 & Tinamidae Stratum 1 & Ostrich Stratum 1	1260.24	0.0595125
20459	SLC35D2	0	0	0	0	0	0	0	0	0	0	0	0	0	0	0	0	0	0	0	0	0	0	0	0	0	0	0	0	0	0	0	0	0	0	0	0	0	0	0	0	0	0	0	0	0	Neognathae Stratum 1 & Tinamidae Stratum 1 & Ostrich Stratum 1	1260.24	0
20460	HSD17B3	0	0	0	0	0	0	0	0	0	0	0	0	0	0	0	0	0	0	0	0	0	0	0	0	0	0	0	0	0	0	0	0	0	0	0	0	0	0	0	0	0	0	0	0	0	Neognathae Stratum 1 & Tinamidae Stratum 1 & Ostrich Stratum 1	1260.24	0
20461	ERCC6L2	75	0	0	0	0	0	0	0	0	0	0	0	0	0	0	0	0	0	0	0	0	0	0	0	0	0	0	0	0	0	0	0	0	0	0	0	0	0	0	0	0	0	0	0	75	Neognathae Stratum 1 & Tinamidae Stratum 1 & Ostrich Stratum 1	1260.24	0.0595125
20462	PTCH1	0	0	0	0	0	0	0	0	0	0	0	0	0	0	0	0	0	0	0	0	43	0	1	0	0	0	0	0	0	13.7	3.34	3.34	6.46	0	7.2	2.6	3.9	26.3	4	38	1	2	13	0	168.84	Neognathae Stratum 1 & Tinamidae Stratum 1 & Ostrich Stratum 1	1260.24	0.133974
20463	FANCC	0	0	0	0	0	0	0	0	0	0	0	0	0	0	0	0	0	0	0	0	0	0	0	0	0	0	0	0	0	0	0	0	0	0	0	0	0	0	0	0	0	0	0	0	0	Neognathae Stratum 1 & Tinamidae Stratum 1 & Ostrich Stratum 1	1260.24	0
20464	AOPEP	0	0	0	0	0	0	0	0	0	0	0	0	0	0	0	0	0	0	0	0	0	0	0	0	0	0	0	0	0	0	0	0	0	0	0	0	0	0	0	0	0	0	0	0	0	Neognathae Stratum 1 & Tinamidae Stratum 1 & Ostrich Stratum 1	1260.24	0
20465	FBP1	0	0	0	0	0	0	0	0	0	0	0	0	0	0	0	0	0	0	0	0	0	0	0	0	0	0	0	0	0	0	0	0	0	0	0	0	0	0	0	0	0	0	0	0	0	Neognathae Stratum 1 & Tinamidae Stratum 1 & Ostrich Stratum 1	1260.24	0
20466	FBP2	0	0	0	0	0	0	0	0	0	0	0	0	0	0	0	0	0	0	0	0	0	0	0	0	0	0	0	0	0	0	0	0	0	0	0	0	0	0	0	0	0	0	0	0	0	Neognathae Stratum 1 & Tinamidae Stratum 1 & Ostrich Stratum 1	1260.24	0
20467	CTSL	0	0	0	0	0	0	0	0	0	0	0	0	0	0	0	0	0	0	0	0	0	0	0	0	0	0	0	0	0	0	0	0	0	0	0	0	0	0	0	0	0	0	0	0	0	Neognathae Stratum 1 & Tinamidae Stratum 1 & Ostrich Stratum 1	1260.24	0
20468	DAPK1	75	0	0	0	0	0	0	0	0	0	0	0	0	0	0	0	0	0	0	0	0	0	0	0	0	0	0	0	0	0	0	0	0	0	0	0	0	0	0	0	0	0	0	0	75	Neognathae Stratum 1 & Tinamidae Stratum 1 & Ostrich Stratum 1	1260.24	0.0595125
20469	GAS1	75	0	0	0	0	0	0	0	0	0	0	0	0	0	0	0	0	0	0	0	0	0	0	0	0	0	0	0	0	0	0	0	0	0	0	0	0	0	0	0	0	0	0	0	75	Neognathae Stratum 1 & Tinamidae Stratum 1 & Ostrich Stratum 1	1260.24	0.0595125
20470	TUT7	75	0	0	0	0	0	0	0	0	0	0	0	0	0	0	0	0	0	0	0	0	0	0	0	0	0	0	0	0	0	0	0	0	0	0	0	0	0	0	0	0	0	0	0	75	Neognathae Stratum 1 & Tinamidae Stratum 1 & Ostrich Stratum 1	1260.24	0.0595125
20471	ISCA1	75	0	0	0	0	0	0	0	0	0	0	0	0	0	0	0	0	0	0	0	0	0	0	0	0	0	0	0	0	0	0	0	0	0	0	0	0	0	0	0	0	0	0	0	75	Neognathae Stratum 1 & Tinamidae Stratum 1 & Ostrich Stratum 1	1260.24	0.0595125
20472	GOLM1	75	0	0	0	0	0	0	0	0	0	0	0	0	0	0	0	0	0	0	0	0	0	0	0	0	0	0	0	0	0	0	0	0	0	0	0	0	0	0	0	0	0	0	0	75	Neognathae Stratum 1 & Tinamidae Stratum 1 & Ostrich Stratum 1	1260.24	0.0595125
20473	NAA35	0	0	0	0	0	0	0	0	0	0	0	0	0	0	0	0	0	0	0	0	0	0	0	0	0	0	0	0	0	0	0	0	0	0	0	0	0	0	0	0	0	0	0	0	0	Neognathae Stratum 1 & Tinamidae Stratum 1 & Ostrich Stratum 1	1260.24	0
20474	AGTPBP1	0	0	0	0	0	0	0	0	0	0	0	0	0	0	0	0	0	0	0	0	0	0	0	0	0	0	0	0	0	0	0	0	0	0	0	0	0	0	0	0	0	0	0	0	0	Neognathae Stratum 1 & Tinamidae Stratum 1 & Ostrich Stratum 1	1260.24	0
20475	NTRK2	75	0	0	0	0	0	0	0	0	0	0	0	0	0	0	0	0	0	0	0	43	0	1	0	0	0	0	0	0	13.7	3.34	3.34	6.46	7.2	7.2	2.6	3.9	26.3	4	38	1	2	13	0	251.04	Neognathae Stratum 1 & Tinamidae Stratum 1 & Ostrich Stratum 1	1260.24	0.1992
20476	SLC28A3	0	0	0	0	0	0	0	0	0	0	0	0	0	0	0	0	0	0	0	0	0	0	0	0	0	0	0	0	0	0	0	0	0	0	0	0	0	0	0	0	0	0	0	0	0	Neognathae Stratum 1 & Tinamidae Stratum 1 & Ostrich Stratum 1	1260.24	0
20477	RMI1	75	0	0	0	0	0	0	0	0	0	0	0	0	0	0	0	0	0	0	0	0	0	0	0	0	0	0	0	0	0	0	0	0	0	0	0	0	0	0	0	0	0	0	0	75	Neognathae Stratum 1 & Tinamidae Stratum 1 & Ostrich Stratum 1	1260.24	0.0595125
20478	HNRNPK	0	0	0	0	0	77	0	37	40	21	0	0	0	0	0	0	0	0	0	0	43	43	1	35	0	3	38	6	40	0	3.34	3.34	6.46	7.2	7.2	2.6	3.9	26.3	4	38	1	2	13	0	502.34	Neognathae Stratum 1 & Tinamidae Stratum 1 & Ostrich Stratum 1	1260.24	0.398607
20479	C9orf64	0	0	0	0	0	0	0	0	0	0	0	0	0	0	0	0	0	0	0	0	0	0	0	0	0	0	0	0	0	0	0	0	0	0	0	0	0	0	0	0	0	0	0	0	0	Neognathae Stratum 1 & Tinamidae Stratum 1 & Ostrich Stratum 1	1260.24	0
20480	KIF27	0	0	0	0	0	0	0	0	0	0	0	0	0	0	0	0	0	0	0	0	0	0	0	0	0	0	0	0	0	0	0	0	0	0	0	0	0	0	0	0	0	0	0	0	0	Neognathae Stratum 1 & Tinamidae Stratum 1 & Ostrich Stratum 1	1260.24	0
20481	GKAP1	0	0	0	0	0	0	0	0	0	0	0	0	0	0	0	0	0	0	0	0	0	0	0	0	0	0	0	0	0	0	0	0	0	0	0	0	0	0	0	0	0	0	0	0	0	Neognathae Stratum 1 & Tinamidae Stratum 1 & Ostrich Stratum 1	1260.24	0
20482	UBQLN1	0	0	0	49.2	0	0	0	0	0	0	0	0	0	0	0	0	0	0	0	82	43	43	1	0	0	0	0	0	0	13.7	3.34	3.34	6.46	7.2	7.2	2.6	3.9	26.3	4	38	1	2	13	0	350.24	Neognathae Stratum 1 & Tinamidae Stratum 1 & Ostrich Stratum 1	1260.24	0.277915
20483	IDNK	0	0	0	0	0	0	0	0	0	0	0	0	0	0	0	0	0	0	0	0	0	0	0	0	0	0	0	0	0	0	0	0	0	0	0	0	0	0	0	0	0	0	0	0	0	Neognathae Stratum 1 & Tinamidae Stratum 1 & Ostrich Stratum 1	1260.24	0
20484	FRMD3	0	0	0	0	0	0	0	0	0	0	0	0	0	0	0	0	0	0	0	0	0	0	0	0	0	0	0	0	0	0	0	0	0	0	0	0	0	0	0	0	0	0	0	0	0	Neognathae Stratum 1 & Tinamidae Stratum 1 & Ostrich Stratum 1	1260.24	0
20485	RASEF	75	0	0	0	0	0	0	0	0	0	0	0	0	0	0	0	0	0	0	0	0	0	0	0	0	0	0	0	0	0	0	0	0	0	0	0	0	0	0	0	0	0	0	0	75	Neognathae Stratum 1 & Tinamidae Stratum 1 & Ostrich Stratum 1 & Emu Stratum 1	1283.14	0.0584504
20486	TLE1	0	0	0	0	0	0	0	0	0	0	0	0	0	0	0	0	0	0	0	0	0	0	0	0	0	0	0	0	0	0	0	0	0	0	0	0	0	0	0	0	0	0	0	0	0	Neognathae Stratum 1 & Tinamidae Stratum 1 & Ostrich Stratum 1 & Emu Stratum 1	1283.14	0
20487	TLE4	0	0	0	0	0	0	0	0	0	0	0	0	0	0	0	0	0	0	0	0	0	0	0	0	0	0	0	0	0	0	0	0	0	0	0	0	0	0	0	0	0	0	0	0	0	Neognathae Stratum 1 & Tinamidae Stratum 1 & Ostrich Stratum 1 & Emu Stratum 1	1283.14	0
20488	PSAT1	0	0	0	0	0	0	0	0	0	0	0	0	0	0	0	0	0	0	0	0	0	0	0	0	0	0	0	0	0	0	0	0	0	0	0	0	0	0	0	0	0	0	0	0	0	Neognathae Stratum 1 & Tinamidae Stratum 1 & Ostrich Stratum 1 & Emu Stratum 1	1283.14	0
20489	CEP78	0	0	0	0	0	0	0	0	0	0	0	0	0	0	0	0	0	0	0	0	0	0	0	0	0	0	0	0	0	0	0	0	0	0	0	0	0	0	0	0	0	0	0	0	0	Neognathae Stratum 1 & Tinamidae Stratum 1 & Ostrich Stratum 1 & Emu Stratum 1	1283.14	0
20490	GNAQ	0	0	0	0	0	0	0	0	0	0	0	0	0	0	0	0	0	0	0	0	43	43	1	35	35	3	38	6	40	13.7	3.34	0	6.46	7.2	0	2.6	3.9	26.3	4	38	1	2	13	0	365.5	Neognathae Stratum 1 & Tinamidae Stratum 1 & Ostrich Stratum 1 & Emu Stratum 1	1283.14	0.284848
20491	GNA14	0	0	0	0	0	0	0	0	0	0	0	0	0	0	0	0	0	0	0	0	0	0	0	0	0	0	0	0	0	0	0	0	0	0	0	0	0	0	0	0	0	0	0	0	0	Neognathae Stratum 1 & Tinamidae Stratum 1 & Ostrich Stratum 1 & Emu Stratum 1	1283.14	0
20492	VPS13A	0	0	0	0	0	0	0	0	0	0	0	0	0	0	0	0	0	0	0	0	0	0	0	0	0	0	0	0	0	0	0	0	0	0	0	0	0	0	0	0	0	0	0	0	0	Neognathae Stratum 1 & Tinamidae Stratum 1 & Ostrich Stratum 1 & Emu Stratum 1	1283.14	0
20493	FOXB2	0	0	0	0	0	0	0	0	0	0	0	0	0	0	0	0	0	0	0	0	0	0	0	0	0	0	0	0	0	0	0	0	0	0	0	0	0	0	0	0	0	0	0	0	0	Neognathae Stratum 1 & Tinamidae Stratum 1 & Ostrich Stratum 1 & Emu Stratum 1	1283.14	0
20494	PRUNE2	0	0	0	0	0	0	0	0	0	0	0	0	0	0	0	0	0	0	0	0	0	0	0	0	0	0	0	0	0	0	0	0	0	0	0	0	0	0	0	0	0	0	0	0	0	Neognathae Stratum 1 & Tinamidae Stratum 1 & Ostrich Stratum 1 & Emu Stratum 1	1283.14	0
20495	GCNT1	0	0	0	0	0	0	0	0	0	0	0	0	0	0	0	0	0	0	0	0	0	0	0	0	0	0	0	0	0	0	0	0	0	0	0	0	0	0	0	0	0	0	0	0	0	Neognathae Stratum 1 & Tinamidae Stratum 1 & Ostrich Stratum 1 & Emu Stratum 1	1283.14	0
20496	RFK	0	0	0	0	0	0	0	0	0	0	0	0	0	81	0	0	0	0	2	0	0	0	0	0	0	0	0	0	0	0	0	0	0	0	0	0	0	0	0	0	0	2	13	0	98	Neognathae Stratum 1 & Tinamidae Stratum 1 & Ostrich Stratum 1 & Emu Stratum 1	1283.14	0.0763751
20497	PCSK5	0	0	0	0	0	0	0	0	0	0	0	0	0	0	0	79	0	2	2	0	0	0	0	0	0	0	0	0	0	0	0	0	0	0	0	0	0	0	0	0	0	2	13	0	98	Neognathae Stratum 1 & Tinamidae Stratum 1 & Ostrich Stratum 1 & Emu Stratum 1	1283.14	0.0763751
20498	OSTF1	75	0	0	0	0	0	0	0	0	0	0	0	0	0	0	0	0	0	0	0	0	0	0	0	0	0	0	0	0	0	0	0	0	0	0	0	0	0	0	0	0	0	0	0	75	Neognathae Stratum 1 & Tinamidae Stratum 1 & Ostrich Stratum 1 & Emu Stratum 1	1283.14	0.0584504
20499	NMRK1	0	0	0	0	0	0	0	0	0	0	0	0	0	0	0	0	0	0	0	0	0	0	0	0	0	0	0	0	0	0	0	0	0	0	0	0	0	0	0	0	0	0	0	0	0	Neognathae Stratum 1 & Tinamidae Stratum 1 & Ostrich Stratum 1 & Emu Stratum 1	1283.14	0
20500	CARNMT1	75	0	0	0	0	0	0	0	0	0	0	0	0	0	0	0	0	0	0	0	0	0	0	0	0	0	0	0	0	0	0	0	0	0	0	0	0	0	0	0	0	0	0	0	75	Neognathae Stratum 1 & Tinamidae Stratum 1 & Ostrich Stratum 1 & Emu Stratum 1	1283.14	0.0584504
20501	C9orf40	0	0	0	0	0	0	0	0	0	0	0	0	0	0	0	0	0	0	0	0	0	0	0	0	0	0	0	0	0	0	0	0	0	0	0	0	0	0	0	0	0	0	0	0	0	Neognathae Stratum 1 & Tinamidae Stratum 1 & Ostrich Stratum 1 & Emu Stratum 1	1283.14	0
20502	TRPM6	0	0	0	0	0	0	0	0	0	0	0	0	0	0	0	0	0	0	0	0	0	0	0	0	0	0	0	0	0	0	0	0	0	0	0	0	0	0	0	0	0	0	0	0	0	Neognathae Stratum 1 & Tinamidae Stratum 1 & Ostrich Stratum 1 & Emu Stratum 1	1283.14	0
20503	RORB	75	0	0	0	0	0	0	0	0	0	0	0	0	0	0	0	0	0	0	0	0	0	0	0	0	0	0	0	0	0	0	0	0	0	0	0	0	0	0	0	0	0	0	0	75	Neognathae Stratum 1 & Tinamidae Stratum 1 & Ostrich Stratum 1 & Emu Stratum 1	1283.14	0.0584504
20504	ANXA1	0	0	0	0	0	0	0	0	0	0	0	0	0	0	0	0	0	0	0	0	0	0	0	0	0	0	0	0	0	0	0	0	0	0	0	0	0	0	0	0	0	0	0	0	0	Neognathae Stratum 1 & Tinamidae Stratum 1 & Ostrich Stratum 1 & Emu Stratum 1	1283.14	0
20505	ALDH1A1	0	0	0	0	0	0	0	0	0	0	0	0	0	0	0	0	0	0	0	0	0	0	0	0	0	0	0	0	0	0	0	0	0	0	0	0	0	0	0	0	0	0	0	0	0	Neognathae Stratum 1 & Tinamidae Stratum 1 & Ostrich Stratum 1 & Emu Stratum 1	1283.14	0
20506	TMC1	0	0	0	0	0	0	0	0	0	0	0	0	0	0	0	0	0	0	0	0	0	0	0	0	0	0	0	0	0	0	0	0	0	0	0	0	0	0	0	0	0	0	0	0	0	Neognathae Stratum 1 & Tinamidae Stratum 1 & Ostrich Stratum 1 & Emu Stratum 1	1283.14	0
20507	ZFAND5	75	0	0	0	0	0	0	0	0	0	0	0	0	0	0	0	0	0	0	0	0	43	1	35	0	3	38	6	40	0	3.34	0	6.46	7.2	0	2.6	3.9	26.3	4	38	1	2	13	0	348.8	Neognathae Stratum 1 & Tinamidae Stratum 1 & Ostrich Stratum 1 & Emu Stratum 1	1283.14	0.271833
20508	GDA	0	0	0	0	0	0	0	0	0	0	0	0	0	0	0	0	0	0	0	0	0	0	0	0	0	0	0	0	0	0	0	0	0	0	0	0	0	0	0	0	0	0	0	0	0	Neognathae Stratum 1 & Tinamidae Stratum 1 & Ostrich Stratum 1 & Emu Stratum 1	1283.14	0
20509	C9orf85	0	0	0	0	0	0	0	0	0	0	0	0	0	0	0	0	0	0	0	0	0	0	0	0	0	0	0	0	0	0	0	0	0	0	0	0	0	0	0	0	0	0	0	0	0	Neognathae Stratum 1 & Tinamidae Stratum 1 & Ostrich Stratum 1 & Emu Stratum 1	1283.14	0
20510	ABHD17B	0	0	0	0	0	0	0	0	0	0	0	0	0	0	0	79	0	2	2	0	0	0	0	0	0	0	0	0	0	0	0	0	0	0	0	0	0	0	0	0	0	2	13	0	98	Neognathae Stratum 1 & Tinamidae Stratum 1 & Ostrich Stratum 1 & Emu Stratum 1	1283.14	0.0763751
20511	CEMIP2	75	0	0	0	0	0	0	0	0	0	0	0	0	0	0	0	0	0	0	0	0	0	0	0	0	0	0	0	0	0	0	0	0	0	0	0	0	0	0	0	0	0	0	0	75	Neognathae Stratum 1 & Tinamidae Stratum 1 & Ostrich Stratum 1 & Emu Stratum 1	1283.14	0.0584504
20512	TRPM3	75	0	0	0	0	0	0	0	0	0	0	0	0	0	0	0	0	0	0	0	0	0	0	0	0	0	0	0	0	0	0	0	0	0	0	0	0	0	0	0	0	0	0	0	75	Neognathae Stratum 1 & Tinamidae Stratum 1 & Ostrich Stratum 1 & Emu Stratum 1	1283.14	0.0584504
20513	KLF9	0	0	0	0	0	0	0	0	0	0	0	0	0	0	0	0	0	0	0	0	0	0	0	0	0	0	0	0	0	0	0	0	0	0	0	0	0	0	0	0	0	0	0	0	0	Neognathae Stratum 1 & Tinamidae Stratum 1 & Ostrich Stratum 1 & Emu Stratum 1	1283.14	0
20514	SMC5	75	0	0	0	0	0	0	0	0	0	0	0	0	0	0	0	0	0	0	0	0	0	0	0	0	0	0	0	0	0	0	0	0	0	0	0	0	0	0	0	0	0	0	0	75	Neognathae Stratum 1 & Tinamidae Stratum 1 & Ostrich Stratum 1 & Emu Stratum 1	1283.14	0.0584504
20515	MAMDC2	0	0	0	0	0	0	0	0	0	0	0	0	0	0	0	0	0	0	0	0	0	0	0	0	0	0	0	0	0	0	0	0	0	0	0	0	0	0	0	0	0	0	0	0	0	Neognathae Stratum 1 & Tinamidae Stratum 1 & Ostrich Stratum 1 & Emu Stratum 1	1283.14	0
20516	PTAR1	0	0	0	0	0	0	0	0	0	0	0	0	0	0	0	0	0	0	0	0	0	0	0	0	0	0	0	0	0	0	0	0	0	0	0	0	0	0	0	0	0	0	0	0	0	Neognathae Stratum 1 & Tinamidae Stratum 1 & Ostrich Stratum 1 & Emu Stratum 1	1283.14	0
20517	APBA1	0	0	0	0	0	0	0	0	0	0	0	0	0	0	0	0	0	0	0	0	0	0	0	0	0	0	0	0	40	13.7	3.34	3.34	6.46	7.2	7.2	2.6	3.9	26.3	4	38	1	2	13	13	185.04	Avian Stratum 0	1443.04	0.128229
20518	FAM189A2	0	0	0	0	0	0	0	0	0	0	0	0	0	0	0	0	0	0	0	0	0	0	0	0	0	0	0	0	0	0	0	0	0	0	0	0	0	0	0	0	0	0	0	0	0	Avian Stratum 0	1443.04	0
20519	TJP2	0	0	0	0	0	0	0	0	0	0	0	0	0	0	0	0	0	0	0	0	0	0	0	0	0	0	0	0	0	0	0	0	0	0	0	0	0	0	0	0	0	0	0	0	0	Avian Stratum 0	1443.04	0
20520	FXN	0	0	0	0	0	0	0	0	0	0	0	0	0	0	0	0	0	0	0	0	0	0	0	0	0	0	0	0	0	0	0	0	0	0	0	0	0	0	0	0	0	0	0	0	0	Avian Stratum 0	1443.04	0
20521	PIP5K1B	0	0	0	0	0	0	0	0	0	0	0	0	0	0	0	0	0	0	0	0	0	0	0	0	0	0	0	0	0	0	0	0	0	0	0	0	0	0	0	0	0	0	0	0	0	Avian Stratum 0	1443.04	0
20522	TMEM252	0	0	0	0	0	0	0	0	0	0	0	0	0	0	0	0	0	0	0	0	0	0	0	0	0	0	0	0	0	0	0	0	0	0	0	0	0	0	0	0	0	0	0	0	0	Avian Stratum 0	1443.04	0
20523	PGM5	0	0	0	0	0	0	0	0	0	0	0	0	0	0	0	0	0	0	0	0	0	0	0	0	0	0	0	0	0	0	0	0	0	0	0	0	0	0	0	0	0	0	0	0	0	Avian Stratum 0	1443.04	0
20524	CBWD1	0	0	0	0	0	0	0	0	0	0	0	0	0	0	0	0	0	0	0	0	0	0	0	0	0	0	0	0	0	0	0	0	0	0	0	0	0	0	0	0	0	0	0	0	0	Avian Stratum 0	1443.04	0
20525	DOCK8	0	0	0	0	0	0	0	0	0	0	0	0	0	0	0	0	0	0	0	0	0	0	0	0	0	0	0	0	0	0	0	0	0	0	0	0	0	0	0	0	0	0	0	0	0	Avian Stratum 0	1443.04	0
20526	KANK1	0	0	0	0	0	0	0	0	0	0	0	0	0	0	0	0	0	0	0	0	0	0	0	0	0	0	0	0	0	0	0	0	0	0	0	0	0	0	0	0	0	0	0	0	0	Avian Stratum 0	1443.04	0
20527	DMRT1	0	0	0	0	0	0	0	0	0	0	0	0	0	0	0	0	0	0	0	0	0	0	0	0	0	0	0	0	0	0	0	0	0	0	0	0	0	0	0	0	0	0	0	0	0	Avian Stratum 0	1443.04	0
20528	DMRT3	0	0	0	0	0	0	0	0	0	0	0	0	0	0	0	0	0	0	0	0	0	0	0	0	0	0	0	0	0	0	0	0	0	0	0	0	0	0	0	0	0	0	0	0	0	Avian Stratum 0	1443.04	0
20529	DMRT2	0	0	0	0	0	0	0	0	0	0	0	0	0	0	0	0	0	0	0	0	0	0	0	0	0	0	0	0	0	0	0	0	0	0	0	0	0	0	0	0	0	0	0	0	0	Avian Stratum 0	1443.04	0
20530	SMARCA2	0	0	0	0	0	0	0	0	0	0	0	0	0	0	0	0	0	0	0	0	0	0	0	0	0	0	0	0	0	0	0	0	0	0	0	0	0	0	0	0	0	0	0	0	0	Avian Stratum 0	1443.04	0
20531	VLDLR	0	0	0	0	0	0	0	0	0	0	0	0	0	0	0	0	0	0	0	0	0	0	0	0	0	0	0	0	0	0	0	0	0	0	0	0	0	0	0	0	0	0	0	0	0	Avian Stratum 0	1443.04	0
20532	KCNV2	0	0	0	0	0	0	0	0	0	0	0	0	0	0	0	0	0	0	0	0	0	0	0	0	0	0	0	0	0	0	0	0	0	0	0	0	0	0	0	0	0	0	0	0	0	Avian Stratum 0	1443.04	0
20533	PUM3	0	0	0	0	0	0	0	0	0	0	0	0	0	0	0	0	0	0	0	0	0	0	0	0	0	0	0	0	0	0	0	0	0	0	0	0	0	0	0	0	0	0	0	0	0	Avian Stratum 0	1443.04	0
20534	RFX3	0	0	0	0	0	0	0	0	0	0	0	0	0	0	0	0	0	0	0	0	43	43	1	35	35	3	38	6	40	13.7	0	0	0	7.2	7.2	2.6	3.9	26.3	4	38	1	2	13	13	375.9	Avian Stratum 0	1443.04	0.260492
20535	GLIS3	0	0	0	0	0	0	0	0	0	0	0	0	0	0	0	0	0	0	0	0	0	0	0	0	0	0	0	0	0	0	0	0	0	0	0	0	0	0	0	0	0	0	0	0	0	Avian Stratum 0	1443.04	0
20536	SLC1A1	0	0	0	0	0	0	0	0	0	0	0	0	0	0	0	0	0	0	0	0	0	0	0	0	0	0	0	0	0	0	0	0	0	0	0	0	0	0	0	0	0	0	0	0	0	Avian Stratum 0	1443.04	0
20537	CDC37L1	0	0	0	0	0	0	0	0	0	0	0	0	0	0	0	0	0	0	0	0	0	43	1	0	35	3	0	6	40	13.7	0	3.34	6.46	7.2	7.2	2.6	3.9	26.3	4	38	1	2	13	13	269.7	Avian Stratum 0	1443.04	0.186897
20538	AK3	0	0	0	0	0	0	0	0	0	0	0	0	0	0	0	0	0	0	0	0	0	0	0	0	0	0	0	0	0	0	0	0	0	0	0	0	0	0	0	0	0	0	0	0	0	Avian Stratum 0	1443.04	0
20539	RCL1	0	0	0	0	0	0	0	0	0	0	0	0	0	0	0	0	0	0	0	0	0	0	0	0	0	0	0	0	0	0	0	0	0	0	0	0	0	0	0	0	0	0	0	0	0	Avian Stratum 0	1443.04	0
20540	JAK2	0	0	0	0	0	0	0	0	0	0	0	0	0	0	0	0	0	0	0	0	0	0	0	0	0	0	0	0	0	0	0	0	0	0	0	0	0	0	0	0	0	0	0	0	0	Avian Stratum 0	1443.04	0
20541	RLN3	0	0	0	0	0	0	0	0	0	0	0	0	0	0	0	0	0	0	0	0	0	0	0	0	0	0	0	0	0	0	0	0	0	0	0	0	0	0	0	0	0	0	0	0	0	Avian Stratum 0	1443.04	0
20542	PLGRKT	0	0	0	0	0	0	0	0	0	0	0	0	0	0	0	0	0	0	0	0	0	0	0	0	0	0	0	0	0	0	0	0	0	0	0	0	0	0	0	0	0	0	0	0	0	Avian Stratum 0	1443.04	0
20543	CD274	0	0	0	0	0	0	0	0	0	0	0	0	0	0	0	0	0	0	0	0	0	0	0	0	0	0	0	0	0	0	0	0	0	0	0	0	0	0	0	0	0	0	0	0	0	Avian Stratum 0	1443.04	0
20544	RIC1	0	0	0	0	0	0	0	0	0	0	0	0	0	0	0	0	0	0	0	0	0	0	0	0	0	0	0	0	0	0	0	0	0	0	0	0	0	0	0	0	0	0	0	0	0	Avian Stratum 0	1443.04	0
20545	ERMP1	0	0	0	0	0	0	0	0	0	0	0	0	0	0	0	0	0	0	0	0	0	0	0	0	0	0	0	0	0	0	0	0	0	0	0	0	0	0	0	0	0	0	0	0	0	Avian Stratum 0	1443.04	0
20546	SLC16A7	0	0	0	0	0	0	0	0	0	0	0	0	0	0	0	0	0	0	0	0	0	0	0	0	0	0	0	0	0	0	0	0	0	0	0	0	0	0	0	0	0	0	0	0	0	Avian Stratum 0	1443.04	0
20547	MLANA	0	0	0	0	0	0	0	0	0	0	0	0	0	0	0	0	0	0	0	0	0	0	0	0	0	0	0	0	0	0	0	0	0	0	0	0	0	0	0	0	0	0	0	0	0	Avian Stratum 0	1443.04	0
20548	KIAA2026	0	0	0	0	0	0	0	0	0	0	0	0	0	0	0	0	0	0	0	0	0	0	0	0	0	0	0	0	0	0	0	0	0	0	0	0	0	0	0	0	0	0	0	0	0	Avian Stratum 0	1443.04	0
20549	UHRF2	0	0	0	0	0	0	0	0	0	0	0	0	0	0	0	0	0	0	0	0	0	0	0	0	0	0	0	0	0	13.7	3.34	3.34	6.46	7.2	7.2	2.6	3.9	26.3	4	38	1	2	13	13	145.04	Avian Stratum 0	1443.04	0.10051
20550	GLDC	0	0	0	0	0	0	0	0	0	0	0	0	0	0	0	0	0	0	0	0	0	0	0	0	0	0	0	0	0	0	0	0	0	0	0	0	0	0	0	0	0	0	0	0	0	Avian Stratum 0	1443.04	0
20551	KDM4C	0	0	0	0	0	0	0	0	0	0	0	0	0	0	0	0	0	0	0	0	0	0	0	0	0	0	0	0	0	0	0	0	0	0	0	0	0	0	0	0	0	0	0	0	0	Avian Stratum 0	1443.04	0
20552	PTPRD	0	0	0	0	0	0	0	0	0	0	0	0	0	0	0	0	0	0	0	0	0	0	0	0	0	0	0	0	0	0	0	0	0	0	0	0	0	0	0	0	0	0	0	0	0	Avian Stratum 0	1443.04	0
20553	TYRP1	0	0	0	0	0	0	0	0	0	0	0	0	0	0	0	0	0	0	0	0	0	0	0	0	0	0	0	0	0	0	0	0	0	0	0	0	0	0	0	0	0	0	0	0	0	Avian Stratum 0	1443.04	0
20554	LURAP1L	0	0	0	0	0	0	0	0	0	0	0	0	0	0	0	0	0	0	0	0	0	0	0	0	0	0	0	0	0	0	0	0	0	0	0	0	0	0	0	0	0	0	0	0	0	Avian Stratum 0	1443.04	0
20555	MPDZ	0	0	0	0	0	0	0	0	0	0	0	0	0	0	0	0	0	0	0	0	0	0	0	0	0	0	0	0	0	0	0	0	0	0	0	0	0	0	0	0	0	0	0	0	0	Avian Stratum 0	1443.04	0
20556	NFIB	0	0	0	0	0	0	0	0	0	0	0	0	0	0	0	0	0	0	0	0	0	0	0	0	0	0	0	0	0	0	0	0	0	0	0	0	0	0	0	0	0	0	0	0	0	Avian Stratum 0	1443.04	0
20557	ZDHHC21	0	0	0	0	0	0	0	0	0	0	0	0	0	0	0	0	0	0	0	0	0	0	0	0	0	0	0	0	0	0	0	0	0	0	0	0	0	0	0	0	0	0	0	0	0	Avian Stratum 0	1443.04	0
20558	CER1	0	0	0	0	0	0	0	0	0	0	0	0	0	0	0	0	0	0	0	0	0	0	0	0	0	0	0	0	0	0	0	0	0	0	0	0	0	0	0	0	0	0	0	0	0	Avian Stratum 0	1443.04	0
20559	FREM1	0	0	0	0	0	0	0	0	0	0	0	0	0	0	0	0	0	0	0	0	0	0	0	0	0	0	0	0	0	0	0	0	0	0	0	0	0	0	0	0	0	0	0	0	0	Avian Stratum 0	1443.04	0
20560	TTC39B	0	0	0	0	0	0	0	0	0	0	0	0	0	0	0	0	0	0	0	0	0	0	0	0	0	0	0	0	0	0	0	0	0	0	0	0	0	0	0	0	0	0	0	0	0	Avian Stratum 0	1443.04	0
20561	SNAPC3	0	0	0	0	0	0	0	0	0	0	0	0	0	0	0	0	0	0	0	0	0	0	0	0	0	0	0	0	0	0	0	0	0	0	0	0	0	0	0	0	0	0	0	0	0	Avian Stratum 0	1443.04	0
20562	PSIP1	0	0	0	0	0	0	0	0	0	0	0	0	0	0	0	0	0	0	0	0	0	0	0	0	0	0	0	0	0	0	0	0	0	0	0	0	0	0	0	0	0	0	0	0	0	Avian Stratum 0	1443.04	0
20563	CCDC171	0	0	0	0	0	0	0	0	0	0	0	0	0	0	0	0	0	0	0	0	0	0	0	0	0	0	0	0	0	0	0	0	0	0	0	0	0	0	0	0	0	0	0	0	0	Avian Stratum 0	1443.04	0
20564	BNC2	0	0	0	0	0	0	0	0	0	0	0	0	0	0	0	0	0	0	0	0	0	0	0	0	0	0	0	0	0	0	0	0	0	0	0	0	0	0	0	0	0	0	0	0	0	Avian Stratum 0	1443.04	0
20565	CNTLN	0	0	0	0	0	0	0	0	0	0	0	0	0	0	0	0	0	0	0	0	0	0	0	0	0	0	0	0	0	0	0	0	0	0	0	0	0	0	0	0	0	0	0	0	0	Avian Stratum 0	1443.04	0
20566	SH3GL2	0	0	0	0	0	0	0	0	0	0	0	0	0	0	0	0	0	0	0	0	0	0	0	0	0	0	0	0	0	0	0	0	0	0	0	0	0	0	0	0	0	0	0	0	0	Avian Stratum 0	1443.04	0
20567	ADAMTSL1	0	0	0	0	0	0	0	0	0	0	0	0	0	0	0	0	0	0	0	0	0	0	0	0	0	0	0	0	0	0	0	0	0	0	0	0	0	0	0	0	0	0	0	0	0	Avian Stratum 0	1443.04	0
20568	SAXO1	0	0	0	0	0	0	0	0	0	0	0	0	0	0	0	0	0	0	0	0	0	0	0	0	0	0	0	0	0	0	0	0	0	0	0	0	0	0	0	0	0	0	0	0	0	Avian Stratum 0	1443.04	0
20569	HAUS6	0	0	0	0	0	0	0	0	0	0	0	0	0	0	0	0	0	0	0	0	0	0	0	0	0	0	0	0	0	0	0	0	0	0	0	0	0	0	0	0	0	0	0	0	0	Avian Stratum 0	1443.04	0
20570	PLIN2	0	0	0	0	0	0	0	0	0	0	0	0	0	0	0	0	0	0	0	0	0	0	0	0	0	0	0	0	0	0	0	0	0	0	0	0	0	0	0	0	0	0	0	0	0	Avian Stratum 0	1443.04	0
20571	DENND4C	0	0	0	0	0	0	0	0	0	0	0	0	0	0	0	0	0	0	0	0	0	0	0	0	0	0	0	0	0	0	0	0	0	0	0	0	0	0	0	0	0	0	0	0	0	Avian Stratum 0	1443.04	0
20572	RPS6	0	0	0	0	0	0	0	0	0	0	0	0	0	0	0	0	0	0	0	0	0	0	0	0	0	0	0	0	0	0	0	0	0	0	0	0	0	0	0	0	0	0	0	0	0	Avian Stratum 0	1443.04	0
20573	ACER2	0	0	0	0	0	0	0	0	0	0	0	0	0	0	0	0	0	0	0	0	0	0	0	0	0	0	0	0	0	0	0	0	0	0	0	0	0	0	0	0	0	0	0	0	0	Avian Stratum 0	1443.04	0
20574	SLC24A2	0	0	0	0	0	0	0	0	0	0	0	0	0	0	0	0	0	0	0	0	0	0	0	0	0	0	0	0	0	0	0	0	0	0	0	0	0	0	0	0	0	0	0	0	0	Avian Stratum 0	1443.04	0
20575	MLLT3	0	0	0	0	0	0	0	0	0	0	0	0	0	0	0	0	0	0	0	0	0	0	0	0	0	0	0	0	0	0	0	0	0	0	0	0	0	0	0	0	0	0	0	0	0	Avian Stratum 0	1443.04	0
20576	FOCAD	0	0	0	0	0	0	0	0	0	0	0	0	0	0	0	0	0	0	0	0	0	0	0	0	0	0	0	0	0	0	0	0	0	0	0	0	0	0	0	0	0	0	0	0	0	Avian Stratum 0	1443.04	0
20577	HACD4	0	0	0	0	0	0	0	0	0	0	0	0	0	0	0	0	0	0	0	0	0	0	0	0	0	0	0	0	0	0	0	0	0	0	0	0	0	0	0	0	0	0	0	0	0	Avian Stratum 0	1443.04	0
20578	IFNE	0	0	0	0	0	0	0	0	0	0	0	0	0	0	0	0	0	0	0	0	0	0	0	0	0	0	0	0	0	0	0	0	0	0	0	0	0	0	0	0	0	0	0	0	0	Avian Stratum 0	1443.04	0
20579	MTAP	0	0	0	0	0	0	0	0	0	0	0	0	0	0	0	0	0	0	0	0	0	0	0	0	0	0	0	0	0	0	0	0	0	0	0	0	0	0	0	0	0	0	0	0	0	Avian Stratum 0	1443.04	0
20580	ELAVL2	0	0	0	0	0	0	0	0	0	0	0	0	0	0	0	0	0	0	0	0	0	0	0	0	0	0	0	0	0	0	0	0	0	0	0	0	0	0	0	0	0	0	0	0	0	Avian Stratum 0	1443.04	0
20581	CDKN2B	0	0	0	0	0	0	0	0	0	0	0	0	0	0	0	0	0	0	0	0	0	0	0	0	0	0	0	0	0	0	0	0	0	0	0	0	0	0	0	0	0	0	0	0	0	Avian Stratum 0	1443.04	0
20582	TUSC1	0	0	0	0	0	0	0	0	0	0	0	0	0	0	0	0	0	0	0	0	0	0	0	0	0	0	0	0	0	0	0	0	0	0	0	0	0	0	0	0	0	0	0	0	0	Avian Stratum 0	1443.04	0
20583	LOC113428225	0	0	0	0	0	0	0	0	0	0	0	0	0	0	0	0	0	0	0	0	0	0	0	0	0	0	0	0	0	0	0	0	0	0	0	0	0	0	0	0	0	0	0	0	0	Avian Stratum 0	1443.04	0
20584	CAAP1	0	0	0	0	0	0	0	0	0	0	0	0	0	0	0	0	0	0	0	0	0	0	0	0	0	0	0	0	0	0	0	0	0	0	0	0	0	0	0	0	0	0	0	0	0	Avian Stratum 0	1443.04	0
20585	PLAA	0	0	0	0	0	0	0	0	0	0	0	0	0	0	0	0	0	0	0	0	0	0	0	0	0	0	0	0	0	0	0	0	0	0	0	0	0	0	0	0	0	0	0	0	0	Avian Stratum 0	1443.04	0
20586	LRRC19	0	0	0	0	0	0	0	0	0	0	0	0	0	0	0	0	0	0	0	0	0	0	0	0	0	0	0	0	0	0	0	0	0	0	0	0	0	0	0	0	0	0	0	0	0	Avian Stratum 0	1443.04	0
20587	IFT74	0	0	0	0	0	0	0	0	0	0	0	0	0	0	0	0	0	0	0	0	0	0	0	0	0	0	0	0	0	0	0	0	0	0	0	0	0	0	0	0	0	0	0	0	0	Avian Stratum 0	1443.04	0
20588	TEK	0	0	0	0	0	0	0	0	0	0	0	0	0	0	0	0	0	0	0	0	0	0	0	0	0	0	0	0	0	0	0	0	0	0	0	0	0	0	0	0	0	0	0	0	0	Avian Stratum 0	1443.04	0
20589	MOB3B	0	0	0	0	0	0	0	0	0	0	0	0	0	0	0	0	0	0	0	0	0	0	0	0	0	0	0	0	0	0	0	0	0	0	0	0	0	0	0	0	0	0	0	0	0	Avian Stratum 0	1443.04	0
20590	C9orf72	0	0	0	0	0	0	0	0	0	0	0	0	0	0	0	0	0	0	0	0	0	0	0	0	0	0	0	0	0	0	0	0	0	0	0	0	0	0	0	0	0	0	0	0	0	Avian Stratum 0	1443.04	0
20591	LINGO2	0	0	0	0	0	0	0	0	0	0	0	0	0	0	0	0	0	0	0	0	0	0	0	0	0	0	0	0	0	0	0	0	0	0	0	0	0	0	0	0	0	0	0	0	0	Avian Stratum 0	1443.04	0
20592	LOC103280019	0	0	0	0	0	0	0	0	0	0	0	0	0	0	0	0	0	0	0	0	0	0	0	0	0	0	0	0	0	0	0	0	0	0	0	0	0	0	0	0	0	0	0	0	0	Avian Stratum 0	1443.04	0
20593	DDX58	0	0	0	0	0	0	0	0	0	0	0	0	0	0	0	0	0	0	0	0	0	0	0	0	0	0	0	0	0	0	0	0	0	0	0	0	0	0	0	0	0	0	0	0	0	Avian Stratum 0	1443.04	0
20594	ACO1	0	0	0	0	0	0	0	0	0	0	0	0	0	0	0	0	0	0	0	0	0	0	0	0	0	0	0	0	0	0	0	0	0	0	0	0	0	0	0	0	0	0	0	0	0	Avian Stratum 0	1443.04	0
20595	DGKQ	0	0	0	0	0	0	0	0	0	0	0	0	0	0	0	0	0	0	0	0	0	0	0	0	0	0	0	0	0	0	0	0	0	0	0	0	0	0	0	0	0	0	0	0	0	Avian Stratum 0	1443.04	0
20596	TDRD7	0	0	0	0	0	0	0	0	0	0	0	0	0	0	0	0	0	0	0	0	0	0	0	0	0	0	0	0	0	0	0	0	0	0	0	0	0	0	0	0	0	0	0	0	0	Avian Stratum 0	1443.04	0
20597	TMOD1	0	0	0	0	0	0	0	0	0	0	0	0	0	0	0	0	0	0	0	0	0	0	0	0	0	0	0	0	0	0	0	0	0	0	0	0	0	0	0	0	0	0	0	0	0	Avian Stratum 0	1443.04	0
20598	TSTD2	0	0	0	0	0	0	0	0	0	0	0	0	0	0	0	0	0	0	0	0	0	0	0	0	0	0	0	0	0	0	0	0	0	0	0	0	0	0	0	0	0	0	0	0	0	Avian Stratum 0	1443.04	0
20599	NCBP1	0	0	0	0	0	0	0	0	0	0	0	0	0	0	0	0	0	0	0	0	0	0	0	0	0	0	0	0	0	0	0	0	0	0	0	0	0	0	0	0	0	0	0	0	0	Avian Stratum 0	1443.04	0
20600	XPA	0	0	0	0	0	0	0	0	0	0	0	0	0	0	0	0	0	0	0	0	0	0	0	0	0	0	0	0	0	0	0	0	0	0	0	0	0	0	0	0	0	0	0	0	0	Avian Stratum 0	1443.04	0
20601	HEMGN	0	0	0	0	0	0	0	0	0	0	0	0	0	0	0	0	0	0	0	0	0	0	0	0	0	0	0	0	0	0	0	0	0	0	0	0	0	0	0	0	0	0	0	0	0	Avian Stratum 0	1443.04	0
20602	FOXE1	0	0	0	0	0	0	0	0	0	0	0	0	0	0	0	0	0	0	0	0	0	0	0	0	0	0	0	0	0	0	0	0	0	0	0	0	0	0	0	0	0	0	0	0	0	Avian Stratum 0	1443.04	0
20603	SPINK4	0	0	0	0	0	0	0	0	0	0	0	0	0	0	0	0	0	0	0	0	0	0	0	0	0	0	0	0	0	0	0	0	0	0	0	0	0	0	0	0	0	0	0	0	0	Avian Stratum 0	1443.04	0
20604	B4GALT1	0	0	0	0	0	0	0	0	0	0	0	0	0	0	0	0	0	0	0	0	0	0	0	0	0	0	0	0	0	0	0	0	0	0	0	0	0	0	0	0	0	0	0	0	0	Avian Stratum 0	1443.04	0
20605	SMU1	0	0	0	0	0	0	0	0	0	0	0	0	0	0	0	0	0	0	0	0	0	0	0	0	0	0	0	0	0	0	0	0	0	0	0	0	0	0	0	0	0	0	0	0	0	Avian Stratum 0	1443.04	0
20606	DNAJA1	0	0	0	0	0	0	0	0	0	0	0	0	0	0	0	0	0	0	0	0	0	0	0	0	0	0	0	0	0	0	0	0	0	0	0	0	0	0	0	0	0	0	0	0	0	Avian Stratum 0	1443.04	0
20607	APTX	0	0	0	0	0	0	0	0	0	0	0	0	0	0	0	0	0	0	0	0	0	0	0	0	0	0	0	0	0	0	0	0	0	0	0	0	0	0	0	0	0	0	0	0	0	Avian Stratum 0	1443.04	0
20608	ACTL7A	0	0	0	0	0	0	0	0	0	0	0	0	0	0	0	0	0	0	0	0	0	0	0	0	0	0	0	0	0	0	0	0	0	0	0	0	0	0	0	0	0	0	0	0	0	Avian Stratum 0	1443.04	0
20609	ELP1	0	0	0	0	0	0	0	0	0	0	0	0	0	0	0	0	0	0	0	0	0	0	0	0	0	0	0	0	0	0	0	0	0	0	0	0	0	0	0	0	0	0	0	0	0	Avian Stratum 0	1443.04	0
20610	TBC1D2	0	0	0	0	0	0	0	0	0	0	0	0	0	0	0	0	0	0	0	0	0	0	0	0	0	0	0	0	0	0	0	0	0	0	0	0	0	0	0	0	0	0	0	0	0	Avian Stratum 0	1443.04	0
20611	CORO2A	0	0	0	0	0	0	0	0	0	0	0	0	0	0	0	0	0	0	0	0	0	0	0	0	0	0	0	0	0	0	0	0	0	0	0	0	0	0	0	0	0	0	0	0	0	Avian Stratum 0	1443.04	0
20612	SHB	0	0	0	0	0	0	0	0	0	0	0	0	0	0	0	0	0	0	0	0	0	0	0	0	0	0	0	0	0	0	0	0	0	0	0	0	0	0	0	0	0	0	0	0	0	Avian Stratum 0	1443.04	0
20613	TOMM5	0	0	0	0	0	0	0	0	0	0	0	0	0	0	0	0	0	0	0	0	0	0	0	0	0	0	0	0	0	0	0	0	0	0	0	0	0	0	0	0	0	0	0	0	0	Avian Stratum 0	1443.04	0
20614	FRMPD1	0	0	0	0	0	0	0	0	0	0	0	0	0	0	0	0	0	0	0	0	0	0	0	0	0	0	0	0	0	0	0	0	0	0	0	0	0	0	0	0	0	0	0	0	0	Avian Stratum 0	1443.04	0
20615	TRMT10B	0	0	0	0	0	0	0	0	0	0	0	0	0	0	0	0	0	0	0	0	0	0	0	0	0	0	0	0	0	0	0	0	0	0	0	0	0	0	0	0	0	0	0	0	0	Avian Stratum 0	1443.04	0
20616	DCAF10	0	0	0	0	0	0	0	0	0	0	0	0	0	0	0	0	0	0	0	0	0	0	0	0	0	0	0	0	0	0	0	0	0	0	0	0	0	0	0	0	0	0	0	0	0	Avian Stratum 0	1443.04	0
20617	SLC25A51	0	0	0	0	0	0	0	0	0	0	0	0	0	0	0	0	0	0	0	0	43	43	1	0	0	0	38	6	0	13.7	3.34	3.34	6.46	7.2	7.2	2.6	3.9	26.3	4	38	1	2	13	13	276.04	Avian Stratum 0	1443.04	0.191291
20618	FBXO10	0	0	0	0	0	0	0	0	0	0	0	0	0	0	0	0	0	0	0	0	0	0	0	0	0	0	0	0	0	0	0	0	0	0	0	0	0	0	0	0	0	0	0	0	0	Avian Stratum 0	1443.04	0
20619	POLR1E	0	0	0	0	0	0	0	0	0	0	0	0	0	0	0	0	0	0	0	0	0	0	0	0	0	0	0	0	0	0	0	0	0	0	0	0	0	0	0	0	0	0	0	0	0	Avian Stratum 0	1443.04	0
20620	ZBTB5	0	0	0	0	0	0	0	0	0	0	0	0	0	0	0	0	0	0	0	82	0	0	0	0	0	0	0	0	0	0	0	0	0	0	0	0	0	0	0	0	1	2	13	13	111	Avian Stratum 0	1443.04	0.0769209
20621	GRHPR	0	0	0	0	0	0	0	0	0	0	0	0	0	0	0	0	0	0	0	0	0	0	0	0	0	0	0	0	0	0	0	0	0	0	0	0	0	0	0	0	0	0	0	0	0	Avian Stratum 0	1443.04	0
20622	ZCCHC7	0	0	0	0	0	0	0	0	0	0	0	0	0	0	0	0	0	0	0	0	0	0	0	0	0	0	0	0	0	0	0	0	0	0	0	0	0	0	0	0	0	0	0	0	0	Avian Stratum 0	1443.04	0
20623	PAX5	0	0	0	0	0	0	0	0	0	0	0	0	0	0	0	0	0	0	0	0	0	0	0	0	0	0	0	0	0	0	0	0	0	0	0	0	0	0	0	0	0	0	0	0	0	Avian Stratum 0	1443.04	0
20624	MELK	0	0	0	0	0	0	0	0	0	0	0	0	0	0	0	0	0	0	0	0	0	0	0	0	0	0	0	0	0	0	0	0	0	0	0	0	0	0	0	0	0	0	0	0	0	Avian Stratum 0	1443.04	0
20625	RNF38	0	0	0	0	0	0	0	0	0	0	0	0	0	0	0	0	0	0	0	0	0	43	1	0	0	0	0	0	0	13.7	0	0	0	7.2	7.2	2.6	3.9	26.3	4	38	1	2	13	13	175.9	Avian Stratum 0	1443.04	0.121895
20626	TRIM14	0	0	0	0	0	0	0	0	0	0	0	0	0	0	0	0	0	0	0	0	0	0	0	0	0	0	0	0	0	0	0	0	0	0	0	0	0	0	0	0	0	0	0	0	0	Avian Stratum 0	1443.04	0
20627	NANS	0	0	0	0	0	0	0	0	0	0	0	0	0	0	0	0	0	0	0	0	0	0	0	0	0	0	0	0	0	0	0	0	0	0	0	0	0	0	0	0	0	0	0	0	0	Avian Stratum 0	1443.04	0
20628	CLTA	0	0	0	0	0	0	0	0	0	0	0	0	0	0	0	0	0	0	0	0	0	0	0	0	0	0	0	0	0	0	0	0	0	0	0	0	0	0	0	0	0	0	0	0	0	Avian Stratum 0	1443.04	0
20629	GNE	0	0	0	0	0	0	0	0	0	0	0	0	0	0	0	0	0	0	0	0	0	0	0	0	0	0	0	0	0	0	0	0	0	0	0	0	0	0	0	0	0	0	0	0	0	Avian Stratum 0	1443.04	0
20630	CPLX1	0	0	0	0	0	0	0	0	0	0	0	0	0	0	0	0	0	0	0	0	0	0	0	0	0	0	0	0	0	0	0	0	0	0	0	0	0	0	0	0	0	0	0	0	0	Avian Stratum 0	1443.04	0
20631	PCGF3	90	0	3	0	18	0	0	0	0	0	0	0	0	0	0	0	0	0	0	0	0	0	0	0	0	0	0	0	40	0	0	0	0	7.2	7.2	2.6	3.9	26.3	4	38	1	2	13	13	269.2	Avian Stratum 0	1443.04	0.186551
20632	CHRNA8	0	0	0	0	0	0	0	0	0	0	0	0	0	0	0	0	0	0	0	0	0	0	0	0	0	0	0	0	0	0	0	0	0	0	0	0	0	0	0	0	0	0	0	0	0	Avian Stratum 0	1443.04	0
20633	KLF4	0	0	0	0	0	0	0	0	0	0	0	0	0	0	0	0	0	0	0	0	0	0	0	0	0	0	0	0	0	0	0	0	0	0	0	0	0	0	0	0	0	0	0	0	0	Avian Stratum 0	1443.04	0
20634	RAD23B	0	0	0	0	0	0	0	0	0	0	0	0	0	0	0	0	0	0	0	0	0	0	0	0	0	0	0	0	0	0	0	0	0	0	0	0	0	0	0	0	0	0	0	0	0	Avian Stratum 0	1443.04	0
20635	ZNF462	0	0	0	0	0	0	0	0	0	0	0	0	0	0	0	0	79	2	2	0	0	43	1	35	0	3	0	6	0	0	3.34	3.34	6.46	7.2	7.2	2.6	3.9	26.3	4	38	1	2	13	13	302.34	Avian Stratum 0	1443.04	0.209516
20636	TMEM38B	0	0	0	0	0	0	0	0	0	0	0	0	0	0	0	0	0	0	0	0	0	0	0	0	0	0	0	0	0	0	0	0	0	0	0	0	0	0	0	0	0	0	0	0	0	Avian Stratum 0	1443.04	0
20637	TAL2	0	0	0	0	0	0	0	0	0	0	0	0	0	0	0	0	0	0	0	0	0	0	0	0	0	0	0	0	0	0	0	0	0	0	0	0	0	0	0	0	0	0	0	0	0	Avian Stratum 0	1443.04	0
20638	FKTN	0	0	0	0	0	0	0	0	0	0	0	0	0	0	0	0	0	0	0	0	0	0	0	0	0	0	0	0	0	0	0	0	0	0	0	0	0	0	0	0	0	0	0	0	0	Avian Stratum 0	1443.04	0
20639	FSD1L	0	0	0	0	0	0	0	0	0	0	0	0	0	0	0	0	0	0	0	0	0	0	0	0	0	0	0	0	0	0	0	0	0	0	0	0	0	0	0	0	0	0	0	0	0	Avian Stratum 0	1443.04	0
20640	SLC44A1	0	0	0	0	0	0	0	0	0	0	0	0	0	0	0	0	0	0	0	0	0	0	0	0	0	0	0	0	0	0	0	0	0	0	0	0	0	0	0	0	0	0	0	0	0	Avian Stratum 0	1443.04	0
20641	ABCA1	0	0	0	0	0	0	0	0	0	0	0	0	0	0	0	0	0	0	0	0	0	0	0	0	0	0	0	0	0	0	0	0	0	0	0	0	0	0	0	0	0	0	0	0	0	Avian Stratum 0	1443.04	0
20642	NIPSNAP3A	0	0	0	0	0	0	0	0	0	0	0	0	0	0	0	0	0	0	0	0	0	0	0	0	0	0	0	0	0	0	0	0	0	0	0	0	0	0	0	0	0	0	0	0	0	Avian Stratum 0	1443.04	0
20643	PSD3	0	0	0	0	0	0	0	0	0	0	0	0	0	0	0	0	0	0	0	0	0	0	0	0	0	0	0	0	0	0	0	0	0	0	0	0	0	0	0	0	0	0	0	0	0	Avian Stratum 0	1443.04	0
20644	LPL	0	0	0	0	0	0	0	0	0	0	0	0	0	0	0	0	0	0	0	0	0	0	0	0	0	0	0	0	0	0	0	0	0	0	0	0	0	0	0	0	0	0	0	0	0	Avian Stratum 0	1443.04	0
20645	NRG1	0	0	0	0	0	0	0	0	0	0	0	0	0	0	0	0	0	0	0	0	0	0	0	0	0	0	0	0	0	0	0	0	0	0	0	0	0	0	0	0	0	0	0	0	0	Avian Stratum 0	1443.04	0
20646	FUT10	0	0	0	0	0	0	0	0	0	0	0	0	0	0	0	0	0	0	0	0	0	0	0	0	0	0	0	0	0	0	0	0	0	0	0	0	0	0	0	0	0	0	0	0	0	Avian Stratum 0	1443.04	0
20647	FNTA	0	0	0	0	0	0	0	0	0	0	0	0	0	0	0	0	0	0	0	0	0	0	0	0	0	0	0	0	0	0	0	0	0	0	0	0	0	0	0	0	0	0	0	0	0	Avian Stratum 0	1443.04	0
20648	KCMF1	0	0	0	0	0	77	0	37	40	21	0	0	0	0	0	0	0	0	0	0	43	43	1	35	35	3	38	6	40	13.7	3.34	3.34	6.46	7.2	7.2	2.6	3.9	26.3	4	38	1	2	13	13	564.04	Avian Stratum 0	1443.04	0.390869
20649	HOOK3	0	0	0	0	0	0	0	0	0	0	0	0	0	0	0	0	0	0	0	0	0	0	0	0	0	0	0	0	0	0	0	0	0	0	0	0	0	0	0	0	0	0	0	0	0	Avian Stratum 0	1443.04	0
20650	RNF170	0	0	0	0	0	0	0	0	0	0	0	0	0	0	0	0	0	0	0	0	0	0	0	0	0	0	0	0	0	0	0	0	0	0	0	0	0	0	0	0	0	0	0	0	0	Avian Stratum 0	1443.04	0
20651	THAP1	0	0	0	0	0	0	0	0	0	0	0	0	0	0	0	0	0	0	0	0	0	0	0	0	0	0	0	0	0	0	0	0	0	0	0	0	0	0	0	0	0	0	0	0	0	Avian Stratum 0	1443.04	0
20652	CHRNB3	0	0	0	0	0	0	0	0	0	0	0	0	0	0	0	0	0	0	0	0	0	0	0	0	0	0	0	0	0	0	0	0	0	0	0	0	0	0	0	0	0	0	0	0	0	Avian Stratum 0	1443.04	0
20653	CHRNA6	0	0	0	0	0	0	0	0	0	0	0	0	0	0	0	0	0	0	0	0	0	0	0	0	0	0	0	0	0	0	0	0	0	0	0	0	0	0	0	0	0	0	0	0	0	Avian Stratum 0	1443.04	0
20654	IDUA	0	0	0	0	0	0	0	0	0	0	0	0	0	0	0	0	0	0	0	0	0	0	0	0	0	0	0	0	0	0	0	0	0	0	0	0	0	0	0	0	0	0	0	0	0	Avian Stratum 0	1443.04	0
20655	SLC26A1	0	0	0	0	0	0	0	0	0	0	0	0	0	0	0	0	0	0	0	0	0	0	0	0	0	0	0	0	0	0	0	0	0	0	0	0	0	0	0	0	0	0	0	0	0	Avian Stratum 0	1443.04	0
20656	RBP4	0	90	3	0	18	0	0	0	0	0	0	0	0	0	0	0	0	0	0	0	0	0	0	0	0	0	0	0	0	0	0	0	0	0	0	0	0	0	0	0	0	0	0	0	111	Avian Stratum 0	1443.04	0.0769209
20657	PDE6B	0	0	0	0	0	0	0	0	0	0	0	0	0	0	0	0	0	0	0	0	0	0	0	0	0	0	0	0	0	0	0	0	0	0	0	0	0	0	0	0	0	0	0	0	0	Avian Stratum 0	1443.04	0
20658	ATP5ME	0	0	0	0	0	0	0	0	0	0	0	0	0	0	0	0	0	0	0	0	0	0	0	0	0	0	0	0	0	0	0	0	0	0	0	0	0	0	0	0	0	0	0	0	0	Avian Stratum 0	1443.04	0
20659	TMEM175	0	0	0	0	0	0	0	0	0	0	0	0	0	0	0	0	0	0	0	0	0	0	0	0	0	0	0	0	0	0	0	0	0	0	0	0	0	0	0	0	0	0	0	0	0	Avian Stratum 0	1443.04	0
20660	GAK	0	0	0	0	0	0	0	0	0	0	0	0	0	0	0	0	0	0	0	0	0	0	0	0	0	0	0	0	0	0	0	0	0	0	0	0	0	0	0	0	0	0	0	0	0	Avian Stratum 0	1443.04	0
20661	PIGG	0	0	0	0	0	0	0	0	0	0	0	0	0	0	0	0	0	0	0	0	0	0	0	0	0	0	0	0	0	0	0	0	0	0	0	0	0	0	0	0	0	0	0	0	0	Avian Stratum 0	1443.04	0
20662	TRABD2A	0	0	0	0	0	0	0	0	0	0	0	0	0	0	0	0	0	0	0	0	0	0	0	0	0	0	0	0	0	0	0	0	0	0	0	0	0	0	0	0	0	0	0	0	0	Avian Stratum 0	1443.04	0
20663	SLC49A3	0	0	0	0	0	0	0	0	0	0	0	0	0	0	0	0	0	0	0	0	0	0	0	0	0	0	0	0	0	0	0	0	0	0	0	0	0	0	0	0	0	0	0	0	0	Avian Stratum 0	1443.04	0
20664	GRIN3A	0	0	0	0	0	0	0	0	0	0	0	0	0	0	0	0	0	0	0	0	0	0	0	0	0	0	0	0	0	0	0	0	0	0	0	0	0	0	0	0	0	0	0	0	0	Avian Stratum 0	1443.04	0
20665	RNF20	0	0	0	0	0	0	0	0	0	0	0	0	0	0	0	0	0	0	0	0	0	0	0	0	0	0	0	0	0	0	0	0	0	0	0	0	0	0	0	0	0	0	0	0	0	Avian Stratum 0	1443.04	0
20666	PGAP4	0	0	0	0	0	0	0	0	0	0	0	0	0	0	0	0	0	0	0	0	0	0	0	0	0	0	0	0	0	0	0	0	0	0	0	0	0	0	0	0	0	0	0	0	0	Avian Stratum 0	1443.04	0
20667	ALDOB	0	0	0	0	0	0	0	0	0	0	0	0	0	0	0	0	0	0	0	0	0	0	0	0	0	0	0	0	0	0	0	0	0	0	0	0	0	0	0	0	0	0	0	0	0	Avian Stratum 0	1443.04	0
20668	MRPL50	0	0	0	0	0	0	0	0	0	0	0	0	0	0	0	0	0	0	0	0	0	0	0	0	0	0	0	0	0	0	0	0	0	0	0	0	0	0	0	0	0	0	0	0	0	Avian Stratum 0	1443.04	0
20669	PLPPR1	0	0	0	0	0	0	0	0	0	0	0	0	0	0	0	0	0	0	0	0	0	0	0	0	0	0	0	0	0	0	0	0	0	0	0	0	0	0	0	0	0	0	0	0	0	Avian Stratum 0	1443.04	0
20670	PALM2	0	90	3	0	18	0	0	0	0	0	0	0	0	0	0	0	0	0	0	0	0	0	0	0	0	0	0	0	0	0	0	0	0	0	0	0	0	0	0	0	0	0	0	0	111	Avian Stratum 0	1443.04	0.0769209
20671	AKAP2	0	0	0	0	0	0	0	0	0	0	0	0	0	0	0	0	0	0	0	0	0	0	0	0	0	0	0	0	0	0	0	0	0	0	0	0	0	0	0	0	0	0	0	0	0	Avian Stratum 0	1443.04	0
20672	SLC46A2	0	0	0	0	0	0	0	0	0	0	0	0	0	0	0	0	0	0	0	0	0	0	0	0	0	0	0	0	0	0	0	0	0	0	0	0	0	0	0	0	0	0	0	0	0	Avian Stratum 0	1443.04	0
20673	SNX30	0	0	0	0	0	0	0	0	0	0	0	0	0	0	0	0	0	0	0	0	0	0	0	0	0	0	0	0	0	0	0	0	0	0	0	0	0	0	0	0	0	0	0	0	0	Avian Stratum 0	1443.04	0
20674	INIP	0	0	0	0	0	0	0	0	0	0	0	0	0	0	0	0	0	0	0	0	0	0	0	0	0	0	0	0	0	0	0	0	0	0	0	0	0	0	0	0	0	0	0	0	0	Avian Stratum 0	1443.04	0
20675	KIAA1958	0	0	0	0	0	0	0	0	0	0	0	0	0	0	0	0	0	0	0	0	0	0	0	0	0	0	0	0	0	0	0	0	0	0	0	0	0	0	0	0	0	0	0	0	0	Avian Stratum 0	1443.04	0
20676	HSDL2	0	0	0	0	0	0	0	0	0	0	0	0	0	0	0	0	0	0	0	0	0	0	0	0	0	0	0	0	0	0	0	0	0	0	0	0	0	0	0	0	0	0	0	0	0	Avian Stratum 0	1443.04	0
20677	PTBP3	0	0	0	0	0	0	0	0	0	0	0	0	0	0	0	0	0	0	0	0	0	0	0	0	0	0	0	0	0	0	0	0	0	0	0	0	0	0	0	0	0	0	0	0	0	Avian Stratum 0	1443.04	0
20678	SUSD1	0	0	0	0	0	0	0	0	0	0	0	0	0	0	0	0	0	0	0	0	0	0	0	0	0	0	0	0	0	0	0	0	0	0	0	0	0	0	0	0	0	0	0	0	0	Avian Stratum 0	1443.04	0
20679	UGCG	0	0	0	0	0	0	0	0	0	0	0	0	0	0	0	0	0	0	0	0	0	0	0	0	0	0	0	0	0	0	0	0	0	0	0	0	0	0	0	0	0	0	0	0	0	Avian Stratum 0	1443.04	0
20680	SHOC1	0	0	0	0	0	0	0	0	0	0	0	0	0	0	0	0	0	0	0	0	0	0	0	0	0	0	0	0	0	0	0	0	0	0	0	0	0	0	0	0	0	0	0	0	0	Avian Stratum 0	1443.04	0
20681	GNG10	0	0	0	0	0	0	0	0	0	0	0	0	0	0	0	0	0	0	0	0	0	0	0	0	0	0	0	0	0	0	0	0	0	0	0	0	0	0	0	0	0	0	0	0	0	Avian Stratum 0	1443.04	0
20682	DNAJC25	0	0	0	0	0	0	0	0	0	0	0	0	0	0	0	0	0	0	0	0	0	0	0	0	0	0	0	0	0	0	0	0	0	0	0	0	0	0	0	0	0	0	0	0	0	Avian Stratum 0	1443.04	0
20683	ECPAS	0	0	0	0	0	0	0	0	0	0	0	0	0	0	0	0	0	0	0	0	0	0	0	0	0	0	0	0	0	0	0	0	0	0	0	0	0	0	0	0	0	0	0	0	0	Avian Stratum 0	1443.04	0
20684	SMC2	0	0	0	0	0	0	0	0	0	0	0	0	0	0	0	0	0	0	0	0	0	0	0	0	0	0	0	0	0	0	0	0	0	0	0	0	0	0	0	0	0	0	0	0	0	Avian Stratum 0	1443.04	0
20685	PTGR1	0	0	0	0	0	0	0	0	0	0	0	0	0	0	0	0	0	0	0	0	0	0	0	0	0	0	0	0	0	0	0	0	0	0	0	0	0	0	0	0	0	0	0	0	0	Avian Stratum 0	1443.04	0
20686	TXNDC2	0	0	0	0	0	0	0	0	0	0	0	0	0	0	0	0	0	0	0	0	0	0	0	0	0	0	0	0	0	0	0	0	0	0	0	0	0	0	0	0	0	0	0	0	0	Avian Stratum 0	1443.04	0
20687	SVEP1	0	0	0	0	0	0	0	0	0	0	0	0	0	0	0	0	0	0	0	0	0	0	0	0	0	0	0	0	0	0	0	0	0	0	0	0	0	0	0	0	0	0	0	0	0	Avian Stratum 0	1443.04	0
20688	MUSK	0	0	0	0	0	0	0	0	0	0	0	0	0	0	0	0	0	0	0	0	0	0	0	0	0	0	0	0	0	0	0	0	0	0	0	0	0	0	0	0	0	0	0	0	0	Avian Stratum 0	1443.04	0
20689	LPAR1	0	0	0	0	0	0	0	0	0	0	0	0	0	0	0	0	0	0	0	0	0	0	0	0	0	0	0	0	0	0	0	0	0	0	0	0	0	0	0	0	0	0	0	0	0	Avian Stratum 0	1443.04	0
20690	TMEM215	0	0	0	0	0	0	0	0	0	0	0	0	0	0	0	0	0	0	0	0	0	0	0	0	0	0	0	0	0	0	0	0	0	0	0	0	0	0	0	0	0	0	0	0	0	Avian Stratum 0	1443.04	0
20691	TOPORS	0	0	0	0	0	0	0	0	0	0	0	0	0	0	0	0	0	0	0	0	0	0	0	0	0	0	0	0	0	0	0	0	0	0	0	0	0	0	0	0	0	0	0	0	0	Avian Stratum 0	1443.04	0
