# Supplementary material for: Dosage-sensitive functions in embryonic development drove the survival of genes on sex-specific chromosomes in snakes, birds, and mammals
Source: HighWire-hosted journal article supplement (doi:10.1101/gr.268516.120), 2021-01-21
Supplement: Supplemental_Table_S23.xlsx [file Supplemental_Table_S23.xlsx]

## Sheet: Sheet1
Supplemental Table S23. Branch length and survival fraction calculations from therian species.
		Homo sapiens to Homo-Pan ancestor	Pan troglodytes to Homo-Pan ancestor	Homo-Pan ancestor to Homo-Gorilla ancestor	Gorilla gorilla to Homo-Gorilla ancestor	Homo-Gorilla ancestor to Homo-Macaca ancestor	Macaca mulatta to Homo-Macaca ancestor	Homo-Macaca ancestor to Homo-Callithrix ancestor	Callithrix jacchus to Homo-Callithrix ancestor	Homo-Callithrix ancestor to Homo-Mus ancestor	Mus musculus to Mus-Rattus ancestor	Rattus norvegicus to Mus-Rattus ancestor	Mus-Rattus ancestor to Homo-Mus ancestor	Homo-Mus ancestor to Homo-Bos ancestor	Canis lupus familiaris to Canis-Felis ancestor	Felis domestica to Canis-Felis ancestor	Canis-Felis ancestor to Canis-Equus ancestor	Equus ferus caballus to Canis-Equus ancestor	Canis-Equus ancestor to Canis-Bos ancestor	Bos taurus to Bos-Sus ancestor	Sus scrofa to Bos-Sus ancestor	Bos-Sus ancestor to Canis-Bos ancestor	Canis-Bos ancestor to Homo-Bos ancestor	Homo-Bos ancestor to Homo-Monodelphis ancestor	Monodelphis domestica to Monodelphis-Macropus ancestor	Macropus eugenii to Monodelphis-Macropus ancestor	Monodelphis-Macropus ancestor to Homo-Monodelphis ancestor
	Divergence (MY)	6.7	6.7	1.9	8.6	20.84	29.44	13.76	43.2	46.8	20.9	20.9	69.1	6	55	55	22	77	1	62	62	16	18	63	82	82	77
Strata	Branch Length	Homo sapiens to Homo-Pan ancestor	Pan troglodytes to Homo-Pan ancestor	Homo-Pan ancestor to Homo-Gorilla ancestor	Gorilla gorilla to Homo-Gorilla ancestor	Homo-Gorilla ancestor to Homo-Macaca ancestor	Macaca mulatta to Homo-Macaca ancestor	Homo-Macaca ancestor to Homo-Callithrix ancestor	Callithrix jacchus to Homo-Callithrix ancestor	Homo-Callithrix ancestor to Homo-Mus ancestor	Mus musculus to Mus-Rattus ancestor	Rattus norvegicus to Mus-Rattus ancestor	Mus-Rattus ancestor to Homo-Mus ancestor	Homo-Mus ancestor to Homo-Bos ancestor	Canis lupus familiaris to Canis-Felis ancestor	Felis domestica to Canis-Felis ancestor	Canis-Felis ancestor to Canis-Equus ancestor	Equus ferus caballus to Canis-Equus ancestor	Canis-Equus ancestor to Canis-Bos ancestor	Bos taurus to Bos-Sus ancestor	Sus scrofa to Bos-Sus ancestor	Bos-Sus ancestor to Canis-Bos ancestor	Canis-Bos ancestor to Homo-Bos ancestor	Homo-Bos ancestor to Homo-Monodelphis ancestor	Monodelphis domestica to Monodelphis-Macropus ancestor	Macropus eugenii to Monodelphis-Macropus ancestor	Monodelphis-Macropus ancestor to Homo-Monodelphis ancestor
Therian S1	966.84	6.7	6.7	1.9	8.6	20.84	29.44	13.76	43.2	46.8	20.9	20.9	69.1	6	55	55	22	77	1	62	62	16	18	63	82	82	77
Eutherian S2/S3	662.84	6.7	6.7	1.9	8.6	20.84	29.44	13.76	43.2	46.8	20.9	20.9	69.1	6	55	55	22	77	1	62	62	16	18	0	0	0	0
Metatherian S2	164	0	0	0	0	0	0	0	0	0	0	0	0	0	0	0	0	0	0	0	0	0	0	0	82	82	0
Simian S4	131.14	6.7	6.7	1.9	8.6	20.84	29.44	13.76	43.2	0	0	0	0	0	0	0	0	0	0	0	0	0	0	0	0	0	0
Carnivore S4	110	0	0	0	0	0	0	0	0	0	0	0	0	0	55	55	0	0	0	0	0	0	0	0	0	0	0
Pig S4	62	0	0	0	0	0	0	0	0	0	0	0	0	0	0	0	0	0	0	0	62	0	0	0	0	0	0
Bovid S4	24.6	0	0	0	0	0	0	0	0	0	0	0	0	0	0	0	0	0	0	24.6	0	0	0	0	0	0	0
Horse S4	9.2	0	0	0	0	0	0	0	0	0	0	0	0	0	0	0	0	9.2	0	0	0	0	0	0	0	0	0
Catarrhine S5	74.18	6.7	6.7	1.9	8.6	20.84	29.44	0	0	0	0	0	0	0	0	0	0	0	0	0	0	0	0	0	0	0	0
Marmoset S5	13	0	0	0	0	0	0	0	13	0	0	0	0	0	0	0	0	0	0	0	0	0	0	0	0	0	0
Catarrhine OFD1 X transposed region	74.18	6.7	6.7	1.9	8.6	20.84	29.44	0	0	0	0	0	0	0	0	0	0	0	0	0	0	0	0	0	0	0	0
Pig OFD1 X transposed region	62	0	0	0	0	0	0	0	0	0	0	0	0	0	0	0	0	0	0	0	62	0	0	0	0	0	0
Horse OFD1 X transposed region	7.7	0	0	0	0	0	0	0	0	0	0	0	0	0	0	0	0	7.7	0	0	0	0	0	0	0	0	0
Dog OFD1 X transposed region	46	0	0	0	0	0	0	0	0	0	0	0	0	0	46	0	0	0	0	0	0	0	0	0	0	0	0
Marmoset THOC2 X-transposed region	43.2	0	0	0	0	0	0	0	43.2	0	0	0	0	0	0	0	0	0	0	0	0	0	0	0	0	0	0
Rat MED14 X transposed region	20.9	0	0	0	0	0	0	0	0	0	0	20.9	0	0	0	0	0	0	0	0	0	0	0	0	0	0	0
Human PCDH11X X-transposed region	6.7	6.7	0	0	0	0	0	0	0	0	0	0	0	0	0	0	0	0	0	0	0	0	0	0	0	0	0
Number	Genes	Homo sapiens to Homo-Pan ancestor	Pan troglodytes to Homo-Pan ancestor	Homo-Pan ancestor to Homo-Gorilla ancestor	Gorilla gorilla to Homo-Gorilla ancestor	Homo-Gorilla ancestor to Homo-Macaca ancestor	Macaca mulatta to Homo-Macaca ancestor	Homo-Macaca ancestor to Homo-Callithrix ancestor	Callithrix jacchus to Homo-Callithrix ancestor	Homo-Callithrix ancestor to Homo-Mus ancestor	Mus musculus to Mus-Rattus ancestor	Rattus norvegicus to Mus-Rattus ancestor	Mus-Rattus ancestor to Homo-Mus ancestor	Homo-Mus ancestor to Homo-Bos ancestor	Canis lupus familiaris to Canis-Felis ancestor	Felis domestica to Canis-Felis ancestor	Canis-Felis ancestor to Canis-Equus ancestor	Equus ferus caballus to Canis-Equus ancestor	Canis-Equus ancestor to Canis-Bos ancestor	Bos taurus to Bos-Sus ancestor	Sus scrofa to Bos-Sus ancestor	Bos-Sus ancestor to Canis-Bos ancestor	Canis-Bos ancestor to Homo-Bos ancestor	Homo-Bos ancestor to Homo-Monodelphis ancestor	Monodelphis domestica to Monodelphis-Macropus ancestor	Macropus eugenii to Monodelphis-Macropus ancestor	Monodelphis-Macropus ancestor to Homo-Monodelphis ancestor	Branch Length	Strata	Max Branch Length	Survival Fraction
10001	PLCXD1	0	0	0	0	0	0	0	0	0	0	0	0	0	0	0	0	0	0	0	0	0	0	0	0	0	0	0	Marmoset S5	13	0
10002	GTPBP6	0	0	0	0	0	0	0	0	0	0	0	0	0	0	0	0	0	0	0	0	0	0	0	0	0	0	0	Marmoset S5	13	0
10003	PPP2R3B	0	0	0	0	0	0	0	0	0	0	0	0	0	0	0	0	0	0	0	0	0	0	0	0	0	0	0	Marmoset S5	13	0
10004	SHOX	0	0	0	0	0	0	0	0	0	0	0	0	0	0	0	0	0	0	0	0	0	0	0	0	0	0	0	Marmoset S5	13	0
10005	CRLF2	0	0	0	0	0	0	0	0	0	0	0	0	0	0	0	0	0	0	0	0	0	0	0	0	0	0	0	Marmoset S5	13	0
10006	CSF2RA	0	0	0	0	0	0	0	0	0	0	0	0	0	0	0	0	0	0	0	0	0	0	0	0	0	0	0	Marmoset S5	13	0
10007	IL3RA	0	0	0	0	0	0	0	0	0	0	0	0	0	0	0	0	0	0	0	0	0	0	0	0	0	0	0	Marmoset S5	13	0
10008	SLC25A6	0	0	0	0	0	0	0	0	0	0	0	0	0	0	0	0	0	0	0	0	0	0	0	0	0	0	0	Marmoset S5	13	0
10009	ASMTL	0	0	0	0	0	0	0	0	0	0	0	0	0	0	0	0	0	0	0	0	0	0	0	0	0	0	0	Marmoset S5	13	0
10010	P2RY8	0	0	0	0	0	0	0	13	0	0	0	0	0	0	0	0	0	0	0	0	0	0	0	0	0	0	13	Marmoset S5	13	1
10011	AKAP17A	0	0	0	0	0	0	0	13	0	0	0	0	0	0	0	0	0	0	0	0	0	0	0	0	0	0	13	Marmoset S5	13	1
10012	ASMT	0	0	0	0	0	0	0	0	0	0	0	0	0	0	0	0	0	0	0	0	0	0	0	0	0	0	0	Marmoset S5	13	0
10013	DHRSX	0	0	0	0	0	0	0	0	0	0	0	0	0	0	0	0	0	0	0	0	0	0	0	0	0	0	0	Marmoset S5	13	0
10014	ZBED1	0	0	0	0	0	0	0	13	0	0	0	0	0	0	0	0	0	0	0	0	0	0	0	0	0	0	13	Marmoset S5	13	1
10015	CD99	0	0	0	0	0	0	0	0	0	0	0	0	0	0	0	0	0	0	0	0	0	0	0	0	0	0	0	Marmoset S5	13	0
10016	XG	0	0	0	0	0	0	0	0	0	0	0	0	0	0	0	0	0	0	0	0	0	0	0	0	0	0	0	Catarrhine S5 & Marmoset S5	87.18	0
10017	GYG2	0	0	0	0	0	0	0	0	0	0	0	0	0	0	0	0	0	0	0	0	0	0	0	0	0	0	0	Catarrhine S5 & Marmoset S5	87.18	0
10018	ARSD	0	0	0	0	0	0	0	0	0	0	0	0	0	0	0	0	0	0	0	0	0	0	0	0	0	0	0	Catarrhine S5 & Marmoset S5	87.18	0
10019	ARSL	0	0	0	0	0	0	0	0	0	0	0	0	0	0	0	0	0	0	0	0	0	0	0	0	0	0	0	Catarrhine S5 & Marmoset S5	87.18	0
10020	ARSH	0	0	0	0	0	0	0	0	0	0	0	0	0	0	0	0	0	0	0	0	0	0	0	0	0	0	0	Catarrhine S5 & Marmoset S5	87.18	0
10021	ARSF	0	0	0	0	0	0	0	0	0	0	0	0	0	0	0	0	0	0	0	0	0	0	0	0	0	0	0	Catarrhine S5 & Marmoset S5	87.18	0
10022	MXRA5	0	0	0	0	0	29.44	0	0	0	0	0	0	0	0	0	0	0	0	0	0	0	0	0	0	0	0	29.44	Catarrhine S5 & Marmoset S5	87.18	0.337692
10023	PRKX	6.7	6.7	1.9	8.6	20.84	29.44	0	0	0	0	0	0	0	0	0	0	0	0	0	0	0	0	0	0	0	0	74.18	Catarrhine S5 & Marmoset S5	87.18	0.850883
10024	NLGN4X	6.7	6.7	1.9	8.6	20.84	29.44	13.76	43.2	0	0	0	0	0	0	0	0	9.2	0	0	0	0	0	0	0	0	0	140.34	Simian S4 & Horse S4	140.34	1
10025	PUDP	0	0	0	0	0	0	0	0	0	0	0	0	0	0	0	0	0	0	0	0	0	0	0	0	0	0	0	Simian S4 & Horse S4	140.34	0
10026	STS	0	0	0	0	0	0	0	0	0	0	0	0	0	0	0	0	9.2	0	0	0	0	0	0	0	0	0	9.2	Simian S4 & Horse S4	140.34	0.0655551
10027	PNPLA4	0	0	0	0	0	0	0	0	0	0	0	0	0	0	0	0	0	0	0	0	0	0	0	0	0	0	0	Simian S4 & Horse S4	140.34	0
10028	ANOS1	0	0	0	0	0	0	0	0	0	0	0	0	0	0	0	0	9.2	0	0	0	0	0	0	0	0	0	9.2	Simian S4 & Horse S4	140.34	0.0655551
10029	FAM9A	0	0	0	0	0	0	0	0	0	0	0	0	0	0	0	0	0	0	0	0	0	0	0	0	0	0	0	Simian S4 & Horse S4	140.34	0
10030	TBL1X	6.7	0	1.9	8.6	20.84	29.44	13.76	0	0	0	0	0	0	0	0	0	9.2	0	0	0	0	0	0	0	0	0	90.44	Simian S4 & Horse S4	140.34	0.644435
10031	GPR143	0	0	0	0	0	0	0	0	0	0	0	0	0	0	0	0	0	0	0	0	0	0	0	0	0	0	0	Simian S4 & Horse S4	662.84	0
10032	SHROOM2	0	0	0	0	0	0	0	0	0	0	0	0	0	0	0	0	9.2	0	0	0	0	0	0	0	0	0	9.2	Simian S4 & Horse S4 & Bovid S4	164.94	0.0557779
10033	CLDN34	0	0	0	0	0	0	0	0	0	0	0	0	0	0	0	0	0	0	0	0	0	0	0	0	0	0	0	Simian S4 & Horse S4 & Bovid S4	164.94	0
10034	Cldn34b2	0	0	0	0	0	0	0	0	0	0	0	0	0	0	0	0	0	0	0	0	0	0	0	0	0	0	0	Simian S4 & Horse S4 & Bovid S4	164.94	0
10035	Samt4	0	0	0	0	0	0	0	0	0	0	0	0	0	55	55	0	0	0	0	0	0	0	0	0	0	0	110	Simian S4 & Carnivore S4 & Bovid S4 & Horse S4	274.94	0.400087
10036	WWC3	0	0	0	0	0	0	0	0	0	0	0	0	0	0	0	0	9.2	0	0	0	0	0	0	0	0	0	9.2	Simian S4 & Carnivore S4 & Pig S4 & Bovid S4 & Horse S4	336.94	0.0273046
10037	CLCN4	0	0	0	0	0	0	0	0	0	0	0	0	0	0	0	0	0	0	0	0	0	0	0	0	0	0	0	Simian S4 & Carnivore S4 & Pig S4 & Bovid S4 & Horse S4	336.94	0
10038	MID1	0	0	0	0	0	0	0	0	0	0	0	0	0	0	0	0	0	0	0	0	0	0	0	0	0	0	0	Simian S4 & Carnivore S4 & Pig S4 & Bovid S4 & Horse S4	336.94	0
10039	HCCS	0	0	0	0	0	0	0	0	0	0	0	0	0	0	0	0	0	0	0	0	0	0	0	0	0	0	0	Eutherian S2/S3	662.84	0
10040	ARHGAP6	0	0	0	0	0	0	0	0	0	0	0	0	0	0	0	0	0	0	0	0	0	0	0	0	0	0	0	Eutherian S2/S3	662.84	0
10041	AMELX	6.7	6.7	1.9	8.6	20.84	29.44	13.76	0	46.8	0	0	0	6	0	55	22	77	1	62	62	16	18	0	0	0	0	453.74	Eutherian S2/S3	662.84	0.684539
10042	MSL3	0	0	0	0	0	0	0	0	0	0	0	0	0	0	0	0	0	0	0	0	0	0	0	0	0	0	0	Eutherian S2/S3	662.84	0
10043	FRMPD4	0	0	0	0	0	0	0	0	0	0	0	0	0	0	0	0	0	0	0	0	0	0	0	0	0	0	0	Eutherian S2/S3	662.84	0
10044	PRPS2	0	0	0	0	0	0	0	0	0	0	0	0	0	0	0	0	0	0	0	0	0	0	0	0	0	0	0	Eutherian S2/S3	662.84	0
10045	TLR7	0	0	0	0	0	0	0	0	0	0	0	0	0	0	0	0	0	0	0	0	0	0	0	0	0	0	0	Eutherian S2/S3	662.84	0
10046	TLR8	0	0	0	0	0	0	0	0	0	0	0	0	0	0	0	0	0	0	0	0	0	0	0	0	0	0	0	Eutherian S2/S3	662.84	0
10047	TMSB4X	6.7	0	1.9	8.6	20.84	29.44	13.76	0	46.8	0	0	0	6	0	0	0	77	1	0	62	16	18	0	0	0	0	308.04	Eutherian S2/S3	662.84	0.464728
10048	EGFL6	0	0	0	0	0	0	0	0	0	0	0	0	0	0	0	0	0	0	0	0	0	0	0	0	0	0	0	Eutherian S2/S3	662.84	0
10049	TCEANC	0	0	0	0	0	0	0	0	0	0	0	0	0	0	0	0	0	0	0	0	0	0	0	0	0	0	0	Eutherian S2/S3	662.84	0
10050	RAB9A	0	0	0	0	0	0	0	0	0	0	0	0	0	0	0	0	0	0	0	0	0	0	0	0	0	0	0	Eutherian S2/S3 & Catarrhine OFD1 X transposed region	737.02	0
10051	TRAPPC2	0	0	0	0	0	0	0	0	0	0	0	0	0	0	0	0	0	0	0	0	0	0	0	0	0	0	0	Eutherian S2/S3 & Catarrhine OFD1 X transposed region & Pig OFD1 X transposed region & Dog OFD1 X transposed region	845.02	0
10052	OFD1	0	0	0	0	0	0	0	0	0	0	0	0	0	0	46	0	7.7	0	62	62	16	18	0	0	0	0	211.7	Eutherian S2/S3 & Catarrhine OFD1 X transposed region & Pig OFD1 X transposed region & Horse OFD1 X transposed region & Dog OFD1 X transposed region	852.72	0.248264
10053	GPM6B	0	0	0	0	0	0	0	0	0	0	0	0	0	0	0	0	0	0	0	0	0	0	0	0	0	0	0	Eutherian S2/S3 & Catarrhine OFD1 X transposed region & Pig OFD1 X transposed region & Dog OFD1 X transposed region	845.02	0
10054	GEMIN8	0	0	0	0	0	0	0	0	0	0	0	0	0	0	0	0	0	0	0	0	0	0	0	0	0	0	0	Eutherian S2/S3	662.84	0
10055	GLRA2	0	0	0	0	0	0	0	0	0	0	0	0	0	0	0	0	0	0	0	0	0	0	0	0	0	0	0	Eutherian S2/S3	662.84	0
10056	FANCB	0	0	0	0	0	0	0	0	0	0	0	0	0	0	0	0	0	0	0	0	0	0	0	0	0	0	0	Eutherian S2/S3	662.84	0
10057	MOSPD2	0	0	0	0	0	0	0	0	0	0	0	0	0	0	0	0	0	0	0	0	0	0	0	0	0	0	0	Eutherian S2/S3	662.84	0
10058	ASB9	0	0	0	0	0	0	0	0	0	0	0	0	0	0	0	0	0	0	0	0	0	0	0	0	0	0	0	Eutherian S2/S3	662.84	0
10059	ASB11	0	0	0	0	0	0	0	0	0	0	0	0	0	0	0	0	0	0	0	0	0	0	0	0	0	0	0	Eutherian S2/S3	662.84	0
10060	PIGA	0	0	0	0	0	0	0	0	0	0	0	0	0	0	0	0	0	0	0	0	0	0	0	0	0	0	0	Eutherian S2/S3	662.84	0
10061	VEGFD	0	0	0	0	0	0	0	0	0	0	0	0	0	0	0	0	0	0	0	0	0	0	0	0	0	0	0	Eutherian S2/S3	662.84	0
10062	PIR	0	0	0	0	0	0	0	0	0	0	0	0	0	0	0	0	0	0	0	0	0	0	0	0	0	0	0	Eutherian S2/S3	662.84	0
10063	BMX	0	0	0	0	0	0	0	0	0	0	0	0	0	0	0	0	0	0	0	0	0	0	0	0	0	0	0	Eutherian S2/S3	662.84	0
10064	ACE2	0	0	0	0	0	0	0	0	0	0	0	0	0	0	0	0	0	0	0	0	0	0	0	0	0	0	0	Eutherian S2/S3	662.84	0
10065	CLTRN	0	0	0	0	0	0	0	0	0	0	0	0	0	0	0	0	0	0	0	0	0	0	0	0	0	0	0	Eutherian S2/S3	662.84	0
10066	CA5B	0	0	0	0	0	0	0	0	0	0	0	0	0	0	0	0	0	0	0	0	0	0	0	0	0	0	0	Eutherian S2/S3	662.84	0
10067	ZRSR2	0	0	0	0	0	0	0	0	0	0	0	0	0	0	0	0	77	1	62	0	16	18	0	0	0	0	174	Eutherian S2/S3	662.84	0.262507
10068	AP1S2	0	0	0	0	0	0	0	0	0	0	0	0	0	0	0	0	77	1	0	0	0	18	0	0	0	0	96	Eutherian S2/S3	662.84	0.144831
10069	GRPR	0	0	0	0	0	0	0	0	0	0	0	0	0	0	0	0	0	0	0	0	0	0	0	0	0	0	0	Eutherian S2/S3	662.84	0
10070	MAGEB17	0	0	0	0	0	0	0	0	0	0	0	0	0	0	0	0	0	0	0	0	0	0	0	0	0	0	0	Eutherian S2/S3	662.84	0
10071	CTPS2	0	0	0	0	0	0	0	0	0	0	0	0	0	0	0	0	0	0	0	0	0	0	0	0	0	0	0	Eutherian S2/S3	662.84	0
10072	S100G	0	0	0	0	0	0	0	0	0	0	0	0	0	0	0	0	0	0	0	0	0	0	0	0	0	0	0	Eutherian S2/S3	662.84	0
10073	SYAP1	0	0	0	0	0	0	0	0	0	0	0	0	0	0	0	0	0	0	0	0	0	0	0	0	0	0	0	Eutherian S2/S3	662.84	0
10074	TXLNG	6.7	0	1.9	8.6	20.84	29.44	13.76	0	46.8	0	0	0	6	55	55	22	77	1	0	62	16	18	0	0	0	0	440.04	Eutherian S2/S3	662.84	0.663871
10075	RBBP7	0	0	0	0	0	0	0	0	0	0	0	0	0	0	0	0	0	0	0	0	0	0	0	0	0	0	0	Eutherian S2/S3	662.84	0
10076	REPS2	0	0	0	0	0	0	0	0	0	0	0	0	0	0	0	0	0	0	0	0	0	0	0	0	0	0	0	Eutherian S2/S3	662.84	0
10077	NHS	0	0	0	0	0	0	0	0	0	0	0	0	0	0	0	0	0	0	0	0	0	0	0	0	0	0	0	Eutherian S2/S3	662.84	0
10078	SCML1	0	0	0	0	0	0	0	0	0	0	0	0	0	0	0	0	0	0	0	0	0	0	0	0	0	0	0	Eutherian S2/S3	662.84	0
10079	RAI2	0	0	0	0	0	0	0	0	0	0	0	0	0	0	0	0	0	0	0	0	0	0	0	0	0	0	0	Eutherian S2/S3	662.84	0
10080	BEND2	0	0	0	0	0	0	0	0	0	0	0	0	0	0	0	0	0	0	0	0	0	0	0	0	0	0	0	Eutherian S2/S3	662.84	0
10081	SCML2	0	0	0	0	0	0	0	0	0	0	0	0	0	0	0	0	0	0	0	0	0	0	0	0	0	0	0	Eutherian S2/S3	662.84	0
10082	CDKL5	0	0	0	0	0	0	0	0	0	0	0	0	0	0	0	0	0	0	0	0	0	0	0	0	0	0	0	Eutherian S2/S3	662.84	0
10083	RS1	0	0	0	0	0	0	0	0	0	0	0	0	0	0	0	0	0	0	0	0	0	0	0	0	0	0	0	Eutherian S2/S3	662.84	0
10084	PPEF1	0	0	0	0	0	0	0	0	0	0	0	0	0	0	0	0	0	0	0	0	0	0	0	0	0	0	0	Eutherian S2/S3	662.84	0
10085	PHKA2	0	0	0	0	0	0	0	0	0	0	0	0	0	0	0	0	0	0	0	0	0	0	0	0	0	0	0	Eutherian S2/S3	662.84	0
10086	ADGRG2	0	0	0	0	0	0	0	0	0	0	0	0	0	0	0	0	0	0	0	0	0	0	0	0	0	0	0	Eutherian S2/S3	662.84	0
10087	PDHA1	0	0	0	0	0	0	0	0	0	0	0	0	0	0	0	0	0	0	0	0	0	0	0	0	0	0	0	Eutherian S2/S3	662.84	0
10088	MAP3K15	0	0	0	0	0	0	0	0	0	0	0	0	0	0	0	0	0	0	0	0	0	0	0	0	0	0	0	Eutherian S2/S3	662.84	0
10089	SH3KBP1	0	0	0	0	0	0	0	0	0	0	0	0	0	0	0	0	0	0	0	0	0	0	0	0	0	0	0	Eutherian S2/S3	662.84	0
10090	BCLAF3	0	0	0	0	0	0	0	0	0	0	0	0	0	0	0	0	0	0	0	0	0	0	0	0	0	0	0	Eutherian S2/S3	662.84	0
10091	MAP7D2	0	0	0	0	0	0	0	0	0	0	0	0	0	0	0	0	0	0	0	0	0	0	0	0	0	0	0	Eutherian S2/S3	662.84	0
10092	EIF1AX	6.7	6.7	1.9	8.6	20.84	29.44	13.76	43.2	46.8	0	0	0	6	55	55	22	77	1	62	62	16	18	0	0	0	0	551.94	Eutherian S2/S3	662.84	0.83269
10093	RPS6KA3	0	0	0	0	0	0	0	0	0	0	0	0	0	0	0	0	0	0	0	0	0	0	0	0	0	0	0	Eutherian S2/S3	662.84	0
10094	CNKSR2	0	0	0	0	0	0	0	0	0	0	0	0	0	0	0	0	0	0	0	0	0	0	0	0	0	0	0	Eutherian S2/S3	662.84	0
10095	KLHL34	0	0	0	0	0	0	0	0	0	0	0	0	0	0	0	0	0	0	0	0	0	0	0	0	0	0	0	Eutherian S2/S3	662.84	0
10096	SMPX	0	0	0	0	0	0	0	0	0	0	0	0	0	0	0	0	0	0	0	0	0	0	0	0	0	0	0	Eutherian S2/S3	662.84	0
10097	MBTPS2	0	0	0	0	0	0	0	0	0	0	0	0	0	0	0	0	0	0	0	0	0	0	0	0	0	0	0	Eutherian S2/S3	662.84	0
10098	YY2	0	0	0	0	0	0	0	0	0	0	0	0	0	0	0	0	0	0	0	0	0	0	0	0	0	0	0	Eutherian S2/S3	662.84	0
10099	SMS	0	0	0	0	0	0	0	0	0	0	0	0	0	0	0	0	0	0	0	0	0	0	0	0	0	0	0	Eutherian S2/S3	662.84	0
10100	PHEX	0	0	0	0	0	0	0	0	0	0	0	0	0	0	0	0	0	0	0	0	0	0	0	0	0	0	0	Eutherian S2/S3	662.84	0
10101	CBLL2	0	0	0	0	0	0	0	0	0	0	0	0	0	0	0	0	0	0	0	0	0	0	0	0	0	0	0	Eutherian S2/S3	662.84	0
10102	PTCHD1	0	0	0	0	0	0	0	0	0	0	0	0	0	0	0	0	0	0	0	0	0	0	0	0	0	0	0	Eutherian S2/S3	662.84	0
10103	PRDX4	0	0	0	0	0	0	0	0	0	0	0	0	0	0	0	0	0	0	0	0	0	0	0	0	0	0	0	Eutherian S2/S3	662.84	0
10104	ACOT9	0	0	0	0	0	0	0	0	0	0	0	0	0	0	0	0	0	0	0	0	0	0	0	0	0	0	0	Eutherian S2/S3	662.84	0
10105	SAT1	0	0	0	0	0	0	0	0	0	0	0	0	0	0	0	0	0	0	0	0	0	0	0	0	0	0	0	Eutherian S2/S3	662.84	0
10106	APOO	0	0	0	0	0	0	0	0	0	0	0	0	0	0	0	0	0	0	0	0	0	0	0	0	0	0	0	Eutherian S2/S3	662.84	0
10107	CXorf58	0	0	0	0	0	0	0	0	0	0	0	0	0	0	0	0	0	0	0	0	0	0	0	0	0	0	0	Eutherian S2/S3	662.84	0
10108	KLHL15	0	0	0	0	0	0	0	0	0	0	0	0	0	0	0	0	0	0	0	0	0	0	0	0	0	0	0	Eutherian S2/S3	662.84	0
10109	EIF2S3	0	0	0	0	0	0	0	0	0	20.9	20.9	69.1	6	55	55	22	77	1	62	62	16	18	0	0	0	0	484.9	Eutherian S2/S3	662.84	0.731549
10110	ZFX	6.7	6.7	1.9	8.6	20.84	29.44	13.76	43.2	46.8	20.9	20.9	69.1	6	55	55	22	77	1	62	62	16	18	0	0	0	0	662.84	Eutherian S2/S3	662.84	1
10111	SLC51A	0	0	0	0	0	0	0	0	0	0	0	0	0	0	0	0	0	0	0	0	0	0	0	0	0	0	0	Eutherian S2/S3	662.84	0
10112	SUPT20HL2	0	0	0	0	0	0	0	0	0	0	0	0	0	0	0	0	0	0	0	0	0	0	0	0	0	0	0	Eutherian S2/S3	662.84	0
10113	SUPT20HL1	0	0	0	0	0	0	0	0	0	0	0	0	0	0	0	0	0	0	0	0	0	0	0	0	0	0	0	Eutherian S2/S3	662.84	0
10114	PDK3	0	0	0	0	0	0	0	0	0	0	0	0	0	0	0	0	0	0	0	0	0	0	0	0	0	0	0	Eutherian S2/S3	662.84	0
10115	PCYT1B	0	0	0	0	0	0	0	0	0	0	0	0	0	0	0	0	0	0	0	0	0	0	0	0	0	0	0	Eutherian S2/S3	662.84	0
10116	POLA1	0	0	0	0	0	0	0	0	0	0	0	0	0	0	0	0	0	0	0	0	0	0	0	0	0	0	0	Eutherian S2/S3	662.84	0
10117	ARX	0	0	0	0	0	0	0	0	0	0	0	0	0	0	0	0	0	0	0	0	0	0	0	0	0	0	0	Eutherian S2/S3	662.84	0
10118	MAGEB18	0	0	0	0	0	0	0	0	0	0	0	0	0	0	0	0	0	0	0	0	0	0	0	0	0	0	0	Eutherian S2/S3	662.84	0
10119	MAGEB6	0	0	0	0	0	0	0	0	0	0	0	0	0	0	0	0	0	0	0	0	0	0	0	0	0	0	0	Eutherian S2/S3	662.84	0
10120	MAGEB5	0	0	0	0	0	0	0	0	0	0	0	0	0	0	0	0	0	0	0	0	0	0	0	0	0	0	0	Eutherian S2/S3	662.84	0
10121	DCAF8L1	0	0	0	0	0	0	0	0	0	0	0	0	0	0	0	0	0	0	0	0	0	0	0	0	0	0	0	Eutherian S2/S3	662.84	0
10122	MAGEB10	0	0	0	0	0	0	0	0	0	0	0	0	0	0	0	0	0	0	0	0	0	0	0	0	0	0	0	Eutherian S2/S3	662.84	0
10123	IL1RAPL1	0	0	0	0	0	0	0	0	0	0	0	0	0	0	0	0	0	0	0	0	0	0	0	0	0	0	0	Eutherian S2/S3	662.84	0
10124	MAGEB1	0	0	0	0	0	0	0	0	0	0	0	0	0	0	0	0	0	0	0	0	0	0	0	0	0	0	0	Eutherian S2/S3	662.84	0
10125	NR0B1	0	0	0	0	0	0	0	0	0	0	0	0	0	0	0	0	0	0	0	0	0	0	0	0	0	0	0	Eutherian S2/S3	662.84	0
10126	TASL	0	0	0	0	0	0	0	0	0	0	0	0	0	0	0	0	0	0	0	0	0	0	0	0	0	0	0	Eutherian S2/S3	662.84	0
10127	GK	0	0	0	0	0	0	0	0	0	0	0	0	0	0	0	0	0	0	0	0	0	0	0	0	0	0	0	Eutherian S2/S3	662.84	0
10128	TAB3	0	0	0	0	0	0	0	0	0	0	0	0	0	0	0	0	77	1	0	0	0	18	0	0	0	0	96	Eutherian S2/S3	662.84	0.144831
10129	FTHL17	0	0	0	0	0	0	0	0	0	0	0	0	0	0	0	0	0	0	0	0	0	0	0	0	0	0	0	Eutherian S2/S3	662.84	0
10130	DMD	0	0	0	0	0	0	0	0	0	0	0	0	0	0	0	0	0	0	0	0	0	0	0	0	0	0	0	Eutherian S2/S3	662.84	0
10131	TMEM47	0	0	0	0	0	0	0	0	0	0	0	0	0	0	0	0	0	0	0	0	0	0	0	0	0	0	0	Eutherian S2/S3	662.84	0
10132	Siah1b	0	0	0	0	0	0	0	0	0	0	0	0	0	0	0	0	0	0	0	0	0	0	0	0	0	0	0	Eutherian S2/S3	662.84	0
10133	MAGEB16	0	0	0	0	0	0	0	0	0	0	0	0	0	0	0	0	0	0	0	0	0	0	0	0	0	0	0	Eutherian S2/S3	662.84	0
10134	CFAP47	0	0	0	0	0	0	0	0	0	0	0	0	0	0	0	0	0	0	0	0	0	0	0	0	0	0	0	Eutherian S2/S3	662.84	0
10135	FAM47C	0	0	0	0	0	0	0	0	0	0	0	0	0	0	0	0	0	0	0	0	0	0	0	0	0	0	0	Eutherian S2/S3	662.84	0
10136	PRRG1	0	0	0	0	0	0	0	0	0	0	0	0	0	0	0	0	0	0	0	0	0	0	0	0	0	0	0	Eutherian S2/S3	662.84	0
10137	Fthl17f	0	0	0	0	0	0	0	0	0	0	0	0	0	0	0	0	0	0	0	0	0	0	0	0	0	0	0	Eutherian S2/S3	662.84	0
10138	Fthl17b	0	0	0	0	0	0	0	0	0	0	0	0	0	0	0	0	0	0	0	0	0	0	0	0	0	0	0	Eutherian S2/S3	662.84	0
10139	Fthl17c	0	0	0	0	0	0	0	0	0	0	0	0	0	0	0	0	0	0	0	0	0	0	0	0	0	0	0	Eutherian S2/S3	662.84	0
10140	LANCL3	0	0	0	0	0	0	0	0	0	0	0	0	0	0	0	0	0	0	0	0	0	0	0	0	0	0	0	Eutherian S2/S3	662.84	0
10141	XK	0	0	0	0	0	0	0	0	0	0	0	0	0	0	0	0	0	0	0	0	0	0	0	0	0	0	0	Eutherian S2/S3	662.84	0
10142	CYBB	0	0	0	0	0	0	0	0	0	0	0	0	0	0	0	0	0	0	0	0	0	0	0	0	0	0	0	Eutherian S2/S3	662.84	0
10143	DYNLT3	0	0	0	0	0	0	0	0	0	0	0	0	0	0	0	0	0	0	0	0	0	0	0	0	0	0	0	Eutherian S2/S3	662.84	0
10144	H2AP	0	0	0	0	0	0	0	0	0	0	0	0	0	0	0	0	0	0	0	0	0	0	0	0	0	0	0	Eutherian S2/S3	662.84	0
10145	H2al3	0	0	0	0	0	0	0	0	0	0	0	0	0	0	0	0	0	0	0	0	0	0	0	0	0	0	0	Eutherian S2/S3	662.84	0
10146	SYTL5	0	0	0	0	0	0	0	0	0	0	0	0	0	0	0	0	0	0	0	0	0	0	0	0	0	0	0	Eutherian S2/S3	662.84	0
10147	SRPX	0	0	0	0	0	0	0	0	0	0	0	0	0	0	0	0	0	0	0	0	0	0	0	0	0	0	0	Eutherian S2/S3	662.84	0
10148	RPGR	0	0	0	0	0	0	0	0	0	0	0	0	0	0	0	0	0	0	0	0	0	0	0	0	0	0	0	Eutherian S2/S3	662.84	0
10149	OTC	0	0	0	0	0	0	0	0	0	0	0	0	0	0	0	0	0	0	0	0	0	0	0	0	0	0	0	Eutherian S2/S3	662.84	0
10150	TSPAN7	0	0	0	0	0	0	0	0	0	0	0	0	0	0	0	0	0	0	0	0	0	0	0	0	0	0	0	Eutherian S2/S3	662.84	0
10151	MID1IP1	0	0	0	0	0	0	0	0	0	0	0	0	0	0	0	0	0	0	0	0	0	0	0	0	0	0	0	Eutherian S2/S3	662.84	0
10152	BCOR	0	0	0	0	0	0	0	0	0	0	0	0	0	55	0	22	77	1	0	0	0	18	0	0	0	0	173	Eutherian S2/S3	662.84	0.260998
10153	ATP6AP2	0	0	0	0	0	0	0	0	0	0	0	0	0	0	0	0	0	0	0	0	0	0	0	0	0	0	0	Eutherian S2/S3	662.84	0
10154	MPC1L	0	0	0	0	0	0	0	0	0	0	0	0	0	0	0	0	0	0	0	0	0	0	0	0	0	0	0	Eutherian S2/S3	662.84	0
10155	CXorf38	0	0	0	0	0	0	0	0	0	0	0	0	0	0	0	0	0	0	0	0	0	0	0	0	0	0	0	Eutherian S2/S3	662.84	0
10156	MED14	0	0	0	0	0	0	0	0	0	0	20.9	0	0	0	0	0	0	0	0	0	0	0	0	0	0	0	20.9	Eutherian S2/S3 & Rat MED14 X transposed region	683.74	0.0305672
10157	USP9X	6.7	0	1.9	8.6	20.84	29.44	13.76	43.2	46.8	20.9	20.9	69.1	6	55	55	22	77	1	62	62	16	18	0	0	0	0	656.14	Eutherian S2/S3	662.84	0.989892
10158	DDX3X	6.7	6.7	1.9	8.6	20.84	29.44	13.76	43.2	46.8	20.9	20.9	69.1	6	55	55	22	77	1	62	62	16	18	0	0	0	0	662.84	Eutherian S2/S3	662.84	1
10159	NYX	0	0	0	0	0	0	0	0	0	0	0	0	0	0	0	0	0	0	0	0	0	0	0	0	0	0	0	Eutherian S2/S3	662.84	0
10160	CASK	0	0	0	0	0	0	0	0	0	0	0	0	0	0	0	0	0	0	0	0	0	0	0	0	0	0	0	Eutherian S2/S3	662.84	0
10161	GPR34	0	0	0	0	0	0	0	0	0	0	0	0	0	0	0	0	0	0	0	0	0	0	0	0	0	0	0	Eutherian S2/S3	662.84	0
10162	GPR82	0	0	0	0	0	0	0	0	0	0	0	0	0	0	0	0	0	0	0	0	0	0	0	0	0	0	0	Eutherian S2/S3	662.84	0
10163	MAOA	0	0	0	0	0	0	0	0	0	0	0	0	0	0	0	0	0	0	0	0	0	0	0	0	0	0	0	Eutherian S2/S3	662.84	0
10164	MAOB	0	0	0	0	0	0	0	0	0	0	0	0	0	0	0	0	0	0	0	0	0	0	0	0	0	0	0	Eutherian S2/S3	662.84	0
10165	NDP	0	0	0	0	0	0	0	0	0	0	0	0	0	0	0	0	0	0	0	0	0	0	0	0	0	0	0	Eutherian S2/S3	662.84	0
10166	EFHC2	0	0	0	0	0	0	0	0	0	0	0	0	0	0	0	0	0	0	0	0	0	0	0	0	0	0	0	Eutherian S2/S3	662.84	0
10167	FUNDC1	0	0	0	0	0	0	0	0	0	0	0	0	0	0	0	0	0	0	0	0	0	0	0	0	0	0	0	Eutherian S2/S3	662.84	0
10168	DUSP21	0	0	0	0	0	0	0	0	0	0	0	0	0	0	0	0	0	0	0	0	0	0	0	0	0	0	0	Eutherian S2/S3	662.84	0
10169	KDM6A	6.7	6.7	1.9	8.6	20.84	29.44	13.76	43.2	46.8	20.9	20.9	69.1	6	55	55	22	77	1	62	62	16	18	0	0	0	0	662.84	Eutherian S2/S3	662.84	1
10170	DIPK2B	0	0	0	0	0	0	0	0	0	0	0	0	0	0	0	0	0	0	0	0	0	0	0	0	0	0	0	Eutherian S2/S3	662.84	0
10171	ZNF674	0	0	0	0	0	0	0	0	0	0	0	0	0	0	0	0	0	0	0	0	0	0	0	0	0	0	0	Eutherian S2/S3	662.84	0
10172	CHST7	0	0	0	0	0	0	0	0	0	0	0	0	0	0	0	0	0	0	0	0	0	0	0	0	0	0	0	Eutherian S2/S3	662.84	0
10173	SLC9A7	0	0	0	0	0	0	0	0	0	0	0	0	0	0	0	0	0	0	0	0	0	0	0	0	0	0	0	Eutherian S2/S3	662.84	0
10174	RP2	0	0	0	0	0	0	0	0	0	0	0	0	0	0	0	0	0	0	0	0	0	0	0	0	0	0	0	Eutherian S2/S3	662.84	0
10175	JADE3	0	0	0	0	0	0	0	0	0	0	0	0	0	0	0	0	0	0	0	0	0	0	0	0	0	0	0	Eutherian S2/S3	662.84	0
10176	RGN	0	0	0	0	0	0	0	0	0	0	0	0	0	0	0	0	0	0	0	0	0	0	0	0	0	0	0	Eutherian S2/S3	662.84	0
10177	NDUFB11	0	0	0	0	0	0	0	0	0	0	0	0	0	0	0	0	0	0	0	0	0	0	0	0	0	0	0	Eutherian S2/S3	662.84	0
10178	RBM10	0	0	0	0	0	0	0	0	0	0	0	0	0	0	0	0	0	0	0	0	0	0	0	82	82	0	164	Eutherian S2/S3 & Metatherian S2	826.84	0.198346
10179	UBA1	0	0	0	0	0	0	0	0	0	20.9	20.9	69.1	6	55	55	22	77	1	0	62	16	18	0	82	82	0	586.9	Eutherian S2/S3 & Metatherian S2	826.84	0.709811
10180	CDK16	0	0	0	0	0	0	0	0	0	0	0	0	0	0	0	0	0	0	0	0	0	0	0	0	0	0	0	Eutherian S2/S3 & Metatherian S2	826.84	0
10181	USP11	0	0	0	0	0	0	0	0	0	0	0	0	0	0	0	0	0	0	0	0	0	0	0	0	0	0	0	Eutherian S2/S3 & Metatherian S2	826.84	0
10182	ZNF157	0	0	0	0	0	0	0	0	0	0	0	0	0	0	0	0	0	0	0	0	0	0	0	0	0	0	0	Eutherian S2/S3 & Metatherian S2	826.84	0
10183	ZNF41	0	0	0	0	0	0	0	0	0	0	0	0	0	0	0	0	0	0	0	0	0	0	0	0	0	0	0	Eutherian S2/S3 & Metatherian S2	826.84	0
10184	ARAF	0	0	0	0	0	0	0	0	0	0	0	0	0	0	0	0	0	0	0	0	0	0	0	0	0	0	0	Eutherian S2/S3 & Metatherian S2	826.84	0
10185	SYN1	0	0	0	0	0	0	0	0	0	0	0	0	0	0	0	0	0	0	0	0	0	0	0	0	0	0	0	Eutherian S2/S3 & Metatherian S2	826.84	0
10186	TIMP1	0	0	0	0	0	0	0	0	0	0	0	0	0	0	0	0	0	0	0	0	0	0	0	0	0	0	0	Eutherian S2/S3 & Metatherian S2	826.84	0
10187	CFP	0	0	0	0	0	0	0	0	0	0	0	0	0	0	0	0	0	0	0	0	0	0	0	0	0	0	0	Eutherian S2/S3 & Metatherian S2	826.84	0
10188	ELK1	0	0	0	0	0	0	0	0	0	0	0	0	0	0	0	0	0	0	0	0	0	0	0	0	0	0	0	Eutherian S2/S3 & Metatherian S2	826.84	0
10189	UXT	0	0	0	0	0	0	0	0	0	0	0	0	0	0	0	0	0	0	0	0	0	0	0	0	0	0	0	Eutherian S2/S3 & Metatherian S2	826.84	0
10190	CXXC1P1	0	0	0	0	0	0	0	0	0	0	0	0	0	0	0	0	0	0	0	0	0	0	0	0	0	0	0	Eutherian S2/S3 & Metatherian S2	826.84	0
10191	ZNF81	0	0	0	0	0	0	0	0	0	0	0	0	0	0	0	0	0	0	0	0	0	0	0	0	0	0	0	Eutherian S2/S3 & Metatherian S2	826.84	0
10192	ZNF182	0	0	0	0	0	0	0	0	0	0	0	0	0	0	0	0	0	0	0	0	0	0	0	0	0	0	0	Eutherian S2/S3 & Metatherian S2	826.84	0
10193	ZNF630	0	0	0	0	0	0	0	0	0	0	0	0	0	0	0	0	0	0	0	0	0	0	0	0	0	0	0	Eutherian S2/S3 & Metatherian S2	826.84	0
10194	SPACA5	0	0	0	0	0	0	0	0	0	0	0	0	0	0	0	0	0	0	0	0	0	0	0	0	0	0	0	Eutherian S2/S3 & Metatherian S2	826.84	0
10195	SSX5	0	0	0	0	0	0	0	0	0	0	0	0	0	0	0	0	0	0	0	0	0	0	0	0	0	0	0	Eutherian S2/S3 & Metatherian S2	826.84	0
10196	SSX1	0	0	0	0	0	0	0	0	0	0	0	0	0	0	0	0	0	0	0	0	0	0	0	0	0	0	0	Eutherian S2/S3 & Metatherian S2	826.84	0
10197	SSX3	0	0	0	0	0	0	0	0	0	0	0	0	0	0	0	0	0	0	0	0	0	0	0	0	0	0	0	Eutherian S2/S3 & Metatherian S2	826.84	0
10198	SSX4	0	0	0	0	0	0	0	0	0	0	0	0	0	0	0	0	0	0	0	0	0	0	0	0	0	0	0	Eutherian S2/S3 & Metatherian S2	826.84	0
10199	SSX4B	0	0	0	0	0	0	0	0	0	0	0	0	0	0	0	0	0	0	0	0	0	0	0	0	0	0	0	Eutherian S2/S3 & Metatherian S2	826.84	0
10200	SLC38A5	0	0	0	0	0	0	0	0	0	0	0	0	0	0	0	0	0	0	0	0	0	0	0	0	0	0	0	Eutherian S2/S3 & Metatherian S2	826.84	0
10201	FTSJ1	0	0	0	0	0	0	0	0	0	0	0	0	0	0	0	0	0	0	0	0	0	0	0	0	0	0	0	Eutherian S2/S3 & Metatherian S2	826.84	0
10202	PORCN	0	0	0	0	0	0	0	0	0	0	0	0	0	0	0	0	0	0	0	0	0	0	0	0	0	0	0	Eutherian S2/S3 & Metatherian S2	826.84	0
10203	EBP	0	0	0	0	0	0	0	0	0	0	0	0	0	0	0	0	0	0	0	0	0	0	0	0	0	0	0	Eutherian S2/S3 & Metatherian S2	826.84	0
10204	TBC1D25	0	0	0	0	0	0	0	0	0	0	0	0	0	0	0	0	0	0	0	0	0	0	0	0	0	0	0	Eutherian S2/S3 & Metatherian S2	826.84	0
10205	RBM3	0	0	0	0	0	0	0	0	0	0	0	0	0	0	0	0	0	0	0	0	0	0	0	0	0	0	0	Eutherian S2/S3 & Metatherian S2	826.84	0
10206	WDR13	0	0	0	0	0	0	0	0	0	0	0	0	0	0	0	0	0	0	0	0	0	0	0	0	0	0	0	Eutherian S2/S3 & Metatherian S2	826.84	0
10207	WAS	0	0	0	0	0	0	0	0	0	0	0	0	0	0	0	0	0	0	0	0	0	0	0	0	0	0	0	Eutherian S2/S3 & Metatherian S2	826.84	0
10208	SUV39H1	0	0	0	0	0	0	0	0	0	0	0	0	0	0	0	0	0	0	0	0	0	0	0	0	0	0	0	Eutherian S2/S3 & Metatherian S2	826.84	0
10209	GLOD5	0	0	0	0	0	0	0	0	0	0	0	0	0	0	0	0	0	0	0	0	0	0	0	0	0	0	0	Eutherian S2/S3 & Metatherian S2	826.84	0
10210	GATA1	0	0	0	0	0	0	0	0	0	0	0	0	0	0	0	0	0	0	0	0	0	0	0	0	0	0	0	Eutherian S2/S3 & Metatherian S2	826.84	0
10211	HDAC6	0	0	0	0	0	0	0	0	0	0	0	0	0	0	0	0	0	0	0	0	0	0	0	0	0	0	0	Eutherian S2/S3 & Metatherian S2	826.84	0
10212	ERAS	0	0	0	0	0	0	0	0	0	0	0	0	0	0	0	0	0	0	0	0	0	0	0	0	0	0	0	Eutherian S2/S3 & Metatherian S2	826.84	0
10213	PCSK1N	0	0	0	0	0	0	0	0	0	0	0	0	0	0	0	0	0	0	0	0	0	0	0	0	0	0	0	Eutherian S2/S3 & Metatherian S2	826.84	0
10214	TIMM17B	0	0	0	0	0	0	0	0	0	0	0	0	0	0	0	0	0	0	0	0	0	0	0	0	0	0	0	Eutherian S2/S3 & Metatherian S2	826.84	0
10215	PQBP1	0	0	0	0	0	0	0	0	0	0	0	0	0	0	0	0	0	0	0	0	0	0	0	0	0	0	0	Eutherian S2/S3 & Metatherian S2	826.84	0
10216	SLC35A2	0	0	0	0	0	0	0	0	0	0	0	0	0	0	0	0	0	0	0	0	0	0	0	0	0	0	0	Eutherian S2/S3 & Metatherian S2	826.84	0
10217	PIM2	0	0	0	0	0	0	0	0	0	0	0	0	0	0	0	0	0	0	0	0	0	0	0	0	0	0	0	Eutherian S2/S3 & Metatherian S2	826.84	0
10218	OTUD5	0	0	0	0	0	0	0	0	0	0	0	0	0	0	0	0	0	0	0	0	0	0	0	82	0	0	82	Eutherian S2/S3 & Metatherian S2	826.84	0.0991728
10219	KCND1	0	0	0	0	0	0	0	0	0	0	0	0	0	0	0	0	0	0	0	0	0	0	0	0	0	0	0	Eutherian S2/S3 & Metatherian S2	826.84	0
10220	GRIPAP1	0	0	0	0	0	0	0	0	0	0	0	0	0	0	0	0	0	0	0	0	0	0	0	0	0	0	0	Eutherian S2/S3 & Metatherian S2	826.84	0
10221	TFE3	0	0	0	0	0	0	0	0	0	0	0	0	0	0	0	0	0	0	0	0	0	0	0	82	0	0	82	Eutherian S2/S3 & Metatherian S2	826.84	0.0991728
10222	CCDC120	0	0	0	0	0	0	0	0	0	0	0	0	0	0	0	0	0	0	0	0	0	0	0	0	0	0	0	Eutherian S2/S3 & Metatherian S2	826.84	0
10223	WDR45	0	0	0	0	0	0	0	0	0	0	0	0	0	0	0	0	0	0	0	0	0	0	0	0	0	0	0	Eutherian S2/S3 & Metatherian S2	826.84	0
10224	PRAF2	0	0	0	0	0	0	0	0	0	0	0	0	0	0	0	0	0	0	0	0	0	0	0	0	0	0	0	Eutherian S2/S3 & Metatherian S2	826.84	0
10225	GPKOW	0	0	0	0	0	0	0	0	0	0	0	0	0	0	0	0	0	0	0	0	0	0	0	0	0	0	0	Eutherian S2/S3 & Metatherian S2	826.84	0
10226	MAGIX	0	0	0	0	0	0	0	0	0	0	0	0	0	0	0	0	0	0	0	0	0	0	0	0	0	0	0	Eutherian S2/S3 & Metatherian S2	826.84	0
10227	PLP2	0	0	0	0	0	0	0	0	0	0	0	0	0	0	0	0	0	0	0	0	0	0	0	0	0	0	0	Eutherian S2/S3 & Metatherian S2	826.84	0
10228	PRICKLE3	0	0	0	0	0	0	0	0	0	0	0	0	0	0	0	0	0	0	0	0	0	0	0	0	0	0	0	Eutherian S2/S3 & Metatherian S2	826.84	0
10229	SYP	0	0	0	0	0	0	0	0	0	0	0	0	0	0	0	0	77	1	0	0	0	18	0	0	0	0	96	Eutherian S2/S3 & Metatherian S2	826.84	0.116105
10230	CACNA1F	0	0	0	0	0	0	0	0	0	0	0	0	0	0	0	0	0	0	0	0	0	0	0	0	0	0	0	Eutherian S2/S3 & Metatherian S2	826.84	0
10231	CCDC22	0	0	0	0	0	0	0	0	0	0	0	0	0	0	0	0	0	0	0	0	0	0	0	0	0	0	0	Eutherian S2/S3 & Metatherian S2	826.84	0
10232	FOXP3	0	0	0	0	0	0	0	0	0	0	0	0	0	0	0	0	0	0	0	0	0	0	0	0	0	0	0	Eutherian S2/S3 & Metatherian S2	826.84	0
10233	PPP1R3F	0	0	0	0	0	0	0	0	0	0	0	0	0	0	0	0	0	0	0	0	0	0	0	0	0	0	0	Eutherian S2/S3 & Metatherian S2	826.84	0
10234	USP27X	0	0	0	0	0	0	0	0	0	0	0	0	0	0	0	0	0	0	0	0	0	0	0	0	0	0	0	Eutherian S2/S3 & Metatherian S2	826.84	0
10235	CLCN5	0	0	0	0	0	0	0	0	0	0	0	0	0	0	0	0	0	0	0	0	0	0	0	0	0	0	0	Eutherian S2/S3 & Metatherian S2	826.84	0
10236	TRAIL-LIKE	0	0	0	0	0	0	0	0	0	0	0	0	0	0	0	0	0	0	0	0	0	0	0	0	0	0	0	Eutherian S2/S3 & Metatherian S2	826.84	0
10237	AKAP4	0	0	0	0	0	0	0	0	0	0	0	0	0	0	0	0	0	0	0	0	0	0	0	0	0	0	0	Eutherian S2/S3 & Metatherian S2	826.84	0
10238	CCNB3	0	0	0	0	0	0	0	0	0	0	0	0	0	0	0	0	0	0	0	0	0	0	0	0	0	0	0	Eutherian S2/S3 & Metatherian S2	826.84	0
10239	DGKK	0	0	0	0	0	0	0	0	0	0	0	0	0	0	0	0	0	0	0	0	0	0	0	0	0	0	0	Eutherian S2/S3 & Metatherian S2	826.84	0
10240	SHROOM4	0	0	0	0	0	0	0	0	0	0	0	0	0	0	0	0	0	0	0	0	0	0	0	0	0	0	0	Eutherian S2/S3 & Metatherian S2	826.84	0
10241	BMP15	0	0	0	0	0	0	0	0	0	0	0	0	0	0	0	0	0	0	0	0	0	0	0	0	0	0	0	Eutherian S2/S3 & Metatherian S2	826.84	0
10242	NUDT10	0	0	0	0	0	0	0	0	0	0	0	0	0	0	0	0	0	0	0	0	0	0	0	0	0	0	0	Eutherian S2/S3 & Metatherian S2	826.84	0
10243	EZHIP	0	0	0	0	0	0	0	0	0	0	0	0	0	0	0	0	0	0	0	0	0	0	0	0	0	0	0	Eutherian S2/S3 & Metatherian S2	826.84	0
10244	NUDT11	0	0	0	0	0	0	0	0	0	0	0	0	0	0	0	0	0	0	0	0	0	0	0	0	0	0	0	Eutherian S2/S3 & Metatherian S2	826.84	0
10245	GSPT2	0	0	0	0	0	0	0	0	0	0	0	0	0	0	0	0	0	0	0	0	0	0	0	0	0	0	0	Eutherian S2/S3 & Metatherian S2	826.84	0
10246	MAGED1	0	0	0	0	0	0	0	0	0	0	0	0	0	0	0	0	0	0	0	0	0	0	0	0	0	0	0	Eutherian S2/S3 & Metatherian S2	826.84	0
10247	SSX7	0	0	0	0	0	0	0	0	0	0	0	0	0	0	0	0	0	0	0	0	0	0	0	0	0	0	0	Eutherian S2/S3 & Metatherian S2	826.84	0
10248	SSX2	0	0	0	0	0	0	0	0	0	0	0	0	0	0	0	0	0	0	0	0	0	0	0	0	0	0	0	Eutherian S2/S3 & Metatherian S2	826.84	0
10249	SSX2B	0	0	0	0	0	0	0	0	0	0	0	0	0	0	0	0	0	0	0	0	0	0	0	0	0	0	0	Eutherian S2/S3 & Metatherian S2	826.84	0
10250	FAM156B	0	0	0	0	0	0	0	0	0	0	0	0	0	0	0	0	0	0	0	0	0	0	0	0	0	0	0	Eutherian S2/S3 & Metatherian S2	826.84	0
10251	GPR173	0	0	0	0	0	0	0	0	0	0	0	0	0	0	0	0	0	0	0	0	0	0	0	0	0	0	0	Eutherian S2/S3 & Metatherian S2	826.84	0
10252	TSPYL2	6.7	6.7	1.9	8.6	20.84	29.44	13.76	43.2	46.8	0	20.9	69.1	6	55	55	22	77	1	62	62	16	18	0	0	0	0	641.94	Eutherian S2/S3 & Metatherian S2	826.84	0.776378
10253	KDM5C	6.7	6.7	1.9	8.6	20.84	29.44	13.76	43.2	46.8	20.9	20.9	69.1	6	55	55	22	77	1	0	0	0	18	0	82	82	0	686.84	Eutherian S2/S3 & Metatherian S2	826.84	0.830681
10254	IQSEC2	0	0	0	0	0	0	0	0	0	0	0	0	0	0	0	0	0	0	0	0	0	0	0	0	0	0	0	Eutherian S2/S3 & Metatherian S2	826.84	0
10255	SMC1A	0	0	0	0	0	0	0	0	0	0	0	0	0	0	0	0	0	0	0	0	0	0	0	0	0	0	0	Eutherian S2/S3 & Metatherian S2	826.84	0
10256	RIBC1	0	0	0	0	0	0	0	0	0	0	0	0	0	0	0	0	0	0	0	0	0	0	0	0	0	0	0	Eutherian S2/S3 & Metatherian S2	826.84	0
10257	HSD17B10	0	0	0	0	0	0	0	0	0	0	0	0	0	0	0	0	0	0	0	0	0	0	0	0	0	0	0	Eutherian S2/S3 & Metatherian S2	826.84	0
10258	HUWE1	0	0	0	0	0	0	0	0	0	0	0	0	0	0	0	0	0	0	0	0	0	0	0	82	82	0	164	Eutherian S2/S3 & Metatherian S2	826.84	0.198346
10259	PHF8	0	0	0	0	0	0	0	0	0	0	0	0	0	0	0	0	0	0	0	0	0	0	0	0	0	0	0	Eutherian S2/S3 & Metatherian S2	826.84	0
10260	FAM120C	0	0	0	0	0	0	0	0	0	0	0	0	0	0	0	0	0	0	0	0	0	0	0	0	0	0	0	Eutherian S2/S3 & Metatherian S2	826.84	0
10261	WNK3	0	0	0	0	0	0	0	0	0	0	0	0	0	0	0	0	0	0	0	0	0	0	0	0	0	0	0	Eutherian S2/S3 & Metatherian S2	826.84	0
10262	TSR2	0	0	0	0	0	0	0	0	0	0	0	0	0	0	0	0	0	0	0	0	0	0	0	0	0	0	0	Eutherian S2/S3 & Metatherian S2	826.84	0
10263	FGD1	0	0	0	0	0	0	0	0	0	0	0	0	0	0	0	0	0	0	0	0	0	0	0	0	0	0	0	Eutherian S2/S3 & Metatherian S2	826.84	0
10264	GNL3L	0	0	0	0	0	0	0	0	0	0	0	0	0	0	0	0	0	0	0	0	0	0	0	0	0	0	0	Eutherian S2/S3 & Metatherian S2	826.84	0
10265	ITIH6	0	0	0	0	0	0	0	0	0	0	0	0	0	0	0	0	0	0	0	0	0	0	0	0	0	0	0	Eutherian S2/S3 & Metatherian S2	826.84	0
10266	MAGED2	0	0	0	0	0	0	0	0	0	0	0	0	0	0	0	0	0	0	0	0	0	0	0	0	0	0	0	Eutherian S2/S3 & Metatherian S2	826.84	0
10267	TRO	0	0	0	0	0	0	0	0	0	0	0	0	0	0	0	0	0	0	0	0	0	0	0	0	0	0	0	Eutherian S2/S3 & Metatherian S2	826.84	0
10268	PFKFB1	0	0	0	0	0	0	0	0	0	0	0	0	0	0	0	0	0	0	0	0	0	0	0	0	0	0	0	Eutherian S2/S3 & Metatherian S2	826.84	0
10269	APEX2	0	0	0	0	0	0	0	0	0	0	0	0	0	0	0	0	0	0	0	0	0	0	0	0	0	0	0	Eutherian S2/S3 & Metatherian S2	826.84	0
10270	ALAS2	0	0	0	0	0	0	0	0	0	0	0	0	0	0	0	0	0	0	0	0	0	0	0	0	0	0	0	Eutherian S2/S3 & Metatherian S2	826.84	0
10271	MAGEH1	0	0	0	0	0	0	0	0	0	0	0	0	0	0	0	0	0	0	0	0	0	0	0	0	0	0	0	Eutherian S2/S3 & Metatherian S2	826.84	0
10272	USP51	0	0	0	0	0	0	0	0	0	0	0	0	0	0	0	0	0	0	0	0	0	0	0	0	0	0	0	Eutherian S2/S3 & Metatherian S2	826.84	0
10273	FOXR2	0	0	0	0	0	0	0	0	0	0	0	0	0	0	0	0	0	0	0	0	0	0	0	0	0	0	0	Eutherian S2/S3 & Metatherian S2	826.84	0
10274	RRAGB	0	0	0	0	0	0	0	0	0	0	0	0	0	0	0	0	0	0	0	0	0	0	0	0	0	0	0	Eutherian S2/S3 & Metatherian S2	826.84	0
10275	KLF8	0	0	0	0	0	0	0	0	0	0	0	0	0	0	0	0	0	0	0	0	0	0	0	0	0	0	0	Eutherian S2/S3 & Metatherian S2	826.84	0
10276	UBQLN2	0	0	0	0	0	0	0	0	0	0	0	0	0	0	0	0	0	0	0	0	0	0	0	0	0	0	0	Eutherian S2/S3 & Metatherian S2	826.84	0
10277	SPIN3	0	0	0	0	0	0	0	0	0	0	0	0	0	0	0	0	0	0	0	0	0	0	0	0	0	0	0	Eutherian S2/S3 & Metatherian S2	826.84	0
10278	SPIN2B	0	0	0	0	0	0	0	0	0	0	0	0	0	0	0	0	0	0	0	0	0	0	0	0	0	0	0	Eutherian S2/S3 & Metatherian S2	826.84	0
10279	SPIN2A	0	0	0	0	0	0	0	0	0	0	0	0	0	0	0	0	0	0	0	0	0	0	0	0	0	0	0	Eutherian S2/S3 & Metatherian S2	826.84	0
10280	FAAH2	0	0	0	0	0	0	0	0	0	0	0	0	0	0	0	0	0	0	0	0	0	0	0	0	0	0	0	Eutherian S2/S3 & Metatherian S2	826.84	0
10281	ZXDB	0	0	0	0	0	0	0	0	0	0	0	0	0	0	0	0	0	0	0	0	0	0	0	0	0	0	0	Eutherian S2/S3 & Metatherian S2	826.84	0
10282	ZXDA	0	0	0	0	0	0	0	0	0	0	0	0	0	0	0	0	0	0	0	0	0	0	0	0	0	0	0	Eutherian S2/S3 & Metatherian S2	826.84	0
10283	ARHGEF9	0	0	0	0	0	0	0	0	0	0	0	0	0	0	0	0	0	0	0	0	0	0	0	0	0	0	0	Therian S1	966.84	0
10284	AMER1	0	0	0	0	0	0	0	0	0	0	0	0	0	0	0	0	0	0	0	0	0	0	0	0	0	0	0	Therian S1	966.84	0
10285	ASB12	0	0	0	0	0	0	0	0	0	0	0	0	0	0	0	0	0	0	0	0	0	0	0	0	0	0	0	Therian S1	966.84	0
10286	MTMR8	0	0	0	0	0	0	0	0	0	0	0	0	0	0	0	0	0	0	0	0	0	0	0	0	0	0	0	Therian S1	966.84	0
10287	ZC4H2	0	0	0	0	0	0	0	0	0	0	0	0	0	0	0	0	0	0	0	0	0	0	0	0	0	0	0	Therian S1	966.84	0
10288	ZC3H12B	0	0	0	0	0	0	0	0	0	0	0	0	0	0	0	0	0	0	0	0	0	0	0	0	0	0	0	Therian S1	966.84	0
10289	LAS1L	0	0	0	0	0	0	0	0	0	0	0	0	0	0	0	0	0	0	0	0	0	0	0	0	0	0	0	Therian S1	966.84	0
10290	MSN	0	0	0	0	0	0	0	0	0	0	0	0	0	0	0	0	0	0	0	0	0	0	0	0	0	0	0	Therian S1	966.84	0
10291	LOC103099650	0	0	0	0	0	0	0	0	0	0	0	0	0	0	0	0	0	0	0	0	0	0	0	0	0	0	0	Therian S1	966.84	0
10292	TAGAP	0	0	0	0	0	0	0	0	0	0	0	0	0	0	0	0	0	0	0	0	0	0	0	0	0	0	0	Therian S1	966.84	0
10293	VSIG4	0	0	0	0	0	0	0	0	0	0	0	0	0	0	0	0	0	0	0	0	0	0	0	0	0	0	0	Therian S1	966.84	0
10294	Hsf3	0	0	0	0	0	0	0	0	0	0	0	0	0	0	0	0	0	0	0	0	0	0	0	0	0	0	0	Therian S1	966.84	0
10295	HEPH	0	0	0	0	0	0	0	0	0	0	0	0	0	0	0	0	0	0	0	0	0	0	0	0	0	0	0	Therian S1	966.84	0
10296	Gpr165	0	0	0	0	0	0	0	0	0	0	0	0	0	0	0	0	0	0	0	0	0	0	0	0	0	0	0	Therian S1	966.84	0
10297	EDA2R	0	0	0	0	0	0	0	0	0	0	0	0	0	0	0	0	0	0	0	0	0	0	0	0	0	0	0	Therian S1	966.84	0
10298	AR	0	0	0	0	0	0	0	0	0	0	0	0	0	0	0	0	0	0	0	0	0	0	0	0	0	0	0	Therian S1	966.84	0
10299	OPHN1	0	0	0	0	0	0	0	0	0	0	0	0	0	0	0	0	0	0	0	0	0	0	0	0	0	0	0	Therian S1	966.84	0
10300	YIPF6	0	0	0	0	0	0	0	0	0	0	0	0	0	0	0	0	0	0	0	0	0	0	0	0	0	0	0	Therian S1	966.84	0
10301	STARD8	0	0	0	0	0	0	0	0	0	0	0	0	0	0	0	0	0	0	0	0	0	0	0	0	0	0	0	Therian S1	966.84	0
10302	EFNB1	0	0	0	0	0	0	0	0	0	0	0	0	0	0	0	0	0	0	0	0	0	0	0	0	0	0	0	Therian S1	966.84	0
10303	FAM155B	0	0	0	0	0	0	0	0	0	0	0	0	0	0	0	0	0	0	0	0	0	0	0	0	0	0	0	Therian S1	966.84	0
10304	EDA	0	0	0	0	0	0	0	0	0	0	0	0	0	0	0	0	0	0	0	0	0	0	0	0	0	0	0	Therian S1	966.84	0
10305	AWAT2	0	0	0	0	0	0	0	0	0	0	0	0	0	0	0	0	0	0	0	0	0	0	0	0	0	0	0	Therian S1	966.84	0
10306	IGBP1	0	0	0	0	0	0	0	0	0	0	0	0	0	0	0	0	0	0	0	0	0	0	0	0	0	0	0	Therian S1	966.84	0
10307	DGAT2L6	0	0	0	0	0	0	0	0	0	0	0	0	0	0	0	0	0	0	0	0	0	0	0	0	0	0	0	Therian S1	966.84	0
10308	AWAT1	0	0	0	0	0	0	0	0	0	0	0	0	0	0	0	0	0	0	0	0	0	0	0	0	0	0	0	Therian S1	966.84	0
10309	P2RY4	0	0	0	0	0	0	0	0	0	0	0	0	0	0	0	0	0	0	0	0	0	0	0	0	0	0	0	Therian S1	966.84	0
10310	ARR3	0	0	0	0	0	0	0	0	0	0	0	0	0	0	0	0	0	0	0	0	0	0	0	0	0	0	0	Therian S1	966.84	0
10311	RAB41	0	0	0	0	0	0	0	0	0	0	0	0	0	0	0	0	0	0	0	0	0	0	0	0	0	0	0	Therian S1	966.84	0
10312	PDZD11	0	0	0	0	0	0	0	0	0	0	0	0	0	0	0	0	0	0	0	0	0	0	0	0	0	0	0	Therian S1	966.84	0
10313	KIF4B	0	0	0	0	0	0	0	0	0	0	0	0	0	0	0	0	0	0	0	0	0	0	0	0	0	0	0	Therian S1	966.84	0
10314	GDPD2	0	0	0	0	0	0	0	0	0	0	0	0	0	0	0	0	0	0	0	0	0	0	0	0	0	0	0	Therian S1	966.84	0
10315	DLG3	0	0	0	0	0	0	0	0	0	0	0	0	0	0	0	0	0	0	0	0	0	0	0	0	0	0	0	Therian S1	966.84	0
10316	TEX11	0	0	0	0	0	0	0	0	0	0	0	0	0	0	0	0	0	0	0	0	0	0	0	0	0	0	0	Therian S1	966.84	0
10317	SLC7A3	0	0	0	0	0	0	0	0	0	0	0	0	0	0	0	0	0	0	0	0	0	0	0	0	0	0	0	Therian S1	966.84	0
10318	SNX12	0	0	0	0	0	0	0	0	0	0	0	0	0	0	0	0	0	0	0	0	0	0	0	0	0	0	0	Therian S1	966.84	0
10319	FOXO4	0	0	0	0	0	0	0	0	0	0	0	0	0	0	0	0	0	0	0	0	0	0	0	0	0	0	0	Therian S1	966.84	0
10320	CXorf65	0	0	0	0	0	0	0	0	0	0	0	0	0	0	0	0	0	0	0	0	0	0	0	0	0	0	0	Therian S1	966.84	0
10321	IL2RG	0	0	0	0	0	0	0	0	0	0	0	0	0	0	0	0	0	0	0	0	0	0	0	0	0	0	0	Therian S1	966.84	0
10322	MED12	0	0	0	0	0	0	0	0	0	0	0	0	0	0	0	0	0	0	0	0	0	0	0	0	0	0	0	Therian S1	966.84	0
10323	NLGN3	0	0	0	0	0	0	0	0	0	0	0	0	0	0	0	0	0	0	0	0	0	0	0	0	0	0	0	Therian S1	966.84	0
10324	GJB1	0	0	0	0	0	0	0	0	0	0	0	0	0	0	0	0	0	0	0	0	0	0	0	0	0	0	0	Therian S1	966.84	0
10325	ZMYM3	0	0	0	0	0	0	0	0	0	0	0	0	0	0	0	0	0	0	0	0	0	0	0	0	0	0	0	Therian S1	966.84	0
10326	NONO	0	0	0	0	0	0	0	0	0	0	0	0	0	0	0	0	0	0	0	0	0	0	0	0	0	0	0	Therian S1	966.84	0
10327	ITGB1BP2	0	0	0	0	0	0	0	0	0	0	0	0	0	0	0	0	0	0	0	0	0	0	0	0	0	0	0	Therian S1	966.84	0
10328	RHOG	0	0	0	0	0	0	0	0	0	0	0	0	0	0	0	0	0	0	0	0	0	0	0	0	0	0	0	Therian S1	966.84	0
10329	TAF1	0	0	0	0	0	0	0	0	0	0	0	0	0	0	0	0	0	0	0	0	0	0	0	0	0	0	0	Therian S1	966.84	0
10330	OGT	0	0	0	0	0	0	0	0	0	0	0	0	0	0	0	0	0	0	0	0	0	0	0	0	0	0	0	Therian S1	966.84	0
10331	GCNA	0	0	0	0	0	0	0	0	0	0	0	0	0	0	0	0	0	0	0	0	0	0	0	0	0	0	0	Therian S1	966.84	0
10332	CXCR3	0	0	0	0	0	0	0	0	0	0	0	0	0	0	0	0	0	0	0	0	0	0	0	0	0	0	0	Therian S1	966.84	0
10333	CXorf49	0	0	0	0	0	0	0	0	0	0	0	0	0	0	0	0	0	0	0	0	0	0	0	0	0	0	0	Therian S1	966.84	0
10334	NHSL2	0	0	0	0	0	0	0	0	0	0	0	0	0	0	0	0	0	0	0	0	0	0	0	0	0	0	0	Therian S1	966.84	0
10335	PIN4	0	0	0	0	0	0	0	0	0	0	0	0	0	0	0	0	0	0	0	0	0	0	0	0	0	0	0	Therian S1	966.84	0
10336	ERCC6L	0	0	0	0	0	0	0	0	0	0	0	0	0	0	0	0	0	0	0	0	0	0	0	0	0	0	0	Therian S1	966.84	0
10337	RPS4X	6.7	6.7	1.9	8.6	20.84	29.44	13.76	43.2	46.8	0	0	0	6	0	55	22	0	1	0	0	0	18	63	0	0	0	342.94	Therian S1	966.84	0.354702
10338	CITED1	0	0	0	0	0	0	0	0	0	0	0	0	0	0	0	0	0	0	0	0	0	0	0	0	0	0	0	Therian S1	966.84	0
10339	HDAC8	0	0	0	0	0	0	0	0	0	0	0	0	0	0	0	0	0	0	0	0	0	0	0	0	0	0	0	Therian S1	966.84	0
10340	PHKA1	0	0	0	0	0	0	0	0	0	0	0	0	0	0	0	0	0	0	0	0	0	0	0	0	0	0	0	Therian S1	966.84	0
10341	PABPC1L2A	0	0	0	0	0	0	0	0	0	0	0	0	0	0	0	0	0	0	0	0	0	0	0	0	0	0	0	Therian S1	966.84	0
10342	VEGFRKDRL	0	0	0	0	0	0	0	0	0	0	0	0	0	0	0	0	0	0	0	0	0	0	0	0	0	0	0	Therian S1	966.84	0
10343	CDX4	0	0	0	0	0	0	0	0	0	0	0	0	0	0	0	0	0	0	0	0	0	0	0	0	0	0	0	Therian S1	966.84	0
10344	CHIC1	0	0	0	0	0	0	0	0	0	0	0	0	0	0	0	0	0	0	0	0	0	0	0	0	0	0	0	Therian S1	966.84	0
10345	BMP2KL	0	0	0	0	0	0	0	0	0	0	0	0	0	0	0	0	0	0	0	0	0	0	0	0	0	0	0	Therian S1	966.84	0
10346	SLC16A2	0	0	0	0	0	0	0	0	0	0	0	0	0	0	0	0	0	0	0	0	0	0	0	0	0	0	0	Therian S1	966.84	0
10347	RLIM	0	0	0	0	0	0	0	0	0	0	0	0	0	0	0	0	0	0	0	0	0	0	0	0	0	0	0	Therian S1	966.84	0
10348	NEXMIF	0	0	0	0	0	0	0	0	0	0	0	0	0	0	0	0	0	0	0	0	0	0	0	0	0	0	0	Therian S1	966.84	0
10349	ABCB7	0	0	0	0	0	0	0	0	0	0	0	0	0	0	0	0	0	0	0	0	0	0	0	0	0	0	0	Therian S1	966.84	0
10350	UPRT	0	0	0	0	0	0	0	0	0	0	0	0	0	0	0	0	0	0	0	0	0	0	0	0	0	0	0	Therian S1	966.84	0
10351	ZDHHC15	0	0	0	0	0	0	0	0	0	0	0	0	0	0	0	0	0	0	0	0	0	0	0	0	0	0	0	Therian S1	966.84	0
10352	MAGEE1	0	0	0	0	0	0	0	0	0	0	0	0	0	0	0	0	0	0	0	0	0	0	0	0	0	0	0	Therian S1	966.84	0
10353	FGF16	0	0	0	0	0	0	0	0	0	0	0	0	0	0	0	0	0	0	0	0	0	0	0	0	0	0	0	Therian S1	966.84	0
10354	ATRX	0	0	0	0	0	0	0	0	0	0	0	0	0	0	0	0	0	0	0	0	0	0	0	82	82	77	241	Therian S1	966.84	0.249266
10355	MAGT1	0	0	0	0	0	0	0	0	0	0	0	0	0	0	0	0	0	0	0	0	0	0	0	0	0	0	0	Therian S1	966.84	0
10356	COX7B	0	0	0	0	0	0	0	0	0	0	0	0	0	0	0	0	0	0	0	0	0	0	0	0	0	0	0	Therian S1	966.84	0
10357	ATP7A	0	0	0	0	0	0	0	0	0	0	0	0	0	0	0	0	0	0	0	0	0	0	0	0	0	0	0	Therian S1	966.84	0
10358	PGK1	0	0	0	0	0	0	0	0	0	0	0	0	0	0	0	0	0	0	0	0	0	0	0	0	0	0	0	Therian S1	966.84	0
10359	TAF9B	0	0	0	0	0	0	0	0	0	0	0	0	0	0	0	0	0	0	0	0	0	0	0	0	0	0	0	Therian S1	966.84	0
10360	Fndc3c1	0	0	0	0	0	0	0	0	0	0	0	0	0	0	0	0	0	0	0	0	0	0	0	0	0	0	0	Therian S1	966.84	0
10361	CYSLTR1	0	0	0	0	0	0	0	0	0	0	0	0	0	0	0	0	0	0	0	0	0	0	0	0	0	0	0	Therian S1	966.84	0
10362	Gm5127	0	0	0	0	0	0	0	0	0	0	0	0	0	0	0	0	0	0	0	0	0	0	0	0	0	0	0	Therian S1	966.84	0
10363	LPAR4	0	0	0	0	0	0	0	0	0	0	0	0	0	0	0	0	0	0	0	0	0	0	0	0	0	0	0	Therian S1	966.84	0
10364	P2RY10	0	0	0	0	0	0	0	0	0	0	0	0	0	0	0	0	0	0	0	0	0	0	0	0	0	0	0	Therian S1	966.84	0
10365	GPR174	0	0	0	0	0	0	0	0	0	0	0	0	0	0	0	0	0	0	0	0	0	0	0	0	0	0	0	Therian S1	966.84	0
10366	ITM2A	0	0	0	0	0	0	0	0	0	0	0	0	0	0	0	0	0	0	0	0	0	0	0	0	0	0	0	Therian S1	966.84	0
10367	TBX22	0	0	0	0	0	0	0	0	0	0	0	0	0	0	0	0	0	0	0	0	0	0	0	0	0	0	0	Therian S1	966.84	0
10368	CHMP1B	0	0	0	0	0	0	0	0	0	0	0	0	0	0	0	0	0	0	0	0	0	0	0	0	0	0	0	Therian S1	966.84	0
10369	TENT5D	0	0	0	0	0	0	0	0	0	0	0	0	0	0	0	0	0	0	0	0	0	0	0	0	0	0	0	Therian S1	966.84	0
10370	BRWD3	0	0	0	0	0	0	0	0	0	0	0	0	0	0	0	0	0	0	0	0	0	0	0	0	0	0	0	Therian S1	966.84	0
10371	HMGN5	0	0	0	0	0	0	0	0	0	0	0	0	0	0	0	0	0	0	0	0	0	0	0	0	0	0	0	Therian S1	966.84	0
10372	SH3BGRL	0	0	0	0	0	0	0	0	0	0	0	0	0	0	0	0	0	0	0	0	0	0	0	0	0	0	0	Therian S1	966.84	0
10373	Gm6377	0	0	0	0	0	0	0	0	0	0	0	0	0	0	0	0	0	0	0	0	0	0	0	0	0	0	0	Therian S1	966.84	0
10374	LOC422276	0	0	0	0	0	0	0	0	0	0	0	0	0	0	0	0	0	0	0	0	0	0	0	0	0	0	0	Therian S1	966.84	0
10375	LOC101750517	0	0	0	0	0	0	0	0	0	0	0	0	0	0	0	0	0	0	0	0	0	0	0	0	0	0	0	Therian S1	966.84	0
10376	POU3F4	0	0	0	0	0	0	0	0	0	0	0	0	0	0	0	0	0	0	0	0	0	0	0	0	0	0	0	Therian S1	966.84	0
10377	CYLC1	0	0	0	0	0	0	0	0	0	0	0	0	0	0	0	0	0	0	0	0	0	0	0	0	0	0	0	Therian S1	966.84	0
10378	RPS6KA6	0	0	0	0	0	0	0	0	0	0	0	0	0	0	0	0	0	0	0	0	0	0	0	0	0	0	0	Therian S1	966.84	0
10379	HDX	0	0	0	0	0	0	0	0	0	0	0	0	0	0	0	0	0	0	0	0	0	0	0	0	0	0	0	Therian S1	966.84	0
10380	LOC101749809	0	0	0	0	0	0	0	0	0	0	0	0	0	0	0	0	0	0	0	0	0	0	0	0	0	0	0	Therian S1	966.84	0
10381	APOOL	0	0	0	0	0	0	0	0	0	0	0	0	0	0	0	0	0	0	0	0	0	0	0	0	0	0	0	Therian S1	966.84	0
10382	SATL1	0	0	0	0	0	0	0	0	0	0	0	0	0	0	0	0	0	0	0	0	0	0	0	0	0	0	0	Therian S1	966.84	0
10383	ZNF711	0	0	0	0	0	0	0	0	0	0	0	0	0	0	0	0	0	0	0	0	0	0	0	0	0	0	0	Therian S1	966.84	0
10384	POF1B	0	0	0	0	0	0	0	0	0	0	0	0	0	0	0	0	0	0	0	0	0	0	0	0	0	0	0	Therian S1	966.84	0
10385	CHM	0	0	0	0	0	0	0	0	0	0	0	0	0	0	0	0	0	0	0	0	0	0	0	0	0	0	0	Therian S1	966.84	0
10386	DACH2	0	0	0	0	0	0	0	0	0	0	0	0	0	0	0	0	0	0	0	0	0	0	0	0	0	0	0	Therian S1	966.84	0
10387	KLHL4	0	0	0	0	0	0	0	0	0	0	0	0	0	0	0	0	0	0	0	0	0	0	0	0	0	0	0	Therian S1	966.84	0
10388	PCDH11X	6.7	0	0	0	0	0	0	0	0	0	0	0	0	0	0	0	0	0	0	0	0	0	0	0	0	0	6.7	Therian S1 & Human PCDH11X X-transposed region	973.54	0.0068821
10389	NAP1L3	0	0	0	0	0	0	0	0	0	0	0	0	0	0	0	0	0	0	0	0	0	0	0	0	0	0	0	Therian S1	966.84	0
10390	DIAPH2	0	0	0	0	0	0	0	0	0	0	0	0	0	0	0	0	0	0	0	0	0	0	0	0	0	0	0	Therian S1	966.84	0
10391	PCDH19	0	0	0	0	0	0	0	0	0	0	0	0	0	0	0	0	0	0	0	0	0	0	0	0	0	0	0	Therian S1	966.84	0
10392	TNMD	0	0	0	0	0	0	0	0	0	0	0	0	0	0	0	0	0	0	0	0	0	0	0	0	0	0	0	Therian S1	966.84	0
10393	TSPAN6	0	0	0	0	0	0	0	0	0	0	0	0	0	0	0	0	0	0	0	0	0	0	0	0	0	0	0	Therian S1	966.84	0
10394	SRPX2	0	0	0	0	0	0	0	0	0	0	0	0	0	0	0	0	0	0	0	0	0	0	0	0	0	0	0	Therian S1	966.84	0
10395	SYTL4	0	0	0	0	0	0	0	0	0	0	0	0	0	0	0	0	0	0	0	0	0	0	0	0	0	0	0	Therian S1	966.84	0
10396	TRMT12	0	0	0	0	0	0	0	0	0	0	0	0	0	0	0	0	0	0	0	0	0	0	0	0	0	0	0	Therian S1	966.84	0
10397	CSTF2	0	0	0	0	0	0	0	0	0	0	0	0	0	0	0	0	0	0	0	0	0	0	0	0	0	0	0	Therian S1	966.84	0
10398	NOX1	0	0	0	0	0	0	0	0	0	0	0	0	0	0	0	0	0	0	0	0	0	0	0	0	0	0	0	Therian S1	966.84	0
10399	XKRX	0	0	0	0	0	0	0	0	0	0	0	0	0	0	0	0	0	0	0	0	0	0	0	0	0	0	0	Therian S1	966.84	0
10400	ARL13A	0	0	0	0	0	0	0	0	0	0	0	0	0	0	0	0	0	0	0	0	0	0	0	0	0	0	0	Therian S1	966.84	0
10401	TRMT2B	0	0	0	0	0	0	0	0	0	0	0	0	0	0	0	0	0	0	0	0	0	0	0	0	0	0	0	Therian S1	966.84	0
10402	TMEM35A	0	0	0	0	0	0	0	0	0	0	0	0	0	0	0	0	0	0	0	0	0	0	0	0	0	0	0	Therian S1	966.84	0
10403	CENPI	0	0	0	0	0	0	0	0	0	0	0	0	0	0	0	0	0	0	0	0	0	0	0	0	0	0	0	Therian S1	966.84	0
10404	DRP2	0	0	0	0	0	0	0	0	0	0	0	0	0	0	0	0	0	0	0	0	0	0	0	0	0	0	0	Therian S1	966.84	0
10405	TAF7L	0	0	0	0	0	0	0	0	0	0	0	0	0	0	0	0	0	0	0	0	0	0	0	0	0	0	0	Therian S1	966.84	0
10406	TIMM8A	0	0	0	0	0	0	0	0	0	0	0	0	0	0	0	0	0	0	0	0	0	0	0	0	0	0	0	Therian S1	966.84	0
10407	BTK	0	0	0	0	0	0	0	0	0	0	0	0	0	0	0	0	0	0	0	0	0	0	0	0	0	0	0	Therian S1	966.84	0
10408	GLA	0	0	0	0	0	0	0	0	0	0	0	0	0	0	0	0	0	0	0	0	0	0	0	0	0	0	0	Therian S1	966.84	0
10409	RPL36A	0	0	0	0	0	0	0	0	0	0	0	0	0	0	0	0	0	0	0	0	0	0	0	0	0	0	0	Therian S1	966.84	0
10410	GLRA4	0	0	0	0	0	0	0	0	0	0	0	0	0	0	0	0	0	0	0	0	0	0	0	0	0	0	0	Therian S1	966.84	0
10411	TMEM31	0	0	0	0	0	0	0	0	0	0	0	0	0	0	0	0	0	0	0	0	0	0	0	0	0	0	0	Therian S1	966.84	0
10412	PLP1	0	0	0	0	0	0	0	0	0	0	0	0	0	0	0	0	0	0	0	0	0	0	0	0	0	0	0	Therian S1	966.84	0
10413	RAB9B	0	0	0	0	0	0	0	0	0	0	0	0	0	0	0	0	0	0	0	0	0	0	0	0	0	0	0	Therian S1	966.84	0
10414	SLC25A53	0	0	0	0	0	0	0	0	0	0	0	0	0	0	0	0	0	0	0	0	0	0	0	0	0	0	0	Therian S1	966.84	0
10415	FAM199X	0	0	0	0	0	0	0	0	0	0	0	0	0	0	0	0	0	0	0	0	0	0	0	0	0	0	0	Therian S1	966.84	0
10416	ESX1	0	0	0	0	0	0	0	0	0	0	0	0	0	0	0	0	0	0	0	0	0	0	0	0	0	0	0	Therian S1	966.84	0
10417	IL1RAPL2	0	0	0	0	0	0	0	0	0	0	0	0	0	0	0	0	0	0	0	0	0	0	0	0	0	0	0	Therian S1	966.84	0
10418	NRK	0	0	0	0	0	0	0	0	0	0	0	0	0	0	0	0	0	0	0	0	0	0	0	0	0	0	0	Therian S1	966.84	0
10419	RADX	0	0	0	0	0	0	0	0	0	0	0	0	0	0	0	0	0	0	0	0	0	0	0	0	0	0	0	Therian S1	966.84	0
10420	RNF128	0	0	0	0	0	0	0	0	0	0	0	0	0	0	0	0	0	0	0	0	0	0	0	0	0	0	0	Therian S1	966.84	0
10421	TBC1D8B	0	0	0	0	0	0	0	0	0	0	0	0	0	0	0	0	0	0	0	0	0	0	0	0	0	0	0	Therian S1	966.84	0
10422	RIPPLY1	0	0	0	0	0	0	0	0	0	0	0	0	0	0	0	0	0	0	0	0	0	0	0	0	0	0	0	Therian S1	966.84	0
10423	CLDN2	0	0	0	0	0	0	0	0	0	0	0	0	0	0	0	0	0	0	0	0	0	0	0	0	0	0	0	Therian S1	966.84	0
10424	MORC4	0	0	0	0	0	0	0	0	0	0	0	0	0	0	0	0	0	0	0	0	0	0	0	0	0	0	0	Therian S1	966.84	0
10425	RBM41	0	0	0	0	0	0	0	0	0	0	0	0	0	0	0	0	0	0	0	0	0	0	0	0	0	0	0	Therian S1	966.84	0
10426	NUP62CL	0	0	0	0	0	0	0	0	0	0	0	0	0	0	0	0	0	0	0	0	0	0	0	0	0	0	0	Therian S1	966.84	0
10427	DNAAF6	0	0	0	0	0	0	0	0	0	0	0	0	0	0	0	0	0	0	0	0	0	0	0	0	0	0	0	Therian S1	966.84	0
10428	FRMPD3	0	0	0	0	0	0	0	0	0	0	0	0	0	0	0	0	0	0	0	0	0	0	0	0	0	0	0	Therian S1	966.84	0
10429	PRPS1	0	0	0	0	0	0	0	0	0	0	0	0	0	0	0	0	0	0	0	0	0	0	0	0	0	0	0	Therian S1	966.84	0
10430	TSC22D3	0	0	0	0	0	0	0	0	0	0	0	0	0	0	0	0	0	0	0	0	0	0	0	0	0	0	0	Therian S1	966.84	0
10431	NCBP2L	0	0	0	0	0	0	0	0	0	0	0	0	0	0	0	0	0	0	0	0	0	0	0	0	0	0	0	Therian S1	966.84	0
10432	MID2	0	0	0	0	0	0	0	0	0	0	0	0	0	0	0	0	0	0	0	0	0	0	0	0	0	0	0	Therian S1	966.84	0
10433	VSIG1	0	0	0	0	0	0	0	0	0	0	0	0	0	0	0	0	0	0	0	0	0	0	0	0	0	0	0	Therian S1	966.84	0
10434	PSMD10	0	0	0	0	0	0	0	0	0	0	0	0	0	0	0	0	0	0	0	0	0	0	0	0	0	0	0	Therian S1	966.84	0
10435	ATG4A	0	0	0	0	0	0	0	0	0	0	0	0	0	0	0	0	0	0	0	0	0	0	0	0	0	0	0	Therian S1	966.84	0
10436	COL4A5	0	0	0	0	0	0	0	0	0	0	0	0	0	0	0	0	0	0	0	0	0	0	0	0	0	0	0	Therian S1	966.84	0
10437	IRS4	0	0	0	0	0	0	0	0	0	0	0	0	0	0	0	0	0	0	0	0	0	0	0	0	0	0	0	Therian S1	966.84	0
10438	GUCY2F	0	0	0	0	0	0	0	0	0	0	0	0	0	0	0	0	0	0	0	0	0	0	0	0	0	0	0	Therian S1	966.84	0
10439	NXT2	0	0	0	0	0	0	0	0	0	0	0	0	0	0	0	0	0	0	0	0	0	0	0	0	0	0	0	Therian S1	966.84	0
10440	KCNE5	0	0	0	0	0	0	0	0	0	0	0	0	0	0	0	0	0	0	0	0	0	0	0	0	0	0	0	Therian S1	966.84	0
10441	ACSL4	0	0	0	0	0	0	0	0	0	0	0	0	0	0	0	0	0	0	0	0	0	0	0	0	0	0	0	Therian S1	966.84	0
10442	TMEM164	0	0	0	0	0	0	0	0	0	0	0	0	0	0	0	0	0	0	0	0	0	0	0	0	0	0	0	Therian S1	966.84	0
10443	AMMECR1	0	0	0	0	0	0	0	0	0	0	0	0	0	0	0	0	0	0	0	0	0	0	0	0	0	0	0	Therian S1	966.84	0
10444	CHRDL1	0	0	0	0	0	0	0	0	0	0	0	0	0	0	0	0	0	0	0	0	0	0	0	0	0	0	0	Therian S1	966.84	0
10445	PAK3	0	0	0	0	0	0	0	0	0	0	0	0	0	0	0	0	0	0	0	0	0	0	0	0	0	0	0	Therian S1	966.84	0
10446	CAPN6	0	0	0	0	0	0	0	0	0	0	0	0	0	0	0	0	0	0	0	0	0	0	0	0	0	0	0	Therian S1	966.84	0
10447	DCX	0	0	0	0	0	0	0	0	0	0	0	0	0	0	0	0	0	0	0	0	0	0	0	0	0	0	0	Therian S1	966.84	0
10448	KCTD12	0	0	0	0	0	0	0	0	0	0	0	0	0	0	0	0	0	0	0	0	0	0	0	0	0	0	0	Therian S1	966.84	0
10449	ALG13	0	0	0	0	0	0	0	0	0	0	0	0	0	0	0	0	0	0	0	0	0	0	0	0	0	0	0	Therian S1	966.84	0
10450	TRPC5	0	0	0	0	0	0	0	0	0	0	0	0	0	0	0	0	0	0	0	0	0	0	0	0	0	0	0	Therian S1	966.84	0
10451	LHFPL1	0	0	0	0	0	0	0	0	0	0	0	0	0	0	0	0	0	0	0	0	0	0	0	0	0	0	0	Therian S1	966.84	0
10452	AMOT	0	0	0	0	0	0	0	0	0	0	0	0	0	0	0	0	0	0	0	0	0	0	0	0	0	0	0	Therian S1	966.84	0
10453	HTR2C	0	0	0	0	0	0	0	0	0	0	0	0	0	0	0	0	0	0	0	0	0	0	0	0	0	0	0	Therian S1	966.84	0
10454	IL13RA2	0	0	0	0	0	0	0	0	0	0	0	0	0	0	0	0	0	0	0	0	0	0	0	0	0	0	0	Therian S1	966.84	0
10455	LRCH2	0	0	0	0	0	0	0	0	0	0	0	0	0	0	0	0	0	0	0	0	0	0	0	0	0	0	0	Therian S1	966.84	0
10456	PLS3	0	0	0	0	0	0	0	0	0	0	0	0	0	0	0	0	0	0	0	0	0	0	0	0	0	0	0	Therian S1	966.84	0
10457	AGTR2	0	0	0	0	0	0	0	0	0	0	0	0	0	0	0	0	0	0	0	0	0	0	0	0	0	0	0	Therian S1	966.84	0
10458	SLC6A14	0	0	0	0	0	0	0	0	0	0	0	0	0	0	0	0	0	0	0	0	0	0	0	0	0	0	0	Therian S1	966.84	0
10459	KLHL13	0	0	0	0	0	0	0	0	0	0	0	0	0	0	0	0	0	0	0	0	0	0	0	0	0	0	0	Therian S1	966.84	0
10460	WDR44	0	0	0	0	0	0	0	0	0	0	0	0	0	0	0	0	0	0	0	0	0	0	0	0	0	0	0	Therian S1	966.84	0
10461	DOCK11	0	0	0	0	0	0	0	0	0	0	0	0	0	0	0	0	0	0	0	0	0	0	0	0	0	0	0	Therian S1	966.84	0
10462	IL13RA1	0	0	0	0	0	0	0	0	0	0	0	0	0	0	0	0	0	0	0	0	0	0	0	0	0	0	0	Therian S1	966.84	0
10463	LONRF3	0	0	0	0	0	0	0	0	0	0	0	0	0	0	0	0	0	0	0	0	0	0	0	0	0	0	0	Therian S1	966.84	0
10464	PGRMC1	0	0	0	0	0	0	0	0	0	0	0	0	0	0	0	0	0	0	0	0	0	0	0	0	0	0	0	Therian S1	966.84	0
10465	AKAP17BP	0	0	0	0	0	0	0	0	0	0	0	0	0	0	0	0	0	0	0	0	0	0	0	0	0	0	0	Therian S1	966.84	0
10466	SLC25A43	0	0	0	0	0	0	0	0	0	0	0	0	0	0	0	0	0	0	0	0	0	0	0	0	0	0	0	Therian S1	966.84	0
10467	SLC25A5	0	0	0	0	0	0	0	0	0	0	0	0	0	0	0	0	0	0	0	0	0	0	0	0	0	0	0	Therian S1	966.84	0
10468	CXorf56	0	0	0	0	0	0	0	0	0	0	0	0	0	0	0	0	0	0	0	0	0	0	0	0	0	0	0	Therian S1	966.84	0
10469	UBE2A	0	0	0	0	0	0	0	0	0	0	0	0	0	0	0	0	0	0	0	0	0	0	0	0	0	0	0	Therian S1	966.84	0
10470	NKRF	0	0	0	0	0	0	0	0	0	0	0	0	0	0	0	0	0	0	0	0	0	0	0	0	0	0	0	Therian S1	966.84	0
10471	SEPTIN6	0	0	0	0	0	0	0	0	0	0	0	0	0	0	0	0	0	0	0	0	0	0	0	0	0	0	0	Therian S1	966.84	0
10472	SOWAHD	0	0	0	0	0	0	0	0	0	0	0	0	0	0	0	0	0	0	0	0	0	0	0	0	0	0	0	Therian S1	966.84	0
10473	RPL39	0	0	0	0	0	0	0	0	0	0	0	0	0	0	0	0	0	0	0	0	0	0	0	0	0	0	0	Therian S1	966.84	0
10474	UPF3B	0	0	0	0	0	0	0	0	0	0	0	0	0	0	0	0	0	0	0	0	0	0	0	0	0	0	0	Therian S1	966.84	0
10475	RNF113A	0	0	0	0	0	0	0	0	0	0	0	0	0	0	0	0	0	0	0	0	0	0	0	0	0	0	0	Therian S1	966.84	0
10476	NDUFA1	0	0	0	0	0	0	0	0	0	0	0	0	0	0	0	0	0	0	0	0	0	0	0	0	0	0	0	Therian S1	966.84	0
10477	AKAP14	0	0	0	0	0	0	0	0	0	0	0	0	0	0	0	0	0	0	0	0	0	0	0	0	0	0	0	Therian S1	966.84	0
10478	NKAP	0	0	0	0	0	0	0	0	0	0	0	0	0	0	0	0	0	0	0	0	0	0	0	0	0	0	0	Therian S1	966.84	0
10479	ZBTB33	0	0	0	0	0	0	0	0	0	0	0	0	0	0	0	0	0	0	0	0	0	0	0	0	0	0	0	Therian S1	966.84	0
10480	TMEM255A	0	0	0	0	0	0	0	0	0	0	0	0	0	0	0	0	0	0	0	0	0	0	0	0	0	0	0	Therian S1	966.84	0
10481	ATP1B4	0	0	0	0	0	0	0	0	0	0	0	0	0	0	0	0	0	0	0	0	0	0	0	0	0	0	0	Therian S1	966.84	0
10482	LAMP2	0	0	0	0	0	0	0	0	0	0	0	0	0	0	0	0	0	0	0	0	0	0	0	0	0	0	0	Therian S1	966.84	0
10483	CUL4B	0	0	0	0	0	0	0	0	0	0	0	0	0	55	55	22	77	1	0	62	16	18	63	0	0	0	369	Therian S1	966.84	0.381656
10484	MCTS1	0	0	0	0	0	0	0	0	0	0	0	0	0	0	0	0	0	0	0	0	0	0	0	0	0	0	0	Therian S1	966.84	0
10485	C1GALT1C1	0	0	0	0	0	0	0	0	0	0	0	0	0	0	0	0	0	0	0	0	0	0	0	0	0	0	0	Therian S1	966.84	0
10486	GRIA3	0	0	0	0	0	0	0	0	0	0	0	0	0	0	0	0	0	0	0	0	0	0	0	0	0	0	0	Therian S1	966.84	0
10487	THOC2	0	0	0	0	0	0	0	43.2	0	0	0	0	0	0	0	0	0	0	0	0	0	0	0	82	82	77	284.2	Therian S1 & Marmoset THOC2 X-transposed region	1010.04	0.281375
10488	XIAP	0	0	0	0	0	0	0	0	0	0	0	0	0	0	0	0	0	0	0	0	0	0	0	0	0	0	0	Therian S1	966.84	0
10489	STAG2	0	0	0	0	0	0	0	0	0	0	0	0	0	0	0	0	0	0	0	0	0	0	0	0	0	0	0	Therian S1	966.84	0
10490	SH2D1A	0	0	0	0	0	0	0	0	0	0	0	0	0	0	0	0	0	0	0	0	0	0	0	0	0	0	0	Therian S1	966.84	0
10491	TENM1	0	0	0	0	0	0	0	0	0	0	0	0	0	0	0	0	0	0	0	0	0	0	0	0	0	0	0	Therian S1	966.84	0
10492	SMARCA1	0	0	0	0	0	0	0	0	0	0	0	0	0	0	0	0	0	0	0	0	0	0	0	0	0	0	0	Therian S1	966.84	0
10493	OCRL	0	0	0	0	0	0	0	0	0	0	0	0	0	0	0	0	0	0	0	0	0	0	0	0	0	0	0	Therian S1	966.84	0
10494	APLN	0	0	0	0	0	0	0	0	0	0	0	0	0	0	0	0	0	0	0	0	0	0	0	0	0	0	0	Therian S1	966.84	0
10495	XPNPEP2	0	0	0	0	0	0	0	0	0	0	0	0	0	0	0	0	0	0	0	0	0	0	0	0	0	0	0	Therian S1	966.84	0
10496	SASH3	0	0	0	0	0	0	0	0	0	0	0	0	0	0	0	0	0	0	0	0	0	0	0	0	0	0	0	Therian S1	966.84	0
10497	ZDHHC9	0	0	0	0	0	0	0	0	0	0	0	0	0	0	0	0	0	0	0	0	0	0	0	0	0	0	0	Therian S1	966.84	0
10498	UTP14A	0	0	0	0	0	0	0	0	0	0	0	0	0	0	0	0	0	0	0	0	0	0	0	0	0	0	0	Therian S1	966.84	0
10499	BCORL1	0	0	0	0	0	0	0	0	0	0	0	0	0	0	0	0	0	0	0	0	0	0	0	0	0	0	0	Therian S1	966.84	0
10500	ELF4	0	0	0	0	0	0	0	0	0	0	0	0	0	0	0	0	0	0	0	0	0	0	0	0	0	0	0	Therian S1	966.84	0
10501	AIFM1	0	0	0	0	0	0	0	0	0	0	0	0	0	0	0	0	0	0	0	0	0	0	0	0	0	0	0	Therian S1	966.84	0
10502	RAB33A	0	0	0	0	0	0	0	0	0	0	0	0	0	0	0	0	0	0	0	0	0	0	0	0	0	0	0	Therian S1	966.84	0
10503	SLC25A14	0	0	0	0	0	0	0	0	0	0	0	0	0	0	0	0	0	0	0	0	0	0	0	0	0	0	0	Therian S1	966.84	0
10504	GPR119	0	0	0	0	0	0	0	0	0	0	0	0	0	0	0	0	0	0	0	0	0	0	0	0	0	0	0	Therian S1	966.84	0
10505	RBMX2	0	0	0	0	0	0	0	0	0	0	0	0	0	0	0	0	0	0	0	0	0	0	0	0	0	0	0	Therian S1	966.84	0
10506	ENOX2	0	0	0	0	0	0	0	0	0	0	0	0	0	0	0	0	0	0	0	0	0	0	0	0	0	0	0	Therian S1	966.84	0
10507	ARHGAP36	0	0	0	0	0	0	0	0	0	0	0	0	0	0	0	0	0	0	0	0	0	0	0	0	0	0	0	Therian S1	966.84	0
10508	OR13H1	0	0	0	0	0	0	0	0	0	0	0	0	0	0	0	0	0	0	0	0	0	0	0	0	0	0	0	Therian S1	966.84	0
10509	STK26	0	0	0	0	0	0	0	0	0	0	0	0	0	0	0	0	0	0	0	0	0	0	0	0	0	0	0	Therian S1	966.84	0
10510	FRMD7	0	0	0	0	0	0	0	0	0	0	0	0	0	0	0	0	0	0	0	0	0	0	0	0	0	0	0	Therian S1	966.84	0
10511	RAP2C	0	0	0	0	0	0	0	0	0	0	0	0	0	0	0	0	0	0	0	0	0	0	0	0	0	0	0	Therian S1	966.84	0
10512	MBNL3	0	0	0	0	0	0	0	0	0	0	0	0	0	0	0	0	0	0	0	0	0	0	0	0	0	0	0	Therian S1	966.84	0
10513	HS6ST2	0	0	0	0	0	0	0	0	0	0	0	0	0	0	0	0	0	0	0	0	0	0	0	0	0	0	0	Therian S1	966.84	0
10514	GPC4	0	0	0	0	0	0	0	0	0	0	0	0	0	0	0	0	0	0	0	0	0	0	0	0	0	0	0	Therian S1	966.84	0
10515	GPC3	0	0	0	0	0	0	0	0	0	0	0	0	0	0	0	0	0	0	0	0	0	0	0	0	0	0	0	Therian S1	966.84	0
10516	CCDC160	0	0	0	0	0	0	0	0	0	0	0	0	0	0	0	0	0	0	0	0	0	0	0	0	0	0	0	Therian S1	966.84	0
10517	PHF6	0	0	0	0	0	0	0	0	0	0	0	0	0	0	0	0	0	0	0	0	0	0	0	82	82	77	241	Therian S1	966.84	0.249266
10518	HPRT1	0	0	0	0	0	0	0	0	0	0	0	0	0	0	0	0	0	0	0	0	0	0	0	0	0	0	0	Therian S1	966.84	0
10519	PABIR2	0	0	0	0	0	0	0	0	0	0	0	0	0	0	0	0	0	0	0	0	0	0	0	82	82	77	241	Therian S1	966.84	0.249266
10520	PABIR3	0	0	0	0	0	0	0	0	0	0	0	0	0	0	0	0	0	0	0	0	0	0	0	0	0	0	0	Therian S1	966.84	0
10521	MOSPD1	0	0	0	0	0	0	0	0	0	0	0	0	0	0	0	0	0	0	0	0	0	0	0	0	0	0	0	Therian S1	966.84	0
10522	INTS6L	0	0	0	0	0	0	0	0	0	0	0	0	0	0	0	0	0	0	0	0	0	0	0	0	0	0	0	Therian S1	966.84	0
10523	SAGE1	0	0	0	0	0	0	0	0	0	0	0	0	0	0	0	0	0	0	0	0	0	0	0	0	0	0	0	Therian S1	966.84	0
10524	MMGT1	0	0	0	0	0	0	0	0	0	0	0	0	0	0	0	0	0	0	0	0	0	0	0	0	0	0	0	Therian S1	966.84	0
10525	SLC9A6	0	0	0	0	0	0	0	0	0	0	0	0	0	0	0	0	0	0	0	0	0	0	0	0	0	0	0	Therian S1	966.84	0
10526	FHL1	0	0	0	0	0	0	0	0	0	0	0	0	0	0	0	0	0	0	0	0	0	0	0	0	0	0	0	Therian S1	966.84	0
10527	MAP7D3	0	0	0	0	0	0	0	0	0	0	0	0	0	0	0	0	0	0	0	0	0	0	0	0	0	0	0	Therian S1	966.84	0
10528	ADGRG4	0	0	0	0	0	0	0	0	0	0	0	0	0	0	0	0	0	0	0	0	0	0	0	0	0	0	0	Therian S1	966.84	0
10529	BRS3	0	0	0	0	0	0	0	0	0	0	0	0	0	0	0	0	0	0	0	0	0	0	0	0	0	0	0	Therian S1	966.84	0
10530	HTATSF1	0	0	0	0	0	0	0	0	0	0	0	0	0	0	0	0	0	0	0	0	0	0	0	0	0	0	0	Therian S1	966.84	0
10531	VGLL1	0	0	0	0	0	0	0	0	0	0	0	0	0	0	0	0	0	0	0	0	0	0	0	0	0	0	0	Therian S1	966.84	0
10532	CD40LG	0	0	0	0	0	0	0	0	0	0	0	0	0	0	0	0	0	0	0	0	0	0	0	0	0	0	0	Therian S1	966.84	0
10533	ARHGEF6	0	0	0	0	0	0	0	0	0	0	0	0	0	0	0	0	0	0	0	0	0	0	0	0	0	0	0	Therian S1	966.84	0
10534	RBMX	6.7	6.7	1.9	8.6	20.84	29.44	13.76	43.2	46.8	20.9	20.9	69.1	6	55	0	22	77	1	62	62	16	18	63	82	82	77	911.84	Therian S1	966.84	0.943114
10535	Gm364	0	0	0	0	0	0	0	0	0	0	0	0	0	0	0	0	0	0	0	0	0	0	0	0	0	0	0	Therian S1	966.84	0
10536	GPR101	0	0	0	0	0	0	0	0	0	0	0	0	0	0	0	0	0	0	0	0	0	0	0	0	0	0	0	Therian S1	966.84	0
10537	ZIC3	0	0	0	0	0	0	0	0	0	0	0	0	0	0	0	0	0	0	0	0	0	0	0	0	0	0	0	Therian S1	966.84	0
10538	FGF13	0	0	0	0	0	0	0	0	0	0	0	0	0	0	0	0	0	0	0	0	0	0	0	0	0	0	0	Therian S1	966.84	0
10539	F9	0	0	0	0	0	0	0	0	0	0	0	0	0	0	0	0	0	0	0	0	0	0	0	0	0	0	0	Therian S1	966.84	0
10540	MCF2	0	0	0	0	0	0	0	0	0	0	0	0	0	0	0	0	0	0	0	0	0	0	0	0	0	0	0	Therian S1	966.84	0
10541	ATP11C	0	0	0	0	0	0	0	0	0	0	0	0	0	0	0	0	0	0	0	0	0	0	0	0	0	0	0	Therian S1	966.84	0
10542	SOX3	6.7	6.7	1.9	8.6	20.84	29.44	13.76	43.2	46.8	20.9	20.9	69.1	6	55	55	22	77	1	62	62	16	18	63	82	82	77	966.84	Therian S1	966.84	1
10543	SLITRK4	0	0	0	0	0	0	0	0	0	0	0	0	0	0	0	0	0	0	0	0	0	0	0	0	0	0	0	Therian S1	966.84	0
10544	SLITRK2	0	0	0	0	0	0	0	0	0	0	0	0	0	0	0	0	0	0	0	0	0	0	0	0	0	0	0	Therian S1	966.84	0
10545	FMR1	0	0	0	0	0	0	0	0	0	0	0	0	0	0	0	0	0	0	0	0	0	0	0	0	0	0	0	Therian S1	966.84	0
10546	FMR1NB	0	0	0	0	0	0	0	0	0	0	0	0	0	0	0	0	0	0	0	0	0	0	0	0	0	0	0	Therian S1	966.84	0
10547	AFF2	0	0	0	0	0	0	0	0	0	0	0	0	0	0	0	0	0	0	0	0	0	0	0	0	0	0	0	Therian S1	966.84	0
10548	IDS	0	0	0	0	0	0	0	0	0	0	0	0	0	0	0	0	0	0	0	0	0	0	0	0	0	0	0	Therian S1	966.84	0
10549	EOLA1	0	0	0	0	0	0	0	0	0	0	0	0	0	0	0	0	0	0	0	0	0	0	0	0	0	0	0	Therian S1	966.84	0
10550	HSFX2	0	0	0	0	0	0	0	0	0	0	0	0	0	0	0	0	0	0	0	0	0	0	0	0	0	0	0	Therian S1	966.84	0
10551	TMEM185A	0	0	0	0	0	0	0	0	0	0	0	0	0	0	0	0	0	0	0	0	0	0	0	0	0	0	0	Therian S1	966.84	0
10552	HSFX1	6.7	0	1.9	8.6	20.84	29.44	13.76	0	46.8	0	0	0	6	55	55	22	77	1	62	62	16	18	63	82	82	77	806.04	Therian S1	966.84	0.833685
10553	EOLA2	0	0	0	0	0	0	0	0	0	0	0	0	0	0	0	0	0	0	0	0	0	0	0	0	0	0	0	Therian S1	966.84	0
10554	MAMLD1	0	0	0	0	0	0	0	0	0	0	0	0	0	0	0	0	0	0	0	0	0	0	0	0	0	0	0	Therian S1	966.84	0
10555	MTM1	0	0	0	0	0	0	0	0	0	0	0	0	0	0	0	0	0	0	0	0	0	0	0	0	0	0	0	Therian S1	966.84	0
10556	MTMR1	0	0	0	0	0	0	0	0	0	0	0	0	0	0	0	0	0	0	0	0	0	0	0	0	0	0	0	Therian S1	966.84	0
10557	CD99L2	0	0	0	0	0	0	0	0	0	0	0	0	0	0	0	0	0	0	0	0	0	0	0	0	0	0	0	Therian S1	966.84	0
10558	HMGB3	0	0	0	0	0	0	0	0	0	0	0	0	0	0	0	0	0	0	0	0	0	0	0	82	82	0	164	Eutherian S2/S3 & Metatherian S2	826.84	0.198346
10559	GPR50	0	0	0	0	0	0	0	0	0	0	0	0	0	0	0	0	0	0	0	0	0	0	0	0	0	0	0	Eutherian S2/S3 & Metatherian S2	826.84	0
10560	VMA21	0	0	0	0	0	0	0	0	0	0	0	0	0	0	0	0	0	0	0	0	0	0	0	0	0	0	0	Eutherian S2/S3 & Metatherian S2	826.84	0
10561	PASD1	0	0	0	0	0	0	0	0	0	0	0	0	0	0	0	0	0	0	0	0	0	0	0	0	0	0	0	Eutherian S2/S3 & Metatherian S2	826.84	0
10562	PRRG3	0	0	0	0	0	0	0	0	0	0	0	0	0	0	0	0	0	0	0	0	0	0	0	0	0	0	0	Eutherian S2/S3 & Metatherian S2	826.84	0
10563	FATE1	0	0	0	0	0	0	0	0	0	0	0	0	0	0	0	0	0	0	0	0	0	0	0	0	0	0	0	Eutherian S2/S3 & Metatherian S2	826.84	0
10564	CNGA2	0	0	0	0	0	0	0	0	0	0	0	0	0	0	0	0	0	0	0	0	0	0	0	0	0	0	0	Eutherian S2/S3 & Metatherian S2	826.84	0
10565	GABRE	0	0	0	0	0	0	0	0	0	0	0	0	0	0	0	0	0	0	0	0	0	0	0	0	0	0	0	Eutherian S2/S3 & Metatherian S2	826.84	0
10566	GABRA3	0	0	0	0	0	0	0	0	0	0	0	0	0	0	0	0	0	0	0	0	0	0	0	0	0	0	0	Eutherian S2/S3 & Metatherian S2	826.84	0
10567	GABRQ	0	0	0	0	0	0	0	0	0	0	0	0	0	0	0	0	0	0	0	0	0	0	0	0	0	0	0	Eutherian S2/S3 & Metatherian S2	826.84	0
10568	CETN2	0	0	0	0	0	0	0	0	0	0	0	0	0	0	0	0	0	0	0	0	0	0	0	0	0	0	0	Eutherian S2/S3 & Metatherian S2	826.84	0
10569	NSDHL	0	0	0	0	0	0	0	0	0	0	0	0	0	0	0	0	0	0	0	0	0	0	0	0	0	0	0	Eutherian S2/S3 & Metatherian S2	826.84	0
10570	ZNF185	0	0	0	0	0	0	0	0	0	0	0	0	0	0	0	0	0	0	0	0	0	0	0	0	0	0	0	Eutherian S2/S3 & Metatherian S2	826.84	0
10571	PNMA5	0	0	0	0	0	0	0	0	0	0	0	0	0	0	0	0	0	0	0	0	0	0	0	0	0	0	0	Eutherian S2/S3 & Metatherian S2	826.84	0
10572	PNMA3	0	0	0	0	0	0	0	0	0	0	0	0	0	0	0	0	0	0	0	0	0	0	0	0	0	0	0	Eutherian S2/S3 & Metatherian S2	826.84	0
10573	PWWP4	0	0	0	0	0	0	0	0	0	0	0	0	0	0	0	0	0	0	0	0	0	0	0	0	0	0	0	Eutherian S2/S3 & Metatherian S2	826.84	0
10574	MAGEA1	0	0	0	0	0	0	0	0	0	0	0	0	0	0	0	0	0	0	0	0	0	0	0	0	0	0	0	Eutherian S2/S3 & Metatherian S2	826.84	0
10575	ZNF275	0	0	0	0	0	0	0	0	0	0	0	0	0	0	0	0	0	0	0	0	0	0	0	0	0	0	0	Eutherian S2/S3 & Metatherian S2	826.84	0
10576	TREX2	0	0	0	0	0	0	0	0	0	0	0	0	0	0	0	0	0	0	0	0	0	0	0	0	0	0	0	Eutherian S2/S3 & Metatherian S2	826.84	0
10577	HAUS7	0	0	0	0	0	0	0	0	0	0	0	0	0	0	0	0	0	0	0	0	0	0	0	0	0	0	0	Eutherian S2/S3 & Metatherian S2	826.84	0
10578	BGN	0	0	0	0	0	0	0	0	0	0	0	0	0	0	0	0	0	0	0	0	0	0	0	0	0	0	0	Eutherian S2/S3 & Metatherian S2	826.84	0
10579	ATP2B3	0	0	0	0	0	0	0	0	0	0	0	0	0	0	0	0	0	0	0	0	0	0	0	0	0	0	0	Eutherian S2/S3 & Metatherian S2	826.84	0
10580	DUSP9	0	0	0	0	0	0	0	0	0	0	0	0	0	0	0	0	0	0	0	0	0	0	0	0	0	0	0	Eutherian S2/S3 & Metatherian S2	826.84	0
10581	PNCK	0	0	0	0	0	0	0	0	0	0	0	0	0	0	0	0	0	0	0	0	0	0	0	0	0	0	0	Eutherian S2/S3 & Metatherian S2	826.84	0
10582	SLC6A8	0	0	0	0	0	0	0	0	0	0	0	0	0	0	0	0	0	0	0	0	0	0	0	0	0	0	0	Eutherian S2/S3 & Metatherian S2	826.84	0
10583	BCAP31	0	0	0	0	0	0	0	0	0	0	0	0	0	0	0	0	0	0	0	0	0	0	0	0	0	0	0	Eutherian S2/S3 & Metatherian S2	826.84	0
10584	ABCD1	0	0	0	0	0	0	0	0	0	0	0	0	0	0	0	0	0	0	0	0	0	0	0	0	0	0	0	Eutherian S2/S3 & Metatherian S2	826.84	0
10585	PLXNB3	0	0	0	0	0	0	0	0	0	0	0	0	0	0	0	0	0	0	0	0	0	0	0	0	0	0	0	Eutherian S2/S3 & Metatherian S2	826.84	0
10586	SRPK3	0	0	0	0	0	0	0	0	0	0	0	0	0	0	0	0	0	0	0	0	0	0	0	0	0	0	0	Eutherian S2/S3 & Metatherian S2	826.84	0
10587	IDH3G	0	0	0	0	0	0	0	0	0	0	0	0	0	0	0	0	0	0	0	0	0	0	0	0	0	0	0	Eutherian S2/S3 & Metatherian S2	826.84	0
10588	SSR4	0	0	0	0	0	0	0	0	0	0	0	0	0	0	0	0	0	0	0	0	0	0	0	0	0	0	0	Eutherian S2/S3 & Metatherian S2	826.84	0
10589	PDZD4	0	0	0	0	0	0	0	0	0	0	0	0	0	0	0	0	0	0	0	0	0	0	0	0	0	0	0	Eutherian S2/S3 & Metatherian S2	826.84	0
10590	L1CAM	0	0	0	0	0	0	0	0	0	0	0	0	0	0	0	0	0	0	0	0	0	0	0	0	0	0	0	Eutherian S2/S3 & Metatherian S2	826.84	0
10591	AVPR2	0	0	0	0	0	0	0	0	0	0	0	0	0	0	0	0	0	0	0	0	0	0	0	0	0	0	0	Eutherian S2/S3 & Metatherian S2	826.84	0
10592	ARHGAP4	0	0	0	0	0	0	0	0	0	0	0	0	0	0	0	0	0	0	0	0	0	0	0	0	0	0	0	Eutherian S2/S3 & Metatherian S2	826.84	0
10593	NAA10	0	0	0	0	0	0	0	0	0	0	0	0	0	0	0	0	0	0	0	0	0	0	0	0	0	0	0	Eutherian S2/S3 & Metatherian S2	826.84	0
10594	RENBP	0	0	0	0	0	0	0	0	0	0	0	0	0	0	0	0	0	0	0	0	0	0	0	0	0	0	0	Eutherian S2/S3 & Metatherian S2	826.84	0
10595	HCFC1	0	0	0	0	0	0	0	0	0	0	0	0	0	0	0	0	0	0	0	0	0	0	0	82	82	0	164	Eutherian S2/S3 & Metatherian S2	826.84	0.198346
10596	TMEM187	0	0	0	0	0	0	0	0	0	0	0	0	0	0	0	0	0	0	0	0	0	0	0	0	0	0	0	Eutherian S2/S3 & Metatherian S2	826.84	0
10597	IRAK1	0	0	0	0	0	0	0	0	0	0	0	0	0	0	0	0	0	0	0	0	0	0	0	0	0	0	0	Eutherian S2/S3 & Metatherian S2	826.84	0
10598	MECP2	0	0	0	0	0	0	0	0	0	0	0	0	0	0	0	0	0	0	0	0	0	0	0	82	82	0	164	Eutherian S2/S3 & Metatherian S2	826.84	0.198346
10599	OPN1LW	0	0	0	0	0	0	0	0	0	0	0	0	0	0	0	0	0	0	0	0	0	0	0	0	0	0	0	Eutherian S2/S3 & Metatherian S2	826.84	0
10600	TEX28	0	0	0	0	0	0	0	0	0	0	0	0	0	0	0	0	0	0	0	0	0	0	0	0	0	0	0	Eutherian S2/S3 & Metatherian S2	826.84	0
10601	TKTL1	0	0	0	0	0	0	0	0	0	0	0	0	0	0	0	0	0	0	0	0	0	0	0	0	0	0	0	Eutherian S2/S3 & Metatherian S2	826.84	0
10602	FLNA	0	0	0	0	0	0	0	0	0	0	0	0	0	0	0	0	0	0	0	0	0	0	0	0	0	0	0	Eutherian S2/S3 & Metatherian S2	826.84	0
10603	EMD	0	0	0	0	0	0	0	0	0	0	0	0	0	0	0	0	0	0	0	0	0	0	0	0	0	0	0	Eutherian S2/S3 & Metatherian S2	826.84	0
10604	RPL10	0	0	0	0	0	0	0	0	0	0	0	0	0	0	0	0	0	0	0	0	0	0	0	82	82	0	164	Eutherian S2/S3 & Metatherian S2	826.84	0.198346
10605	DNASE1L1	0	0	0	0	0	0	0	0	0	0	0	0	0	0	0	0	0	0	0	0	0	0	0	0	0	0	0	Eutherian S2/S3 & Metatherian S2	826.84	0
10606	TAZ	0	0	0	0	0	0	0	0	0	0	0	0	0	0	0	0	0	0	0	0	0	0	0	0	0	0	0	Eutherian S2/S3 & Metatherian S2	826.84	0
10607	ATP6AP1	0	0	0	0	0	0	0	0	0	0	0	0	0	0	0	0	0	0	0	0	0	0	0	0	0	0	0	Eutherian S2/S3 & Metatherian S2	826.84	0
10608	GDI1	0	0	0	0	0	0	0	0	0	0	0	0	0	0	0	0	0	0	0	0	0	0	0	0	0	0	0	Eutherian S2/S3 & Metatherian S2	826.84	0
10609	FAM50A	0	0	0	0	0	0	0	0	0	0	0	0	0	0	0	0	0	0	0	0	0	0	0	0	0	0	0	Eutherian S2/S3 & Metatherian S2	826.84	0
10610	PLXNA3	0	0	0	0	0	0	0	0	0	0	0	0	0	0	0	0	0	0	0	0	0	0	0	0	0	0	0	Eutherian S2/S3 & Metatherian S2	826.84	0
10611	UBL4A	0	0	0	0	0	0	0	0	0	0	0	0	0	0	0	0	0	0	0	0	0	0	0	0	0	0	0	Eutherian S2/S3 & Metatherian S2	826.84	0
10612	SLC10A3	0	0	0	0	0	0	0	0	0	0	0	0	0	0	0	0	0	0	0	0	0	0	0	0	0	0	0	Eutherian S2/S3 & Metatherian S2	826.84	0
10613	FAM3A	0	0	0	0	0	0	0	0	0	0	0	0	0	0	0	0	0	0	0	0	0	0	0	0	0	0	0	Eutherian S2/S3 & Metatherian S2	826.84	0
10614	G6PD	0	0	0	0	0	0	0	0	0	0	0	0	0	0	0	0	0	0	0	0	0	0	0	0	0	0	0	Eutherian S2/S3 & Metatherian S2	826.84	0
10615	IKBKG	0	0	0	0	0	0	0	0	0	0	0	0	0	0	0	0	0	0	0	0	0	0	0	0	0	0	0	Eutherian S2/S3 & Metatherian S2	826.84	0
10616	GAB3	0	0	0	0	0	0	0	0	0	0	0	0	0	0	0	0	0	0	0	0	0	0	0	0	0	0	0	Eutherian S2/S3 & Metatherian S2	826.84	0
10617	LOC772071	0	0	0	0	0	0	0	0	0	0	0	0	0	0	0	0	0	0	0	0	0	0	0	0	0	0	0	Eutherian S2/S3 & Metatherian S2	826.84	0
10618	DKC1	0	0	0	0	0	0	0	0	0	0	0	0	0	0	0	0	0	0	0	0	0	0	0	0	0	0	0	Eutherian S2/S3 & Metatherian S2	826.84	0
10619	MPP1	0	0	0	0	0	0	0	0	0	0	0	0	0	0	0	0	0	0	0	0	0	0	0	0	0	0	0	Eutherian S2/S3 & Metatherian S2	826.84	0
10620	SMIM9	0	0	0	0	0	0	0	0	0	0	0	0	0	0	0	0	0	0	0	0	0	0	0	0	0	0	0	Eutherian S2/S3 & Metatherian S2	826.84	0
10621	F8	0	0	0	0	0	0	0	0	0	0	0	0	0	0	0	0	0	0	0	0	0	0	0	0	0	0	0	Eutherian S2/S3 & Metatherian S2	826.84	0
10622	H2AB1	0	0	0	0	0	0	0	0	0	0	0	0	0	0	0	0	0	0	0	0	0	0	0	0	0	0	0	Eutherian S2/S3 & Metatherian S2	826.84	0
10623	F8A1	0	0	0	0	0	0	0	0	0	0	0	0	0	0	0	0	0	0	0	0	0	0	0	0	0	0	0	Eutherian S2/S3 & Metatherian S2	826.84	0
10624	FUNDC2	0	0	0	0	0	0	0	0	0	0	0	0	0	0	0	0	0	0	0	0	0	0	0	0	0	0	0	Eutherian S2/S3 & Metatherian S2	826.84	0
10625	MTCP1	0	0	0	0	0	0	0	0	0	0	0	0	0	0	0	0	0	0	0	0	0	0	0	0	0	0	0	Eutherian S2/S3 & Metatherian S2	826.84	0
10626	BRCC3	0	0	0	0	0	0	0	0	0	0	0	0	0	0	0	0	0	0	0	0	0	0	0	0	0	0	0	Eutherian S2/S3 & Metatherian S2	826.84	0
10627	VBP1	0	0	0	0	0	0	0	0	0	0	0	0	0	0	0	0	0	0	0	0	0	0	0	0	0	0	0	Eutherian S2/S3 & Metatherian S2	826.84	0
10628	RAB39B	0	0	0	0	0	0	0	0	0	0	0	0	0	0	0	0	0	0	0	0	0	0	0	0	0	0	0	Eutherian S2/S3 & Metatherian S2	826.84	0
10629	CLIC2	0	0	0	0	0	0	0	0	0	0	0	0	0	0	0	0	0	0	0	0	0	0	0	0	0	0	0	Eutherian S2/S3 & Metatherian S2	826.84	0
10630	H2AB2	0	0	0	0	0	0	0	0	0	0	0	0	0	0	0	0	0	0	0	0	0	0	0	0	0	0	0	Eutherian S2/S3 & Metatherian S2	826.84	0
10631	TMLHE	0	0	0	0	0	0	0	0	0	0	0	0	0	0	0	0	0	0	0	0	0	0	0	0	0	0	0	Eutherian S2/S3 & Metatherian S2	826.84	0
10632	LOC769755	0	0	0	0	0	0	0	0	0	0	0	0	0	0	0	0	0	0	0	0	0	0	0	0	0	0	0	Eutherian S2/S3 & Metatherian S2	826.84	0
10633	SPRY3	0	0	0	0	0	0	0	0	0	0	0	0	0	0	0	0	0	0	0	0	0	0	0	0	0	0	0	Eutherian S2/S3 & Metatherian S2	826.84	0
10634	VAMP7	0	0	0	0	0	0	0	0	0	0	0	0	0	0	0	0	0	0	0	0	0	0	0	0	0	0	0	Eutherian S2/S3 & Metatherian S2	826.84	0
10635	WASH6P	0	0	0	0	0	0	0	0	0	0	0	0	0	0	0	0	0	0	0	0	0	0	0	0	0	0	0	Eutherian S2/S3 & Metatherian S2	826.84	0
