# Supplementary material for: Dosage-sensitive functions in embryonic development drove the survival of genes on sex-specific chromosomes in snakes, birds, and mammals
Source: HighWire-hosted journal article supplement (doi:10.1101/gr.268516.120), 2021-01-21
Supplement: Supplemental_Table_S24.xlsx [file Supplemental_Table_S24.xlsx]

## Sheet: Sheet1
data.name	median.nonsurvivors	median.survivors	p.value	number.nonsurvivors	number.survivors	alternative	null.value	statistic	method
na.omit(dead$Huang_pHI) and na.omit(live$Huang_pHI)	0.194	0.305	1.07213e-13	1849	276	less	0	185374	Wilcoxon rank sum test with continuity correction				5A
na.omit(deadt$Huang_pHI) and na.omit(livet$Huang_pHI)	0.2	0.359	0.00243996	509	39	less	0	7242.5	Wilcoxon rank sum test with continuity correction
na.omit(deada$Huang_pHI) and na.omit(livea$Huang_pHI)	0.1965	0.29	3.76085e-05	416	149	less	0	24222	Wilcoxon rank sum test with continuity correction
na.omit(deadc$Huang_pHI) and na.omit(livec$Huang_pHI)	0.189	0.3155	2.07312e-08	924	88	less	0	26286.5	Wilcoxon rank sum test with continuity correction				2A
na.omit(dead$ExAC_Deletion_Intolerance) and na.omit(live$ExAC_Deletion_Intolerance)	0.243756	0.446466	4.08859e-05	1439	253	less	0	153804	Wilcoxon rank sum test with continuity correction				5B
na.omit(dead$ExAC_Deletion_Intolerance) and na.omit(live$ExAC_Deletion_Intolerance)	0.218505	NA	4.08859e-05	6	0	less	0	153804	Wilcoxon rank sum test with continuity correction
na.omit(deada$ExAC_Deletion_Intolerance) and na.omit(livea$ExAC_Deletion_Intolerance)	0.189794	0.369968	0.00125414	466	156	less	0	30476	Wilcoxon rank sum test with continuity correction
na.omit(deadc$ExAC_Deletion_Intolerance) and na.omit(livec$ExAC_Deletion_Intolerance)	0.259461	0.620364	0.000318594	967	97	less	0	37046.5	Wilcoxon rank sum test with continuity correction				2B
na.omit(dead$ExAC_Duplication_Intolerance) and na.omit(live$ExAC_Duplication_Intolerance)	0.19946	0.402584	0.00440756	1439	253	less	0	163264	Wilcoxon rank sum test with continuity correction				5C
na.omit(dead$ExAC_Duplication_Intolerance) and na.omit(live$ExAC_Duplication_Intolerance)	0.00972918	NA	0.00440756	6	0	less	0	163264	Wilcoxon rank sum test with continuity correction
na.omit(deada$ExAC_Duplication_Intolerance) and na.omit(livea$ExAC_Duplication_Intolerance)	0.126593	0.304238	0.015838	466	156	less	0	32174	Wilcoxon rank sum test with continuity correction
na.omit(deadc$ExAC_Duplication_Intolerance) and na.omit(livec$ExAC_Duplication_Intolerance)	0.27615	0.489606	0.0120475	967	97	less	0	40391.5	Wilcoxon rank sum test with continuity correction				2C
na.omit(dead$Gene_Average_PCT) and na.omit(live$Gene_Average_PCT)	0.0735357	0.165619	5.07617e-19	1848	303	less	0	191454	Wilcoxon rank sum test with continuity correction				5D
na.omit(deadt$Gene_Average_PCT) and na.omit(livet$Gene_Average_PCT)	0.0720341	0.133879	0.0193243	470	43	less	0	8180.5	Wilcoxon rank sum test with continuity correction
na.omit(deada$Gene_Average_PCT) and na.omit(livea$Gene_Average_PCT)	0.0698667	0.166079	4.57684e-11	464	165	less	0	25287.5	Wilcoxon rank sum test with continuity correction
na.omit(deadc$Gene_Average_PCT) and na.omit(livec$Gene_Average_PCT)	0.0754498	0.176813	6.55098e-10	914	95	less	0	27015.5	Wilcoxon rank sum test with continuity correction				2D
na.omit(dead$HSA.GGA_miRNA_sites) and na.omit(live$HSA.GGA_miRNA_sites)	4	10	3.13131e-09	585	180	less	0	37655	Wilcoxon rank sum test with continuity correction				5F
na.omit(deadt$HSA.GGA_miRNA_sites) and na.omit(livet$HSA.GGA_miRNA_sites)	4	10	0.0026959	134	24	less	0	1036	Wilcoxon rank sum test with continuity correction
na.omit(deada$HSA.GGA_miRNA_sites) and na.omit(livea$HSA.GGA_miRNA_sites)	4	10	5.70158e-06	159	106	less	0	5756	Wilcoxon rank sum test with continuity correction
na.omit(deadc$HSA.GGA_miRNA_sites) and na.omit(livec$HSA.GGA_miRNA_sites)	5	9.5	0.00513537	292	50	less	0	5649	Wilcoxon rank sum test with continuity correction				4B
na.omit(dead$HSA.ACA_miRNA_sites) and na.omit(live$HSA.ACA_miRNA_sites)	3	7	8.92229e-11	574	170	less	0	33223.5	Wilcoxon rank sum test with continuity correction				5G
na.omit(deadt$HSA.ACA_miRNA_sites) and na.omit(livet$HSA.ACA_miRNA_sites)	3	6	0.00941425	118	24	less	0	991	Wilcoxon rank sum test with continuity correction
na.omit(deada$HSA.ACA_miRNA_sites) and na.omit(livea$HSA.ACA_miRNA_sites)	3	8	2.48984e-06	157	96	less	0	4970.5	Wilcoxon rank sum test with continuity correction
na.omit(deadc$HSA.ACA_miRNA_sites) and na.omit(livec$HSA.ACA_miRNA_sites)	3	6	0.00437347	299	50	less	0	5759	Wilcoxon rank sum test with continuity correction				4C
na.omit(dead$HSA.MMU_dNdS) and na.omit(live$HSA.MMU_dNdS)	0.115585	0.0603781	2.37694e-15	2076	288	greater	0	383976	Wilcoxon rank sum test with continuity correction				5O
na.omit(deadt$HSA.MMU_dNdS) and na.omit(livet$HSA.MMU_dNdS)	0.131451	0.0594815	0.00210276	515	35	greater	0	11617	Wilcoxon rank sum test with continuity correction
na.omit(deada$HSA.MMU_dNdS) and na.omit(livea$HSA.MMU_dNdS)	0.119534	0.076843	3.41506e-06	501	159	greater	0	49254	Wilcoxon rank sum test with continuity correction
na.omit(deadc$HSA.MMU_dNdS) and na.omit(livec$HSA.MMU_dNdS)	0.108346	0.0430959	8.77573e-11	1060	94	greater	0	69582.5	Wilcoxon rank sum test with continuity correction				4G
na.omit(dead$GGA.TGU_dNdS) and na.omit(live$GGA.TGU_dNdS)	0.110097	0.0704388	2.43231e-06	1487	240	greater	0	211206	Wilcoxon rank sum test with continuity correction				5N
na.omit(deadt$GGA.TGU_dNdS) and na.omit(livet$GGA.TGU_dNdS)	0.0834593	0.0361585	0.00158211	355	28	greater	0	6635	Wilcoxon rank sum test with continuity correction
na.omit(deada$GGA.TGU_dNdS) and na.omit(livea$GGA.TGU_dNdS)	0.130915	0.101914	0.000241582	443	149	greater	0	39307	Wilcoxon rank sum test with continuity correction
na.omit(deadc$GGA.TGU_dNdS) and na.omit(livec$GGA.TGU_dNdS)	0.103922	0.0466268	8.79275e-06	689	63	greater	0	28790	Wilcoxon rank sum test with continuity correction				4F
na.omit(dead$NSC.ACA_dNdS) and na.omit(live$NSC.ACA_dNdS)	0.116616	0.0738783	5.56301e-14	1417	246	greater	0	225926	Wilcoxon rank sum test with continuity correction				5M
na.omit(deadt$NSC.ACA_dNdS) and na.omit(livet$NSC.ACA_dNdS)	0.0939783	0.0554079	0.0515467	307	36	greater	0	6444	Wilcoxon rank sum test with continuity correction
na.omit(deada$NSC.ACA_dNdS) and na.omit(livea$NSC.ACA_dNdS)	0.136175	0.0891619	3.42472e-08	371	123	greater	0	30219	Wilcoxon rank sum test with continuity correction
na.omit(deadc$NSC.ACA_dNdS) and na.omit(livec$NSC.ACA_dNdS)	0.116616	0.0643425	1.87312e-10	739	87	greater	0	45333	Wilcoxon rank sum test with continuity correction				2H
na.omit(dead$HSA_Expression_Breadth) and na.omit(live$HSA_Expression_Breadth)	0.20601	0.26318	1.62622e-05	1573	272	less	0	180234	Wilcoxon rank sum test with continuity correction				5J
na.omit(deadt$HSA_Expression_Breadth) and na.omit(livet$HSA_Expression_Breadth)	0.200769	0.334717	0.00488812	372	39	less	0	5434	Wilcoxon rank sum test with continuity correction
na.omit(deada$HSA_Expression_Breadth) and na.omit(livea$HSA_Expression_Breadth)	0.228228	0.258924	0.177573	398	146	less	0	27552	Wilcoxon rank sum test with continuity correction
na.omit(deadc$HSA_Expression_Breadth) and na.omit(livec$HSA_Expression_Breadth)	0.197327	0.247678	0.000360204	803	87	less	0	27229.5	Wilcoxon rank sum test with continuity correction				4E
na.omit(dead$GGA_Expression_Breadth) and na.omit(live$GGA_Expression_Breadth)	0.28211	0.369972	6.0452e-07	1110	200	less	0	87094	Wilcoxon rank sum test with continuity correction				5I
na.omit(deadt$GGA_Expression_Breadth) and na.omit(livet$GGA_Expression_Breadth)	0.275422	0.367653	0.00129807	357	31	less	0	3729	Wilcoxon rank sum test with continuity correction
na.omit(deada$GGA_Expression_Breadth) and na.omit(livea$GGA_Expression_Breadth)	0.293581	0.342498	0.10559	361	127	less	0	21214	Wilcoxon rank sum test with continuity correction
na.omit(deadc$GGA_Expression_Breadth) and na.omit(livec$GGA_Expression_Breadth)	0.27456	0.472895	2.278e-06	392	42	less	0	4690	Wilcoxon rank sum test with continuity correction				4D
na.omit(dead$DAC_Expression_Breadth) and na.omit(live$DAC_Expression_Breadth)	0.485174	0.56806	2.10141e-06	1593	283	less	0	186772	Wilcoxon rank sum test with continuity correction
na.omit(deadt$DAC_Expression_Breadth) and na.omit(livet$DAC_Expression_Breadth)	0.494313	0.65621	0.000573568	363	40	less	0	4986	Wilcoxon rank sum test with continuity correction
na.omit(deada$DAC_Expression_Breadth) and na.omit(livea$DAC_Expression_Breadth)	0.49189	0.513772	0.124503	415	154	less	0	29946	Wilcoxon rank sum test with continuity correction
na.omit(deadc$DAC_Expression_Breadth) and na.omit(livec$DAC_Expression_Breadth)	0.483491	0.606979	1.01359e-05	815	89	less	0	26299	Wilcoxon rank sum test with continuity correction
na.omit(dead$TSI_Expression_Breadth) and na.omit(live$TSI_Expression_Breadth)	0.485338	0.579068	4.85866e-07	1463	269	less	0	159853	Wilcoxon rank sum test with continuity correction				5H
na.omit(deadt$TSI_Expression_Breadth) and na.omit(livet$TSI_Expression_Breadth)	0.486336	0.669756	0.000129705	326	37	less	0	3821	Wilcoxon rank sum test with continuity correction
na.omit(deada$TSI_Expression_Breadth) and na.omit(livea$TSI_Expression_Breadth)	0.487522	0.51697	0.0835722	387	146	less	0	26060	Wilcoxon rank sum test with continuity correction
na.omit(deadc$TSI_Expression_Breadth) and na.omit(livec$TSI_Expression_Breadth)	0.484971	0.60717	8.59524e-06	750	86	less	0	23132	Wilcoxon rank sum test with continuity correction				2E
log(na.omit(dead$HSA_E4_RPKM) + 1) and log(na.omit(live$HSA_E4_RPKM) + 1)	1.89459	2.27213	0.000379947	1484	271	less	0	175254	Wilcoxon rank sum test with continuity correction				5L
log(na.omit(deadt$HSA_E4_RPKM) + 1) and log(na.omit(livet$HSA_E4_RPKM) + 1)	1.87944	2.17313	0.0603038	342	38	less	0	5500.5	Wilcoxon rank sum test with continuity correction
log(na.omit(deada$HSA_E4_RPKM) + 1) and log(na.omit(livea$HSA_E4_RPKM) + 1)	1.70475	2.08565	0.0149132	377	138	less	0	22763.5	Wilcoxon rank sum test with continuity correction
log(na.omit(deadc$HSA_E4_RPKM) + 1) and log(na.omit(livec$HSA_E4_RPKM) + 1)	1.98787	2.5177	0.00354112	765	95	less	0	30188	Wilcoxon rank sum test with continuity correction				2G
log(na.omit(dead$GGA_Blastocyst_FPKM) + 1) and log(na.omit(live$GGA_Blastocyst_FPKM) + 1)	2.04963	2.95696	5.18003e-10	1533	255	less	0	148860	Wilcoxon rank sum test with continuity correction				5K
log(na.omit(deadt$GGA_Blastocyst_FPKM) + 1) and log(na.omit(livet$GGA_Blastocyst_FPKM) + 1)	2.09818	3.54002	0.000809042	380	32	less	0	4040	Wilcoxon rank sum test with continuity correction
log(na.omit(deada$GGA_Blastocyst_FPKM) + 1) and log(na.omit(livea$GGA_Blastocyst_FPKM) + 1)	2.18295	2.58409	0.0105418	459	156	less	0	31379.5	Wilcoxon rank sum test with continuity correction
log(na.omit(deadc$GGA_Blastocyst_FPKM) + 1) and log(na.omit(livec$GGA_Blastocyst_FPKM) + 1)	1.97122	3.67605	1.04821e-09	694	67	less	0	12955.5	Wilcoxon rank sum test with continuity correction				2F
na.omit(dead$HSA_Testis_TSI) and na.omit(live$HSA_Testis_TSI)	0.0193605	0.0244142	0.0208925	2117	319	less	0	313822	Wilcoxon rank sum test with continuity correction
na.omit(deadt$HSA_Testis_TSI) and na.omit(livet$HSA_Testis_TSI)	0.0140298	0.0206835	0.158658	535	46	less	0	11212	Wilcoxon rank sum test with continuity correction
na.omit(deada$HSA_Testis_TSI) and na.omit(livea$HSA_Testis_TSI)	0.023515	0.0252295	0.724811	502	170	less	0	43976	Wilcoxon rank sum test with continuity correction
na.omit(deadc$HSA_Testis_TSI) and na.omit(livec$HSA_Testis_TSI)	0.0202213	0.0250505	0.0280811	1080	103	less	0	49292.5	Wilcoxon rank sum test with continuity correction
na.omit(dead$HSA_Prostate_TSI) and na.omit(live$HSA_Prostate_TSI)	0.0206968	0.0253109	1.40161e-08	2035	316	less	0	259184	Wilcoxon rank sum test with continuity correction
na.omit(deadt$HSA_Prostate_TSI) and na.omit(livet$HSA_Prostate_TSI)	0.021152	0.0283864	9.64063e-06	500	45	less	0	6926	Wilcoxon rank sum test with continuity correction
na.omit(deada$HSA_Prostate_TSI) and na.omit(livea$HSA_Prostate_TSI)	0.0205092	0.0239215	0.000657765	487	169	less	0	34331.5	Wilcoxon rank sum test with continuity correction
na.omit(deadc$HSA_Prostate_TSI) and na.omit(livec$HSA_Prostate_TSI)	0.0204635	0.0246703	0.00342982	1048	102	less	0	44790.5	Wilcoxon rank sum test with continuity correction
na.omit(dead$HSA_Ovary_TSI) and na.omit(live$HSA_Ovary_TSI)	0.0201569	0.0239935	3.65565e-07	2024	317	less	0	265380	Wilcoxon rank sum test with continuity correction
na.omit(deadt$HSA_Ovary_TSI) and na.omit(livet$HSA_Ovary_TSI)	0.0219286	0.0322547	3.84818e-05	495	46	less	0	7375	Wilcoxon rank sum test with continuity correction
na.omit(deada$HSA_Ovary_TSI) and na.omit(livea$HSA_Ovary_TSI)	0.0195907	0.0225245	0.00349059	483	168	less	0	34907	Wilcoxon rank sum test with continuity correction
na.omit(deadc$HSA_Ovary_TSI) and na.omit(livec$HSA_Ovary_TSI)	0.0197639	0.0227116	0.00206043	1046	103	less	0	44650.5	Wilcoxon rank sum test with continuity correction
na.omit(deadzw$HSA_Ovary_TSI) and na.omit(livezw$HSA_Ovary_TSI)	0.0196933	0.0226576	1.55117e-05	1529	271	less	0	174328	Wilcoxon rank sum test with continuity correction
na.omit(dead$HSA_Fallopian_TSI) and na.omit(live$HSA_Fallopian_TSI)	0.0250237	0.0322206	4.95444e-06	2027	317	less	0	271760	Wilcoxon rank sum test with continuity correction
na.omit(deadt$HSA_Fallopian_TSI) and na.omit(livet$HSA_Fallopian_TSI)	0.0276452	0.0389961	0.00430993	506	46	less	0	8917	Wilcoxon rank sum test with continuity correction
na.omit(deada$HSA_Fallopian_TSI) and na.omit(livea$HSA_Fallopian_TSI)	0.0246885	0.0285736	0.00158807	483	168	less	0	34377	Wilcoxon rank sum test with continuity correction
na.omit(deadc$HSA_Fallopian_TSI) and na.omit(livec$HSA_Fallopian_TSI)	0.0243533	0.0332618	0.00304562	1038	103	less	0	44707.5	Wilcoxon rank sum test with continuity correction
na.omit(deadzw$HSA_Fallopian_TSI) and na.omit(livezw$HSA_Fallopian_TSI)	0.0243853	0.0309341	3.02325e-05	1521	271	less	0	174618	Wilcoxon rank sum test with continuity correction
na.omit(dead$HSA_Uterus_TSI) and na.omit(live$HSA_Uterus_TSI)	0.0208071	0.0248263	1.95084e-06	2027	317	less	0	269548	Wilcoxon rank sum test with continuity correction
na.omit(deadt$HSA_Uterus_TSI) and na.omit(livet$HSA_Uterus_TSI)	0.0215876	0.0278305	0.000886834	500	46	less	0	8299	Wilcoxon rank sum test with continuity correction
na.omit(deada$HSA_Uterus_TSI) and na.omit(livea$HSA_Uterus_TSI)	0.0208065	0.0221102	0.0905931	482	168	less	0	37685	Wilcoxon rank sum test with continuity correction
na.omit(deadc$HSA_Uterus_TSI) and na.omit(livec$HSA_Uterus_TSI)	0.0205923	0.0264858	3.54953e-06	1045	103	less	0	39400.5	Wilcoxon rank sum test with continuity correction
na.omit(deadzw$HSA_Uterus_TSI) and na.omit(livezw$HSA_Uterus_TSI)	0.0206158	0.0241263	4.49341e-05	1527	271	less	0	176060	Wilcoxon rank sum test with continuity correction
na.omit(dead$HSA_Cervix_TSI) and na.omit(live$HSA_Cervix_TSI)	0.0180528	0.0230596	2.71672e-09	2019	316	less	0	253992	Wilcoxon rank sum test with continuity correction
na.omit(deadt$HSA_Cervix_TSI) and na.omit(livet$HSA_Cervix_TSI)	0.0177432	0.0240535	0.000167043	493	45	less	0	7511	Wilcoxon rank sum test with continuity correction
na.omit(deada$HSA_Cervix_TSI) and na.omit(livea$HSA_Cervix_TSI)	0.018014	0.0210646	0.00791487	485	168	less	0	35655	Wilcoxon rank sum test with continuity correction
na.omit(deadc$HSA_Cervix_TSI) and na.omit(livec$HSA_Cervix_TSI)	0.0181358	0.0250973	1.66183e-06	1041	103	less	0	38738.5	Wilcoxon rank sum test with continuity correction
na.omit(deadzw$HSA_Cervix_TSI) and na.omit(livezw$HSA_Cervix_TSI)	0.0180947	0.0228102	5.69573e-07	1526	271	less	0	168470	Wilcoxon rank sum test with continuity correction
na.omit(dead$HSA_Vagina_TSI) and na.omit(live$HSA_Vagina_TSI)	0.0198625	0.023008	4.92518e-06	2022	314	less	0	268300	Wilcoxon rank sum test with continuity correction
na.omit(deadt$HSA_Vagina_TSI) and na.omit(livet$HSA_Vagina_TSI)	0.0184697	0.0259827	0.000108915	496	44	less	0	7244	Wilcoxon rank sum test with continuity correction
na.omit(deada$HSA_Vagina_TSI) and na.omit(livea$HSA_Vagina_TSI)	0.0203933	0.0217477	0.0535041	485	168	less	0	37343	Wilcoxon rank sum test with continuity correction
na.omit(deadc$HSA_Vagina_TSI) and na.omit(livec$HSA_Vagina_TSI)	0.0200809	0.0235728	0.000622103	1041	102	less	0	42818.5	Wilcoxon rank sum test with continuity correction
na.omit(deadzw$HSA_Vagina_TSI) and na.omit(livezw$HSA_Vagina_TSI)	0.0201769	0.0224798	0.000844553	1526	270	less	0	181344	Wilcoxon rank sum test with continuity correction
na.omit(dead$GGA_Testis_TSI) and na.omit(live$GGA_Testis_TSI)	0.0284837	0.0390223	0.0208394	1491	268	less	0	184202	Wilcoxon rank sum test with continuity correction
na.omit(deadt$GGA_Testis_TSI) and na.omit(livet$GGA_Testis_TSI)	0.0258606	0.0555773	0.00177616	298	26	less	0	2538	Wilcoxon rank sum test with continuity correction
na.omit(deada$GGA_Testis_TSI) and na.omit(livea$GGA_Testis_TSI)	0.0308549	0.0331266	0.584751	448	162	less	0	36699	Wilcoxon rank sum test with continuity correction
na.omit(deadc$GGA_Testis_TSI) and na.omit(livec$GGA_Testis_TSI)	0.0287395	0.0451858	0.0573774	745	80	less	0	26605	Wilcoxon rank sum test with continuity correction
na.omit(dead$GGA_Ovary_TSI) and na.omit(live$GGA_Ovary_TSI)	0.0364326	0.0387962	0.181102	1474	268	less	0	190614	Wilcoxon rank sum test with continuity correction
na.omit(deadt$GGA_Ovary_TSI) and na.omit(livet$GGA_Ovary_TSI)	0.0376259	0.0472236	0.16709	303	26	less	0	3489	Wilcoxon rank sum test with continuity correction
na.omit(deada$GGA_Ovary_TSI) and na.omit(livea$GGA_Ovary_TSI)	0.0338502	0.0327803	0.586093	435	161	less	0	35423	Wilcoxon rank sum test with continuity correction
na.omit(deadc$GGA_Ovary_TSI) and na.omit(livec$GGA_Ovary_TSI)	0.0368314	0.0483737	0.0308875	736	81	less	0	26042	Wilcoxon rank sum test with continuity correction
na.omit(deadzw$GGA_Ovary_TSI) and na.omit(livezw$GGA_Ovary_TSI)	0.0357708	0.0382678	0.242369	1171	242	less	0	137653	Wilcoxon rank sum test with continuity correction
na.omit(dead$DAC_Testis_TSI) and na.omit(live$DAC_Testis_TSI)	0.220917	0.233929	0.125432	1569	283	less	0	212505	Wilcoxon rank sum test with continuity correction
na.omit(deadt$DAC_Testis_TSI) and na.omit(livet$DAC_Testis_TSI)	0.203316	0.246306	0.0300729	359	40	less	0	5879	Wilcoxon rank sum test with continuity correction
na.omit(deada$DAC_Testis_TSI) and na.omit(livea$DAC_Testis_TSI)	0.207018	0.220201	0.308813	406	154	less	0	30408	Wilcoxon rank sum test with continuity correction
na.omit(deadc$DAC_Testis_TSI) and na.omit(livec$DAC_Testis_TSI)	0.243649	0.258636	0.159325	804	89	less	0	33475	Wilcoxon rank sum test with continuity correction
na.omit(dead$TSI_Ovary_TSI) and na.omit(live$TSI_Ovary_TSI)	0.102313	0.0975113	0.685978	1547	280	less	0	220515	Wilcoxon rank sum test with continuity correction
na.omit(deadt$TSI_Ovary_TSI) and na.omit(livet$TSI_Ovary_TSI)	0.0930034	0.105951	0.0561943	349	41	less	0	6070	Wilcoxon rank sum test with continuity correction
na.omit(deada$TSI_Ovary_TSI) and na.omit(livea$TSI_Ovary_TSI)	0.0985659	0.0925077	0.642799	412	149	less	0	31314	Wilcoxon rank sum test with continuity correction
na.omit(deadc$TSI_Ovary_TSI) and na.omit(livec$TSI_Ovary_TSI)	0.108845	0.102068	0.779313	786	90	less	0	37120	Wilcoxon rank sum test with continuity correction
na.omit(deadzw$TSI_Ovary_TSI) and na.omit(livezw$TSI_Ovary_TSI)	0.10565	0.0958228	0.899151	1198	239	less	0	150639	Wilcoxon rank sum test with continuity correction

## Sheet: Sheet2
Supplemental Table S24: Information on statistical tests, alternative hypotheses, test statistics, and p-values
Display Item	Comparison	Test	Alternative Hypothesis	Test Statistic	p-value
Figure 2A	Z–W pairs vs. other ancestral Z genes	Wilcoxon rank sum	one-tailed	26286.5	2.07312e-08
Figure 2B	Z–W pairs vs. other ancestral Z genes	Wilcoxon rank sum	one-tailed	37046.5	0.000318594
Table 3	Z–W pairs vs. other ancestral Z genes	Fisher's Exact	one-tailed		0.001207
Figure 2C	Z–W pairs vs. other ancestral Z genes	Wilcoxon rank sum	one-tailed	40391.5	0.0120475
Figure 2D	Z–W pairs vs. other ancestral Z genes	Wilcoxon rank sum	one-tailed	27015.5	6.55e-10
Supplemental Figure S5A	Z–W pairs vs. other ancestral Z genes	Kolmogorov–Smirnov	two-tailed		< 2.2×10-16
Supplemental Figure S5B	Z–W pairs vs. other ancestral Z genes	Wilcoxon rank sum	one-tailed	5649	0.00513537
Supplemental Figure S5C	Z–W pairs vs. other ancestral Z genes	Wilcoxon rank sum	one-tailed	5759	0.00437347
Figure 2E	Z–W pairs vs. other ancestral Z genes	Wilcoxon rank sum	one-tailed	23132	8.59524e-06
Supplemental Figure S5D	Z–W pairs vs. other ancestral Z genes	Wilcoxon rank sum	one-tailed	4690	2.278e-06
Supplemental Figure S5E	Z–W pairs vs. other ancestral Z genes	Wilcoxon rank sum	one-tailed	27229.5	0.000360204
Figure 2F	Z–W pairs vs. other ancestral Z genes	Wilcoxon rank sum	one-tailed	12955.5	1.04821e-09
Figure 2G	Z–W pairs vs. other ancestral Z genes	Wilcoxon rank sum	one-tailed	30188	0.00354112
Figure 2H	Z–W pairs vs. other ancestral Z genes	Wilcoxon rank sum	one-tailed	45333	1.87312e-10
Supplemental Figure S5F	Z–W pairs vs. other ancestral Z genes	Wilcoxon rank sum	one-tailed	28790	8.79275e-06
Supplemental Figure S5G	Z–W pairs vs. other ancestral Z genes	Wilcoxon rank sum	one-tailed	69582.5	8.77573e-11
Supplemental Figure S6A	survivors vs. non-survivors	Wilcoxon rank sum	one-tailed	185374	1.07213e-13
Supplemental Figure S6B	survivors vs. non-survivors	Wilcoxon rank sum	one-tailed	153804	4.08859e-05
Supplemental Figure S6C	survivors vs. non-survivors	Wilcoxon rank sum	one-tailed	163264	0.00440756
Supplemental Figure S6D	survivors vs. non-survivors	Wilcoxon rank sum	one-tailed	191454	5.07617e-19
Supplemental Figure S6E	survivors vs. non-survivors	Kolmogorov–Smirnov	two-tailed		< 2.2×10-16
Supplemental Figure S6F	survivors vs. non-survivors	Wilcoxon rank sum	one-tailed	37655	3.13131e-09
Supplemental Figure S6G	survivors vs. non-survivors	Wilcoxon rank sum	one-tailed	33223.5	8.92229e-11
Supplemental Figure S6H	survivors vs. non-survivors	Wilcoxon rank sum	one-tailed	159853	4.85866e-07
Supplemental Figure S6I	survivors vs. non-survivors	Wilcoxon rank sum	one-tailed	87094	6.0452e-07
Supplemental Figure S6J	survivors vs. non-survivors	Wilcoxon rank sum	one-tailed	180234	1.62622e-05
Supplemental Figure S6K	survivors vs. non-survivors	Wilcoxon rank sum	one-tailed	148860	5.18003e-10
Supplemental Figure S6L	survivors vs. non-survivors	Wilcoxon rank sum	one-tailed	175254	0.000379947
Supplemental Figure S6M	survivors vs. non-survivors	Wilcoxon rank sum	one-tailed	225926	5.56301e-14
Supplemental Figure S6N	survivors vs. non-survivors	Wilcoxon rank sum	one-tailed	211206	2.43231e-06
Supplemental Figure S6O	survivors vs. non-survivors	Wilcoxon rank sum	one-tailed	383976	2.37694e-15
Supplemental Figure S7	ficolin-1-rich granule lumen vs. rest of genome	Wilcoxon rank sum	one-tailed	665864	2.268e-08
Table 4	survivors vs. non-survivors	Fisher's Exact	one-tailed		0.00186
Table 5	survivors vs. non-survivors	Fisher's Exact	one-tailed		0.02217
Table 6	survivors vs. non-survivors	Fisher's Exact	one-tailed		0.02821
Table 7	survivors vs. non-survivors	Fisher's Exact	one-tailed		0.1439
Figure 4	chicken testis TSI + chicken expression breadth vs. chicken expression breadth	Wald test	two-tailed	1.11567	0.264564
Figure 4	viper testis TSI + viper expression breadth vs viper expression breadth	Wald test	two-tailed	0.275128	0.783218
Figure 4	human ovary TSI + human expression breadth vs. human expression breadth	Wald test	two-tailed	1.35802	0.174456
Figure 4	garter snake ovary TSI + garter snake expression breadth vs. garter snake expression breadth	Wald test	two-tailed	-0.902543	0.366769
Figure 4	human ovary TSI + human expression breadth vs. human expression breadth	Wald test	two-tailed	1.35802	0.174456
Figure 4	chicken ovary TSI + chicken expression breadth vs. chicken expression breadth	Wald test	two-tailed	0.051631	0.958823
Figure 4	chicken testis TSI + chicken expression breadth vs. chicken testis TSI	Wald test	two-tailed	3.15209	0.00162106
Figure 4	viper testis TSI + viper expression breadth vs viper testis TSI	Wald test	two-tailed	3.02934	0.00245088
Figure 4	human ovary TSI + human expression breadth vs. human ovary TSI	Wald test	two-tailed	2.7002	0.00692986
Figure 4	garter snake ovary TSI + garter snake expression breadth vs. garter snake ovary TSI	Wald test	two-tailed	3.68877	0.00022534
Figure 4	human ovary TSI + human expression breadth vs. human ovary TSI	Wald test	two-tailed	2.7002	0.00692986
Figure 4	chicken ovary TSI + chicken expression breadth vs. chicken ovary TSI	Wald test	two-tailed	3.05268	0.00226808
Table 8	survivors vs. non-survivors	Fisher's Exact	one-tailed		0.285
